# Supplementary material for: Quo vadis? Microbial profiling revealed strong effects of cleanroom maintenance and routes of contamination in indoor environments
Source: Sci Rep. 2015 Mar 17;5:9156. doi: 10.1038/srep09156 (PMC4361859; doi:10.1038/srep09156)
Supplement: Supplementary Information [file srep09156-s1.pdf]

## **Supplementary Figures to:**

### **Quo vadis? Microbial profiling of vicinal office, changing and clean rooms reveal clearly different microbiomes and routes of contamination**

**Christine Moissl-Eichinger<sup>1\*†</sup>, Anna K Auerbach<sup>1†</sup>, Alexander J Probst<sup>1†</sup>, Alexander Mahnert<sup>2†</sup>, Lauren Tom<sup>3</sup>, Yvette Piceno<sup>3</sup>, Gary L Andersen<sup>3</sup>, Kasthuri Venkateswaran<sup>4</sup>, Petra Rettberg<sup>5</sup>, Simon Barczyk<sup>5</sup>, Rüdiger Pukall<sup>6</sup>, Gabriele Berg<sup>2</sup>**

<sup>1</sup>Institute for Microbiology and Archaea Center, University of Regensburg, Universitaetsstrasse 31, 93053 Regensburg, Germany

<sup>2</sup> Institute of Environmental Biotechnology, Graz University of Technology, Petersgasse 12/I, 8010 Graz, Austria

<sup>3</sup> Lawrence Berkeley National Laboratory, Earth Sciences Division, 1 Cyclotron Rd., Berkeley, CA 94720, USA

<sup>4</sup> Jet Propulsion Laboratory, 4800 Oak Grove Drive, Pasadena, CA 91109, USA

<sup>5</sup> German Aerospace Center, Institute of Aerospace Medicine and Radiation Biology, Linder Höhe, 51147 Köln, Germany

<sup>6</sup> Leibniz Institute DSMZ - Deutsche Sammlung von Mikroorganismen und Zellkulturen GmbH, Inhoffenstraße 7 B, 38124 Braunschweig, Germany

Network analysis of pOTUs from pyrotagsequencing data visualized with the Cytoscape 2.8.3 layout edge-weighted spring embedded eweights. Samples from four different rooms are displayed as hexagonal nodes on an abstracted map of the clean room facility in colors yellow (CO – check out room), red (UR – changing room), light blue (CR8 – ISO8 clean room) and dark blue (CR5 – ISO5 clean room). pOTUs are displayed as nodes. Node color is defined by sample source and respective color mixtures (according to Itten's color circle) are used for shared pOTUs. pOTUs resolved till genus level are labelled. Node and font size represents abundance of pOTUs (score is indicated in the legend below). Edge width and opacity correlates with respective eweights (edge weights represent sequence abundance in respective pOTUs). Network layout (pOTUs distance) was slightly modified to fit on the abstracted map.

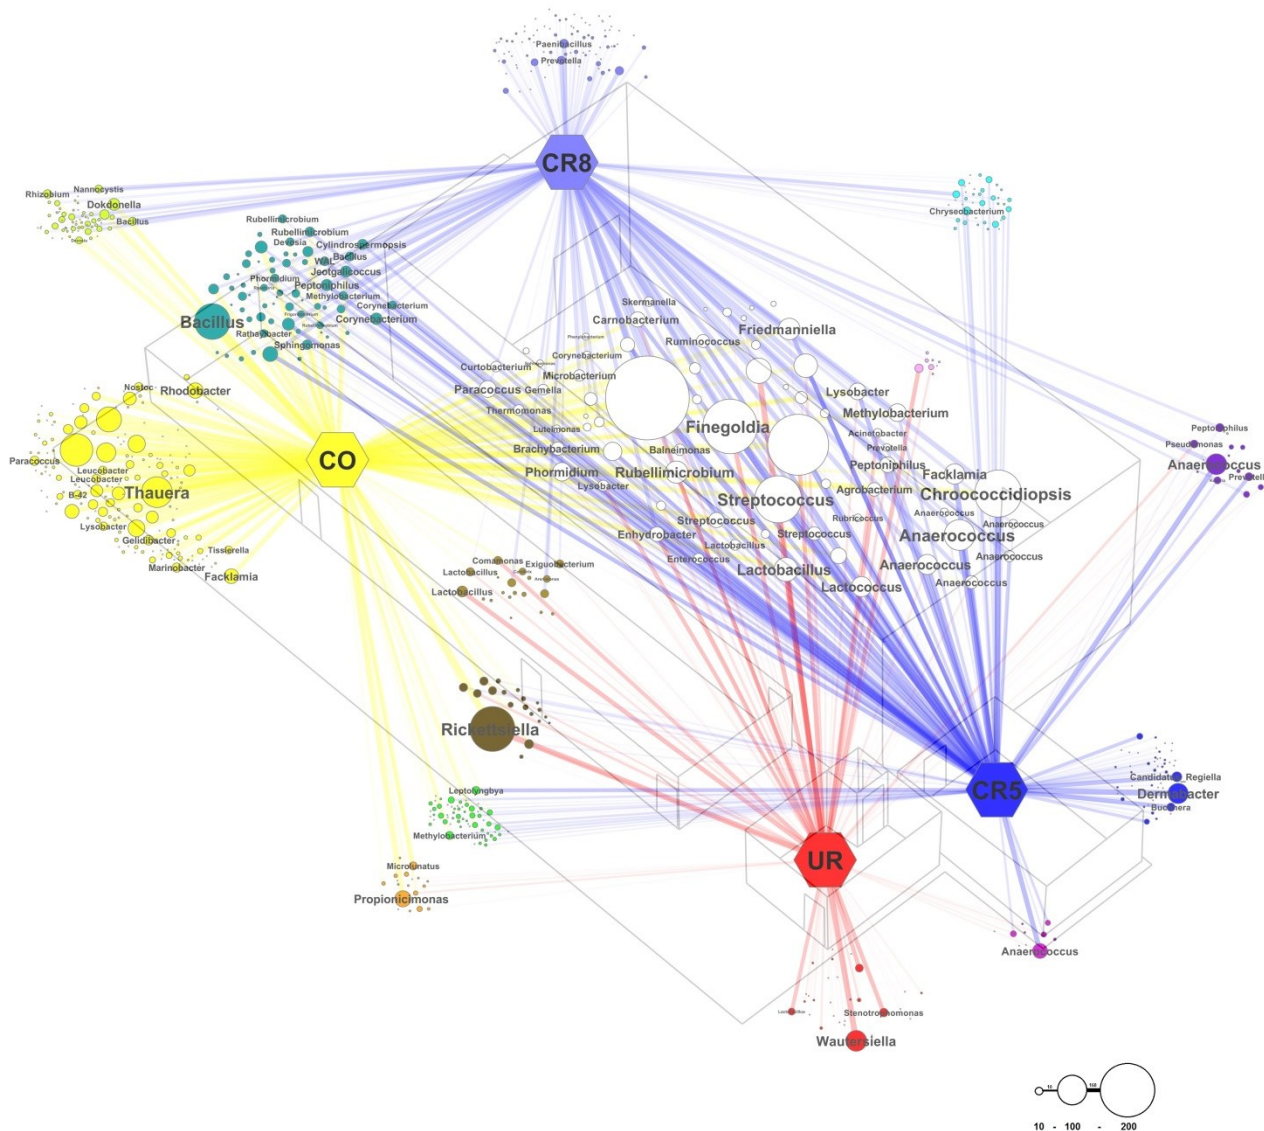

Supplementary Fig. S2:

Network analysis of rOTUs from PhyloChip data (based on binary incidences table) using Cytoscape 2.8.3 layout edge-weighted spring embedded eweights. Samples from four different rooms are displayed as octagonal nodes on an abstracted map of the clean room facility in colors yellow (CO – check out room), red (UR – changing room), light blue (CR8 – ISO8 clean room) and dark blue (CR5 – ISO5 clean room) and their corresponding PMA treated samples are shown as squares in green (CO\_PMA), magenta (UR\_PMA) and cyan (CR8\_PMA and CR5\_PMA). rOTUs are displayed as nodes. Node color is defined by sample source and respective color mixtures (according to Itten's color circle) are used for shared rOTUs. rOTUs resolved till genus level are labelled. Node and font size represents abundance of rOTUs (score is indicated in the legend below). Edge width and opacity correlates with respective eweights (edge weights represent sequence abundance in respective rOTUs). Network layout (rOTUs distance) was slightly modified to fit on the abstracted map.

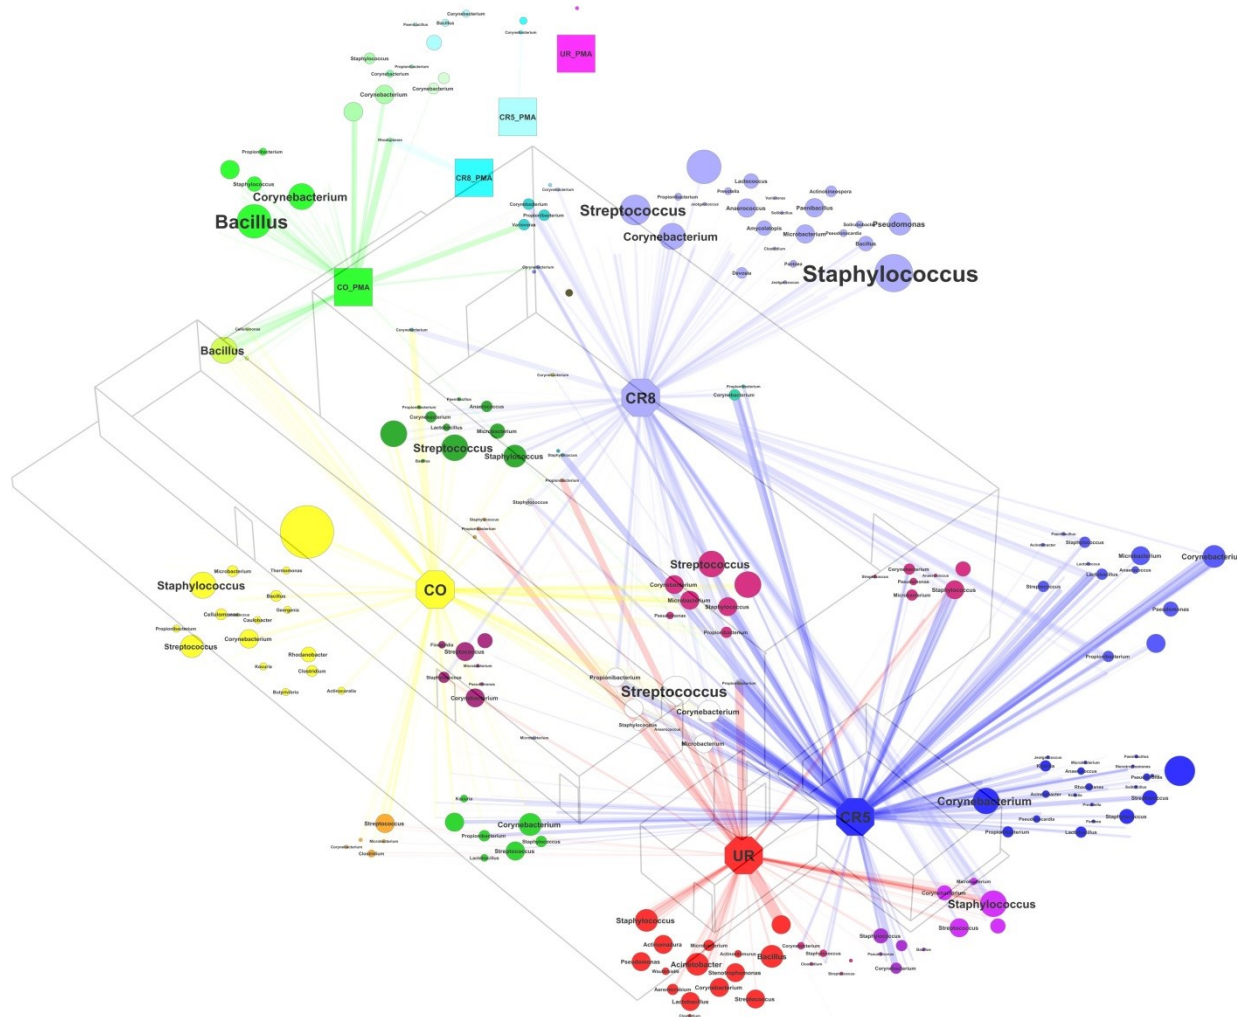

### Supplementary Fig. S3:

Layout of the integration center at Airbus Defence and Space GmbH in Friedrichshafen, Germany. Sampled rooms are highlighted in red and designated as follows: UR – changing room, CO – checkout room, CR8 – ISO 8 clean room, CR5 – ISO 5 clean room. Sample location were marked as follows: Circles in yellow represent BiSKit samples, which were used for molecular analysis (cloning – cOTUs, pyrotagsequencing – pOTUs, PhyloChip – rOTUs). Circles in green represent wipe samples, which were used for cultivation of oligotrophs and alkaliphiles. Circles in blue represent wipe samples, which were used for cultivation of halophiles. Overall 16 BiSKits, 16 wipes for bioburden analysis (not displayed), 32 wipes for alternative cultivation strategies and 10 field blanks (not displayed) were taken.

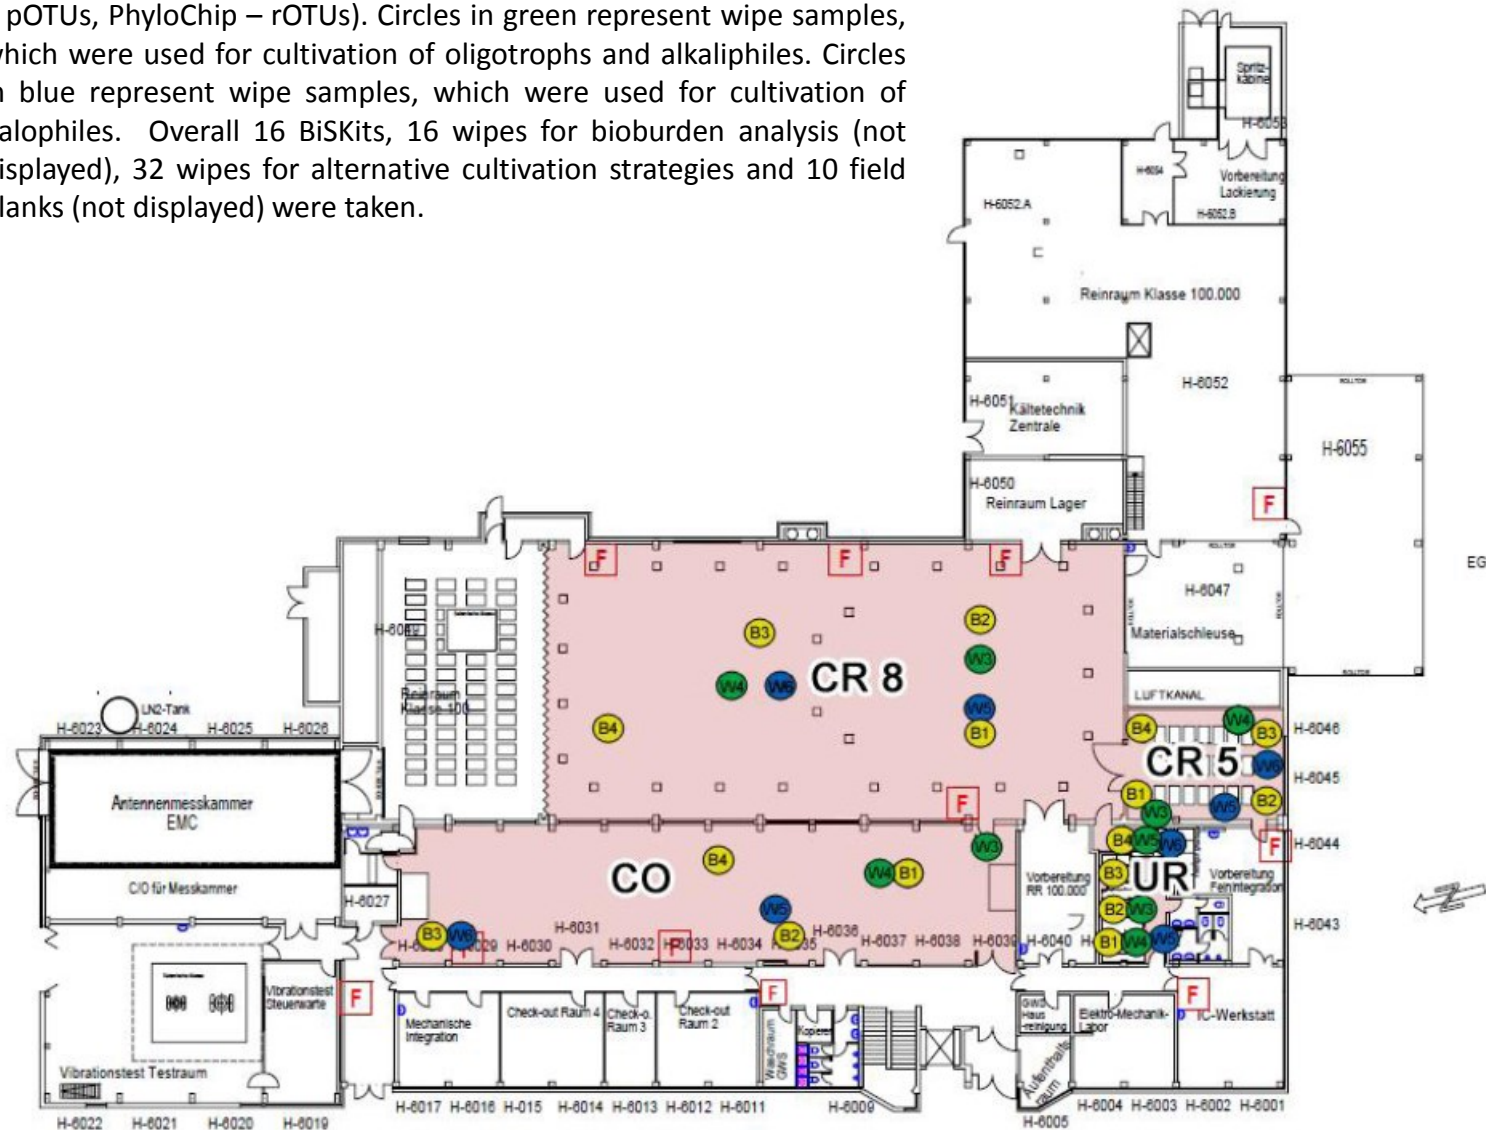

## **Supplementary Tables to:**

### **Quo vadis? Microbial profiling of vicinal office, changing and clean rooms reveal clearly different microbiomes and routes of contamination**

**Christine Moissl-Eichinger<sup>1\*†</sup>, Anna K Auerbach<sup>1†</sup>, Alexander J Probst<sup>1†</sup>, Alexander Mahnert<sup>2†</sup>, Lauren Tom<sup>3</sup>, Yvette Piceno<sup>3</sup>, Gary L Andersen<sup>3</sup>, Kasthuri Venkateswaran<sup>4</sup>, Petra Rettberg<sup>5</sup>, Simon Barczyk<sup>5</sup>, Rüdiger Pukall<sup>6</sup>, Gabriele Berg<sup>2</sup>**

<sup>1</sup>Institute for Microbiology and Archaea Center, University of Regensburg, Universitaetsstrasse 31, 93053 Regensburg, Germany

<sup>2</sup> Institute of Environmental Biotechnology, Graz University of Technology, Petersgasse 12/I, 8010 Graz, Austria

<sup>3</sup> Lawrence Berkeley National Laboratory, Earth Sciences Division, 1 Cyclotron Rd., Berkeley, CA 94720, USA

<sup>4</sup> Jet Propulsion Laboratory, 4800 Oak Grove Drive, Pasadena, CA 91109, USA

<sup>5</sup> German Aerospace Center, Institute of Aerospace Medicine and Radiation Biology, Linder Höhe, 51147 Köln, Germany

<sup>6</sup> Leibniz Institute DSMZ - Deutsche Sammlung von Mikroorganismen und Zellkulturen GmbH, Inhoffenstraße 7 B, 38124 Braunschweig, Germany

Table S1: Colony forming units (CFUs) obtained from wipe samples (alternative cultivation with respect to oligotrophs and alkaliphiles). Sd: standard deviation. Rsd: relative standard deviation.

|             | Oligotrophs         |      |         |        |       |      |            |        |      |             |                     | pH10 |         |             |             |      |            |       |      |  |  |  |  |  |
|-------------|---------------------|------|---------|--------|-------|------|------------|--------|------|-------------|---------------------|------|---------|-------------|-------------|------|------------|-------|------|--|--|--|--|--|
| CO          | technical replicate | CFUs | CFU/m^2 | mean   | sd    | rsd  | total mean | sd     | rsd  | CO          | technical replicate | CFUs | CFU/m^2 | mean        | sd          | rsd  | total mean | sd    | rsd  |  |  |  |  |  |
| Wipe CO_W3  | CO_W3a              | 4    | 644     | 5.80   | 4.31  | 0.74 | 20.90      | 17.36  | 0.83 | Wipe CO_W3  | CO_W3a              | 0    | 0       | 0           | 0           | 5.50 | 5.55       | 1.01  |      |  |  |  |  |  |
|             | CO_W3b              | 2    |         |        |       |      |            |        |      |             | CO_W3b              | 0    |         |             |             |      |            |       |      |  |  |  |  |  |
|             | CO_W3c              | 3    |         |        |       |      |            |        |      |             | CO_W3c              | 0    |         |             |             |      |            |       |      |  |  |  |  |  |
|             | CO_W3d              | 6    |         |        |       |      |            |        |      |             | CO_W3d              | 0    |         |             |             |      |            |       |      |  |  |  |  |  |
|             | CO_W3e              | 14   |         |        |       |      |            |        |      |             | CO_W3e              | 0    |         |             |             |      |            |       |      |  |  |  |  |  |
| Wipe CO_W4  | CO_W4a              | 26   | 4000    | 36.00  | 11.31 | 0.31 |            |        |      | CO_W4a      | 12                  | 1222 | 11      | 1.095445115 | 0.10        |      |            |       |      |  |  |  |  |  |
|             | CO_W4b              | 47   |         |        |       |      |            |        |      |             | CO_W4b              |      |         |             |             |      |            |       | 11   |  |  |  |  |  |
|             | CO_W4c              | 45   |         |        |       |      |            |        |      |             | CO_W4c              |      |         |             |             |      |            |       | 12   |  |  |  |  |  |
|             | CO_W4d              | 19   |         |        |       |      |            |        |      |             | CO_W4d              |      |         |             |             |      |            |       | 11   |  |  |  |  |  |
|             | CO_W4e              | 43   |         |        |       |      |            |        |      |             | CO_W4e              |      |         |             |             |      |            |       | 9    |  |  |  |  |  |
| UR          | technical replicate | CFUs | CFU/m^2 | mean   | sd    | rsd  | total mean | sd     | rsd  | UR          | technical replicate | CFUs | CFU/m^2 | mean        | sd          | rsd  | total mean | sd    | rsd  |  |  |  |  |  |
| Wipe UR_W3  | UR_W3a              | 67   | 10422   | 93.80  | 23.86 | 0.25 | 154.50     | 63.25  | 0.41 | Wipe UR_W3  | UR_W3a              | 24   | 3022    | 27.2        | 5.035871325 | 0.19 | 16.70      | 11.35 | 0.68 |  |  |  |  |  |
|             | UR_W3b              | 76   |         |        |       |      |            |        |      |             | UR_W3b              | 36   |         |             |             |      |            |       |      |  |  |  |  |  |
|             | UR_W3c              | 81   |         |        |       |      |            |        |      |             | UR_W3c              | 28   |         |             |             |      |            |       |      |  |  |  |  |  |
|             | UR_W3d              | 122  |         |        |       |      |            |        |      |             | UR_W3d              | 27   |         |             |             |      |            |       |      |  |  |  |  |  |
|             | UR_W3e              | 123  |         |        |       |      |            |        |      |             | UR_W3e              | 21   |         |             |             |      |            |       |      |  |  |  |  |  |
| Wipe UR_W4  | UR_W4a              | 208  | 23911   | 215.20 | 7.98  | 0.04 |            |        |      | UR_W4a      | 6                   | 689  | 6.2     | 3.42928564  | 0.55        |      |            |       |      |  |  |  |  |  |
|             | UR_W4b              | 214  |         |        |       |      |            |        |      |             | UR_W4b              |      |         |             |             | 9    |            |       |      |  |  |  |  |  |
|             | UR_W4c              | 229  |         |        |       |      |            |        |      |             | UR_W4c              |      |         |             |             | 11   |            |       |      |  |  |  |  |  |
|             | UR_W4d              | 207  |         |        |       |      |            |        |      |             | UR_W4d              |      |         |             |             | 3    |            |       |      |  |  |  |  |  |
|             | UR_W4e              | 218  |         |        |       |      |            |        |      |             | UR_W4e              |      |         |             |             | 2    |            |       |      |  |  |  |  |  |
| CR8         | technical replicate | CFUs | CFU/m^2 | mean   | sd    | rsd  | total mean | sd     | rsd  | CR8         | technical replicate | CFUs | CFU/m^2 | mean        | sd          | rsd  | total mean | sd    | rsd  |  |  |  |  |  |
| Wipe CR8_W3 | CR8_W3a             | 1    | 133     | 1.20   | 0.75  | 0.62 | 149.70     | 161.06 | 1.08 | Wipe CR8_W3 | CR8_W3a             | 0    | 0       | 0           | 0           | 0.00 | 0.00       |       |      |  |  |  |  |  |
|             | CR8_W3b             | 0    |         |        |       |      |            |        |      |             | CR8_W3b             | 0    |         |             |             |      |            |       |      |  |  |  |  |  |
|             | CR8_W3c             | 2    |         |        |       |      |            |        |      |             | CR8_W3c             | 0    |         |             |             |      |            |       |      |  |  |  |  |  |
|             | CR8_W3d             | 2    |         |        |       |      |            |        |      |             | CR8_W3d             | 0    |         |             |             |      |            |       |      |  |  |  |  |  |
|             | CR8_W3e             | 1    |         |        |       |      |            |        |      |             | CR8_W3e             | 0    |         |             |             |      |            |       |      |  |  |  |  |  |
| Wipe CR8_W4 | CR8_W4a             | 353  | 33133   | 298.20 | 88.18 | 0.30 |            |        |      | CR8_W4a     | 0                   | 0    | 0       | 0           |             |      |            |       |      |  |  |  |  |  |
|             | CR8_W4b             | 227  |         |        |       |      |            |        |      |             | CR8_W4b             |      |         |             | 0           |      |            |       |      |  |  |  |  |  |
|             | CR8_W4c             | 437  |         |        |       |      |            |        |      |             | CR8_W4c             |      |         |             | 0           |      |            |       |      |  |  |  |  |  |
|             | CR8_W4d             | 282  |         |        |       |      |            |        |      |             | CR8_W4d             |      |         |             | 0           |      |            |       |      |  |  |  |  |  |
|             | CR8_W4e             | 192  |         |        |       |      |            |        |      |             | CR8_W4e             |      |         |             | 0           |      |            |       |      |  |  |  |  |  |
| CR5         | technical replicate | CFUs | CFU/m^2 | mean   | sd    | rsd  | total mean | sd     | rsd  | CR5         | technical replicate | CFUs | CFU/m^2 | mean        | sd          | rsd  | total mean | sd    | rsd  |  |  |  |  |  |
| Wipe CR5_W3 | CR5_W3a             | 0    | 44      | 0.40   | 0.80  | 2.00 | 3.50       | 4.32   | 1.23 | Wipe CR5_W3 | CR5_W3a             | 0    | 0       | 0           | 0           | 0.40 | 0.80       | 2.00  |      |  |  |  |  |  |
|             | CR5_W3b             | 2    |         |        |       |      |            |        |      |             | CR5_W3b             | 0    |         |             |             |      |            |       |      |  |  |  |  |  |
|             | CR5_W3c             | 0    |         |        |       |      |            |        |      |             | CR5_W3c             | 0    |         |             |             |      |            |       |      |  |  |  |  |  |
|             | CR5_W3d             | 0    |         |        |       |      |            |        |      |             | CR5_W3d             | 0    |         |             |             |      |            |       |      |  |  |  |  |  |
|             | CR5_W3e             | 0    |         |        |       |      |            |        |      |             | CR5_W3e             | 0    |         |             |             |      |            |       |      |  |  |  |  |  |
| Wipe CR5_W4 | CR5_W4a             | 13   | 733     | 6.60   | 4.18  | 0.63 |            |        |      | CR5_W4a     | 0                   | 89   | 0.8     | 0.979795897 | 1.22        |      |            |       |      |  |  |  |  |  |
|             | CR5_W4b             | 2    |         |        |       |      |            |        |      |             | CR5_W4b             |      |         |             |             |      |            |       | 2    |  |  |  |  |  |
|             | CR5_W4c             | 2    |         |        |       |      |            |        |      |             | CR5_W4c             |      |         |             |             |      |            |       | 2    |  |  |  |  |  |
|             | CR5_W4d             | 8    |         |        |       |      |            |        |      |             | CR5_W4d             |      |         |             |             |      |            |       | 0    |  |  |  |  |  |
|             | CR5_W4e             | 8    |         |        |       |      |            |        |      |             | CR5_W4e             |      |         |             |             |      |            |       | 0    |  |  |  |  |  |



|                                                                                              |             |             |           |           |                 |                 |               |               |           |
|----------------------------------------------------------------------------------------------|-------------|-------------|-----------|-----------|-----------------|-----------------|---------------|---------------|-----------|
| Table S3: Number of clones processed from each sample, number of singular OTUs and coverage. |             |             |           |           |                 |                 |               |               |           |
|                                                                                              |             |             |           |           |                 |                 |               |               |           |
| <b>sample</b>                                                                                | <b>CR 5</b> | <b>CR 8</b> | <b>CO</b> | <b>UR</b> | <b>CR 5-PMA</b> | <b>CR 8-PMA</b> | <b>CO-PMA</b> | <b>UR-PMA</b> | <b>EB</b> |
| <b>No. of clones picked</b>                                                                  | 144         | 168         | 96        | 96        | 48              | 48              | 48            | 48            | 96        |
| <b>Chimera</b>                                                                               | 9           | 12          | 15        | 16        | 0               | 0               | 0             | 0             | 0         |
| <b>No. of clones processed after quality filtering</b>                                       | 80          | 71          | 52        | 51        | 43              | 47              | 44            | 45            | 86        |
| <b>No. of singular OTUs</b>                                                                  | 25          | 30          | 27        | 22        | 1               | 1               | 5             | 8             | 4         |
| <b>Coverage</b>                                                                              | 0.69        | 0.58        | 0.48      | 0.57      | 0.98            | 0.98            | 0.87          | 0.82          | 0.95      |

Table S4 (part A): Accession numbers, abundance and taxonomic affiliation of detected bacterial 16S rRNA genes by classical gene cloning of samples from different locations, with or without PMA treatment

| Acc. No. | samples |    |     |     | samples, PMA treated |        |         |         | taxonomic classification of bacterial 16S rRNA genes |                   |                    |                       |                    |
|----------|---------|----|-----|-----|----------------------|--------|---------|---------|------------------------------------------------------|-------------------|--------------------|-----------------------|--------------------|
|          | UR      | CO | CR8 | CR5 | UR_PMA               | CO_PMA | CR8_PMA | CR5_PMA | phylum                                               | class             | order              | family                | genus              |
| JQ855629 | 0       | 1  | 0   | 0   | 0                    | 0      | 0       | 0       | Actinobacteria                                       | Actinobacteria    | Acidimicrobiales   | CL500-29              | unclassified       |
| JQ855568 | 2       | 0  | 0   | 0   | 0                    | 0      | 0       | 0       | Actinobacteria                                       | Actinobacteria    | Actinomycetales    | Brevibacteriaceae     | Brevibacterium     |
| JQ855550 | 0       | 0  | 1   | 0   | 0                    | 0      | 0       | 0       | Actinobacteria                                       | Actinobacteria    | Actinomycetales    | Cellulomonadaceae     | Actinotalea        |
| JQ855601 | 0       | 1  | 0   | 0   | 0                    | 0      | 0       | 0       | Actinobacteria                                       | Actinobacteria    | Actinomycetales    | Cellulomonadaceae     | Demequina          |
| JQ855613 | 0       | 2  | 0   | 1   | 0                    | 0      | 0       | 0       | Actinobacteria                                       | Actinobacteria    | Actinomycetales    | Cellulomonadaceae     | unclassified       |
| JQ855529 | 0       | 1  | 0   | 4   | 0                    | 0      | 0       | 0       | Actinobacteria                                       | Actinobacteria    | Actinomycetales    | Corynebacteriaceae    | Corynebacterium    |
| JQ855530 | 0       | 0  | 0   | 2   | 0                    | 0      | 0       | 0       | Actinobacteria                                       | Actinobacteria    | Actinomycetales    | Corynebacteriaceae    | Corynebacterium    |
| JQ855541 | 1       | 1  | 0   | 0   | 0                    | 0      | 0       | 0       | Actinobacteria                                       | Actinobacteria    | Actinomycetales    | Corynebacteriaceae    | Corynebacterium    |
| JQ855545 | 0       | 3  | 0   | 1   | 0                    | 0      | 0       | 0       | Actinobacteria                                       | Actinobacteria    | Actinomycetales    | Corynebacteriaceae    | Corynebacterium    |
| JQ855561 | 0       | 0  | 2   | 10  | 0                    | 0      | 0       | 0       | Actinobacteria                                       | Actinobacteria    | Actinomycetales    | Corynebacteriaceae    | Corynebacterium    |
| JQ855563 | 0       | 0  | 1   | 0   | 0                    | 0      | 0       | 1       | Actinobacteria                                       | Actinobacteria    | Actinomycetales    | Corynebacteriaceae    | Corynebacterium    |
| JQ855564 | 0       | 0  | 0   | 1   | 0                    | 0      | 0       | 0       | Actinobacteria                                       | Actinobacteria    | Actinomycetales    | Corynebacteriaceae    | Corynebacterium    |
| JQ855592 | 0       | 1  | 0   | 0   | 0                    | 0      | 0       | 0       | Actinobacteria                                       | Actinobacteria    | Actinomycetales    | Corynebacteriaceae    | Corynebacterium    |
| JQ855600 | 0       | 0  | 0   | 6   | 1                    | 0      | 0       | 0       | Actinobacteria                                       | Actinobacteria    | Actinomycetales    | Corynebacteriaceae    | Corynebacterium    |
| JQ855608 | 0       | 0  | 0   | 1   | 0                    | 0      | 0       | 0       | Actinobacteria                                       | Actinobacteria    | Actinomycetales    | Corynebacteriaceae    | Corynebacterium    |
| JQ855609 | 0       | 0  | 0   | 1   | 0                    | 0      | 0       | 0       | Actinobacteria                                       | Actinobacteria    | Actinomycetales    | Corynebacteriaceae    | Corynebacterium    |
| JQ855614 | 0       | 1  | 0   | 0   | 0                    | 0      | 0       | 0       | Actinobacteria                                       | Actinobacteria    | Actinomycetales    | Corynebacteriaceae    | Corynebacterium    |
| JQ855615 | 0       | 0  | 1   | 0   | 0                    | 0      | 0       | 0       | Actinobacteria                                       | Actinobacteria    | Actinomycetales    | Corynebacteriaceae    | Corynebacterium    |
| JQ855619 | 0       | 0  | 1   | 0   | 0                    | 0      | 0       | 0       | Actinobacteria                                       | Actinobacteria    | Actinomycetales    | Corynebacteriaceae    | Corynebacterium    |
| JQ855620 | 0       | 1  | 0   | 2   | 0                    | 0      | 0       | 0       | Actinobacteria                                       | Actinobacteria    | Actinomycetales    | Corynebacteriaceae    | Corynebacterium    |
| JQ855622 | 0       | 0  | 0   | 10  | 0                    | 0      | 0       | 0       | Actinobacteria                                       | Actinobacteria    | Actinomycetales    | Corynebacteriaceae    | Corynebacterium    |
| JQ855630 | 0       | 0  | 0   | 1   | 0                    | 0      | 0       | 0       | Actinobacteria                                       | Actinobacteria    | Actinomycetales    | Corynebacteriaceae    | Corynebacterium    |
| JQ855560 | 1       | 0  | 0   | 0   | 0                    | 0      | 0       | 0       | Actinobacteria                                       | Actinobacteria    | Actinomycetales    | Dermabacteraceae      | Brachybacterium    |
| JQ855531 | 0       | 0  | 1   | 4   | 0                    | 0      | 0       | 0       | Actinobacteria                                       | Actinobacteria    | Actinomycetales    | Dermabacteraceae      | Dermabacter        |
| JQ855548 | 0       | 2  | 0   | 0   | 0                    | 0      | 0       | 0       | Actinobacteria                                       | Actinobacteria    | Actinomycetales    | Intrasporangiaceae    | unclassified       |
| JQ855599 | 0       | 1  | 0   | 0   | 0                    | 0      | 0       | 0       | Actinobacteria                                       | Actinobacteria    | Actinomycetales    | Intrasporangiaceae    | unclassified       |
| JQ855611 | 0       | 1  | 0   | 0   | 0                    | 0      | 0       | 0       | Actinobacteria                                       | Actinobacteria    | Actinomycetales    | Intrasporangiaceae    | unclassified       |
| JQ855596 | 0       | 0  | 0   | 1   | 0                    | 0      | 0       | 0       | Actinobacteria                                       | Actinobacteria    | Actinomycetales    | Kineosporiaceae       | unclassified       |
| JQ855570 | 0       | 0  | 1   | 0   | 0                    | 0      | 0       | 0       | Actinobacteria                                       | Actinobacteria    | Actinomycetales    | Microbacteriaceae     | Agreia             |
| JQ855583 | 0       | 0  | 0   | 0   | 1                    | 0      | 0       | 0       | Actinobacteria                                       | Actinobacteria    | Actinomycetales    | Microbacteriaceae     | Microbacterium     |
| JQ855626 | 0       | 0  | 0   | 1   | 0                    | 0      | 0       | 0       | Actinobacteria                                       | Actinobacteria    | Actinomycetales    | Microbacteriaceae     | Microbacterium     |
| JQ855593 | 0       | 0  | 1   | 0   | 0                    | 0      | 0       | 0       | Actinobacteria                                       | Actinobacteria    | Actinomycetales    | Microbacteriaceae     | Rathayibacter      |
| JQ855576 | 1       | 0  | 0   | 0   | 0                    | 0      | 0       | 0       | Actinobacteria                                       | Actinobacteria    | Actinomycetales    | Micrococcaceae        | Kocuria            |
| JQ855632 | 1       | 0  | 0   | 1   | 0                    | 0      | 0       | 0       | Actinobacteria                                       | Actinobacteria    | Actinomycetales    | Micrococcaceae        | Kocuria            |
| JQ855612 | 0       | 0  | 1   | 0   | 0                    | 0      | 0       | 0       | Actinobacteria                                       | Actinobacteria    | Actinomycetales    | Micrococcaceae        | Micrococcus        |
| JQ855635 | 3       | 0  | 2   | 1   | 0                    | 0      | 0       | 0       | Actinobacteria                                       | Actinobacteria    | Actinomycetales    | Micrococcaceae        | Micrococcus        |
| JQ855509 | 0       | 1  | 1   | 0   | 0                    | 0      | 0       | 0       | Actinobacteria                                       | Actinobacteria    | Actinomycetales    | Nocardiodiaceae       | Friedmanniella     |
| JQ855597 | 0       | 0  | 0   | 1   | 0                    | 0      | 0       | 0       | Actinobacteria                                       | Actinobacteria    | Actinomycetales    | Nocardiodiaceae       | Friedmanniella     |
| JQ855617 | 0       | 1  | 0   | 0   | 0                    | 0      | 0       | 0       | Actinobacteria                                       | Actinobacteria    | Actinomycetales    | Nocardiodiaceae       | Friedmanniella     |
| JQ855551 | 1       | 0  | 0   | 0   | 0                    | 0      | 0       | 0       | Actinobacteria                                       | Actinobacteria    | Actinomycetales    | Nocardiodiaceae       | Marmoricola        |
| JQ855536 | 0       | 0  | 1   | 0   | 0                    | 0      | 0       | 0       | Actinobacteria                                       | Actinobacteria    | Actinomycetales    | Nocardiodiaceae       | Nocardioides       |
| JQ855565 | 0       | 0  | 1   | 0   | 0                    | 0      | 0       | 0       | Actinobacteria                                       | Actinobacteria    | Actinomycetales    | Nocardiodiaceae       | Nocardioides       |
| JQ855587 | 0       | 0  | 0   | 0   | 0                    | 1      | 0       | 0       | Actinobacteria                                       | Actinobacteria    | Actinomycetales    | Nocardiodiaceae       | Propionicimonas    |
| JQ855532 | 0       | 0  | 1   | 0   | 0                    | 0      | 0       | 0       | Actinobacteria                                       | Actinobacteria    | Actinomycetales    | Nocardiodiaceae       | unclassified       |
| JQ855578 | 0       | 1  | 0   | 0   | 0                    | 0      | 0       | 0       | Actinobacteria                                       | Actinobacteria    | Actinomycetales    | Nocardiodiaceae       | unclassified       |
| JQ855633 | 0       | 0  | 0   | 1   | 0                    | 0      | 0       | 0       | Actinobacteria                                       | Actinobacteria    | Actinomycetales    | Nocardiodiaceae       | unclassified       |
| JQ855579 | 0       | 0  | 1   | 0   | 0                    | 0      | 0       | 0       | Actinobacteria                                       | Actinobacteria    | Actinomycetales    | Promicromonosporaceae | Cellulosimicrobium |
| JQ855605 | 0       | 3  | 0   | 0   | 0                    | 0      | 0       | 0       | Actinobacteria                                       | Actinobacteria    | Actinomycetales    | Propionibacteriaceae  | Micrococcus        |
| JQ855520 | 0       | 0  | 2   | 0   | 0                    | 0      | 0       | 0       | Actinobacteria                                       | Actinobacteria    | Actinomycetales    | Propionibacteriaceae  | Propionibacterium  |
| JQ855543 | 5       | 2  | 12  | 4   | 2                    | 0      | 0       | 0       | Actinobacteria                                       | Actinobacteria    | Actinomycetales    | Propionibacteriaceae  | Propionibacterium  |
| JQ855627 | 0       | 0  | 1   | 0   | 0                    | 0      | 0       | 0       | Actinobacteria                                       | Actinobacteria    | Actinomycetales    | Sanguibacteraceae     | Sanguibacter       |
| JQ855526 | 0       | 1  | 2   | 1   | 0                    | 0      | 0       | 0       | Actinobacteria                                       | Actinobacteria    | Actinomycetales    | unclassified          | unclassified       |
| JQ855590 | 1       | 0  | 0   | 0   | 0                    | 0      | 0       | 0       | Actinobacteria                                       | Actinobacteria    | Actinomycetales    | unclassified          | unclassified       |
| JQ855598 | 0       | 0  | 0   | 1   | 0                    | 0      | 0       | 0       | Actinobacteria                                       | Actinobacteria    | Actinomycetales    | unclassified          | unclassified       |
| JQ855604 | 0       | 0  | 0   | 1   | 0                    | 0      | 0       | 0       | Actinobacteria                                       | Actinobacteria    | Actinomycetales    | unclassified          | unclassified       |
| JQ855628 | 0       | 1  | 0   | 0   | 0                    | 0      | 0       | 0       | Actinobacteria                                       | Actinobacteria    | Actinomycetales    | unclassified          | unclassified       |
| JQ855562 | 1       | 0  | 0   | 0   | 0                    | 0      | 0       | 0       | Bacteroidetes                                        | Flavobacteria     | Flavobacteriales   | Cryomorphaceae        | unclassified       |
| JQ855621 | 1       | 0  | 0   | 0   | 0                    | 0      | 0       | 0       | Bacteroidetes                                        | Flavobacteria     | Flavobacteriales   | Flavobacteriaceae     | Chryseobacterium   |
| JQ855623 | 0       | 1  | 1   | 0   | 0                    | 0      | 0       | 0       | Bacteroidetes                                        | Flavobacteria     | Flavobacteriales   | Flavobacteriaceae     | Chryseobacterium   |
| JQ855555 | 0       | 1  | 0   | 2   | 0                    | 0      | 0       | 0       | Bacteroidetes                                        | Flavobacteria     | Flavobacteriales   | Flavobacteriaceae     | Flavobacterium     |
| JQ855616 | 0       | 0  | 2   | 0   | 0                    | 0      | 0       | 0       | Bacteroidetes                                        | Flavobacteria     | Flavobacteriales   | Flavobacteriaceae     | Flavobacterium     |
| JQ855534 | 0       | 0  | 1   | 1   | 0                    | 1      | 0       | 0       | Bacteroidetes                                        | Sphingobacteria   | Sphingobacteriales | Chitinophagaceae      | unclassified       |
| JQ855571 | 0       | 2  | 1   | 0   | 0                    | 0      | 0       | 0       | Cyanobacteria                                        | Oscillatoriothrix | Chroococcales      | Xenococcaceae         | Chroococcidiopsis  |
| JQ855573 | 0       | 2  | 2   | 0   | 0                    | 0      | 0       | 0       | Cyanobacteria                                        | Oscillatoriothrix | Chroococcales      | Xenococcaceae         | Chroococcidiopsis  |
| JQ855580 | 0       | 0  | 1   | 0   | 1                    | 0      | 0       | 0       | Cyanobacteria                                        | Oscillatoriothrix | Chroococcales      | Xenococcaceae         | Chroococcidiopsis  |
| JQ855618 | 0       | 0  | 0   | 1   | 0                    | 0      | 0       | 0       | Cyanobacteria                                        | Oscillatoriothrix | Chroococcales      | Xenococcaceae         | Chroococcidiopsis  |

Table S4 (part B): Accession numbers, abundance and taxonomic affiliation of detected bacterial 16S rRNA genes by classical gene cloning of samples from different locations, with or without PMA treatment

|          | samples |    |     |     | samples, PMA treated |        |         |         | taxonomic classification of bacterial 16S rRNA genes |                     |                  |                                    |                   |
|----------|---------|----|-----|-----|----------------------|--------|---------|---------|------------------------------------------------------|---------------------|------------------|------------------------------------|-------------------|
| Acc. No. | UR      | CO | CR8 | CR5 | UR_PMA               | CO_PMA | CR8_PMA | CR5_PMA | phylum                                               | class               | order            | family                             | genus             |
| JQ855558 | 0       | 2  | 0   | 0   | 0                    | 5      | 0       | 0       | Firmicutes                                           | Bacilli             | Bacillales       | Bacillaceae                        | Bacillus          |
| JQ855594 | 0       | 3  | 0   | 0   | 0                    | 0      | 0       | 0       | Firmicutes                                           | Bacilli             | Bacillales       | Bacillaceae                        | Bacillus          |
| JQ855634 | 0       | 1  | 0   | 0   | 0                    | 0      | 0       | 0       | Firmicutes                                           | Bacilli             | Bacillales       | Planococcaceae                     | Rummeliibacillus  |
| JQ855535 | 2       | 0  | 0   | 0   | 0                    | 0      | 0       | 0       | Firmicutes                                           | Bacilli             | Bacillales       | Staphylococcaceae                  | Jeotgalicoccus    |
| JQ855539 | 1       | 0  | 1   | 0   | 0                    | 0      | 0       | 0       | Firmicutes                                           | Bacilli             | Bacillales       | Staphylococcaceae                  | Jeotgalicoccus    |
| JQ855510 | 2       | 1  | 11  | 4   | 1                    | 0      | 1       | 0       | Firmicutes                                           | Bacilli             | Bacillales       | Staphylococcaceae                  | Staphylococcus    |
| JQ855511 | 1       | 0  | 0   | 0   | 0                    | 0      | 0       | 0       | Firmicutes                                           | Bacilli             | Bacillales       | Staphylococcaceae                  | Staphylococcus    |
| JQ855518 | 0       | 0  | 0   | 1   | 0                    | 0      | 0       | 0       | Firmicutes                                           | Bacilli             | Bacillales       | Staphylococcaceae                  | Staphylococcus    |
| JQ855553 | 1       | 0  | 0   | 0   | 0                    | 0      | 0       | 0       | Firmicutes                                           | Bacilli             | Bacillales       | Staphylococcaceae                  | Staphylococcus    |
| JQ855567 | 1       | 0  | 0   | 0   | 0                    | 0      | 0       | 0       | Firmicutes                                           | Bacilli             | Bacillales       | Staphylococcaceae                  | Staphylococcus    |
| JQ855610 | 0       | 0  | 1   | 0   | 0                    | 0      | 0       | 0       | Firmicutes                                           | Bacilli             | Bacillales       | Staphylococcaceae                  | Staphylococcus    |
| JQ855606 | 0       | 0  | 0   | 3   | 0                    | 0      | 0       | 0       | Firmicutes                                           | Bacilli             | Lactobacillales  | Aerococcaceae                      | unclassified      |
| JQ855544 | 1       | 0  | 0   | 0   | 0                    | 0      | 0       | 0       | Firmicutes                                           | Bacilli             | Lactobacillales  | Lactobacillaceae                   | Lactobacillus     |
| JQ855521 | 0       | 0  | 1   | 0   | 0                    | 0      | 0       | 0       | Firmicutes                                           | Bacilli             | Lactobacillales  | Streptococcaceae                   | Streptococcus     |
| JQ855522 | 1       | 0  | 0   | 2   | 1                    | 0      | 0       | 0       | Firmicutes                                           | Bacilli             | Lactobacillales  | Streptococcaceae                   | Streptococcus     |
| JQ855528 | 0       | 0  | 0   | 1   | 0                    | 0      | 0       | 0       | Firmicutes                                           | Bacilli             | Lactobacillales  | Streptococcaceae                   | Streptococcus     |
| JQ855572 | 0       | 0  | 1   | 0   | 0                    | 0      | 0       | 0       | Firmicutes                                           | Bacilli             | Lactobacillales  | Streptococcaceae                   | Streptococcus     |
| JQ855595 | 0       | 0  | 0   | 0   | 0                    | 2      | 0       | 0       | Firmicutes                                           | Clostridia          | Clostridiales    | Clostridiaceae                     | Clostridium       |
| JQ855538 | 0       | 2  | 0   | 2   | 0                    | 0      | 0       | 0       | Firmicutes                                           | Clostridia          | Clostridiales    | Clostridiales_Family_XI_Incertae_S | Anaerococcus      |
| JQ855631 | 0       | 0  | 2   | 0   | 0                    | 0      | 0       | 0       | Firmicutes                                           | Clostridia          | Clostridiales    | Clostridiales_Family_XI_Incertae_S | Finegoldia        |
| JQ855525 | 0       | 0  | 2   | 0   | 0                    | 0      | 0       | 0       | Firmicutes                                           | Clostridia          | Clostridiales    | Clostridiales_Family_XI_Incertae_S | Peptoniphilus     |
| JQ855527 | 0       | 0  | 0   | 0   | 0                    | 1      | 0       | 0       | Firmicutes                                           | Clostridia          | Clostridiales    | Clostridiales_Family_XI_Incertae_S | Tissierella       |
| JQ855537 | 0       | 1  | 0   | 0   | 0                    | 0      | 0       | 0       | Firmicutes                                           | Clostridia          | Clostridiales    | Clostridiales_Family_XI_Incertae_S | Tissierella       |
| JQ855584 | 0       | 0  | 0   | 0   | 1                    | 0      | 0       | 0       | Proteobacteria                                       | Alphaproteobacteria | Caulobacterales  | Caulobacteraceae                   | Brevundimonas     |
| JQ855588 | 0       | 1  | 0   | 0   | 0                    | 0      | 0       | 0       | Proteobacteria                                       | Alphaproteobacteria | Rhizobiales      | Phyllobacteriaceae                 | unclassified      |
| JQ855566 | 0       | 1  | 0   | 1   | 0                    | 0      | 0       | 0       | Proteobacteria                                       | Alphaproteobacteria | Rhizobiales      | Rhizobiaceae                       | Agrobacterium     |
| JQ855585 | 0       | 1  | 0   | 0   | 0                    | 0      | 0       | 0       | Proteobacteria                                       | Alphaproteobacteria | Rhodobacterales  | Rhodobacteraceae                   | Amaricoccus       |
| JQ855513 | 0       | 0  | 1   | 0   | 0                    | 0      | 0       | 0       | Proteobacteria                                       | Alphaproteobacteria | Rhodobacterales  | Rhodobacteraceae                   | Paracoccus        |
| JQ855559 | 0       | 1  | 0   | 0   | 0                    | 1      | 0       | 0       | Proteobacteria                                       | Alphaproteobacteria | Rhodobacterales  | Rhodobacteraceae                   | Paracoccus        |
| JQ855554 | 0       | 1  | 0   | 0   | 0                    | 0      | 0       | 0       | Proteobacteria                                       | Alphaproteobacteria | Rhodospirillales | Acetobacteraceae                   | unclassified      |
| JQ855625 | 0       | 2  | 0   | 0   | 0                    | 0      | 0       | 0       | Proteobacteria                                       | Alphaproteobacteria | Sphingomonadale  | Sphingomonadaceae                  | Sphingobium       |
| JQ855517 | 0       | 0  | 1   | 0   | 0                    | 0      | 0       | 0       | Proteobacteria                                       | Alphaproteobacteria | Sphingomonadale  | Sphingomonadaceae                  | Sphingomonas      |
| JQ855577 | 0       | 0  | 0   | 1   | 0                    | 0      | 0       | 0       | Proteobacteria                                       | Alphaproteobacteria | Sphingomonadale  | Sphingomonadaceae                  | Sphingomonas      |
| JQ855586 | 0       | 1  | 0   | 0   | 0                    | 0      | 0       | 0       | Proteobacteria                                       | Alphaproteobacteria | Sphingomonadale  | Sphingomonadaceae                  | Sphingomonas      |
| JQ855542 | 0       | 0  | 0   | 0   | 1                    | 0      | 0       | 0       | Proteobacteria                                       | Betaproteobacteria  | Burkholderiales  | Burkholderiaceae                   | Ralstonia         |
| JQ855582 | 1       | 0  | 0   | 0   | 0                    | 0      | 0       | 0       | Proteobacteria                                       | Betaproteobacteria  | Burkholderiales  | Comamonadaceae                     | Acidovorax        |
| JQ855552 | 1       | 0  | 0   | 0   | 0                    | 0      | 0       | 0       | Proteobacteria                                       | Betaproteobacteria  | Burkholderiales  | Comamonadaceae                     | Variovorax        |
| JQ855512 | 1       | 0  | 0   | 1   | 0                    | 0      | 0       | 0       | Proteobacteria                                       | Betaproteobacteria  | Burkholderiales  | Oxalobacteraceae                   | Massilia          |
| JQ855575 | 6       | 0  | 0   | 0   | 0                    | 0      | 0       | 0       | Proteobacteria                                       | Betaproteobacteria  | Burkholderiales  | Oxalobacteraceae                   | Massilia          |
| JQ855581 | 1       | 0  | 0   | 0   | 0                    | 0      | 0       | 0       | Proteobacteria                                       | Betaproteobacteria  | Burkholderiales  | Oxalobacteraceae                   | Massilia          |
| JQ855624 | 0       | 0  | 2   | 0   | 0                    | 0      | 0       | 0       | Proteobacteria                                       | Betaproteobacteria  | Burkholderiales  | Oxalobacteraceae                   | Massilia          |
| JQ855540 | 1       | 0  | 1   | 0   | 0                    | 1      | 0       | 0       | Proteobacteria                                       | Deltaproteobacteria | Myxococcales     | unclassified                       | unclassified      |
| JQ855549 | 2       | 0  | 0   | 0   | 0                    | 0      | 0       | 0       | Proteobacteria                                       | Gammaproteobacteria | Legionellales    | Coxiellaceae                       | Rickettsiella     |
| JQ855556 | 7       | 0  | 0   | 0   | 9                    | 0      | 0       | 0       | Proteobacteria                                       | Gammaproteobacteria | Legionellales    | Coxiellaceae                       | Rickettsiella     |
| JQ855569 | 1       | 0  | 0   | 0   | 0                    | 0      | 0       | 0       | Proteobacteria                                       | Gammaproteobacteria | Legionellales    | Coxiellaceae                       | Rickettsiella     |
| JQ855591 | 0       | 0  | 0   | 0   | 1                    | 0      | 0       | 0       | Proteobacteria                                       | Gammaproteobacteria | Legionellales    | Coxiellaceae                       | Rickettsiella     |
| JQ855547 | 1       | 0  | 0   | 0   | 0                    | 0      | 0       | 0       | Proteobacteria                                       | Gammaproteobacteria | Pseudomonadales  | Moraxellaceae                      | Acinetobacter     |
| JQ855603 | 1       | 0  | 0   | 0   | 0                    | 0      | 0       | 0       | Proteobacteria                                       | Gammaproteobacteria | Pseudomonadales  | Moraxellaceae                      | Acinetobacter     |
| JQ855546 | 0       | 1  | 0   | 0   | 0                    | 0      | 0       | 0       | Proteobacteria                                       | Gammaproteobacteria | Xanthomonadales  | Xanthomonadaceae                   | Lysobacter        |
| JQ855589 | 0       | 0  | 1   | 0   | 0                    | 0      | 0       | 0       | Proteobacteria                                       | Gammaproteobacteria | Xanthomonadales  | Xanthomonadaceae                   | Pseudoxanthomonas |
| JQ855533 | 0       | 0  | 1   | 0   | 0                    | 0      | 0       | 0       | SC4                                                  | unclassified        | unclassified     | unclassified                       | unclassified      |
| JQ855514 | 0       | 0  | 0   | 1   | 0                    | 0      | 0       | 0       | Thermi                                               | Deinococci          | Deinococcales    | Deinococcaceae                     | Deinococcus       |
| JQ855607 | 0       | 0  | 1   | 0   | 0                    | 0      | 0       | 0       | Verrucomicrobi                                       | Verrucomicrobiae    | Verrucomicrobiae | Verrucomicrobiaceae                | Luteolibacter     |
|          | 51      | 51 | 69  | 78  | 19                   | 12     | 1       | 1       |                                                      |                     |                  |                                    |                   |

Table S5 (part A): OTUs, no. of reads and corresponding taxonomic affiliation of detected bacterial 16S rRNA amplicons by 454 pyrotag sequencing. Please note, the data shown here were either rank normalized or sum normalized (to 5000 reads per sample) before performing statistical analysis as depicted in the manuscript.

| Samples and no. of reads |    |    |    |     |                |                    | taxonomic classification of bacterial 16S rRNA gene amplicons |                      |                       |  |  |  |  |
|--------------------------|----|----|----|-----|----------------|--------------------|---------------------------------------------------------------|----------------------|-----------------------|--|--|--|--|
| OTU                      | UR | CO | CR | CRS | phylum         | class              | order                                                         | family               | genus                 |  |  |  |  |
| 50                       | 0  | 1  | 0  | 2   | Acidobacteria  | Acidobacteriales   | Acidobacteriales                                              | Acidobacteriaceae    | unclassified          |  |  |  |  |
| 176                      | 0  | 0  | 2  | 0   | Acidobacteria  | Solibacteres       | Solibacteres                                                  | Solibacteraceae      | Candidatus_Solibacter |  |  |  |  |
| 204                      | 2  | 0  | 0  | 0   | Acidobacteria  | Chloracidobacteria | unclassified                                                  | unclassified         | unclassified          |  |  |  |  |
| 258                      | 0  | 0  | 1  | 0   | Acidobacteria  | Acidobacteriales   | Acidobacteriales                                              | Acidobacteriaceae    | unclassified          |  |  |  |  |
| 302                      | 0  | 0  | 0  | 0   | Acidobacteria  | Solibacteres       | Solibacteres                                                  | Solibacteraceae      | Candidatus_Solibacter |  |  |  |  |
| 343                      | 1  | 1  | 0  | 2   | Acidobacteria  | Chloracidobacteria | unclassified                                                  | unclassified         | unclassified          |  |  |  |  |
| 367                      | 0  | 0  | 1  | 0   | Acidobacteria  | Chloracidobacteria | unclassified                                                  | unclassified         | unclassified          |  |  |  |  |
| 390                      | 0  | 1  | 1  | 0   | Acidobacteria  | Chloracidobacteria | unclassified                                                  | unclassified         | unclassified          |  |  |  |  |
| 397                      | 1  | 0  | 0  | 0   | Acidobacteria  | Sva0725            | Sva0725                                                       | unclassified         | unclassified          |  |  |  |  |
| 409                      | 0  | 0  | 3  | 0   | Acidobacteria  | Solibacteres       | Solibacteres                                                  | Solibacteraceae      | Candidatus_Solibacter |  |  |  |  |
| 419                      | 0  | 1  | 0  | 0   | Acidobacteria  | Chloracidobacteria | unclassified                                                  | unclassified         | unclassified          |  |  |  |  |
| 510                      | 0  | 0  | 1  | 0   | Acidobacteria  | Solibacteres       | Solibacteres                                                  | Solibacteraceae      | Candidatus_Solibacter |  |  |  |  |
| 520                      | 0  | 0  | 6  | 0   | Acidobacteria  | iii-8              | DS-18                                                         | unclassified         | unclassified          |  |  |  |  |
| 541                      | 0  | 1  | 0  | 1   | Acidobacteria  | Acidobacteriales   | Acidobacteriales                                              | Acidobacteriaceae    | unclassified          |  |  |  |  |
| 581                      | 0  | 1  | 0  | 1   | Acidobacteria  | Chloracidobacteria | unclassified                                                  | unclassified         | unclassified          |  |  |  |  |
| 617                      | 0  | 2  | 0  | 0   | Acidobacteria  | Solibacteres       | Solibacteres                                                  | Solibacteraceae      | Candidatus_Solibacter |  |  |  |  |
| 620                      | 0  | 0  | 1  | 0   | Acidobacteria  | Solibacteres       | Solibacteres                                                  | Solibacteraceae      | Candidatus_Solibacter |  |  |  |  |
| 645                      | 0  | 1  | 2  | 0   | Acidobacteria  | Solibacteres       | Solibacteres                                                  | Solibacteraceae      | Candidatus_Solibacter |  |  |  |  |
| 706                      | 0  | 0  | 0  | 1   | Acidobacteria  | Chloracidobacteria | unclassified                                                  | unclassified         | unclassified          |  |  |  |  |
| 725                      | 0  | 2  | 0  | 0   | Acidobacteria  | Chloracidobacteria | unclassified                                                  | unclassified         | unclassified          |  |  |  |  |
| 731                      | 1  | 0  | 0  | 0   | Acidobacteria  | Chloracidobacteria | unclassified                                                  | unclassified         | unclassified          |  |  |  |  |
| 732                      | 1  | 2  | 0  | 0   | Acidobacteria  | Chloracidobacteria | unclassified                                                  | unclassified         | unclassified          |  |  |  |  |
| 735                      | 0  | 1  | 0  | 0   | Acidobacteria  | Chloracidobacteria | unclassified                                                  | unclassified         | unclassified          |  |  |  |  |
| 771                      | 1  | 1  | 0  | 0   | Acidobacteria  | Chloracidobacteria | unclassified                                                  | unclassified         | unclassified          |  |  |  |  |
| 785                      | 0  | 1  | 0  | 0   | Acidobacteria  | Chloracidobacteria | unclassified                                                  | unclassified         | unclassified          |  |  |  |  |
| 815                      | 0  | 0  | 0  | 0   | Acidobacteria  | Solibacteres       | Solibacteres                                                  | Solibacteraceae      | Candidatus_Solibacter |  |  |  |  |
| 836                      | 2  | 1  | 0  | 0   | Acidobacteria  | Solibacteres       | Solibacteres                                                  | Solibacteraceae      | Candidatus_Solibacter |  |  |  |  |
| 857                      | 0  | 1  | 0  | 1   | Acidobacteria  | Solibacteres       | Solibacteres                                                  | Solibacteraceae      | Candidatus_Solibacter |  |  |  |  |
| 873                      | 0  | 0  | 0  | 3   | Acidobacteria  | Solibacteres       | Solibacteres                                                  | Solibacteraceae      | Candidatus_Solibacter |  |  |  |  |
| 1050                     | 0  | 0  | 0  | 1   | Acidobacteria  | Chloracidobacteria | unclassified                                                  | unclassified         | unclassified          |  |  |  |  |
| 1089                     | 1  | 0  | 0  | 0   | Acidobacteria  | Chloracidobacteria | unclassified                                                  | unclassified         | unclassified          |  |  |  |  |
| 1137                     | 0  | 0  | 1  | 1   | Acidobacteria  | Chloracidobacteria | unclassified                                                  | unclassified         | unclassified          |  |  |  |  |
| 1175                     | 0  | 0  | 1  | 1   | Acidobacteria  | Acidobacteriales   | Acidobacteriales                                              | Acidobacteriaceae    | unclassified          |  |  |  |  |
| 1196                     | 0  | 0  | 0  | 1   | Acidobacteria  | Solibacteres       | Solibacteres                                                  | Solibacteraceae      | Candidatus_Solibacter |  |  |  |  |
| 1215                     | 0  | 1  | 0  | 0   | Acidobacteria  | Solibacteres       | Solibacteres                                                  | Solibacteraceae      | Candidatus_Solibacter |  |  |  |  |
| 1223                     | 0  | 0  | 0  | 1   | Acidobacteria  | Acidobacteriales   | Acidobacteriales                                              | Acidobacteriaceae    | unclassified          |  |  |  |  |
| 1323                     | 0  | 1  | 0  | 0   | Acidobacteria  | Chloracidobacteria | unclassified                                                  | unclassified         | unclassified          |  |  |  |  |
| 1349                     | 1  | 1  | 0  | 0   | Acidobacteria  | Chloracidobacteria | unclassified                                                  | unclassified         | unclassified          |  |  |  |  |
| 1376                     | 1  | 2  | 1  | 0   | Acidobacteria  | Chloracidobacteria | unclassified                                                  | unclassified         | unclassified          |  |  |  |  |
| 1388                     | 0  | 1  | 0  | 0   | Acidobacteria  | Solibacteres       | Solibacteres                                                  | Solibacteraceae      | Candidatus_Solibacter |  |  |  |  |
| 1435                     | 0  | 1  | 0  | 0   | Acidobacteria  | Solibacteres       | Solibacteres                                                  | Solibacteraceae      | Candidatus_Solibacter |  |  |  |  |
| 1487                     | 0  | 2  | 0  | 0   | Acidobacteria  | Acidobacteriales   | Acidobacteriales                                              | Acidobacteriaceae    | unclassified          |  |  |  |  |
| 1507                     | 0  | 1  | 0  | 0   | Acidobacteria  | Acidobacteriales   | Acidobacteriales                                              | Acidobacteriaceae    | Terriglobus           |  |  |  |  |
| 1537                     | 0  | 1  | 0  | 0   | Acidobacteria  | Chloracidobacteria | unclassified                                                  | unclassified         | unclassified          |  |  |  |  |
| 1559                     | 0  | 0  | 3  | 1   | Acidobacteria  | Acidobacteriales   | Acidobacteriales                                              | Acidobacteriaceae    | unclassified          |  |  |  |  |
| 1570                     | 0  | 1  | 0  | 1   | Acidobacteria  | iii-8              | 32-20                                                         | unclassified         | unclassified          |  |  |  |  |
| 1572                     | 0  | 1  | 0  | 0   | Acidobacteria  | Solibacteres       | Solibacteres                                                  | Solibacteraceae      | Candidatus_Solibacter |  |  |  |  |
| 1592                     | 0  | 0  | 1  | 1   | Acidobacteria  | iii-8              | 32-20                                                         | unclassified         | unclassified          |  |  |  |  |
| 1628                     | 0  | 1  | 0  | 0   | Acidobacteria  | Solibacteres       | Solibacteres                                                  | Solibacteraceae      | Candidatus_Solibacter |  |  |  |  |
| 1644                     | 0  | 1  | 0  | 0   | Acidobacteria  | Chloracidobacteria | unclassified                                                  | unclassified         | unclassified          |  |  |  |  |
| 10                       | 0  | 1  | 1  | 0   | Actinobacteria | Actinobacteria     | Acidimicrobiales                                              | CL500-29             | unclassified          |  |  |  |  |
| 21                       | 0  | 1  | 0  | 0   | Actinobacteria | Actinobacteria     | Actinobacteria                                                | CL500-29             | unclassified          |  |  |  |  |
| 31                       | 0  | 1  | 0  | 1   | Actinobacteria | Actinobacteria     | 0319-7L14                                                     | unclassified         | unclassified          |  |  |  |  |
| 37                       | 0  | 1  | 4  | 8   | Actinobacteria | Actinobacteria     | Actinomycetales                                               | Propionibacteriaceae | Propionibacterium     |  |  |  |  |
| 38                       | 0  | 1  | 0  | 0   | Actinobacteria | Actinobacteria     | Actinomycetales                                               | Propionibacteriaceae | Tessaracoccus         |  |  |  |  |
| 42                       | 0  | 0  | 1  | 0   | Actinobacteria | Actinobacteria     | Acidimicrobiales                                              | lamiaeae             | lamia                 |  |  |  |  |
| 59                       | 0  | 37 | 0  | 0   | Actinobacteria | Actinobacteria     | Actinomycetales                                               | Intrasporangiaceae   | unclassified          |  |  |  |  |
| 63                       | 0  | 2  | 1  | 0   | Actinobacteria | Actinobacteria     | unclassified                                                  | unclassified         | unclassified          |  |  |  |  |
| 66                       | 0  | 0  | 0  | 1   | Actinobacteria | Actinobacteria     | Acidimicrobiales                                              | CL500-29             | unclassified          |  |  |  |  |
| 81                       | 0  | 2  | 0  | 0   | Actinobacteria | Actinobacteria     | Acidimicrobiales                                              | lamiaeae             | lamia                 |  |  |  |  |
| 82                       | 0  | 1  | 0  | 0   | Actinobacteria | Actinobacteria     | Acidimicrobiales                                              | CL500-29             | unclassified          |  |  |  |  |
| 86                       | 0  | 0  | 2  | 5   | Actinobacteria | Actinobacteria     | Actinomycetales                                               | Corynebacteriaceae   | Corynebacterium       |  |  |  |  |
| 88                       | 1  | 3  | 5  | 5   | Actinobacteria | Actinobacteria     | Actinomycetales                                               | Intrasporangiaceae   | Janibacter            |  |  |  |  |
| 90                       | 0  | 0  | 1  | 0   | Actinobacteria | Actinobacteria     | Solirubrobacterales                                           | Conexibacteraceae    | unclassified          |  |  |  |  |
| 95                       | 0  | 1  | 1  | 0   | Actinobacteria | Actinobacteria     | Actinomycetales                                               | Microbacteriaceae    | Microbacterium        |  |  |  |  |
| 99                       | 0  | 1  | 3  | 2   | Actinobacteria | Actinobacteria     | Actinomycetales                                               | unclassified         | unclassified          |  |  |  |  |
| 100                      | 3  | 10 | 9  | 3   | Actinobacteria | Actinobacteria     | Actinomycetales                                               | Microbacteriaceae    | Microbacterium        |  |  |  |  |
| 146                      | 0  | 2  | 0  | 3   | Actinobacteria | Actinobacteria     | Actinomycetales                                               | Micrococccaceae      | unclassified          |  |  |  |  |
| 152                      | 0  | 0  | 1  | 1   | Actinobacteria | Actinobacteria     | Actinomycetales                                               | Propionibacteriaceae | Propionibacterium     |  |  |  |  |
| 163                      | 2  | 0  | 1  | 2   | Actinobacteria | Actinobacteria     | Actinomycetales                                               | Corynebacteriaceae   | Corynebacterium       |  |  |  |  |
| 171                      | 0  | 1  | 0  | 0   | Actinobacteria | Actinobacteria     | Acidimicrobiales                                              | Acidimicrobiaceae    | unclassified          |  |  |  |  |
| 177                      | 0  | 1  | 2  | 0   | Actinobacteria | Actinobacteria     | Actinomycetales                                               | Mycobacteriaceae     | Mycobacterium         |  |  |  |  |
| 192                      | 0  | 1  | 0  | 0   | Actinobacteria | Actinobacteria     | Actinomycetales                                               | Microbacteriaceae    | unclassified          |  |  |  |  |
| 205                      | 0  | 0  | 0  | 3   | Actinobacteria | Actinobacteria     | Actinomycetales                                               | Nocardioidaceae      | Nocardioides          |  |  |  |  |
| 225                      | 0  | 1  | 0  | 0   | Actinobacteria | Actinobacteria     | Actinomycetales                                               | Nocardioidaceae      | Nocardioides          |  |  |  |  |
| 232                      | 0  | 0  | 2  | 3   | Actinobacteria | Actinobacteria     | Actinomycetales                                               | Microbacteriaceae    | unclassified          |  |  |  |  |
| 237                      | 0  | 0  | 1  | 0   | Actinobacteria | Actinobacteria     | Actinomycetales                                               | Propionibacteriaceae | Propionibacterium     |  |  |  |  |
| 249                      | 0  | 2  | 0  | 0   | Actinobacteria | Actinobacteria     | Acidimicrobiales                                              | CL500-29             | unclassified          |  |  |  |  |
| 251                      | 2  | 0  | 0  | 0   | Actinobacteria | Actinobacteria     | unclassified                                                  | unclassified         | unclassified          |  |  |  |  |
| 257                      | 0  | 0  | 1  | 0   | Actinobacteria | Actinobacteria     | Actinomycetales                                               | Nocardioidaceae      | unclassified          |  |  |  |  |
| 259                      | 0  | 1  | 2  | 0   | Actinobacteria | Actinobacteria     | Actinomycetales                                               | Frankiaceae          | unclassified          |  |  |  |  |
| 261                      | 0  | 1  | 1  | 0   | Actinobacteria | Actinobacteria     | Actinomycetales                                               | Nocardioidaceae      | Propionimonas         |  |  |  |  |
| 264                      | 0  | 0  | 1  | 0   | Actinobacteria | Actinobacteria     | Actinomycetales                                               | Conexibacteriaceae   | unclassified          |  |  |  |  |
| 280                      | 0  | 0  | 0  | 4   | Actinobacteria | Actinobacteria     | Coriobacteriales                                              | Coriobacteriaceae    | unclassified          |  |  |  |  |
| 284                      | 0  | 1  | 0  | 0   | Actinobacteria | Actinobacteria     | Actinomycetales                                               | Propionibacteriaceae | Luteococcus           |  |  |  |  |
| 294                      | 0  | 0  | 1  | 0   | Actinobacteria | Actinobacteria     | Actinomycetales                                               | unclassified         | unclassified          |  |  |  |  |
| 302                      | 0  | 3  | 0  | 0   | Actinobacteria | Actinobacteria     | Actinomycetales                                               | Cellulomonadaceae    | unclassified          |  |  |  |  |
| 312                      | 0  | 1  | 0  | 0   | Actinobacteria | Actinobacteria     | Solirubrobacterales                                           | Patulibacteriaceae   | unclassified          |  |  |  |  |
| 316                      | 0  | 5  | 0  | 0   | Actinobacteria | Actinobacteria     | Actinomycetales                                               | Propionibacteriaceae | Tessaracoccus         |  |  |  |  |
| 321                      | 0  | 2  | 0  | 0   | Actinobacteria | Actinobacteria     | Actinomycetales                                               | Cellulomonadaceae    | unclassified          |  |  |  |  |
| 325                      | 1  | 0  | 0  | 0   | Actinobacteria | Actinobacteria     | Actinomycetales                                               | Kineosporiaceae      | unclassified          |  |  |  |  |
| 348                      | 0  | 0  | 1  | 0   | Actinobacteria | Actinobacteria     | Solirubrobacterales                                           | Conexibacteriaceae   | unclassified          |  |  |  |  |
| 346                      | 0  | 1  | 0  | 0   | Actinobacteria | Actinobacteria     | Actinomycetales                                               | Intrasporangiaceae   | unclassified          |  |  |  |  |
| 365                      | 0  | 1  | 1  | 0   | Actinobacteria | Actinobacteria     | Actinomycetales                                               | Corynebacteriaceae   | Corynebacterium       |  |  |  |  |
| 371                      | 2  | 0  | 2  | 2   | Actinobacteria | Actinobacteria     | Coriobacteriales                                              | Coriobacteriaceae    | Collinsella           |  |  |  |  |
| 382                      | 0  | 1  | 0  | 0   | Actinobacteria | Actinobacteria     | Actinomycetales                                               | unclassified         | unclassified          |  |  |  |  |
| 398                      | 1  | 1  | 1  | 1   | Actinobacteria | Actinobacteria     | Actinomycetales                                               | unclassified         | unclassified          |  |  |  |  |
| 404                      | 0  | 1  | 0  | 0   | Actinobacteria | Actinobacteria     | Actinomycetales                                               | Nocardioidaceae      | Propionimonas         |  |  |  |  |
| 407                      | 0  | 5  | 0  | 0   | Actinobacteria | Actinobacteria     | Acidimicrobiales                                              | unclassified         | unclassified          |  |  |  |  |

Table S5 (part B): OTUs, no. of reads and corresponding taxonomic affiliation of detected bacterial 16S rRNA amplicons by 454 pyrotag sequencing. Please note, the data shown here were either rank normalized or sum normalized (to 5000 reads per sample) before performing statistical analysis as depicted in the manuscript.

| Samples and no. of reads |    |    |    |     | taxonomic classification of bacterial 16S rRNA gene amplicons |                |                     |                      |                   |  |  |  |  |
|--------------------------|----|----|----|-----|---------------------------------------------------------------|----------------|---------------------|----------------------|-------------------|--|--|--|--|
| OTU                      | UR | CO | CR | CRS | phylum                                                        | class          | order               | family               | genus             |  |  |  |  |
| 408                      | 0  | 13 | 0  | 0   | Actinobacteria                                                | Actinobacteria | Actinomycetales     | Microbacteriaceae    | Leucobacter       |  |  |  |  |
| 410                      | 1  | 3  | 1  | 0   | Actinobacteria                                                | Actinobacteria | Actinomycetales     | Nocardioidaceae      | Propionimonas     |  |  |  |  |
| 412                      | 1  | 1  | 0  | 0   | Actinobacteria                                                | Actinobacteria | Actinomycetales     | Dermacoccaceae       | Dermacoccus       |  |  |  |  |
| 418                      | 0  | 3  | 0  | 0   | Actinobacteria                                                | Actinobacteria | Actinomycetales     | Actinomycetaceae     | Actinomycetes     |  |  |  |  |
| 441                      | 2  | 1  | 5  | 0   | Actinobacteria                                                | Actinobacteria | Actinomycetales     | Corynebacteriaceae   | Corynebacterium   |  |  |  |  |
| 450                      | 6  | 1  | 0  | 0   | Actinobacteria                                                | Actinobacteria | Actinomycetales     | Microbacteriaceae    | unclassified      |  |  |  |  |
| 452                      | 5  | 1  | 0  | 0   | Actinobacteria                                                | Actinobacteria | Actinomycetales     | unclassified         | unclassified      |  |  |  |  |
| 462                      | 0  | 0  | 1  | 0   | Actinobacteria                                                | Actinobacteria | MC47                | unclassified         | unclassified      |  |  |  |  |
| 465                      | 2  | 0  | 0  | 0   | Actinobacteria                                                | Actinobacteria | Actinomycetales     | Nocardioidaceae      | Propionimonas     |  |  |  |  |
| 470                      | 0  | 0  | 3  | 0   | Actinobacteria                                                | Actinobacteria | Actinomycetales     | Gordoniaceae         | Gordonia          |  |  |  |  |
| 472                      | 1  | 1  | 1  | 0   | Actinobacteria                                                | Actinobacteria | Solirubrobacterales | Conexibacteraceae    | unclassified      |  |  |  |  |
| 478                      | 2  | 2  | 1  | 0   | Actinobacteria                                                | Actinobacteria | Solirubrobacterales | Conexibacteraceae    | unclassified      |  |  |  |  |
| 485                      | 2  | 0  | 0  | 0   | Actinobacteria                                                | Actinobacteria | Solirubrobacterales | Patulibacteriaceae   | unclassified      |  |  |  |  |
| 493                      | 3  | 2  | 2  | 0   | Actinobacteria                                                | Actinobacteria | Actinomycetales     | Microbacteriaceae    | Agrobacter        |  |  |  |  |
| 499                      | 0  | 2  | 0  | 0   | Actinobacteria                                                | Actinobacteria | Actinomycetales     | Propionibacteriaceae | unclassified      |  |  |  |  |
| 529                      | 1  | 0  | 0  | 0   | Actinobacteria                                                | Actinobacteria | Acidimicrobiales    | AKW874               | unclassified      |  |  |  |  |
| 533                      | 0  | 1  | 0  | 0   | Actinobacteria                                                | Actinobacteria | Actinomycetales     | Cellulomonadaceae    | Actinotalea       |  |  |  |  |
| 537                      | 0  | 1  | 1  | 0   | Actinobacteria                                                | Actinobacteria | Acidimicrobiales    | unclassified         | unclassified      |  |  |  |  |
| 557                      | 0  | 0  | 0  | 0   | Actinobacteria                                                | Actinobacteria | Actinomycetales     | Microbacteriaceae    | Yongbaparkia      |  |  |  |  |
| 559                      | 5  | 0  | 0  | 0   | Actinobacteria                                                | Actinobacteria | Actinomycetales     | unclassified         | unclassified      |  |  |  |  |
| 563                      | 0  | 1  | 0  | 0   | Actinobacteria                                                | Actinobacteria | Acidimicrobiales    | Microthricaceae      | unclassified      |  |  |  |  |
| 565                      | 28 | 0  | 0  | 0   | Actinobacteria                                                | Actinobacteria | Acidimicrobiales    | lamiaeae             | unclassified      |  |  |  |  |
| 567                      | 1  | 0  | 2  | 0   | Actinobacteria                                                | Actinobacteria | Actinomycetales     | Pseudonocardiaceae   | Pseudonocardia    |  |  |  |  |
| 569                      | 0  | 0  | 0  | 0   | Actinobacteria                                                | Actinobacteria | Acidimicrobiales    | unclassified         | unclassified      |  |  |  |  |
| 571                      | 0  | 4  | 0  | 0   | Actinobacteria                                                | Actinobacteria | Actinomycetales     | Corynebacteriaceae   | Corynebacterium   |  |  |  |  |
| 573                      | 2  | 0  | 0  | 0   | Actinobacteria                                                | Actinobacteria | Actinomycetales     | Actinomycetaceae     | Actinomycetes     |  |  |  |  |
| 575                      | 0  | 0  | 1  | 0   | Actinobacteria                                                | Actinobacteria | Actinomycetales     | Actinomycetaceae     | Actinomycetes     |  |  |  |  |
| 577                      | 0  | 1  | 0  | 0   | Actinobacteria                                                | Actinobacteria | Actinomycetales     | unclassified         | unclassified      |  |  |  |  |
| 579                      | 0  | 1  | 0  | 0   | Actinobacteria                                                | Actinobacteria | Actinomycetales     | unclassified         | unclassified      |  |  |  |  |
| 581                      | 1  | 0  | 0  | 0   | Actinobacteria                                                | Actinobacteria | Actinomycetales     | unclassified         | unclassified      |  |  |  |  |
| 583                      | 1  | 0  | 0  | 0   | Actinobacteria                                                | Actinobacteria | Acidimicrobiales    | Acidimicrobiaceae    | unclassified      |  |  |  |  |
| 585                      | 16 | 1  | 0  | 0   | Actinobacteria                                                | Actinobacteria | Actinomycetales     | Propionibacteriaceae | unclassified      |  |  |  |  |
| 587                      | 4  | 1  | 0  | 0   | Actinobacteria                                                | Actinobacteria | Solirubrobacterales | Conexibacteraceae    | unclassified      |  |  |  |  |
| 589                      | 1  | 1  | 1  | 0   | Actinobacteria                                                | Actinobacteria | Actinomycetales     | unclassified         | unclassified      |  |  |  |  |
| 591                      | 1  | 0  | 1  | 0   | Actinobacteria                                                | Actinobacteria | Actinomycetales     | Nocardioidaceae      | unclassified      |  |  |  |  |
| 593                      | 1  | 0  | 0  | 0   | Actinobacteria                                                | Actinobacteria | Actinomycetales     | unclassified         | unclassified      |  |  |  |  |
| 595                      | 1  | 1  | 0  | 0   | Actinobacteria                                                | Actinobacteria | Acidimicrobiales    | CL500-29             | unclassified      |  |  |  |  |
| 597                      | 1  | 0  | 0  | 0   | Actinobacteria                                                | Actinobacteria | Actinomycetales     | Geodermatophilaceae  | Geodermatophilus  |  |  |  |  |
| 599                      | 0  | 6  | 5  | 0   | Actinobacteria                                                | Actinobacteria | Actinomycetales     | Brevibacteriaceae    | Brevibacterium    |  |  |  |  |
| 601                      | 0  | 1  | 1  | 0   | Actinobacteria                                                | Actinobacteria | Actinomycetales     | Geodermatophilaceae  | Geodermatophilus  |  |  |  |  |
| 603                      | 1  | 1  | 1  | 0   | Actinobacteria                                                | Actinobacteria | Actinomycetales     | Propionibacteriaceae | unclassified      |  |  |  |  |
| 605                      | 0  | 2  | 0  | 0   | Actinobacteria                                                | Actinobacteria | Solirubrobacterales | Patulibacteriaceae   | unclassified      |  |  |  |  |
| 607                      | 0  | 0  | 0  | 0   | Actinobacteria                                                | Actinobacteria | Actinomycetales     | Microbacteriaceae    | Agrobacter        |  |  |  |  |
| 609                      | 3  | 0  | 1  | 0   | Actinobacteria                                                | Actinobacteria | MC47                | unclassified         | unclassified      |  |  |  |  |
| 611                      | 1  | 0  | 0  | 0   | Actinobacteria                                                | Actinobacteria | Actinomycetales     | unclassified         | unclassified      |  |  |  |  |
| 613                      | 3  | 0  | 1  | 0   | Actinobacteria                                                | Actinobacteria | Actinomycetales     | Nakamurellaceae      | unclassified      |  |  |  |  |
| 615                      | 1  | 0  | 0  | 0   | Actinobacteria                                                | Actinobacteria | Solirubrobacterales | Conexibacteraceae    | unclassified      |  |  |  |  |
| 617                      | 1  | 0  | 0  | 0   | Actinobacteria                                                | Actinobacteria | Actinomycetales     | Micromonosporaceae   | unclassified      |  |  |  |  |
| 619                      | 7  | 4  | 2  | 0   | Actinobacteria                                                | Actinobacteria | Actinomycetales     | Geodermatophilaceae  | unclassified      |  |  |  |  |
| 621                      | 0  | 0  | 0  | 0   | Actinobacteria                                                | Actinobacteria | Solirubrobacterales | Conexibacteraceae    | unclassified      |  |  |  |  |
| 623                      | 4  | 6  | 7  | 0   | Actinobacteria                                                | Actinobacteria | Actinomycetales     | Nocardioidaceae      | unclassified      |  |  |  |  |
| 625                      | 0  | 0  | 1  | 0   | Actinobacteria                                                | Actinobacteria | Actinomycetales     | Microbacteriaceae    | Microbacterium    |  |  |  |  |
| 627                      | 3  | 0  | 0  | 0   | Actinobacteria                                                | Actinobacteria | Actinomycetales     | Micromonosporaceae   | unclassified      |  |  |  |  |
| 629                      | 3  | 0  | 0  | 0   | Actinobacteria                                                | Actinobacteria | Actinomycetales     | Nocardioidaceae      | Aeromicrobium     |  |  |  |  |
| 631                      | 3  | 0  | 0  | 0   | Actinobacteria                                                | Actinobacteria | Actinomycetales     | unclassified         | unclassified      |  |  |  |  |
| 633                      | 0  | 0  | 0  | 0   | Actinobacteria                                                | Actinobacteria | Actinomycetales     | Propionibacteriaceae | unclassified      |  |  |  |  |
| 635                      | 3  | 0  | 0  | 0   | Actinobacteria                                                | Actinobacteria | Solirubrobacterales | Solirubrobacterales  | unclassified      |  |  |  |  |
| 637                      | 38 | 13 | 14 | 0   | Actinobacteria                                                | Actinobacteria | Actinomycetales     | Nocardioidaceae      | Friedmanniella    |  |  |  |  |
| 639                      | 1  | 0  | 0  | 0   | Actinobacteria                                                | Actinobacteria | Acidimicrobiales    | Acidimicrobiaceae    | unclassified      |  |  |  |  |
| 641                      | 0  | 0  | 1  | 0   | Actinobacteria                                                | Actinobacteria | MC47                | unclassified         | unclassified      |  |  |  |  |
| 643                      | 4  | 2  | 4  | 0   | Actinobacteria                                                | Actinobacteria | Acidimicrobiales    | CL500-29             | unclassified      |  |  |  |  |
| 645                      | 0  | 1  | 0  | 0   | Actinobacteria                                                | Actinobacteria | Actinomycetales     | Williamsiaceae       | Williamsia        |  |  |  |  |
| 647                      | 2  | 0  | 0  | 0   | Actinobacteria                                                | Actinobacteria | Actinomycetales     | unclassified         | unclassified      |  |  |  |  |
| 649                      | 17 | 6  | 14 | 0   | Actinobacteria                                                | Actinobacteria | Actinomycetales     | Dermabacteriaceae    | Brachybacterium   |  |  |  |  |
| 651                      | 1  | 1  | 1  | 0   | Actinobacteria                                                | Actinobacteria | Solirubrobacterales | Conexibacteraceae    | unclassified      |  |  |  |  |
| 653                      | 0  | 1  | 0  | 0   | Actinobacteria                                                | Actinobacteria | Coriobacteriales    | Coriobacteriaceae    | Atopobium         |  |  |  |  |
| 655                      | 1  | 0  | 0  | 0   | Actinobacteria                                                | Actinobacteria | Actinomycetales     | Nocardioidaceae      | Nocardoides       |  |  |  |  |
| 657                      | 4  | 0  | 0  | 0   | Actinobacteria                                                | Actinobacteria | Acidimicrobiales    | Microthricaceae      | unclassified      |  |  |  |  |
| 659                      | 0  | 3  | 5  | 0   | Actinobacteria                                                | Actinobacteria | Actinomycetales     | Dermococcaceae       | Kytococcus        |  |  |  |  |
| 661                      | 0  | 0  | 0  | 0   | Actinobacteria                                                | Actinobacteria | Solirubrobacterales | Conexibacteraceae    | unclassified      |  |  |  |  |
| 663                      | 1  | 0  | 0  | 0   | Actinobacteria                                                | Actinobacteria | Solirubrobacterales | Conexibacteraceae    | unclassified      |  |  |  |  |
| 665                      | 1  | 0  | 1  | 0   | Actinobacteria                                                | Actinobacteria | Actinomycetales     | Cellulomonadaceae    | unclassified      |  |  |  |  |
| 667                      | 1  | 0  | 0  | 0   | Actinobacteria                                                | Actinobacteria | Actinomycetales     | Propionibacteriaceae | Tessaracoccus     |  |  |  |  |
| 669                      | 1  | 0  | 0  | 0   | Actinobacteria                                                | Actinobacteria | Actinomycetales     | Kineosporiaceae      | unclassified      |  |  |  |  |
| 671                      | 3  | 0  | 0  | 0   | Actinobacteria                                                | Actinobacteria | Acidimicrobiales    | lamiaeae             | unclassified      |  |  |  |  |
| 673                      | 7  | 0  | 0  | 0   | Actinobacteria                                                | Actinobacteria | Actinomycetales     | unclassified         | unclassified      |  |  |  |  |
| 675                      | 2  | 1  | 1  | 0   | Actinobacteria                                                | Actinobacteria | Actinomycetales     | Nocardioidaceae      | Nocardoides       |  |  |  |  |
| 677                      | 1  | 0  | 0  | 0   | Actinobacteria                                                | Actinobacteria | Actinomycetales     | Nocardioidaceae      | unclassified      |  |  |  |  |
| 679                      | 11 | 23 | 10 | 0   | Actinobacteria                                                | Actinobacteria | Actinomycetales     | Micrococcaceae       | Kocuria           |  |  |  |  |
| 681                      | 1  | 0  | 0  | 0   | Actinobacteria                                                | Actinobacteria | Actinomycetales     | Nocardioidaceae      | Nocardoides       |  |  |  |  |
| 683                      | 4  | 0  | 0  | 0   | Actinobacteria                                                | Actinobacteria | Actinomycetales     | Nocardioidaceae      | Friedmanniella    |  |  |  |  |
| 685                      | 0  | 0  | 0  | 0   | Actinobacteria                                                | Actinobacteria | Solirubrobacterales | Patulibacteriaceae   | unclassified      |  |  |  |  |
| 687                      | 0  | 2  | 4  | 0   | Actinobacteria                                                | Actinobacteria | Actinomycetales     | Propionibacteriaceae | Propionibacterium |  |  |  |  |
| 689                      | 0  | 0  | 0  | 0   | Actinobacteria                                                | Actinobacteria | Actinomycetales     | Microbacteriaceae    | unclassified      |  |  |  |  |
| 691                      | 0  | 0  | 1  | 0   | Actinobacteria                                                | Actinobacteria | MC47                | unclassified         | unclassified      |  |  |  |  |
| 693                      | 0  | 1  | 1  | 0   | Actinobacteria                                                | Actinobacteria | Actinomycetales     | Mycobacteriaceae     | Mycobacterium     |  |  |  |  |
| 695                      | 0  | 2  | 0  | 0   | Actinobacteria                                                | Actinobacteria | Actinomycetales     | Propionibacteriaceae | Propionibacterium |  |  |  |  |
| 697                      | 0  | 1  | 0  | 0   | Actinobacteria                                                | Actinobacteria | 0319-7L14           | unclassified         | unclassified      |  |  |  |  |
| 699                      | 1  | 1  | 1  | 0   | Actinobacteria                                                | Actinobacteria | Actinomycetales     | Microbacteriaceae    | Agromyces         |  |  |  |  |
| 701                      | 0  | 0  | 0  | 0   | Actinobacteria                                                | Actinobacteria | Actinomycetales     | Microbacteriaceae    | unclassified      |  |  |  |  |
| 703                      | 16 | 2  | 0  | 0   | Actinobacteria                                                | Actinobacteria | Actinomycetales     | Brevibacteriaceae    | Brevibacterium    |  |  |  |  |
| 705                      | 1  | 3  | 0  | 0   | Actinobacteria                                                | Actinobacteria | Actinomycetales     | Sanguibacteraceae    | unclassified      |  |  |  |  |
| 707                      | 0  | 0  | 1  | 0   | Actinobacteria                                                | Actinobacteria | Actinomycetales     | unclassified         | unclassified      |  |  |  |  |
| 709                      | 0  | 0  | 1  | 0   | Actinobacteria                                                | Actinobacteria | Solirubrobacterales | Conexibacteraceae    | unclassified      |  |  |  |  |
| 711                      | 48 | 0  | 0  | 0   | Actinobacteria                                                | Actinobacteria | Actinomycetales     | Propionibacteriaceae | Tessaracoccus     |  |  |  |  |
| 713                      | 1  | 0  | 0  | 0   | Actinobacteria                                                | Actinobacteria | Acidimicrobiales    | E81017               | unclassified      |  |  |  |  |
| 715                      | 4  | 2  | 1  | 0   | Actinobacteria                                                | Actinobacteria | Actinomycetales     | Geodermatophilaceae  | Geodermatophilus  |  |  |  |  |
| 717                      | 0  | 1  | 0  | 0   | Actinobacteria                                                | Actinobacteria | Actinomycetales     | Micrococcaceae       | Arthrobacter      |  |  |  |  |
| 719                      | 0  | 1  | 0  | 0   | Actinobacteria                                                | Actinobacteria | Actinomycetales     | Microbacteriaceae    | Plantibacter      |  |  |  |  |
| 721                      | 0  | 1  | 0  | 0   | Actinobacteria                                                | Actinobacteria | Actinomycetales     | unclassified         | unclassified      |  |  |  |  |

Table S5 (part C): OTUs, no. of reads and corresponding taxonomic affiliation of detected bacterial 16S rRNA amplicons by 454 pyrotag sequencing. Please note, the data shown here were either rank normalized or sum normalized (to 5000 reads per sample) before performing statistical analysis as depicted in the manuscript.

| Samples and no. of reads |    |    |     |     | taxonomic classification of bacterial 16S rRNA gene amplicons |                |                     |                     |                 |
|--------------------------|----|----|-----|-----|---------------------------------------------------------------|----------------|---------------------|---------------------|-----------------|
| OTU                      | LR | CO | CNS | CNS | phylum                                                        | class          | order               | family              | genus           |
| 1425                     | 3  | 2  | 1   | 1   | Actinobacteria                                                | Actinobacteria | Actinomycetales     | Geodermatophilaceae | Modestobacter   |
| 1427                     | 0  | 3  | 1   | 0   | Actinobacteria                                                | Actinobacteria | Actinomycetales     | Microthricaceae     | unclassified    |
| 1456                     | 0  | 0  | 0   | 1   | Actinobacteria                                                | Actinobacteria | MC47                | unclassified        | unclassified    |
| 1468                     | 0  | 1  | 0   | 0   | Actinobacteria                                                | Actinobacteria | Actinomycetales     | Kineospiraceae      | Kineococcus     |
| 1480                     | 0  | 13 | 0   | 0   | Actinobacteria                                                | Actinobacteria | Actinomycetales     | C500-29             | unclassified    |
| 1492                     | 0  | 0  | 4   | 1   | Actinobacteria                                                | Actinobacteria | Actinomycetales     | Nocardioideae       | unclassified    |
| 1495                     | 2  | 0  | 12  | 5   | Actinobacteria                                                | Actinobacteria | Actinomycetales     | Brevibacteriaceae   | Brevibacterium  |
| 1511                     | 0  | 0  | 1   | 0   | Actinobacteria                                                | Actinobacteria | Actinomycetales     | C500-29             | unclassified    |
| 1517                     | 0  | 1  | 0   | 0   | Actinobacteria                                                | Actinobacteria | Actinomycetales     | Jonaceae            | unclassified    |
| 1523                     | 0  | 1  | 0   | 0   | Actinobacteria                                                | Actinobacteria | Actinomycetales     | Acidimicrobiales    | unclassified    |
| 1524                     | 0  | 1  | 2   | 0   | Actinobacteria                                                | Actinobacteria | Actinomycetales     | Acidimicrobiales    | unclassified    |
| 1529                     | 0  | 2  | 0   | 0   | Actinobacteria                                                | Actinobacteria | Actinomycetales     | C500-29             | unclassified    |
| 1531                     | 0  | 3  | 1   | 1   | Actinobacteria                                                | Actinobacteria | Actinomycetales     | Dematiaceae         | unclassified    |
| 1532                     | 0  | 0  | 0   | 1   | Actinobacteria                                                | Actinobacteria | Actinomycetales     | C500-29             | unclassified    |
| 1534                     | 0  | 1  | 0   | 3   | Actinobacteria                                                | Actinobacteria | Actinomycetales     | Kineospiraceae      | unclassified    |
| 1536                     | 0  | 1  | 1   | 1   | Actinobacteria                                                | Actinobacteria | Actinomycetales     | unclassified        | unclassified    |
| 1539                     | 0  | 1  | 0   | 0   | Actinobacteria                                                | Actinobacteria | Actinomycetales     | Micromonosporaceae  | unclassified    |
| 1545                     | 0  | 1  | 0   | 0   | Actinobacteria                                                | Actinobacteria | Actinomycetales     | Connexibacteraceae  | unclassified    |
| 1578                     | 1  | 0  | 0   | 0   | Actinobacteria                                                | Actinobacteria | MC47                | unclassified        | unclassified    |
| 1590                     | 0  | 20 | 4   | 1   | Actinobacteria                                                | Actinobacteria | Solirubrobacterales | Actinobacteraceae   | unclassified    |
| 1601                     | 0  | 0  | 0   | 1   | Actinobacteria                                                | Actinobacteria | Actinomycetales     | unclassified        | unclassified    |
| 1634                     | 0  | 0  | 2   | 0   | Actinobacteria                                                | Actinobacteria | Solirubrobacterales | Connexibacteraceae  | unclassified    |
| 1638                     | 1  | 0  | 3   | 1   | Actinobacteria                                                | Actinobacteria | Actinomycetales     | Corynebacteriaceae  | Corynebacterium |
| 1640                     | 0  | 1  | 1   | 2   | Actinobacteria                                                | Actinobacteria | Actinomycetales     | Pseudonocardiaceae  | Pseudonocardia  |
| 1656                     | 0  | 1  | 0   | 0   | Actinobacteria                                                | Actinobacteria | Actinomycetales     | Intrasporangiaceae  | Arsenicoccus    |
| 1660                     | 1  | 5  | 0   | 0   | Actinobacteria                                                | Actinobacteria | Actinomycetales     | Bogoriellaceae      | Georgiella      |
| 1671                     | 0  | 0  | 0   | 1   | Actinobacteria                                                | Actinobacteria | Solirubrobacterales | Connexibacteraceae  | unclassified    |
| 1676                     | 0  | 8  | 2   | 1   | Actinobacteria                                                | Actinobacteria | Actinomycetales     | Microbacteriaceae   | Flavobacterium  |
| 1678                     | 0  | 1  | 0   | 0   | Actinobacteria                                                | Actinobacteria | Actinomycetales     | EB107               | unclassified    |
| 1689                     | 1  | 45 | 0   | 0   | Actinobacteria                                                | Actinobacteria | Actinomycetales     | Nocardioideae       | Propionimonas   |
| 1696                     | 0  | 0  | 2   | 5   | Actinobacteria                                                | Actinobacteria | Actinomycetales     | Corynebacteriaceae  | Corynebacterium |
| 1705                     | 3  | 17 | 2   | 2   | Actinobacteria                                                | Actinobacteria | Actinomycetales     | unclassified        | unclassified    |
| 1717                     | 0  | 14 | 0   | 0   | Actinobacteria                                                | Actinobacteria | Actinomycetales     | unclassified        | unclassified    |
| 18                       | 0  | 0  | 1   | 0   | Actinobacteria                                                | Actinobacteria | Actinomycetales     | WD34                | unclassified    |
| 29                       | 0  | 0  | 1   | 0   | Actinobacteria                                                | Actinobacteria | Actinomycetales     | unclassified        | unclassified    |
| 101                      | 0  | 0  | 0   | 1   | Actinobacteria                                                | Actinobacteria | Actinomycetales     | unclassified        | unclassified    |
| 197                      | 0  | 1  | 0   | 0   | Actinobacteria                                                | Actinobacteria | Actinomycetales     | unclassified        | unclassified    |
| 447                      | 0  | 1  | 0   | 0   | Actinobacteria                                                | Actinobacteria | Actinomycetales     | unclassified        | unclassified    |
| 647                      | 1  | 0  | 0   | 0   | Actinobacteria                                                | Actinobacteria | Actinomycetales     | unclassified        | unclassified    |
| 795                      | 4  | 0  | 0   | 0   | Actinobacteria                                                | Actinobacteria | Actinomycetales     | unclassified        | unclassified    |
| 895                      | 0  | 0  | 0   | 0   | Actinobacteria                                                | Actinobacteria | Actinomycetales     | unclassified        | unclassified    |
| 902                      | 1  | 0  | 0   | 0   | Actinobacteria                                                | Actinobacteria | Actinomycetales     | unclassified        | unclassified    |
| 1031                     | 0  | 0  | 0   | 1   | Actinobacteria                                                | Actinobacteria | Actinomycetales     | unclassified        | unclassified    |
| 1549                     | 0  | 0  | 0   | 2   | Actinobacteria                                                | Actinobacteria | Actinomycetales     | unclassified        | unclassified    |
| 1672                     | 0  | 0  | 0   | 1   | Actinobacteria                                                | Actinobacteria | Actinomycetales     | unclassified        | unclassified    |
| 2                        | 0  | 1  | 0   | 0   | Actinobacteria                                                | Actinobacteria | Actinomycetales     | unclassified        | unclassified    |
| 5                        | 0  | 1  | 0   | 0   | Actinobacteria                                                | Actinobacteria | Actinomycetales     | unclassified        | unclassified    |
| 13                       | 0  | 1  | 0   | 0   | Actinobacteria                                                | Actinobacteria | Actinomycetales     | unclassified        | unclassified    |
| 22                       | 1  | 0  | 1   | 0   | Actinobacteria                                                | Actinobacteria | Actinomycetales     | unclassified        | unclassified    |
| 30                       | 0  | 3  | 1   | 0   | Actinobacteria                                                | Actinobacteria | Actinomycetales     | unclassified        | unclassified    |
| 41                       | 0  | 1  | 0   | 0   | Actinobacteria                                                | Actinobacteria | Actinomycetales     | unclassified        | unclassified    |
| 45                       | 0  | 2  | 0   | 0   | Actinobacteria                                                | Actinobacteria | Actinomycetales     | unclassified        | unclassified    |
| 53                       | 0  | 1  | 0   | 0   | Actinobacteria                                                | Actinobacteria | Actinomycetales     | unclassified        | unclassified    |
| 57                       | 0  | 1  | 0   | 0   | Actinobacteria                                                | Actinobacteria | Actinomycetales     | unclassified        | unclassified    |
| 71                       | 0  | 0  | 0   | 0   | Actinobacteria                                                | Actinobacteria | Actinomycetales     | unclassified        | unclassified    |
| 80                       | 1  | 4  | 2   | 5   | Actinobacteria                                                | Actinobacteria | Actinomycetales     | unclassified        | unclassified    |
| 84                       | 0  | 4  | 0   | 0   | Actinobacteria                                                | Actinobacteria | Actinomycetales     | unclassified        | unclassified    |
| 89                       | 0  | 0  | 5   | 6   | Actinobacteria                                                | Actinobacteria | Actinomycetales     | unclassified        | unclassified    |
| 96                       | 0  | 0  | 2   | 0   | Actinobacteria                                                | Actinobacteria | Actinomycetales     | unclassified        | unclassified    |
| 110                      | 0  | 1  | 0   | 0   | Actinobacteria                                                | Actinobacteria | Actinomycetales     | unclassified        | unclassified    |
| 128                      | 0  | 1  | 0   | 0   | Actinobacteria                                                | Actinobacteria | Actinomycetales     | unclassified        | unclassified    |
| 138                      | 0  | 1  | 0   | 0   | Actinobacteria                                                | Actinobacteria | Actinomycetales     | unclassified        | unclassified    |
| 139                      | 0  | 1  | 0   | 0   | Actinobacteria                                                | Actinobacteria | Actinomycetales     | unclassified        | unclassified    |
| 133                      | 0  | 1  | 0   | 0   | Actinobacteria                                                | Actinobacteria | Actinomycetales     | unclassified        | unclassified    |
| 136                      | 0  | 2  | 0   | 0   | Actinobacteria                                                | Actinobacteria | Actinomycetales     | unclassified        | unclassified    |
| 137                      | 0  | 1  | 0   | 0   | Actinobacteria                                                | Actinobacteria | Actinomycetales     | unclassified        | unclassified    |
| 142                      | 0  | 8  | 0   | 0   | Actinobacteria                                                | Actinobacteria | Actinomycetales     | unclassified        | unclassified    |
| 154                      | 0  | 1  | 1   | 0   | Actinobacteria                                                | Actinobacteria | Actinomycetales     | unclassified        | unclassified    |
| 160                      | 0  | 1  | 0   | 0   | Actinobacteria                                                | Actinobacteria | Actinomycetales     | unclassified        | unclassified    |
| 166                      | 0  | 1  | 0   | 0   | Actinobacteria                                                | Actinobacteria | Actinomycetales     | unclassified        | unclassified    |
| 168                      | 0  | 0  | 1   | 0   | Actinobacteria                                                | Actinobacteria | Actinomycetales     | unclassified        | unclassified    |
| 182                      | 0  | 0  | 0   | 1   | Actinobacteria                                                | Actinobacteria | Actinomycetales     | unclassified        | unclassified    |
| 188                      | 0  | 2  | 5   | 0   | Actinobacteria                                                | Actinobacteria | Actinomycetales     | unclassified        | unclassified    |
| 193                      | 0  | 1  | 0   | 0   | Actinobacteria                                                | Actinobacteria | Actinomycetales     | unclassified        | unclassified    |
| 200                      | 0  | 0  | 1   | 0   | Actinobacteria                                                | Actinobacteria | Actinomycetales     | unclassified        | unclassified    |
| 203                      | 0  | 1  | 0   | 0   | Actinobacteria                                                | Actinobacteria | Actinomycetales     | unclassified        | unclassified    |
| 215                      | 0  | 0  | 2   | 2   | Actinobacteria                                                | Actinobacteria | Actinomycetales     | unclassified        | unclassified    |
| 218                      | 0  | 3  | 0   | 0   | Actinobacteria                                                | Actinobacteria | Actinomycetales     | unclassified        | unclassified    |
| 220                      | 0  | 0  | 2   | 0   | Actinobacteria                                                | Actinobacteria | Actinomycetales     | unclassified        | unclassified    |
| 239                      | 0  | 0  | 0   | 1   | Actinobacteria                                                | Actinobacteria | Actinomycetales     | unclassified        | unclassified    |
| 240                      | 0  | 0  | 1   | 0   | Actinobacteria                                                | Actinobacteria | Actinomycetales     | unclassified        | unclassified    |
| 243                      | 0  | 1  | 0   | 0   | Actinobacteria                                                | Actinobacteria | Actinomycetales     | unclassified        | unclassified    |
| 244                      | 0  | 1  | 0   | 0   | Actinobacteria                                                | Actinobacteria | Actinomycetales     | unclassified        | unclassified    |
| 247                      | 0  | 1  | 0   | 0   | Actinobacteria                                                | Actinobacteria | Actinomycetales     | unclassified        | unclassified    |
| 248                      | 0  | 1  | 0   | 0   | Actinobacteria                                                | Actinobacteria | Actinomycetales     | unclassified        | unclassified    |
| 253                      | 0  | 0  | 1   | 0   | Actinobacteria                                                | Actinobacteria | Actinomycetales     | unclassified        | unclassified    |
| 268                      | 0  | 2  | 0   | 0   | Actinobacteria                                                | Actinobacteria | Actinomycetales     | unclassified        | unclassified    |
| 281                      | 0  | 0  | 2   | 2   | Actinobacteria                                                | Actinobacteria | Actinomycetales     | unclassified        | unclassified    |
| 305                      | 0  | 0  | 1   | 1   | Actinobacteria                                                | Actinobacteria | Actinomycetales     | unclassified        | unclassified    |
| 308                      | 0  | 1  | 2   | 2   | Actinobacteria                                                | Actinobacteria | Actinomycetales     | unclassified        | unclassified    |
| 309                      | 0  | 3  | 0   | 1   | Actinobacteria                                                | Actinobacteria | Actinomycetales     | unclassified        | unclassified    |
| 324                      | 0  | 22 | 0   | 0   | Actinobacteria                                                | Actinobacteria | Actinomycetales     | unclassified        | unclassified    |
| 326                      | 0  | 0  | 0   | 3   | Actinobacteria                                                | Actinobacteria | Actinomycetales     | unclassified        | unclassified    |
| 334                      | 1  | 9  | 6   | 6   | Actinobacteria                                                | Actinobacteria | Actinomycetales     | unclassified        | unclassified    |
| 354                      | 2  | 0  | 0   | 0   | Actinobacteria                                                | Actinobacteria | Actinomycetales     | unclassified        | unclassified    |
| 380                      | 0  | 0  | 0   | 0   | Actinobacteria                                                | Actinobacteria | Actinomycetales     | unclassified        | unclassified    |
| 388                      | 0  | 1  | 2   | 0   | Actinobacteria                                                | Actinobacteria | Actinomycetales     | unclassified        | unclassified    |
| 389                      | 0  | 1  | 0   | 0   | Actinobacteria                                                | Actinobacteria | Actinomycetales     | unclassified        | unclassified    |
| 391                      | 0  | 0  | 1   | 2   | Actinobacteria                                                | Actinobacteria | Actinomycetales     | unclassified        | unclassified    |
| 393                      | 2  | 0  | 0   | 1   | Actinobacteria                                                | Actinobacteria | Actinomycetales     | unclassified        | unclassified    |

Table S5 (part D): OTUs, no. of reads and corresponding taxonomic affiliation of detected bacterial 16S rRNA amplicons by 454 pyrotag sequencing. Please note, the data shown here were either rank normalized or sum normalized (to 5000 reads per sample) before performing statistical analysis as depicted in the manuscript.

| Samples and no. of reads |    |     |     |               | taxonomic classification of bacterial 16S rRNA gene amplicons |                    |                     |                           |  |
|--------------------------|----|-----|-----|---------------|---------------------------------------------------------------|--------------------|---------------------|---------------------------|--|
| OTU                      | CO | CNS | CNS | phylum        | class                                                         | order              | family              | genus                     |  |
| 400                      | 2  | 0   | 0   | Bacteroidetes | Sphingobacteria                                               | Sphingobacteriales | Flexibacteraceae    | Spirosoma                 |  |
| 417                      | 2  | 0   | 0   | Bacteroidetes | Sphingobacteria                                               | Sphingobacteriales | Chitinophagaceae    | unclassified              |  |
| 425                      | 0  | 2   | 1   | Bacteroidetes | Sphingobacteria                                               | Sphingobacteriales | Sphingobacteriaceae | Pedobacter                |  |
| 432                      | 19 | 0   | 0   | Bacteroidetes | Sphingobacteria                                               | Sphingobacteriales | Chitinophagaceae    | unclassified              |  |
| 434                      | 1  | 0   | 0   | Bacteroidetes | Sphingobacteria                                               | Sphingobacteriales | Chitinophagaceae    | Segittibacter             |  |
| 436                      | 0  | 0   | 3   | Bacteroidetes | Bacteroidia                                                   | Bacteroidales      | Prevotellaceae      | Prevotella                |  |
| 438                      | 0  | 0   | 1   | Bacteroidetes | Bacteroidia                                                   | Bacteroidales      | Rikenellaceae       | unclassified              |  |
| 442                      | 1  | 3   | 0   | Bacteroidetes | Sphingobacteria                                               | Sphingobacteriales | Flexibacteraceae    | unclassified              |  |
| 443                      | 0  | 2   | 0   | Bacteroidetes | Sphingobacteria                                               | Sphingobacteriales | Flexibacteraceae    | Hymenobacter              |  |
| 445                      | 0  | 0   | 2   | Bacteroidetes | Flavobacteria                                                 | Flavobacteriales   | Flavobacteriaceae   | Flavobacterium            |  |
| 455                      | 0  | 0   | 1   | Bacteroidetes | Sphingobacteria                                               | Sphingobacteriales | Chitinophagaceae    | unclassified              |  |
| 461                      | 0  | 0   | 1   | Bacteroidetes | Sphingobacteria                                               | Sphingobacteriales | Chitinophagaceae    | unclassified              |  |
| 461                      | 1  | 0   | 1   | Bacteroidetes | Sphingobacteria                                               | Sphingobacteriales | Flexibacteraceae    | Hymenobacter              |  |
| 487                      | 0  | 0   | 2   | Bacteroidetes | Sphingobacteria                                               | Sphingobacteriales | Flexibacteraceae    | Hymenobacter              |  |
| 502                      | 0  | 1   | 0   | Bacteroidetes | Sphingobacteria                                               | Sphingobacteriales | Flexibacteraceae    | Hymenobacter              |  |
| 507                      | 0  | 0   | 2   | Bacteroidetes | Sphingobacteria                                               | Sphingobacteriales | Flexibacteraceae    | Hymenobacter              |  |
| 516                      | 0  | 3   | 0   | Bacteroidetes | Sphingobacteria                                               | Sphingobacteriales | Chitinophagaceae    | unclassified              |  |
| 526                      | 1  | 0   | 0   | Bacteroidetes | Sphingobacteria                                               | Sphingobacteriales | Flexibacteraceae    | Spirosoma                 |  |
| 534                      | 0  | 1   | 0   | Bacteroidetes | Sphingobacteria                                               | Sphingobacteriales | Flexibacteraceae    | Hymenobacter              |  |
| 545                      | 0  | 0   | 2   | Bacteroidetes | Sphingobacteria                                               | Sphingobacteriales | Flexibacteraceae    | Hymenobacter              |  |
| 546                      | 0  | 2   | 1   | Bacteroidetes | Sphingobacteria                                               | Sphingobacteriales | Flexibacteraceae    | Hymenobacter              |  |
| 551                      | 2  | 0   | 1   | Bacteroidetes | Sphingobacteria                                               | Sphingobacteriales | Flexibacteraceae    | Hymenobacter              |  |
| 554                      | 0  | 0   | 1   | Bacteroidetes | Sphingobacteria                                               | Sphingobacteriales | Chitinophagaceae    | unclassified              |  |
| 555                      | 3  | 0   | 0   | Bacteroidetes | Flavobacteria                                                 | Flavobacteriales   | Flavobacteriaceae   | Wautersiella              |  |
| 569                      | 2  | 5   | 2   | Bacteroidetes | Sphingobacteria                                               | Sphingobacteriales | Rhodothermaceae     | unclassified              |  |
| 572                      | 0  | 2   | 0   | Bacteroidetes | Sphingobacteria                                               | Sphingobacteriales | Flexibacteraceae    | unclassified              |  |
| 573                      | 0  | 0   | 2   | Bacteroidetes | Sphingobacteria                                               | Sphingobacteriales | Flexibacteraceae    | unclassified              |  |
| 586                      | 0  | 0   | 0   | Bacteroidetes | Sphingobacteria                                               | Sphingobacteriales | Saprospiraceae      | unclassified              |  |
| 589                      | 1  | 0   | 0   | Bacteroidetes | Sphingobacteria                                               | Sphingobacteriales | Flexibacteraceae    | Hymenobacter              |  |
| 593                      | 7  | 0   | 0   | Bacteroidetes | Bacteroidia                                                   | Bacteroidales      | Rikenellaceae       | unclassified              |  |
| 599                      | 0  | 1   | 0   | Bacteroidetes | Flavobacteria                                                 | Flavobacteriales   | Flavobacteriaceae   | Capnocytophaga            |  |
| 615                      | 0  | 2   | 0   | Bacteroidetes | Bacteroidia                                                   | Bacteroidales      | Rikenellaceae       | unclassified              |  |
| 625                      | 0  | 0   | 1   | Bacteroidetes | Sphingobacteria                                               | Sphingobacteriales | Rhodothermaceae     | unclassified              |  |
| 625                      | 0  | 2   | 1   | Bacteroidetes | Sphingobacteria                                               | Sphingobacteriales | Flexibacteraceae    | Hymenobacter              |  |
| 637                      | 0  | 0   | 1   | Bacteroidetes | Sphingobacteria                                               | Sphingobacteriales | Flexibacteraceae    | Spirosoma                 |  |
| 648                      | 0  | 2   | 6   | Bacteroidetes | Sphingobacteria                                               | Sphingobacteriales | Flexibacteraceae    | Hymenobacter              |  |
| 671                      | 0  | 3   | 0   | Bacteroidetes | Bacteroidia                                                   | Bacteroidales      | Porphyromonadaceae  | Candidatus Azobacteroides |  |
| 679                      | 0  | 0   | 2   | Bacteroidetes | Bacteroidia                                                   | Bacteroidales      | unclassified        | unclassified              |  |
| 689                      | 2  | 0   | 0   | Bacteroidetes | Sphingobacteria                                               | Sphingobacteriales | Flexibacteraceae    | Cytophaga                 |  |
| 693                      | 0  | 0   | 1   | Bacteroidetes | Sphingobacteria                                               | Sphingobacteriales | unclassified        | unclassified              |  |
| 702                      | 0  | 0   | 1   | Bacteroidetes | Sphingobacteria                                               | Sphingobacteriales | Flexibacteraceae    | Spirosoma                 |  |
| 704                      | 0  | 0   | 1   | Bacteroidetes | Sphingobacteria                                               | Sphingobacteriales | Chitinophagaceae    | Segittibacter             |  |
| 710                      | 0  | 3   | 0   | Bacteroidetes | Sphingobacteria                                               | Sphingobacteriales | Flexibacteraceae    | Cytophaga                 |  |
| 723                      | 1  | 0   | 0   | Bacteroidetes | Sphingobacteria                                               | Sphingobacteriales | Flexibacteraceae    | Dyadobacter               |  |
|                          | 0  | 0   | 1   | Bacteroidetes | Bacteroidia                                                   | Bacteroidales      | Rikenellaceae       | unclassified              |  |
|                          | 1  | 5   | 1   | Bacteroidetes | Sphingobacteria                                               | Sphingobacteriales | Flexibacteraceae    | Dyadobacter               |  |
|                          | 0  | 2   | 0   | Bacteroidetes | Sphingobacteria                                               | Sphingobacteriales | Chitinophagaceae    | unclassified              |  |
|                          | 0  | 0   | 2   | Bacteroidetes | Sphingobacteria                                               | Sphingobacteriales | unclassified        | unclassified              |  |
|                          | 0  | 0   | 0   | Bacteroidetes | Flavobacteria                                                 | Flavobacteriales   | Flavobacteriaceae   | Aequorivita               |  |
|                          | 0  | 2   | 0   | Bacteroidetes | Bacteroidia                                                   | Bacteroidales      | Bacteroidaceae      | Bacteroides               |  |
|                          | 1  | 2   | 0   | Bacteroidetes | Flavobacteria                                                 | Flavobacteriales   | Flavobacteriaceae   | Flavobacterium            |  |
|                          | 1  | 0   | 0   | Bacteroidetes | Flavobacteria                                                 | Flavobacteriales   | Flavobacteriaceae   | Flavobacterium            |  |
|                          | 0  | 0   | 2   | Bacteroidetes | Sphingobacteria                                               | Sphingobacteriales | Sphingobacteriaceae | unclassified              |  |
|                          | 0  | 0   | 1   | Bacteroidetes | Bacteroidia                                                   | Bacteroidales      | Prevotellaceae      | Prevotella                |  |
|                          | 0  | 1   | 0   | Bacteroidetes | Sphingobacteria                                               | Sphingobacteriales | Flexibacteraceae    | unclassified              |  |
|                          | 8  | 0   | 8   | Bacteroidetes | Sphingobacteria                                               | Sphingobacteriales | Flexibacteraceae    | Hymenobacter              |  |
|                          | 0  | 2   | 0   | Bacteroidetes | Sphingobacteria                                               | Sphingobacteriales | Chitinophagaceae    | unclassified              |  |
|                          | 0  | 8   | 1   | Bacteroidetes | Sphingobacteria                                               | Sphingobacteriales | Flexibacteraceae    | Cytophaga                 |  |
|                          | 7  | 0   | 0   | Bacteroidetes | Sphingobacteria                                               | Sphingobacteriales | Saprospiraceae      | unclassified              |  |
|                          | 1  | 0   | 0   | Bacteroidetes | Bacteroidia                                                   | Bacteroidales      | Rikenellaceae       | unclassified              |  |
|                          | 0  | 2   | 0   | Bacteroidetes | Sphingobacteria                                               | Sphingobacteriales | Flexibacteraceae    | Hymenobacter              |  |
|                          | 5  | 0   | 0   | Bacteroidetes | Sphingobacteria                                               | Sphingobacteriales | Chitinophagaceae    | unclassified              |  |
|                          | 0  | 0   | 0   | Bacteroidetes | Sphingobacteria                                               | Sphingobacteriales | Chitinophagaceae    | unclassified              |  |
|                          | 22 | 0   | 0   | Bacteroidetes | Bacteroidia                                                   | Bacteroidales      | Porphyromonadaceae  | unclassified              |  |
|                          | 1  | 0   | 0   | Bacteroidetes | Sphingobacteria                                               | Sphingobacteriales | Flexibacteraceae    | Cytophaga                 |  |
|                          | 0  | 0   | 2   | Bacteroidetes | Flavobacteria                                                 | Flavobacteriales   | Flavobacteriaceae   | Flavobacterium            |  |
|                          | 1  | 1   | 7   | Bacteroidetes | Bacteroidia                                                   | Bacteroidales      | Prevotellaceae      | Prevotella                |  |
|                          | 1  | 4   | 1   | Bacteroidetes | Sphingobacteria                                               | Sphingobacteriales | unclassified        | unclassified              |  |
|                          | 1  | 0   | 1   | Bacteroidetes | Flavobacteria                                                 | Flavobacteriales   | Flavobacteriaceae   | Gelidibacter              |  |
|                          | 0  | 1   | 0   | Bacteroidetes | Sphingobacteria                                               | Sphingobacteriales | Chitinophagaceae    | unclassified              |  |
|                          | 0  | 0   | 1   | Bacteroidetes | Sphingobacteria                                               | Sphingobacteriales | Flexibacteraceae    | unclassified              |  |
|                          | 1  | 0   | 0   | Bacteroidetes | unclassified                                                  | unclassified       | unclassified        | unclassified              |  |
|                          | 0  | 2   | 0   | Bacteroidetes | Sphingobacteria                                               | Sphingobacteriales | Chitinophagaceae    | unclassified              |  |
|                          | 2  | 0   | 3   | Bacteroidetes | Sphingobacteria                                               | Sphingobacteriales | Flexibacteraceae    | unclassified              |  |
|                          | 0  | 5   | 0   | Bacteroidetes | Sphingobacteria                                               | Sphingobacteriales | Flexibacteraceae    | Cytophaga                 |  |
|                          | 2  | 0   | 0   | Bacteroidetes | Flavobacteria                                                 | Flavobacteriales   | Flavobacteriaceae   | Vastuella                 |  |
|                          | 0  | 1   | 0   | Bacteroidetes | Sphingobacteria                                               | Sphingobacteriales | Sphingobacteriaceae | Sphingobacterium          |  |
|                          | 1  | 0   | 0   | Bacteroidetes | Bacteroidia                                                   | Bacteroidales      | Prevotellaceae      | Prevotella                |  |
|                          | 1  | 0   | 0   | Bacteroidetes | Flavobacteria                                                 | Flavobacteriales   | Flavobacteriaceae   | unclassified              |  |
|                          | 0  | 2   | 0   | Bacteroidetes | Sphingobacteria                                               | Sphingobacteriales | Chitinophagaceae    | unclassified              |  |
|                          | 1  | 0   | 0   | Bacteroidetes | Sphingobacteria                                               | Sphingobacteriales | Sphingobacteriaceae | unclassified              |  |
|                          | 1  | 0   | 0   | Bacteroidetes | unclassified                                                  | unclassified       | unclassified        | unclassified              |  |
|                          | 0  | 1   | 0   | Bacteroidetes | Sphingobacteria                                               | Sphingobacteriales | Flexibacteraceae    | Hymenobacter              |  |
|                          | 2  | 0   | 0   | Bacteroidetes | Bacteroidia                                                   | Bacteroidales      | Saprospiraceae      | unclassified              |  |
|                          | 0  | 0   | 1   | Bacteroidetes | Bacteroidia                                                   | Bacteroidales      | Porphyromonadaceae  | Parabacteroides           |  |
|                          | 6  | 0   | 0   | Bacteroidetes | Flavobacteria                                                 | Flavobacteriales   | Flavobacteriaceae   | Flavobacterium            |  |
|                          | 0  | 0   | 1   | Bacteroidetes | Flavobacteria                                                 | Flavobacteriales   | Corymorphaeae       | unclassified              |  |
|                          | 1  | 0   | 0   | Bacteroidetes | Flavobacteria                                                 | Flavobacteriales   | Flavobacteriaceae   | Flavobacterium            |  |
|                          | 1  | 2   | 3   | Bacteroidetes | Sphingobacteria                                               | Sphingobacteriales | Sphingobacteriaceae | Pedobacter                |  |
|                          | 1  | 0   | 0   | Bacteroidetes | Flavobacteria                                                 | Flavobacteriales   | Flavobacteriaceae   | Chryseobacterium          |  |
|                          | 2  | 1   | 0   | Bacteroidetes | Sphingobacteria                                               | Sphingobacteriales | Chitinophagaceae    | unclassified              |  |
|                          | 1  | 0   | 0   | Bacteroidetes | Sphingobacteria                                               | Sphingobacteriales | Chitinophagaceae    | unclassified              |  |
|                          | 0  | 0   | 1   | Bacteroidetes | Flavobacteria                                                 | Flavobacteriales   | Flavobacteriaceae   | Flavobacterium            |  |
|                          | 0  | 0   | 1   | Bacteroidetes | Bacteroidia                                                   | Bacteroidales      | Prevotellaceae      | Prevotella                |  |
|                          | 0  | 0   | 0   | Bacteroidetes | Sphingobacteria                                               | Sphingobacteriales | Chitinophagaceae    | unclassified              |  |
|                          | 5  | 0   | 0   | Bacteroidetes | unclassified                                                  | unclassified       | unclassified        | unclassified              |  |
|                          | 1  | 0   | 1   | Bacteroidetes | Sphingobacteria                                               | Sphingobacteriales | Flexibacteraceae    | Hymenobacter              |  |
|                          | 1  | 0   | 0   | Bacteroidetes | Sphingobacteria                                               | Sphingobacteriales | Flexibacteraceae    | unclassified              |  |
|                          | 1  | 0   | 0   | Bacteroidetes | Flavobacteria                                                 | Flavobacteriales   | Flavobacteriaceae   | Gillisia                  |  |
|                          | 0  | 2   | 0   | Bacteroidetes | Sphingobacteria                                               | Sphingobacteriales | Flexibacteraceae    | unclassified              |  |

Table S5 (part I): OTUs, no. of reads and corresponding taxonomic affiliation of detected bacterial 16S rRNA amplicons by 454 pyrotag sequencing. Please note, the data shown here was either rank normalized or sum normalized (to 5000 reads per sample) before performing statistical analysis as depicted in the manuscript.

| Samples and no. of reads |     |    |     |     | taxonomic classification of bacterial 16S rRNA gene amplicons |                 |                    |                     |                  |
|--------------------------|-----|----|-----|-----|---------------------------------------------------------------|-----------------|--------------------|---------------------|------------------|
| OTU                      | URI | CO | CRS | CRS | phylum                                                        | class           | order              | family              | genus            |
| 1180                     | 0   | 2  | 0   | 0   | Bacteroidetes                                                 | Sphingobacteria | Sphingobacteriales | Flexibacteraceae    | Spirosoma        |
| 1182                     | 0   | 0  | 3   | 5   | Bacteroidetes                                                 | Bacteroidia     | Bacteroidales      | Prevotellaceae      | Prevotella       |
| 1184                     | 0   | 0  | 1   | 0   | Bacteroidetes                                                 | Sphingobacteria | Sphingobacteriales | Sphingobacteriaceae | unclassified     |
| 1188                     | 0   | 0  | 0   | 1   | Bacteroidetes                                                 | Flavobacteria   | Flavobacteriales   | Flavobacteriaceae   | Flavobacterium   |
| 1200                     | 0   | 0  | 0   | 2   | Bacteroidetes                                                 | Sphingobacteria | Sphingobacteriales | Flexibacteraceae    | Hymenobacter     |
| 1213                     | 0   | 1  | 0   | 1   | Bacteroidetes                                                 | Sphingobacteria | Sphingobacteriales | Sphingobacteriaceae | Sphingobacterium |
| 1217                     | 0   | 0  | 0   | 0   | Bacteroidetes                                                 | Sphingobacteria | Sphingobacteriales | Saprospiraceae      | unclassified     |
| 1218                     | 0   | 1  | 0   | 0   | Bacteroidetes                                                 | Flavobacteria   | Flavobacteriales   | Flavobacteriaceae   | Sejongia         |
| 1224                     | 0   | 0  | 5   | 0   | Bacteroidetes                                                 | Sphingobacteria | Sphingobacteriales | unclassified        | unclassified     |
| 1231                     | 0   | 1  | 0   | 0   | Bacteroidetes                                                 | Flavobacteria   | Flavobacteriales   | Flavobacteriaceae   | Aequorivita      |
| 1233                     | 0   | 0  | 0   | 1   | Bacteroidetes                                                 | Bacteroidia     | Bacteroidales      | Bacteroidaceae      | unclassified     |
| 1244                     | 0   | 1  | 0   | 0   | Bacteroidetes                                                 | Flavobacteria   | Flavobacteriales   | Corynebacteriaceae  | unclassified     |
| 1250                     | 0   | 0  | 1   | 1   | Bacteroidetes                                                 | Bacteroidia     | Bacteroidales      | Prevotellaceae      | Prevotella       |
| 1252                     | 1   | 0  | 0   | 0   | Bacteroidetes                                                 | Sphingobacteria | Sphingobacteriales | unclassified        | unclassified     |
| 1257                     | 0   | 1  | 0   | 0   | Bacteroidetes                                                 | Flavobacteria   | Flavobacteriales   | Flavobacteriaceae   | Arenibacter      |
| 1258                     | 0   | 0  | 1   | 0   | Bacteroidetes                                                 | Sphingobacteria | Sphingobacteriales | Hymenobacter        | Hymenobacter     |
| 1262                     | 0   | 0  | 1   | 0   | Bacteroidetes                                                 | Flavobacteria   | Flavobacteriales   | Flavobacteriaceae   | Flavobacterium   |
| 1264                     | 0   | 1  | 0   | 1   | Bacteroidetes                                                 | Sphingobacteria | Sphingobacteriales | unclassified        | unclassified     |
| 1273                     | 0   | 1  | 2   | 0   | Bacteroidetes                                                 | Bacteroidia     | Bacteroidales      | unclassified        | unclassified     |
| 1274                     | 0   | 0  | 0   | 2   | Bacteroidetes                                                 | Sphingobacteria | Sphingobacteriales | Hymenobacter        | Hymenobacter     |
| 1286                     | 0   | 0  | 0   | 0   | Bacteroidetes                                                 | Sphingobacteria | Sphingobacteriales | Cyclobacteraceae    | unclassified     |
| 1287                     | 0   | 3  | 0   | 0   | Bacteroidetes                                                 | Sphingobacteria | Sphingobacteriales | Flexibacteraceae    | Spirosoma        |
| 1297                     | 0   | 0  | 2   | 0   | Bacteroidetes                                                 | Sphingobacteria | Sphingobacteriales | Chitinophagaceae    | unclassified     |
| 1298                     | 0   | 1  | 0   | 0   | Bacteroidetes                                                 | Sphingobacteria | Sphingobacteriales | unclassified        | unclassified     |
| 1300                     | 0   | 0  | 0   | 1   | Bacteroidetes                                                 | Sphingobacteria | Sphingobacteriales | Flexibacteraceae    | Spirosoma        |
| 1303                     | 2   | 2  | 1   | 1   | Bacteroidetes                                                 | Flavobacteria   | Flavobacteriales   | Flavobacteriaceae   | Chryseobacterium |
| 1320                     | 0   | 0  | 0   | 1   | Bacteroidetes                                                 | Sphingobacteria | Sphingobacteriales | Flexibacteraceae    | unclassified     |
| 1330                     | 0   | 0  | 0   | 1   | Bacteroidetes                                                 | Bacteroidia     | Bacteroidales      | unclassified        | unclassified     |
| 1333                     | 0   | 6  | 0   | 0   | Bacteroidetes                                                 | Sphingobacteria | Sphingobacteriales | Chitinophagaceae    | unclassified     |
| 1345                     | 0   | 0  | 1   | 0   | Bacteroidetes                                                 | Sphingobacteria | Sphingobacteriales | unclassified        | unclassified     |
| 1351                     | 1   | 0  | 0   | 0   | Bacteroidetes                                                 | Sphingobacteria | Sphingobacteriales | Flexibacteraceae    | Spirosoma        |
| 1352                     | 1   | 0  | 0   | 0   | Bacteroidetes                                                 | Sphingobacteria | Sphingobacteriales | Sphingobacteriaceae | Sphingobacterium |
| 1356                     | 0   | 0  | 0   | 4   | Bacteroidetes                                                 | Sphingobacteria | Sphingobacteriales | Chitinophagaceae    | unclassified     |
| 1359                     | 0   | 0  | 0   | 1   | Bacteroidetes                                                 | Bacteroidia     | Bacteroidales      | Prevotellaceae      | Prevotella       |
| 1363                     | 0   | 1  | 0   | 0   | Bacteroidetes                                                 | unclassified    | unclassified       | unclassified        | unclassified     |
| 1364                     | 0   | 5  | 0   | 0   | Bacteroidetes                                                 | Bacteroidia     | Bacteroidales      | Mannibacteriaceae   | unclassified     |
| 1366                     | 1   | 6  | 0   | 3   | Bacteroidetes                                                 | Sphingobacteria | Sphingobacteriales | Flexibacteraceae    | Hymenobacter     |
| 1382                     | 0   | 2  | 7   | 2   | Bacteroidetes                                                 | Sphingobacteria | Sphingobacteriales | Flexibacteraceae    | Hymenobacter     |
| 1393                     | 0   | 2  | 1   | 0   | Bacteroidetes                                                 | Sphingobacteria | Sphingobacteriales | Saprospiraceae      | unclassified     |
| 1396                     | 0   | 8  | 0   | 0   | Bacteroidetes                                                 | Flavobacteria   | Flavobacteriales   | Flavobacteriaceae   | Aequorivita      |
| 1400                     | 0   | 0  | 1   | 0   | Bacteroidetes                                                 | Bacteroidia     | Bacteroidales      | Porphyromonadaceae  | unclassified     |
| 1401                     | 0   | 6  | 0   | 0   | Bacteroidetes                                                 | Sphingobacteria | Sphingobacteriales | Cytophagaceae       | unclassified     |
| 1424                     | 0   | 5  | 0   | 0   | Bacteroidetes                                                 | Flavobacteria   | Flavobacteriales   | Flavobacteriaceae   | unclassified     |
| 1434                     | 0   | 1  | 0   | 0   | Bacteroidetes                                                 | Sphingobacteria | Sphingobacteriales | Flammovibrionaceae  | unclassified     |
| 1444                     | 0   | 4  | 0   | 0   | Bacteroidetes                                                 | Sphingobacteria | Sphingobacteriales | Sphingobacteriaceae | unclassified     |
| 1452                     | 0   | 1  | 0   | 2   | Bacteroidetes                                                 | Sphingobacteria | Sphingobacteriales | Hymenobacter        | Hymenobacter     |
| 1473                     | 1   | 3  | 0   | 2   | Bacteroidetes                                                 | Flavobacteria   | Flavobacteriales   | Flavobacteriaceae   | Chryseobacterium |
| 1480                     | 0   | 0  | 0   | 1   | Bacteroidetes                                                 | Sphingobacteria | Sphingobacteriales | Chitinophagaceae    | unclassified     |
| 1489                     | 0   | 7  | 0   | 0   | Bacteroidetes                                                 | Flavobacteria   | Flavobacteriales   | Flavobacteriaceae   | unclassified     |
| 1490                     | 0   | 2  | 0   | 0   | Bacteroidetes                                                 | Sphingobacteria | Sphingobacteriales | Sphingobacteriaceae | unclassified     |
| 1494                     | 0   | 2  | 0   | 0   | Bacteroidetes                                                 | Sphingobacteria | Sphingobacteriales | Chitinophagaceae    | Flavobacterium   |
| 1498                     | 0   | 1  | 0   | 0   | Bacteroidetes                                                 | Sphingobacteria | Sphingobacteriales | Chitinophagaceae    | unclassified     |
| 1499                     | 0   | 1  | 0   | 0   | Bacteroidetes                                                 | Bacteroidia     | Bacteroidales      | Prevotellaceae      | Prevotella       |
| 1500                     | 0   | 3  | 0   | 0   | Bacteroidetes                                                 | Bacteroidia     | Bacteroidales      | Porphyromonadaceae  | unclassified     |
| 1502                     | 0   | 2  | 0   | 0   | Bacteroidetes                                                 | Sphingobacteria | Sphingobacteriales | unclassified        | unclassified     |
| 1525                     | 0   | 0  | 1   | 0   | Bacteroidetes                                                 | Sphingobacteria | Sphingobacteriales | Saprospiraceae      | unclassified     |
| 1544                     | 0   | 1  | 0   | 0   | Bacteroidetes                                                 | Sphingobacteria | Sphingobacteriales | Flexibacteraceae    | Spirosoma        |
| 1547                     | 0   | 0  | 2   | 0   | Bacteroidetes                                                 | Sphingobacteria | Sphingobacteriales | Flexibacteraceae    | Spirosoma        |
| 1557                     | 0   | 0  | 0   | 1   | Bacteroidetes                                                 | Flavobacteria   | Flavobacteriales   | Flavobacteriaceae   | Capnocytophaga   |
| 1568                     | 0   | 0  | 0   | 1   | Bacteroidetes                                                 | Sphingobacteria | Sphingobacteriales | Chitinophagaceae    | unclassified     |
| 1574                     | 0   | 11 | 0   | 0   | Bacteroidetes                                                 | Flavobacteria   | Flavobacteriales   | Flavobacteriaceae   | unclassified     |
| 1576                     | 1   | 0  | 0   | 0   | Bacteroidetes                                                 | Sphingobacteria | Sphingobacteriales | Saprospiraceae      | unclassified     |
| 1585                     | 0   | 0  | 0   | 2   | Bacteroidetes                                                 | Sphingobacteria | Sphingobacteriales | Chitinophagaceae    | unclassified     |
| 1596                     | 0   | 1  | 0   | 0   | Bacteroidetes                                                 | Bacteroidia     | Bacteroidales      | Porphyromonadaceae  | Parabacteroides  |
| 1610                     | 0   | 1  | 0   | 0   | Bacteroidetes                                                 | unclassified    | unclassified       | unclassified        | unclassified     |
| 1615                     | 0   | 0  | 3   | 0   | Bacteroidetes                                                 | Sphingobacteria | Sphingobacteriales | Flexibacteraceae    | Entidicia        |
| 1616                     | 0   | 3  | 0   | 0   | Bacteroidetes                                                 | Sphingobacteria | Sphingobacteriales | Chitinophagaceae    | unclassified     |
| 1622                     | 0   | 0  | 12  | 0   | Bacteroidetes                                                 | Bacteroidia     | Bacteroidales      | Prevotellaceae      | Prevotella       |
| 1626                     | 0   | 2  | 0   | 0   | Bacteroidetes                                                 | unclassified    | unclassified       | unclassified        | unclassified     |
| 1630                     | 0   | 0  | 0   | 1   | Bacteroidetes                                                 | Sphingobacteria | Sphingobacteriales | Flexibacteraceae    | unclassified     |
| 1635                     | 0   | 2  | 0   | 0   | Bacteroidetes                                                 | unclassified    | unclassified       | unclassified        | unclassified     |
| 1653                     | 0   | 0  | 0   | 4   | Bacteroidetes                                                 | Bacteroidia     | Bacteroidales      | Prevotellaceae      | Prevotella       |
| 1663                     | 0   | 0  | 1   | 0   | Bacteroidetes                                                 | Sphingobacteria | Sphingobacteriales | Chitinophagaceae    | unclassified     |
| 1668                     | 0   | 0  | 0   | 1   | Bacteroidetes                                                 | Sphingobacteria | Sphingobacteriales | Sphingobacteriaceae | unclassified     |
| 1669                     | 1   | 0  | 1   | 9   | Bacteroidetes                                                 | Bacteroidia     | Bacteroidales      | Prevotellaceae      | Prevotella       |
| 1677                     | 0   | 0  | 0   | 3   | Bacteroidetes                                                 | Bacteroidia     | Bacteroidales      | Bacteroidaceae      | Bacteroides      |
| 1699                     | 0   | 0  | 1   | 1   | Bacteroidetes                                                 | Sphingobacteria | Sphingobacteriales | Flexibacteraceae    | unclassified     |
| 1700                     | 0   | 0  | 0   | 1   | Bacteroidetes                                                 | Sphingobacteria | Sphingobacteriales | Flexibacteraceae    | Spirosoma        |
| 1720                     | 0   | 1  | 1   | 0   | Bacteroidetes                                                 | Sphingobacteria | Sphingobacteriales | unclassified        | unclassified     |
| 1721                     | 0   | 3  | 0   | 0   | Bacteroidetes                                                 | Sphingobacteria | Sphingobacteriales | Chitinophagaceae    | unclassified     |
| 955                      | 0   | 1  | 0   | 0   | Chlorobi                                                      | PRR-11          | unclassified       | unclassified        | unclassified     |
| 19                       | 0   | 2  | 0   | 0   | Chlorobi                                                      | Chlorobia       | Chlorobiales       | unclassified        | unclassified     |
| 373                      | 0   | 2  | 1   | 0   | Chlorobi                                                      | Chlorobia       | Chlorobiales       | SA-28               | unclassified     |
| 703                      | 0   | 0  | 0   | 1   | Chlorobi                                                      | Chlorobi        | Chlorobiales       | unclassified        | unclassified     |
| 3                        | 0   | 0  | 2   | 0   | Chloroflexi                                                   | Anaerolineae    | Anaerolineales     | AAB                 | unclassified     |
| 96                       | 0   | 2  | 0   | 1   | Chloroflexi                                                   | SOGA31          | unclassified       | unclassified        | unclassified     |
| 298                      | 0   | 1  | 0   | 0   | Chloroflexi                                                   | Chloroflexi     | Herpetosiphonales  | Herpetosiphonaceae  | Herpetosiphon    |
| 356                      | 0   | 1  | 0   | 0   | Chloroflexi                                                   | Chloroflexi     | Chloroflexiales    | unclassified        | unclassified     |
| 623                      | 0   | 2  | 0   | 0   | Chloroflexi                                                   | Anaerolineae    | Anaerolineales     | unclassified        | unclassified     |
| 674                      | 1   | 0  | 0   | 0   | Chloroflexi                                                   | Thermomicrobia  | Sphaerobacteriales | Sphaerobacteriaceae | HN-15            |
| 865                      | 0   | 1  | 0   | 1   | Chloroflexi                                                   | SOGA31          | unclassified       | unclassified        | unclassified     |
| 957                      | 0   | 4  | 0   | 0   | Chloroflexi                                                   | Thermomicrobia  | Sphaerobacteriales | Sphaerobacteriaceae | HN-15            |
| 1084                     | 0   | 0  | 0   | 1   | Chloroflexi                                                   | Chloroflexi     | Chloroflexiales    | Roseiflexus         | unclassified     |
| 1107                     | 0   | 1  | 1   | 0   | Chloroflexi                                                   | Thermomicrobia  | Sphaerobacteriales | Sphaerobacteriaceae | HN-15            |
| 1113                     | 0   | 1  | 0   | 0   | Chloroflexi                                                   | SOGA31          | unclassified       | unclassified        | unclassified     |
| 1171                     | 0   | 8  | 0   | 0   | Chloroflexi                                                   | Thermomicrobia  | Sphaerobacteriales | Sphaerobacteriaceae | HN-15            |
| 1385                     | 0   | 1  | 0   | 0   | Chloroflexi                                                   | BN112           | unclassified       | unclassified        | unclassified     |
| 1423                     | 0   | 0  | 2   | 0   | Anaerolineae                                                  | Anaerolineae    | Anaerolineales     | HN-15               | unclassified     |
| 1453                     | 0   | 0  | 0   | 1   | Chloroflexi                                                   | Thermomicrobia  | Sphaerobacteriales | Sphaerobacteriaceae | HN-15            |
| 1476                     | 0   | 1  | 0   | 0   | Chloroflexi                                                   | Anaerolineae    | Anaerolineales     | Anaerolineales      | AAB              |

Table S5 (part I): OTUs, no. of reads and corresponding taxonomic affiliation of detected bacterial 16S rRNA amplicons by 454 pyrotag sequencing. Please note, the data shown here was either rank normalized or sum normalized (to 5000 reads per sample) before performing statistical analysis as depicted in the manuscript.

| Samples and no. of reads |    |    |     |     | taxonomic classification of bacterial 16S rRNA gene amplicons |                      |                  |                                          |                   |
|--------------------------|----|----|-----|-----|---------------------------------------------------------------|----------------------|------------------|------------------------------------------|-------------------|
| OTU                      | UR | CO | CRS | CRS | phylum                                                        | class                | order            | family                                   | genus             |
| 520                      | 0  | 1  | 0   | 0   | Chloroflexi                                                   | Anaerolineae         | Anaerolineales   | Anaerolineaceae                          | Anaerolinea       |
| 583                      | 0  | 0  | 0   | 1   | Chloroflexi                                                   | TK17                 | unclassified     | unclassified                             | unclassified      |
| 603                      | 0  | 0  | 2   | 0   | Chloroflexi                                                   | unclassified         | unclassified     | unclassified                             | unclassified      |
| 102                      | 10 | 0  | 0   | 0   | Cyanobacteria                                                 | Nostocophycidae      | Nostocales       | unclassified                             | unclassified      |
| 48                       | 0  | 0  | 0   | 3   | Cyanobacteria                                                 | Synechococophycidae  | Pseudanabaenales | Pseudanabaenaceae                        | Leptolyngbya      |
| 64                       | 0  | 1  | 0   | 1   | Cyanobacteria                                                 | Oscillatoriophycidae | Chroococcales    | Xenococcaceae                            | Chroococcoidopsis |
| 70                       | 0  | 3  | 0   | 5   | Cyanobacteria                                                 | unclassified         | unclassified     | unclassified                             | unclassified      |
| 73                       | 0  | 0  | 1   | 2   | Cyanobacteria                                                 | Oscillatoriophycidae | Chroococcales    | Xenococcaceae                            | Chroococcoidopsis |
| 107                      | 0  | 1  | 0   | 0   | Cyanobacteria                                                 | Synechococophycidae  | Pseudanabaenales | Pseudanabaenaceae                        | unclassified      |
| 30                       | 0  | 4  | 0   | 0   | Cyanobacteria                                                 | unclassified         | unclassified     | unclassified                             | unclassified      |
| 306                      | 0  | 0  | 0   | 1   | Cyanobacteria                                                 | Oscillatoriophycidae | Chroococcales    | Xenococcaceae                            | unclassified      |
| 14                       | 0  | 20 | 2   | 6   | Cyanobacteria                                                 | Oscillatoriophycidae | Chroococcales    | Xenococcaceae                            | Chroococcoidopsis |
| 51                       | 0  | 1  | 0   | 0   | Cyanobacteria                                                 | Chloroplast          | Streptophyta     | unclassified                             | unclassified      |
| 87                       | 0  | 3  | 0   | 0   | Cyanobacteria                                                 | Synechococophycidae  | Pseudanabaenales | Pseudanabaenaceae                        | unclassified      |
| 403                      | 0  | 0  | 0   | 2   | Cyanobacteria                                                 | Synechococophycidae  | Pseudanabaenales | Pseudanabaenaceae                        | Leptolyngbya      |
| 426                      | 0  | 1  | 1   | 0   | Cyanobacteria                                                 | Synechococophycidae  | Pseudanabaenales | Pseudanabaenaceae                        | Leptolyngbya      |
| 430                      | 0  | 0  | 1   | 0   | Cyanobacteria                                                 | Chloroplast          | unclassified     | unclassified                             | unclassified      |
| 437                      | 0  | 0  | 0   | 1   | Cyanobacteria                                                 | unclassified         | unclassified     | unclassified                             | unclassified      |
| 444                      | 0  | 1  | 0   | 2   | Cyanobacteria                                                 | Synechococophycidae  | Pseudanabaenales | Pseudanabaenaceae                        | Leptolyngbya      |
| 477                      | 1  | 4  | 0   | 2   | Cyanobacteria                                                 | Synechococophycidae  | Pseudanabaenales | Pseudanabaenaceae                        | Pseudanabaenaceae |
| 486                      | 0  | 3  | 0   | 0   | Cyanobacteria                                                 | Oscillatoriophycidae | unclassified     | unclassified                             | unclassified      |
| 524                      | 0  | 2  | 0   | 0   | Cyanobacteria                                                 | unclassified         | unclassified     | unclassified                             | unclassified      |
| 527                      | 0  | 13 | 0   | 0   | Cyanobacteria                                                 | Nostocophycidae      | Nostocales       | Nostocaceae                              | Nostoc            |
| 530                      | 0  | 5  | 2   | 4   | Cyanobacteria                                                 | Oscillatoriophycidae | Oscillatoriales  | Phormidiaceae                            | Phormidium        |
| 542                      | 0  | 2  | 0   | 0   | Cyanobacteria                                                 | Oscillatoriophycidae | Oscillatoriales  | Phormidiaceae                            | Phormidium        |
| 543                      | 0  | 1  | 0   | 0   | Cyanobacteria                                                 | Synechococophycidae  | Pseudanabaenales | Pseudanabaenaceae                        | Pseudanabaenaceae |
| 584                      | 0  | 0  | 0   | 3   | Cyanobacteria                                                 | Oscillatoriophycidae | unclassified     | unclassified                             | unclassified      |
| 591                      | 0  | 1  | 0   | 0   | Cyanobacteria                                                 | Oscillatoriophycidae | Chroococcales    | Xenococcaceae                            | Chroococcoidopsis |
| 594                      | 0  | 8  | 0   | 0   | Cyanobacteria                                                 | Oscillatoriophycidae | Oscillatoriales  | Phormidiaceae                            | Phormidium        |
| 604                      | 0  | 0  | 3   | 5   | Cyanobacteria                                                 | Chloroplast          | Chlorophyta      | Trebuxiophyceae                          | unclassified      |
| 614                      | 0  | 1  | 0   | 0   | Cyanobacteria                                                 | Synechococophycidae  | Pseudanabaenales | Pseudanabaenaceae                        | Leptolyngbya      |
| 641                      | 0  | 0  | 1   | 0   | Cyanobacteria                                                 | 4C0d-2               | SM1D11           | unclassified                             | unclassified      |
| 646                      | 0  | 0  | 0   | 7   | Cyanobacteria                                                 | Oscillatoriophycidae | Chroococcales    | Xenococcaceae                            | Chroococcoidopsis |
| 676                      | 0  | 1  | 0   | 0   | Cyanobacteria                                                 | Oscillatoriophycidae | Chroococcales    | Xenococcaceae                            | Chroococcoidopsis |
| 744                      | 0  | 2  | 0   | 0   | Cyanobacteria                                                 | Synechococophycidae  | Pseudanabaenales | Pseudanabaenaceae                        | Pseudanabaenaceae |
| 761                      | 0  | 0  | 3   | 0   | Cyanobacteria                                                 | 4C0d-2               | mle-12           | unclassified                             | unclassified      |
| 774                      | 0  | 1  | 0   | 0   | Cyanobacteria                                                 | Oscillatoriophycidae | Chroococcales    | Xenococcaceae                            | Chroococcoidopsis |
| 793                      | 0  | 0  | 2   | 0   | Cyanobacteria                                                 | Chloroplast          | Stramenopiles    | unclassified                             | unclassified      |
| 808                      | 0  | 0  | 0   | 3   | Cyanobacteria                                                 | unclassified         | unclassified     | unclassified                             | unclassified      |
| 821                      | 0  | 4  | 0   | 2   | Cyanobacteria                                                 | Synechococophycidae  | Pseudanabaenales | Pseudanabaenaceae                        | Leptolyngbya      |
| 828                      | 0  | 3  | 0   | 0   | Cyanobacteria                                                 | Nostocophycidae      | Nostocales       | Nostocaceae                              | Nostoc            |
| 847                      | 0  | 1  | 0   | 0   | Cyanobacteria                                                 | unclassified         | unclassified     | unclassified                             | unclassified      |
| 862                      | 0  | 3  | 4   | 1   | Cyanobacteria                                                 | Chloroplast          | Chlorophyta      | Trebuxiophyceae                          | unclassified      |
| 1072                     | 0  | 0  | 2   | 0   | Cyanobacteria                                                 | Chloroplast          | Chlorophyta      | Trebuxiophyceae                          | unclassified      |
| 1099                     | 0  | 1  | 0   | 0   | Cyanobacteria                                                 | unclassified         | unclassified     | unclassified                             | unclassified      |
| 1101                     | 16 | 8  | 6   | 6   | Cyanobacteria                                                 | Oscillatoriophycidae | unclassified     | unclassified                             | unclassified      |
| 1106                     | 0  | 2  | 0   | 3   | Cyanobacteria                                                 | unclassified         | unclassified     | unclassified                             | unclassified      |
| 1108                     | 0  | 0  | 9   | 9   | Cyanobacteria                                                 | unclassified         | unclassified     | unclassified                             | unclassified      |
| 140                      | 0  | 0  | 0   | 0   | Cyanobacteria                                                 | Chloroplast          | Stramenopiles    | unclassified                             | unclassified      |
| 145                      | 0  | 1  | 0   | 0   | Cyanobacteria                                                 | unclassified         | unclassified     | unclassified                             | unclassified      |
| 163                      | 0  | 0  | 0   | 1   | Cyanobacteria                                                 | Oscillatoriophycidae | unclassified     | unclassified                             | unclassified      |
| 235                      | 0  | 0  | 0   | 1   | Cyanobacteria                                                 | Synechococophycidae  | Pseudanabaenales | Pseudanabaenaceae                        | unclassified      |
| 236                      | 1  | 4  | 0   | 0   | Cyanobacteria                                                 | Oscillatoriophycidae | Chroococcales    | Microcystaceae                           | unclassified      |
| 245                      | 0  | 0  | 1   | 0   | Cyanobacteria                                                 | Oscillatoriophycidae | Oscillatoriales  | Phormidiaceae                            | unclassified      |
| 290                      | 0  | 2  | 3   | 3   | Cyanobacteria                                                 | Oscillatoriophycidae | Oscillatoriales  | Phormidiaceae                            | Phormidium        |
| 324                      | 0  | 2  | 0   | 0   | Cyanobacteria                                                 | Synechococophycidae  | Pseudanabaenales | Pseudanabaenaceae                        | Leptolyngbya      |
| 326                      | 0  | 0  | 2   | 5   | Cyanobacteria                                                 | Chloroplast          | Streptophyta     | unclassified                             | unclassified      |
| 337                      | 1  | 6  | 2   | 0   | Cyanobacteria                                                 | Nostocophycidae      | Nostocales       | Rivulariaceae                            | Calothrix         |
| 340                      | 0  | 0  | 0   | 2   | Cyanobacteria                                                 | unclassified         | unclassified     | unclassified                             | unclassified      |
| 383                      | 0  | 0  | 2   | 0   | Cyanobacteria                                                 | S158-MN24            | unclassified     | unclassified                             | unclassified      |
| 415                      | 0  | 0  | 0   | 1   | Cyanobacteria                                                 | Chloroplast          | Streptophyta     | unclassified                             | unclassified      |
| 416                      | 0  | 1  | 0   | 9   | Cyanobacteria                                                 | Synechococophycidae  | Pseudanabaenales | Pseudanabaenaceae                        | unclassified      |
| 429                      | 0  | 0  | 0   | 1   | Cyanobacteria                                                 | Oscillatoriophycidae | Xenococcaceae    | Chroococcoidopsis                        | Chroococcoidopsis |
| 436                      | 0  | 0  | 0   | 2   | Cyanobacteria                                                 | Synechococophycidae  | Pseudanabaenales | Pseudanabaenaceae                        | Leptolyngbya      |
| 481                      | 0  | 1  | 0   | 1   | Cyanobacteria                                                 | Oscillatoriophycidae | Chroococcales    | Xenococcaceae                            | Chroococcoidopsis |
| 508                      | 0  | 1  | 0   | 0   | Cyanobacteria                                                 | Synechococophycidae  | Pseudanabaenales | Pseudanabaenaceae                        | unclassified      |
| 521                      | 0  | 2  | 0   | 0   | Cyanobacteria                                                 | Chloroplast          | Chlorophyta      | Trebuxiophyceae                          | unclassified      |
| 533                      | 0  | 2  | 0   | 5   | Cyanobacteria                                                 | Synechococophycidae  | Pseudanabaenales | Pseudanabaenaceae                        | unclassified      |
| 542                      | 0  | 3  | 3   | 0   | Cyanobacteria                                                 | Nostocophycidae      | Nostocales       | Rivulariaceae                            | Calothrix         |
| 571                      | 0  | 0  | 0   | 1   | Cyanobacteria                                                 | Oscillatoriophycidae | Chroococcales    | Xenococcaceae                            | Chroococcoidopsis |
| 580                      | 0  | 5  | 7   | 14  | Cyanobacteria                                                 | Chloroplast          | Streptophyta     | unclassified                             | unclassified      |
| 608                      | 0  | 0  | 1   | 0   | Cyanobacteria                                                 | unclassified         | unclassified     | unclassified                             | unclassified      |
| 611                      | 0  | 2  | 1   | 3   | Cyanobacteria                                                 | Chloroplast          | unclassified     | unclassified                             | unclassified      |
| 625                      | 0  | 10 | 2   | 1   | Cyanobacteria                                                 | Chloroplast          | Streptophyta     | unclassified                             | unclassified      |
| 636                      | 0  | 3  | 0   | 1   | Cyanobacteria                                                 | Oscillatoriophycidae | Oscillatoriales  | Phormidiaceae                            | Phormidium        |
| 658                      | 3  | 0  | 0   | 0   | Cyanobacteria                                                 | Synechococophycidae  | Pseudanabaenales | Pseudanabaenaceae                        | Leptolyngbya      |
| 710                      | 0  | 1  | 0   | 1   | Cyanobacteria                                                 | unclassified         | unclassified     | unclassified                             | unclassified      |
| 711                      | 0  | 0  | 0   | 2   | Cyanobacteria                                                 | Oscillatoriophycidae | Chroococcales    | Xenococcaceae                            | unclassified      |
| 1                        | 1  | 2  | 0   | 0   | Firmicutes                                                    | Bacilli              | Bacillales       | Bacillaceae                              | Geobacillus       |
| 1                        | 0  | 0  | 9   | 0   | Firmicutes                                                    | Clostridia           | Clostridiales    | Ruminococcaceae                          | unclassified      |
| 1                        | 0  | 2  | 0   | 0   | Firmicutes                                                    | Clostridia           | Clostridiales    | Clostridiaceae                           | Alkaliphilus      |
| 2                        | 0  | 10 | 7   | 7   | Firmicutes                                                    | Bacilli              | Bacillales       | Staphylococcaceae                        | Jeikeiglobus      |
| 4                        | 0  | 0  | 1   | 0   | Firmicutes                                                    | Clostridia           | Clostridiales    | Clostridiales, Family XI, Incertae Sedis | Finegoldia        |
| 4                        | 0  | 0  | 1   | 4   | Firmicutes                                                    | Clostridia           | Clostridiales    | Lactobacillales                          | Lactobacillus     |
| 6                        | 0  | 0  | 1   | 0   | Firmicutes                                                    | Clostridia           | Clostridiales    | Clostridiales, Family XI, Incertae Sedis | Pegoniphilus      |
| 7                        | 3  | 9  | 6   | 4   | Firmicutes                                                    | Bacilli              | Gemellales       | Gemellaceae                              | Gemella           |
| 12                       | 0  | 1  | 0   | 0   | Firmicutes                                                    | Clostridia           | Clostridiales    | Ruminococcaceae                          | unclassified      |
| 13                       | 0  | 0  | 1   | 0   | Firmicutes                                                    | Clostridia           | Clostridiales    | unclassified                             | unclassified      |
| 5                        | 0  | 0  | 0   | 1   | Firmicutes                                                    | Bacilli              | Lactobacillales  | Aerococcaceae                            | unclassified      |
| 15                       | 3  | 0  | 0   | 37  | Firmicutes                                                    | Clostridia           | Clostridiales    | Clostridiales, Family XI, Incertae Sedis | Anaerococcus      |
| 17                       | 0  | 0  | 1   | 0   | Firmicutes                                                    | Clostridia           | Clostridiales    | Streptococcaceae                         | Streptococcus     |
| 18                       | 0  | 0  | 1   | 0   | Firmicutes                                                    | Clostridia           | Clostridiales    | Lachnospiraceae                          | unclassified      |
| 16                       | 0  | 0  | 0   | 1   | Firmicutes                                                    | Clostridia           | Clostridiales    | Clostridiaceae                           | Clostridium       |
| 14                       | 0  | 2  | 0   | 0   | Firmicutes                                                    | Clostridia           | Clostridiales    | Ruminococcaceae                          | Faecalibacterium  |
| 17                       | 0  | 1  | 0   | 0   | Firmicutes                                                    | Bacilli              | Bacillales       | Ruminococcaceae                          | Ureibacillus      |
| 12                       | 0  | 0  | 76  | 10  | Firmicutes                                                    | Bacilli              | Bacillales       | Paenibacillaceae                         | Paenibacillus     |
| 14                       | 4  | 5  | 11  | 12  | Firmicutes                                                    | Clostridia           | Clostridiales    | Clostridiales, Family XI, Incertae Sedis | Anaerococcus      |
| 16                       | 0  | 0  | 1   | 2   | Firmicutes                                                    | Bacilli              | Lactobacillales  | Aerococcaceae                            | unclassified      |
| 39                       | 0  | 2  | 0   | 0   | Firmicutes                                                    | Bacilli              | Bacillales       | Paenibacillaceae                         | Paenibacillus     |
| 40                       | 0  | 0  | 1   | 0   | Firmicutes                                                    | Clostridia           | Clostridiales    | Clostridiales, Family XI, Incertae Sedis | Anaerococcus      |

Table S5 (part G): OTUs, no. of reads and corresponding taxonomic affiliation of detected bacterial 16S rRNA amplicons by 454 pyrotag sequencing. Please note, the data shown here was either rank normalized or sum normalized (to 5000 reads per sample) before performing statistical analysis as depicted in the manuscript.

| Samples and no. of reads |     |    |     |       |            | taxonomic classification of bacterial 16S rRNA gene amplicons |                 |                                            |                    |  |              |
|--------------------------|-----|----|-----|-------|------------|---------------------------------------------------------------|-----------------|--------------------------------------------|--------------------|--|--------------|
| OTU                      | URL | CO | CNS | order | phylum     | class                                                         | order           | family                                     | genus              |  |              |
| 149                      | 3   | 20 | 13  | 2     | Firmicutes | Clostridia                                                    | Clostridiales   | Verruillaceae                              | Veillonella        |  | unclassified |
| 150                      | 2   | 1  | 0   | 3     | Firmicutes | Bacilli                                                       | Bacillales      | Planococcaceae                             | Solibacillus       |  | unclassified |
| 151                      | 3   | 3  | 15  | 1     | Firmicutes | Bacilli                                                       | Lactobacillales | Lactobacillaceae                           | Lactobacillus      |  | unclassified |
| 153                      | 0   | 0  | 2   | 0     | Firmicutes | Clostridia                                                    | Clostridiales   | Veillonellaceae                            | Veillonella        |  | unclassified |
| 156                      | 2   | 0  | 0   | 0     | Firmicutes | Clostridia                                                    | Clostridiales   | Desulfosporomus                            | Clostridium        |  | unclassified |
| 165                      | 2   | 6  | 0   | 4     | Firmicutes | Clostridia                                                    | Clostridiales   | Ruminococcaceae                            | Subdoligranulum    |  | unclassified |
| 167                      | 0   | 0  | 1   | 0     | Firmicutes | Bacilli                                                       | Bacillales      | Bacillaceae                                | Bacillus           |  | unclassified |
| 174                      | 0   | 0  | 2   | 0     | Firmicutes | Clostridia                                                    | Clostridiales   | unclassified                               | Peptoniphilus      |  | unclassified |
| 181                      | 6   | 1  | 23  | 12    | Firmicutes | Clostridia                                                    | Clostridiales   | Clostridiales, Family XI, Incertae Sedis   | Peptoniphilus      |  | unclassified |
| 198                      | 1   | 0  | 0   | 0     | Firmicutes | Clostridia                                                    | Clostridiales   | Clostridiales, Family XIII, Incertae Sedis | unclassified       |  | unclassified |
| 201                      | 0   | 0  | 1   | 0     | Firmicutes | Clostridia                                                    | Clostridiales   | Ruminococcaceae                            | unclassified       |  | unclassified |
| 202                      | 1   | 0  | 0   | 0     | Firmicutes | Bacilli                                                       | Bacillales      | Bacillaceae                                | Bacillus           |  | unclassified |
| 209                      | 0   | 3  | 3   | 9     | Firmicutes | Clostridia                                                    | Clostridiales   | Clostridiales, Family XI, Incertae Sedis   | unclassified       |  | unclassified |
| 210                      | 0   | 0  | 0   | 1     | Firmicutes | Clostridia                                                    | Clostridiales   | Lachnospiraceae                            | unclassified       |  | unclassified |
| 212                      | 0   | 0  | 0   | 1     | Firmicutes | Clostridia                                                    | Clostridiales   | Ruminococcaceae                            | Ruminococcus       |  | unclassified |
| 214                      | 0   | 2  | 0   | 0     | Firmicutes | Bacilli                                                       | Bacillales      | Bacillaceae                                | unclassified       |  | unclassified |
| 217                      | 2   | 3  | 11  | 91    | Firmicutes | Clostridia                                                    | Clostridiales   | Clostridiales, Family XI, Incertae Sedis   | Anaerococcus       |  | unclassified |
| 219                      | 0   | 1  | 0   | 0     | Firmicutes | Clostridia                                                    | Clostridiales   | Lachnospiraceae                            | unclassified       |  | unclassified |
| 223                      | 0   | 0  | 1   | 0     | Firmicutes | Clostridia                                                    | Clostridiales   | Ruminococcaceae                            | unclassified       |  | unclassified |
| 231                      | 0   | 1  | 0   | 0     | Firmicutes | Clostridia                                                    | Clostridiales   | Catabacteriaceae                           | unclassified       |  | unclassified |
| 240                      | 0   | 0  | 0   | 1     | Firmicutes | Clostridia                                                    | Clostridiales   | Ruminococcaceae                            | Chondrospira       |  | unclassified |
| 252                      | 1   | 0  | 8   | 4     | Firmicutes | Clostridia                                                    | Clostridiales   | Clostridiales, Family XI, Incertae Sedis   | Anaerococcus       |  | unclassified |
| 254                      | 0   | 1  | 1   | 1     | Firmicutes | Clostridia                                                    | Clostridiales   | unclassified                               | unclassified       |  | unclassified |
| 263                      | 1   | 1  | 0   | 0     | Firmicutes | Bacilli                                                       | Bacillales      | Planococcaceae                             | Ureibacillus       |  | unclassified |
| 263                      | 2   | 17 | 18  | 4     | Firmicutes | Bacilli                                                       | Lactobacillales | Streptococcaceae                           | Streptococcus      |  | unclassified |
| 266                      | 0   | 0  | 1   | 0     | Firmicutes | Clostridia                                                    | Clostridiales   | Lachnospiraceae                            | Clostridium        |  | unclassified |
| 267                      | 0   | 3  | 4   | 54    | Firmicutes | Bacilli                                                       | Lactobacillales | Aerococcaceae                              | unclassified       |  | unclassified |
| 270                      | 0   | 0  | 0   | 0     | Firmicutes | Bacilli                                                       | Bacillales      | Bacillaceae                                | Bacillus           |  | unclassified |
| 272                      | 0   | 0  | 3   | 0     | Firmicutes | Bacilli                                                       | Lactobacillales | Streptococcaceae                           | Streptococcus      |  | unclassified |
| 282                      | 0   | 0  | 2   | 0     | Firmicutes | Clostridia                                                    | Clostridiales   | unclassified                               | unclassified       |  | unclassified |
| 285                      | 0   | 1  | 0   | 0     | Firmicutes | Bacilli                                                       | Bacillales      | unclassified                               | unclassified       |  | unclassified |
| 287                      | 0   | 3  | 8   | 0     | Firmicutes | Bacilli                                                       | Bacillales      | Listeriaceae                               | Brochothrix        |  | unclassified |
| 288                      | 0   | 0  | 1   | 0     | Firmicutes | Bacilli                                                       | Bacillales      | unclassified                               | unclassified       |  | unclassified |
| 299                      | 0   | 17 | 0   | 0     | Firmicutes | Clostridia                                                    | Clostridiales   | Clostridiales, Family XI, Incertae Sedis   | Tissierella        |  | unclassified |
| 313                      | 0   | 1  | 1   | 0     | Firmicutes | Clostridia                                                    | Clostridiales   | Lachnospiraceae                            | unclassified       |  | unclassified |
| 333                      | 0   | 0  | 0   | 3     | Firmicutes | Clostridia                                                    | Clostridiales   | Lachnospiraceae                            | Eubacterium        |  | unclassified |
| 337                      | 0   | 0  | 0   | 1     | Firmicutes | Clostridia                                                    | Clostridiales   | Lachnospiraceae                            | Clostridium        |  | unclassified |
| 347                      | 0   | 4  | 0   | 0     | Firmicutes | Clostridia                                                    | Clostridiales   | Lachnospiraceae                            | unclassified       |  | unclassified |
| 348                      | 0   | 1  | 0   | 0     | Firmicutes | Clostridia                                                    | Clostridiales   | Lachnospiraceae                            | Bacteroides        |  | unclassified |
| 352                      | 0   | 0  | 0   | 2     | Firmicutes | Clostridia                                                    | Clostridiales   | Lachnospiraceae                            | Coprococcus        |  | unclassified |
| 353                      | 0   | 0  | 0   | 1     | Firmicutes | Clostridia                                                    | Clostridiales   | Lachnospiraceae                            | unclassified       |  | unclassified |
| 361                      | 0   | 0  | 1   | 0     | Firmicutes | Clostridia                                                    | Clostridiales   | Lachnospiraceae                            | unclassified       |  | unclassified |
| 378                      | 0   | 0  | 0   | 1     | Firmicutes | Clostridia                                                    | Clostridiales   | Lachnospiraceae                            | unclassified       |  | unclassified |
| 394                      | 0   | 0  | 0   | 1     | Firmicutes | unclassified                                                  | unclassified    | unclassified                               | unclassified       |  | unclassified |
| 399                      | 0   | 0  | 2   | 0     | Firmicutes | Bacilli                                                       | Lactobacillales | Streptococcaceae                           | Streptococcus      |  | unclassified |
| 401                      | 1   | 2  | 3   | 1     | Firmicutes | Bacilli                                                       | Lactobacillales | Leuconostocaceae                           | Leuconostoc        |  | unclassified |
| 405                      | 0   | 1  | 0   | 0     | Firmicutes | Clostridia                                                    | Clostridiales   | Lachnospiraceae                            | unclassified       |  | unclassified |
| 414                      | 1   | 1  | 1   | 0     | Firmicutes | Clostridia                                                    | Clostridiales   | Lachnospiraceae                            | Blautia            |  | unclassified |
| 427                      | 0   | 10 | 12  | 0     | Firmicutes | Clostridia                                                    | Clostridiales   | Clostridiales, Family XI, Incertae Sedis   | unclassified       |  | unclassified |
| 428                      | 3   | 1  | 0   | 0     | Firmicutes | Bacilli                                                       | Lactobacillales | Lactobacillaceae                           | Lactobacillus      |  | unclassified |
| 431                      | 0   | 1  | 2   | 0     | Firmicutes | Clostridia                                                    | Clostridiales   | Clostridiales, Family XIII, Incertae Sedis | unclassified       |  | unclassified |
| 456                      | 0   | 0  | 0   | 1     | Firmicutes | Bacilli                                                       | Bacillales      | Paenibacillaceae                           | Paenibacillus      |  | unclassified |
| 458                      | 0   | 0  | 0   | 1     | Firmicutes | Bacilli                                                       | Bacillales      | Paenibacillaceae                           | Paenibacillus      |  | unclassified |
| 459                      | 0   | 0  | 0   | 2     | Firmicutes | Clostridia                                                    | Clostridiales   | Clostridiales, Family XI, Incertae Sedis   | unclassified       |  | unclassified |
| 460                      | 1   | 0  | 0   | 0     | Firmicutes | Clostridia                                                    | Clostridiales   | Lachnospiraceae                            | Blautia            |  | unclassified |
| 466                      | 0   | 0  | 58  | 0     | Firmicutes | Clostridia                                                    | Clostridiales   | unclassified                               | unclassified       |  | unclassified |
| 471                      | 0   | 1  | 4   | 1     | Firmicutes | Bacilli                                                       | Bacillales      | Staphylococcaceae                          | Macrococcus        |  | unclassified |
| 476                      | 2   | 10 | 9   | 27    | Firmicutes | Clostridia                                                    | Clostridiales   | Ruminococcaceae                            | Ruminococcus       |  | unclassified |
| 482                      | 0   | 0  | 5   | 0     | Firmicutes | Bacilli                                                       | Bacillales      | Bacillaceae                                | Bacillus           |  | unclassified |
| 500                      | 0   | 0  | 0   | 2     | Firmicutes | Bacilli                                                       | Lactobacillales | Carnobacteriaceae                          | unclassified       |  | unclassified |
| 506                      | 3   | 0  | 0   | 0     | Firmicutes | Clostridia                                                    | Clostridiales   | Clostridiales                              | unclassified       |  | unclassified |
| 513                      | 1   | 0  | 0   | 0     | Firmicutes | Clostridia                                                    | Clostridiales   | Clostridiales, Family XI, Incertae Sedis   | unclassified       |  | unclassified |
| 515                      | 0   | 1  | 2   | 2     | Firmicutes | Bacilli                                                       | Lactobacillales | Leuconostocaceae                           | unclassified       |  | unclassified |
| 517                      | 0   | 0  | 2   | 0     | Firmicutes | Clostridia                                                    | Clostridiales   | Clostridiales                              | Clostridium        |  | unclassified |
| 521                      | 0   | 0  | 0   | 1     | Firmicutes | Clostridia                                                    | Clostridiales   | Veillonellaceae                            | Megaspheara        |  | unclassified |
| 547                      | 0   | 0  | 0   | 1     | Firmicutes | Clostridia                                                    | Clostridiales   | Lachnospiraceae                            | Clostridium        |  | unclassified |
| 553                      | 0   | 0  | 2   | 0     | Firmicutes | Clostridia                                                    | Clostridiales   | Lachnospiraceae                            | Catonella          |  | unclassified |
| 562                      | 0   | 0  | 0   | 1     | Firmicutes | Clostridia                                                    | Clostridiales   | Veillonellaceae                            | Dialister          |  | unclassified |
| 577                      | 25  | 9  | 49  | 125   | Firmicutes | Clostridia                                                    | Clostridiales   | Clostridiales, Family XI, Incertae Sedis   | Finegoldia         |  | unclassified |
| 578                      | 0   | 0  | 0   | 2     | 0          | Firmicutes                                                    | Clostridia      | Lachnospiraceae                            | unclassified       |  | unclassified |
| 592                      | 0   | 0  | 1   | 0     | Firmicutes | Bacilli                                                       | Bacillales      | Paenibacillaceae                           | Cohnella           |  | unclassified |
| 595                      | 4   | 1  | 25  | 32    | Firmicutes | Clostridia                                                    | Clostridiales   | Clostridiales, Family XI, Incertae Sedis   | Anaerococcus       |  | unclassified |
| 597                      | 1   | 3  | 0   | 1     | Firmicutes | Bacilli                                                       | Lactobacillales | Lactobacillaceae                           | Lactobacillus      |  | unclassified |
| 602                      | 0   | 2  | 0   | 0     | Firmicutes | Clostridia                                                    | Clostridiales   | unclassified                               | unclassified       |  | unclassified |
| 606                      | 0   | 1  | 0   | 0     | Firmicutes | Clostridia                                                    | Clostridiales   | Eubacteriaceae                             | unclassified       |  | unclassified |
| 608                      | 0   | 0  | 2   | 0     | Firmicutes | Bacilli                                                       | Lactobacillales | Carnobacteriaceae                          | unclassified       |  | unclassified |
| 610                      | 0   | 0  | 0   | 0     | Firmicutes | Clostridia                                                    | Clostridiales   | Lachnospiraceae                            | unclassified       |  | unclassified |
| 616                      | 0   | 0  | 0   | 1     | Firmicutes | Bacilli                                                       | Lactobacillales | Carnobacteriaceae                          | unclassified       |  | unclassified |
| 618                      | 0   | 10 | 0   | 0     | Firmicutes | Clostridia                                                    | Clostridiales   | Clostridiales, Family XI, Incertae Sedis   | unclassified       |  | unclassified |
| 621                      | 0   | 0  | 2   | 0     | Firmicutes | Bacilli                                                       | Lactobacillales | Lactobacillaceae                           | Lactobacillus      |  | unclassified |
| 640                      | 0   | 0  | 1   | 0     | Firmicutes | Clostridia                                                    | Clostridiales   | Veillonellaceae                            | unclassified       |  | unclassified |
| 643                      | 0   | 0  | 1   | 1     | Firmicutes | Clostridia                                                    | Clostridiales   | Lachnospiraceae                            | Coprococcus        |  | unclassified |
| 650                      | 0   | 1  | 0   | 0     | Firmicutes | Clostridia                                                    | Clostridiales   | Lachnospiraceae                            | unclassified       |  | unclassified |
| 657                      | 0   | 4  | 0   | 0     | Firmicutes | Bacilli                                                       | Lactobacillales | Lactobacillaceae                           | Lactobacillus      |  | unclassified |
| 658                      | 0   | 1  | 0   | 0     | Firmicutes | Clostridia                                                    | Clostridiales   | unclassified                               | unclassified       |  | unclassified |
| 659                      | 0   | 1  | 0   | 0     | Firmicutes | Bacilli                                                       | Bacillales      | Bacillaceae                                | Bacillus           |  | unclassified |
| 677                      | 0   | 4  | 0   | 0     | Firmicutes | Clostridia                                                    | Clostridiales   | Clostridiales, Family XI, Incertae Sedis   | Tissierella        |  | unclassified |
| 682                      | 0   | 0  | 2   | 0     | Firmicutes | Clostridia                                                    | Clostridiales   | unclassified                               | unclassified       |  | unclassified |
| 701                      | 0   | 0  | 0   | 1     | Firmicutes | Clostridia                                                    | Clostridiales   | Ruminococcaceae                            | Clostridium        |  | unclassified |
| 713                      | 0   | 0  | 2   | 0     | Firmicutes | Bacilli                                                       | Bacillales      | Paenibacillaceae                           | Paenibacillus      |  | unclassified |
| 715                      | 0   | 0  | 1   | 0     | Firmicutes | Bacilli                                                       | Bacillales      | Staphylococcaceae                          | Staphylococcus     |  | unclassified |
| 723                      | 0   | 1  | 0   | 0     | Firmicutes | Clostridia                                                    | Clostridiales   | Lachnospiraceae                            | unclassified       |  | unclassified |
| 743                      | 1   | 0  | 2   | 0     | Firmicutes | Clostridia                                                    | Clostridiales   | Peptostreptococcaceae                      | Peptostreptococcus |  | unclassified |
| 747                      | 0   | 0  | 0   | 1     | Firmicutes | Clostridia                                                    | Clostridiales   | Lachnospiraceae                            | unclassified       |  | unclassified |
| 750                      | 0   | 1  | 4   | 2     | Firmicutes | Bacilli                                                       | Lactobacillales | unclassified                               | unclassified       |  | unclassified |
| 752                      | 0   | 0  | 2   | 0     | Firmicutes | Clostridia                                                    | Clostridiales   | Clostridiales                              | Clostridium        |  | unclassified |
| 771                      | 0   | 3  | 0   | 0     | Firmicutes | Clostridia                                                    | Clostridiales   | Clostridiales, Family XI, Incertae Sedis   | Tissierella        |  | unclassified |
| 773                      | 0   | 1  | 0   | 0     | Firmicutes | Clostridia                                                    | Clostridiales   | Clostridiales                              | Clostridium        |  | unclassified |
| 788                      | 0   | 0  | 3   | 0     | Firmicutes | Clostridia                                                    | Clostridiales   | unclassified                               | unclassified       |  | unclassified |
| 797                      | 1   | 0  | 0   | 0     | Firmicutes | Bacilli                                                       | Bacillales      | Bacillaceae                                | unclassified       |  | unclassified |

Table S5 (part H): OTUs, no. of reads and corresponding taxonomic affiliation of detected bacterial 16S rRNA amplicons by 454 pyrotag sequencing. Please note, the data shown here was either rank normalized or sum normalized (to 5000 reads per sample) before performing statistical analysis as depicted in the manuscript.

| Samples and no. of reads |    |    |     |     | taxonomic classification of bacterial 16S rRNA gene amplicons |            |                   |                                          |                  |              |  |
|--------------------------|----|----|-----|-----|---------------------------------------------------------------|------------|-------------------|------------------------------------------|------------------|--------------|--|
| OTU                      | UR | CO | CNS | CRS | phylum                                                        | class      | order             | family                                   | genus            |              |  |
| 798                      | 1  | 0  | 0   | 0   | Firmicutes                                                    | Bacilli    | Bacillales        | Bacillaceae                              |                  | unclassified |  |
| 800                      | 0  | 6  | 10  | 7   | Firmicutes                                                    | Clostridia | Clostridiales     | Lachnospiraceae                          | Blautia          |              |  |
| 801                      | 0  | 0  | 0   | 3   | Firmicutes                                                    | Clostridia | Clostridiales     | Ruminococcaceae                          |                  | unclassified |  |
| 806                      | 0  | 0  | 0   | 1   | Firmicutes                                                    | Clostridia | Clostridiales     | Clostridiales, Family XI, Incertae Sedis |                  | unclassified |  |
| 810                      | 1  | 0  | 0   | 1   | Firmicutes                                                    | Clostridia | Clostridiales     | Ruminococcaceae                          | Ruminococcus     |              |  |
| 820                      | 0  | 0  | 0   | 1   | Firmicutes                                                    | Bacilli    | Bacillales        | Paenibacillaceae                         | Paenibacillus    |              |  |
| 824                      | 11 | 0  | 1   | 0   | Firmicutes                                                    | Bacilli    | Bacillales        | Planococcaceae                           | Rummeliibacillus |              |  |
| 830                      | 0  | 0  | 0   | 1   | Firmicutes                                                    | Clostridia | Clostridiales     | Veillonellaceae                          | Selenomonas      |              |  |
| 835                      | 0  | 1  | 0   | 0   | Firmicutes                                                    | Clostridia | Clostridiales     | Veillonellaceae                          | Selenomonas      |              |  |
| 864                      | 0  | 0  | 1   | 0   | Firmicutes                                                    | Bacilli    | Bacillales        | Bacillaceae                              | Bacillus         |              |  |
| 865                      | 0  | 0  | 3   | 0   | Firmicutes                                                    | Clostridia | Clostridiales     | Lachnospiraceae                          | Clostridium      |              |  |
| 868                      | 0  | 1  | 0   | 0   | Firmicutes                                                    | Clostridia | Clostridiales     | Clostridiales                            | Clostridium      |              |  |
| 875                      | 6  | 9  | 47  | 15  | Firmicutes                                                    | Bacilli    | Lactobacillales   | Lactobacillaceae                         | Lactobacillus    |              |  |
| 879                      | 0  | 1  | 0   | 0   | Firmicutes                                                    | Clostridia | Clostridiales     | Paenibacillaceae                         | Paenibacillus    |              |  |
| 886                      | 0  | 0  | 1   | 1   | Firmicutes                                                    | Clostridia | Clostridiales     | Ruminococcaceae                          |                  | unclassified |  |
| 887                      | 1  | 0  | 1   | 0   | Firmicutes                                                    | Bacilli    | Bacillales        | Paenibacillaceae                         | Paenibacillus    |              |  |
| 903                      | 5  | 7  | 0   | 3   | Firmicutes                                                    | Clostridia | Clostridiales     | Clostridiales                            | Clostridium      |              |  |
| 912                      | 0  | 0  | 1   | 0   | Firmicutes                                                    | Clostridia | Clostridiales     | Catabacteriaceae                         |                  | unclassified |  |
| 927                      | 0  | 1  | 0   | 0   | Firmicutes                                                    | Clostridia | Clostridiales     | Lachnospiraceae                          | Lachnospiraceae  |              |  |
| 928                      | 1  | 1  | 0   | 0   | Firmicutes                                                    | Clostridia | Clostridiales     | Clostridiales                            | Clostridium      |              |  |
| 946                      | 3  | 5  | 0   | 0   | Firmicutes                                                    | Bacilli    | Exiguobacteriales | Exiguobacteriaceae                       | Exiguobacterium  |              |  |
| 949                      | 1  | 0  | 6   | 1   | Firmicutes                                                    | Clostridia | Clostridiales     | Lachnospiraceae                          | Coprococcus      |              |  |
| 960                      | 0  | 1  | 0   | 0   | Firmicutes                                                    | Clostridia | Clostridiales     | Clostridiales, Family XI, Incertae Sedis | Parvimonas       |              |  |
| 964                      | 0  | 1  | 0   | 0   | Firmicutes                                                    | Clostridia | Clostridiales     | Lachnospiraceae                          | Coprococcus      |              |  |
| 971                      | 0  | 7  | 1   | 3   | Firmicutes                                                    | Clostridia | Clostridiales     | Ruminococcaceae                          |                  | unclassified |  |
| 980                      | 1  | 0  | 1   | 1   | Firmicutes                                                    | Clostridia | Clostridiales     | Lachnospiraceae                          | Blautia          |              |  |
| 993                      | 0  | 1  | 0   | 0   | Firmicutes                                                    | Clostridia | Clostridiales     | unclassified                             |                  | unclassified |  |
| 997                      | 0  | 0  | 0   | 1   | Firmicutes                                                    | Clostridia | Clostridiales     | Lachnospiraceae                          |                  | unclassified |  |
| 1001                     | 0  | 2  | 0   | 1   | Firmicutes                                                    | Clostridia | Clostridiales     | Lachnospiraceae                          |                  | unclassified |  |
| 1002                     | 0  | 0  | 1   | 0   | Firmicutes                                                    | Clostridia | Clostridiales     | Ruminococcaceae                          |                  | unclassified |  |
| 1003                     | 0  | 0  | 1   | 0   | Firmicutes                                                    | Bacilli    | Lactobacillales   | Streptococcaceae                         | Lactococcus      |              |  |
| 1020                     | 0  | 0  | 2   | 1   | Firmicutes                                                    | Clostridia | Clostridiales     | Clostridiales, Family XI, Incertae Sedis | Anaerococcus     |              |  |
| 1022                     | 2  | 4  | 14  | 7   | Firmicutes                                                    | Bacilli    | Bacillales        | Planococcaceae                           |                  | unclassified |  |
| 1024                     | 2  | 1  | 0   | 0   | Firmicutes                                                    | Clostridia | Clostridiales     | Lachnospiraceae                          | Clostridium      |              |  |
| 1029                     | 0  | 1  | 0   | 0   | Firmicutes                                                    | Clostridia | Clostridiales     | unclassified                             |                  | unclassified |  |
| 1039                     | 3  | 9  | 12  | 10  | Firmicutes                                                    | Bacilli    | Lactobacillales   | Streptococcaceae                         | Streptococcus    |              |  |
| 1049                     | 0  | 0  | 0   | 1   | Firmicutes                                                    | Bacilli    | Bacillales        | Bacillaceae                              | Bacillus         |              |  |
| 1053                     | 2  | 1  | 14  | 17  | Firmicutes                                                    | Bacilli    | Bacillales        | Paenibacillaceae                         | Paenibacillus    |              |  |
| 1054                     | 0  | 1  | 0   | 0   | Firmicutes                                                    | Clostridia | Clostridiales     | Lachnospiraceae                          |                  | unclassified |  |
| 1058                     | 0  | 0  | 0   | 1   | Firmicutes                                                    | Clostridia | Clostridiales     | Paenibacillaceae                         | Paenibacillus    |              |  |
| 1069                     | 0  | 0  | 1   | 1   | Firmicutes                                                    | Bacilli    | Lactobacillales   | Carnobacteriaceae                        | Carnobacterium   |              |  |
| 1072                     | 1  | 0  | 0   | 0   | Firmicutes                                                    | Bacilli    | Bacillales        | Paenibacillaceae                         | Paenibacillus    |              |  |
| 1074                     | 0  | 0  | 0   | 1   | Firmicutes                                                    | Clostridia | Clostridiales     | Lachnospiraceae                          |                  | unclassified |  |
| 1077                     | 0  | 1  | 0   | 0   | Firmicutes                                                    | Clostridia | Clostridiales     | Ruminococcaceae                          | Oscillospira     |              |  |
| 1085                     | 1  | 0  | 0   | 2   | Firmicutes                                                    | Clostridia | Clostridiales     | Veillonellaceae                          | Dialister        |              |  |
| 1098                     | 3  | 3  | 5   | 2   | Firmicutes                                                    | Bacilli    | Bacillales        | Staphylococcaceae                        |                  | unclassified |  |
| 1112                     | 9  | 0  | 0   | 0   | Firmicutes                                                    | Bacilli    | Lactobacillales   | Lactobacillaceae                         | Lactobacillus    |              |  |
| 1119                     | 0  | 2  | 0   | 0   | Firmicutes                                                    | Clostridia | Clostridiales     | Lachnospiraceae                          | Blautia          |              |  |
| 1118                     | 3  | 2  | 5   | 5   | Firmicutes                                                    | Clostridia | Clostridiales     | Lachnospiraceae                          | Roseburia        |              |  |
| 1119                     | 0  | 2  | 0   | 0   | Firmicutes                                                    | Clostridia | Clostridiales     | unclassified                             |                  | unclassified |  |
| 1120                     | 0  | 0  | 0   | 1   | Firmicutes                                                    | Clostridia | Clostridiales     | Lachnospiraceae                          |                  | unclassified |  |
| 1126                     | 0  | 0  | 2   | 0   | Firmicutes                                                    | Clostridia | Clostridiales     | Clostridiales                            | Clostridium      |              |  |
| 1128                     | 2  | 0  | 0   | 0   | Firmicutes                                                    | Clostridia | Clostridiales     | Ruminococcaceae                          |                  | unclassified |  |
| 1138                     | 0  | 0  | 2   | 0   | Firmicutes                                                    | Clostridia | Clostridiales     | Ruminococcaceae                          |                  | unclassified |  |
| 1139                     | 1  | 2  | 0   | 0   | Firmicutes                                                    | Bacilli    | Lactobacillales   | Carnobacteriaceae                        |                  | unclassified |  |
| 1149                     | 0  | 0  | 0   | 2   | Firmicutes                                                    | Clostridia | Clostridiales     | Lachnospiraceae                          |                  | unclassified |  |
| 1161                     | 0  | 1  | 1   | 0   | Firmicutes                                                    | Clostridia | Clostridiales     | Veillonellaceae                          | Selenomonas      |              |  |
| 1167                     | 0  | 1  | 0   | 0   | Firmicutes                                                    | Clostridia | unclassified      | unclassified                             |                  | unclassified |  |
| 1169                     | 6  | 18 | 7   | 10  | Firmicutes                                                    | Bacilli    | Lactobacillales   | Carnobacteriaceae                        | Carnobacterium   |              |  |
| 1178                     | 1  | 0  | 0   | 0   | Firmicutes                                                    | Clostridia | Clostridiales     | Ruminococcaceae                          | Ruminococcus     |              |  |
| 1183                     | 2  | 2  | 7   | 4   | Firmicutes                                                    | Clostridia | Clostridiales     | Clostridiales, Family XI, Incertae Sedis | Anaerococcus     |              |  |
| 1190                     | 0  | 0  | 0   | 2   | Firmicutes                                                    | Clostridia | Clostridiales     | Clostridiales, Family XI, Incertae Sedis | Peptoniphilus    |              |  |
| 1192                     | 0  | 0  | 0   | 0   | Firmicutes                                                    | Clostridia | Clostridiales     | Clostridiales, Family XI, Incertae Sedis | Peptoniphilus    |              |  |
| 1196                     | 0  | 0  | 0   | 1   | Firmicutes                                                    | Clostridia | Clostridiales     | Clostridiales                            | Clostridium      |              |  |
| 1216                     | 0  | 0  | 0   | 1   | Firmicutes                                                    | Clostridia | Clostridiales     | Clostridiales, Family XI, Incertae Sedis | Parvimonas       |              |  |
| 1221                     | 0  | 1  | 0   | 1   | Firmicutes                                                    | Clostridia | Clostridiales     | Lachnospiraceae                          |                  | unclassified |  |
| 1227                     | 0  | 0  | 1   | 0   | Firmicutes                                                    | Clostridia | 1807              | unclassified                             |                  | unclassified |  |
| 1239                     | 1  | 0  | 0   | 0   | Firmicutes                                                    | Clostridia | Clostridiales     | Veillonellaceae                          | Megasphaera      |              |  |
| 1242                     | 0  | 0  | 2   | 0   | Firmicutes                                                    | Clostridia | Clostridiales     | Lachnospiraceae                          |                  | unclassified |  |
| 1244                     | 1  | 0  | 0   | 0   | Firmicutes                                                    | Bacilli    | Bacillales        | Staphylococcaceae                        | Staphylococcus   |              |  |
| 1247                     | 0  | 4  | 0   | 3   | Firmicutes                                                    | Clostridia | Clostridiales     | Lachnospiraceae                          | Blautia          |              |  |
| 1265                     | 0  | 0  | 1   | 0   | Firmicutes                                                    | Clostridia | Clostridiales     | Lachnospiraceae                          |                  | unclassified |  |
| 1275                     | 0  | 0  | 0   | 1   | Firmicutes                                                    | Clostridia | Clostridiales     | Clostridiales, Family XI, Incertae Sedis | Peptoniphilus    |              |  |
| 1281                     | 2  | 2  | 0   | 0   | Firmicutes                                                    | Clostridia | Clostridiales     | Lachnospiraceae                          |                  | unclassified |  |
| 1289                     | 0  | 0  | 0   | 1   | Firmicutes                                                    | Clostridia | Clostridiales     | Lachnospiraceae                          |                  | unclassified |  |
| 1291                     | 0  | 1  | 0   | 0   | Firmicutes                                                    | Bacilli    | Bacillales        | Bacillaceae                              | Bacillus         |              |  |
| 1294                     | 0  | 0  | 0   | 0   | Firmicutes                                                    | Bacilli    | unclassified      | unclassified                             |                  | unclassified |  |
| 1299                     | 0  | 0  | 5   | 0   | Firmicutes                                                    | Clostridia | Clostridiales     | Veillonellaceae                          | Veillonella      |              |  |
| 1315                     | 0  | 0  | 1   | 0   | Firmicutes                                                    | Clostridia | Clostridiales     | Clostridiales, Family XI, Incertae Sedis | Anaerococcus     |              |  |
| 1318                     | 0  | 0  | 0   | 4   | Firmicutes                                                    | Clostridia | Clostridiales     | Ruminococcaceae                          |                  | unclassified |  |
| 1335                     | 0  | 0  | 1   | 0   | Firmicutes                                                    | Clostridia | Clostridiales     | Lachnospiraceae                          | Blautia          |              |  |
| 1336                     | 0  | 1  | 0   | 3   | Firmicutes                                                    | Clostridia | Clostridiales     | Lachnospiraceae                          |                  | unclassified |  |
| 1341                     | 0  | 0  | 0   | 1   | Firmicutes                                                    | Clostridia | Clostridiales     | Clostridiales                            | Clostridium      |              |  |
| 1342                     | 0  | 0  | 0   | 0   | Firmicutes                                                    | Bacilli    | Lactobacillales   | Turichobacteriaceae                      | Turichobacterium |              |  |
| 1357                     | 0  | 0  | 0   | 2   | Firmicutes                                                    | Clostridia | Clostridiales     | Clostridiales, Family XI, Incertae Sedis | Anaerococcus     |              |  |
| 1360                     | 0  | 0  | 1   | 0   | Firmicutes                                                    | Bacilli    | Bacillales        | Paenibacillaceae                         | Paenibacillus    |              |  |
| 1368                     | 0  | 0  | 1   | 0   | Firmicutes                                                    | Clostridia | Clostridiales     | Ruminococcaceae                          |                  | unclassified |  |
| 1371                     | 0  | 0  | 0   | 2   | Firmicutes                                                    | Bacilli    | Lactobacillales   | Aerococcaceae                            | Facklamia        |              |  |
| 1372                     | 1  | 0  | 2   | 3   | Firmicutes                                                    | Bacilli    | Lactobacillales   | Aerococcaceae                            | Aerococcus       |              |  |
| 1374                     | 0  | 1  | 2   | 0   | Firmicutes                                                    | Clostridia | Clostridiales     | Lachnospiraceae                          | Coprococcus      |              |  |
| 1375                     | 0  | 0  | 0   | 5   | Firmicutes                                                    | Clostridia | Clostridiales     | Veillonellaceae                          | Anaerodubius     |              |  |
| 1379                     | 3  | 0  | 0   | 18  | 46                                                            | Firmicutes | Clostridia        | Clostridiales, Family XI, Incertae Sedis | Anaerococcus     |              |  |
| 1381                     | 0  | 0  | 1   | 0   | Firmicutes                                                    | Bacilli    | Lactobacillales   | Streptococcaceae                         | Streptococcus    |              |  |
| 1384                     | 0  | 0  | 2   | 0   | Firmicutes                                                    | Bacilli    | Bacillales        | Bacillaceae                              | Bacillus         |              |  |
| 1391                     | 0  | 0  | 4   | 0   | Firmicutes                                                    | Clostridia | Clostridiales     | Clostridiales                            | Clostridium      |              |  |
| 1392                     | 2  | 1  | 13  | 8   | Firmicutes                                                    | Clostridia | Clostridiales     | Clostridiales, Family XI, Incertae Sedis | Anaerococcus     |              |  |
| 1402                     | 0  | 3  | 3   | 6   | Firmicutes                                                    | Bacilli    | Bacillales        | Bacillaceae                              | Bacillus         |              |  |
| 1405                     | 0  | 0  | 0   | 1   | Firmicutes                                                    | Clostridia | Clostridiales     | Lachnospiraceae                          |                  | unclassified |  |
| 1406                     | 0  | 6  | 0   | 0   | Firmicutes                                                    | Bacilli    | Lactobacillales   | Enterococcaceae                          |                  | unclassified |  |
| 1407                     | 0  | 0  | 0   | 1   | Firmicutes                                                    | Clostridia | Clostridiales     | Veillonellaceae                          |                  | unclassified |  |

Table S5 (part I): OTUs, no. of reads and corresponding taxonomic affiliation of detected bacterial 16S rRNA amplicons by 454 pyrotag sequencing. Please note, the data shown here were either rank normalized or sum normalized (to 5000 reads per sample) before performing statistical analysis as depicted in the manuscript.

| Samples and no. of reads |     |    |     | taxonomic classification of bacterial 16S rRNA gene amplicons |                  |                  |                  |                                            |                  |
|--------------------------|-----|----|-----|---------------------------------------------------------------|------------------|------------------|------------------|--------------------------------------------|------------------|
| OTU                      | URI | CO | CRS | phylum                                                        | class            | order            | family           | genus                                      |                  |
| 1411                     | 0   | 0  | 0   | 3                                                             | Firmicutes       | Clostridia       | Clostridiales    | Lachnospiraceae                            | Coproccoccus     |
| 1418                     | 0   | 0  | 0   | 1                                                             | Firmicutes       | Clostridia       | Clostridiales    | Clostridiales                              | unclassified     |
| 1421                     | 4   | 9  | 4   | 5                                                             | Firmicutes       | Bacilli          | Lactobacillales  | Enterococcaceae                            | Enterococcus     |
| 1422                     | 0   | 1  | 0   | 0                                                             | Firmicutes       | Clostridia       | Clostridiales    | unclassified                               | unclassified     |
| 1435                     | 0   | 2  | 0   | 0                                                             | Firmicutes       | Clostridia       | Clostridiales    | Ruminococcaceae                            | unclassified     |
| 1437                     | 0   | 1  | 1   | 7                                                             | Firmicutes       | Clostridia       | Clostridiales    | Lachnospiraceae                            | Ruminococcus     |
| 1438                     | 3   | 0  | 0   | 4                                                             | Firmicutes       | Clostridia       | Clostridiales    | Clostridiales                              | Clostridium      |
| 1440                     | 0   | 4  | 3   | 1                                                             | Firmicutes       | Bacilli          | Bacillales       | Altycyobacillaceae                         | Altycyobacillus  |
| 1441                     | 0   | 1  | 0   | 0                                                             | Firmicutes       | Bacilli          | Bacillales       | Planococcaceae                             | Bacillus         |
| 1442                     | 2   | 40 | 11  | 10                                                            | Firmicutes       | Bacilli          | Lactobacillales  | Streptococcaceae                           | Lactococcus      |
| 1451                     | 0   | 0  | 0   | 2                                                             | Firmicutes       | Clostridia       | Clostridiales    | Lachnospiraceae                            | unclassified     |
| 1485                     | 0   | 0  | 0   | 1                                                             | Firmicutes       | Clostridia       | Clostridiales    | Clostridiales                              | Clostridium      |
| 1488                     | 0   | 0  | 1   | 0                                                             | Firmicutes       | Bacilli          | Carnobacteriales | Gracilobacteriaceae                        | Gracilobacter    |
| 1491                     | 2   | 0  | 7   | 3                                                             | Firmicutes       | Clostridia       | Clostridiales    | Clostridiales, Family XI, Incertae Sedis   | Peptoniphilus    |
| 1518                     | 0   | 2  | 0   | 0                                                             | Firmicutes       | Clostridia       | Clostridiales    | Ruminococcaceae                            | unclassified     |
| 1526                     | 0   | 0  | 1   | 0                                                             | Firmicutes       | Clostridia       | Clostridiales    | OPB54                                      | unclassified     |
| 1555                     | 0   | 0  | 1   | 4                                                             | Firmicutes       | Clostridia       | Clostridiales    | Clostridiales, Family XI, Incertae Sedis   | Anaerococcus     |
| 1556                     | 5   | 0  | 0   | 0                                                             | Firmicutes       | Bacilli          | Lactobacillales  | Lactobacillaceae                           | Lactobacillus    |
| 1558                     | 0   | 0  | 3   | 0                                                             | Firmicutes       | Clostridia       | Clostridiales    | Lachnospiraceae                            | unclassified     |
| 1562                     | 0   | 20 | 3   | 1                                                             | Firmicutes       | Clostridia       | Clostridiales    | Clostridiales                              | unclassified     |
| 1575                     | 0   | 3  | 0   | 0                                                             | Firmicutes       | Clostridia       | Clostridiales    | Lachnospiraceae                            | Ruminococcus     |
| 1579                     | 0   | 0  | 0   | 1                                                             | Firmicutes       | Clostridia       | Clostridiales    | Ruminococcaceae                            | Eubacterium      |
| 1581                     | 0   | 0  | 0   | 1                                                             | Firmicutes       | Clostridia       | Clostridiales    | Clostridiales, Family XI, Incertae Sedis   | Peptoniphilus    |
| 1584                     | 13  | 6  | 0   | 2                                                             | Firmicutes       | Bacilli          | Bacillales       | Bacillaceae                                | Bacillus         |
| 1587                     | 1   | 0  | 0   | 0                                                             | Firmicutes       | Clostridia       | Clostridiales    | Clostridiales, Family XIII, Incertae Sedis | unclassified     |
| 1590                     | 1   | 14 | 11  | 12                                                            | Firmicutes       | Clostridia       | Clostridiales    | Ruminococcaceae                            | Faecalibacterium |
| 1591                     | 0   | 0  | 2   | 0                                                             | Firmicutes       | unclassified     | unclassified     | unclassified                               | unclassified     |
| 1614                     | 0   | 2  | 0   | 0                                                             | Firmicutes       | unclassified     | unclassified     | unclassified                               | unclassified     |
| 1617                     | 0   | 0  | 5   | 2                                                             | Firmicutes       | Clostridia       | Clostridiales    | Veillonellaceae                            | Veillonella      |
| 1629                     | 0   | 1  | 0   | 0                                                             | Firmicutes       | Clostridia       | Clostridiales    | Eubacteriaceae                             | unclassified     |
| 1642                     | 0   | 2  | 0   | 2                                                             | Firmicutes       | Bacilli          | Lactobacillales  | Carnobacteriaceae                          | Desemisia        |
| 1645                     | 0   | 0  | 0   | 1                                                             | Firmicutes       | Clostridia       | Clostridiales    | Clostridiales                              | Clostridium      |
| 1650                     | 0   | 10 | 7   | 3                                                             | Firmicutes       | Clostridia       | Clostridiales    | Clostridiales                              | Clostridium      |
| 1651                     | 0   | 1  | 0   | 0                                                             | Firmicutes       | Clostridia       | Clostridiales    | Lachnospiraceae                            | unclassified     |
| 1652                     | 1   | 0  | 0   | 0                                                             | Firmicutes       | Clostridia       | Clostridiales    | MBA08                                      | unclassified     |
| 1657                     | 0   | 1  | 0   | 0                                                             | Firmicutes       | Clostridia       | Clostridiales    | Lachnospiraceae                            | Coproccoccus     |
| 1664                     | 0   | 0  | 0   | 1                                                             | Firmicutes       | unclassified     | unclassified     | unclassified                               | unclassified     |
| 1665                     | 0   | 0  | 1   | 0                                                             | Firmicutes       | Clostridia       | Clostridiales    | Clostridiales, Family XI, Incertae Sedis   | Helcococcus      |
| 1688                     | 0   | 0  | 1   | 0                                                             | Firmicutes       | Clostridia       | Clostridiales    | Clostridiales                              | Sarcina          |
| 1693                     | 0   | 0  | 0   | 1                                                             | Firmicutes       | Bacilli          | Lactobacillales  | Streptococcaceae                           | Streptococcus    |
| 1694                     | 0   | 0  | 2   | 0                                                             | Firmicutes       | Bacilli          | Aerococcaceae    | Aerococcus                                 | unclassified     |
| 1697                     | 1   | 1  | 0   | 3                                                             | Firmicutes       | Clostridia       | Clostridiales    | Veillonellaceae                            | Dialister        |
| 1704                     | 0   | 2  | 1   | 3                                                             | Firmicutes       | Clostridia       | Clostridiales    | Lachnospiraceae                            | Coproccoccus     |
| 1707                     | 20  | 2  | 1   | 0                                                             | Firmicutes       | Bacilli          | Lactobacillales  | Lactobacillaceae                           | Lactobacillus    |
| 1709                     | 0   | 1  | 0   | 0                                                             | Firmicutes       | Clostridia       | Clostridiales    | Lachnospiraceae                            | unclassified     |
| 1722                     | 0   | 1  | 0   | 0                                                             | Firmicutes       | Clostridia       | Clostridiales    | Clostridiales, Family XIII, Incertae Sedis | Eubacterium      |
| 611                      | 1   | 0  | 0   | 0                                                             | Fusobacteria     | Fusobacteria     | Fusobacteriales  | Fusobacteriaceae                           | Fusobacterium    |
| 1207                     | 0   | 0  | 0   | 0                                                             | Fusobacteria     | Fusobacteriales  | Fusobacteriales  | Fusobacteriales                            | unclassified     |
| 222                      | 0   | 1  | 0   | 0                                                             | Gemmatimonadetes | Gemmatimonadetes | Gemmatimonadales | Gemmatimonadaceae                          | unclassified     |
| 329                      | 0   | 1  | 0   | 0                                                             | Gemmatimonadetes | Gemmatimonadetes | Gemmatimonadales | Gemmatimonadaceae                          | unclassified     |
| 355                      | 0   | 1  | 0   | 0                                                             | Gemmatimonadetes | Gemmatimonadetes | Gemmatimonadales | Gemmatimonadaceae                          | unclassified     |
| 372                      | 0   | 1  | 0   | 0                                                             | Gemmatimonadetes | Gemmatimonadetes | Gemmatimonadales | Gemmatimonadaceae                          | unclassified     |
| 421                      | 0   | 0  | 1   | 0                                                             | Gemmatimonadetes | Gemmatimonadetes | Gemmatimonadales | Gemmatimonadaceae                          | unclassified     |
| 579                      | 0   | 1  | 0   | 1                                                             | Gemmatimonadetes | Gemmatimonadetes | unclassified     | unclassified                               | unclassified     |
| 619                      | 0   | 0  | 0   | 0                                                             | Gemmatimonadetes | Gemmatimonadetes | Gemmatimonadales | Gemmatimonadaceae                          | unclassified     |
| 712                      | 0   | 0  | 1   | 0                                                             | Gemmatimonadetes | Gemmatimonadetes | Gemmatimonadales | Gemmatimonadaceae                          | unclassified     |
| 769                      | 1   | 0  | 0   | 0                                                             | Gemmatimonadetes | Gemmatimonadetes | Gemmatimonadales | Gemmatimonadaceae                          | unclassified     |
| 834                      | 0   | 1  | 0   | 0                                                             | Gemmatimonadetes | Gemmatimonadetes | Gemmatimonadales | Gemmatimonadaceae                          | unclassified     |
| 841                      | 0   | 3  | 0   | 0                                                             | Gemmatimonadetes | Gemmatimonadetes | Gemmatimonadales | Gemmatimonadaceae                          | unclassified     |
| 867                      | 2   | 0  | 0   | 0                                                             | Gemmatimonadetes | Gemmatimonadetes | Gemmatimonadales | Gemmatimonadaceae                          | Gemmatimonas     |
| 896                      | 0   | 6  | 0   | 0                                                             | Gemmatimonadetes | Gemmatimonadetes | Gemmatimonadales | Gemmatimonadaceae                          | unclassified     |
| 972                      | 0   | 0  | 1   | 0                                                             | Gemmatimonadetes | Gemmatimonadetes | Gemmatimonadales | Gemmatimonadaceae                          | unclassified     |
| 1008                     | 0   | 0  | 1   | 0                                                             | Gemmatimonadetes | Gemmatimonadetes | unclassified     | unclassified                               | unclassified     |
| 1013                     | 0   | 1  | 0   | 0                                                             | Gemmatimonadetes | Gemmatimonadetes | Gemmatimonadales | Gemmatimonadaceae                          | unclassified     |
| 1026                     | 0   | 4  | 0   | 0                                                             | Gemmatimonadetes | Gemmatimonadetes | unclassified     | unclassified                               | unclassified     |
| 1038                     | 0   | 1  | 0   | 0                                                             | Gemmatimonadetes | Gemmatimonadetes | Gemmatimonadales | Gemmatimonadaceae                          | unclassified     |
| 1051                     | 0   | 3  | 0   | 0                                                             | Gemmatimonadetes | Gemmatimonadetes | Gemmatimonadales | Gemmatimonadaceae                          | unclassified     |
| 1203                     | 0   | 1  | 0   | 0                                                             | Gemmatimonadetes | Gemmatimonadetes | Gemmatimonadales | Gemmatimonadaceae                          | unclassified     |
| 1211                     | 0   | 0  | 3   | 0                                                             | Gemmatimonadetes | Gemmatimonadetes | Gemmatimonadales | Gemmatimonadaceae                          | unclassified     |
| 1227                     | 0   | 4  | 0   | 1                                                             | Gemmatimonadetes | Gemmatimonadetes | Gemmatimonadales | Gemmatimonadaceae                          | unclassified     |
| 1246                     | 0   | 1  | 0   | 0                                                             | Gemmatimonadetes | Gemmatimonadetes | Gemmatimonadales | Gemmatimonadaceae                          | unclassified     |
| 1255                     | 0   | 5  | 3   | 0                                                             | Gemmatimonadetes | Gemmatimonadetes | Gemmatimonadales | Gemmatimonadaceae                          | unclassified     |
| 1259                     | 0   | 3  | 0   | 2                                                             | Gemmatimonadetes | Gemmatimonadetes | Gemmatimonadales | Gemmatimonadaceae                          | unclassified     |
| 1355                     | 0   | 0  | 0   | 1                                                             | Gemmatimonadetes | Gemmatimonadetes | Gemmatimonadales | Gemmatimonadaceae                          | unclassified     |
| 1454                     | 0   | 0  | 0   | 1                                                             | Gemmatimonadetes | Gemmatimonadetes | unclassified     | unclassified                               | unclassified     |
| 1516                     | 0   | 0  | 1   | 0                                                             | Gemmatimonadetes | Gemmatimonadetes | Gemmatimonadales | Gemmatimonadaceae                          | unclassified     |
| 134                      | 0   | 0  | 0   | 1                                                             | Nitrospirae      | Nitrospirae      | Nitrospirales    | Nitrospiraceae                             | Nitrospira       |
| 286                      | 0   | 0  | 1   | 1                                                             | Nitrospirae      | Nitrospirae      | Nitrospirales    | Nitrospiraceae                             | Nitrospira       |
| 947                      | 1   | 0  | 0   | 0                                                             | Nitrospirae      | Nitrospirae      | Nitrospirales    | Nitrospiraceae                             | Nitrospira       |
| 9                        | 0   | 0  | 1   | 0                                                             | Planctomycetes   | Planctomycetes   | Gemmatales       | Isosphaeraceae                             | unclassified     |
| 23                       | 0   | 2  | 0   | 0                                                             | Planctomycetes   | Planctomycetes   | Planctomycetales | Planctomycetaceae                          | unclassified     |
| 70                       | 1   | 0  | 0   | 0                                                             | Planctomycetes   | Planctomycetes   | Gemmatales       | Gemmataceae                                | unclassified     |
| 158                      | 0   | 0  | 1   | 0                                                             | Planctomycetes   | Planctomycetes   | Planctomycetales | Planctomycetaceae                          | unclassified     |
| 300                      | 0   | 0  | 1   | 0                                                             | Planctomycetes   | Planctomycetes   | Gemmatales       | Gemmataceae                                | Gemmata          |
| 311                      | 0   | 1  | 0   | 0                                                             | Planctomycetes   | Planctomycetes   | Gemmatales       | Gemmataceae                                | unclassified     |
| 362                      | 0   | 0  | 0   | 1                                                             | Planctomycetes   | Planctomycetes   | Planctomycetales | Planctomycetaceae                          | A17              |
| 413                      | 0   | 0  | 2   | 0                                                             | Planctomycetes   | Planctomycetes   | Gemmatales       | Isosphaeraceae                             | unclassified     |
| 415                      | 0   | 0  | 1   | 0                                                             | Planctomycetes   | Planctomycetes   | Planctomycetales | Planctomycetaceae                          | unclassified     |
| 422                      | 0   | 7  | 0   | 0                                                             | Planctomycetes   | Planctomycetes   | Planctomycetales | Rhodopirellaceae                           | Rhodopirella     |
| 509                      | 0   | 0  | 1   | 0                                                             | Planctomycetes   | Planctomycetes   | Planctomycetales | Planctomycetaceae                          | unclassified     |
| 571                      | 0   | 0  | 0   | 1                                                             | Planctomycetes   | Planctomycetes   | Planctomycetales | Planctomycetaceae                          | Planctomycetes   |
| 598                      | 0   | 0  | 0   | 1                                                             | Planctomycetes   | Planctomycetes   | Gemmatales       | Gemmataceae                                | Gemmata          |
| 700                      | 0   | 1  | 0   | 0                                                             | Planctomycetes   | Planctomycetes   | Gemmatales       | Gemmataceae                                | unclassified     |
| 717                      | 0   | 0  | 1   | 0                                                             | Planctomycetes   | Planctomycetes   | Gemmatales       | Gemmataceae                                | unclassified     |
| 724                      | 0   | 10 | 0   | 0                                                             | Planctomycetes   | Planctomycetes   | Planctomycetales | Planctomycetaceae                          | Rhodopirella     |
| 728                      | 0   | 1  | 0   | 0                                                             | Planctomycetes   | Planctomycetes   | Gemmatales       | Gemmataceae                                | Gemmata          |
| 729                      | 0   | 0  | 1   | 0                                                             | Planctomycetes   | Planctomycetes   | Planctomycetales | Planctomycetaceae                          | unclassified     |
| 748                      | 0   | 0  | 0   | 1                                                             | Planctomycetes   | Planctomycetes   | Gemmatales       | Isosphaeraceae                             | unclassified     |
| 803                      | 0   | 3  | 0   | 0                                                             | Planctomycetes   | Planctomycetes   | Planctomycetales | Planctomycetaceae                          | unclassified     |
| 814                      | 0   | 0  | 0   | 2                                                             | Planctomycetes   | Planctomycetes   | Planctomycetales | Planctomycetaceae                          | Planctomycetes   |

Table S5 (part II): OTUs, no. of reads and corresponding taxonomic affiliation of detected bacterial 16S rRNA amplicons by 454 pyrotag sequencing. Please note, the data shown here were either rank normalized or sum normalized (to 5000 reads per sample) before performing statistical analysis as depicted in the manuscript.

| Samples and no. of reads |     |     |     | taxonomic classification of bacterial 16S rRNA gene amplicons |                     |                       |                       |                         |  |
|--------------------------|-----|-----|-----|---------------------------------------------------------------|---------------------|-----------------------|-----------------------|-------------------------|--|
| URI                      | CO  | CR8 | CR5 | phylum                                                        | class               | order                 | family                | genus                   |  |
| 0                        | 0   | 2   | 0   | Planctomycetes                                                | Planctomycetes      | Gemmatales            | Gemmataceae           | Gemmata                 |  |
| 0                        | 5   | 0   | 2   | Planctomycetes                                                | Planctomycetes      | Gemmatales            | Isosphaeraceae        | unclassified            |  |
| 0                        | 0   | 1   | 0   | Planctomycetes                                                | Planctomycetes      | Gemmatales            | Gemmataceae           | unclassified            |  |
| 0                        | 2   | 0   | 0   | Planctomycetes                                                | Planctomycetes      | Gemmatales            | unclassified          | unclassified            |  |
| 0                        | 1   | 0   | 0   | Planctomycetes                                                | Planctomycetes      | Planctomycetales      | Planctomycetaceae     | unclassified            |  |
| 0                        | 0   | 2   | 0   | Planctomycetes                                                | Planctomycetes      | Gemmatales            | Gemmataceae           | Gemmata                 |  |
| 0                        | 0   | 1   | 0   | Planctomycetes                                                | Planctomycetes      | Gemmatales            | Gemmataceae           | unclassified            |  |
| 0                        | 1   | 1   | 0   | Planctomycetes                                                | Planctomycetes      | Gemmatales            | Gemmataceae           | Gemmata                 |  |
| 0                        | 1   | 0   | 0   | Planctomycetes                                                | Planctomycetes      | Gemmatales            | Gemmataceae           | Gemmata                 |  |
| 0                        | 1   | 0   | 2   | Planctomycetes                                                | Planctomycetes      | Gemmatales            | Isosphaeraceae        | unclassified            |  |
| 0                        | 1   | 0   | 0   | Planctomycetes                                                | Planctomycetes      | Planctomycetales      | Planctomycetaceae     | unclassified            |  |
| 0                        | 0   | 2   | 0   | Planctomycetes                                                | Planctomycetes      | Planctomycetales      | Planctomycetaceae     | Planctomycetes          |  |
| 0                        | 0   | 1   | 0   | Planctomycetes                                                | Planctomycetes      | Gemmatales            | Isosphaeraceae        | unclassified            |  |
| 0                        | 0   | 1   | 0   | Planctomycetes                                                | Planctomycetes      | Planctomycetales      | Planctomycetaceae     | unclassified            |  |
| 0                        | 1   | 0   | 1   | Planctomycetes                                                | Planctomycetes      | Gemmatales            | Gemmataceae           | Gemmata                 |  |
| 0                        | 0   | 1   | 1   | Planctomycetes                                                | Planctomycetes      | Gemmatales            | Gemmataceae           | Gemmata                 |  |
| 0                        | 0   | 1   | 0   | Planctomycetes                                                | Planctomycetes      | Planctomycetales      | Planctomycetaceae     | Rhodopirella            |  |
| 0                        | 0   | 5   | 0   | Planctomycetes                                                | Planctomycetes      | Planctomycetales      | Planctomycetaceae     | Planctomycetes          |  |
| 0                        | 1   | 0   | 0   | Planctomycetes                                                | Planctomycetes      | Gemmatales            | Gemmataceae           | Gemmata                 |  |
| 0                        | 0   | 2   | 0   | Planctomycetes                                                | Planctomycetes      | Gemmatales            | Isosphaeraceae        | unclassified            |  |
| 0                        | 0   | 0   | 1   | Planctomycetes                                                | Planctomycetes      | Gemmatales            | Isosphaeraceae        | unclassified            |  |
| 0                        | 0   | 0   | 1   | Planctomycetes                                                | Planctomycetes      | Gemmatales            | Isosphaeraceae        | unclassified            |  |
| 0                        | 0   | 0   | 1   | Proteobacteria                                                | Alphaproteobacteria | unclassified          | unclassified          | unclassified            |  |
| 0                        | 0   | 0   | 0   | Proteobacteria                                                | Betaproteobacteria  | unclassified          | unclassified          | unclassified            |  |
| 4                        | 2   | 0   | 0   | Proteobacteria                                                | Alphaproteobacteria | Sphingomonadales      | Erythrobacteraceae    | Lutibacterium           |  |
| 0                        | 0   | 0   | 1   | Proteobacteria                                                | Alphaproteobacteria | Rhizobiales           | Aurantimonadaceae     | unclassified            |  |
| 0                        | 1   | 0   | 0   | Proteobacteria                                                | Alphaproteobacteria | Rhizobiales           | Phyllobacteriaceae    | unclassified            |  |
| 0                        | 8   | 2   | 8   | Proteobacteria                                                | Alphaproteobacteria | Rhodobacteriales      | Rhodobacteraceae      | Rubellimicrobium        |  |
| 0                        | 3   | 1   | 0   | Proteobacteria                                                | Alphaproteobacteria | Sphingomonadales      | Sphingomonadaceae     | unclassified            |  |
| 0                        | 0   | 1   | 0   | Proteobacteria                                                | Alphaproteobacteria | Rhodospirillales      | Rhodospirillaceae     | unclassified            |  |
| 1                        | 2   | 0   | 1   | Proteobacteria                                                | Alphaproteobacteria | Sphingomonadales      | Sphingomonadaceae     | unclassified            |  |
| 1                        | 0   | 0   | 0   | Proteobacteria                                                | Alphaproteobacteria | unclassified          | unclassified          | unclassified            |  |
| 0                        | 0   | 0   | 0   | Proteobacteria                                                | Alphaproteobacteria | Sphingomonadales      | Sphingomonadaceae     | unclassified            |  |
| 0                        | 0   | 1   | 0   | Proteobacteria                                                | Alphaproteobacteria | Rhizobiales           | unclassified          | unclassified            |  |
| 0                        | 0   | 1   | 0   | Proteobacteria                                                | Betaproteobacteria  | unclassified          | unclassified          | unclassified            |  |
| 0                        | 0   | 2   | 0   | Proteobacteria                                                | Alphaproteobacteria | Rhizobiales           | unclassified          | unclassified            |  |
| 0                        | 0   | 0   | 1   | Proteobacteria                                                | Alphaproteobacteria | Rhodobacteriales      | Rhodobacteraceae      | Rubellimicrobium        |  |
| 0                        | 4   | 0   | 0   | Proteobacteria                                                | Alphaproteobacteria | Rhodobacteriales      | Rhodobacteraceae      | unclassified            |  |
| 1                        | 1   | 0   | 0   | Proteobacteria                                                | Alphaproteobacteria | Rhodospirillales      | Acetobacteraceae      | Roseomonas              |  |
| 0                        | 0   | 0   | 0   | Proteobacteria                                                | Alphaproteobacteria | Rhizobiales           | Methylobacteriaceae   | Methylobacterium        |  |
| 0                        | 0   | 0   | 2   | Proteobacteria                                                | Alphaproteobacteria | Rhodobacteriales      | Rhodobacteraceae      | Amaricoccus             |  |
| 0                        | 1   | 0   | 0   | Proteobacteria                                                | Betaproteobacteria  | Synergistobacteriales | Synergistobacteraceae | unclassified            |  |
| 0                        | 0   | 1   | 0   | Proteobacteria                                                | Alphaproteobacteria | Rhodospirillales      | Acetobacteraceae      | unclassified            |  |
| 0                        | 0   | 3   | 0   | Proteobacteria                                                | Alphaproteobacteria | Rhizobiales           | Bradyrhizobiaceae     | unclassified            |  |
| 0                        | 1   | 0   | 0   | Proteobacteria                                                | unclassified        | unclassified          | unclassified          | unclassified            |  |
| 0                        | 0   | 0   | 1   | Proteobacteria                                                | Alphaproteobacteria | Sphingomonadales      | Sphingomonadaceae     | unclassified            |  |
| 0                        | 0   | 0   | 0   | Proteobacteria                                                | Alphaproteobacteria | Rhodospirillales      | Acetobacteraceae      | unclassified            |  |
| 0                        | 1   | 0   | 0   | Proteobacteria                                                | Alphaproteobacteria | Brucellales           | unclassified          | Pseudocylindrobacterium |  |
| 0                        | 1   | 0   | 0   | Proteobacteria                                                | Gammaproteobacteria | Oceanospirillales     | HTCC2188              | unclassified            |  |
| 1                        | 3   | 1   | 2   | Proteobacteria                                                | Alphaproteobacteria | Rhodobacteriales      | Rhodobacteraceae      | Rubellimicrobium        |  |
| 0                        | 1   | 0   | 0   | Proteobacteria                                                | Alphaproteobacteria | Rhodospirillales      | Acetobacteraceae      | unclassified            |  |
| 0                        | 1   | 0   | 0   | Proteobacteria                                                | Alphaproteobacteria | Caulobacteriales      | Caulobacteraceae      | unclassified            |  |
| 0                        | 0   | 1   | 0   | Proteobacteria                                                | Alphaproteobacteria | Rhizobiales           | Phyllobacteriaceae    | Aminobacter             |  |
| 0                        | 0   | 0   | 1   | Proteobacteria                                                | Alphaproteobacteria | Sphingomonadales      | Erythrobacteraceae    | unclassified            |  |
| 0                        | 0   | 0   | 1   | Proteobacteria                                                | Betaproteobacteria  | Burkholderiales       | Comamonadaceae        | Gammamonas              |  |
| 11                       | 0   | 6   | 8   | Proteobacteria                                                | Gammaproteobacteria | Pseudomonadales       | Pseudomonadaceae      | Pseudomonas             |  |
| 1                        | 0   | 0   | 0   | Proteobacteria                                                | Alphaproteobacteria | Rhodobacteriales      | Rhodobacteraceae      | Amaricoccus             |  |
| 0                        | 0   | 1   | 0   | Proteobacteria                                                | Alphaproteobacteria | Rhodospirillales      | Rhodospirillaceae     | unclassified            |  |
| 0                        | 1   | 0   | 0   | Proteobacteria                                                | Alphaproteobacteria | Caulobacteriales      | Caulobacteraceae      | unclassified            |  |
| 0                        | 2   | 0   | 0   | Proteobacteria                                                | Alphaproteobacteria | Rhizobiales           | Brucellaceae          | unclassified            |  |
| 0                        | 13  | 0   | 0   | Proteobacteria                                                | Gammaproteobacteria | Xanthomonadales       | Xanthomonadaceae      | Lysobacter              |  |
| 0                        | 2   | 2   | 0   | Proteobacteria                                                | Alphaproteobacteria | Sphingomonadales      | Sphingomonadaceae     | Sphingomonas            |  |
| 0                        | 0   | 0   | 1   | Proteobacteria                                                | unclassified        | unclassified          | unclassified          | unclassified            |  |
| 0                        | 1   | 0   | 0   | Proteobacteria                                                | Alphaproteobacteria | Rhodobacteriales      | Rhodobacteraceae      | unclassified            |  |
| 0                        | 1   | 0   | 0   | Proteobacteria                                                | Gammaproteobacteria | Xanthomonadales       | Xanthomonadaceae      | unclassified            |  |
| 0                        | 0   | 7   | 0   | Proteobacteria                                                | Gammaproteobacteria | Pseudomonadales       | Moraxellaceae         | Moraxella               |  |
| 0                        | 2   | 0   | 0   | Proteobacteria                                                | Gammaproteobacteria | Xanthomonadales       | Xanthomonadaceae      | unclassified            |  |
| 0                        | 2   | 0   | 0   | Proteobacteria                                                | Gammaproteobacteria | Xanthomonadales       | Sinobacteraceae       | unclassified            |  |
| 0                        | 0   | 0   | 0   | Proteobacteria                                                | Alphaproteobacteria | Caulobacteriales      | Caulobacteraceae      | Caulobacter             |  |
| 0                        | 3   | 0   | 0   | Proteobacteria                                                | Alphaproteobacteria | Sphingomonadales      | Sphingomonadaceae     | unclassified            |  |
| 0                        | 0   | 1   | 0   | Proteobacteria                                                | Alphaproteobacteria | Rhizobiales           | Hyphomicrobiaceae     | Pedocyclum              |  |
| 0                        | 0   | 2   | 0   | Proteobacteria                                                | Alphaproteobacteria | Rhizobiales           | Rhizobiaceae          | Kaistia                 |  |
| 0                        | 0   | 1   | 0   | Proteobacteria                                                | Alphaproteobacteria | Rickettsiales         | Anaplasmataceae       | Anaplasma               |  |
| 0                        | 0   | 2   | 1   | Proteobacteria                                                | Alphaproteobacteria | Caulobacteriales      | Caulobacteraceae      | unclassified            |  |
| 0                        | 1   | 0   | 0   | Proteobacteria                                                | Alphaproteobacteria | Rhodospirillales      | Rhodospirillaceae     | unclassified            |  |
| 0                        | 1   | 0   | 0   | Proteobacteria                                                | Alphaproteobacteria | Rhizobiales           | unclassified          | unclassified            |  |
| 0                        | 5   | 0   | 0   | Proteobacteria                                                | Alphaproteobacteria | Sphingomonadales      | Erythrobacteraceae    | unclassified            |  |
| 0                        | 1   | 0   | 0   | Proteobacteria                                                | Betaproteobacteria  | Rhodocyclales         | Rhodocyclaceae        | Dechloromonas           |  |
| 4                        | 7   | 0   | 1   | Proteobacteria                                                | Alphaproteobacteria | Rhizobiales           | unclassified          | unclassified            |  |
| 0                        | 3   | 1   | 2   | Proteobacteria                                                | Alphaproteobacteria | Rhizobiales           | Rhizobiaceae          | unclassified            |  |
| 0                        | 0   | 0   | 1   | Proteobacteria                                                | Alphaproteobacteria | Rhizobiales           | Xanthobacteraceae     | Labrys                  |  |
| 0                        | 1   | 0   | 0   | Proteobacteria                                                | Alphaproteobacteria | Sphingomonadales      | Sphingomonadaceae     | unclassified            |  |
| 0                        | 2   | 0   | 0   | Proteobacteria                                                | Alphaproteobacteria | Caulobacteriales      | Caulobacteraceae      | Brevimonas              |  |
| 0                        | 0   | 0   | 0   | Proteobacteria                                                | Gammaproteobacteria | Xanthomonadales       | unclassified          | unclassified            |  |
| 0                        | 1   | 0   | 0   | Proteobacteria                                                | Betaproteobacteria  | Burkholderiales       | unclassified          | unclassified            |  |
| 0                        | 14  | 0   | 0   | Proteobacteria                                                | Betaproteobacteria  | Burkholderiales       | Burkholderiaceae      | unclassified            |  |
| 0                        | 0   | 2   | 1   | Proteobacteria                                                | Betaproteobacteria  | Methylphylloales      | Methylphylloaceae     | unclassified            |  |
| 0                        | 0   | 0   | 1   | Proteobacteria                                                | Alphaproteobacteria | Rhodospirillales      | Acetobacteraceae      | Roseomonas              |  |
| 0                        | 5   | 0   | 2   | Proteobacteria                                                | Betaproteobacteria  | Rhodospirillales      | unclassified          | unclassified            |  |
| 0                        | 0   | 0   | 2   | Proteobacteria                                                | Betaproteobacteria  | Rhodospirillales      | Acetobacteraceae      | unclassified            |  |
| 0                        | 109 | 0   | 0   | Proteobacteria                                                | Betaproteobacteria  | Rhodocyclales         | Rhodocyclaceae        | unclassified            |  |
| 0                        | 1   | 0   | 0   | Proteobacteria                                                | Gammaproteobacteria | Xanthomonadales       | Xanthomonadaceae      | unclassified            |  |
| 0                        | 1   | 0   | 0   | Proteobacteria                                                | Betaproteobacteria  | Burkholderiales       | Alcaligenaceae        | unclassified            |  |
| 0                        | 2   | 0   | 0   | Proteobacteria                                                | Deltaproteobacteria | Mycococcales          | unclassified          | unclassified            |  |
| 1                        | 0   | 0   | 0   | Proteobacteria                                                | Alphaproteobacteria | Rhodobacteriales      | Rhodobacteraceae      | Amaricoccus             |  |
| 0                        | 0   | 1   | 0   | Proteobacteria                                                | Alphaproteobacteria | Rhizobiales           | unclassified          | unclassified            |  |
| 0                        | 0   | 1   | 0   | Proteobacteria                                                | Alphaproteobacteria | Rickettsiales         | unclassified          | unclassified            |  |
| 0                        | 0   | 0   | 0   | Proteobacteria                                                | Alphaproteobacteria | Sphingomonadales      | unclassified          | unclassified            |  |
| 0                        | 1   | 3   | 0   | Proteobacteria                                                | Deltaproteobacteria | CTD005-828-02         | unclassified          | unclassified            |  |
| 0                        | 2   | 0   | 0   | Proteobacteria                                                | Gammaproteobacteria | Xanthomonadales       | Xanthomonadaceae      | unclassified            |  |
| 0                        | 1   | 0   | 0   | Proteobacteria                                                | Alphaproteobacteria | Sphingomonadales      | Erythrobacteraceae    | unclassified            |  |

Table 55 (part I): OTUs, no. of reads and corresponding taxonomic affiliation of detected bacterial 16S rRNA amplicons by 454 pyrotag sequencing. Please note, the data shown here were either rank normalized or sum normalized (to 5000 reads per sample) before performing statistical analysis as depicted in the manuscript.

| Samples and no. of reads |     |    |     |     |                | taxonomic classification of bacterial 16S rRNA gene amplicons |                      |                       |                   |                  |              |
|--------------------------|-----|----|-----|-----|----------------|---------------------------------------------------------------|----------------------|-----------------------|-------------------|------------------|--------------|
| OTU                      | URL | CO | CNS | CRS | order          | phylum                                                        | class                | order                 | class             | genus            | genus        |
| 255                      | 0   | 1  | 0   | 0   | Proteobacteria | unclassified                                                  | unclassified         | unclassified          | family            | unclassified     | unclassified |
| 256                      | 0   | 0  | 1   | 0   | Proteobacteria | Alphaproteobacteria                                           | Rhizobiales          | Methylobacteriaceae   | Methylobacterium  | Methylobacterium | unclassified |
| 265                      | 0   | 2  | 0   | 0   | Proteobacteria | Betaproteobacteria                                            | Burkholderiales      | Alcaligenaceae        | unclassified      | unclassified     | unclassified |
| 273                      | 0   | 0  | 2   | 0   | Proteobacteria | Gammaproteobacteria                                           | Legionellales        | Legionellaceae        | Legionella        | unclassified     | unclassified |
| 275                      | 0   | 2  | 0   | 0   | Proteobacteria | Alphaproteobacteria                                           | Caulobacterales      | Caulobacteraceae      | Brevundimonas     | unclassified     | unclassified |
| 277                      | 0   | 0  | 0   | 1   | Proteobacteria | Betaproteobacteria                                            | unclassified         | unclassified          | unclassified      | unclassified     | unclassified |
| 278                      | 0   | 0  | 2   | 0   | Proteobacteria | Sphingomonadales                                              | Sphingomonadales     | Sphingomonadaceae     | Sphingomonas      | unclassified     | unclassified |
| 279                      | 0   | 1  | 1   | 1   | Proteobacteria | Alphaproteobacteria                                           | Caulobacterales      | Caulobacteraceae      | unclassified      | unclassified     | unclassified |
| 283                      | 0   | 2  | 0   | 0   | Proteobacteria | Alphaproteobacteria                                           | Sphingomonadales     | Sphingomonadaceae     | Zymomonas         | unclassified     | unclassified |
| 289                      | 0   | 0  | 2   | 0   | Proteobacteria | Alphaproteobacteria                                           | Rhodobacteriales     | Rhodobacteraceae      | Rubellimicrobium  | unclassified     | unclassified |
| 291                      | 0   | 1  | 0   | 0   | Proteobacteria | Gammaproteobacteria                                           | unclassified         | unclassified          | unclassified      | unclassified     | unclassified |
| 292                      | 0   | 0  | 1   | 0   | Proteobacteria | Gammaproteobacteria                                           | Enterobacteriales    | Enterobacteriaceae    | unclassified      | unclassified     | unclassified |
| 295                      | 0   | 1  | 0   | 0   | Proteobacteria | Alphaproteobacteria                                           | Rhizobiales          | Bradyrhizobiaceae     | unclassified      | unclassified     | unclassified |
| 297                      | 0   | 0  | 2   | 0   | Proteobacteria | Alphaproteobacteria                                           | Rhodospirillales     | Acetobacteraceae      | unclassified      | unclassified     | unclassified |
| 301                      | 0   | 1  | 0   | 0   | Proteobacteria | Gammaproteobacteria                                           | unclassified         | unclassified          | unclassified      | unclassified     | unclassified |
| 304                      | 0   | 15 | 13  | 12  | Proteobacteria | Betaproteobacteria                                            | Burkholderiales      | Oxalobacteraceae      | unclassified      | unclassified     | unclassified |
| 310                      | 0   | 1  | 0   | 0   | Proteobacteria | Alphaproteobacteria                                           | Rhodospirillales     | Rhodospirillaceae     | unclassified      | unclassified     | unclassified |
| 318                      | 1   | 5  | 0   | 0   | Proteobacteria | Gammaproteobacteria                                           | Xanthomonadales      | Xanthomonadaceae      | Rhodanobacter     | unclassified     | unclassified |
| 320                      | 0   | 1  | 0   | 0   | Proteobacteria | Alphaproteobacteria                                           | Sphingomonadales     | unclassified          | unclassified      | unclassified     | unclassified |
| 323                      | 0   | 0  | 0   | 1   | Proteobacteria | Alphaproteobacteria                                           | Sphingomonadales     | Sphingomonadaceae     | unclassified      | unclassified     | unclassified |
| 327                      | 0   | 0  | 2   | 0   | Proteobacteria | Alphaproteobacteria                                           | Rhodospirillales     | Acetobacteraceae      | unclassified      | unclassified     | unclassified |
| 330                      | 0   | 1  | 1   | 0   | Proteobacteria | Gammaproteobacteria                                           | Xanthomonadales      | Xanthomonadaceae      | Xanthomonas       | unclassified     | unclassified |
| 331                      | 0   | 1  | 1   | 1   | Proteobacteria | Gammaproteobacteria                                           | Xanthomonadales      | Xanthomonadaceae      | Stenotrophomonas  | unclassified     | unclassified |
| 332                      | 0   | 1  | 0   | 1   | Proteobacteria | Alphaproteobacteria                                           | Rhodospirillales     | Rhodospirillaceae     | unclassified      | unclassified     | unclassified |
| 335                      | 3   | 13 | 7   | 30  | Proteobacteria | Alphaproteobacteria                                           | Sphingomonadales     | Sphingomonadaceae     | Novosphingobium   | unclassified     | unclassified |
| 336                      | 0   | 0  | 4   | 0   | Proteobacteria | Alphaproteobacteria                                           | Rhodospirillales     | Rhodospirillaceae     | unclassified      | unclassified     | unclassified |
| 340                      | 0   | 0  | 0   | 2   | Proteobacteria | Gammaproteobacteria                                           | Vibrionales          | Vibrionaceae          | Vibrio            | unclassified     | unclassified |
| 352                      | 0   | 2  | 1   | 2   | Proteobacteria | Gammaproteobacteria                                           | Xanthomonadales      | unclassified          | unclassified      | unclassified     | unclassified |
| 358                      | 0   | 1  | 0   | 0   | Proteobacteria | Alphaproteobacteria                                           | Rhodospirillales     | Acetobacteraceae      | Roseomonas        | unclassified     | unclassified |
| 360                      | 0   | 1  | 0   | 0   | Proteobacteria | Gammaproteobacteria                                           | Xanthomonadales      | Xanthomonadaceae      | Lyso bacter       | unclassified     | unclassified |
| 363                      | 0   | 0  | 0   | 2   | Proteobacteria | Gammaproteobacteria                                           | Xanthomonadales      | Xanthomonadaceae      | Stenotrophomonas  | unclassified     | unclassified |
| 364                      | 1   | 0  | 0   | 0   | Proteobacteria | Alphaproteobacteria                                           | Sphingomonadales     | Sphingomonadaceae     | Sphingomonas      | unclassified     | unclassified |
| 369                      | 0   | 1  | 0   | 0   | Proteobacteria | Betaproteobacteria                                            | unclassified         | unclassified          | unclassified      | unclassified     | unclassified |
| 374                      | 0   | 6  | 7   | 6   | Proteobacteria | Alphaproteobacteria                                           | Rhodospirillales     | Acetobacteraceae      | unclassified      | unclassified     | unclassified |
| 375                      | 0   | 0  | 0   | 0   | Proteobacteria | Betaproteobacteria                                            | Burkholderiales      | Alcaligenaceae        | unclassified      | unclassified     | unclassified |
| 376                      | 0   | 2  | 0   | 0   | Proteobacteria | Alphaproteobacteria                                           | Rhodobacteriales     | Rhodobacteraceae      | unclassified      | unclassified     | unclassified |
| 377                      | 1   | 0  | 0   | 0   | Proteobacteria | Alphaproteobacteria                                           | Rhodobacteriales     | Rhodobacteraceae      | unclassified      | unclassified     | unclassified |
| 379                      | 0   | 2  | 3   | 1   | Proteobacteria | Alphaproteobacteria                                           | Rhizobiales          | Hyphomicrobiaceae     | Devosia           | unclassified     | unclassified |
| 381                      | 1   | 0  | 1   | 1   | Proteobacteria | Alphaproteobacteria                                           | Rhodobacteriales     | Rhodobacteraceae      | Amaricoccus       | unclassified     | unclassified |
| 383                      | 2   | 0  | 1   | 0   | Proteobacteria | Gammaproteobacteria                                           | Xanthomonadales      | Xanthomonadaceae      | Pseudoxanthomonas | unclassified     | unclassified |
| 384                      | 0   | 2  | 37  | 0   | Proteobacteria | Betaproteobacteria                                            | Burkholderiales      | Oxalobacteraceae      | unclassified      | unclassified     | unclassified |
| 385                      | 0   | 0  | 0   | 0   | Proteobacteria | Alphaproteobacteria                                           | unclassified         | unclassified          | unclassified      | unclassified     | unclassified |
| 386                      | 0   | 1  | 0   | 0   | Proteobacteria | Betaproteobacteria                                            | Burkholderiales      | Oxalobacteraceae      | unclassified      | unclassified     | unclassified |
| 390                      | 0   | 1  | 0   | 0   | Proteobacteria | Betaproteobacteria                                            | Neisseriales         | Neisseriaceae         | Kingella          | unclassified     | unclassified |
| 396                      | 0   | 0  | 31  | 0   | Proteobacteria | Gammaproteobacteria                                           | Legionellales        | Legionellaceae        | unclassified      | unclassified     | unclassified |
| 402                      | 0   | 0  | 2   | 0   | Proteobacteria | Betaproteobacteria                                            | Burkholderiales      | unclassified          | unclassified      | unclassified     | unclassified |
| 406                      | 0   | 0  | 1   | 0   | Proteobacteria | Alphaproteobacteria                                           | Rhodospirillales     | Rhodospirillaceae     | unclassified      | unclassified     | unclassified |
| 420                      | 0   | 1  | 0   | 2   | Proteobacteria | Alphaproteobacteria                                           | Rhodospirillales     | Acetobacteraceae      | Roseomonas        | unclassified     | unclassified |
| 423                      | 0   | 1  | 0   | 0   | Proteobacteria | Alphaproteobacteria                                           | Rhodospirillales     | Acetobacteraceae      | unclassified      | unclassified     | unclassified |
| 424                      | 1   | 1  | 7   | 0   | Proteobacteria | Gammaproteobacteria                                           | Xanthomonadales      | Xanthomonadaceae      | Arenimonas        | unclassified     | unclassified |
| 435                      | 0   | 1  | 0   | 0   | Proteobacteria | Alphaproteobacteria                                           | Rhizobiales          | Bradyrhizobiaceae     | unclassified      | unclassified     | unclassified |
| 440                      | 0   | 1  | 0   | 1   | Proteobacteria | Alphaproteobacteria                                           | Rhodobacteriales     | Rhodobacteraceae      | Rubellimicrobium  | unclassified     | unclassified |
| 446                      | 0   | 7  | 0   | 0   | Proteobacteria | Alphaproteobacteria                                           | Rhodobacteriales     | Rhodobacteraceae      | unclassified      | unclassified     | unclassified |
| 448                      | 0   | 1  | 1   | 0   | Proteobacteria | Alphaproteobacteria                                           | Rhizobiales          | Bradyrhizobiaceae     | unclassified      | unclassified     | unclassified |
| 467                      | 0   | 2  | 0   | 0   | Proteobacteria | Alphaproteobacteria                                           | Rhodobacteriales     | Rhodobacteraceae      | Paracoccus        | unclassified     | unclassified |
| 468                      | 0   | 0  | 1   | 1   | Proteobacteria | unclassified                                                  | unclassified         | unclassified          | unclassified      | unclassified     | unclassified |
| 469                      | 0   | 0  | 0   | 1   | Proteobacteria | Alphaproteobacteria                                           | Sphingomonadales     | Sphingomonadaceae     | Sphingomonas      | unclassified     | unclassified |
| 479                      | 0   | 0  | 1   | 0   | Proteobacteria | Deltaproteobacteria                                           | CTD005-828-02        | unclassified          | unclassified      | unclassified     | unclassified |
| 484                      | 0   | 0  | 3   | 0   | Proteobacteria | Gammaproteobacteria                                           | Xanthomonadales      | Xanthomonadaceae      | unclassified      | unclassified     | unclassified |
| 486                      | 0   | 3  | 0   | 0   | Proteobacteria | Betaproteobacteria                                            | unclassified         | unclassified          | unclassified      | unclassified     | unclassified |
| 488                      | 0   | 2  | 0   | 0   | Proteobacteria | Gammaproteobacteria                                           | unclassified         | unclassified          | unclassified      | unclassified     | unclassified |
| 490                      | 0   | 6  | 0   | 5   | Proteobacteria | Alphaproteobacteria                                           | Rhizobiales          | Methylobacteriaceae   | Methylobacterium  | unclassified     | unclassified |
| 491                      | 0   | 1  | 0   | 0   | Proteobacteria | Alphaproteobacteria                                           | Rhodobacteriales     | Rhodobacteraceae      | unclassified      | unclassified     | unclassified |
| 494                      | 0   | 1  | 0   | 0   | Proteobacteria | Gammaproteobacteria                                           | Enterobacteriales    | Enterobacteriaceae    | unclassified      | unclassified     | unclassified |
| 495                      | 0   | 1  | 0   | 0   | Proteobacteria | Alphaproteobacteria                                           | Sphingomonadales     | Sphingomonadaceae     | unclassified      | unclassified     | unclassified |
| 497                      | 0   | 1  | 0   | 0   | Proteobacteria | Deltaproteobacteria                                           | Mycococcales         | Polyangiaceae         | unclassified      | unclassified     | unclassified |
| 501                      | 0   | 0  | 1   | 0   | Proteobacteria | Gammaproteobacteria                                           | Chromatiales         | Sinobacteraceae       | unclassified      | unclassified     | unclassified |
| 505                      | 0   | 0  | 0   | 1   | Proteobacteria | Deltaproteobacteria                                           | Mycococcales         | Polyangiaceae         | unclassified      | unclassified     | unclassified |
| 508                      | 0   | 0  | 1   | 1   | Proteobacteria | Alphaproteobacteria                                           | Rhizobiales          | Methylobacteriaceae   | Methylobacterium  | unclassified     | unclassified |
| 509                      | 0   | 0  | 0   | 0   | Proteobacteria | Alphaproteobacteria                                           | Sphingomonadales     | unclassified          | unclassified      | unclassified     | unclassified |
| 511                      | 0   | 1  | 3   | 0   | Proteobacteria | Alphaproteobacteria                                           | Rhizobiales          | Hyphomicrobiaceae     | Rhodoplanes       | unclassified     | unclassified |
| 512                      | 1   | 0  | 2   | 0   | Proteobacteria | Alphaproteobacteria                                           | Rhizobiales          | Bradyrhizobiaceae     | Bosea             | unclassified     | unclassified |
| 522                      | 0   | 0  | 1   | 0   | Proteobacteria | Alphaproteobacteria                                           | Rhizobiales          | Phyllobacteriaceae    | unclassified      | unclassified     | unclassified |
| 523                      | 0   | 1  | 0   | 0   | Proteobacteria | Betaproteobacteria                                            | Rhodocyclales        | Rhodocyclaceae        | Aromatoleum       | unclassified     | unclassified |
| 531                      | 0   | 2  | 2   | 0   | Proteobacteria | Deltaproteobacteria                                           | Rickettsiales        | Rickettsiaceae        | Rickettsia        | unclassified     | unclassified |
| 538                      | 0   | 1  | 0   | 0   | Proteobacteria | Deltaproteobacteria                                           | Desulfobacteriales   | Desulfobacteraceae    | unclassified      | unclassified     | unclassified |
| 539                      | 0   | 0  | 0   | 0   | Proteobacteria | Alphaproteobacteria                                           | Rhizobiales          | Phyllobacteriaceae    | unclassified      | unclassified     | unclassified |
| 540                      | 0   | 1  | 0   | 0   | Proteobacteria | Betaproteobacteria                                            | Gallionellales       | Gallionellaceae       | unclassified      | unclassified     | unclassified |
| 544                      | 0   | 13 | 4   | 6   | Proteobacteria | Alphaproteobacteria                                           | Sphingomonadales     | Sphingomonadaceae     | Sphingomonas      | unclassified     | unclassified |
| 549                      | 0   | 0  | 4   | 0   | Proteobacteria | Alphaproteobacteria                                           | Rhizobiales          | Aurantimonadaceae     | unclassified      | unclassified     | unclassified |
| 550                      | 0   | 1  | 0   | 1   | Proteobacteria | Alphaproteobacteria                                           | Rhodobacteriales     | Rhodobacteraceae      | Amaricoccus       | unclassified     | unclassified |
| 552                      | 0   | 0  | 1   | 0   | Proteobacteria | Alphaproteobacteria                                           | unclassified         | unclassified          | unclassified      | unclassified     | unclassified |
| 556                      | 1   | 3  | 1   | 0   | Proteobacteria | Alphaproteobacteria                                           | Sphingomonadales     | Sphingomonadaceae     | unclassified      | unclassified     | unclassified |
| 559                      | 0   | 0  | 0   | 0   | Proteobacteria | Gammaproteobacteria                                           | Xanthomonadales      | Xanthomonadaceae      | unclassified      | unclassified     | unclassified |
| 561                      | 0   | 2  | 0   | 0   | Proteobacteria | Alphaproteobacteria                                           | Rhizobiales          | Aurantimonadaceae     | unclassified      | unclassified     | unclassified |
| 564                      | 0   | 1  | 0   | 0   | Proteobacteria | Deltaproteobacteria                                           | MIZ64                | unclassified          | unclassified      | unclassified     | unclassified |
| 570                      | 0   | 1  | 0   | 0   | Proteobacteria | Deltaproteobacteria                                           | Idellolobivirionales | Idellolobivirionaceae | Idellolobivirio   | unclassified     | unclassified |
| 573                      | 0   | 1  | 0   | 0   | Proteobacteria | Alphaproteobacteria                                           | Rhodospirillales     | Acetobacteraceae      | unclassified      | unclassified     | unclassified |
| 582                      | 0   | 8  | 1   | 0   | Proteobacteria | Alphaproteobacteria                                           | Rhizobiales          | Hyphomicrobiaceae     | Devosia           | unclassified     | unclassified |
| 590                      | 0   | 0  | 1   | 0   | Proteobacteria | Gammaproteobacteria                                           | Chromatiales         | Sinobacteraceae       | unclassified      | unclassified     | unclassified |
| 600                      | 0   | 0  | 0   | 0   | Proteobacteria | Alphaproteobacteria                                           | Rhodobacteriales     | Rhodobacteraceae      | Paracoccus        | unclassified     | unclassified |
| 605                      | 0   | 0  | 2   | 2   | Proteobacteria | Alphaproteobacteria                                           | Rhizobiales          | unclassified          | unclassified      | unclassified     | unclassified |
| 607                      | 0   | 4  | 0   | 0   | Proteobacteria | Alphaproteobacteria                                           | Sphingomonadales     | Sphingomonadaceae     | unclassified      | unclassified     | unclassified |
| 608                      | 0   | 0  | 0   | 1   | Proteobacteria | Gammaproteobacteria                                           | Pseudomonadales      | Moraxellaceae         | Psychrobacter     | unclassified     | unclassified |
| 609                      | 0   | 8  | 9   | 11  | Proteobacteria | Alphaproteobacteria                                           | Rhodospirillales     | Acetobacteraceae      | Roseomonas        | unclassified     | unclassified |
| 627                      | 0   | 0  | 0   | 2   | Proteobacteria | Gammaproteobacteria                                           | Pseudomonadales      | Pseudomonadaceae      | Pseudomonas       | unclassified     | unclassified |
| 628                      | 1   | 0  | 0   | 0   | Proteobacteria | Betaproteobacteria                                            | Rhodocyclales        | unclassified          | unclassified      | unclassified     | unclassified |
| 629                      | 0   | 0  | 0   | 0   | Proteobacteria | Alphaproteobacteria                                           | Sphingomonadales     | unclassified          | unclassified      | unclassified     | unclassified |
| 630                      | 0   | 1  | 0   | 0   | Proteobacteria | Alphaproteobacteria                                           | Sphingomonadales     | Sphingomonadaceae     | Kaistobacter      | unclassified     | unclassified |
| 631                      | 0   | 1  | 0   | 0   | Proteobacteria | Alphaproteobacteria                                           | Rhodospirillales     | Acetobacteraceae      | Roseomonas        | unclassified     | unclassified |

Table 55 (part I): OTUs, no. of reads and corresponding taxonomic affiliation of detected bacterial 16S rRNA amplicons by 454 pyrotag sequencing. Please note, the data shown here were either rank normalized or sum normalized (to 5000 reads per sample) before performing statistical analysis as depicted in the manuscript.

| URLs and no. of reads |    |     |     |  | taxonomic classification of bacterial 16S rRNA gene amplicons |                     |                     |                       |                   |
|-----------------------|----|-----|-----|--|---------------------------------------------------------------|---------------------|---------------------|-----------------------|-------------------|
| URL                   | CO | CRS | CRS |  | phylum                                                        | class               | order               | family                | genus             |
| 0                     | 0  | 2   | 0   |  | Proteobacteria                                                | Betaproteobacteria  | unclassified        | unclassified          |                   |
| 0                     | 1  | 0   | 0   |  | Proteobacteria                                                | Gammaproteobacteria | Enterobacteriales   | Enterobacteriaceae    | unclassified      |
| 0                     | 0  | 1   | 0   |  | Proteobacteria                                                | Alphaproteobacteria | Rhizobiales         | unclassified          | unclassified      |
| 0                     | 0  | 1   | 0   |  | Proteobacteria                                                | Alphaproteobacteria | Rhizobiales         | unclassified          | unclassified      |
| 10                    | 0  | 8   | 0   |  | Proteobacteria                                                | Alphaproteobacteria | Sphingomonadales    | Sphingomonadaceae     | Sphingomonas      |
| 0                     | 1  | 4   | 0   |  | Proteobacteria                                                | Alphaproteobacteria | Rhizobiales         | unclassified          | unclassified      |
| 0                     | 0  | 1   | 0   |  | Proteobacteria                                                | Gammaproteobacteria | Chromatiales        | Sinobacteraceae       | unclassified      |
| 0                     | 1  | 0   | 0   |  | Proteobacteria                                                | Alphaproteobacteria | Rhodobacteriales    | Rhodobacteraceae      | unclassified      |
| 0                     | 0  | 2   | 2   |  | Proteobacteria                                                | Alphaproteobacteria | Sphingomonadales    | Erythrobacteraceae    | unclassified      |
| 0                     | 0  | 0   | 1   |  | Proteobacteria                                                | Alphaproteobacteria | Rhodospirillales    | Rhodospirillaceae     | unclassified      |
| 0                     | 5  | 0   | 0   |  | Proteobacteria                                                | Betaproteobacteria  | Burkholderiales     | Burkholderiaceae      | unclassified      |
| 0                     | 0  | 3   | 0   |  | Proteobacteria                                                | Alphaproteobacteria | Rhodospirillales    | Acetobacteraceae      | unclassified      |
| 0                     | 1  | 1   | 0   |  | Proteobacteria                                                | Alphaproteobacteria | Sphingomonadales    | Sphingomonadaceae     | Sphingomonas      |
| 2                     | 2  | 13  | 1   |  | Proteobacteria                                                | Alphaproteobacteria | Rhodospirillales    | Rhodospirillaceae     | Skenanella        |
| 1                     | 0  | 0   | 0   |  | Proteobacteria                                                | Betaproteobacteria  | unclassified        | unclassified          | unclassified      |
| 0                     | 0  | 0   | 1   |  | Proteobacteria                                                | Gammaproteobacteria | unclassified        | unclassified          | unclassified      |
| 1                     | 0  | 0   | 0   |  | Proteobacteria                                                | Gammaproteobacteria | Alteromonadales     | Chromatiaceae         | Rheinheimera      |
| 0                     | 2  | 0   | 0   |  | Proteobacteria                                                | Alphaproteobacteria | Rhizobiales         | Hyphomicrobiaceae     | Rhodolanes        |
| 0                     | 1  | 0   | 0   |  | Proteobacteria                                                | Alphaproteobacteria | Pseudomonadales     | Pseudomonadaceae      | Pseudomonas       |
| 0                     | 1  | 0   | 0   |  | Proteobacteria                                                | Alphaproteobacteria | Rhizobiales         | Hyphomicrobiaceae     | Rhodolanes        |
| 0                     | 2  | 0   | 0   |  | Proteobacteria                                                | Deltaproteobacteria | Mycococcales        | unclassified          | unclassified      |
| 0                     | 1  | 0   | 0   |  | Proteobacteria                                                | Alphaproteobacteria | Sphingomonadales    | Sphingomonadaceae     | unclassified      |
| 0                     | 1  | 0   | 0   |  | Proteobacteria                                                | Gammaproteobacteria | Enterobacteriales   | Enterobacteriaceae    | Morganella        |
| 0                     | 0  | 0   | 2   |  | Proteobacteria                                                | Alphaproteobacteria | Rhodobacteriales    | Rhodobacteraceae      | Rhodobacter       |
| 0                     | 1  | 0   | 0   |  | Proteobacteria                                                | Alphaproteobacteria | Rhodobacteriales    | Rhodobacteraceae      | Amaricoccus       |
| 0                     | 0  | 1   | 0   |  | Proteobacteria                                                | Alphaproteobacteria | Rhodospirillales    | Acetobacteraceae      | Rosomonas         |
| 0                     | 1  | 0   | 1   |  | Proteobacteria                                                | Gammaproteobacteria | Xanthomonadales     | Xanthomonadaceae      | Stenotrophomonas  |
| 4                     | 4  | 0   | 0   |  | Proteobacteria                                                | Alphaproteobacteria | Rhodospirillales    | Acetobacteraceae      | unclassified      |
| 1                     | 0  | 0   | 0   |  | Proteobacteria                                                | Alphaproteobacteria | Sphingomonadales    | Erythrobacteraceae    | unclassified      |
| 0                     | 1  | 0   | 0   |  | Proteobacteria                                                | Betaproteobacteria  | Burkholderiales     | Comamonadaceae        | unclassified      |
| 0                     | 2  | 0   | 0   |  | Proteobacteria                                                | Alphaproteobacteria | Rhizobiales         | Hyphomicrobiaceae     | Hyphomicrobium    |
| 0                     | 2  | 0   | 0   |  | Proteobacteria                                                | Alphaproteobacteria | Rhizobiales         | unclassified          | unclassified      |
| 0                     | 0  | 12  | 0   |  | Proteobacteria                                                | Gammaproteobacteria | Enterobacteriales   | Enterobacteriaceae    | Buchnera          |
| 0                     | 1  | 1   | 0   |  | Proteobacteria                                                | Betaproteobacteria  | Burkholderiales     | Alcaligenaceae        | unclassified      |
| 0                     | 1  | 0   | 0   |  | Proteobacteria                                                | Gammaproteobacteria | Oceanospirillales   | Alteromonadaceae      | Cellvibrio        |
| 10                    | 1  | 1   | 1   |  | Proteobacteria                                                | Gammaproteobacteria | Xanthomonadales     | Xanthomonadaceae      | Stenotrophomonas  |
| 0                     | 1  | 0   | 0   |  | Proteobacteria                                                | Alphaproteobacteria | Rhodobacteriales    | Rhodobacteraceae      | unclassified      |
| 0                     | 1  | 0   | 1   |  | Proteobacteria                                                | Alphaproteobacteria | Rhizobiales         | Phyllobacteriaceae    | unclassified      |
| 0                     | 0  | 1   | 0   |  | Proteobacteria                                                | Alphaproteobacteria | Rhizobiales         | Phyllobacteriaceae    | Mesorhizobium     |
| 0                     | 1  | 0   | 0   |  | Proteobacteria                                                | Alphaproteobacteria | Rhodospirillales    | unclassified          | unclassified      |
| 0                     | 0  | 1   | 0   |  | Proteobacteria                                                | Deltaproteobacteria | Mycococcales        | unclassified          | unclassified      |
| 0                     | 0  | 5   | 2   |  | Proteobacteria                                                | Alphaproteobacteria | Rhodobacteriales    | Rhodobacteraceae      | Amaricoccus       |
| 0                     | 1  | 0   | 1   |  | Proteobacteria                                                | Alphaproteobacteria | Rhodobacteriales    | Rhodobacteraceae      | unclassified      |
| 0                     | 4  | 0   | 0   |  | Proteobacteria                                                | Deltaproteobacteria | Mycococcales        | Halangiaceae          | unclassified      |
| 0                     | 1  | 0   | 0   |  | Proteobacteria                                                | Deltaproteobacteria | Mycococcales        | unclassified          | unclassified      |
| 0                     | 1  | 2   | 0   |  | Proteobacteria                                                | Gammaproteobacteria | Chromatiales        | Sinobacteraceae       | unclassified      |
| 0                     | 1  | 0   | 0   |  | Proteobacteria                                                | Betaproteobacteria  | Burkholderiales     | Oxalobacteraceae      | unclassified      |
| 0                     | 1  | 0   | 0   |  | Proteobacteria                                                | Gammaproteobacteria | Rhodospirillales    | Pasturellaceae        | Haemophilus       |
| 6                     | 5  | 3   | 4   |  | Proteobacteria                                                | Alphaproteobacteria | Caulobacteriales    | Caulobacteraceae      | Brevundimonas     |
| 0                     | 0  | 0   | 1   |  | Proteobacteria                                                | Alphaproteobacteria | Rhizobiales         | Beijerinckiaceae      | unclassified      |
| 1                     | 11 | 2   | 1   |  | Proteobacteria                                                | Gammaproteobacteria | Xanthomonadales     | Xanthomonadaceae      | unclassified      |
| 0                     | 4  | 1   | 0   |  | Proteobacteria                                                | Alphaproteobacteria | Sphingomonadales    | Sphingomonadaceae     | Sphingomonas      |
| 0                     | 0  | 1   | 0   |  | Proteobacteria                                                | Alphaproteobacteria | Rhizobiales         | Phyllobacteriaceae    | unclassified      |
| 4                     | 4  | 2   | 1   |  | Proteobacteria                                                | Gammaproteobacteria | Enterobacteriales   | Enterobacteriaceae    | Escherichia       |
| 0                     | 1  | 0   | 0   |  | Proteobacteria                                                | Alphaproteobacteria | Sphingomonadales    | Sphingomonadaceae     | unclassified      |
| 1                     | 0  | 0   | 0   |  | Proteobacteria                                                | Alphaproteobacteria | Sphingomonadales    | unclassified          | unclassified      |
| 3                     | 1  | 7   | 0   |  | Proteobacteria                                                | Alphaproteobacteria | Rhizobiales         | Phyllobacteriaceae    | Mesorhizobium     |
| 0                     | 0  | 0   | 1   |  | Proteobacteria                                                | Gammaproteobacteria | Xanthomonadales     | Xanthomonadaceae      | Ignatzschinera    |
| 0                     | 3  | 1   | 6   |  | Proteobacteria                                                | Alphaproteobacteria | Rhizobiales         | unclassified          | unclassified      |
| 0                     | 1  | 0   | 0   |  | Proteobacteria                                                | Alphaproteobacteria | Rhizobiales         | Hyphomicrobiaceae     | Devosia           |
| 0                     | 0  | 2   | 0   |  | Proteobacteria                                                | Gammaproteobacteria | Xanthomonadales     | Xanthomonadaceae      | unclassified      |
| 0                     | 1  | 0   | 0   |  | Proteobacteria                                                | Betaproteobacteria  | Burkholderiales     | unclassified          | unclassified      |
| 0                     | 1  | 1   | 0   |  | Proteobacteria                                                | Gammaproteobacteria | Xanthomonadales     | Sinobacteraceae       | unclassified      |
| 0                     | 0  | 0   | 1   |  | Proteobacteria                                                | Alphaproteobacteria | Rhodobacteriales    | Rhodobacteraceae      | Amaricoccus       |
| 0                     | 0  | 1   | 0   |  | Proteobacteria                                                | Alphaproteobacteria | Rhizobiales         | Methylocystaceae      | Methylophil       |
| 0                     | 1  | 0   | 0   |  | Proteobacteria                                                | Betaproteobacteria  | Burkholderiales     | Oxalobacteraceae      | unclassified      |
| 0                     | 1  | 0   | 0   |  | Proteobacteria                                                | Alphaproteobacteria | Caulobacteriales    | Caulobacteraceae      | unclassified      |
| 0                     | 6  | 1   | 3   |  | Proteobacteria                                                | Alphaproteobacteria | Sphingomonadales    | Sphingomonadaceae     | unclassified      |
| 0                     | 1  | 0   | 0   |  | Proteobacteria                                                | Alphaproteobacteria | Rhizobiales         | unclassified          | unclassified      |
| 0                     | 0  | 1   | 0   |  | Proteobacteria                                                | Alphaproteobacteria | Rhodospirillales    | Rhodospirillaceae     | unclassified      |
| 0                     | 6  | 7   | 0   |  | Proteobacteria                                                | Alphaproteobacteria | Rhizobiales         | Rhizobiaceae          | Rhizobium         |
| 0                     | 0  | 2   | 0   |  | Proteobacteria                                                | Gammaproteobacteria | Alteromonadales     | Pseudalteromonadaceae | Pseudoalteromonas |
| 0                     | 0  | 1   | 0   |  | Proteobacteria                                                | Deltaproteobacteria | Mycococcales        | unclassified          | unclassified      |
| 0                     | 1  | 1   | 0   |  | Proteobacteria                                                | Gammaproteobacteria | Pseudomonadales     | Pseudomonadaceae      | Pseudomonas       |
| 0                     | 1  | 5   | 0   |  | Proteobacteria                                                | Alphaproteobacteria | Caulobacteriales    | Caulobacteraceae      | unclassified      |
| 0                     | 0  | 0   | 0   |  | Proteobacteria                                                | Betaproteobacteria  | Burkholderiales     | unclassified          | unclassified      |
| 0                     | 0  | 0   | 0   |  | Proteobacteria                                                | Betaproteobacteria  | Burkholderiales     | Comamonadaceae        | unclassified      |
| 0                     | 1  | 0   | 0   |  | Proteobacteria                                                | Alphaproteobacteria | unclassified        | unclassified          | unclassified      |
| 0                     | 1  | 0   | 0   |  | Proteobacteria                                                | Alphaproteobacteria | Rhizobiales         | Phyllobacteriaceae    | unclassified      |
| 0                     | 4  | 5   | 4   |  | Proteobacteria                                                | Gammaproteobacteria | Enterobacteriales   | Enterobacteriaceae    | unclassified      |
| 1                     | 0  | 0   | 0   |  | Proteobacteria                                                | Alphaproteobacteria | Rhizobiales         | Methylobacteriaceae   | Methylobacterium  |
| 0                     | 1  | 0   | 0   |  | Proteobacteria                                                | Alphaproteobacteria | Sphingomonadales    | Sphingomonadaceae     | unclassified      |
| 0                     | 1  | 0   | 0   |  | Proteobacteria                                                | Deltaproteobacteria | Syntrophobacterales | Syntrophobacteraceae  | unclassified      |
| 0                     | 1  | 0   | 0   |  | Proteobacteria                                                | Alphaproteobacteria | Sphingomonadales    | Sphingomonadaceae     | Sphingomonas      |
| 1                     | 1  | 1   | 0   |  | Proteobacteria                                                | Betaproteobacteria  | Burkholderiales     | Oxalobacteraceae      | Massilia          |
| 0                     | 2  | 1   | 0   |  | Proteobacteria                                                | Alphaproteobacteria | unclassified        | unclassified          | unclassified      |
| 0                     | 2  | 1   | 0   |  | Proteobacteria                                                | Alphaproteobacteria | Sphingomonadales    | Sphingomonadaceae     | unclassified      |
| 0                     | 0  | 3   | 1   |  | Proteobacteria                                                | Alphaproteobacteria | Rhodospirillales    | unclassified          | unclassified      |
| 0                     | 1  | 0   | 0   |  | Proteobacteria                                                | Deltaproteobacteria | Mycococcales        | Nannocystaceae        | Plesiocystis      |
| 0                     | 0  | 0   | 0   |  | Proteobacteria                                                | Alphaproteobacteria | Caulobacteriales    | Caulobacteraceae      | Phrynobacterium   |
| 0                     | 0  | 1   | 0   |  | Proteobacteria                                                | Alphaproteobacteria | Sphingomonadales    | Sphingomonadaceae     | Kairiobacter      |
| 2                     | 0  | 0   | 0   |  | Proteobacteria                                                | Alphaproteobacteria | Caulobacteriales    | Caulobacteraceae      | Brevundimonas     |
| 12                    | 11 | 4   | 7   |  | Proteobacteria                                                | Alphaproteobacteria | Rhizobiales         | Rhizobiaceae          | Agrobacterium     |
| 2                     | 0  | 0   | 0   |  | Proteobacteria                                                | Alphaproteobacteria | Sphingomonadales    | Sphingomonadaceae     | unclassified      |
| 0                     | 1  | 0   | 0   |  | Proteobacteria                                                | Betaproteobacteria  | Nitrosomonadales    | Nitrosomonadaceae     | Nitrosomonas      |
| 0                     | 0  | 3   | 0   |  | Proteobacteria                                                | Alphaproteobacteria | Rickettsiales       | Holospiraceae         | unclassified      |
| 0                     | 28 | 0   | 0   |  | Proteobacteria                                                | Gammaproteobacteria | Xanthomonadales     | Xanthomonadaceae      | unclassified      |
| 0                     | 0  | 1   | 0   |  | Proteobacteria                                                | Alphaproteobacteria | Rhodospirillales    | Acetobacteraceae      | Rosomonas         |
| 3                     | 0  | 0   | 0   |  | Proteobacteria                                                | Alphaproteobacteria | Rhodospirillales    | Rhodospirillaceae     | unclassified      |
| 0                     | 7  | 0   | 0   |  | Proteobacteria                                                | Alphaproteobacteria | Sphingomonadales    | Sphingomonadaceae     | unclassified      |

Table S5 (part II): OTUs, no. of reads and corresponding taxonomic affiliation of detected bacterial 16S rRNA amplicons by 454 pyrosequencing. Please note, the data shown here were either rank normalized or sum normalized (to 5000 reads per sample) before performing statistical analysis as depicted in the manuscript.

| Samples and no. of reads |     |    |     |     | taxonomic classification of bacterial 16S rRNA gene amplicons |                       |                    |                     |                  |
|--------------------------|-----|----|-----|-----|---------------------------------------------------------------|-----------------------|--------------------|---------------------|------------------|
| OTU                      | URI | CO | CRS | CRS | phylum                                                        | class                 | order              | family              | genus            |
| 917                      | 0   | 3  | 4   | 0   | Proteobacteria                                                | Alphaproteobacteria   | Sphingomonadales   | Sphingomonadaceae   | Sphingomonas     |
| 919                      | 1   | 0  | 2   | 0   | Proteobacteria                                                | Alphaproteobacteria   | Rhodospirillales   | Rhodospirillaceae   | unclassified     |
| 923                      | 0   | 0  | 0   | 1   | Proteobacteria                                                | Alphaproteobacteria   | Sphingomonadales   | Sphingomonadaceae   | Sphingomonas     |
| 924                      | 0   | 0  | 0   | 3   | Proteobacteria                                                | Alphaproteobacteria   | Sphingomonadales   | Sphingomonadaceae   | unclassified     |
| 925                      | 0   | 0  | 0   | 1   | Proteobacteria                                                | Alphaproteobacteria   | Rhizobiales        | Phyllobacteriaceae  | Mesorhizobium    |
| 930                      | 0   | 1  | 0   | 3   | Proteobacteria                                                | Alphaproteobacteria   | Sphingomonadales   | Sphingomonadaceae   | unclassified     |
| 940                      | 0   | 0  | 2   | 0   | Proteobacteria                                                | Gammaproteobacteria   | Legionellales      | Legionellaceae      | Legionella       |
| 950                      | 2   | 0  | 0   | 0   | Proteobacteria                                                | Alphaproteobacteria   | Sphingomonadales   | Sphingomonadaceae   | Sphingibium      |
| 951                      | 0   | 0  | 0   | 3   | Proteobacteria                                                | Alphaproteobacteria   | Caulobacterales    | Caulobacteraceae    | unclassified     |
| 952                      | 1   | 0  | 0   | 0   | Proteobacteria                                                | Deltaproteobacteria   | Mycococcales       | unclassified        | unclassified     |
| 954                      | 0   | 0  | 0   | 1   | Proteobacteria                                                | Alphaproteobacteria   | Rhizobiales        | Bradyrhizobiaceae   | unclassified     |
| 956                      | 0   | 1  | 0   | 0   | Proteobacteria                                                | Gammaproteobacteria   | Xanthomonadales    | Xanthomonadaceae    | Lyso bacter      |
| 958                      | 0   | 1  | 0   | 0   | Proteobacteria                                                | Sphingomonadales      | Sphingomonadales   | Sphingomonadaceae   | Sphingobium      |
| 961                      | 1   | 0  | 0   | 0   | Proteobacteria                                                | Alphaproteobacteria   | Rhodobacteriales   | Rhodobacteraceae    | Rubellimicrobium |
| 965                      | 0   | 8  | 0   | 0   | Proteobacteria                                                | Alphaproteobacteria   | Rhizobiales        | Hyphomicrobiaceae   | Devosia          |
| 966                      | 0   | 1  | 0   | 0   | Proteobacteria                                                | Gammaproteobacteria   | Oceanospirillales  | OM60                | unclassified     |
| 967                      | 0   | 1  | 0   | 0   | Proteobacteria                                                | Alphaproteobacteria   | Rhizobiales        | Methylobacteriaceae | Methylobacterium |
| 974                      | 1   | 1  | 0   | 0   | Proteobacteria                                                | Epsilonproteobacteria | Campylobacterales  | Campylobacteraceae  | Campylobacter    |
| 975                      | 0   | 4  | 7   | 1   | Proteobacteria                                                | Alphaproteobacteria   | Rhizobiales        | Hyphomicrobiaceae   | Devosia          |
| 979                      | 0   | 1  | 0   | 1   | Proteobacteria                                                | Alphaproteobacteria   | Sphingomonadales   | Sphingomonadaceae   | unclassified     |
| 982                      | 0   | 1  | 0   | 0   | Proteobacteria                                                | Alphaproteobacteria   | Rhizobiales        | Bradyrhizobiaceae   | unclassified     |
| 983                      | 2   | 0  | 0   | 0   | Proteobacteria                                                | Alphaproteobacteria   | Sphingomonadales   | Sphingomonadaceae   | unclassified     |
| 988                      | 0   | 1  | 1   | 0   | Proteobacteria                                                | Alphaproteobacteria   | Rhodobacteriales   | Rhodobacteraceae    | unclassified     |
| 989                      | 0   | 0  | 1   | 1   | Proteobacteria                                                | Alphaproteobacteria   | Caulobacterales    | Caulobacteraceae    | unclassified     |
| 990                      | 0   | 1  | 0   | 0   | Proteobacteria                                                | Alphaproteobacteria   | Rhizobiales        | unclassified        | unclassified     |
| 1004                     | 0   | 1  | 0   | 1   | Proteobacteria                                                | Alphaproteobacteria   | unclassified       | unclassified        | unclassified     |
| 1005                     | 0   | 1  | 0   | 0   | Proteobacteria                                                | Alphaproteobacteria   | Sphingomonadales   | Sphingomonadaceae   | Sphingomonas     |
| 1006                     | 0   | 0  | 4   | 1   | Proteobacteria                                                | Alphaproteobacteria   | Rhizobiales        | Phyllobacteriaceae  | unclassified     |
| 1010                     | 0   | 0  | 1   | 0   | Proteobacteria                                                | Gammaproteobacteria   | Pseudomonadales    | Moraxellaceae       | Psychrobacter    |
| 1012                     | 0   | 1  | 0   | 0   | Proteobacteria                                                | Alphaproteobacteria   | Caulobacterales    | Caulobacteraceae    | unclassified     |
| 1016                     | 0   | 16 | 0   | 0   | Proteobacteria                                                | Alphaproteobacteria   | Rhodobacteriales   | Rhodobacteraceae    | Paracoccus       |
| 1017                     | 0   | 0  | 1   | 0   | Proteobacteria                                                | Alphaproteobacteria   | Rhodospirillales   | Rhodospirillaceae   | Azospirillum     |
| 1020                     | 0   | 3  | 2   | 0   | Proteobacteria                                                | Alphaproteobacteria   | Rhodobacteriales   | Rhodobacteraceae    | Rubellimicrobium |
| 1023                     | 4   | 0  | 0   | 0   | Proteobacteria                                                | Betaproteobacteria    | unclassified       | unclassified        | unclassified     |
| 1025                     | 0   | 1  | 0   | 1   | Proteobacteria                                                | Deltaproteobacteria   | Mycococcales       | Haliangaceae        | unclassified     |
| 1035                     | 0   | 0  | 1   | 0   | Proteobacteria                                                | Alphaproteobacteria   | Rhodospirillales   | Acetobacteraceae    | Roseomonas       |
| 1037                     | 0   | 3  | 0   | 0   | Proteobacteria                                                | Alphaproteobacteria   | Xanthomonadales    | Xanthomonadaceae    | unclassified     |
| 1040                     | 0   | 1  | 0   | 0   | Proteobacteria                                                | Alphaproteobacteria   | Rhizobiales        | unclassified        | unclassified     |
| 1042                     | 0   | 1  | 0   | 0   | Proteobacteria                                                | Alphaproteobacteria   | unclassified       | unclassified        | unclassified     |
| 1043                     | 0   | 0  | 0   | 3   | Proteobacteria                                                | Alphaproteobacteria   | Sphingomonadales   | Sphingomonadaceae   | Sphingomonas     |
| 1044                     | 0   | 0  | 1   | 1   | Proteobacteria                                                | Gammaproteobacteria   | Xanthomonadales    | Xanthomonadaceae    | unclassified     |
| 1046                     | 0   | 0  | 1   | 0   | Proteobacteria                                                | Alphaproteobacteria   | Rhodospirillales   | Acetobacteraceae    | unclassified     |
| 1047                     | 0   | 1  | 0   | 0   | Proteobacteria                                                | Alphaproteobacteria   | Rhizobiales        | Hyphomicrobiaceae   | unclassified     |
| 1048                     | 0   | 0  | 0   | 1   | Proteobacteria                                                | Alphaproteobacteria   | Rhodobacteriales   | Rhodobacteraceae    | Rubellimicrobium |
| 1052                     | 0   | 1  | 0   | 0   | Proteobacteria                                                | Alphaproteobacteria   | Rhizobiales        | Hyphomicrobiaceae   | Pedomicrobium    |
| 1055                     | 0   | 1  | 1   | 1   | Proteobacteria                                                | Alphaproteobacteria   | Rhizobiales        | Bradyrhizobiaceae   | Rhodopseudomonas |
| 1056                     | 0   | 0  | 0   | 0   | Proteobacteria                                                | Betaproteobacteria    | Burkholderiales    | unclassified        | unclassified     |
| 1059                     | 0   | 0  | 0   | 0   | Proteobacteria                                                | Alphaproteobacteria   | Acetobacterales    | unclassified        | unclassified     |
| 1061                     | 0   | 2  | 0   | 0   | Proteobacteria                                                | Alphaproteobacteria   | Rhizobiales        | Phyllobacteriaceae  | unclassified     |
| 1063                     | 1   | 1  | 3   | 1   | Proteobacteria                                                | Alphaproteobacteria   | Rhizobiales        | Methylobacteriaceae | Methylobacterium |
| 1065                     | 0   | 16 | 0   | 0   | Proteobacteria                                                | Gammaproteobacteria   | Oceanospirillales  | Alteromonadaceae    | Marinobacter     |
| 1066                     | 0   | 1  | 0   | 0   | Proteobacteria                                                | Alphaproteobacteria   | Rhizobiales        | unclassified        | unclassified     |
| 1067                     | 1   | 0  | 4   | 0   | Proteobacteria                                                | Alphaproteobacteria   | Rhodospirillales   | Rhodospirillaceae   | unclassified     |
| 1075                     | 0   | 0  | 0   | 1   | Proteobacteria                                                | Gammaproteobacteria   | Xanthomonadales    | Xanthomonadaceae    | Xanthomonas      |
| 1082                     | 0   | 0  | 1   | 1   | Proteobacteria                                                | Alphaproteobacteria   | Rhodospirillales   | Acetobacteraceae    | unclassified     |
| 1086                     | 0   | 1  | 0   | 1   | Proteobacteria                                                | Alphaproteobacteria   | Rhizobiales        | Methylobacteriaceae | Methylobacterium |
| 1089                     | 0   | 2  | 1   | 1   | Proteobacteria                                                | Alphaproteobacteria   | Rhodobacteriales   | Rhodobacteraceae    | unclassified     |
| 1092                     | 0   | 0  | 0   | 1   | Proteobacteria                                                | Betaproteobacteria    | Burkholderiales    | Oxalobacteraceae    | Massilia         |
| 1093                     | 1   | 13 | 9   | 2   | Proteobacteria                                                | Alphaproteobacteria   | Rhodospirillales   | Acetobacteraceae    | unclassified     |
| 1097                     | 1   | 0  | 0   | 0   | Proteobacteria                                                | Alphaproteobacteria   | Caulobacterales    | Caulobacteraceae    | Brevundimonas    |
| 1100                     | 1   | 4  | 4   | 1   | Proteobacteria                                                | Betaproteobacteria    | Burkholderiales    | unclassified        | unclassified     |
| 1104                     | 0   | 0  | 0   | 0   | Proteobacteria                                                | Alphaproteobacteria   | Sphingomonadales   | Sphingomonadaceae   | unclassified     |
| 1110                     | 3   | 2  | 0   | 1   | Proteobacteria                                                | Alphaproteobacteria   | Rhodobacteriales   | Caulobacteraceae    | unclassified     |
| 1114                     | 0   | 1  | 0   | 0   | Proteobacteria                                                | Alphaproteobacteria   | Rhodobacteriales   | Rhodobacteraceae    | Rubellimicrobium |
| 1122                     | 0   | 5  | 1   | 0   | Proteobacteria                                                | Alphaproteobacteria   | Rhodobacteriales   | Rhodobacteraceae    | Amarillococcus   |
| 1124                     | 0   | 0  | 0   | 6   | Proteobacteria                                                | Alphaproteobacteria   | Rhodospirillales   | Rhodospirillaceae   | unclassified     |
| 1125                     | 0   | 0  | 5   | 0   | Proteobacteria                                                | Gammaproteobacteria   | Enterobacteriales  | Enterobacteriaceae  | Pantoea          |
| 1129                     | 0   | 4  | 0   | 0   | Proteobacteria                                                | Alphaproteobacteria   | Rhizobiales        | unclassified        | unclassified     |
| 1130                     | 0   | 1  | 0   | 1   | Proteobacteria                                                | Alphaproteobacteria   | Rhodospirillales   | Acetobacteraceae    | unclassified     |
| 1134                     | 1   | 5  | 0   | 0   | Proteobacteria                                                | Alphaproteobacteria   | Rhodospirillales   | Acetobacteraceae    | unclassified     |
| 1136                     | 0   | 2  | 0   | 0   | Proteobacteria                                                | Gammaproteobacteria   | Xanthomonadales    | Xanthomonadaceae    | unclassified     |
| 1143                     | 0   | 1  | 0   | 0   | Proteobacteria                                                | Deltaproteobacteria   | CTD005-828-02      | unclassified        | unclassified     |
| 1147                     | 0   | 0  | 1   | 0   | Proteobacteria                                                | Alphaproteobacteria   | Caulobacterales    | Caulobacteraceae    | unclassified     |
| 1151                     | 0   | 1  | 0   | 0   | Proteobacteria                                                | Alphaproteobacteria   | Rhizobiales        | Phyllobacteriaceae  | unclassified     |
| 1153                     | 0   | 0  | 1   | 0   | Proteobacteria                                                | Alphaproteobacteria   | Rhizobiales        | Methylobacteriaceae | unclassified     |
| 1155                     | 0   | 0  | 0   | 1   | Proteobacteria                                                | Erythrobacteriales    | Erythrobacteraceae | unclassified        | unclassified     |
| 1159                     | 0   | 5  | 0   | 0   | Proteobacteria                                                | Alphaproteobacteria   | Sphingomonadales   | unclassified        | unclassified     |
| 1160                     | 0   | 3  | 0   | 1   | Proteobacteria                                                | Alphaproteobacteria   | Caulobacterales    | Caulobacteraceae    | unclassified     |
| 1162                     | 1   | 0  | 0   | 1   | Proteobacteria                                                | Alphaproteobacteria   | Sphingomonadales   | unclassified        | unclassified     |
| 1170                     | 0   | 3  | 0   | 0   | Proteobacteria                                                | Alphaproteobacteria   | Rhodobacteriales   | Rhodobacteraceae    | unclassified     |
| 1172                     | 0   | 3  | 0   | 0   | Proteobacteria                                                | Alphaproteobacteria   | Sphingomonadales   | Erythrobacteraceae  | Lutibacterium    |
| 1176                     | 44  | 0  | 0   | 1   | Proteobacteria                                                | Gammaproteobacteria   | Xanthomonadales    | Xanthomonadaceae    | Stenotrophomonas |
| 1177                     | 0   | 0  | 0   | 0   | Proteobacteria                                                | Betaproteobacteria    | Burkholderiales    | unclassified        | unclassified     |
| 1185                     | 0   | 2  | 0   | 0   | Proteobacteria                                                | Betaproteobacteria    | Burkholderiales    | Comamonadaceae      | Hydrogenophaga   |
| 1186                     | 0   | 0  | 0   | 1   | Proteobacteria                                                | Alphaproteobacteria   | Rhizobiales        | Bradyrhizobiaceae   | unclassified     |
| 1187                     | 0   | 1  | 0   | 0   | Proteobacteria                                                | Alphaproteobacteria   | Sphingomonadales   | Sphingomonadaceae   | Zymomonas        |
| 1189                     | 0   | 3  | 0   | 0   | Proteobacteria                                                | Alphaproteobacteria   | Sphingomonadales   | Sphingomonadaceae   | unclassified     |
| 1194                     | 0   | 31 | 0   | 0   | Proteobacteria                                                | Betaproteobacteria    | Nitrosomonadales   | Nitrosomonadaceae   | unclassified     |
| 1196                     | 0   | 0  | 1   | 0   | Proteobacteria                                                | Alphaproteobacteria   | Rhodospirillales   | Acetobacteraceae    | unclassified     |
| 1201                     | 0   | 0  | 0   | 3   | Proteobacteria                                                | Alphaproteobacteria   | Aurantimonadales   | Aurantimonadaceae   | unclassified     |
| 1206                     | 0   | 3  | 5   | 0   | Proteobacteria                                                | Gammaproteobacteria   | Xanthomonadales    | Xanthomonadaceae    | Lyso bacter      |
| 1208                     | 8   | 40 | 9   | 14  | Proteobacteria                                                | Alphaproteobacteria   | Rhodobacteriales   | Rhodobacteraceae    | Rubellimicrobium |
| 1212                     | 0   | 0  | 0   | 1   | Proteobacteria                                                | Gammaproteobacteria   | Xanthomonadales    | Xanthomonadaceae    | unclassified     |
| 1214                     | 1   | 0  | 1   | 0   | Proteobacteria                                                | Alphaproteobacteria   | Rhizobiales        | Beijerinckiacae     | unclassified     |
| 1226                     | 0   | 1  | 0   | 0   | Proteobacteria                                                | Alphaproteobacteria   | Sphingomonadales   | Sphingomonadaceae   | Sphingomonas     |
| 1228                     | 0   | 0  | 1   | 0   | Proteobacteria                                                | Alphaproteobacteria   | Rhizobiales        | unclassified        | unclassified     |
| 1232                     | 0   | 0  | 3   | 0   | Proteobacteria                                                | Alphaproteobacteria   | Rhodospirillales   | unclassified        | unclassified     |
| 1236                     | 0   | 1  | 0   | 0   | Proteobacteria                                                | Alphaproteobacteria   | Sphingomonadales   | Sphingomonadaceae   | unclassified     |
| 1248                     | 0   | 1  | 9   | 0   | Proteobacteria                                                | Deltaproteobacteria   | Mycococcales       | Nannocystaceae      | Nannocystis      |
| 1251                     | 1   | 2  | 2   | 6   | Proteobacteria                                                | Betaproteobacteria    | Burkholderiales    | Comamonadaceae      | Deftia           |

Table S5 (part II): OTUs, no. of reads and corresponding taxonomic affiliation of detected bacterial 16S rRNA amplicons by 454 pyrosequencing. Please note, the data shown here were either rank normalized or sum normalized (to 5000 reads per sample) before performing statistical analysis as depicted in the manuscript.

| Samples and no. of reads |    |     |     |     | taxonomic classification of bacterial 16S rRNA gene amplicons |                       |                   |                     |                   |
|--------------------------|----|-----|-----|-----|---------------------------------------------------------------|-----------------------|-------------------|---------------------|-------------------|
| URI                      | CO | CRS | CRS | CRS | phylum                                                        | class                 | order             | family              | genus             |
| 0                        | 1  | 0   | 0   | 0   | Proteobacteria                                                | Betaproteobacteria    | Burkholderiales   | Methylobacteriaceae | Methylobium       |
| 3                        | 3  | 8   | 3   | 3   | Proteobacteria                                                | Gammaproteobacteria   | Pseudomonadales   | Pseudomonadaceae    | Pseudomonas       |
| 1                        | 1  | 2   | 0   | 0   | Proteobacteria                                                | Gammaproteobacteria   | Pseudomonadales   | Pseudomonadaceae    | Pseudomonas       |
| 0                        | 3  | 0   | 0   | 0   | Proteobacteria                                                | Alphaproteobacteria   | Rhizobiales       | unclassified        | unclassified      |
| 0                        | 0  | 0   | 1   | 0   | Proteobacteria                                                | Alphaproteobacteria   | Rhodospirillales  | Rhodospirillaceae   | unclassified      |
| 0                        | 1  | 0   | 0   | 0   | Proteobacteria                                                | Alphaproteobacteria   | Rickettsiales     | Holospiraceae       | unclassified      |
| 0                        | 0  | 1   | 4   | 0   | Proteobacteria                                                | Alphaproteobacteria   | Rhizobiales       | Hyphomicrobiaceae   | Rhodoplanes       |
| 0                        | 4  | 0   | 2   | 0   | Proteobacteria                                                | Alphaproteobacteria   | Rhodobacteriales  | Rhodobacteraceae    | Rubellimicrobium  |
| 0                        | 1  | 0   | 0   | 0   | Proteobacteria                                                | Betaproteobacteria    | Burkholderiales   | Comamonadaceae      | unclassified      |
| 0                        | 1  | 0   | 0   | 0   | Proteobacteria                                                | Alphaproteobacteria   | Rhizobiales       | unclassified        | unclassified      |
| 0                        | 0  | 1   | 0   | 0   | Proteobacteria                                                | Alphaproteobacteria   | Rhodospirillales  | Acetobacteraceae    | Roseomonas        |
| 1                        | 5  | 3   | 4   | 0   | Proteobacteria                                                | Gammaproteobacteria   | Xanthomonadales   | Xanthomonadaceae    | Thermomonas       |
| 0                        | 0  | 0   | 0   | 0   | Proteobacteria                                                | Gammaproteobacteria   | Xanthomonadales   | Xanthomonadaceae    | Pseudoxanthomonas |
| 0                        | 0  | 2   | 0   | 0   | Proteobacteria                                                | Betaproteobacteria    | Neisseriales      | Neisseriaceae       | unclassified      |
| 0                        | 1  | 0   | 0   | 0   | Proteobacteria                                                | Alphaproteobacteria   | Rhodobacteriales  | Rhodobacteraceae    | unclassified      |
| 0                        | 8  | 8   | 6   | 0   | Proteobacteria                                                | Gammaproteobacteria   | Enterobacteriales | Enterobacteriaceae  | Pantoea           |
| 0                        | 1  | 0   | 0   | 0   | Proteobacteria                                                | Alphaproteobacteria   | Rhodobacteriales  | Rhodobacteraceae    | unclassified      |
| 0                        | 1  | 0   | 0   | 0   | Proteobacteria                                                | Alphaproteobacteria   | Rhizobiales       | Hyphomicrobiaceae   | Devosia           |
| 0                        | 32 | 0   | 0   | 0   | Proteobacteria                                                | Alphaproteobacteria   | Rhodobacteriales  | Rhodobacteraceae    | unclassified      |
| 0                        | 0  | 1   | 0   | 0   | Proteobacteria                                                | Alphaproteobacteria   | Sphingomonadales  | Sphingomonadaceae   | Kaistobacter      |
| 0                        | 0  | 1   | 0   | 0   | Proteobacteria                                                | unclassified          | unclassified      | unclassified        | unclassified      |
| 0                        | 1  | 0   | 0   | 0   | Proteobacteria                                                | Alphaproteobacteria   | Rhizobiales       | Hyphomicrobiaceae   | Devosia           |
| 0                        | 1  | 0   | 0   | 0   | Proteobacteria                                                | Betaproteobacteria    | Burkholderiales   | Comamonadaceae      | unclassified      |
| 0                        | 1  | 0   | 0   | 0   | Proteobacteria                                                | Alphaproteobacteria   | Rhodospirillales  | Acetobacteraceae    | unclassified      |
| 0                        | 0  | 0   | 2   | 0   | Proteobacteria                                                | Alphaproteobacteria   | Caulobacterales   | Caulobacteraceae    | unclassified      |
| 0                        | 0  | 0   | 1   | 0   | Proteobacteria                                                | Alphaproteobacteria   | Rhizobiales       | Rhodobiaceae        | unclassified      |
| 0                        | 0  | 1   | 0   | 0   | Proteobacteria                                                | Alphaproteobacteria   | Rhodospirillales  | Rhodospirillaceae   | unclassified      |
| 0                        | 1  | 0   | 0   | 0   | Proteobacteria                                                | Alphaproteobacteria   | Rhizobiales       | Aurantimonadaceae   | unclassified      |
| 1                        | 1  | 0   | 3   | 0   | Proteobacteria                                                | Alphaproteobacteria   | Rhodobacteriales  | Rhodobacteraceae    | Rubellimicrobium  |
| 0                        | 0  | 2   | 0   | 0   | Proteobacteria                                                | Alphaproteobacteria   | Sphingomonadales  | unclassified        | unclassified      |
| 2                        | 0  | 0   | 0   | 0   | Proteobacteria                                                | Alphaproteobacteria   | Rhodobacteriales  | Rhodobacteraceae    | Amarilcoccus      |
| 0                        | 0  | 3   | 0   | 0   | Proteobacteria                                                | Alphaproteobacteria   | Rhodospirillales  | Acetobacteraceae    | Roseomonas        |
| 0                        | 0  | 0   | 1   | 0   | Proteobacteria                                                | Gammaproteobacteria   | unclassified      | unclassified        | unclassified      |
| 0                        | 0  | 0   | 0   | 0   | Proteobacteria                                                | Alphaproteobacteria   | Rhizobiales       | Methylobacteriaceae | Methylobacterium  |
| 3                        | 0  | 0   | 0   | 0   | Proteobacteria                                                | Gammaproteobacteria   | Pseudomonadales   | Pseudomonadaceae    | Pseudomonas       |
| 1                        | 3  | 3   | 2   | 0   | Proteobacteria                                                | Alphaproteobacteria   | Caulobacterales   | Caulobacteraceae    | Phenyllobacterium |
| 0                        | 0  | 1   | 1   | 0   | Proteobacteria                                                | Alphaproteobacteria   | Rhizobiales       | Phyllobacteriaceae  | Mesorhizobium     |
| 0                        | 0  | 1   | 0   | 0   | Proteobacteria                                                | Deltaproteobacteria   | Mycococcales      | Cystobacteraceae    | unclassified      |
| 0                        | 0  | 1   | 0   | 0   | Proteobacteria                                                | Alphaproteobacteria   | Rhodospirillales  | Rhodospirillaceae   | Magnetospirillum  |
| 0                        | 0  | 1   | 0   | 0   | Proteobacteria                                                | Alphaproteobacteria   | Sphingomonadales  | Sphingomonadaceae   | Sphingomonas      |
| 0                        | 0  | 1   | 0   | 0   | Proteobacteria                                                | Gammaproteobacteria   | Xanthomonadales   | Xanthomonadaceae    | Pseudoxanthomonas |
| 0                        | 0  | 0   | 0   | 0   | Proteobacteria                                                | Gammaproteobacteria   | Moraxellales      | Moraxellaceae       | Acinetobacter     |
| 0                        | 1  | 0   | 0   | 0   | Proteobacteria                                                | Gammaproteobacteria   | Pseudomonadales   | Moraxellaceae       | Alkanindiges      |
| 1                        | 0  | 0   | 0   | 0   | Proteobacteria                                                | Alphaproteobacteria   | Rhizobiales       | Rhizobiaceae        | unclassified      |
| 5                        | 0  | 0   | 1   | 0   | Proteobacteria                                                | Alphaproteobacteria   | Rhodobacteriales  | Rhodobacteraceae    | Rubellimicrobium  |
| 0                        | 1  | 0   | 0   | 0   | Proteobacteria                                                | Deltaproteobacteria   | Mycococcales      | unclassified        | unclassified      |
| 0                        | 3  | 0   | 0   | 0   | Proteobacteria                                                | Alphaproteobacteria   | Rhizobiales       | Beijerinckiaceae    | unclassified      |
| 0                        | 0  | 1   | 0   | 0   | Proteobacteria                                                | Alphaproteobacteria   | Rhodospirillales  | Rhodobacteraceae    | Rubellimicrobium  |
| 0                        | 0  | 1   | 0   | 0   | Proteobacteria                                                | Alphaproteobacteria   | Rhodobacteriales  | Rhodobacteraceae    | Rubellimicrobium  |
| 0                        | 23 | 0   | 0   | 0   | Proteobacteria                                                | Betaproteobacteria    | Burkholderiales   | Comamonadaceae      | Simplicispira     |
| 0                        | 4  | 0   | 0   | 0   | Proteobacteria                                                | Alphaproteobacteria   | Rhodospirillales  | Rhodospirillaceae   | unclassified      |
| 0                        | 1  | 0   | 0   | 0   | Proteobacteria                                                | Alphaproteobacteria   | Sphingomonadales  | unclassified        | unclassified      |
| 2                        | 0  | 2   | 1   | 0   | Proteobacteria                                                | Gammaproteobacteria   | Xanthomonadales   | Xanthomonadaceae    | unclassified      |
| 0                        | 1  | 0   | 3   | 0   | Proteobacteria                                                | Alphaproteobacteria   | Rhizobiales       | Hyphomicrobiaceae   | Devosia           |
| 0                        | 1  | 1   | 0   | 0   | Proteobacteria                                                | Alphaproteobacteria   | Rhodospirillales  | unclassified        | unclassified      |
| 0                        | 6  | 0   | 4   | 0   | Proteobacteria                                                | Alphaproteobacteria   | Caulobacterales   | Caulobacteraceae    | unclassified      |
| 1                        | 18 | 2   | 1   | 0   | Proteobacteria                                                | Gammaproteobacteria   | Xanthomonadales   | Xanthomonadaceae    | Thermomonas       |
| 0                        | 0  | 0   | 1   | 0   | Proteobacteria                                                | Betaproteobacteria    | Rhodocyclales     | unclassified        | unclassified      |
| 0                        | 1  | 0   | 0   | 0   | Proteobacteria                                                | Alphaproteobacteria   | Rhizobiales       | Hyphomicrobiaceae   | unclassified      |
| 0                        | 0  | 1   | 0   | 0   | Proteobacteria                                                | Deltaproteobacteria   | Mycococcales      | unclassified        | unclassified      |
| 0                        | 1  | 0   | 0   | 0   | Proteobacteria                                                | Betaproteobacteria    | Neisseriales      | Neisseriaceae       | Chromobacterium   |
| 0                        | 3  | 0   | 0   | 0   | Proteobacteria                                                | Alphaproteobacteria   | Rhodobacteriales  | Rhodobacteraceae    | unclassified      |
| 0                        | 0  | 0   | 0   | 0   | Proteobacteria                                                | Betaproteobacteria    | Neisseriales      | Neisseriaceae       | Streptobacter     |
| 0                        | 0  | 0   | 1   | 0   | Proteobacteria                                                | Epsilonproteobacteria | Campylobacterales | Campylobacteraceae  | Campylobacter     |
| 0                        | 0  | 1   | 0   | 0   | Proteobacteria                                                | Alphaproteobacteria   | Sphingomonadales  | unclassified        | unclassified      |
| 0                        | 1  | 2   | 0   | 0   | Proteobacteria                                                | Gammaproteobacteria   | Xanthomonadales   | Xanthomonadaceae    | Dokdonella        |
| 0                        | 1  | 0   | 0   | 0   | Proteobacteria                                                | Alphaproteobacteria   | Sphingomonadales  | Erythrobacteraceae  | unclassified      |
| 8                        | 3  | 2   | 2   | 0   | Proteobacteria                                                | Gammaproteobacteria   | Pseudomonadales   | Moraxellaceae       | Acinetobacter     |
| 0                        | 1  | 7   | 0   | 0   | Proteobacteria                                                | Alphaproteobacteria   | Rhizobiales       | unclassified        | unclassified      |
| 0                        | 1  | 7   | 0   | 0   | Proteobacteria                                                | Alphaproteobacteria   | Rhodobacteriales  | Rhodobacteraceae    | Rubellimicrobium  |
| 0                        | 1  | 0   | 0   | 0   | Proteobacteria                                                | Gammaproteobacteria   | Legionellales     | Legionellaceae      | unclassified      |
| 0                        | 0  | 4   | 0   | 0   | Proteobacteria                                                | Alphaproteobacteria   | Rhizobiales       | Hyphomicrobiaceae   | Rhodoplanes       |
| 0                        | 1  | 0   | 1   | 0   | Proteobacteria                                                | Alphaproteobacteria   | Rhizobiales       | Phyllobacteriaceae  | Mesorhizobium     |
| 0                        | 3  | 13  | 3   | 0   | Proteobacteria                                                | Alphaproteobacteria   | Rhodospirillales  | Acetobacteraceae    | unclassified      |
| 0                        | 3  | 0   | 0   | 0   | Proteobacteria                                                | Alphaproteobacteria   | Rhodospirillales  | Acetobacteraceae    | unclassified      |
| 0                        | 3  | 4   | 2   | 0   | Proteobacteria                                                | Alphaproteobacteria   | Rhodobacteriales  | Rhodobacteraceae    | Rubellimicrobium  |
| 0                        | 1  | 0   | 0   | 0   | Proteobacteria                                                | Alphaproteobacteria   | Rhodobacteriales  | Rhodobacteraceae    | unclassified      |
| 1                        | 2  | 1   | 0   | 0   | Proteobacteria                                                | Alphaproteobacteria   | Rhizobiales       | Bradyrhizobiaceae   | unclassified      |
| 0                        | 1  | 0   | 0   | 0   | Proteobacteria                                                | Alphaproteobacteria   | Rhodospirillales  | Acetobacteraceae    | Roseomonas        |
| 0                        | 1  | 0   | 0   | 0   | Proteobacteria                                                | unclassified          | unclassified      | unclassified        | unclassified      |
| 0                        | 1  | 0   | 0   | 0   | Proteobacteria                                                | Betaproteobacteria    | Burkholderiales   | Comamonadaceae      | Hydrogenophaga    |
| 0                        | 0  | 0   | 2   | 0   | Proteobacteria                                                | Alphaproteobacteria   | Rhodospirillales  | Acetobacteraceae    | unclassified      |
| 0                        | 1  | 0   | 0   | 0   | Proteobacteria                                                | Alphaproteobacteria   | Rhizobiales       | Hyphomicrobiaceae   | Rhodoplanes       |
| 0                        | 0  | 4   | 1   | 0   | Proteobacteria                                                | Alphaproteobacteria   | Rhodospirillales  | Acetobacteraceae    | unclassified      |
| 2                        | 0  | 0   | 1   | 0   | Proteobacteria                                                | Gammaproteobacteria   | Enterobacteriales | Enterobacteriaceae  | Ewingella         |
| 0                        | 0  | 0   | 1   | 0   | Proteobacteria                                                | Gammaproteobacteria   | Enterobacteriales | Enterobacteriaceae  | unclassified      |
| 0                        | 1  | 0   | 0   | 0   | Proteobacteria                                                | Alphaproteobacteria   | Sphingomonadales  | Sphingomonadaceae   | Sphingomonas      |
| 0                        | 0  | 0   | 1   | 0   | Proteobacteria                                                | Gammaproteobacteria   | Pseudomonadales   | Pseudomonadaceae    | Pseudomonas       |
| 0                        | 17 | 0   | 0   | 0   | Proteobacteria                                                | Alphaproteobacteria   | Rhodobacteriales  | Rhodobacteraceae    | unclassified      |
| 0                        | 1  | 0   | 0   | 0   | Proteobacteria                                                | Alphaproteobacteria   | Rhizobiales       | Nordellaaceae       | Nordella          |
| 0                        | 0  | 0   | 4   | 0   | Proteobacteria                                                | Alphaproteobacteria   | Rhodospirillales  | Acetobacteraceae    | Roseomonas        |
| 0                        | 0  | 3   | 0   | 0   | Proteobacteria                                                | Gammaproteobacteria   | Oceanospirillales | 211d20              | unclassified      |
| 0                        | 1  | 0   | 0   | 0   | Proteobacteria                                                | Alphaproteobacteria   | Rhodobacteriales  | Rhodobacteraceae    | unclassified      |
| 0                        | 2  | 2   | 3   | 0   | Proteobacteria                                                | Alphaproteobacteria   | Rhodospirillales  | Acetobacteraceae    | unclassified      |
| 0                        | 1  | 0   | 0   | 0   | Proteobacteria                                                | Gammaproteobacteria   | Xanthomonadales   | Xanthomonadaceae    | unclassified      |
| 0                        | 2  | 6   | 0   | 0   | Proteobacteria                                                | Alphaproteobacteria   | Rhodospirillales  | Acetobacteraceae    | Roseomonas        |
| 2                        | 14 | 29  | 7   | 0   | Proteobacteria                                                | Alphaproteobacteria   | Rhizobiales       | Methylobacteriaceae | Methylobacterium  |
| 0                        | 0  | 0   | 12  | 0   | Proteobacteria                                                | Deltaproteobacteria   | Mycococcales      | Hydrogenophagaceae  | unclassified      |
| 0                        | 0  | 0   | 0   | 0   | Proteobacteria                                                | Alphaproteobacteria   | Sphingomonadales  | Erythrobacteraceae  | unclassified      |
| 0                        | 2  | 0   | 3   | 0   | Proteobacteria                                                | Alphaproteobacteria   | Rickettsiales     | Rickettsiaceae      | Rickettsia        |

Table S5 (part O): OTUs, no. of reads and corresponding taxonomic affiliation of detected bacterial 16S rRNA amplicons by 454 pyrotag sequencing. Please note, the data shown here was either rank normalized or sum normalized (to 5000 reads per sample) before performing statistical analysis as depicted in the manuscript.

| Samples and no. of reads |    |    |     |     | taxonomic classification of bacterial 16S rRNA gene amplicons |                     |                    |                     |                  |
|--------------------------|----|----|-----|-----|---------------------------------------------------------------|---------------------|--------------------|---------------------|------------------|
| OTU                      | UR | CO | CR8 | CR5 | phylum                                                        | class               | order              | family              | genus            |
| 1621                     | 0  | 0  | 1   | 0   | Proteobacteria                                                | Gammaproteobacteria | Xanthomonadales    | Xanthomonadaceae    | unclassified     |
| 1624                     | 0  | 5  | 2   | 3   | Proteobacteria                                                | Betaproteobacteria  | Burkholderiales    | Burkholderiaceae    | unclassified     |
| 1627                     | 0  | 1  | 0   | 0   | Proteobacteria                                                | Alphaproteobacteria | Rhizobiales        | Hyphomicrobiaceae   | Devosia          |
| 1633                     | 0  | 0  | 2   | 0   | Proteobacteria                                                | unclassified        | unclassified       | unclassified        | unclassified     |
| 1637                     | 2  | 5  | 4   | 12  | Proteobacteria                                                | Alphaproteobacteria | Sphingomonadales   | Sphingomonadaceae   | Sphingomonas     |
| 1639                     | 2  | 1  | 1   | 1   | Proteobacteria                                                | Betaproteobacteria  | Neisseriales       | Neisseriaceae       | Neisseria        |
| 1640                     | 0  | 0  | 0   | 2   | Proteobacteria                                                | Alphaproteobacteria | Rhodobacterales    | Rhodobacteraceae    | Amaricoccus      |
| 1641                     | 0  | 0  | 0   | 1   | Proteobacteria                                                | Gammaproteobacteria | Xanthomonadales    | Xanthomonadaceae    | unclassified     |
| 1643                     | 15 | 6  | 11  | 7   | Proteobacteria                                                | Gammaproteobacteria | Pseudomonadales    | Moraxellaceae       | Enhydrobacter    |
| 1646                     | 0  | 0  | 2   | 1   | Proteobacteria                                                | Alphaproteobacteria | Caulobacterales    | Caulobacteraceae    | Caulobacter      |
| 1647                     | 0  | 1  | 0   | 0   | Proteobacteria                                                | unclassified        | unclassified       | unclassified        | unclassified     |
| 1648                     | 0  | 2  | 0   | 0   | Proteobacteria                                                | Betaproteobacteria  | Burkholderiales    | Alcaligenaceae      | Alcaligenes      |
| 1654                     | 0  | 3  | 2   | 0   | Proteobacteria                                                | Alphaproteobacteria | Rhizobiales        | Bradyrhizobiaceae   | unclassified     |
| 1655                     | 0  | 1  | 0   | 1   | Proteobacteria                                                | Alphaproteobacteria | Rhizobiales        | unclassified        | unclassified     |
| 1661                     | 30 | 1  | 14  | 6   | Proteobacteria                                                | Gammaproteobacteria | Xanthomonadales    | Xanthomonadaceae    | Stenotrophomonas |
| 1662                     | 0  | 0  | 2   | 0   | Proteobacteria                                                | Alphaproteobacteria | Sphingomonadales   | Sphingomonadaceae   | unclassified     |
| 1666                     | 0  | 6  | 0   | 0   | Proteobacteria                                                | Betaproteobacteria  | Burkholderiales    | Burkholderiaceae    | unclassified     |
| 1667                     | 0  | 1  | 0   | 0   | Proteobacteria                                                | Alphaproteobacteria | Sphingomonadales   | Sphingomonadaceae   | Sphingobium      |
| 1673                     | 1  | 0  | 0   | 0   | Proteobacteria                                                | Gammaproteobacteria | unclassified       | unclassified        | unclassified     |
| 1674                     | 0  | 0  | 0   | 1   | Proteobacteria                                                | Gammaproteobacteria | Pasteurellales     | Pasteurellaceae     | Haemophilus      |
| 1675                     | 0  | 2  | 1   | 0   | Proteobacteria                                                | Alphaproteobacteria | Rhizobiales        | unclassified        | unclassified     |
| 1679                     | 0  | 0  | 1   | 1   | Proteobacteria                                                | Gammaproteobacteria | Aeromonadales      | Aeromonadaceae      | Aeromonas        |
| 1682                     | 0  | 0  | 2   | 0   | Proteobacteria                                                | Alphaproteobacteria | Rhizobiales        | Methylobacteriaceae | Methylobacterium |
| 1683                     | 0  | 0  | 1   | 0   | Proteobacteria                                                | Alphaproteobacteria | Rhodobacterales    | Rhodobacteraceae    | unclassified     |
| 1690                     | 3  | 17 | 9   | 9   | Proteobacteria                                                | Alphaproteobacteria | Sphingomonadales   | unclassified        | unclassified     |
| 1692                     | 0  | 1  | 0   | 0   | Proteobacteria                                                | Alphaproteobacteria | Sphingomonadales   | unclassified        | unclassified     |
| 1695                     | 0  | 1  | 0   | 0   | Proteobacteria                                                | Alphaproteobacteria | unclassified       | unclassified        | unclassified     |
| 1702                     | 2  | 2  | 0   | 1   | Proteobacteria                                                | Alphaproteobacteria | Sphingomonadales   | Sphingomonadaceae   | Sphingomonas     |
| 1703                     | 5  | 0  | 2   | 0   | Proteobacteria                                                | Alphaproteobacteria | Sphingomonadales   | Sphingomonadaceae   | Sphingobium      |
| 1712                     | 0  | 2  | 0   | 0   | Proteobacteria                                                | Alphaproteobacteria | Sphingomonadales   | Sphingomonadaceae   | Zymomonas        |
| 1713                     | 0  | 6  | 0   | 1   | Proteobacteria                                                | Alphaproteobacteria | Sphingomonadales   | Erythrobacteraceae  | unclassified     |
| 1714                     | 0  | 2  | 0   | 0   | Proteobacteria                                                | Alphaproteobacteria | Sphingomonadales   | Sphingomonadaceae   | unclassified     |
| 1715                     | 1  | 1  | 0   | 2   | Proteobacteria                                                | Betaproteobacteria  | Neisseriales       | Neisseriaceae       | Neisseria        |
| 1716                     | 0  | 2  | 1   | 4   | Proteobacteria                                                | Alphaproteobacteria | Rhodobacterales    | Rhodobacteraceae    | Rubellimicrobium |
| 1718                     | 1  | 3  | 7   | 0   | Proteobacteria                                                | Alphaproteobacteria | Rhizobiales        | Phyllobacteriaceae  | Mesorhizobium    |
| 1719                     | 0  | 0  | 2   | 0   | Proteobacteria                                                | Gammaproteobacteria | Legionellales      | Coxiellaceae        | unclassified     |
| 339                      | 0  | 2  | 0   | 0   | SC4                                                           | unclassified        | unclassified       | unclassified        | unclassified     |
| 536                      | 0  | 3  | 1   | 0   | SC4                                                           | unclassified        | unclassified       | unclassified        | unclassified     |
| 565                      | 0  | 7  | 0   | 4   | SC4                                                           | unclassified        | unclassified       | unclassified        | unclassified     |
| 626                      | 1  | 0  | 0   | 0   | SC4                                                           | unclassified        | unclassified       | unclassified        | unclassified     |
| 1015                     | 0  | 2  | 0   | 0   | SC4                                                           | unclassified        | unclassified       | unclassified        | unclassified     |
| 1133                     | 1  | 0  | 0   | 0   | SC4                                                           | unclassified        | unclassified       | unclassified        | unclassified     |
| 1328                     | 0  | 1  | 0   | 0   | SC4                                                           | unclassified        | unclassified       | unclassified        | unclassified     |
| 322                      | 2  | 0  | 0   | 0   | Spirochaetes                                                  | Spirochaetes        | Spirochaetales     | Spirochaetaceae     | Treponema        |
| 483                      | 0  | 0  | 2   | 0   | Tenericutes                                                   | Erysipelotrichi     | Erysipelotrichales | Erysipelotrichaceae | ATCC_27806       |
| 130                      | 0  | 5  | 0   | 3   | Thermi                                                        | Deinococci          | Deinococcales      | Deinococcaceae      | Deinococcus      |
| 189                      | 1  | 27 | 4   | 14  | Thermi                                                        | Deinococci          | Deinococcales      | Deinococcaceae      | Deinococcus      |
| 433                      | 0  | 7  | 3   | 2   | Thermi                                                        | Deinococci          | Deinococcales      | Deinococcaceae      | Deinococcus      |
| 613                      | 0  | 1  | 0   | 0   | Thermi                                                        | Deinococci          | Deinococcales      | Deinococcaceae      | Deinococcus      |
| 746                      | 0  | 1  | 0   | 0   | Thermi                                                        | Deinococci          | Deinococcales      | Deinococcaceae      | Deinococcus      |
| 758                      | 0  | 21 | 0   | 0   | Thermi                                                        | Deinococci          | Deinococcales      | Deinococcaceae      | Deinococcus      |
| 995                      | 0  | 1  | 0   | 0   | Thermi                                                        | Deinococci          | Deinococcales      | Deinococcaceae      | Deinococcus      |
| 1191                     | 0  | 3  | 0   | 2   | Thermi                                                        | Deinococci          | Deinococcales      | Deinococcaceae      | Deinococcus      |
| 1197                     | 0  | 1  | 0   | 0   | Thermi                                                        | Deinococci          | Deinococcales      | Deinococcaceae      | Deinococcus      |
| 1220                     | 0  | 0  | 0   | 2   | Thermi                                                        | Deinococci          | Deinococcales      | Deinococcaceae      | Deinococcus      |
| 1449                     | 0  | 5  | 1   | 0   | Thermi                                                        | Deinococci          | Deinococcales      | Deinococcaceae      | Deinococcus      |
| 1461                     | 0  | 2  | 0   | 1   | Thermi                                                        | Deinococci          | Deinococcales      | Deinococcaceae      | Deinococcus      |
| 1527                     | 0  | 1  | 1   | 0   | Thermi                                                        | Deinococci          | Deinococcales      | Deinococcaceae      | Deinococcus      |
| 1623                     | 0  | 2  | 0   | 0   | Thermi                                                        | Deinococci          | Deinococcales      | Deinococcaceae      | Deinococcus      |
| 1670                     | 0  | 1  | 0   | 1   | Thermi                                                        | Deinococci          | Deinococcales      | Deinococcaceae      | Deinococcus      |
| 756                      | 0  | 0  | 0   | 1   | TM6                                                           | SJA-4               | unclassified       | unclassified        | unclassified     |
| 68                       | 0  | 0  | 0   | 1   | unclassified                                                  | unclassified        | unclassified       | unclassified        | unclassified     |
| 71                       | 0  | 0  | 0   | 3   | unclassified                                                  | unclassified        | unclassified       | unclassified        | unclassified     |
| 143                      | 0  | 0  | 1   | 0   | unclassified                                                  | unclassified        | unclassified       | unclassified        | unclassified     |
| 157                      | 0  | 0  | 3   | 0   | unclassified                                                  | unclassified        | unclassified       | unclassified        | unclassified     |
| 178                      | 0  | 1  | 0   | 0   | unclassified                                                  | unclassified        | unclassified       | unclassified        | unclassified     |
| 290                      | 0  | 0  | 1   | 0   | unclassified                                                  | unclassified        | unclassified       | unclassified        | unclassified     |
| 498                      | 0  | 1  | 0   | 0   | unclassified                                                  | unclassified        | unclassified       | unclassified        | unclassified     |
| 525                      | 0  | 1  | 0   | 0   | unclassified                                                  | unclassified        | unclassified       | unclassified        | unclassified     |
| 548                      | 0  | 2  | 0   | 2   | unclassified                                                  | unclassified        | unclassified       | unclassified        | unclassified     |
| 567                      | 0  | 1  | 0   | 0   | unclassified                                                  | unclassified        | unclassified       | unclassified        | unclassified     |
| 994                      | 0  | 2  | 0   | 0   | unclassified                                                  | unclassified        | unclassified       | unclassified        | unclassified     |
| 906                      | 0  | 1  | 0   | 0   | unclassified                                                  | unclassified        | unclassified       | unclassified        | unclassified     |
| 996                      | 0  | 0  | 2   | 0   | unclassified                                                  | unclassified        | unclassified       | unclassified        | unclassified     |
| 1021                     | 0  | 1  | 0   | 1   | unclassified                                                  | unclassified        | unclassified       | unclassified        | unclassified     |
| 1057                     | 0  | 0  | 0   | 1   | unclassified                                                  | unclassified        | unclassified       | unclassified        | unclassified     |
| 1132                     | 0  | 1  | 0   | 0   | unclassified                                                  | unclassified        | unclassified       | unclassified        | unclassified     |
| 1148                     | 0  | 1  | 1   | 0   | unclassified                                                  | unclassified        | unclassified       | unclassified        | unclassified     |
| 1174                     | 1  | 0  | 0   | 0   | unclassified                                                  | unclassified        | unclassified       | unclassified        | unclassified     |
| 1370                     | 0  | 1  | 0   | 0   | unclassified                                                  | unclassified        | unclassified       | unclassified        | unclassified     |
| 1474                     | 0  | 2  | 0   | 0   | unclassified                                                  | unclassified        | unclassified       | unclassified        | unclassified     |
| 1512                     | 0  | 1  | 0   | 0   | unclassified                                                  | unclassified        | unclassified       | unclassified        | unclassified     |
| 1514                     | 1  | 1  | 0   | 0   | unclassified                                                  | unclassified        | unclassified       | unclassified        | unclassified     |
| 317                      | 0  | 1  | 0   | 0   | Verrucomicrobia                                               | Verrucomicrobiae    | Verrucomicrobiales | Verrucomicrobiaceae | Luteolibacter    |
| 663                      | 0  | 1  | 0   | 0   | Verrucomicrobia                                               | Verrucomicrobiae    | Verrucomicrobiales | unclassified        | unclassified     |
| 1240                     | 0  | 2  | 0   | 0   | Verrucomicrobia                                               | Verrucomicrobiae    | Verrucomicrobiales | unclassified        | unclassified     |
| 1306                     | 0  | 0  | 0   | 1   | WPS-2                                                         | unclassified        | unclassified       | unclassified        | unclassified     |

Table S6 (part A): HybScores of OTUs that were called present in at least one of the samples. Taxonomic classifications are based on PhyloChip taxonomy (derived from GreenGenes). Please note, that data presented here was rank normalized before performing statistical analyses presented in the manuscript.

| OTU   | Sample ID (PMA) |        |        |         | Sample ID |       |       |       | taxonomic classification of representative rOTU cluster |          |                |                   |                    |  |  | genus            | species                     |
|-------|-----------------|--------|--------|---------|-----------|-------|-------|-------|---------------------------------------------------------|----------|----------------|-------------------|--------------------|--|--|------------------|-----------------------------|
|       | UR_PMA          | CD_PMA | CR_PMA | CRS_PMA | UR        | CD    | CR    | CRS   | kingdom                                                 | phylum   | class          | order             | family             |  |  |                  |                             |
| 51048 | 11074           |        | 9537   | 7473    | 7676      | 12119 | 12905 | 11946 | 12182                                                   | Bacteria | Acidobacteria  | Acidobacteriales  | Acidobacteriaceae  |  |  | unclassified     | unclassified                |
| 51676 | 9105            | 9538   |        | 8885    | 8077      | 12423 | 13335 | 13082 | 12945                                                   | Bacteria | Acidobacteria  | Acidobacteriales  | Acidobacteriaceae  |  |  | unclassified     | unclassified                |
| 58588 | 8247            | 8294   |        | 7605    | 7117      | 10952 | 12084 | 11550 | 12352                                                   | Bacteria | Acidobacteria  | Acidobacteriales  | Acidobacteriaceae  |  |  | unclassified     | unclassified                |
| 51431 | 8664            | 11058  |        | 7198    | 7362      | 10498 | 12040 | 11381 | 11562                                                   | Bacteria | Acidobacteria  | BP_C102           | unclassified       |  |  | sIF              | unclassified                |
| 41119 | 9984            | 9813   |        | 9028    | 8571      | 11446 | 12431 | 11719 | 11968                                                   | Bacteria | Actinobacteria | Actinobacteriales | Actinobacteriaceae |  |  | 0319-7134        | unclassified                |
| 41305 | 8548            | 9407   |        | 8024    | 7271      | 12209 | 13139 | 12291 | 12637                                                   | Bacteria | Actinobacteria | Actinobacteriales | Actinobacteriaceae |  |  | 0319-7114        | unclassified                |
| 42582 | 8870            | 8815   |        | 6768    | 7747      | 11632 | 12518 | 11794 | 12400                                                   | Bacteria | Actinobacteria | Actinobacteriales | Acidimicrobiales   |  |  | unclassified     | unclassified                |
| 42676 | 10082           | 11138  |        | 10157   | 9552      | 12768 | 13557 | 13089 | 13113                                                   | Bacteria | Actinobacteria | Actinobacteriales | Acidimicrobiales   |  |  | unclassified     | unclassified                |
| 42818 | 10167           | 11183  |        | 9558    | 8888      | 12932 | 13801 | 13205 | 13240                                                   | Bacteria | Actinobacteria | Actinobacteriales | Acidimicrobiales   |  |  | unclassified     | unclassified                |
| 42997 | 9160            | 9210   |        | 6608    | 7664      | 11848 | 12404 | 11648 | 11608                                                   | Bacteria | Actinobacteria | Actinobacteriales | Acidimicrobiales   |  |  | unclassified     | unclassified                |
| 43027 | 9217            | 9087   |        | 6794    | 7802      | 11052 | 12129 | 11092 | 11774                                                   | Bacteria | Actinobacteria | Actinobacteriales | Acidimicrobiales   |  |  | unclassified     | unclassified                |
| 44151 | 8746            | 9065   |        | 6076    | 6582      | 12048 | 12976 | 12452 | 12463                                                   | Bacteria | Actinobacteria | Actinobacteriales | Acidimicrobiales   |  |  | unclassified     | unclassified                |
| 44262 | 8664            | 9836   |        | 6081    | 7187      | 11634 | 12211 | 12064 | 11875                                                   | Bacteria | Actinobacteria | Actinobacteriales | Acidimicrobiales   |  |  | AKW874           | unclassified                |
| 42505 | 8724            | 7349   |        | 6302    | 6803      | 11460 | 12750 | 11563 | 11448                                                   | Bacteria | Actinobacteria | Actinobacteriales | Acidimicrobiales   |  |  | CL500-29         | unclassified                |
| 42479 | 9891            | 9898   |        | 8323    | 7478      | 12610 | 13126 | 12218 | 12754                                                   | Bacteria | Actinobacteria | Actinobacteriales | Acidimicrobiales   |  |  | EB1017           | unclassified                |
| 42497 | 9314            | 8853   |        | 6689    | 7591      | 11849 | 12442 | 11753 | 12259                                                   | Bacteria | Actinobacteria | Actinobacteriales | Acidimicrobiales   |  |  | EB1017           | unclassified                |
| 42999 | 9438            | 10753  |        | 5703    | 6154      | 12747 | 13637 | 13062 | 13063                                                   | Bacteria | Actinobacteria | Actinobacteriales | Acidimicrobiales   |  |  | EB1017           | unclassified                |
| 43227 | 9437            | 9593   |        | 8323    | 7922      | 12432 | 12798 | 12604 | 12399                                                   | Bacteria | Actinobacteria | Actinobacteriales | Acidimicrobiales   |  |  | Microthrixaceae  | unclassified                |
| 40921 | 8773            | 9084   |        | 7243    | 6544      | 12056 | 12976 | 12453 | 12463                                                   | Bacteria | Actinobacteria | Actinobacteriales | Actinomycetales    |  |  | ACC-M1           | unclassified                |
| 41644 | 9491            | 9625   |        | 7421    | 8357      | 12104 | 11639 | 11679 | 11878                                                   | Bacteria | Actinobacteria | Actinomycetales   | Actinomycetaceae   |  |  | Actinomycetes    | Actinomycetes oris          |
| 40286 | 9279            | 9772   |        | 7326    | 8325      | 12002 | 11710 | 12091 | 12078                                                   | Bacteria | Actinobacteria | Actinomycetales   | Actinomycetaceae   |  |  | Actinomycetes    | Actinomycetes oris          |
| 40334 | 9764            | 9699   |        | 8250    | 8768      | 12126 | 12535 | 12362 | 12826                                                   | Bacteria | Actinobacteria | Actinomycetales   | Actinomycetaceae   |  |  | Actinomycetes    | Actinomycetes oris          |
| 40651 | 8960            | 7950   |        | 7649    | 8314      | 11540 | 11376 | 11917 | 11156                                                   | Bacteria | Actinobacteria | Actinomycetales   | Actinomycetaceae   |  |  | Actinomycetes    | Actinomycetes oris          |
| 40779 | 10193           | 9968   |        | 7661    | 8474      | 12720 | 12515 | 12727 | 12842                                                   | Bacteria | Actinobacteria | Actinomycetales   | Actinomycetaceae   |  |  | Actinomycetes    | Actinomycetes oris          |
| 39415 | 8376            | 8299   |        | 6249    | 7222      | 11262 | 12768 | 12279 | 12454                                                   | Bacteria | Actinobacteria | Actinomycetales   | Actinomycetaceae   |  |  | Actinomycetes    | Actinomycetes oris          |
| 39607 | 9396            | 10711  |        | 8133    | 7173      | 12624 | 13024 | 12548 | 13020                                                   | Bacteria | Actinobacteria | Actinomycetales   | Actinomycetaceae   |  |  | Actinomycetes    | unclassified                |
| 40407 | 9409            | 8817   |        | 8061    | 8801      | 11817 | 11765 | 12035 | 11644                                                   | Bacteria | Actinobacteria | Actinomycetales   | Actinomycetaceae   |  |  | Actinomycetes    | unclassified                |
| 40442 | 8297            | 9205   |        | 6854    | 7600      | 11861 | 12854 | 12115 | 12462                                                   | Bacteria | Actinobacteria | Actinomycetales   | Actinomycetaceae   |  |  | Actinomycetes    | unclassified                |
| 40443 | 9397            | 8451   |        | 7079    | 7914      | 11586 | 11429 | 11844 | 11176                                                   | Bacteria | Actinobacteria | Actinomycetales   | Actinomycetaceae   |  |  | Actinomycetes    | unclassified                |
| 40492 | 8452            | 9830   |        | 6650    | 8121      | 11669 | 11799 | 12089 | 11720                                                   | Bacteria | Actinobacteria | Actinomycetales   | Actinomycetaceae   |  |  | Actinomycetes    | unclassified                |
| 40549 | 8102            | 7004   |        | 6319    | 6588      | 11306 | 12071 | 11718 | 11099                                                   | Bacteria | Actinobacteria | Actinomycetales   | Actinomycetaceae   |  |  | Actinomycetes    | unclassified                |
| 40733 | 8211            | 8399   |        | 7863    | 8240      | 12059 | 12107 | 12063 | 12009                                                   | Bacteria | Actinobacteria | Actinomycetales   | Actinomycetaceae   |  |  | Actinomycetes    | unclassified                |
| 40774 | 8679            | 7404   |        | 6608    | 7624      | 11444 | 11203 | 11831 | 10999                                                   | Bacteria | Actinobacteria | Actinomycetales   | Actinomycetaceae   |  |  | Actinomycetes    | unclassified                |
| 40838 | 8679            | 7404   |        | 6608    | 7624      | 11444 | 11203 | 11831 | 10999                                                   | Bacteria | Actinobacteria | Actinomycetales   | Actinomycetaceae   |  |  | Actinomycetes    | unclassified                |
| 40892 | 8692            | 10148  |        | 6712    | 8176      | 11990 | 12319 | 12370 | 12109                                                   | Bacteria | Actinobacteria | Actinomycetales   | Actinomycetaceae   |  |  | Actinomycetes    | unclassified                |
| 40929 | 9151            | 10014  |        | 9338    | 9315      | 12070 | 12261 | 12289 | 11972                                                   | Bacteria | Actinobacteria | Actinomycetales   | Actinomycetaceae   |  |  | Actinomycetes    | unclassified                |
| 40958 | 8277            | 8751   |        | 6791    | 7599      | 11764 | 11861 | 12130 | 11704                                                   | Bacteria | Actinobacteria | Actinomycetales   | Actinomycetaceae   |  |  | Actinomycetes    | unclassified                |
| 37393 | 9594            |        |        | 8036    | 7399      | 12218 | 12218 | 12218 | 12218                                                   | Bacteria | Actinobacteria | Actinomycetales   | Actinomycetaceae   |  |  | Actinokineospora | unclassified                |
| 37407 | 8258            | 8441   |        | 6571    | 7391      | 12215 | 12363 | 12491 | 12491                                                   | Bacteria | Actinobacteria | Actinomycetales   | Actinomycetaceae   |  |  | Actinokineospora | Actinokineospora diospyrosa |
| 37619 | 9520            | 11896  |        | 6986    | 7510      | 12947 | 13811 | 13158 | 13621                                                   | Bacteria | Actinobacteria | Actinomycetales   | Actinomycetaceae   |  |  | Actinokineospora | Actinokineospora diospyrosa |
| 41015 | 8003            | 7830   |        | 6291    | 6853      | 11595 | 11989 | 11655 | 12826                                                   | Bacteria | Actinobacteria | Actinomycetales   | Actinomycetaceae   |  |  | Beutenbergiaceae | unclassified                |
| 40375 | 9522            | 9854   |        | 6806    | 8167      | 11034 | 12426 | 11443 | 11694                                                   | Bacteria | Actinobacteria | Actinomycetales   | Bogoriellaceae     |  |  | Georgiella       | unclassified                |
| 40890 | 8457            | 8577   |        | 6604    | 6913      | 10995 | 12212 | 11543 | 11710                                                   | Bacteria | Actinobacteria | Actinomycetales   | Bogoriellaceae     |  |  | Georgiella       | unclassified                |
| 40983 | 8152            | 7860   |        | 6485    | 7092      | 11502 | 12313 | 12702 | 12452                                                   | Bacteria | Actinobacteria | Actinomycetales   | Brevibacteriaceae  |  |  | Brevibacterium   | Brevibacterium paucivorans  |
| 40719 | 9426            | 10066  |        | 6954    | 7614      | 11032 | 11980 | 12001 | 13115                                                   | Bacteria | Actinobacteria | Actinomycetales   | Brevibacteriaceae  |  |  | Brevibacterium   | unclassified                |
| 40792 | 8660            | 10614  |        | 7189    | 7526      | 13036 | 13131 | 13220 | 13011                                                   | Bacteria | Actinobacteria | Actinomycetales   | Brevibacteriaceae  |  |  | Brevibacterium   | unclassified                |
| 40882 | 9463            | 10346  |        | 7924    | 8655      | 12329 | 12704 | 12325 | 12537                                                   | Bacteria | Actinobacteria | Actinomycetales   | Brevibacteriaceae  |  |  | Brevibacterium   | unclassified                |
| 40611 | 10103           | 11102  |        | 7501    | 8998      | 12542 | 13356 | 12605 | 12847                                                   | Bacteria | Actinobacteria | Actinomycetales   | Cellulomonadaceae  |  |  | Cellulomonas     | unclassified                |
| 40619 | 8615            | 8921   |        | 6867    | 7660      | 10866 | 12366 | 11033 | 10933                                                   | Bacteria | Actinobacteria | Actinomycetales   | Cellulomonadaceae  |  |  | Cellulomonas     | unclassified                |
| 40917 | 9515            | 11373  |        | 6521    | 7469      | 12012 | 13240 | 12229 | 12510                                                   | Bacteria | Actinobacteria | Actinomycetales   | Cellulomonadaceae  |  |  | Cellulomonas     | unclassified                |
| 40925 | 10814           | 11566  |        | 6485    | 7852      | 12986 | 13649 | 13091 | 13159                                                   | Bacteria | Actinobacteria | Actinomycetales   | Cellulomonadaceae  |  |  | Cellulomonas     | unclassified                |
| 40633 | 10534           | 10152  |        | 10104   | 9034      | 12245 | 13029 | 12131 | 12542                                                   | Bacteria | Actinobacteria | Actinomycetales   | Cellulomonadaceae  |  |  | Cellulomonas     | unclassified                |
| 37779 | 9084            | 10288  |        | 6604    | 8216      | 11430 | 12834 | 11609 | 11821                                                   | Bacteria | Actinobacteria | Actinomycetales   | Cellulomonadaceae  |  |  | unclassified     | unclassified                |
| 37924 | 8637            | 9336   |        | 6735    | 7314      | 11335 | 12647 | 11731 | 12101                                                   | Bacteria | Actinobacteria | Actinomycetales   | Cellulomonadaceae  |  |  | unclassified     | unclassified                |
| 38165 | 8701            | 8974   |        | 8028    | 8187      | 11253 | 12163 | 11330 | 11737                                                   | Bacteria | Actinobacteria | Actinomycetales   | Cellulomonadaceae  |  |  | unclassified     | unclassified                |
| 38303 | 8774            | 9442   |        | 7130    | 6944      | 12520 | 13332 | 12511 | 12851                                                   | Bacteria | Actinobacteria | Actinomycetales   | Cellulomonadaceae  |  |  | unclassified     | unclassified                |
| 39019 | 8868            | 7959   |        | 7191    | 8082      | 11259 | 12365 | 11609 | 11574                                                   | Bacteria | Actinobacteria | Actinomycetales   | Cellulomonadaceae  |  |  | unclassified     | unclassified                |
| 39588 | 9023            | 9056   |        | 7455    | 7549      | 12079 | 13358 | 1286  | 13429                                                   | Bacteria | Actinobacteria | Actinomycetales   | Cellulomonadaceae  |  |  | unclassified     | unclassified                |
| 39602 | 8448            | 8524   |        | 7193    | 8218      | 10886 | 12378 | 11271 | 11770                                                   | Bacteria | Actinobacteria | Actinomycetales   | Cellulomonadaceae  |  |  | unclassified     | unclassified                |
| 40117 | 8772            | 9017   |        | 7267    | 7425      | 11368 | 12507 | 11676 | 12099                                                   | Bacteria | Actinobacteria | Actinomycetales   | Cellulomonadaceae  |  |  | unclassified     | unclassified                |
| 40148 | 9532            | 11002  |        | 6511    | 7464      | 12473 | 13758 | 12601 | 12805                                                   | Bacteria | Actinobacteria | Actinomycetales   | Cellulomonadaceae  |  |  | unclassified     | unclassified                |
| 40335 | 8342            | 9214   |        | 6637    | 6701      | 11972 | 12774 | 12541 | 11922                                                   | Bacteria | Actinobacteria | Actinomycetales   | Cellulomonadaceae  |  |  | unclassified     | unclassified                |
| 40412 | 8754            | 8702   |        | 6528    | 6975      | 11713 | 12619 | 11437 | 11791                                                   | Bacteria | Actinobacteria | Actinomycetales   | Cellulomonadaceae  |  |  | unclassified     | unclassified                |
| 40419 | 9619            | 9385   |        | 6770    | 8149      | 11392 | 12862 | 12157 | 12129                                                   | Bacteria | Actinobacteria | Actinomycetales   | Cellulomonadaceae  |  |  | unclassified     | unclassified                |
| 40988 | 9262            | 10246  |        | 7625    | 8217      | 12410 | 13545 | 12818 | 12920                                                   | Bacteria | Actinobacteria | Actinomycetales   | Cellulomonadaceae  |  |  | unclassified     | unclassified                |
| 41745 | 9505            | 11141  |        | 6747    | 8448      | 12456 | 13357 | 12294 | 12836                                                   | Bacteria | Actinobacteria | Actinomycetales   | Cellulomonadaceae  |  |  | unclassified     | unclassified                |
| 41851 | 8438            | 9648   |        | 6508    | 6892      | 12446 | 13386 | 12798 | 13003                                                   | Bacteria | Actinobacteria | Actinomycetales   | Cellulomonadaceae  |  |  | unclassified     | unclassified                |
| 42097 | 9561            | 9406   |        | 8650    | 8023      | 11928 | 12302 | 12149 | 12212                                                   | Bacteria | Actinobacteria | Actinomycetales   | Cellulomonadaceae  |  |  | unclassified     | unclassified                |
| 36899 | 9258            | 9982   |        | 7377    | 7787      | 12809 | 13098 | 13108 | 13800                                                   | Bacteria | Actinobacteria | Actinomycetales   | Corynebacteriaceae |  |  | Corynebacterium  | Corynebacterium flavescens  |
| 37247 | 8676            | 7711   |        | 6992    | 7601      | 12226 | 12298 | 12362 | 13198                                                   | Bacteria | Actinobacteria | Actinomycetales   | Corynebacteriaceae |  |  | Corynebacterium  | Corynebacterium jeikeium    |
| 37280 | 10112           | 9674   |        | 9074    | 8073      | 13417 | 13408 | 13671 | 14024                                                   | Bacteria | Actinobacteria | Actinomycetales   | Corynebacteriaceae |  |  | Corynebacterium  | Corynebacterium jeikeium    |
| 37312 | 9859            | 9573   |        | 9186    | 9012      | 12206 | 12668 | 12570 | 12776                                                   | Bacteria | Actinobacteria | Actinomycetales   | Corynebacteriaceae |  |  | Corynebacterium  | Corynebacterium variable    |
| 28504 | 12552           | 13345  |        | 12771   | 12431     | 14209 | 14192 | 13956 | 14258                                                   | Bacteria | Actinobacteria | Actinomycetales   | Corynebacteriaceae |  |  | Corynebacterium  | unclassified                |
| 28641 | 13072           | 13073  |        | 12236   | 11584     | 13877 | 14187 | 14188 | 14399                                                   | Bacteria | Actinobacteria | Actinomycetales   | Corynebacteriaceae |  |  | Corynebacterium  | unclassified                |
| 28655 | 8300            | 8544   |        | 5900    | 6775      | 11792 | 13045 | 12271 | 13034                                                   | Bacteria | Actinobacteria | Actinomycetales   | Corynebacteriaceae |  |  | Corynebacterium  | unclassified                |
| 28664 | 8464            | 8987   |        | 6315    | 7030      | 11151 | 12106 | 11388 | 12334                                                   | Bacteria | Actinobacteria | Actinomycetales   | Corynebacteriaceae |  |  | Corynebacterium  | unclassified                |
| 28691 | 11759           | 12293  |        | 10928   | 11004     | 14448 | 14223 | 14164 | 14501                                                   |          |                |                   |                    |  |  |                  |                             |

Table S6 (part B): Hy5Scores of OTUs that were called present in at least one of the samples. Taxonomic classifications are based on PhylChip taxonomy (derived from GreenGenes). Please note, that data presented here was rank normalized before performing statistical analyses presented in the manuscript.

| OTU   | Sample ID (PMA) |        |         |         | Sample ID |       |        |       | taxonomic classification of representative rOTU cluster |                |                |                 |                    |  |  | genus           | species      |
|-------|-----------------|--------|---------|---------|-----------|-------|--------|-------|---------------------------------------------------------|----------------|----------------|-----------------|--------------------|--|--|-----------------|--------------|
|       | UR_PMA          | CR_PMA | CRB_PMA | CRS_PMA | UR        | CO    | CRB    | CRS   | Kingdom                                                 | phylum         | class          | order           | family             |  |  |                 |              |
| 30922 | 10373           | 10545  | 8707    | 8517    | 12392     | 12691 | 12452  | 12886 | Bacteria                                                | Actinobacteria | Actinobacteria | Actinomycetales | Corynebacteriaceae |  |  | Corynebacterium | unclassified |
| 30996 | 12222           | 12760  | 12292   | 10988   | 14214     | 14191 | 14124  | 14459 | Bacteria                                                | Actinobacteria | Actinobacteria | Actinomycetales | Corynebacteriaceae |  |  | Corynebacterium | unclassified |
| 31080 | 9314            | 8137   | 6294    | 7015    | 12274     | 12638 | 12367  | 13365 | Bacteria                                                | Actinobacteria | Actinobacteria | Actinomycetales | Corynebacteriaceae |  |  | Corynebacterium | unclassified |
| 31163 | 10500           | 11612  | 8983    | 7816    | 13198     | 13358 | 13327  | 13901 | Bacteria                                                | Actinobacteria | Actinobacteria | Actinomycetales | Corynebacteriaceae |  |  | Corynebacterium | unclassified |
| 31205 | 8707            | 9169   | 6453    | 6700    | 12331     | 12816 | 12185  | 12316 | Bacteria                                                | Actinobacteria | Actinobacteria | Actinomycetales | Corynebacteriaceae |  |  | Corynebacterium | unclassified |
| 31218 | 11793           | 12448  | 12025   | 12087   | 13933     | 13883 | 14078  | 14047 | Bacteria                                                | Actinobacteria | Actinobacteria | Actinomycetales | Corynebacteriaceae |  |  | Corynebacterium | unclassified |
| 31307 | 12559           | 12817  | 12838   | 12699   | 14141     | 14081 | 14040  | 14276 | Bacteria                                                | Actinobacteria | Actinobacteria | Actinomycetales | Corynebacteriaceae |  |  | Corynebacterium | unclassified |
| 31479 | 9451            | 9962   | 7306    | 7278    | 13363     | 13645 | 13557  | 13974 | Bacteria                                                | Actinobacteria | Actinobacteria | Actinomycetales | Corynebacteriaceae |  |  | Corynebacterium | unclassified |
| 31616 | 10603           | 11130  | 10605   | 9112    | 13126     | 13280 | 13095  | 13564 | Bacteria                                                | Actinobacteria | Actinobacteria | Actinomycetales | Corynebacteriaceae |  |  | Corynebacterium | unclassified |
| 31655 | 10422           | 10609  | 10208   | 8642    | 13148     | 13277 | 13168  | 13869 | Bacteria                                                | Actinobacteria | Actinobacteria | Actinomycetales | Corynebacteriaceae |  |  | Corynebacterium | unclassified |
| 31702 | 11315           | 12178  | 10364   | 9869    | 13972     | 14034 | 14027  | 14349 | Bacteria                                                | Actinobacteria | Actinobacteria | Actinomycetales | Corynebacteriaceae |  |  | Corynebacterium | unclassified |
| 31823 | 12676           | 13325  | 12880   | 12074   | 14217     | 14321 | 14346  | 14566 | Bacteria                                                | Actinobacteria | Actinobacteria | Actinomycetales | Corynebacteriaceae |  |  | Corynebacterium | unclassified |
| 32200 | 11515           | 11894  | 14410   | 9988    | 12734     | 13021 | 12706  | 13230 | Bacteria                                                | Actinobacteria | Actinobacteria | Actinomycetales | Corynebacteriaceae |  |  | Corynebacterium | unclassified |
| 32344 | 12760           | 12618  | 12518   | 11830   | 14622     | 14452 | 14479  | 14816 | Bacteria                                                | Actinobacteria | Actinobacteria | Actinomycetales | Corynebacteriaceae |  |  | Corynebacterium | unclassified |
| 32357 | 9158            | 8017   | 5839    | 6806    | 13063     | 12974 | 13053  | 14157 | Bacteria                                                | Actinobacteria | Actinobacteria | Actinomycetales | Corynebacteriaceae |  |  | Corynebacterium | unclassified |
| 32411 | 11495           | 12582  | 11489   | 11283   | 14391     | 14385 | 14426  | 14482 | Bacteria                                                | Actinobacteria | Actinobacteria | Actinomycetales | Corynebacteriaceae |  |  | Corynebacterium | unclassified |
| 32607 | 9150            | 9009   | 7498    | 7676    | 12736     | 12763 | 12646  | 13698 | Bacteria                                                | Actinobacteria | Actinobacteria | Actinomycetales | Corynebacteriaceae |  |  | Corynebacterium | unclassified |
| 32857 | 10302           | 10739  | 9588    | 8219    | 13623     | 13435 | 13228  | 14067 | Bacteria                                                | Actinobacteria | Actinobacteria | Actinomycetales | Corynebacteriaceae |  |  | Corynebacterium | unclassified |
| 33058 | 9596            | 10293  | 7924    | 7846    | 13189     | 13426 | 13207  | 13828 | Bacteria                                                | Actinobacteria | Actinobacteria | Actinomycetales | Corynebacteriaceae |  |  | Corynebacterium | unclassified |
| 33189 | 1087            | 7098   | 6453    | 11653   | 12108     | 11468 | 12701  | 13079 | Bacteria                                                | Actinobacteria | Actinobacteria | Actinomycetales | Corynebacteriaceae |  |  | Corynebacterium | unclassified |
| 33258 | 12061           | 10896  | 11219   | 10985   | 14626     | 14402 | 14540  | 14812 | Bacteria                                                | Actinobacteria | Actinobacteria | Actinomycetales | Corynebacteriaceae |  |  | Corynebacterium | unclassified |
| 33300 | 9380            | 9599   | 9276    | 8510    | 12013     | 12823 | 12142  | 12993 | Bacteria                                                | Actinobacteria | Actinobacteria | Actinomycetales | Corynebacteriaceae |  |  | Corynebacterium | unclassified |
| 33488 | 10117           | 10731  | 9727    | 8705    | 13740     | 13750 | 13276  | 14094 | Bacteria                                                | Actinobacteria | Actinobacteria | Actinomycetales | Corynebacteriaceae |  |  | Corynebacterium | unclassified |
| 33570 | 8889            | 7768   | 7373    | 7996    | 11803     | 12598 | 11937  | 12860 | Bacteria                                                | Actinobacteria | Actinobacteria | Actinomycetales | Corynebacteriaceae |  |  | Corynebacterium | unclassified |
| 33576 | 9333            | 9679   | 7246    | 8438    | 13185     | 13328 | 13463  | 13959 | Bacteria                                                | Actinobacteria | Actinobacteria | Actinomycetales | Corynebacteriaceae |  |  | Corynebacterium | unclassified |
| 33646 | 9162            | 9190   | 7287    | 7727    | 12350     | 12673 | 12764  | 13269 | Bacteria                                                | Actinobacteria | Actinobacteria | Actinomycetales | Corynebacteriaceae |  |  | Corynebacterium | unclassified |
| 33688 | 10768           | 11098  | 9381    | 13413   | 13525     | 13387 | 13873  | 14078 | Bacteria                                                | Actinobacteria | Actinobacteria | Actinomycetales | Corynebacteriaceae |  |  | Corynebacterium | unclassified |
| 33709 | 9764            | 9771   | 7701    | 8393    | 13796     | 13858 | 13777  | 14185 | Bacteria                                                | Actinobacteria | Actinobacteria | Actinomycetales | Corynebacteriaceae |  |  | Corynebacterium | unclassified |
| 33847 | 9439            | 9823   | 9046    | 7341    | 12809     | 13067 | 13074  | 13736 | Bacteria                                                | Actinobacteria | Actinobacteria | Actinomycetales | Corynebacteriaceae |  |  | Corynebacterium | unclassified |
| 33873 | 12069           | 12643  | 12338   | 11191   | 13843     | 13908 | 13846  | 14084 | Bacteria                                                | Actinobacteria | Actinobacteria | Actinomycetales | Corynebacteriaceae |  |  | Corynebacterium | unclassified |
| 33892 | 9209            | 8728   | 8433    | 7564    | 11878     | 11920 | 12006  | 13248 | Bacteria                                                | Actinobacteria | Actinobacteria | Actinomycetales | Corynebacteriaceae |  |  | Corynebacterium | unclassified |
| 33895 | 11661           | 12201  | 11485   | 10972   | 14261     | 14026 | 14021  | 14320 | Bacteria                                                | Actinobacteria | Actinobacteria | Actinomycetales | Corynebacteriaceae |  |  | Corynebacterium | unclassified |
| 34124 | 10599           | 11253  | 10483   | 9446    | 13330     | 13446 | 13352  | 13744 | Bacteria                                                | Actinobacteria | Actinobacteria | Actinomycetales | Corynebacteriaceae |  |  | Corynebacterium | unclassified |
| 34248 | 10319           | 10387  | 9868    | 8343    | 12963     | 12813 | 125349 | 13078 | Bacteria                                                | Actinobacteria | Actinobacteria | Actinomycetales | Corynebacteriaceae |  |  | Corynebacterium | unclassified |
| 34246 | 9471            | 9897   | 7917    | 8008    | 13436     | 13371 | 13293  | 13803 | Bacteria                                                | Actinobacteria | Actinobacteria | Actinomycetales | Corynebacteriaceae |  |  | Corynebacterium | unclassified |
| 34266 | 11633           | 12121  | 11950   | 11279   | 13315     | 13638 | 13311  | 13725 | Bacteria                                                | Actinobacteria | Actinobacteria | Actinomycetales | Corynebacteriaceae |  |  | Corynebacterium | unclassified |
| 34318 | 10559           | 11700  | 9328    | 8406    | 13727     | 13778 | 14195  | 14177 | Bacteria                                                | Actinobacteria | Actinobacteria | Actinomycetales | Corynebacteriaceae |  |  | Corynebacterium | unclassified |
| 34389 | 12411           | 12911  | 12439   | 11149   | 14537     | 14472 | 14436  | 14753 | Bacteria                                                | Actinobacteria | Actinobacteria | Actinomycetales | Corynebacteriaceae |  |  | Corynebacterium | unclassified |
| 34438 | 11142           | 12071  | 11068   | 10083   | 13718     | 13811 | 13659  | 13979 | Bacteria                                                | Actinobacteria | Actinobacteria | Actinomycetales | Corynebacteriaceae |  |  | Corynebacterium | unclassified |
| 34464 | 12846           | 13241  | 12895   | 11919   | 13530     | 13545 | 13516  | 13993 | Bacteria                                                | Actinobacteria | Actinobacteria | Actinomycetales | Corynebacteriaceae |  |  | Corynebacterium | unclassified |
| 34708 | 12165           | 12920  | 11465   | 14498   | 14412     | 14643 | 14569  | 14781 | Bacteria                                                | Actinobacteria | Actinobacteria | Actinomycetales | Corynebacteriaceae |  |  | Corynebacterium | unclassified |
| 34741 | 11617           | 11942  | 12138   | 10760   | 12347     | 12747 | 12312  | 12656 | Bacteria                                                | Actinobacteria | Actinobacteria | Actinomycetales | Corynebacteriaceae |  |  | Corynebacterium | unclassified |
| 34803 | 8584            | 6937   | 6219    | 7413    | 12443     | 12941 | 13149  | 13813 | Bacteria                                                | Actinobacteria | Actinobacteria | Actinomycetales | Corynebacteriaceae |  |  | Corynebacterium | unclassified |
| 35009 | 12382           | 12781  | 11656   | 11667   | 14461     | 14219 | 14250  | 14655 | Bacteria                                                | Actinobacteria | Actinobacteria | Actinomycetales | Corynebacteriaceae |  |  | Corynebacterium | unclassified |
| 35030 | 12595           | 13334  | 11862   | 11812   | 14183     | 14120 | 14158  | 14453 | Bacteria                                                | Actinobacteria | Actinobacteria | Actinomycetales | Corynebacteriaceae |  |  | Corynebacterium | unclassified |
| 35066 | 11695           | 12300  | 11683   | 10728   | 13792     | 13892 | 13649  | 13975 | Bacteria                                                | Actinobacteria | Actinobacteria | Actinomycetales | Corynebacteriaceae |  |  | Corynebacterium | unclassified |
| 35165 | 12889           | 13478  | 12568   | 12571   | 14654     | 14331 | 14406  | 14675 | Bacteria                                                | Actinobacteria | Actinobacteria | Actinomycetales | Corynebacteriaceae |  |  | Corynebacterium | unclassified |
| 35183 | 8734            | 6675   | 6267    | 6882    | 13468     | 12527 | 12638  | 13399 | Bacteria                                                | Actinobacteria | Actinobacteria | Actinomycetales | Corynebacteriaceae |  |  | Corynebacterium | unclassified |
| 35227 | 9409            | 10954  | 7051    | 7631    | 12478     | 12622 | 12162  | 12539 | Bacteria                                                | Actinobacteria | Actinobacteria | Actinomycetales | Corynebacteriaceae |  |  | Corynebacterium | unclassified |
| 35235 | 13192           | 13848  | 13269   | 12185   | 14590     | 14490 | 14478  | 14777 | Bacteria                                                | Actinobacteria | Actinobacteria | Actinomycetales | Corynebacteriaceae |  |  | Corynebacterium | unclassified |
| 35240 | 10976           | 12368  | 8816    | 9572    | 14429     | 14107 | 14334  | 14634 | Bacteria                                                | Actinobacteria | Actinobacteria | Actinomycetales | Corynebacteriaceae |  |  | Corynebacterium | unclassified |
| 35254 | 12603           | 12667  | 12305   | 11592   | 14182     | 14011 | 13992  | 14311 | Bacteria                                                | Actinobacteria | Actinobacteria | Actinomycetales | Corynebacteriaceae |  |  | Corynebacterium | unclassified |
| 35512 | 11294           | 11867  | 10516   | 10079   | 14155     | 14037 | 14037  | 14377 | Bacteria                                                | Actinobacteria | Actinobacteria | Actinomycetales | Corynebacteriaceae |  |  | Corynebacterium | unclassified |
| 35586 | 8917            | 8721   | 6578    | 7188    | 12940     | 12847 | 12706  | 13729 | Bacteria                                                | Actinobacteria | Actinobacteria | Actinomycetales | Corynebacteriaceae |  |  | Corynebacterium | unclassified |
| 35629 | 9431            | 8579   | 6579    | 7188    | 13246     | 12889 | 13148  | 14188 | Bacteria                                                | Actinobacteria | Actinobacteria | Actinomycetales | Corynebacteriaceae |  |  | Corynebacterium | unclassified |
| 35716 | 9211            | 9444   | 8022    | 7763    | 12173     | 12399 | 12249  | 13095 | Bacteria                                                | Actinobacteria | Actinobacteria | Actinomycetales | Corynebacteriaceae |  |  | Corynebacterium | unclassified |
| 35819 | 12146           | 13134  | 11335   | 11260   | 14471     | 14322 | 14637  | 14651 | Bacteria                                                | Actinobacteria | Actinobacteria | Actinomycetales | Corynebacteriaceae |  |  | Corynebacterium | unclassified |
| 35860 | 11628           | 11402  | 5472    | 10412   | 14621     | 14194 | 14457  | 14512 | Bacteria                                                | Actinobacteria | Actinobacteria | Actinomycetales | Corynebacteriaceae |  |  | Corynebacterium | unclassified |
| 36035 | 11334           | 11878  | 11682   | 9930    | 13715     | 13703 | 13622  | 13993 | Bacteria                                                | Actinobacteria | Actinobacteria | Actinomycetales | Corynebacteriaceae |  |  | Corynebacterium | unclassified |
| 36089 | 8588            | 7786   | 6279    | 7288    | 12834     | 13075 | 13245  | 13965 | Bacteria                                                | Actinobacteria | Actinobacteria | Actinomycetales | Corynebacteriaceae |  |  | Corynebacterium | unclassified |
| 36091 | 12031           | 12653  | 11840   | 10842   | 14181     | 14147 | 14094  | 14411 | Bacteria                                                | Actinobacteria | Actinobacteria | Actinomycetales | Corynebacteriaceae |  |  | Corynebacterium | unclassified |
| 36117 | 10699           | 11303  | 12347   | 11991   | 14213     | 14211 | 14149  | 14495 | Bacteria                                                | Actinobacteria | Actinobacteria | Actinomycetales | Corynebacteriaceae |  |  | Corynebacterium | unclassified |
| 36142 | 10472           | 11118  | 10542   | 9313    | 12180     | 13059 | 12886  | 13735 | Bacteria                                                | Actinobacteria | Actinobacteria | Actinomycetales | Corynebacteriaceae |  |  | Corynebacterium | unclassified |
| 36231 | 8448            | 8320   | 6935    | 7095    | 12599     | 13009 | 12989  | 13535 | Bacteria                                                | Actinobacteria | Actinobacteria | Actinomycetales | Corynebacteriaceae |  |  | Corynebacterium | unclassified |
| 36381 | 9577            | 8803   | 7288    | 6965    | 13476     | 13260 | 13495  | 13919 | Bacteria                                                | Actinobacteria | Actinobacteria | Actinomycetales | Corynebacteriaceae |  |  | Corynebacterium | unclassified |
| 36510 | 10981           | 12104  | 10924   | 10874   | 14234     | 14324 | 14314  | 14444 | Bacteria                                                | Actinobacteria | Actinobacteria | Actinomycetales | Corynebacteriaceae |  |  | Corynebacterium | unclassified |
| 36542 | 12432           | 12836  | 12729   | 12610   | 13107     | 12948 | 12974  | 13663 | Bacteria                                                | Actinobacteria | Actinobacteria | Actinomycetales | Corynebacteriaceae |  |  | Corynebacterium | unclassified |
| 36693 | 11379           | 11661  | 11202   | 10423   | 13747     | 13684 | 13376  | 14034 | Bacteria                                                | Actinobacteria | Actinobacteria | Actinomycetales | Corynebacteriaceae |  |  | Corynebacterium | unclassified |
| 36754 | 9378            | 10095  | 8617    | 8668    | 12112     | 12708 | 12417  | 12841 | Bacteria                                                | Actinobacteria | Actinobacteria | Actinomycetales | Corynebacteriaceae |  |  | Corynebacterium | unclassified |
| 36759 | 9151            | 10056  | 8134    | 7654    | 12378     | 13077 | 13186  | 13896 | Bacteria                                                | Actinobacteria | Actinobacteria | Actinomycetales | Corynebacteriaceae |  |  | Corynebacterium | unclassified |
| 36762 | 10358           | 9298   | 6308    | 7603    | 13306     | 13296 | 13526  | 14138 | Bacteria                                                | Actinobacteria | Actinobacteria | Actinomycetales | Corynebacteriaceae |  |  | Corynebacterium | unclassified |
| 36763 | 10281           | 10447  | 7898    | 7704    | 12940     | 13265 | 13176  | 13539 | Bacteria                                                | Actinobacteria | Actinobacteria | Actinomycetales | Corynebacteriaceae |  |  | Corynebacterium | unclassified |
| 36770 | 12582           | 12727  | 12186   | 11616   | 13477     | 13426 | 13188  | 13549 | Bacteria                                                | Actinobacteria | Actinobacteria | Actinomycetales | Corynebacteriaceae |  |  | Corynebacterium | unclassified |
| 36772 | 9730            | 8856   | 7665    | 8005    | 13028     | 12917 | 13104  | 13768 | Bacteria                                                | Actinobacteria | Actinobacteria | Actinomycetales | Corynebacteriaceae |  |  | Coryneb         |              |

Table S6 (part C): HybScores of OTUs that were called present in at least one of the samples. Taxonomic classifications are based on PhyloChip taxonomy (derived from GreenGenes). Please note, that data presented here was rank normalized before performing statistical analyses presented in the manuscript.

| Sample ID (PMA) |        |        |         |         | Sample ID |       |       |         |        | taxonomic classification of representative OTU cluster |                |                |                 |                    |                 |              |  |  |       |         |  |
|-----------------|--------|--------|---------|---------|-----------|-------|-------|---------|--------|--------------------------------------------------------|----------------|----------------|-----------------|--------------------|-----------------|--------------|--|--|-------|---------|--|
| OTU             | UR_PMA | CO_PMA | CRS_PMA | CRS_PMA | UR_CO     | CRS   | CRS   | kingdom | phylum | class                                                  | order          | family         |                 |                    |                 |              |  |  | genus | species |  |
| 36980           | 11038  | 11840  | 10630   |         | 9993      | 12980 | 13378 | 13163   | 13797  | Bacteria                                               | Actinobacteria | Actinobacteria | Actinomycetales | Corynebacteriaceae | Corynebacterium | unclassified |  |  |       |         |  |
| 36983           | 9012   | 8392   | 7021    |         | 8014      | 11258 | 12006 | 11671   | 12191  | Bacteria                                               | Actinobacteria | Actinobacteria | Actinomycetales | Corynebacteriaceae | Corynebacterium | unclassified |  |  |       |         |  |
| 36992           | 9917   | 10596  | 8822    |         | 8990      | 13864 | 13578 | 13529   | 13844  | Bacteria                                               | Actinobacteria | Actinobacteria | Actinomycetales | Corynebacteriaceae | Corynebacterium | unclassified |  |  |       |         |  |
| 37002           | 9980   | 9615   | 6823    |         | 7457      | 13462 | 13481 | 13424   | 13879  | Bacteria                                               | Actinobacteria | Actinobacteria | Actinomycetales | Corynebacteriaceae | Corynebacterium | unclassified |  |  |       |         |  |
| 37004           | 8635   | 9012   | 6394    |         | 7853      | 12554 | 12756 | 12528   | 13481  | Bacteria                                               | Actinobacteria | Actinobacteria | Actinomycetales | Corynebacteriaceae | Corynebacterium | unclassified |  |  |       |         |  |
| 37007           | 8976   | 8328   | 6433    |         | 7666      | 12364 | 12438 | 12293   | 13113  | Bacteria                                               | Actinobacteria | Actinobacteria | Actinomycetales | Corynebacteriaceae | Corynebacterium | unclassified |  |  |       |         |  |
| 37025           | 8325   | 7521   | 6914    |         | 7137      | 10594 | 12507 | 12131   | 11626  | Bacteria                                               | Actinobacteria | Actinobacteria | Actinomycetales | Corynebacteriaceae | Corynebacterium | unclassified |  |  |       |         |  |
| 37029           | 11490  | 11582  | 10977   |         | 7832      | 13640 | 13682 | 13631   | 14079  | Bacteria                                               | Actinobacteria | Actinobacteria | Actinomycetales | Corynebacteriaceae | Corynebacterium | unclassified |  |  |       |         |  |
| 37036           | 9677   | 9487   | 7271    |         | 7914      | 11462 | 12285 | 11667   | 12244  | Bacteria                                               | Actinobacteria | Actinobacteria | Actinomycetales | Corynebacteriaceae | Corynebacterium | unclassified |  |  |       |         |  |
| 37046           | 9860   | 9379   | 9118    |         | 9565      | 12585 | 12653 | 12654   | 13568  | Bacteria                                               | Actinobacteria | Actinobacteria | Actinomycetales | Corynebacteriaceae | Corynebacterium | unclassified |  |  |       |         |  |
| 37061           | 8851   | 7492   | 6405    |         | 6803      | 12868 | 12684 | 12659   | 14156  | Bacteria                                               | Actinobacteria | Actinobacteria | Actinomycetales | Corynebacteriaceae | Corynebacterium | unclassified |  |  |       |         |  |
| 37071           | 9754   | 8759   | 6440    |         | 7532      | 12761 | 13007 | 13181   | 13709  | Bacteria                                               | Actinobacteria | Actinobacteria | Actinomycetales | Corynebacteriaceae | Corynebacterium | unclassified |  |  |       |         |  |
| 37076           | 11521  | 12146  | 11997   |         | 11503     | 13821 | 13815 | 13657   | 13920  | Bacteria                                               | Actinobacteria | Actinobacteria | Actinomycetales | Corynebacteriaceae | Corynebacterium | unclassified |  |  |       |         |  |
| 37086           | 7954   | 6428   | 6118    |         | 7031      | 11065 | 11757 | 11069   | 12254  | Bacteria                                               | Actinobacteria | Actinobacteria | Actinomycetales | Corynebacteriaceae | Corynebacterium | unclassified |  |  |       |         |  |
| 37089           | 10317  | 9572   | 6623    |         | 8042      | 13332 | 13166 | 13393   | 14041  | Bacteria                                               | Actinobacteria | Actinobacteria | Actinomycetales | Corynebacteriaceae | Corynebacterium | unclassified |  |  |       |         |  |
| 37097           | 11066  | 11769  | 9333    |         | 8517      | 14240 | 14058 | 14195   | 14695  | Bacteria                                               | Actinobacteria | Actinobacteria | Actinomycetales | Corynebacteriaceae | Corynebacterium | unclassified |  |  |       |         |  |
| 37107           | 9829   | 9237   | 7005    |         | 7874      | 12883 | 13147 | 13190   | 13370  | Bacteria                                               | Actinobacteria | Actinobacteria | Actinomycetales | Corynebacteriaceae | Corynebacterium | unclassified |  |  |       |         |  |
| 37124           | 10243  | 10054  | 9695    |         | 8207      | 12484 | 12637 | 12411   | 13113  | Bacteria                                               | Actinobacteria | Actinobacteria | Actinomycetales | Corynebacteriaceae | Corynebacterium | unclassified |  |  |       |         |  |
| 37125           | 9746   | 9459   | 7201    |         | 7622      | 13031 | 13217 | 13196   | 13557  | Bacteria                                               | Actinobacteria | Actinobacteria | Actinomycetales | Corynebacteriaceae | Corynebacterium | unclassified |  |  |       |         |  |
| 37129           | 10296  | 9556   | 7198    |         | 8123      | 13456 | 13302 | 13518   | 14166  | Bacteria                                               | Actinobacteria | Actinobacteria | Actinomycetales | Corynebacteriaceae | Corynebacterium | unclassified |  |  |       |         |  |
| 37151           | 10154  | 9577   | 7348    |         | 7875      | 12521 | 13228 | 12853   | 14010  | Bacteria                                               | Actinobacteria | Actinobacteria | Actinomycetales | Corynebacteriaceae | Corynebacterium | unclassified |  |  |       |         |  |
| 37161           | 8974   | 8228   | 6824    |         | 7330      | 12726 | 12825 | 12947   | 13747  | Bacteria                                               | Actinobacteria | Actinobacteria | Actinomycetales | Corynebacteriaceae | Corynebacterium | unclassified |  |  |       |         |  |
| 37166           | 8125   | 7711   | 6732    |         | 7218      | 11907 | 11848 | 11678   | 13077  | Bacteria                                               | Actinobacteria | Actinobacteria | Actinomycetales | Corynebacteriaceae | Corynebacterium | unclassified |  |  |       |         |  |
| 37170           | 9453   | 10135  | 7183    |         | 7745      | 12424 | 13001 | 12578   | 12791  | Bacteria                                               | Actinobacteria | Actinobacteria | Actinomycetales | Corynebacteriaceae | Corynebacterium | unclassified |  |  |       |         |  |
| 37172           | 8286   | 8199   | 6921    |         | 7580      | 11844 | 12150 | 12224   | 12043  | Bacteria                                               | Actinobacteria | Actinobacteria | Actinomycetales | Corynebacteriaceae | Corynebacterium | unclassified |  |  |       |         |  |
| 37178           | 10144  | 9922   | 6921    |         | 7620      | 12557 | 13148 | 12877   | 12966  | Bacteria                                               | Actinobacteria | Actinobacteria | Actinomycetales | Corynebacteriaceae | Corynebacterium | unclassified |  |  |       |         |  |
| 37188           | 9158   | 8782   | 7043    |         | 7878      | 12866 | 12713 | 12147   | 13171  | Bacteria                                               | Actinobacteria | Actinobacteria | Actinomycetales | Corynebacteriaceae | Corynebacterium | unclassified |  |  |       |         |  |
| 37189           | 10977  | 11454  | 9766    |         | 10160     | 12500 | 12602 | 12667   | 12931  | Bacteria                                               | Actinobacteria | Actinobacteria | Actinomycetales | Corynebacteriaceae | Corynebacterium | unclassified |  |  |       |         |  |
| 37193           | 9800   | 10002  | 6949    |         | 7616      | 12884 | 13201 | 13088   | 13641  | Bacteria                                               | Actinobacteria | Actinobacteria | Actinomycetales | Corynebacteriaceae | Corynebacterium | unclassified |  |  |       |         |  |
| 37198           | 11045  | 10510  | 10020   |         | 9906      | 13083 | 13212 | 13283   | 13585  | Bacteria                                               | Actinobacteria | Actinobacteria | Actinomycetales | Corynebacteriaceae | Corynebacterium | unclassified |  |  |       |         |  |
| 37199           | 8988   | 8837   | 7148    |         | 7553      | 12118 | 12175 | 12078   | 13051  | Bacteria                                               | Actinobacteria | Actinobacteria | Actinomycetales | Corynebacteriaceae | Corynebacterium | unclassified |  |  |       |         |  |
| 37201           | 10039  | 9174   | 5866    |         | 6263      | 12339 | 12628 | 12505   | 13802  | Bacteria                                               | Actinobacteria | Actinobacteria | Actinomycetales | Corynebacteriaceae | Corynebacterium | unclassified |  |  |       |         |  |
| 37226           | 9315   | 8626   | 5638    |         | 7035      | 12098 | 12388 | 12323   | 12884  | Bacteria                                               | Actinobacteria | Actinobacteria | Actinomycetales | Corynebacteriaceae | Corynebacterium | unclassified |  |  |       |         |  |
| 37232           | 10078  | 9557   | 7099    |         | 7938      | 13456 | 13268 | 13298   | 13739  | Bacteria                                               | Actinobacteria | Actinobacteria | Actinomycetales | Corynebacteriaceae | Corynebacterium | unclassified |  |  |       |         |  |
| 37253           | 11953  | 11994  | 11400   |         | 11307     | 12420 | 13714 | 12742   | 13719  | Bacteria                                               | Actinobacteria | Actinobacteria | Actinomycetales | Corynebacteriaceae | Corynebacterium | unclassified |  |  |       |         |  |
| 37255           | 9608   | 8594   | 7817    |         | 7653      | 12903 | 13093 | 13203   | 13613  | Bacteria                                               | Actinobacteria | Actinobacteria | Actinomycetales | Corynebacteriaceae | Corynebacterium | unclassified |  |  |       |         |  |
| 37259           | 10173  | 10754  | 8872    |         | 8052      | 12809 | 13163 | 12811   | 13739  | Bacteria                                               | Actinobacteria | Actinobacteria | Actinomycetales | Corynebacteriaceae | Corynebacterium | unclassified |  |  |       |         |  |
| 37264           | 9249   | 9641   | 7453    |         | 7653      | 11102 | 11971 | 11452   | 11960  | Bacteria                                               | Actinobacteria | Actinobacteria | Actinomycetales | Corynebacteriaceae | Corynebacterium | unclassified |  |  |       |         |  |
| 37268           | 9330   | 9481   | 7481    |         | 8080      | 11337 | 12095 | 11636   | 12108  | Bacteria                                               | Actinobacteria | Actinobacteria | Actinomycetales | Corynebacteriaceae | Corynebacterium | unclassified |  |  |       |         |  |
| 37293           | 9380   | 8972   | 8939    |         | 8019      | 12037 | 12361 | 12128   | 12607  | Bacteria                                               | Actinobacteria | Actinobacteria | Actinomycetales | Corynebacteriaceae | Corynebacterium | unclassified |  |  |       |         |  |
| 37301           | 10508  | 10689  | 9957    |         | 8787      | 13657 | 13544 | 13749   | 14240  | Bacteria                                               | Actinobacteria | Actinobacteria | Actinomycetales | Corynebacteriaceae | Corynebacterium | unclassified |  |  |       |         |  |
| 37315           | 9461   | 9038   | 7443    |         | 6944      | 13024 | 13018 | 13292   | 13958  | Bacteria                                               | Actinobacteria | Actinobacteria | Actinomycetales | Corynebacteriaceae | Corynebacterium | unclassified |  |  |       |         |  |
| 37316           | 9147   | 8576   | 6898    |         | 7944      | 12420 | 12552 | 12585   | 13239  | Bacteria                                               | Actinobacteria | Actinobacteria | Actinomycetales | Corynebacteriaceae | Corynebacterium | unclassified |  |  |       |         |  |
| 37325           | 9759   | 9201   | 7083    |         | 7364      | 12766 | 13116 | 13078   | 13521  | Bacteria                                               | Actinobacteria | Actinobacteria | Actinomycetales | Corynebacteriaceae | Corynebacterium | unclassified |  |  |       |         |  |
| 37329           | 8951   | 8633   | 7396    |         | 7341      | 12241 | 12561 | 12353   | 13165  | Bacteria                                               | Actinobacteria | Actinobacteria | Actinomycetales | Corynebacteriaceae | Corynebacterium | unclassified |  |  |       |         |  |
| 37358           | 10234  | 8682   | 6445    |         | 7588      | 13204 | 13358 | 13459   | 14085  | Bacteria                                               | Actinobacteria | Actinobacteria | Actinomycetales | Corynebacteriaceae | Corynebacterium | unclassified |  |  |       |         |  |
| 37364           | 9143   | 8097   | 7282    |         | 8081      | 11507 | 11986 | 11905   | 12524  | Bacteria                                               | Actinobacteria | Actinobacteria | Actinomycetales | Corynebacteriaceae | Corynebacterium | unclassified |  |  |       |         |  |
| 37385           | 11132  | 11329  | 10889   |         | 9325      | 13756 | 13704 | 13709   | 14240  | Bacteria                                               | Actinobacteria | Actinobacteria | Actinomycetales | Corynebacteriaceae | Corynebacterium | unclassified |  |  |       |         |  |
| 37394           | 11173  | 11531  | 10974   |         | 9795      | 12400 | 12574 | 12612   | 13634  | Bacteria                                               | Actinobacteria | Actinobacteria | Actinomycetales | Corynebacteriaceae | Corynebacterium | unclassified |  |  |       |         |  |
| 37429           | 11201  | 11510  | 10935   |         | 10100     | 12624 | 12905 | 12575   | 13296  | Bacteria                                               | Actinobacteria | Actinobacteria | Actinomycetales | Corynebacteriaceae | Corynebacterium | unclassified |  |  |       |         |  |
| 37494           | 11116  | 11328  | 10481   |         | 9635      | 12126 | 12959 | 12394   | 13110  | Bacteria                                               | Actinobacteria | Actinobacteria | Actinomycetales | Corynebacteriaceae | Corynebacterium | unclassified |  |  |       |         |  |
| 37576           | 11458  | 11533  | 10720   |         | 9804      | 12764 | 13109 | 12758   | 13205  | Bacteria                                               | Actinobacteria | Actinobacteria | Actinomycetales | Corynebacteriaceae | Corynebacterium | unclassified |  |  |       |         |  |
| 37579           | 11130  | 11515  | 10549   |         | 9654      | 12816 | 13014 | 12741   | 13213  | Bacteria                                               | Actinobacteria | Actinobacteria | Actinomycetales | Corynebacteriaceae | Corynebacterium | unclassified |  |  |       |         |  |
| 37609           | 11619  | 12097  | 10993   |         | 10158     | 11468 | 12465 | 11658   | 12315  | Bacteria                                               | Actinobacteria | Actinobacteria | Actinomycetales | Corynebacteriaceae | Corynebacterium | unclassified |  |  |       |         |  |
| 37735           | 11003  | 11418  | 10551   |         | 9651      | 12496 | 12562 | 12191   | 12476  | Bacteria                                               | Actinobacteria | Actinobacteria | Actinomycetales | Corynebacteriaceae | Corynebacterium | unclassified |  |  |       |         |  |
| 37781           | 11098  | 10965  | 10917   |         | 10130     | 12030 | 13074 | 12682   | 13396  | Bacteria                                               | Actinobacteria | Actinobacteria | Actinomycetales | Corynebacteriaceae | Corynebacterium | unclassified |  |  |       |         |  |
| 37813           | 11499  | 11824  | 11107   |         | 10240     | 12241 | 12917 | 12416   | 13098  | Bacteria                                               | Actinobacteria | Actinobacteria | Actinomycetales | Corynebacteriaceae | Corynebacterium | unclassified |  |  |       |         |  |
| 37820           | 9193   | 9339   | 7901    |         | 7934      | 12095 | 12910 | 12283   | 12856  | Bacteria                                               | Actinobacteria | Actinobacteria | Actinomycetales | Corynebacteriaceae | Corynebacterium | unclassified |  |  |       |         |  |
| 37833           | 11140  | 11297  | 10721   |         | 9679      | 10927 | 11947 | 11258   | 11831  | Bacteria                                               | Actinobacteria | Actinobacteria | Actinomycetales | Corynebacteriaceae | Corynebacterium | unclassified |  |  |       |         |  |
| 37860           | 11022  | 11313  | 10518   |         | 9912      | 11392 | 12154 | 11634   | 12184  | Bacteria                                               | Actinobacteria | Actinobacteria | Actinomycetales | Corynebacteriaceae | Corynebacterium | unclassified |  |  |       |         |  |
| 37877           | 11809  | 12259  | 11554   |         | 10472     | 13309 | 13600 | 13386   | 13816  | Bacteria                                               | Actinobacteria | Actinobacteria | Actinomycetales | Corynebacteriaceae | Corynebacterium | unclassified |  |  |       |         |  |
| 37902           | 11140  | 11678  | 10981   |         | 9848      | 11858 | 12973 | 12364   | 12868  | Bacteria                                               | Actinobacteria | Actinobacteria | Actinomycetales | Corynebacteriaceae | Corynebacterium | unclassified |  |  |       |         |  |
| 38020           | 9596   | 9651   | 9473    |         | 8500      | 13140 | 13258 | 13243   | 13730  | Bacteria                                               | Actinobacteria | Actinobacteria | Actinomycetales | Corynebacteriaceae | Corynebacterium | unclassified |  |  |       |         |  |
| 38164           | 9740   | 9454   | 8419    |         | 8804      | 13265 | 13477 | 13272   | 13769  | Bacteria                                               | Actinobacteria | Actinobacteria | Actinomycetales | Corynebacteriaceae | Corynebacterium | unclassified |  |  |       |         |  |
| 38210           | 11153  | 11400  | 10868   |         | 8824      | 12042 | 12716 | 12172   | 12774  | Bacteria                                               | Actinobacteria | Actinobacteria | Actinomycetales | Corynebacteriaceae | Corynebacterium | unclassified |  |  |       |         |  |

Table S6 (part D): Hy5Scores of OTUs that were called present in at least one of the samples. Taxonomic classifications are based on PhylChip taxonomy (derived from GreenGenes). Please note, that data presented here was rank normalized before performing statistical analyses presented in the manuscript.

| OTU   | Sample ID (PMA) |        |         | Sample ID |       |        | Kingdom | phylum | class    | order          | family         | taxonomic classification of representative rOTU cluster | genus               | species          |                           |
|-------|-----------------|--------|---------|-----------|-------|--------|---------|--------|----------|----------------|----------------|---------------------------------------------------------|---------------------|------------------|---------------------------|
|       | UR_PMA          | CO_PMA | CRS_PMA | CRS_PMA   | UR    | CO_CRS |         |        |          |                |                |                                                         |                     |                  |                           |
| 39926 | 8677            | 9470   | 6668    | 7907      | 11920 | 13359  | 12353   | 12904  | Bacteria | Actinobacteria | Actinobacteria | Actinomycetales                                         | Geodermatophilaceae | Geodermatophilus | unclassified              |
| 40055 | 9147            | 6733   |         | 8076      | 11400 | 12365  | 12149   | 11890  | Bacteria | Actinobacteria | Actinobacteria | Actinomycetales                                         | Geodermatophilaceae | Geodermatophilus | unclassified              |
| 40076 | 8548            | 9240   | 6355    | 7726      | 12011 | 13283  | 12416   | 13114  | Bacteria | Actinobacteria | Actinobacteria | Actinomycetales                                         | Geodermatophilaceae | Geodermatophilus | unclassified              |
| 38640 | 8545            | 9373   | 6839    | 7607      | 11385 | 13368  | 12574   | 12811  | Bacteria | Actinobacteria | Actinobacteria | Actinomycetales                                         | Geodermatophilaceae | unclassified     | unclassified              |
| 39558 | 8981            | 9545   | 6635    | 7828      | 11778 | 12953  | 12064   | 12143  | Bacteria | Actinobacteria | Actinobacteria | Actinomycetales                                         | Geodermatophilaceae | unclassified     | unclassified              |
| 39644 | 10098           | 9565   | 8330    | 8386      | 11862 | 13038  | 12232   | 12934  | Bacteria | Actinobacteria | Actinobacteria | Actinomycetales                                         | Geodermatophilaceae | unclassified     | unclassified              |
| 39651 | 9178            | 9795   | 8627    | 8966      | 11689 | 13087  | 11733   | 12344  | Bacteria | Actinobacteria | Actinobacteria | Actinomycetales                                         | Geodermatophilaceae | unclassified     | unclassified              |
| 39852 | 9325            | 9657   | 7212    | 8004      | 11139 | 12714  | 11667   | 12063  | Bacteria | Actinobacteria | Actinobacteria | Actinomycetales                                         | Geodermatophilaceae | unclassified     | unclassified              |
| 39910 | 8901            | 9943   | 6252    | 7683      | 12474 | 13699  | 12849   | 13254  | Bacteria | Actinobacteria | Actinobacteria | Actinomycetales                                         | Geodermatophilaceae | unclassified     | unclassified              |
| 40039 | 8788            | 9882   | 6593    | 7390      | 11204 | 12818  | 11264   | 11997  | Bacteria | Actinobacteria | Actinobacteria | Actinomycetales                                         | Geodermatophilaceae | unclassified     | unclassified              |
| 38103 | 8430            | 7158   | 5985    | 6638      | 11522 | 12355  | 11568   | 12203  | Bacteria | Actinobacteria | Actinobacteria | Actinomycetales                                         | Gordoniaceae        | Gordonia         | Gordonia amarae           |
| 37449 | 8684            | 6898   | 6211    | 6704      | 11934 | 12427  | 11701   | 12985  | Bacteria | Actinobacteria | Actinobacteria | Actinomycetales                                         | Gordoniaceae        | Gordonia         | unclassified              |
| 37622 | 8578            | 8788   | 6535    | 7111      | 12097 | 12740  | 12256   | 12921  | Bacteria | Actinobacteria | Actinobacteria | Actinomycetales                                         | Gordoniaceae        | Gordonia         | unclassified              |
| 37653 | 9256            | 9778   | 6482    | 7245      | 12568 | 12889  | 12725   | 13348  | Bacteria | Actinobacteria | Actinobacteria | Actinomycetales                                         | Gordoniaceae        | Gordonia         | unclassified              |
| 38270 | 8692            | 7385   | 5960    | 6674      | 11709 | 12556  | 11731   | 12408  | Bacteria | Actinobacteria | Actinobacteria | Actinomycetales                                         | Gordoniaceae        | Gordonia         | unclassified              |
| 40856 | 10315           | 10414  | 7345    | 8071      | 12192 | 12911  | 12312   | 12478  | Bacteria | Actinobacteria | Actinobacteria | Actinomycetales                                         | Intrasporangiaceae  | Janibacter       | unclassified              |
| 40578 | 8961            | 9450   | 7068    | 7207      | 13092 | 13703  | 12989   | 13781  | Bacteria | Actinobacteria | Actinobacteria | Actinomycetales                                         | Intrasporangiaceae  | Knoellia         | Knoellia subterranea      |
| 40785 | 8799            | 10308  | 6710    | 6698      | 12410 | 13429  | 12417   | 12571  | Bacteria | Actinobacteria | Actinobacteria | Actinomycetales                                         | Intrasporangiaceae  | Knoellia         | Knoellia subterranea      |
| 40505 | 11777           | 12149  | 10898   | 10109     | 12724 | 13513  | 12574   | 12998  | Bacteria | Actinobacteria | Actinobacteria | Actinomycetales                                         | Intrasporangiaceae  | unclassified     | unclassified              |
| 40529 | 8525            | 9165   | 6384    | 6776      | 11789 | 12719  | 11969   | 12686  | Bacteria | Actinobacteria | Actinobacteria | Actinomycetales                                         | Intrasporangiaceae  | unclassified     | unclassified              |
| 40629 | 9280            | 10761  | 9164    | 7948      | 11853 | 12881  | 11934   | 12240  | Bacteria | Actinobacteria | Actinobacteria | Actinomycetales                                         | Intrasporangiaceae  | unclassified     | unclassified              |
| 40716 | 10211           | 9823   | 7438    | 6904      | 13215 | 13315  | 13088   | 13168  | Bacteria | Actinobacteria | Actinobacteria | Actinomycetales                                         | Intrasporangiaceae  | unclassified     | unclassified              |
| 40749 | 10451           | 11627  | 8217    | 8053      | 12839 | 13506  | 12739   | 13192  | Bacteria | Actinobacteria | Actinobacteria | Actinomycetales                                         | Intrasporangiaceae  | unclassified     | unclassified              |
| 40976 | 10596           | 11138  | 9864    | 9452      | 13052 | 13653  | 12916   | 13355  | Bacteria | Actinobacteria | Actinobacteria | Actinomycetales                                         | Intrasporangiaceae  | unclassified     | unclassified              |
| 40984 | 9381            | 8288   | 6327    | 6810      | 12019 | 12650  | 11746   | 12263  | Bacteria | Actinobacteria | Actinobacteria | Actinomycetales                                         | Intrasporangiaceae  | unclassified     | unclassified              |
| 41001 | 9985            | 10113  | 8600    | 9210      | 12103 | 12814  | 11913   | 12151  | Bacteria | Actinobacteria | Actinobacteria | Actinomycetales                                         | Intrasporangiaceae  | unclassified     | unclassified              |
| 41094 | 9973            | 9979   | 8746    | 9146      | 12261 | 13048  | 12010   | 12379  | Bacteria | Actinobacteria | Actinobacteria | Actinomycetales                                         | Intrasporangiaceae  | unclassified     | unclassified              |
| 41078 | 9003            | 10024  | 7025    | 7807      | 11403 | 12782  | 11811   | 11846  | Bacteria | Actinobacteria | Actinobacteria | Actinomycetales                                         | Intrasporangiaceae  | unclassified     | unclassified              |
| 37917 | 8363            | 8707   | 6225    | 6674      | 10042 | 12018  | 11601   | 11897  | Bacteria | Actinobacteria | Actinobacteria | Actinomycetales                                         | Kineosporiaceae     | Kineococcus      | Kineococcus radiotolerans |
| 37763 | 8425            | 8342   | 6163    | 6380      | 12031 | 12835  | 12655   | 12610  | Bacteria | Actinobacteria | Actinobacteria | Actinomycetales                                         | Kineosporiaceae     | Kineococcus      | unclassified              |
| 37881 | 8911            | 10936  | 6506    | 6950      | 12552 | 13319  | 12797   | 13071  | Bacteria | Actinobacteria | Actinobacteria | Actinomycetales                                         | Kineosporiaceae     | Kineococcus      | unclassified              |
| 37566 | 10388           | 12054  | 8459    | 8453      | 13224 | 13933  | 13287   | 13657  | Bacteria | Actinobacteria | Actinobacteria | Actinomycetales                                         | Kineosporiaceae     | unclassified     | unclassified              |
| 37920 | 8948            | 10213  | 6484    | 7663      | 11824 | 12998  | 11868   | 12410  | Bacteria | Actinobacteria | Actinobacteria | Actinomycetales                                         | Kineosporiaceae     | unclassified     | unclassified              |
| 38083 | 10566           | 10668  | 8842    | 9048      | 12968 | 13688  | 11142   | 11603  | Bacteria | Actinobacteria | Actinobacteria | Actinomycetales                                         | Kineosporiaceae     | unclassified     | unclassified              |
| 41978 | 11147           | 11454  | 11047   | 10367     | 12586 | 13243  | 12935   | 12764  | Bacteria | Actinobacteria | Actinobacteria | Actinomycetales                                         | Microbacteriaceae   | Agria            | unclassified              |
| 42208 | 8979            | 9061   | 7040    | 7484      | 11580 | 12964  | 11811   | 11820  | Bacteria | Actinobacteria | Actinobacteria | Actinomycetales                                         | Microbacteriaceae   | Agria            | unclassified              |
| 41369 | 8667            | 8586   | 6478    | 7878      | 11339 | 12796  | 11423   | 11329  | Bacteria | Actinobacteria | Actinobacteria | Actinomycetales                                         | Microbacteriaceae   | Agrococcus       | Agrococcus jenensis       |
| 38524 | 10551           | 11242  | 10241   | 8977      | 12347 | 13162  | 12749   | 12606  | Bacteria | Actinobacteria | Actinobacteria | Actinomycetales                                         | Microbacteriaceae   | Agromyces        | unclassified              |
| 38721 | 9073            | 10058  | 8002    | 7541      | 11395 | 12670  | 11983   | 12204  | Bacteria | Actinobacteria | Actinobacteria | Actinomycetales                                         | Microbacteriaceae   | Agromyces        | unclassified              |
| 38848 | 9779            | 10226  | 7193    | 6995      | 11846 | 12958  | 12301   | 12312  | Bacteria | Actinobacteria | Actinobacteria | Actinomycetales                                         | Microbacteriaceae   | Agromyces        | unclassified              |
| 39094 | 8989            | 8077   | 6028    | 7020      | 10034 | 11728  | 11410   | 10749  | Bacteria | Actinobacteria | Actinobacteria | Actinomycetales                                         | Microbacteriaceae   | Agromyces        | unclassified              |
| 39275 | 10300           | 9575   | 8450    | 8610      | 12083 | 12891  | 12125   | 12445  | Bacteria | Actinobacteria | Actinobacteria | Actinomycetales                                         | Microbacteriaceae   | Agromyces        | unclassified              |
| 39242 | 8354            | 9821   | 6501    | 7633      | 10949 | 12308  | 11683   | 11565  | Bacteria | Actinobacteria | Actinobacteria | Actinomycetales                                         | Microbacteriaceae   | Agromyces        | unclassified              |
| 39259 | 8384            | 9764   | 6873    | 7405      | 11877 | 12830  | 12417   | 12308  | Bacteria | Actinobacteria | Actinobacteria | Actinomycetales                                         | Microbacteriaceae   | Agromyces        | unclassified              |
| 39733 | 11474           | 12133  | 11274   | 9747      | 13069 | 13728  | 13228   | 13556  | Bacteria | Actinobacteria | Actinobacteria | Actinomycetales                                         | Microbacteriaceae   | Agromyces        | unclassified              |
| 40014 | 8107            | 7690   | 6417    | 7340      | 10969 | 12335  | 11752   | 11657  | Bacteria | Actinobacteria | Actinobacteria | Actinomycetales                                         | Microbacteriaceae   | Agromyces        | unclassified              |
| 40067 | 9216            | 9229   | 6992    | 7356      | 11937 | 12822  | 12229   | 12487  | Bacteria | Actinobacteria | Actinobacteria | Actinomycetales                                         | Microbacteriaceae   | Agromyces        | unclassified              |
| 41399 | 9273            | 9839   | 6764    | 8601      | 12631 | 13271  | 11971   | 12322  | Bacteria | Actinobacteria | Actinobacteria | Actinomycetales                                         | Microbacteriaceae   | unclassified     | unclassified              |
| 41760 | 9272            | 10112  | 7458    | 7658      | 11532 | 12136  | 11746   | 12460  | Bacteria | Actinobacteria | Actinobacteria | Actinomycetales                                         | Microbacteriaceae   | Leucobacter      | unclassified              |
| 41938 | 9230            | 9072   | 7399    | 7321      | 11737 | 12899  | 11906   | 12119  | Bacteria | Actinobacteria | Actinobacteria | Actinomycetales                                         | Microbacteriaceae   | Leucobacter      | unclassified              |
| 41964 | 9384            | 10408  | 9250    | 8121      | 11688 | 12933  | 12112   | 11931  | Bacteria | Actinobacteria | Actinobacteria | Actinomycetales                                         | Microbacteriaceae   | Microbacterium   | Microbacterium aurum      |
| 42310 | 9507            | 11462  | 10061   | 8752      | 11820 | 13184  | 12394   | 12286  | Bacteria | Actinobacteria | Actinobacteria | Actinomycetales                                         | Microbacteriaceae   | Microbacterium   | Microbacterium aurum      |
| 41088 | 8766            | 7539   | 6413    | 7846      | 11887 | 12693  | 12149   | 12480  | Bacteria | Actinobacteria | Actinobacteria | Actinomycetales                                         | Microbacteriaceae   | Microbacterium   | unclassified              |
| 41101 | 9239            | 9091   | 6764    | 8765      | 12384 | 12812  | 12521   | 12563  | Bacteria | Actinobacteria | Actinobacteria | Actinomycetales                                         | Microbacteriaceae   | Microbacterium   | unclassified              |
| 41123 | 9232            | 10016  | 6975    | 8796      | 12709 | 13359  | 12742   | 13279  | Bacteria | Actinobacteria | Actinobacteria | Actinomycetales                                         | Microbacteriaceae   | Microbacterium   | unclassified              |
| 41163 | 8752            | 8817   | 7115    | 9917      | 10653 | 11808  | 11306   | 11242  | Bacteria | Actinobacteria | Actinobacteria | Actinomycetales                                         | Microbacteriaceae   | Microbacterium   | unclassified              |
| 41171 | 9150            | 9222   | 6439    | 8770      | 12356 | 13097  | 12264   | 12454  | Bacteria | Actinobacteria | Actinobacteria | Actinomycetales                                         | Microbacteriaceae   | Microbacterium   | unclassified              |
| 41275 | 9006            | 8394   | 6478    | 7703      | 12339 | 13107  | 12462   | 12654  | Bacteria | Actinobacteria | Actinobacteria | Actinomycetales                                         | Microbacteriaceae   | Microbacterium   | unclassified              |
| 41284 | 8737            | 7473   | 6311    | 7456      | 12041 | 12914  | 12197   | 12408  | Bacteria | Actinobacteria | Actinobacteria | Actinomycetales                                         | Microbacteriaceae   | Microbacterium   | unclassified              |
| 41293 | 9911            | 10006  | 6768    | 9887      | 12939 | 13671  | 12766   | 13291  | Bacteria | Actinobacteria | Actinobacteria | Actinomycetales                                         | Microbacteriaceae   | Microbacterium   | unclassified              |
| 41373 | 9703            | 8456   | 7615    | 8810      | 12008 | 12499  | 12181   | 12255  | Bacteria | Actinobacteria | Actinobacteria | Actinomycetales                                         | Microbacteriaceae   | Microbacterium   | unclassified              |
| 41466 | 8819            | 11386  | 8679    | 9191      | 12658 | 13421  | 13227   | 12877  | Bacteria | Actinobacteria | Actinobacteria | Actinomycetales                                         | Microbacteriaceae   | Microbacterium   | unclassified              |
| 41460 | 8844            | 8435   | 6398    | 8440      | 12011 | 12938  | 11969   | 12873  | Bacteria | Actinobacteria | Actinobacteria | Actinomycetales                                         | Microbacteriaceae   | Microbacterium   | unclassified              |
| 41462 | 9339            | 8538   | 7273    | 8126      | 12245 | 12884  | 12209   | 12615  | Bacteria | Actinobacteria | Actinobacteria | Actinomycetales                                         | Microbacteriaceae   | Microbacterium   | unclassified              |
| 41474 | 9086            | 8147   | 6746    | 7729      | 11920 | 12859  | 12045   | 12364  | Bacteria | Actinobacteria | Actinobacteria | Actinomycetales                                         | Microbacteriaceae   | Microbacterium   | unclassified              |
| 41491 | 9159            | 7907   | 6153    | 8181      | 12018 | 13095  | 12175   | 12087  | Bacteria | Actinobacteria | Actinobacteria | Actinomycetales                                         | Microbacteriaceae   | Microbacterium   | unclassified              |
| 41493 | 9459            | 6839   | 6752    | 7514      | 11961 | 12639  | 11861   | 11925  | Bacteria | Actinobacteria | Actinobacteria | Actinomycetales                                         | Microbacteriaceae   | Microbacterium   | unclassified              |
| 41499 | 8907            | 7442   | 6635    | 7747      | 11886 | 12584  | 11922   | 12405  | Bacteria | Actinobacteria | Actinobacteria | Actinomycetales                                         | Microbacteriaceae   | Microbacterium   | unclassified              |
| 41517 | 9716            |        |         |           |       |        |         |        |          |                |                |                                                         |                     |                  |                           |

Table S6 (part E): Hy5Scores of OTUs that were called present in at least one of the samples. Taxonomic classifications are based on PhyloChip taxonomy (derived from GreenGenes). Please note, that data presented here was rank normalized before performing statistical analyses presented in the manuscript.

| OTU   | Sample ID (PMA) |        |         | Sample ID |       |       | kingdom | phylum | class    | order          | family         | taxonomic classification of representative rOTU cluster | genus             | species      |                     |
|-------|-----------------|--------|---------|-----------|-------|-------|---------|--------|----------|----------------|----------------|---------------------------------------------------------|-------------------|--------------|---------------------|
|       | OTU_PMA         | CO_PMA | CRS_PMA | UR        | CO    | CRS   |         |        |          |                |                |                                                         |                   |              |                     |
| 41444 | 8522            | 9025   | 6893    | 7671      | 11110 | 11725 | 11325   | 11303  | Bacteria | Actinobacteria | Actinobacteria | Actinomycetales                                         | Microbacteriaceae | unclassified | unclassified        |
| 41480 | 9200            | 9070   | 7343    | 8057      | 11209 | 12687 | 11590   | 11955  | Bacteria | Actinobacteria | Actinobacteria | Actinomycetales                                         | Microbacteriaceae | unclassified | unclassified        |
| 41730 | 8591            | 10335  | 6117    | 7304      | 11087 | 12500 | 11327   | 11791  | Bacteria | Actinobacteria | Actinobacteria | Actinomycetales                                         | Microbacteriaceae | unclassified | unclassified        |
| 41779 | 9049            | 6777   | 7067    | 7067      | 10445 | 12176 | 10693   | 11016  | Bacteria | Actinobacteria | Actinobacteria | Actinomycetales                                         | Microbacteriaceae | unclassified | unclassified        |
| 41868 | 11588           | 12025  | 12185   | 11007     | 12493 | 12853 | 12551   | 12981  | Bacteria | Actinobacteria | Actinobacteria | Actinomycetales                                         | Microbacteriaceae | unclassified | unclassified        |
| 41925 | 8606            | 9455   | 6400    | 7235      | 11196 | 12951 | 11878   | 12129  | Bacteria | Actinobacteria | Actinobacteria | Actinomycetales                                         | Microbacteriaceae | unclassified | unclassified        |
| 41931 | 1720            | 8337   | 6202    | 6568      | 10221 | 13177 | 10714   | 10617  | Bacteria | Actinobacteria | Actinobacteria | Actinomycetales                                         | Microbacteriaceae | unclassified | unclassified        |
| 42358 | 8942            | 8759   | 7556    | 7977      | 11300 | 12512 | 11757   | 11849  | Bacteria | Actinobacteria | Actinobacteria | Actinomycetales                                         | Microbacteriaceae | unclassified | unclassified        |
| 40920 | 9154            | 7045   | 6152    | 7086      | 11493 | 12285 | 11923   | 12006  | Bacteria | Actinobacteria | Actinobacteria | Actinomycetales                                         | Micrococcaeae     | Arthrobacter | Arthrobacter agilis |
| 40152 | 10253           | 9786   | 6218    | 8973      | 11922 | 12855 | 12150   | 12749  | Bacteria | Actinobacteria | Actinobacteria | Actinomycetales                                         | Micrococcaeae     | Arthrobacter | unclassified        |
| 40172 | 10311           | 9804   | 6421    | 8842      | 12318 | 12583 | 12588   | 12651  | Bacteria | Actinobacteria | Actinobacteria | Actinomycetales                                         | Micrococcaeae     | Arthrobacter | unclassified        |
| 40175 | 8770            | 9218   | 6608    | 7603      | 11922 | 13012 | 12534   | 12334  | Bacteria | Actinobacteria | Actinobacteria | Actinomycetales                                         | Micrococcaeae     | Arthrobacter | unclassified        |
| 40191 | 9698            | 10700  | 7050    | 9185      | 12525 | 13438 | 12768   | 12843  | Bacteria | Actinobacteria | Actinobacteria | Actinomycetales                                         | Micrococcaeae     | Arthrobacter | unclassified        |
| 40199 | 9779            | 9699   | 6601    | 7886      | 12083 | 12652 | 12404   | 12353  | Bacteria | Actinobacteria | Actinobacteria | Actinomycetales                                         | Micrococcaeae     | Arthrobacter | unclassified        |
| 40206 | 8530            | 7937   | 6264    | 7114      | 12154 | 13049 | 11579   | 12170  | Bacteria | Actinobacteria | Actinobacteria | Actinomycetales                                         | Micrococcaeae     | Arthrobacter | unclassified        |
| 40209 | 11555           | 11628  | 11219   | 10530     | 12993 | 13397 | 12860   | 13331  | Bacteria | Actinobacteria | Actinobacteria | Actinomycetales                                         | Micrococcaeae     | Arthrobacter | unclassified        |
| 40216 | 10894           | 11266  | 6864    | 8333      | 13714 | 13979 | 13904   | 14071  | Bacteria | Actinobacteria | Actinobacteria | Actinomycetales                                         | Micrococcaeae     | Arthrobacter | unclassified        |
| 40224 | 10332           | 8454   | 6517    | 7587      | 12319 | 13167 | 12303   | 13064  | Bacteria | Actinobacteria | Actinobacteria | Actinomycetales                                         | Micrococcaeae     | Arthrobacter | unclassified        |
| 40234 | 7801            | 10224  | 6663    | 7469      | 10946 | 12052 | 11182   | 11540  | Bacteria | Actinobacteria | Actinobacteria | Actinomycetales                                         | Micrococcaeae     | Arthrobacter | unclassified        |
| 40245 | 10159           | 9668   | 7113    | 8483      | 11259 | 13658 | 13229   | 13293  | Bacteria | Actinobacteria | Actinobacteria | Actinomycetales                                         | Micrococcaeae     | Arthrobacter | unclassified        |
| 40253 | 10158           | 9653   | 6866    | 7853      | 12478 | 12919 | 12869   | 12837  | Bacteria | Actinobacteria | Actinobacteria | Actinomycetales                                         | Micrococcaeae     | Arthrobacter | unclassified        |
| 40303 | 9762            | 9809   | 6965    | 7371      | 13128 | 13136 | 13204   | 13255  | Bacteria | Actinobacteria | Actinobacteria | Actinomycetales                                         | Micrococcaeae     | Arthrobacter | unclassified        |
| 40304 | 9518            | 8906   | 6968    | 7580      | 12020 | 12386 | 12237   | 13035  | Bacteria | Actinobacteria | Actinobacteria | Actinomycetales                                         | Micrococcaeae     | Arthrobacter | unclassified        |
| 40337 | 8651            | 10030  | 6344    | 7526      | 12119 | 12800 | 12232   | 12401  | Bacteria | Actinobacteria | Actinobacteria | Actinomycetales                                         | Micrococcaeae     | Arthrobacter | unclassified        |
| 40340 | 9108            | 9666   | 6868    | 7167      | 12335 | 13154 | 12436   | 13119  | Bacteria | Actinobacteria | Actinobacteria | Actinomycetales                                         | Micrococcaeae     | Arthrobacter | unclassified        |
| 40358 | 9819            | 11132  | 7732    | 8129      | 12460 | 13445 | 12899   | 12859  | Bacteria | Actinobacteria | Actinobacteria | Actinomycetales                                         | Micrococcaeae     | Arthrobacter | unclassified        |
| 40362 | 9164            | 9750   | 6463    | 8162      | 12194 | 12976 | 12136   | 12178  | Bacteria | Actinobacteria | Actinobacteria | Actinomycetales                                         | Micrococcaeae     | Arthrobacter | unclassified        |
| 40394 | 11991           | 12618  | 6093    | 8908      | 12652 | 14234 | 14248   | 14379  | Bacteria | Actinobacteria | Actinobacteria | Actinomycetales                                         | Micrococcaeae     | Arthrobacter | unclassified        |
| 40413 | 9231            | 7824   | 6361    | 7007      | 11215 | 12119 | 12134   | 11565  | Bacteria | Actinobacteria | Actinobacteria | Actinomycetales                                         | Micrococcaeae     | Arthrobacter | unclassified        |
| 40415 | 9449            | 9669   | 6751    | 7770      | 11982 | 12577 | 12120   | 12432  | Bacteria | Actinobacteria | Actinobacteria | Actinomycetales                                         | Micrococcaeae     | Arthrobacter | unclassified        |
| 40416 | 8465            | 9048   | 7276    | 7465      | 11532 | 11994 | 11786   | 12230  | Bacteria | Actinobacteria | Actinobacteria | Actinomycetales                                         | Micrococcaeae     | Arthrobacter | unclassified        |
| 40425 | 8733            | 8754   | 6698    | 7430      | 12380 | 12900 | 12259   | 12119  | Bacteria | Actinobacteria | Actinobacteria | Actinomycetales                                         | Micrococcaeae     | Arthrobacter | unclassified        |
| 40427 | 9300            | 8367   | 7679    | 8022      | 11882 | 12109 | 11713   | 11620  | Bacteria | Actinobacteria | Actinobacteria | Actinomycetales                                         | Micrococcaeae     | Arthrobacter | unclassified        |
| 40451 | 8852            | 9198   | 6198    | 7948      | 11259 | 13024 | 11912   | 12709  | Bacteria | Actinobacteria | Actinobacteria | Actinomycetales                                         | Micrococcaeae     | Arthrobacter | unclassified        |
| 40474 | 9985            | 7069   | 7237    | 7347      | 13436 | 13264 | 13382   | 13425  | Bacteria | Actinobacteria | Actinobacteria | Actinomycetales                                         | Micrococcaeae     | Arthrobacter | unclassified        |
| 40486 | 9874            | 9278   | 6137    | 8768      | 11219 | 12465 | 11654   | 11466  | Bacteria | Actinobacteria | Actinobacteria | Actinomycetales                                         | Micrococcaeae     | Arthrobacter | unclassified        |
| 40488 | 9985            | 10443  | 8602    | 9456      | 12620 | 13223 | 12326   | 12444  | Bacteria | Actinobacteria | Actinobacteria | Actinomycetales                                         | Micrococcaeae     | Arthrobacter | unclassified        |
| 40495 | 8812            | 9929   | 6045    | 7012      | 12278 | 13011 | 12214   | 12244  | Bacteria | Actinobacteria | Actinobacteria | Actinomycetales                                         | Micrococcaeae     | Arthrobacter | unclassified        |
| 40503 | 9264            | 8989   | 7248    | 7615      | 11475 | 12523 | 11724   | 12034  | Bacteria | Actinobacteria | Actinobacteria | Actinomycetales                                         | Micrococcaeae     | Arthrobacter | unclassified        |
| 40512 | 9969            | 9619   | 7415    | 8496      | 12956 | 13181 | 12992   | 13124  | Bacteria | Actinobacteria | Actinobacteria | Actinomycetales                                         | Micrococcaeae     | Arthrobacter | unclassified        |
| 40512 | 10461           | 9469   | 6463    | 8190      | 12044 | 12893 | 11985   | 12516  | Bacteria | Actinobacteria | Actinobacteria | Actinomycetales                                         | Micrococcaeae     | Arthrobacter | unclassified        |
| 40526 | 9615            | 9615   | 8133    | 8521      | 12059 | 12538 | 12074   | 12275  | Bacteria | Actinobacteria | Actinobacteria | Actinomycetales                                         | Micrococcaeae     | Arthrobacter | unclassified        |
| 40535 | 8504            | 8212   | 6517    | 7651      | 11083 | 12662 | 11271   | 12383  | Bacteria | Actinobacteria | Actinobacteria | Actinomycetales                                         | Micrococcaeae     | Arthrobacter | unclassified        |
| 40558 | 8530            | 7693   | 5698    | 7008      | 12318 | 12871 | 11826   | 11822  | Bacteria | Actinobacteria | Actinobacteria | Actinomycetales                                         | Micrococcaeae     | Arthrobacter | unclassified        |
| 40568 | 9176            | 8515   | 6575    | 7383      | 12485 | 12966 | 12341   | 12192  | Bacteria | Actinobacteria | Actinobacteria | Actinomycetales                                         | Micrococcaeae     | Arthrobacter | unclassified        |
| 40577 | 10230           | 11403  | 7815    | 8595      | 12467 | 13149 | 12514   | 12978  | Bacteria | Actinobacteria | Actinobacteria | Actinomycetales                                         | Micrococcaeae     | Arthrobacter | unclassified        |
| 40583 | 8651            | 10030  | 6355    | 7281      | 12119 | 12800 | 12232   | 12401  | Bacteria | Actinobacteria | Actinobacteria | Actinomycetales                                         | Micrococcaeae     | Arthrobacter | unclassified        |
| 40586 | 10694           | 10786  | 6463    | 8190      | 12044 | 12893 | 11985   | 12516  | Bacteria | Actinobacteria | Actinobacteria | Actinomycetales                                         | Micrococcaeae     | Arthrobacter | unclassified        |
| 40587 | 10024           | 9554   | 8151    | 8750      | 12178 | 12477 | 12379   | 12452  | Bacteria | Actinobacteria | Actinobacteria | Actinomycetales                                         | Micrococcaeae     | Arthrobacter | unclassified        |
| 40610 | 9498            | 9674   | 6474    | 7681      | 12786 | 13336 | 12889   | 13139  | Bacteria | Actinobacteria | Actinobacteria | Actinomycetales                                         | Micrococcaeae     | Arthrobacter | unclassified        |
| 40620 | 10045           | 9661   | 6885    | 7775      | 12292 | 12776 | 12702   | 12684  | Bacteria | Actinobacteria | Actinobacteria | Actinomycetales                                         | Micrococcaeae     | Arthrobacter | unclassified        |
| 40639 | 9175            | 9750   | 7963    | 8147      | 12493 | 12950 | 12466   | 12828  | Bacteria | Actinobacteria | Actinobacteria | Actinomycetales                                         | Micrococcaeae     | Arthrobacter | unclassified        |
| 40666 | 10960           | 10608  | 10665   | 10637     | 12367 | 12936 | 12407   | 12574  | Bacteria | Actinobacteria | Actinobacteria | Actinomycetales                                         | Micrococcaeae     | Arthrobacter | unclassified        |
| 40676 | 8841            | 9931   | 7176    | 7675      | 12198 | 12936 | 12688   | 13104  | Bacteria | Actinobacteria | Actinobacteria | Actinomycetales                                         | Micrococcaeae     | Arthrobacter | unclassified        |
| 40678 | 1295            | 9786   | 6136    | 7218      | 12318 | 13027 | 11985   | 12516  | Bacteria | Actinobacteria | Actinobacteria | Actinomycetales                                         | Micrococcaeae     | Arthrobacter | unclassified        |
| 40723 | 10742           | 12402  | 9889    | 10283     | 13314 | 13811 | 13309   | 12523  | Bacteria | Actinobacteria | Actinobacteria | Actinomycetales                                         | Micrococcaeae     | Arthrobacter | unclassified        |
| 40741 | 9105            | 8794   | 6569    | 7267      | 12699 | 13149 | 12561   | 12420  | Bacteria | Actinobacteria | Actinobacteria | Actinomycetales                                         | Micrococcaeae     | Arthrobacter | unclassified        |
| 40778 | 9978            | 10064  | 6642    | 7206      | 13000 | 13421 | 12967   | 13085  | Bacteria | Actinobacteria | Actinobacteria | Actinomycetales                                         | Micrococcaeae     | Arthrobacter | unclassified        |
| 40797 | 8436            | 9551   | 6463    | 7325      | 11561 | 12552 | 11801   | 11732  | Bacteria | Actinobacteria | Actinobacteria | Actinomycetales                                         | Micrococcaeae     | Arthrobacter | unclassified        |
| 40805 | 9897            | 9403   | 6628    | 7664      | 12189 | 12721 | 12442   | 12586  | Bacteria | Actinobacteria | Actinobacteria | Actinomycetales                                         | Micrococcaeae     | Arthrobacter | unclassified        |
| 40827 | 9236            | 7621   | 5966    | 6935      | 11299 | 12095 | 11832   | 11879  | Bacteria | Actinobacteria | Actinobacteria | Actinomycetales                                         | Micrococcaeae     | Arthrobacter | unclassified        |
| 40867 | 9661            | 9629   | 6198    | 8172      | 12473 | 13065 | 12527   | 12833  | Bacteria | Actinobacteria | Actinobacteria | Actinomycetales                                         | Micrococcaeae     | Arthrobacter | unclassified        |
| 40875 | 9113            | 7453   | 6368    | 8267      | 12479 | 13121 | 11935   | 12361  | Bacteria | Actinobacteria | Actinobacteria | Actinomycetales                                         | Micrococcaeae     | Arthrobacter | unclassified        |
| 40876 | 8136            | 10966  | 6355    | 8303      | 12844 | 13269 | 12794   | 13194  | Bacteria | Actinobacteria | Actinobacteria | Actinomycetales                                         | Micrococcaeae     | Arthrobacter | unclassified        |
| 40898 | 11361           | 12148  | 11295   | 8835      | 13027 | 13401 | 13189   | 13254  | Bacteria | Actinobacteria | Actinobacteria | Actinomycetales                                         | Micrococcaeae     | Arthrobacter | unclassified        |
| 40919 | 10307           | 10017  | 9773    | 9690      | 12176 | 12679 | 12271   | 12571  | Bacteria | Actinobacteria | Actinobacteria | Actinomycetales                                         | Micrococcaeae     | Arthrobacter | unclassified        |
| 40930 | 9382            | 9088   | 6495    | 7165      | 11866 | 12502 | 11834   | 12036  | Bacteria | Actinobacteria | Actinobacteria | Actinomycetales                                         | Micrococcaeae     | Arthrobacter | unclassified        |
| 40945 | 9603            | 10264  | 7190    | 8216      | 11910 | 12750 | 12183   | 12822  | Bacteria | Actinobacteria | Actinobacteria | Actinomycetales                                         | Micrococcaeae     | Arthrobacter | unclassified        |
| 40962 | 8796            | 8796</ |         |           |       |       |         |        |          |                |                |                                                         |                   |              |                     |

Table S6 (part F): Hy5Scores of OTUs that were called present in at least one of the samples. Taxonomic classifications are based on PhyloChip taxonomy (derived from GreenGenes). Please note, that data presented here was rank normalized before performing statistical analyses presented in the manuscript.

| OTU   | OTU_PMA | Sample ID (PMA) |         |         | Sample ID |       |       | kingdom | phylum   | class          | order          | family          | taxonomic classification of representative rOTU cluster |                   |                    | genus | species |
|-------|---------|-----------------|---------|---------|-----------|-------|-------|---------|----------|----------------|----------------|-----------------|---------------------------------------------------------|-------------------|--------------------|-------|---------|
|       |         | CO_PMA          | CRS_PMA | CRS_PMA | CO        | CRS   | CRS   |         |          |                |                |                 | Family                                                  |                   |                    |       |         |
| 40436 | 9781    | 9337            | 6308    | 7149    | 13243     | 13343 | 13747 | 13442   | Bacteria | Actinobacteria | Actinobacteria | Actinomycetales | Micrococcaceae                                          | Micrococcus       | Micrococcus luteus |       |         |
| 40476 | 9578    | 9811            | 8909    | 9227    | 12173     | 12786 | 12313 | 12622   | Bacteria | Actinobacteria | Actinobacteria | Actinomycetales | Micrococcaceae                                          | Micrococcus       | Micrococcus luteus |       |         |
| 40479 | 9755    | 9483            | 6490    | 7122    | 13164     | 13337 | 13822 | 13404   | Bacteria | Actinobacteria | Actinobacteria | Actinomycetales | Micrococcaceae                                          | Micrococcus       | Micrococcus luteus |       |         |
| 40484 | 9626    | 9895            | 7951    | 9070    | 12573     | 13006 | 13391 | 12738   | Bacteria | Actinobacteria | Actinobacteria | Actinomycetales | Micrococcaceae                                          | Micrococcus       | Micrococcus luteus |       |         |
| 40490 | 9429    | 10696           | 8019    | 9187    | 11625     | 12449 | 12489 | 12103   | Bacteria | Actinobacteria | Actinobacteria | Actinomycetales | Micrococcaceae                                          | Micrococcus       | Micrococcus luteus |       |         |
| 40510 | 9488    | 9637            | 7590    | 8681    | 12857     | 13234 | 13262 | 12888   | Bacteria | Actinobacteria | Actinobacteria | Actinomycetales | Micrococcaceae                                          | Micrococcus       | Micrococcus luteus |       |         |
| 40574 | 9213    | 8276            | 6469    | 7021    | 12647     | 12804 | 13112 | 12910   | Bacteria | Actinobacteria | Actinobacteria | Actinomycetales | Micrococcaceae                                          | Micrococcus       | Micrococcus luteus |       |         |
| 40575 | 9474    | 9322            | 6300    | 6927    | 13045     | 13213 | 13782 | 13270   | Bacteria | Actinobacteria | Actinobacteria | Actinomycetales | Micrococcaceae                                          | Micrococcus       | Micrococcus luteus |       |         |
| 40621 | 9530    | 8332            | 6121    | 6702    | 12777     | 12827 | 13596 | 13019   | Bacteria | Actinobacteria | Actinobacteria | Actinomycetales | Micrococcaceae                                          | Micrococcus       | Micrococcus luteus |       |         |
| 40640 | 8781    | 7382            | 6181    | 6710    | 12691     | 12805 | 13578 | 12827   | Bacteria | Actinobacteria | Actinobacteria | Actinomycetales | Micrococcaceae                                          | Micrococcus       | Micrococcus luteus |       |         |
| 40696 | 8766    | 8050            | 6273    | 6756    | 12558     | 12743 | 13520 | 12616   | Bacteria | Actinobacteria | Actinobacteria | Actinomycetales | Micrococcaceae                                          | Micrococcus       | Micrococcus luteus |       |         |
| 40697 | 8989    | 8841            | 6429    | 8169    | 12583     | 12803 | 13508 | 12676   | Bacteria | Actinobacteria | Actinobacteria | Actinomycetales | Micrococcaceae                                          | Micrococcus       | Micrococcus luteus |       |         |
| 40718 | 9746    | 9650            | 6415    | 7286    | 13336     | 13498 | 13778 | 13471   | Bacteria | Actinobacteria | Actinobacteria | Actinomycetales | Micrococcaceae                                          | Micrococcus       | Micrococcus luteus |       |         |
| 40740 | 9738    | 10099           | 8086    | 8077    | 12204     | 13354 | 13289 | 13059   | Bacteria | Actinobacteria | Actinobacteria | Actinomycetales | Micrococcaceae                                          | Micrococcus       | Micrococcus luteus |       |         |
| 40753 | 8926    | 10574           | 7083    | 7360    | 12129     | 12860 | 12678 | 12458   | Bacteria | Actinobacteria | Actinobacteria | Actinomycetales | Micrococcaceae                                          | Micrococcus       | Micrococcus luteus |       |         |
| 40757 | 9826    | 9432            | 6410    | 7183    | 12913     | 13000 | 13678 | 13147   | Bacteria | Actinobacteria | Actinobacteria | Actinomycetales | Micrococcaceae                                          | Micrococcus       | Micrococcus luteus |       |         |
| 40834 | 9139    | 9393            | 8072    | 9070    | 12200     | 12603 | 13167 | 13235   | Bacteria | Actinobacteria | Actinobacteria | Actinomycetales | Micrococcaceae                                          | Micrococcus       | Micrococcus luteus |       |         |
| 40861 | 8939    | 8798            | 6526    | 8247    | 12562     | 12831 | 13457 | 12621   | Bacteria | Actinobacteria | Actinobacteria | Actinomycetales | Micrococcaceae                                          | Micrococcus       | Micrococcus luteus |       |         |
| 40884 | 8839    | 7960            | 6096    | 6666    | 12720     | 12838 | 13634 | 12905   | Bacteria | Actinobacteria | Actinobacteria | Actinomycetales | Micrococcaceae                                          | Micrococcus       | Micrococcus luteus |       |         |
| 40911 | 9152    | 9703            | 8079    | 8979    | 12685     | 13162 | 13317 | 12746   | Bacteria | Actinobacteria | Actinobacteria | Actinomycetales | Micrococcaceae                                          | Micrococcus       | Micrococcus luteus |       |         |
| 40950 | 9534    | 9206            | 7401    | 8762    | 12499     | 12685 | 13391 | 12642   | Bacteria | Actinobacteria | Actinobacteria | Actinomycetales | Micrococcaceae                                          | Micrococcus       | Micrococcus luteus |       |         |
| 40992 | 9218    | 8994            | 6555    | 7008    | 12782     | 13047 | 13576 | 12926   | Bacteria | Actinobacteria | Actinobacteria | Actinomycetales | Micrococcaceae                                          | Micrococcus       | Micrococcus luteus |       |         |
| 41054 | 9766    | 9632            | 6468    | 7153    | 13266     | 13427 | 13829 | 13486   | Bacteria | Actinobacteria | Actinobacteria | Actinomycetales | Micrococcaceae                                          | Micrococcus       | Micrococcus luteus |       |         |
| 41061 | 9572    | 9359            | 6623    | 7194    | 13316     | 13512 | 13666 | 13432   | Bacteria | Actinobacteria | Actinobacteria | Actinomycetales | Micrococcaceae                                          | Micrococcus       | Micrococcus luteus |       |         |
| 40263 | 8160    | 9030            | 6422    | 7080    | 11933     | 12427 | 12674 | 12014   | Bacteria | Actinobacteria | Actinobacteria | Actinomycetales | Micrococcaceae                                          | Micrococcus       | unclassified       |       |         |
| 40376 | 8948    | 8642            | 6507    | 8221    | 12403     | 12750 | 13031 | 12696   | Bacteria | Actinobacteria | Actinobacteria | Actinomycetales | Micrococcaceae                                          | Micrococcus       | unclassified       |       |         |
| 41073 | 9712    | 11073           | 7163    | 8113    | 13316     | 13617 | 13453 | 13654   | Bacteria | Actinobacteria | Actinobacteria | Actinomycetales | Micrococcaceae                                          | Micrococcus       | unclassified       |       |         |
| 40673 | 9476    | 9823            | 7663    | 8123    | 12962     | 13076 | 13395 | 12975   | Bacteria | Actinobacteria | Actinobacteria | Actinomycetales | Micrococcaceae                                          | Micrococcus       | unclassified       |       |         |
| 40819 | 9125    | 9696            | 8121    | 9185    | 12356     | 12770 | 13297 | 12454   | Bacteria | Actinobacteria | Actinobacteria | Actinomycetales | Micrococcaceae                                          | Micrococcus       | unclassified       |       |         |
| 40889 | 8764    | 8080            | 6214    | 6661    | 12775     | 12951 | 13682 | 12903   | Bacteria | Actinobacteria | Actinobacteria | Actinomycetales | Micrococcaceae                                          | Micrococcus       | unclassified       |       |         |
| 40943 | 9709    | 10542           | 6290    | 8223    | 13117     | 13546 | 13404 | 13091   | Bacteria | Actinobacteria | Actinobacteria | Actinomycetales | Micrococcaceae                                          | Micrococcus       | unclassified       |       |         |
| 41105 | 8388    | 8113            | 6585    | 7402    | 11519     | 12675 | 11846 | 12145   | Bacteria | Actinobacteria | Actinobacteria | Actinomycetales | Micromonosporaceae                                      | Actinoplanes      | unclassified       |       |         |
| 41110 | 9007    | 9763            | 6988    | 7946    | 11099     | 12431 | 11589 | 11882   | Bacteria | Actinobacteria | Actinobacteria | Actinomycetales | Micromonosporaceae                                      | Actinoplanes      | unclassified       |       |         |
| 41199 | 9159    | 8414            | 6411    | 7481    | 11363     | 12681 | 11541 | 12446   | Bacteria | Actinobacteria | Actinobacteria | Actinomycetales | Micromonosporaceae                                      | Actinoplanes      | unclassified       |       |         |
| 41217 | 8800    | 8365            | 7345    | 8174    | 10881     | 11799 | 11038 | 11907   | Bacteria | Actinobacteria | Actinobacteria | Actinomycetales | Micromonosporaceae                                      | Actinoplanes      | unclassified       |       |         |
| 41371 | 8719    | 9867            | 6772    | 8061    | 11066     | 12494 | 11656 | 12099   | Bacteria | Actinobacteria | Actinobacteria | Actinomycetales | Micromonosporaceae                                      | Actinoplanes      | unclassified       |       |         |
| 41489 | 9331    | 9857            | 6762    | 6806    | 11303     | 12248 | 11918 | 11768   | Bacteria | Actinobacteria | Actinobacteria | Actinomycetales | Micromonosporaceae                                      | Actinoplanes      | unclassified       |       |         |
| 41636 | 8337    | 7819            | 6601    | 7674    | 11127     | 12480 | 11677 | 11839   | Bacteria | Actinobacteria | Actinobacteria | Actinomycetales | Micromonosporaceae                                      | Actinoplanes      | unclassified       |       |         |
| 41502 | 9263    | 9387            | 6943    | 7647    | 12528     | 13195 | 12580 | 12737   | Bacteria | Actinobacteria | Actinobacteria | Actinomycetales | Micromonosporaceae                                      | Dactylosporangium | unclassified       |       |         |
| 42075 | 9533    | 9410            | 7656    | 8740    | 11728     | 12617 | 11782 | 12780   | Bacteria | Actinobacteria | Actinobacteria | Actinomycetales | Micromonosporaceae                                      | Dactylosporangium | unclassified       |       |         |
| 42425 | 8999    | 9457            | 7417    | 7947    | 10977     | 12052 | 10916 | 11491   | Bacteria | Actinobacteria | Actinobacteria | Actinomycetales | Micromonosporaceae                                      | Dactylosporangium | unclassified       |       |         |
| 41204 | 10162   | 9729            | 8875    | 8868    | 12886     | 13822 | 12768 | 13300   | Bacteria | Actinobacteria | Actinobacteria | Actinomycetales | Micromonosporaceae                                      | unclassified      | unclassified       |       |         |
| 41253 | 10250   | 10380           | 7394    | 8830    | 11418     | 12749 | 11699 | 12238   | Bacteria | Actinobacteria | Actinobacteria | Actinomycetales | Micromonosporaceae                                      | unclassified      | unclassified       |       |         |
| 41272 | 9675    | 9207            | 8022    | 8650    | 11520     | 12983 | 11677 | 12436   | Bacteria | Actinobacteria | Actinobacteria | Actinomycetales | Micromonosporaceae                                      | unclassified      | unclassified       |       |         |
| 41368 | 9833    | 8642            | 6543    | 7344    | 11868     | 13035 | 12130 | 12732   | Bacteria | Actinobacteria | Actinobacteria | Actinomycetales | Micromonosporaceae                                      | unclassified      | unclassified       |       |         |
| 41770 | 9860    | 10264           | 7436    | 7478    | 12514     | 13138 | 12539 | 12958   | Bacteria | Actinobacteria | Actinobacteria | Actinomycetales | Micromonosporaceae                                      | unclassified      | unclassified       |       |         |
| 41900 | 9789    | 10047           | 6854    | 8169    | 11509     | 12876 | 12004 | 12147   | Bacteria | Actinobacteria | Actinobacteria | Actinomycetales | Micromonosporaceae                                      | unclassified      | unclassified       |       |         |
| 42004 | 10152   | 10029           | 6876    | 8623    | 12828     | 13712 | 12604 | 13001   | Bacteria | Actinobacteria | Actinobacteria | Actinomycetales | Micromonosporaceae                                      | unclassified      | unclassified       |       |         |
| 42357 | 9125    | 9075            | 6062    | 7708    | 12112     | 13057 | 12394 | 12657   | Bacteria | Actinobacteria | Actinobacteria | Actinomycetales | Micromonosporaceae                                      | unclassified      | unclassified       |       |         |
| 37403 | 9502    | 9361            | 7599    | 8423    | 11339     | 12184 | 12059 | 12092   | Bacteria | Actinobacteria | Actinobacteria | Actinomycetales | Mycobacteriaceae                                        | Mycobacterium     | unclassified       |       |         |
| 37630 | 9429    | 9781            | 8555    | 8664    | 11270     | 12109 | 11603 | 11721   | Bacteria | Actinobacteria | Actinobacteria | Actinomycetales | Mycobacteriaceae                                        | Mycobacterium     | unclassified       |       |         |
| 37688 | 9058    | 8232            | 7250    | 7560    | 12364     | 12943 | 12548 | 13196   | Bacteria | Actinobacteria | Actinobacteria | Actinomycetales | Mycobacteriaceae                                        | Mycobacterium     | unclassified       |       |         |
| 37726 | 10537   | 11407           | 9363    | 8985    | 13759     | 14209 | 13741 | 14145   | Bacteria | Actinobacteria | Actinobacteria | Actinomycetales | Mycobacteriaceae                                        | Mycobacterium     | unclassified       |       |         |
| 37737 | 9681    | 11300           | 8224    | 9086    | 12057     | 13233 | 12473 | 12680   | Bacteria | Actinobacteria | Actinobacteria | Actinomycetales | Mycobacteriaceae                                        | Mycobacterium     | unclassified       |       |         |
| 37907 | 8318    | 7851            | 7445    | 7567    | 11158     | 12242 | 12034 | 12047   | Bacteria | Actinobacteria | Actinobacteria | Actinomycetales | Mycobacteriaceae                                        | Mycobacterium     | unclassified       |       |         |
| 37943 | 8922    | 10781           | 9144    | 9224    | 11828     | 12881 | 12518 | 12373   | Bacteria | Actinobacteria | Actinobacteria | Actinomycetales | Mycobacteriaceae                                        | Mycobacterium     | unclassified       |       |         |
| 37955 | 8851    | 7886            | 7245    | 7877    | 10345     | 11882 | 11592 | 11367   | Bacteria | Actinobacteria | Actinobacteria | Actinomycetales | Mycobacteriaceae                                        | Mycobacterium     | unclassified       |       |         |
| 37984 | 8856    | 8790            | 6544    | 7929    | 11045     | 12725 | 11849 | 11860   | Bacteria | Actinobacteria | Actinobacteria | Actinomycetales | Mycobacteriaceae                                        | Mycobacterium     | unclassified       |       |         |
| 37996 | 8886    | 8211            | 6804    | 7409    | 12376     | 12980 | 12604 | 12979   | Bacteria | Actinobacteria | Actinobacteria | Actinomycetales | Mycobacteriaceae                                        | Mycobacterium     | unclassified       |       |         |
| 38001 | 10679   | 11219           | 8835    | 10552   | 12698     | 12709 | 13109 | 13150   | Bacteria | Actinobacteria | Actinobacteria | Actinomycetales | Mycobacteriaceae                                        | Mycobacterium     | unclassified       |       |         |
| 38115 | 8629    | 7906            | 6566    | 7144    | 12344     | 12451 | 12462 | 12366   | Bacteria | Actinobacteria | Actinobacteria | Actinomycetales | Mycobacteriaceae                                        | Mycobacterium     | unclassified       |       |         |
| 38168 | 9733    | 9206            | 6793    | 8503    | 12346     | 12878 | 12504 | 13441   | Bacteria | Actinobacteria | Actinobacteria | Actinomycetales | Mycobacteriaceae                                        | Mycobacterium     | unclassified       |       |         |
| 38218 | 8625    | 8194            | 7830    | 7889    | 10849     | 11738 | 11723 | 11611   | Bacteria | Actinobacteria | Actinobacteria | Actinomycetales | Mycobacteriaceae                                        | Mycobacterium     | unclassified       |       |         |
| 38248 | 9164    | 10642           | 8137    | 8811    | 11271     | 12888 | 11472 | 11539   | Bacteria | Actinobacteria | Actinobacteria | Actinomycetales | Mycobacteriaceae                                        | Mycobacterium     | unclassified       |       |         |
| 38371 | 9377    | 9910            | 7953    | 7601    | 11776     | 12267 | 12120 | 12203   | Bacteria | Actinobacteria | Actinobacteria | Actinomycetales | Mycobacteriaceae                                        | Mycobacterium     | unclassified       |       |         |
| 38427 | 9034    | 9151            | 7177    | 8085    | 11502     | 12989 | 11951 | 12063   | Bacteria | Actinobacteria | Actinobacteria | Actinomycetales | Mycobacteriaceae                                        | Mycobacterium     | unclassified       |       |         |
| 38438 | 8638    | 8502            | 7120    | 7315    | 11473     | 12416 | 12208 | 12016   | Bacteria | Actinobacteria | Actinobacteria | Actinomycetales | Mycobacteriaceae                                        | Mycobacterium     | unclassified       |       |         |
| 38444 |         |                 |         |         |           |       |       |         |          |                |                |                 |                                                         |                   |                    |       |         |

Table S6 (part G): Hy5Scores of OTUs that were called present in at least one of the samples. Taxonomic classifications are based on PhylChip taxonomy (derived from GreenGenes). Please note, that data presented here was rank normalized before performing statistical analyses presented in the manuscript.

| OTU   | Sample ID (PMA) |         |         |       | Sample ID |         |         |       | Kingdom  | phylum         | class          | order           | family               | taxonomic classification of representative rOTU cluster |                           |  |
|-------|-----------------|---------|---------|-------|-----------|---------|---------|-------|----------|----------------|----------------|-----------------|----------------------|---------------------------------------------------------|---------------------------|--|
|       | CO_PMA          | CRB_PMA | CRS_PMA | UR    | CO_CRS    | CRB_CRS | CRS_CRS | genus |          |                |                |                 |                      | family                                                  | species                   |  |
| 38628 | 9913            | 11619   | 6750    | 8026  | 12968     | 13477   | 13015   | 13179 | Bacteria | Actinobacteria | Actinobacteria | Actinomycetales | Nocardioidaceae      | Nocardioides                                            | unclassified              |  |
| 38646 | 10161           | 9318    | 9762    | 9513  | 12145     | 13082   | 12174   | 12389 | Bacteria | Actinobacteria | Actinobacteria | Actinomycetales | Nocardioidaceae      | Nocardioides                                            | unclassified              |  |
| 38679 | 9725            | 9059    | 7123    | 7192  | 13172     | 13485   | 13148   | 13169 | Bacteria | Actinobacteria | Actinobacteria | Actinomycetales | Nocardioidaceae      | Nocardioides                                            | unclassified              |  |
| 38746 | 9444            | 9180    | 5978    | 7293  | 12364     | 13184   | 12455   | 12279 | Bacteria | Actinobacteria | Actinobacteria | Actinomycetales | Nocardioidaceae      | Nocardioides                                            | unclassified              |  |
| 38920 | 9414            | 8673    | 6593    | 7931  | 12255     | 12946   | 12392   | 12216 | Bacteria | Actinobacteria | Actinobacteria | Actinomycetales | Nocardioidaceae      | Nocardioides                                            | unclassified              |  |
| 38958 | 9520            | 9342    | 6748    | 8126  | 12435     | 13215   | 12835   | 12625 | Bacteria | Actinobacteria | Actinobacteria | Actinomycetales | Nocardioidaceae      | Nocardioides                                            | unclassified              |  |
| 39018 | 10174           | 9909    | 7834    | 7121  | 12854     | 13654   | 13100   | 13100 | Bacteria | Actinobacteria | Actinobacteria | Actinomycetales | Nocardioidaceae      | Nocardioides                                            | unclassified              |  |
| 39027 | 10392           | 9655    | 7203    | 7155  | 12333     | 13170   | 13283   | 13571 | Bacteria | Actinobacteria | Actinobacteria | Actinomycetales | Nocardioidaceae      | Nocardioides                                            | unclassified              |  |
| 39081 | 9745            | 10141   | 8025    | 7879  | 13175     | 13791   | 13196   | 13511 | Bacteria | Actinobacteria | Actinobacteria | Actinomycetales | Nocardioidaceae      | Nocardioides                                            | unclassified              |  |
| 39446 | 10754           | 10822   | 7906    | 9571  | 12607     | 13143   | 12880   | 12907 | Bacteria | Actinobacteria | Actinobacteria | Actinomycetales | Nocardioidaceae      | Nocardioides                                            | unclassified              |  |
| 39559 | 10071           | 9199    | 6938    | 7399  | 12312     | 13245   | 12556   | 13023 | Bacteria | Actinobacteria | Actinobacteria | Actinomycetales | Nocardioidaceae      | Nocardioides                                            | unclassified              |  |
| 39646 | 8449            | 7893    | 6023    | 7044  | 9936      | 11672   | 11005   | 11103 | Bacteria | Actinobacteria | Actinobacteria | Actinomycetales | Nocardioidaceae      | Nocardioides                                            | unclassified              |  |
| 40042 | 10167           | 9462    | 6991    | 7530  | 13076     | 13654   | 13118   | 13083 | Bacteria | Actinobacteria | Actinobacteria | Actinomycetales | Nocardioidaceae      | Nocardioides                                            | unclassified              |  |
| 39959 | 8480            | 11309   | 6915    | 7438  | 10246     | 12773   | 10486   | 10486 | Bacteria | Actinobacteria | Actinobacteria | Actinomycetales | Nocardioidaceae      | Propionibacterium                                       | unclassified              |  |
| 38499 | 9681            | 10739   | 6721    | 7990  | 12765     | 13213   | 13031   | 13084 | Bacteria | Actinobacteria | Actinobacteria | Actinomycetales | Nocardioidaceae      | unclassified                                            | unclassified              |  |
| 38519 | 10184           | 10773   | 9349    | 9822  | 12476     | 12947   | 12676   | 12695 | Bacteria | Actinobacteria | Actinobacteria | Actinomycetales | Nocardioidaceae      | unclassified                                            | unclassified              |  |
| 39106 | 9631            | 9105    | 6793    | 8152  | 12415     | 13180   | 12436   | 12496 | Bacteria | Actinobacteria | Actinobacteria | Actinomycetales | Nocardioidaceae      | unclassified                                            | unclassified              |  |
| 39343 | 9927            | 9994    | 6907    | 8012  | 12574     | 13355   | 12932   | 13344 | Bacteria | Actinobacteria | Actinobacteria | Actinomycetales | Nocardioidaceae      | unclassified                                            | unclassified              |  |
| 39833 | 9570            | 10118   | 7628    | 8367  | 12496     | 13542   | 12873   | 13070 | Bacteria | Actinobacteria | Actinobacteria | Actinomycetales | Nocardioidaceae      | unclassified                                            | unclassified              |  |
| 39934 | 9598            | 8413    | 6599    | 7687  | 11742     | 12185   | 11834   | 12007 | Bacteria | Actinobacteria | Actinobacteria | Actinomycetales | Nocardioidaceae      | unclassified                                            | unclassified              |  |
| 40101 | 9413            | 10004   | 7171    | 7346  | 12061     | 12980   | 12285   | 12776 | Bacteria | Actinobacteria | Actinobacteria | Actinomycetales | Nocardioidaceae      | unclassified                                            | unclassified              |  |
| 41103 | 8573            | 9039    | 6406    | 6784  | 11618     | 12139   | 11989   | 11809 | Bacteria | Actinobacteria | Actinobacteria | Actinomycetales | Nocardiopsaceae      | Nocardiopsis                                            | unclassified              |  |
| 41490 | 10049           | 10808   | 8606    | 9279  | 12714     | 13425   | 13091   | 12895 | Bacteria | Actinobacteria | Actinobacteria | Actinomycetales | Nocardiopsaceae      | Nocardiopsis                                            | unclassified              |  |
| 41531 | 9087            | 9552    | 6686    | 7285  | 12012     | 12790   | 13008   | 12190 | Bacteria | Actinobacteria | Actinobacteria | Actinomycetales | Nocardiopsaceae      | Nocardiopsis                                            | unclassified              |  |
| 41652 | 9287            | 9255    | 5486    | 6458  | 12053     | 12371   | 12391   | 12615 | Bacteria | Actinobacteria | Actinobacteria | Actinomycetales | Nocardiopsaceae      | Nocardiopsis                                            | unclassified              |  |
| 41733 | 9284            | 9641    | 8439    | 9295  | 11522     | 12087   | 11918   | 11412 | Bacteria | Actinobacteria | Actinobacteria | Actinomycetales | Nocardiopsaceae      | Nocardiopsis                                            | unclassified              |  |
| 42081 | 8782            | 8782    | 5994    | 6498  | 12117     | 12552   | 12302   | 12759 | Bacteria | Actinobacteria | Actinobacteria | Actinomycetales | Nocardiopsaceae      | Nocardiopsis                                            | unclassified              |  |
| 42218 | 8941            | 9367    | 6366    | 8001  | 11953     | 12532   | 12273   | 12134 | Bacteria | Actinobacteria | Actinobacteria | Actinomycetales | Nocardiopsaceae      | Nocardiopsis                                            | unclassified              |  |
| 39321 | 9988            | 10070   | 6346    | 8305  | 11812     | 13029   | 11897   | 12017 | Bacteria | Actinobacteria | Actinobacteria | Actinomycetales | Propionibacteriaceae | Microlunatus                                            | Microlunatus phosphovorus |  |
| 38770 | 10809           | 9420    | 6839    | 7938  | 13104     | 13190   | 13076   | 13183 | Bacteria | Actinobacteria | Actinobacteria | Actinomycetales | Propionibacteriaceae | Microlunatus                                            |                           |  |
| 40158 | 12788           | 13425   | 12266   | 11847 | 14303     | 14163   | 14307   | 14650 | Bacteria | Actinobacteria | Actinobacteria | Actinomycetales | Propionibacteriaceae | Propionibacterium                                       | Propionibacterium acnes   |  |
| 40159 | 12404           | 12610   | 12120   | 11340 | 13438     | 13493   | 13542   | 13918 | Bacteria | Actinobacteria | Actinobacteria | Actinomycetales | Propionibacteriaceae | Propionibacterium                                       | Propionibacterium acnes   |  |
| 40162 | 12064           | 12063   | 10715   | 11004 | 14326     | 14036   | 14303   | 14413 | Bacteria | Actinobacteria | Actinobacteria | Actinomycetales | Propionibacteriaceae | Propionibacterium                                       | Propionibacterium acnes   |  |
| 40184 | 12025           | 11464   | 11089   | 11746 | 14241     | 13923   | 14302   | 14307 | Bacteria | Actinobacteria | Actinobacteria | Actinomycetales | Propionibacteriaceae | Propionibacterium                                       | Propionibacterium acnes   |  |
| 40264 | 12899           | 12319   | 11030   | 11210 | 14181     | 14048   | 14135   | 14550 | Bacteria | Actinobacteria | Actinobacteria | Actinomycetales | Propionibacteriaceae | Propionibacterium                                       | Propionibacterium acnes   |  |
| 40356 | 10219           | 9573    | 7085    | 9480  | 13612     | 13478   | 13672   | 13734 | Bacteria | Actinobacteria | Actinobacteria | Actinomycetales | Propionibacteriaceae | Propionibacterium                                       | Propionibacterium acnes   |  |
| 40550 | 12003           | 11425   | 7825    | 10865 | 14147     | 13914   | 14142   | 14218 | Bacteria | Actinobacteria | Actinobacteria | Actinomycetales | Propionibacteriaceae | Propionibacterium                                       | Propionibacterium acnes   |  |
| 40686 | 11577           | 9576    | 7628    | 10449 | 13627     | 13526   | 13691   | 13744 | Bacteria | Actinobacteria | Actinobacteria | Actinomycetales | Propionibacteriaceae | Propionibacterium                                       | Propionibacterium acnes   |  |
| 40932 | 11045           | 10797   | 8088    | 10179 | 13939     | 13690   | 13959   | 14061 | Bacteria | Actinobacteria | Actinobacteria | Actinomycetales | Propionibacteriaceae | Propionibacterium                                       | Propionibacterium acnes   |  |
| 41006 | 10270           | 9046    | 6369    | 8478  | 13327     | 13236   | 13525   | 13460 | Bacteria | Actinobacteria | Actinobacteria | Actinomycetales | Propionibacteriaceae | Propionibacterium                                       | Propionibacterium acnes   |  |
| 41012 | 11996           | 12713   | 11979   | 11698 | 13899     | 13873   | 13872   | 14228 | Bacteria | Actinobacteria | Actinobacteria | Actinomycetales | Propionibacteriaceae | Propionibacterium                                       | Propionibacterium acnes   |  |
| 40241 | 9232            | 9389    | 6766    | 8275  | 12436     | 12617   | 12170   | 12314 | Bacteria | Actinobacteria | Actinobacteria | Actinomycetales | Propionibacteriaceae | Propionibacterium                                       | Propionibacterium acnes   |  |
| 40171 | 10224           | 9693    | 6275    | 8429  | 13663     | 13555   | 13868   | 13931 | Bacteria | Actinobacteria | Actinobacteria | Actinomycetales | Propionibacteriaceae | Propionibacterium                                       | unclassified              |  |
| 40188 | 9317            | 8651    | 7016    | 7660  | 12145     | 12255   | 12579   | 12411 | Bacteria | Actinobacteria | Actinobacteria | Actinomycetales | Propionibacteriaceae | Propionibacterium                                       | unclassified              |  |
| 40193 | 10102           | 9545    | 6912    | 8966  | 13008     | 12993   | 13369   | 13193 | Bacteria | Actinobacteria | Actinobacteria | Actinomycetales | Propionibacteriaceae | Propionibacterium                                       | unclassified              |  |
| 40210 | 11440           | 10035   | 6311    | 10249 | 13751     | 13485   | 13723   | 13829 | Bacteria | Actinobacteria | Actinobacteria | Actinomycetales | Propionibacteriaceae | Propionibacterium                                       | unclassified              |  |
| 40333 | 12804           | 13044   | 12795   | 12192 | 14104     | 14028   | 14141   | 13988 | Bacteria | Actinobacteria | Actinobacteria | Actinomycetales | Propionibacteriaceae | Propionibacterium                                       | unclassified              |  |
| 40518 | 11135           | 11682   | 6162    | 9575  | 14128     | 13783   | 14108   | 13986 | Bacteria | Actinobacteria | Actinobacteria | Actinomycetales | Propionibacteriaceae | Propionibacterium                                       | unclassified              |  |
| 40597 | 11068           | 10906   | 10002   | 10093 | 13108     | 12877   | 13332   | 13393 | Bacteria | Actinobacteria | Actinobacteria | Actinomycetales | Propionibacteriaceae | Propionibacterium                                       | unclassified              |  |
| 40685 | 13048           | 13214   | 12720   | 12283 | 14352     | 14162   | 14331   | 14296 | Bacteria | Actinobacteria | Actinobacteria | Actinomycetales | Propionibacteriaceae | Propionibacterium                                       | unclassified              |  |
| 40743 | 9249            | 8733    | 7998    | 8314  | 12102     | 12303   | 12485   | 12373 | Bacteria | Actinobacteria | Actinobacteria | Actinomycetales | Propionibacteriaceae | Propionibacterium                                       | unclassified              |  |
| 40766 | 10685           | 9940    | 8343    | 9292  | 13733     | 13554   | 13886   | 13966 | Bacteria | Actinobacteria | Actinobacteria | Actinomycetales | Propionibacteriaceae | Propionibacterium                                       | unclassified              |  |
| 40853 | 10524           | 10321   | 10208   | 10135 | 13197     | 12974   | 13538   | 13445 | Bacteria | Actinobacteria | Actinobacteria | Actinomycetales | Propionibacteriaceae | Propionibacterium                                       | unclassified              |  |
| 40912 | 10033           | 9231    | 5749    | 8550  | 12960     | 12639   | 13173   | 12952 | Bacteria | Actinobacteria | Actinobacteria | Actinomycetales | Propionibacteriaceae | Propionibacterium                                       | unclassified              |  |
| 41068 | 10422           | 10165   | 6146    | 9055  | 13199     | 13218   | 13543   | 13598 | Bacteria | Actinobacteria | Actinobacteria | Actinomycetales | Propionibacteriaceae | Propionibacterium                                       | unclassified              |  |
| 41085 | 12617           | 12721   | 12625   | 12161 | 13708     | 13843   | 13884   | 13814 | Bacteria | Actinobacteria | Actinobacteria | Actinomycetales | Propionibacteriaceae | Propionibacterium                                       | unclassified              |  |
| 40352 | 9349            | 10997   | 6524    | 7736  | 10088     | 13425   | 9943    | 10055 | Bacteria | Actinobacteria | Actinobacteria | Actinomycetales | Propionibacteriaceae | Tessaracoccus                                           | unclassified              |  |
| 37611 | 9421            | 11171   | 6595    | 7612  | 11883     | 12898   | 12146   | 12418 | Bacteria | Actinobacteria | Actinobacteria | Actinomycetales | Pseudonocardiaceae   | Amycolatopsis                                           | unclassified              |  |
| 37768 | 10122           | 12025   | 8382    | 8795  | 12531     | 13453   | 12698   | 12908 | Bacteria | Actinobacteria | Actinobacteria | Actinomycetales | Pseudonocardiaceae   | Amycolatopsis                                           | unclassified              |  |
| 37841 | 9047            | 8721    | 7392    | 7642  | 11872     | 12235   | 11991   | 12737 | Bacteria | Actinobacteria | Actinobacteria | Actinomycetales | Pseudonocardiaceae   | Amycolatopsis                                           | unclassified              |  |
| 38094 | 9668            | 9643    | 7626    | 7171  | 12517     | 12824   | 12286   | 12438 | Bacteria | Actinobacteria | Actinobacteria | Actinomycetales | Pseudonocardiaceae   | Amycolatopsis                                           | unclassified              |  |
| 37746 | 9988            | 8707    | 6788    | 7598  | 11980     | 12553   | 12057   | 12487 | Bacteria | Actinobacteria | Actinobacteria | Actinomycetales | Pseudonocardiaceae   | Pseudonocardia                                          | unclassified              |  |
| 38173 | 8853            | 7819    | 7819    | 7501  | 12193     | 12845   | 12146   | 12070 | Bacteria | Actinobacteria | Actinobacteria | Actinomycetales | Pseudonocardiaceae   | Pseudonocardia                                          | unclassified              |  |
| 38337 | 9153            | 9989    | 6728    | 6708  | 12936     | 13472   | 13174   | 13512 | Bacteria | Actinobacteria | Actinobacteria | Actinomycetales | Pseudonocardiaceae   | Pseudonocardia                                          | unclassified              |  |
| 38349 | 10747           | 10895   | 10678   | 10389 | 12470     | 13099   | 12678   | 13065 | Bacteria | Actinobacteria | Actinobacteria | Actinomycetales | Pseudonocardiaceae   | Pseudonocardia                                          | unclassified              |  |
| 38108 | 8970            | 9057    | 7918    | 7985  | 11351     | 12283   | 11677   | 12313 | Bacteria | Actinobacteria | Actinobacteria | Actinomycetales | Pseudonocardiaceae   | Saccharopolyspora                                       | unclassified              |  |
| 38506 | 11070           | 11451   | 11090   | 9990  | 13447     | 13483   | 13262   | 13675 | Bacteria | Actinobacteria | Actinobacteria | Actinomycetales | Streptomyetaceae     | Streptomyces                                            | unclassified              |  |
| 38691 | 9463            | 10253   |         |       |           |         |         |       |          |                |                |                 |                      |                                                         |                           |  |

Table S6 (part H): HybScores of OTUs that were called present in at least one of the samples. Taxonomic classifications are based on PhyloChip taxonomy (derived from GreenGenes). Please note, that data presented here was rank normalized before performing statistical analyses presented in the manuscript.

| OTU   | Sample ID (PMA) |       |     |         | Sample ID |       |       |       | taxonomic classification of representative OTU cluster |          |                |                  |                     |                       |        |                  |        |                  | genus | family        | species |
|-------|-----------------|-------|-----|---------|-----------|-------|-------|-------|--------------------------------------------------------|----------|----------------|------------------|---------------------|-----------------------|--------|------------------|--------|------------------|-------|---------------|---------|
|       | UR              | CO    | CRS | CRS     | UR        | CO    | CRS   | CRS   | kingdom                                                | phylum   | class          | order            | family              | genus                 | family | genus            | family | genus            |       |               |         |
| 38400 | 7766            | 6401  |     | 5801    | 6083      | 12315 | 12299 | 12237 | 13052                                                  | Bacteria | Actinobacteria | Actinobacteria   | Actinomycetales     | Tsukamurellaceae      |        | Tsukamurella     |        | Tsukamurella     |       | paurometabola |         |
| 50864 | 9408            | 10146 |     | 7557    | 7816      | 13325 | 13505 | 13107 | 13552                                                  | Bacteria | Actinobacteria | Actinobacteria   | Coriobacteriales    | Coriobacteriaceae     |        | Adlercreutzia    |        | Adlercreutzia    |       | unclassified  |         |
| 50184 | 9741            | 9507  |     | 8853    | 8259      | 11907 | 12215 | 11705 | 12641                                                  | Bacteria | Actinobacteria | Actinobacteria   | Coriobacteriales    | Coriobacteriaceae     |        | Collinsella      |        | Collinsella      |       | aerofaciens   |         |
| 50477 | 9766            | 8874  |     | 8069    | 7304      | 11147 | 12156 | 11523 | 12420                                                  | Bacteria | Actinobacteria | Actinobacteria   | Coriobacteriales    | Coriobacteriaceae     |        | Collinsella      |        | Collinsella      |       | aerofaciens   |         |
| 50847 | 9007            | 9229  |     | 8445    | 8007      | 10960 | 11787 | 11136 | 12097                                                  | Bacteria | Actinobacteria | Actinobacteria   | Coriobacteriales    | Coriobacteriaceae     |        | Collinsella      |        | Collinsella      |       | aerofaciens   |         |
| 41425 | 10503           | 11487 |     | 10788   | 9629      | 12029 | 12543 | 12061 | 12106                                                  | Bacteria | Actinobacteria | Actinobacteria   | koll13              | unclassified          |        | sF8              |        | sF8              |       | unclassified  |         |
| 41093 | 10112           | 10442 |     | 10099   | 8641      | 11260 | 12070 | 11420 | 11628                                                  | Bacteria | Actinobacteria | Actinobacteria   | koll13              | unclassified          |        | sF8              |        | sF8              |       | unclassified  |         |
| 41886 | 9240            | 9267  |     | 7841    | 7768      | 12247 | 12640 | 11908 | 12388                                                  | Bacteria | Actinobacteria | Actinobacteria   | koll13              | unclassified          |        | sF8              |        | sF8              |       | unclassified  |         |
| 42189 | 9305            | 9847  |     | 8006    | 8240      | 11854 | 12147 | 11602 | 11797                                                  | Bacteria | Actinobacteria | Actinobacteria   | koll13              | unclassified          |        | sF8              |        | sF8              |       | unclassified  |         |
| 41114 | 8838            | 9233  |     | 7029    | 7293      | 11993 | 12886 | 12241 | 12443                                                  | Bacteria | Actinobacteria | Actinobacteria   | MC47                | unclassified          |        | sF8              |        | sF8              |       | unclassified  |         |
| 41227 | 8970            | 9991  |     | 7456    | 7529      | 12439 | 13035 | 12478 | 12928                                                  | Bacteria | Actinobacteria | Actinobacteria   | MC47                | unclassified          |        | sF8              |        | sF8              |       | unclassified  |         |
| 41235 | 10257           | 10936 |     | 10552   | 10127     | 12862 | 13329 | 12745 | 13021                                                  | Bacteria | Actinobacteria | Actinobacteria   | MC47                | unclassified          |        | sF8              |        | sF8              |       | unclassified  |         |
| 41265 | 9952            | 10621 |     | 9574    | 9038      | 12778 | 12881 | 13065 | 13061                                                  | Bacteria | Actinobacteria | Actinobacteria   | MC47                | unclassified          |        | sF8              |        | sF8              |       | unclassified  |         |
| 41301 | 9151            | 9149  |     | 7807    | 6861      | 11930 | 12540 | 11258 | 12254                                                  | Bacteria | Actinobacteria | Actinobacteria   | MC47                | unclassified          |        | sF8              |        | sF8              |       | unclassified  |         |
| 41639 | 11191           | 10037 |     | 8131    | 8274      | 11747 | 12642 | 11933 | 12484                                                  | Bacteria | Actinobacteria | Actinobacteria   | MC47                | unclassified          |        | sF8              |        | sF8              |       | unclassified  |         |
| 41755 | 8391            | 8684  |     | 6583    | 7107      | 11725 | 12192 | 11753 | 12094                                                  | Bacteria | Actinobacteria | Actinobacteria   | MC47                | unclassified          |        | sF8              |        | sF8              |       | unclassified  |         |
| 41500 | 10503           | 10947 |     | 9864    | 9025      | 13085 | 13374 | 13258 | 13438                                                  | Bacteria | Actinobacteria | Actinobacteria   | Solirubrobacterales | Conexibacteraceae     |        | unclassified     |        | unclassified     |       | unclassified  |         |
| 41631 | 9050            | 9417  |     | 7208    | 7474      | 12554 | 13200 | 12658 | 12681                                                  | Bacteria | Actinobacteria | Actinobacteria   | Solirubrobacterales | Conexibacteraceae     |        | unclassified     |        | unclassified     |       | unclassified  |         |
| 42131 | 9550            | 9250  |     | 7716    | 6875      | 12162 | 13007 | 12691 | 12597                                                  | Bacteria | Actinobacteria | Actinobacteria   | Solirubrobacterales | Conexibacteraceae     |        | unclassified     |        | unclassified     |       | unclassified  |         |
| 42436 | 8427            | 9181  |     | 7916    | 7048      | 12427 | 12463 | 11423 | 12066                                                  | Bacteria | Actinobacteria | Actinobacteria   | Solirubrobacterales | Conexibacteraceae     |        | unclassified     |        | unclassified     |       | unclassified  |         |
| 42253 | 8678            | 7053  |     | 7023    | 7023      | 1368  | 12212 | 11367 | 11368                                                  | Bacteria | Actinobacteria | Actinobacteria   | Solirubrobacterales | Conexibacteraceae     |        | unclassified     |        | unclassified     |       | unclassified  |         |
| 42426 | 8969            | 8158  |     | 7708    | 7342      | 11432 | 12329 | 11742 | 11525                                                  | Bacteria | Actinobacteria | Actinobacteria   | Solirubrobacterales | Solirubrobacteraceae  |        | Solirubrobacter  |        | Solirubrobacter  |       | unclassified  |         |
| 42095 | 10781           | 11172 |     | 10943   | 10539     | 12139 | 12648 | 12180 | 12783                                                  | Bacteria | Actinobacteria | Actinobacteria   | Solirubrobacterales | Solirubrobacteraceae  |        | unclassified     |        | unclassified     |       | unclassified  |         |
| 42150 | 9583            | 6819  |     | 6700    | 7101      | 11082 | 11713 | 10916 | 10973                                                  | Bacteria | Actinobacteria | Actinobacteria   | Solirubrobacterales | Solirubrobacteraceae  |        | unclassified     |        | unclassified     |       | unclassified  |         |
| 58484 | 9523            | 9718  |     | 8442    | 7641      | 11669 | 12479 | 11910 | 12626                                                  | Bacteria | Actinobacteria | Actinobacteria   | unclassified        | unclassified          |        | sF8              |        | sF8              |       | unclassified  |         |
| 55518 | 8817            | 9548  |     | 7947    | 7132      | 12320 | 13217 | 12213 | 12754                                                  | Bacteria | Aquificae      | Aquificae        | Aquificales         | Desulfurobacteriaceae |        | unclassified     |        | unclassified     |       | unclassified  |         |
| 55774 | 8405            | 8735  |     | 7947    | 6977      | 11443 | 12562 | 11842 | 12174                                                  | Bacteria | Aquificae      | Aquificae        | Aquificales         | Desulfurobacteriaceae |        | unclassified     |        | unclassified     |       | unclassified  |         |
| 61688 | 9688            | 9368  |     | 6768    | 6279      | 9659  | 12366 | 9541  | 9579                                                   | Bacteria | Bacteroidetes  | Bacteroidetes    | Bacteroidia         | Bacteroidales         |        | unclassified     |        | unclassified     |       | unclassified  |         |
| 68573 | 9760            | 9051  |     | 6986    | 7344      | 12330 | 12873 | 12186 | 12789                                                  | Bacteria | Bacteroidetes  | Bacteroidetes    | Bacteroidia         | Bacteroidales         |        | unclassified     |        | unclassified     |       | unclassified  |         |
| 67028 | 8363            | 7835  |     | 7169    | 7333      | 11109 | 11844 | 11625 | 11775                                                  | Bacteria | Bacteroidetes  | Bacteroidetes    | Bacteroidia         | Bacteroidales         |        | Prevotella       |        | Prevotella       |       | unclassified  |         |
| 67542 | 8594            | 7666  |     | 6780    | 7213      | 10897 | 11814 | 11311 | 11698                                                  | Bacteria | Bacteroidetes  | Bacteroidetes    | Bacteroidia         | Bacteroidales         |        | Prevotella       |        | Prevotella       |       | unclassified  |         |
| 67664 | 8886            | 7350  |     | 6704    | 7144      | 10011 | 11067 | 11728 | 12240                                                  | Bacteria | Bacteroidetes  | Bacteroidetes    | Bacteroidia         | Bacteroidales         |        | Prevotella       |        | Prevotella       |       | unclassified  |         |
| 68290 | 9160            | 8724  |     | 7642    | 8454      | 11414 | 12193 | 11782 | 11664                                                  | Bacteria | Bacteroidetes  | Bacteroidetes    | Bacteroidia         | Bacteroidales         |        | Rikenellaceae    |        | Rikenellaceae    |       | unclassified  |         |
| 69046 | 8037            | 8486  |     | 6969    | 7059      | 10427 | 12758 | 11362 | 11594                                                  | Bacteria | Bacteroidetes  | Bacteroidetes    | Bacteroidia         | Bacteroidales         |        | Rikenellaceae    |        | Rikenellaceae    |       | unclassified  |         |
| 69779 | 11334           | 10420 |     | 7023    | 10548     | 11781 | 11753 | 11364 | 11393                                                  | Bacteria | Bacteroidetes  | Bacteroidetes    | Bacteroidia         | Bacteroidales         |        | Rikenellaceae    |        | Rikenellaceae    |       | unclassified  |         |
| 69931 | 11247           | 11670 |     | 11519   | 10982     | 12974 | 13123 | 12608 | 12920                                                  | Bacteria | Bacteroidetes  | Bacteroidetes    | Bacteroidia         | Bacteroidales         |        | Rikenellaceae    |        | Rikenellaceae    |       | unclassified  |         |
| 65875 | 9249            | 11340 |     | 7785    | 6951      | 12748 | 13601 | 12795 | 12717                                                  | Bacteria | Bacteroidetes  | Flavobacteria    | Flavobacteriales    | Corymorphaceae        |        | unclassified     |        | unclassified     |       | unclassified  |         |
| 63161 | 8658            | 8581  |     | 7045    | 7394      | 11766 | 11677 | 11512 | 11921                                                  | Bacteria | Bacteroidetes  | Flavobacteriales | Flavobacteriales    | Flavobacteriaceae     |        | Chryseobacterium |        | Chryseobacterium |       | unclassified  |         |
| 63187 | 8077            | 6063  |     | 5886    | 6339      | 11609 | 11933 | 11630 | 11946                                                  | Bacteria | Bacteroidetes  | Flavobacteriales | Flavobacteriales    | Flavobacteriaceae     |        | Chryseobacterium |        | Chryseobacterium |       | unclassified  |         |
| 63286 | 9778            | 7876  |     | 5980    | 6382      | 13012 | 12488 | 12329 | 12706                                                  | Bacteria | Bacteroidetes  | Flavobacteriales | Flavobacteriales    | Flavobacteriaceae     |        | Chryseobacterium |        | Chryseobacterium |       | unclassified  |         |
| 63400 | 7821            | 6863  |     | 6111    | 6708      | 11404 | 11508 | 11502 | 11835                                                  | Bacteria | Bacteroidetes  | Flavobacteriales | Flavobacteriales    | Flavobacteriaceae     |        | Chryseobacterium |        | Chryseobacterium |       | unclassified  |         |
| 63173 | 10501           | 10243 |     | 6111    | 8811      | 12970 | 13038 | 11948 | 12434                                                  | Bacteria | Bacteroidetes  | Flavobacteriales | Flavobacteriales    | Flavobacteriaceae     |        | Chryseobacterium |        | Chryseobacterium |       | unclassified  |         |
| 63711 | 8255            | 7823  |     | 6152    | 6806      | 12149 | 11573 | 11057 | 11558                                                  | Bacteria | Bacteroidetes  | Flavobacteriales | Flavobacteriales    | Flavobacteriaceae     |        | Chryseobacterium |        | Chryseobacterium |       | unclassified  |         |
| 63864 | 8887            | 7058  |     | 6219    | 6901      | 11954 | 11979 | 12260 | 12770                                                  | Bacteria | Bacteroidetes  | Flavobacteriales | Flavobacteriales    | Flavobacteriaceae     |        | Chryseobacterium |        | Chryseobacterium |       | unclassified  |         |
| 64220 | 9843            | 8905  |     | 8566    | 8268      | 12420 | 12309 | 12368 | 12776                                                  | Bacteria | Bacteroidetes  | Flavobacteriales | Flavobacteriales    | Flavobacteriaceae     |        | Chryseobacterium |        | Chryseobacterium |       | unclassified  |         |
| 64623 | 8575            | 8969  |     | 7755    | 7078      | 10394 | 11306 | 11497 | 11875                                                  | Bacteria | Bacteroidetes  | Flavobacteriales | Flavobacteriales    | Flavobacteriaceae     |        | Chryseobacterium |        | Chryseobacterium |       | unclassified  |         |
| 64654 | 10834           | 8258  |     | 7005    | 6643      | 11174 | 11751 | 10990 | 10916                                                  | Bacteria | Bacteroidetes  | Flavobacteriales | Flavobacteriales    | Flavobacteriaceae     |        | Chryseobacterium |        | Chryseobacterium |       | unclassified  |         |
| 64734 | 8230            | 7491  |     | 6699    | 7555      | 11625 | 11882 | 12009 | 12377                                                  | Bacteria | Bacteroidetes  | Flavobacteriales | Flavobacteriales    | Flavobacteriaceae     |        | Chryseobacterium |        | Chryseobacterium |       | unclassified  |         |
| 64896 | 8026            | 6577  |     | 6077    | 6420      | 11343 | 11549 | 11415 | 12444                                                  | Bacteria | Bacteroidetes  | Flavobacteriales | Flavobacteriales    | Flavobacteriaceae     |        | Chryseobacterium |        | Chryseobacterium |       | unclassified  |         |
| 65050 | 8187            | 7296  |     | 6682    | 7146      | 11891 | 11794 | 11923 | 12399                                                  | Bacteria | Bacteroidetes  | Flavobacteriales | Flavobacteriales    | Flavobacteriaceae     |        | Chryseobacterium |        | Chryseobacterium |       | unclassified  |         |
| 65435 | 9499            | 9442  |     | 8814    | 8414      | 12823 | 12610 | 12410 | 12837                                                  | Bacteria | Bacteroidetes  | Flavobacteriales | Flavobacteriales    | Flavobacteriaceae     |        | Chryseobacterium |        | Chryseobacterium |       | unclassified  |         |
| 65635 | 9145            | 9315  |     | 7137    | 7611      | 12680 | 12707 | 12926 | 13055                                                  | Bacteria | Bacteroidetes  | Flavobacteriales | Flavobacteriales    | Flavobacteriaceae     |        | Chryseobacterium |        | Chryseobacterium |       | unclassified  |         |
| 65807 | 10338           | 10258 |     | 9348    | 8556      | 13035 | 12942 | 12724 | 12978                                                  | Bacteria | Bacteroidetes  | Flavobacteriales | Flavobacteriales    | Flavobacteriaceae     |        | Chryseobacterium |        | Chryseobacterium |       | unclassified  |         |
| 66605 | 8617            | 9444  |     | 8094    | 8661      | 10701 | 12308 | 11756 | 11492                                                  | Bacteria | Bacteroidetes  | Flavobacteriales | Flavobacteriales    | Flavobacteriaceae     |        | Flavobacterium   |        | Flavobacterium   |       | columnare     |         |
| 69912 | 7576            | 8605  |     | 6623    | 7968      | 9648  | 11894 | 10106 | 10639                                                  | Bacteria | Bacteroidetes  | Flavobacteriales | Flavobacteriales    | Flavobacteriaceae     |        | Flavobacterium   |        | Flavobacterium   |       | unclassified  |         |
| 69715 | 10341           | 7764  |     | 6273    | 6865      | 11719 | 12539 | 11194 | 12265                                                  | Bacteria | Bacteroidetes  | Flavobacteriales | Flavobacteriales    | Flavobacteriaceae     |        | Flavobacterium   |        | Flavobacterium   |       | unclassified  |         |
| 63093 | 10296           | 10786 |     | 9876    | 9217      | 13640 | 13493 | 13161 | 13445                                                  | Bacteria | Bacteroidetes  | Flavobacteriales | Flavobacteriales    | Flavobacteriaceae     |        | unclassified     |        | unclassified     |       | unclassified  |         |
| 63182 | 8314            | 7488  |     | 6946    | 6747      | 12518 | 12357 | 11811 | 11779                                                  | Bacteria | Bacteroidetes  | Flavobacteriales | Flavobacteriales    | Flavobacteriaceae     |        | unclassified     |        | unclassified     |       | unclassified  |         |
| 63336 | 10942           | 11590 |     | 11053</ |           |       |       |       |                                                        |          |                |                  |                     |                       |        |                  |        |                  |       |               |         |

Table S6 (part I): HybScores of OTUs that were called present in at least one of the samples. Taxonomic classifications are based on PhyloChip taxonomy (derived from GreenGenes). Please note, that data presented here was rank normalized before performing statistical analyses presented in the manuscript.

| Sample ID (PMA) |        |        |         | Sample ID |       |       |       | taxonomic classification of representative rOTU cluster |          |            |         |            |             |          |                       |  |  |
|-----------------|--------|--------|---------|-----------|-------|-------|-------|---------------------------------------------------------|----------|------------|---------|------------|-------------|----------|-----------------------|--|--|
| OTU             | UR_PMA | CO_PMA | CR8_PMA | CR5_PMA   | UR    | CO    | CR8   | CR5                                                     | kingdom  | phylum     | class   | family     | order       | genus    | species               |  |  |
| 49516           | 8906   | 9900   | 8022    | 7842      | 11109 | 12019 | 12712 | 11806                                                   | Bacteria | Firmicutes | Bacilli | Bacillales | Bacillaceae | Bacillus | Bacillus acidicola    |  |  |
| 49665           | 8733   | 10178  | 8433    | 7751      | 10909 | 11969 | 11806 | 11423                                                   | Bacteria | Firmicutes | Bacilli | Bacillales | Bacillaceae | Bacillus | Bacillus acidicola    |  |  |
| 43709           | 8004   | 9457   | 7867    | 7551      | 11820 | 10738 | 9946  | 10335                                                   | Bacteria | Firmicutes | Bacilli | Bacillales | Bacillaceae | Bacillus | Bacillus anthracis    |  |  |
| 46520           | 10241  | 11979  | 10197   | 9351      | 12617 | 12700 | 12077 | 11854                                                   | Bacteria | Firmicutes | Bacilli | Bacillales | Bacillaceae | Bacillus | Bacillus cytotoxicus  |  |  |
| 45955           | 11345  | 12035  | 10981   | 10457     | 13083 | 12854 | 12856 | 12891                                                   | Bacteria | Firmicutes | Bacilli | Bacillales | Bacillaceae | Bacillus | Bacillus flexus       |  |  |
| 42514           | 7897   | 9445   | 7830    | 7579      | 11721 | 10723 | 10132 | 10359                                                   | Bacteria | Firmicutes | Bacilli | Bacillales | Bacillaceae | Bacillus | Bacillus unclassified |  |  |
| 42609           | 11094  | 11685  | 10906   | 10643     | 12116 | 12416 | 12324 | 12291                                                   | Bacteria | Firmicutes | Bacilli | Bacillales | Bacillaceae | Bacillus | Bacillus unclassified |  |  |
| 42672           | 7605   | 9280   | 6705    | 7390      | 11763 | 10930 | 9781  | 10345                                                   | Bacteria | Firmicutes | Bacilli | Bacillales | Bacillaceae | Bacillus | Bacillus unclassified |  |  |
| 42684           | 7740   | 9320   | 7774    | 7249      | 11540 | 10772 | 9887  | 10114                                                   | Bacteria | Firmicutes | Bacilli | Bacillales | Bacillaceae | Bacillus | Bacillus unclassified |  |  |
| 42748           | 7988   | 9161   | 7706    | 7384      | 11914 | 11000 | 10210 | 10411                                                   | Bacteria | Firmicutes | Bacilli | Bacillales | Bacillaceae | Bacillus | Bacillus unclassified |  |  |
| 42933           | 8850   | 10131  | 8600    | 7168      | 12585 | 12054 | 11909 | 12005                                                   | Bacteria | Firmicutes | Bacilli | Bacillales | Bacillaceae | Bacillus | Bacillus unclassified |  |  |
| 43361           | 7702   | 9176   | 7683    | 7281      | 11651 | 10904 | 9984  | 10355                                                   | Bacteria | Firmicutes | Bacilli | Bacillales | Bacillaceae | Bacillus | Bacillus unclassified |  |  |
| 43461           | 8011   | 9251   | 7746    | 7542      | 11885 | 11010 | 10217 | 10395                                                   | Bacteria | Firmicutes | Bacilli | Bacillales | Bacillaceae | Bacillus | Bacillus unclassified |  |  |
| 43496           | 8169   | 10527  | 6671    | 7358      | 12012 | 11502 | 9840  | 10605                                                   | Bacteria | Firmicutes | Bacilli | Bacillales | Bacillaceae | Bacillus | Bacillus unclassified |  |  |
| 43571           | 8873   | 9871   | 8094    | 7491      | 12476 | 11512 | 11433 | 11453                                                   | Bacteria | Firmicutes | Bacilli | Bacillales | Bacillaceae | Bacillus | Bacillus unclassified |  |  |
| 43705           | 8374   | 11019  | 7771    | 7068      | 10835 | 11875 | 11685 | 10991                                                   | Bacteria | Firmicutes | Bacilli | Bacillales | Bacillaceae | Bacillus | Bacillus unclassified |  |  |
| 43740           | 7533   | 9156   | 6484    | 7379      | 11721 | 10772 | 9406  | 9941                                                    | Bacteria | Firmicutes | Bacilli | Bacillales | Bacillaceae | Bacillus | Bacillus unclassified |  |  |
| 43755           | 9013   | 10012  | 7548    | 7623      | 11959 | 11489 | 11333 | 11338                                                   | Bacteria | Firmicutes | Bacilli | Bacillales | Bacillaceae | Bacillus | Bacillus unclassified |  |  |
| 44069           | 7456   | 9126   | 6506    | 7285      | 11658 | 10748 | 9047  | 9849                                                    | Bacteria | Firmicutes | Bacilli | Bacillales | Bacillaceae | Bacillus | Bacillus unclassified |  |  |
| 47078           | 8908   | 10235  | 7911    | 8060      | 10486 | 11539 | 12007 | 11979                                                   | Bacteria | Firmicutes | Bacilli | Bacillales | Bacillaceae | Bacillus | Bacillus unclassified |  |  |
| 48213           | 9111   | 13413  | 9514    | 9086      | 10563 | 13202 | 11001 | 10894                                                   | Bacteria | Firmicutes | Bacilli | Bacillales | Bacillaceae | Bacillus | Bacillus unclassified |  |  |
| 48215           | 11383  | 13204  | 11249   | 11311     | 12355 | 13776 | 12545 | 12613                                                   | Bacteria | Firmicutes | Bacilli | Bacillales | Bacillaceae | Bacillus | Bacillus unclassified |  |  |
| 48279           | 8162   | 13433  | 8987    | 8519      | 9293  | 13411 | 8950  | 9527                                                    | Bacteria | Firmicutes | Bacilli | Bacillales | Bacillaceae | Bacillus | Bacillus unclassified |  |  |
| 48318           | 8646   | 12927  | 7910    | 7878      | 10370 | 12665 | 10531 | 10954                                                   | Bacteria | Firmicutes | Bacilli | Bacillales | Bacillaceae | Bacillus | Bacillus unclassified |  |  |
| 48364           | 8196   | 13171  | 7228    | 6958      | 8562  | 13425 | 8081  | 9089                                                    | Bacteria | Firmicutes | Bacilli | Bacillales | Bacillaceae | Bacillus | Bacillus unclassified |  |  |
| 48388           | 8705   | 13471  | 8564    | 8741      | 9942  | 13605 | 9795  | 10468                                                   | Bacteria | Firmicutes | Bacilli | Bacillales | Bacillaceae | Bacillus | Bacillus unclassified |  |  |
| 48423           | 8258   | 13208  | 8507    | 7952      | 10536 | 13454 | 10830 | 10925                                                   | Bacteria | Firmicutes | Bacilli | Bacillales | Bacillaceae | Bacillus | Bacillus unclassified |  |  |
| 48440           | 8063   | 13247  | 8309    | 8969      | 10913 | 13463 | 10516 | 10616                                                   | Bacteria | Firmicutes | Bacilli | Bacillales | Bacillaceae | Bacillus | Bacillus unclassified |  |  |
| 48497           | 8383   | 13191  | 8913    | 8040      | 10525 | 13147 | 10881 | 10726                                                   | Bacteria | Firmicutes | Bacilli | Bacillales | Bacillaceae | Bacillus | Bacillus unclassified |  |  |
| 48536           | 8947   | 13611  | 9258    | 8949      | 10368 | 13435 | 10792 | 10764                                                   | Bacteria | Firmicutes | Bacilli | Bacillales | Bacillaceae | Bacillus | Bacillus unclassified |  |  |
| 48581           | 8445   | 13364  | 8416    | 8192      | 9780  | 13218 | 10011 | 10298                                                   | Bacteria | Firmicutes | Bacilli | Bacillales | Bacillaceae | Bacillus | Bacillus unclassified |  |  |
| 48645           | 8286   | 12513  | 8202    | 7066      | 10707 | 12807 | 11047 | 10994                                                   | Bacteria | Firmicutes | Bacilli | Bacillales | Bacillaceae | Bacillus | Bacillus unclassified |  |  |
| 48660           | 8791   | 12788  | 7998    | 8164      | 11359 | 13395 | 11249 | 11437                                                   | Bacteria | Firmicutes | Bacilli | Bacillales | Bacillaceae | Bacillus | Bacillus unclassified |  |  |
| 48662           | 8715   | 13373  | 8828    | 8941      | 9870  | 13409 | 9262  | 10237                                                   | Bacteria | Firmicutes | Bacilli | Bacillales | Bacillaceae | Bacillus | Bacillus unclassified |  |  |
| 48675           | 10129  | 13193  | 10192   | 9862      | 12258 | 13573 | 12121 | 12482                                                   | Bacteria | Firmicutes | Bacilli | Bacillales | Bacillaceae | Bacillus | Bacillus unclassified |  |  |
| 48690           | 7445   | 11855  | 7456    | 7245      | 10802 | 12416 | 10976 | 10960                                                   | Bacteria | Firmicutes | Bacilli | Bacillales | Bacillaceae | Bacillus | Bacillus unclassified |  |  |
| 48691           | 8805   | 13274  | 8574    | 8108      | 10905 | 13051 | 10990 | 11171                                                   | Bacteria | Firmicutes | Bacilli | Bacillales | Bacillaceae | Bacillus | Bacillus unclassified |  |  |
| 48710           | 8806   | 12931  | 6960    | 7614      | 10383 | 12836 | 10413 | 10612                                                   | Bacteria | Firmicutes | Bacilli | Bacillales | Bacillaceae | Bacillus | Bacillus unclassified |  |  |
| 48776           | 12521  | 13023  | 12698   | 12542     | 13659 | 13401 | 13796 | 13661                                                   | Bacteria | Firmicutes | Bacilli | Bacillales | Bacillaceae | Bacillus | Bacillus unclassified |  |  |
| 48784           | 8345   | 12851  | 7149    | 7492      | 10726 | 12797 | 10979 | 11219                                                   | Bacteria | Firmicutes | Bacilli | Bacillales | Bacillaceae | Bacillus | Bacillus unclassified |  |  |
| 48805           | 8398   | 13152  | 9036    | 8165      | 11150 | 13088 | 11107 | 11357                                                   | Bacteria | Firmicutes | Bacilli | Bacillales | Bacillaceae | Bacillus | Bacillus unclassified |  |  |
| 48819           | 8773   | 12987  | 7740    | 7557      | 11299 | 12711 | 11740 | 12036                                                   | Bacteria | Firmicutes | Bacilli | Bacillales | Bacillaceae | Bacillus | Bacillus unclassified |  |  |
| 48821           | 8799   | 13435  | 8916    | 8650      | 10843 | 13514 | 11205 | 11264                                                   | Bacteria | Firmicutes | Bacilli | Bacillales | Bacillaceae | Bacillus | Bacillus unclassified |  |  |
| 48825           | 10089  | 11817  | 9967    | 9258      | 13069 | 13186 | 12908 | 12704                                                   | Bacteria | Firmicutes | Bacilli | Bacillales | Bacillaceae | Bacillus | Bacillus unclassified |  |  |
| 48851           | 9174   | 13156  | 8924    | 8951      | 10452 | 13155 | 10365 | 10737                                                   | Bacteria | Firmicutes | Bacilli | Bacillales | Bacillaceae | Bacillus | Bacillus unclassified |  |  |
| 48861           | 8712   | 13016  | 8644    | 8549      | 10045 | 13056 | 9657  | 10318                                                   | Bacteria | Firmicutes | Bacilli | Bacillales | Bacillaceae | Bacillus | Bacillus unclassified |  |  |
| 48936           | 7281   | 12691  | 7088    | 6913      | 10361 | 12800 | 9869  | 10013                                                   | Bacteria | Firmicutes | Bacilli | Bacillales | Bacillaceae | Bacillus | Bacillus unclassified |  |  |
| 48975           | 9095   | 12973  | 8722    | 8704      | 10258 | 12969 | 10151 | 10626                                                   | Bacteria | Firmicutes | Bacilli | Bacillales | Bacillaceae | Bacillus | Bacillus unclassified |  |  |
| 48981           | 8354   | 12819  | 8437    | 7681      | 10811 | 12681 | 10872 | 11131                                                   | Bacteria | Firmicutes | Bacilli | Bacillales | Bacillaceae | Bacillus | Bacillus unclassified |  |  |
| 49022           | 8950   | 13029  | 8924    | 8301      | 11080 | 12851 | 11148 | 11358                                                   | Bacteria | Firmicutes | Bacilli | Bacillales | Bacillaceae | Bacillus | Bacillus unclassified |  |  |
| 49050           | 10091  | 12530  | 10416   | 9935      | 12871 | 13772 | 12768 | 13054                                                   | Bacteria | Firmicutes | Bacilli | Bacillales | Bacillaceae | Bacillus | Bacillus unclassified |  |  |
| 49052           | 8326   | 13310  | 8713    | 7984      | 10361 | 13283 | 10708 | 10629                                                   | Bacteria | Firmicutes | Bacilli | Bacillales | Bacillaceae | Bacillus | Bacillus unclassified |  |  |
| 49107           | 8354   | 12819  | 8437    | 7681      | 10811 | 12681 | 10872 | 11131                                                   | Bacteria | Firmicutes | Bacilli | Bacillales | Bacillaceae | Bacillus | Bacillus unclassified |  |  |
| 49129           | 8384   | 13591  | 7360    | 7938      | 9612  | 13691 | 9601  | 10356                                                   | Bacteria | Firmicutes | Bacilli | Bacillales | Bacillaceae | Bacillus | Bacillus unclassified |  |  |
| 49160           | 9202   | 13405  | 9423    | 9374      | 10395 | 13458 | 10354 | 10719                                                   | Bacteria | Firmicutes | Bacilli | Bacillales | Bacillaceae | Bacillus | Bacillus unclassified |  |  |
| 49167           | 8077   | 13427  | 8415    | 7297      | 10188 | 13319 | 10435 | 10477                                                   | Bacteria | Firmicutes | Bacilli | Bacillales | Bacillaceae | Bacillus | Bacillus unclassified |  |  |
| 49168           | 8604   | 13148  | 8205    | 7986      | 10740 | 12938 | 10932 | 11228                                                   | Bacteria | Firmicutes | Bacilli | Bacillales | Bacillaceae | Bacillus | Bacillus unclassified |  |  |
| 49172           | 8904   | 13538  | 9037    | 8754      | 10032 | 13546 | 9585  | 10384                                                   | Bacteria | Firmicutes | Bacilli | Bacillales | Bacillaceae | Bacillus | Bacillus unclassified |  |  |
| 49178           | 9224   | 13760  | 9514    | 9287      | 10598 | 13574 | 11042 | 10984                                                   | Bacteria | Firmicutes | Bacilli | Bacillales | Bacillaceae | Bacillus | Bacillus unclassified |  |  |
| 49187           | 9145   | 13443  | 8990    | 8813      | 10522 | 13388 | 11049 | 11175                                                   | Bacteria | Firmicutes | Bacilli | Bacillales | Bacillaceae | Bacillus | Bacillus unclassified |  |  |
| 49214           | 8360   | 13583  | 8792    | 8263      | 9768  | 13443 | 9540  | 9917                                                    | Bacteria | Firmicutes | Bacilli | Bacillales | Bacillaceae | Bacillus | Bacillus unclassified |  |  |
| 49265           | 9765   | 13419  | 9296    | 8883      | 11563 | 13723 | 11754 | 11951                                                   | Bacteria | Firmicutes | Bacilli | Bacillales | Bacillaceae | Bacillus | Bacillus unclassified |  |  |
| 49298           | 10423  | 12916  | 10516   | 10789     | 12073 | 13459 | 12009 | 12153                                                   | Bacteria | Firmicutes | Bacilli | Bacillales | Bacillaceae | Bacillus | Bacillus unclassified |  |  |
| 49305           | 9345   | 12680  | 8842    | 8062      | 12339 | 12874 | 12485 | 12432                                                   | Bacteria | Firmicutes | Bacilli | Bacillales | Bacillaceae | Bacillus | Bacillus unclassified |  |  |
| 49312           | 7713   | 9936   | 6969    | 7211      | 10657 | 11787 | 10233 | 10160                                                   | Bacteria | Firmicutes | Bacilli | Bacillales | Bacillaceae | Bacillus | Bacillus unclassified |  |  |
| 49322           | 11839  | 12720  | 12183   | 11389     | 13662 | 13207 | 13446 | 12924                                                   | Bacteria | Firmicutes | Bacilli | Bacillales | Bacillaceae | Bacillus | Bacillus unclassified |  |  |
| 49325           | 8766   | 13436  | 8684    | 8532      | 10298 | 13183 | 10708 | 10846                                                   | Bacteria | Firmicutes | Bacilli | Bacillales | Bacillaceae | Bacillus | Bacillus unclassified |  |  |
| 49357           | 8715   | 13373  | 8828    | 8941      | 9870  | 13409 | 9262  | 10237                                                   | Bacteria | Firmicutes | Bacilli | Bacillales | Bacillaceae | Bacillus | Bacillus unclassified |  |  |
| 49365           | 8742   | 13631  | 8789    | 8843      | 10561 | 13695 | 10291 | 10632                                                   | Bacteria | Firmicutes | Bacilli | Bacillales | Bacillaceae | Bacillus | Bacillus unclassified |  |  |
| 49366           | 8451   | 13371  | 8086    | 7601      | 10044 | 12973 | 9118  | 10386                                                   | Bacteria | Firmicutes | Bacilli | Bacillales | Bacillaceae | Bacillus | Bacillus unclassified |  |  |
| 49395           | 8358   | 13310  | 8604    | 8000      | 10187 | 13255 | 10435 | 10424                                                   | Bacteria | Firmicutes | Bacilli | Bacillales | Bacillaceae | Bacillus | Bacillus unclassified |  |  |
| 49446           | 8947   | 13611  | 9258    | 8949      | 10368 | 13435 | 10792 | 10764                                                   | Bacteria | Firmicutes | Bacilli | Bacillales | Bacillaceae | Bacillus | Bacillus unclassified |  |  |
| 49493           | 9032   | 13547  | 9440    | 9090      |       |       |       |                                                         |          |            |         |            |             |          |                       |  |  |

Table S6 (part 1): Hy5Scores of OTUs that were called present in at least one of the samples. Taxonomic classifications are based on PhyloChip taxonomy (derived from GreenGenes). Please note, that data presented here was rank normalized before performing statistical analyses presented in the manuscript.

|       |        | Sample ID (PMA) |         |         |       | Sample ID |       |       |         | taxonomic classification of representative rOTU cluster |            |           |            |                   |  |  |  |  |                | genus                     | species |
|-------|--------|-----------------|---------|---------|-------|-----------|-------|-------|---------|---------------------------------------------------------|------------|-----------|------------|-------------------|--|--|--|--|----------------|---------------------------|---------|
| OTU   | UR_PMA | CO_PMA          | CR8_PMA | CR5_PMA | UR    | CO        | CR8   | CR5   | kingdom | phylum                                                  | class      | order     | family     |                   |  |  |  |  |                |                           |         |
| 50857 | 8088   | 9874            | 10503   |         | 7425  | 11118     | 11768 | 12428 | 11669   | Bacteria                                                | Firmicutes | Bacilli   | Bacillales | Paenibacillaceae  |  |  |  |  | Paenibacillus  | unclassified              |         |
| 50911 | 8437   | 10183           | 10084   |         | 6677  | 11728     | 12723 | 13621 | 12707   | Bacteria                                                | Firmicutes | Bacilli   | Bacillales | Paenibacillaceae  |  |  |  |  | Paenibacillus  | unclassified              |         |
| 42472 | 8480   | 7571            | 6431    |         | 6580  | 11052     | 11935 | 11877 | 12221   | Bacteria                                                | Firmicutes | Bacilli   | Bacillales | Planococcaceae    |  |  |  |  | Bacillus       | Bacillus psychrodurans    |         |
| 42470 | 9166   | 9281            | 8026    |         | 7400  | 11504     | 11148 | 12082 | 11677   | Bacteria                                                | Firmicutes | Bacilli   | Bacillales | Planococcaceae    |  |  |  |  | Solibacillus   | unclassified              |         |
| 43752 | 10097  | 11541           | 10399   |         | 10128 | 12269     | 12234 | 12040 | 12456   | Bacteria                                                | Firmicutes | Bacilli   | Bacillales | Planococcaceae    |  |  |  |  | Solibacillus   | unclassified              |         |
| 43416 | 8026   | 9562            | 8229    |         | 7121  | 11912     | 12152 | 12168 | 12542   | Bacteria                                                | Firmicutes | Bacilli   | Bacillales | Planococcaceae    |  |  |  |  | Planococcus    | unclassified              |         |
| 43095 | 8793   | 9014            | 8630    |         | 6723  | 12562     | 13056 | 13271 | 12949   | Bacteria                                                | Firmicutes | Bacilli   | Bacillales | Staphylococcaceae |  |  |  |  | Jeotgalicoccus | unclassified              |         |
| 43749 | 9145   | 10099           | 8631    |         | 7780  | 13161     | 13179 | 13269 | 13210   | Bacteria                                                | Firmicutes | Bacilli   | Bacillales | Staphylococcaceae |  |  |  |  | Jeotgalicoccus | unclassified              |         |
| 44033 | 8871   | 9844            | 7973    |         | 7376  | 12504     | 13050 | 13139 | 13127   | Bacteria                                                | Firmicutes | Bacilli   | Bacillales | Staphylococcaceae |  |  |  |  | Jeotgalicoccus | unclassified              |         |
| 48021 | 9263   | 8382            | 7486    |         | 7545  | 11566     | 10920 | 12230 | 12225   | Bacteria                                                | Firmicutes | Bacilli   | Bacillales | Staphylococcaceae |  |  |  |  | Staphylococcus | Staphylococcus arletiae   |         |
| 45914 | 10672  | 10362           | 7275    |         | 7298  | 13396     | 12871 | 13861 | 13629   | Bacteria                                                | Firmicutes | Bacilli   | Bacillales | Staphylococcaceae |  |  |  |  | Staphylococcus | Staphylococcus epidemidis |         |
| 45951 | 10347  | 10758           | 7480    |         | 6929  | 13320     | 12756 | 13727 | 13456   | Bacteria                                                | Firmicutes | Bacilli   | Bacillales | Staphylococcaceae |  |  |  |  | Staphylococcus | Staphylococcus epidemidis |         |
| 45954 | 11404  | 11148           | 10278   |         | 10421 | 12878     | 12510 | 13415 | 13219   | Bacteria                                                | Firmicutes | Bacilli   | Bacillales | Staphylococcaceae |  |  |  |  | Staphylococcus | Staphylococcus epidemidis |         |
| 46025 | 10840  | 10310           | 6608    |         | 7056  | 13447     | 12674 | 13711 | 13419   | Bacteria                                                | Firmicutes | Bacilli   | Bacillales | Staphylococcaceae |  |  |  |  | Staphylococcus | Staphylococcus epidemidis |         |
| 46067 | 10588  | 11031           | 8649    |         | 8908  | 13020     | 13288 | 13472 | 13530   | Bacteria                                                | Firmicutes | Bacilli   | Bacillales | Staphylococcaceae |  |  |  |  | Staphylococcus | Staphylococcus epidemidis |         |
| 46138 | 10646  | 10196           | 6991    |         | 7443  | 13575     | 13038 | 13998 | 13831   | Bacteria                                                | Firmicutes | Bacilli   | Bacillales | Staphylococcaceae |  |  |  |  | Staphylococcus | Staphylococcus epidemidis |         |
| 46162 | 10663  | 10822           | 7546    |         | 7370  | 13463     | 12962 | 13899 | 13683   | Bacteria                                                | Firmicutes | Bacilli   | Bacillales | Staphylococcaceae |  |  |  |  | Staphylococcus | Staphylococcus epidemidis |         |
| 46163 | 11261  | 10748           | 6955    |         | 7719  | 13732     | 13096 | 13920 | 13807   | Bacteria                                                | Firmicutes | Bacilli   | Bacillales | Staphylococcaceae |  |  |  |  | Staphylococcus | Staphylococcus epidemidis |         |
| 46189 | 11554  | 12280           | 10562   |         | 10004 | 13922     | 13545 | 14014 | 14186   | Bacteria                                                | Firmicutes | Bacilli   | Bacillales | Staphylococcaceae |  |  |  |  | Staphylococcus | Staphylococcus epidemidis |         |
| 46215 | 10511  | 10365           | 6618    |         | 8941  | 12734     | 12804 | 12889 | 12940   | Bacteria                                                | Firmicutes | Bacilli   | Bacillales | Staphylococcaceae |  |  |  |  | Staphylococcus | Staphylococcus epidemidis |         |
| 46217 | 11089  | 10323           | 7257    |         | 7784  | 13837     | 13981 | 13848 | 13672   | Bacteria                                                | Firmicutes | Bacilli   | Bacillales | Staphylococcaceae |  |  |  |  | Staphylococcus | Staphylococcus epidemidis |         |
| 46226 | 9957   | 11170           | 7987    |         | 7641  | 13401     | 12638 | 13303 | 13093   | Bacteria                                                | Firmicutes | Bacilli   | Bacillales | Staphylococcaceae |  |  |  |  | Staphylococcus | Staphylococcus epidemidis |         |
| 46243 | 10668  | 11342           | 9082    |         | 8963  | 13253     | 13011 | 13372 | 13265   | Bacteria                                                | Firmicutes | Bacilli   | Bacillales | Staphylococcaceae |  |  |  |  | Staphylococcus | Staphylococcus epidemidis |         |
| 46244 | 10023  | 11713           | 9255    |         | 7914  | 13477     | 13260 | 13717 | 13843   | Bacteria                                                | Firmicutes | Bacilli   | Bacillales | Staphylococcaceae |  |  |  |  | Staphylococcus | Staphylococcus epidemidis |         |
| 46260 | 11251  | 11120           | 7839    |         | 8839  | 13847     | 13434 | 13941 | 13814   | Bacteria                                                | Firmicutes | Bacilli   | Bacillales | Staphylococcaceae |  |  |  |  | Staphylococcus | Staphylococcus epidemidis |         |
| 46293 | 10981  | 10542           | 7051    |         | 7969  | 13402     | 12891 | 13740 | 13553   | Bacteria                                                | Firmicutes | Bacilli   | Bacillales | Staphylococcaceae |  |  |  |  | Staphylococcus | Staphylococcus epidemidis |         |
| 46372 | 8694   | 9211            | 9036    |         | 8424  | 12234     | 12159 | 12465 | 12106   | Bacteria                                                | Firmicutes | Bacilli   | Bacillales | Staphylococcaceae |  |  |  |  | Staphylococcus | Staphylococcus epidemidis |         |
| 46408 | 10211  | 10918           | 11137   |         | 8054  | 12618     | 12345 | 13493 | 13213   | Bacteria                                                | Firmicutes | Bacilli   | Bacillales | Staphylococcaceae |  |  |  |  | Staphylococcus | Staphylococcus epidemidis |         |
| 46417 | 11061  | 10486           | 7196    |         | 7804  | 13546     | 13023 | 13876 | 13720   | Bacteria                                                | Firmicutes | Bacilli   | Bacillales | Staphylococcaceae |  |  |  |  | Staphylococcus | Staphylococcus epidemidis |         |
| 46450 | 10691  | 10904           | 7573    |         | 7415  | 13368     | 12769 | 13714 | 13488   | Bacteria                                                | Firmicutes | Bacilli   | Bacillales | Staphylococcaceae |  |  |  |  | Staphylococcus | Staphylococcus epidemidis |         |
| 46451 | 10277  | 9807            | 7500    |         | 7530  | 13341     | 12890 | 13618 | 13274   | Bacteria                                                | Firmicutes | Bacilli   | Bacillales | Staphylococcaceae |  |  |  |  | Staphylococcus | Staphylococcus epidemidis |         |
| 46516 | 10874  | 10701           | 7016    |         | 7469  | 13520     | 12973 | 13890 | 13710   | Bacteria                                                | Firmicutes | Bacilli   | Bacillales | Staphylococcaceae |  |  |  |  | Staphylococcus | Staphylococcus epidemidis |         |
| 46562 | 10725  | 10985           | 6025    |         | 7258  | 13898     | 13416 | 14205 | 14152   | Bacteria                                                | Firmicutes | Bacilli   | Bacillales | Staphylococcaceae |  |  |  |  | Staphylococcus | Staphylococcus epidemidis |         |
| 46568 | 10253  | 10231           | 6683    |         | 7211  | 12919     | 12172 | 13478 | 13114   | Bacteria                                                | Firmicutes | Bacilli   | Bacillales | Staphylococcaceae |  |  |  |  | Staphylococcus | Staphylococcus epidemidis |         |
| 46572 | 11253  | 10444           | 7118    |         | 7781  | 13576     | 12960 | 13819 | 13603   | Bacteria                                                | Firmicutes | Bacilli   | Bacillales | Staphylococcaceae |  |  |  |  | Staphylococcus | Staphylococcus epidemidis |         |
| 46607 | 10526  | 10214           | 6758    |         | 7258  | 13407     | 12667 | 13656 | 13384   | Bacteria                                                | Firmicutes | Bacilli   | Bacillales | Staphylococcaceae |  |  |  |  | Staphylococcus | Staphylococcus epidemidis |         |
| 46611 | 11061  | 10401           | 6820    |         | 7636  | 13644     | 12911 | 13825 | 13609   | Bacteria                                                | Firmicutes | Bacilli   | Bacillales | Staphylococcaceae |  |  |  |  | Staphylococcus | Staphylococcus epidemidis |         |
| 46612 | 10685  | 9964            | 7737    |         | 8800  | 13605     | 13407 | 13576 | 13125   | Bacteria                                                | Firmicutes | Bacilli   | Bacillales | Staphylococcaceae |  |  |  |  | Staphylococcus | Staphylococcus epidemidis |         |
| 46667 | 11560  | 11320           | 7930    |         | 8640  | 13886     | 13378 | 13926 | 13838   | Bacteria                                                | Firmicutes | Bacilli   | Bacillales | Staphylococcaceae |  |  |  |  | Staphylococcus | Staphylococcus epidemidis |         |
| 46682 | 10754  | 10322           | 6737    |         | 7372  | 13450     | 12882 | 13710 | 13416   | Bacteria                                                | Firmicutes | Bacilli   | Bacillales | Staphylococcaceae |  |  |  |  | Staphylococcus | Staphylococcus epidemidis |         |
| 46694 | 10874  | 10278           | 6974    |         | 7208  | 13496     | 12853 | 13821 | 13633   | Bacteria                                                | Firmicutes | Bacilli   | Bacillales | Staphylococcaceae |  |  |  |  | Staphylococcus | Staphylococcus epidemidis |         |
| 46712 | 10722  | 10817           | 7664    |         | 7412  | 13623     | 13011 | 13941 | 13713   | Bacteria                                                | Firmicutes | Bacilli   | Bacillales | Staphylococcaceae |  |  |  |  | Staphylococcus | Staphylococcus epidemidis |         |
| 46718 | 10865  | 10301           | 7173    |         | 7816  | 13025     | 12472 | 13675 | 13291   | Bacteria                                                | Firmicutes | Bacilli   | Bacillales | Staphylococcaceae |  |  |  |  | Staphylococcus | Staphylococcus epidemidis |         |
| 46752 | 10854  | 10211           | 7197    |         | 7645  | 13487     | 12852 | 13792 | 13587   | Bacteria                                                | Firmicutes | Bacilli   | Bacillales | Staphylococcaceae |  |  |  |  | Staphylococcus | Staphylococcus epidemidis |         |
| 46779 | 10131  | 9877            | 6943    |         | 8080  | 12450     | 12462 | 13046 | 12746   | Bacteria                                                | Firmicutes | Bacilli   | Bacillales | Staphylococcaceae |  |  |  |  | Staphylococcus | Staphylococcus epidemidis |         |
| 46794 | 10028  | 10465           | 8330    |         | 8138  | 12556     | 12311 | 12816 | 12585   | Bacteria                                                | Firmicutes | Bacilli   | Bacillales | Staphylococcaceae |  |  |  |  | Staphylococcus | Staphylococcus epidemidis |         |
| 46819 | 10304  | 10341           | 8840    |         | 7922  | 12851     | 12795 | 13308 | 13265   | Bacteria                                                | Firmicutes | Bacilli   | Bacillales | Staphylococcaceae |  |  |  |  | Staphylococcus | Staphylococcus epidemidis |         |
| 46826 | 10592  | 10498           | 7678    |         | 7448  | 13370     | 13071 | 13821 | 13663   | Bacteria                                                | Firmicutes | Bacilli   | Bacillales | Staphylococcaceae |  |  |  |  | Staphylococcus | Staphylococcus epidemidis |         |
| 46886 | 9676   | 11576           | 8843    |         | 7289  | 13329     | 13082 | 13620 | 13635   | Bacteria                                                | Firmicutes | Bacilli   | Bacillales | Staphylococcaceae |  |  |  |  | Staphylococcus | Staphylococcus epidemidis |         |
| 46913 | 9017   | 10331           | 8103    |         | 7410  | 12760     | 12310 | 13032 | 12994   | Bacteria                                                | Firmicutes | Bacilli   | Bacillales | Staphylococcaceae |  |  |  |  | Staphylococcus | Staphylococcus epidemidis |         |
| 46998 | 9990   | 10704           | 7906    |         | 7274  | 13277     | 12445 | 13338 | 13093   | Bacteria                                                | Firmicutes | Bacilli   | Bacillales | Staphylococcaceae |  |  |  |  | Staphylococcus | Staphylococcus epidemidis |         |
| 47034 | 10167  | 10819           | 8154    |         | 7772  | 13402     | 12934 | 13803 | 13650   | Bacteria                                                | Firmicutes | Bacilli   | Bacillales | Staphylococcaceae |  |  |  |  | Staphylococcus | Staphylococcus epidemidis |         |
| 47109 | 10532  | 10793           | 7666    |         | 7422  | 13411     | 12830 | 13778 | 13559   | Bacteria                                                | Firmicutes | Bacilli   | Bacillales | Staphylococcaceae |  |  |  |  | Staphylococcus | Staphylococcus epidemidis |         |
| 47128 | 10671  | 11107           | 8198    |         | 7634  | 13802     | 13213 | 13974 | 13875   | Bacteria                                                | Firmicutes | Bacilli   | Bacillales | Staphylococcaceae |  |  |  |  | Staphylococcus | Staphylococcus epidemidis |         |
| 47130 | 10784  | 10867           | 7079    |         | 7243  | 13482     | 12852 | 13716 | 13594   | Bacteria                                                | Firmicutes | Bacilli   | Bacillales | Staphylococcaceae |  |  |  |  | Staphylococcus | Staphylococcus epidemidis |         |
| 47137 | 10378  | 11019           | 8730    |         | 8799  | 12900     | 12761 | 13114 | 13126   | Bacteria                                                | Firmicutes | Bacilli   | Bacillales | Staphylococcaceae |  |  |  |  | Staphylococcus | Staphylococcus epidemidis |         |
| 47173 | 8551   | 8607            | 7663    |         | 6925  | 11893     | 12479 | 12958 | 12758   | Bacteria                                                | Firmicutes | Bacilli   | Bacillales | Staphylococcaceae |  |  |  |  | Staphylococcus | Staphylococcus epidemidis |         |
| 47200 | 10461  | 10448           | 7672    |         | 7499  | 13311     | 12745 | 13714 | 13442   | Bacteria                                                | Firmicutes | Bacilli   | Bacillales | Staphylococcaceae |  |  |  |  | Staphylococcus | Staphylococcus epidemidis |         |
| 47276 | 10990  | 11145           | 10253   |         | 9146  | 12842     | 12842 | 13098 | 13058   | Bacteria                                                | Firmicutes | Bacilli   | Bacillales | Staphylococcaceae |  |  |  |  | Staphylococcus | Staphylococcus epidemidis |         |
| 47306 | 10734  | 10446           | 6959    |         | 7795  | 12659     | 12223 | 13338 | 13000   | Bacteria                                                | Firmicutes | Bacilli   | Bacillales | Staphylococcaceae |  |  |  |  | Staphylococcus | Staphylococcus epidemidis |         |
| 47320 | 10602  | 10431           | 6717    |         | 7638  | 12346     | 12874 | 13648 | 13497   | Bacteria                                                | Firmicutes | Bacilli   | Bacillales | Staphylococcaceae |  |  |  |  | Staphylococcus | Staphylococcus epidemidis |         |
| 47331 | 10357  | 11424           | 9452    |         | 7188  | 13930     | 13071 | 13801 | 13801   | Bacteria                                                | Firmicutes | Bacilli   | Bacillales | Staphylococcaceae |  |  |  |  | Staphylococcus | Staphylococcus epidemidis |         |
| 47341 | 11225  | 10426           | 10345   |         | 8016  | 13932     | 13557 | 13801 | 13872   | Bacteria                                                | Firmicutes | Bacilli   | Bacillales | Staphylococcaceae |  |  |  |  | Staphylococcus | Staphylococcus epidemidis |         |
| 47345 | 10865  | 10301           | 7173    |         | 7816  | 13025     | 12472 | 13675 | 13291   | Bacteria                                                | Firmicutes | Bacilli   | Bacillales | Staphylococcaceae |  |  |  |  | Staphylococcus | Staphylococcus epidemidis |         |
| 47361 | 10745  | 10444           | 6932    |         | 7584  | 13435     | 12795 | 13723 | 13506   | Bacteria                                                | Firmicutes | Bacilli   | Bacillales | Staphylococcaceae |  |  |  |  | Staphylococcus | Staphylococcus epidemidis |         |
| 47419 | 10213  | 11576           | 9523    |         | 7313  | 12036     | 12346 | 12676 | 12395   | Bacteria                                                | Firmicutes | Bacilli   | Bacillales | Staphylococcaceae |  |  |  |  | Staphylococcus | Staphylococcus epidemidis |         |
| 47425 | 10668  | 10444           | 6866    |         | 7927  | 13171     | 12711 | 13514 | 13407   | Bacteria                                                | Firmicutes | Bacilli   | Bacillales | Staphylococcaceae |  |  |  |  | Staphylococcus | Staphylococcus epidemidis |         |
| 47445 | 10552  | 10350           | 7639    |         | 7404  | 13111     | 12723 | 13698 | 13413   | Bacteria                                                | Firmicutes | Bacilli</ |            |                   |  |  |  |  |                |                           |         |

Table S6 (part K): Hy5-cosets of OTUs that were called present in at least one of the samples. Taxonomic classifications are based on PhyloChip taxonomy (derived from GreenGenes). Please note, that data presented here was rank normalized before performing statistical analyses presented in the manuscript.

| OTU   | Sample ID (PMA) |       |    |       | Sample ID |       |       |       | taxonomic classification of representative rOTU cluster |          |            |         |            |                   |                |                             |
|-------|-----------------|-------|----|-------|-----------|-------|-------|-------|---------------------------------------------------------|----------|------------|---------|------------|-------------------|----------------|-----------------------------|
|       | UR              | PMA   | CO | CR8   | CR5       | UR    | CO    | CR8   | CR5                                                     | kingdom  | phylum     | class   | order      | family            | genus          | species                     |
| 48089 | 10324           | 9310  |    | 6625  | 7794      | 12640 | 12252 | 13370 | 13220                                                   | Bacteria | Firmicutes | Bacilli | Bacillales | Staphylococcaceae | Staphylococcus | Staphylococcus haemolyticus |
| 46119 | 9215            | 8571  |    | 6068  | 5906      | 12656 | 11585 | 13485 | 13290                                                   | Bacteria | Firmicutes | Bacilli | Bacillales | Staphylococcaceae | Staphylococcus | Staphylococcus pettenkoferi |
| 47000 | 10274           | 12028 |    | 9288  | 8388      | 11337 | 11548 | 12216 | 11644                                                   | Bacteria | Firmicutes | Bacilli | Bacillales | Staphylococcaceae | Staphylococcus | Staphylococcus sciuri       |
| 47738 | 9190            | 10589 |    | 7818  | 7773      | 11146 | 10982 | 11825 | 10872                                                   | Bacteria | Firmicutes | Bacilli | Bacillales | Staphylococcaceae | Staphylococcus | Staphylococcus sciuri       |
| 45900 | 10197           | 9962  |    | 7430  | 6962      | 13236 | 12783 | 13739 | 13495                                                   | Bacteria | Firmicutes | Bacilli | Bacillales | Staphylococcaceae | Staphylococcus | unclassified                |
| 45974 | 9351            | 10388 |    | 8256  | 7415      | 12578 | 12204 | 13145 | 12985                                                   | Bacteria | Firmicutes | Bacilli | Bacillales | Staphylococcaceae | Staphylococcus | unclassified                |
| 46013 | 8257            | 10195 |    | 6902  | 6480      | 13165 | 12741 | 13805 | 12929                                                   | Bacteria | Firmicutes | Bacilli | Bacillales | Staphylococcaceae | Staphylococcus | unclassified                |
| 46074 | 10422           | 9565  |    | 6705  | 7930      | 12935 | 12421 | 13404 | 13241                                                   | Bacteria | Firmicutes | Bacilli | Bacillales | Staphylococcaceae | Staphylococcus | unclassified                |
| 46081 | 10507           | 10445 |    | 7081  | 7441      | 13216 | 12469 | 13588 | 13329                                                   | Bacteria | Firmicutes | Bacilli | Bacillales | Staphylococcaceae | Staphylococcus | unclassified                |
| 46157 | 10259           | 11786 |    | 7584  | 8219      | 12838 | 12726 | 13334 | 13170                                                   | Bacteria | Firmicutes | Bacilli | Bacillales | Staphylococcaceae | Staphylococcus | unclassified                |
| 46167 | 10665           | 10315 |    | 6736  | 7209      | 13495 | 12835 | 13814 | 13627                                                   | Bacteria | Firmicutes | Bacilli | Bacillales | Staphylococcaceae | Staphylococcus | unclassified                |
| 46176 | 10449           | 10076 |    | 6886  | 7482      | 13280 | 12628 | 13662 | 13475                                                   | Bacteria | Firmicutes | Bacilli | Bacillales | Staphylococcaceae | Staphylococcus | unclassified                |
| 46194 | 10417           | 10785 |    | 6249  | 7081      | 13595 | 13167 | 13963 | 13867                                                   | Bacteria | Firmicutes | Bacilli | Bacillales | Staphylococcaceae | Staphylococcus | unclassified                |
| 46228 | 10293           | 10277 |    | 6908  | 7432      | 13022 | 12491 | 13553 | 13120                                                   | Bacteria | Firmicutes | Bacilli | Bacillales | Staphylococcaceae | Staphylococcus | unclassified                |
| 46259 | 9331            | 11253 |    | 7804  | 8179      | 11980 | 11886 | 12416 | 12316                                                   | Bacteria | Firmicutes | Bacilli | Bacillales | Staphylococcaceae | Staphylococcus | unclassified                |
| 46278 | 10312           | 10389 |    | 8717  | 8075      | 12841 | 12831 | 13353 | 13220                                                   | Bacteria | Firmicutes | Bacilli | Bacillales | Staphylococcaceae | Staphylococcus | unclassified                |
| 46329 | 11482           | 12001 |    | 11820 | 10894     | 13420 | 13382 | 13387 | 13443                                                   | Bacteria | Firmicutes | Bacilli | Bacillales | Staphylococcaceae | Staphylococcus | unclassified                |
| 46342 | 9955            | 9796  |    | 6675  | 6589      | 12767 | 12407 | 13341 | 12996                                                   | Bacteria | Firmicutes | Bacilli | Bacillales | Staphylococcaceae | Staphylococcus | unclassified                |
| 46360 | 10411           | 9499  |    | 6505  | 7584      | 12802 | 12352 | 13372 | 13221                                                   | Bacteria | Firmicutes | Bacilli | Bacillales | Staphylococcaceae | Staphylococcus | unclassified                |
| 46362 | 10951           | 8838  |    | 6676  | 7081      | 12717 | 12306 | 13304 | 12862                                                   | Bacteria | Firmicutes | Bacilli | Bacillales | Staphylococcaceae | Staphylococcus | unclassified                |
| 46367 | 10552           | 10282 |    | 7369  | 7247      | 13235 | 12719 | 13727 | 13401                                                   | Bacteria | Firmicutes | Bacilli | Bacillales | Staphylococcaceae | Staphylococcus | unclassified                |
| 46420 | 12231           | 12849 |    | 11812 | 11313     | 14355 | 14203 | 14283 | 14634                                                   | Bacteria | Firmicutes | Bacilli | Bacillales | Staphylococcaceae | Staphylococcus | unclassified                |
| 46463 | 10901           | 10591 |    | 7916  | 7831      | 13401 | 13109 | 13740 | 13579                                                   | Bacteria | Firmicutes | Bacilli | Bacillales | Staphylococcaceae | Staphylococcus | unclassified                |
| 46464 | 10749           | 10729 |    | 7141  | 8438      | 13480 | 12885 | 13817 | 13691                                                   | Bacteria | Firmicutes | Bacilli | Bacillales | Staphylococcaceae | Staphylococcus | unclassified                |
| 46484 | 9181            | 8771  |    | 8381  | 7774      | 11716 | 11975 | 12156 | 11957                                                   | Bacteria | Firmicutes | Bacilli | Bacillales | Staphylococcaceae | Staphylococcus | unclassified                |
| 46527 | 10807           | 11499 |    | 6656  | 7476      | 13787 | 13055 | 14153 | 14053                                                   | Bacteria | Firmicutes | Bacilli | Bacillales | Staphylococcaceae | Staphylococcus | unclassified                |
| 46532 | 10346           | 10131 |    | 6923  | 7179      | 13451 | 12895 | 13912 | 13722                                                   | Bacteria | Firmicutes | Bacilli | Bacillales | Staphylococcaceae | Staphylococcus | unclassified                |
| 46539 | 9955            | 9501  |    | 6936  | 6626      | 12653 | 12026 | 13134 | 12580                                                   | Bacteria | Firmicutes | Bacilli | Bacillales | Staphylococcaceae | Staphylococcus | unclassified                |
| 46548 | 8434            | 8051  |    | 6450  | 6795      | 11291 | 10608 | 11994 | 11770                                                   | Bacteria | Firmicutes | Bacilli | Bacillales | Staphylococcaceae | Staphylococcus | unclassified                |
| 46608 | 10898           | 10885 |    | 7150  | 7389      | 13531 | 12798 | 13833 | 13660                                                   | Bacteria | Firmicutes | Bacilli | Bacillales | Staphylococcaceae | Staphylococcus | unclassified                |
| 46621 | 10857           | 10382 |    | 7064  | 7567      | 13398 | 12807 | 13711 | 13518                                                   | Bacteria | Firmicutes | Bacilli | Bacillales | Staphylococcaceae | Staphylococcus | unclassified                |
| 46645 | 9616            | 10454 |    | 7293  | 6768      | 12884 | 12245 | 13176 | 12908                                                   | Bacteria | Firmicutes | Bacilli | Bacillales | Staphylococcaceae | Staphylococcus | unclassified                |
| 46661 | 9552            | 9850  |    | 8662  | 8254      | 12485 | 12371 | 13004 | 12840                                                   | Bacteria | Firmicutes | Bacilli | Bacillales | Staphylococcaceae | Staphylococcus | unclassified                |
| 46663 | 8612            | 8444  |    | 6794  | 7256      | 11462 | 11107 | 12112 | 11940                                                   | Bacteria | Firmicutes | Bacilli | Bacillales | Staphylococcaceae | Staphylococcus | unclassified                |
| 46668 | 8246            | 12323 |    | 6327  | 6753      | 11719 | 12503 | 13212 | 11896                                                   | Bacteria | Firmicutes | Bacilli | Bacillales | Staphylococcaceae | Staphylococcus | unclassified                |
| 46720 | 10113           | 9451  |    | 7044  | 7510      | 13418 | 12455 | 13713 | 13629                                                   | Bacteria | Firmicutes | Bacilli | Bacillales | Staphylococcaceae | Staphylococcus | unclassified                |
| 46733 | 10233           | 9766  |    | 8731  | 7620      | 13673 | 13405 | 14091 | 13839                                                   | Bacteria | Firmicutes | Bacilli | Bacillales | Staphylococcaceae | Staphylococcus | unclassified                |
| 46738 | 9210            | 8471  |    | 6446  | 7290      | 11959 | 11160 | 12751 | 12586                                                   | Bacteria | Firmicutes | Bacilli | Bacillales | Staphylococcaceae | Staphylococcus | unclassified                |
| 46766 | 10445           | 10683 |    | 6905  | 6983      | 13235 | 12562 | 13567 | 13542                                                   | Bacteria | Firmicutes | Bacilli | Bacillales | Staphylococcaceae | Staphylococcus | unclassified                |
| 46793 | 12167           | 12676 |    | 12314 | 11671     | 14313 | 13759 | 14154 | 14225                                                   | Bacteria | Firmicutes | Bacilli | Bacillales | Staphylococcaceae | Staphylococcus | unclassified                |
| 46809 | 10427           | 10435 |    | 8814  | 8846      | 13532 | 12684 | 13532 | 13236                                                   | Bacteria | Firmicutes | Bacilli | Bacillales | Staphylococcaceae | Staphylococcus | unclassified                |
| 46828 | 9405            | 9390  |    | 6311  | 7095      | 12327 | 11479 | 13033 | 12513                                                   | Bacteria | Firmicutes | Bacilli | Bacillales | Staphylococcaceae | Staphylococcus | unclassified                |
| 46891 | 10659           | 10519 |    | 6790  | 7211      | 13555 | 13252 | 13944 | 13753                                                   | Bacteria | Firmicutes | Bacilli | Bacillales | Staphylococcaceae | Staphylococcus | unclassified                |
| 46894 | 9362            | 9407  |    | 6626  | 6671      | 12426 | 11427 | 12714 | 12381                                                   | Bacteria | Firmicutes | Bacilli | Bacillales | Staphylococcaceae | Staphylococcus | unclassified                |
| 46905 | 10438           | 10832 |    | 7474  | 7397      | 13370 | 12601 | 13607 | 13522                                                   | Bacteria | Firmicutes | Bacilli | Bacillales | Staphylococcaceae | Staphylococcus | unclassified                |
| 46929 | 9378            | 9360  |    | 7108  | 7296      | 12394 | 11885 | 13040 | 12677                                                   | Bacteria | Firmicutes | Bacilli | Bacillales | Staphylococcaceae | Staphylococcus | unclassified                |
| 46947 | 10582           | 10190 |    | 6553  | 7316      | 13398 | 12746 | 13760 | 13560                                                   | Bacteria | Firmicutes | Bacilli | Bacillales | Staphylococcaceae | Staphylococcus | unclassified                |
| 46963 | 10519           | 10265 |    | 7203  | 7394      | 13238 | 12608 | 13567 | 13400                                                   | Bacteria | Firmicutes | Bacilli | Bacillales | Staphylococcaceae | Staphylococcus | unclassified                |
| 46981 | 10141           | 11418 |    | 8204  | 8295      | 13324 | 13048 | 13452 | 13400                                                   | Bacteria | Firmicutes | Bacilli | Bacillales | Staphylococcaceae | Staphylococcus | unclassified                |
| 47019 | 10353           | 10722 |    | 9685  | 9611      | 13452 | 12393 | 13380 | 12796                                                   | Bacteria | Firmicutes | Bacilli | Bacillales | Staphylococcaceae | Staphylococcus | unclassified                |
| 47101 | 8386            | 9627  |    | 5737  | 6655      | 11527 | 10446 | 12571 | 11467                                                   | Bacteria | Firmicutes | Bacilli | Bacillales | Staphylococcaceae | Staphylococcus | unclassified                |
| 47114 | 11301           | 11774 |    | 10342 | 9899      | 13074 | 12962 | 13416 | 13306                                                   | Bacteria | Firmicutes | Bacilli | Bacillales | Staphylococcaceae | Staphylococcus | unclassified                |
| 47129 | 10378           | 10182 |    | 6900  | 7201      | 13355 | 12689 | 13741 | 13529                                                   | Bacteria | Firmicutes | Bacilli | Bacillales | Staphylococcaceae | Staphylococcus | unclassified                |
| 47135 | 10336           | 10052 |    | 6817  | 7078      | 12717 | 11996 | 13419 | 13068                                                   | Bacteria | Firmicutes | Bacilli | Bacillales | Staphylococcaceae | Staphylococcus | unclassified                |
| 47152 | 10353           | 10392 |    | 6887  | 7085      | 13351 | 12680 | 13637 | 13471                                                   | Bacteria | Firmicutes | Bacilli | Bacillales | Staphylococcaceae | Staphylococcus | unclassified                |
| 47175 | 10552           | 10471 |    | 6525  | 7057      | 13373 | 12975 | 13812 | 13684                                                   | Bacteria | Firmicutes | Bacilli | Bacillales | Staphylococcaceae | Staphylococcus | unclassified                |
| 47185 | 10790           | 10350 |    | 7273  | 7556      | 13264 | 12604 | 13636 | 13431                                                   | Bacteria | Firmicutes | Bacilli | Bacillales | Staphylococcaceae | Staphylococcus | unclassified                |
| 47187 | 9893            | 9994  |    | 6979  | 7274      | 12371 | 12040 | 12921 | 12841                                                   | Bacteria | Firmicutes | Bacilli | Bacillales | Staphylococcaceae | Staphylococcus | unclassified                |
| 47188 | 11963           | 12288 |    | 10326 | 11186     | 12454 | 12306 | 13172 | 13025                                                   | Bacteria | Firmicutes | Bacilli | Bacillales | Staphylococcaceae | Staphylococcus | unclassified                |
| 47243 | 10456           | 11165 |    | 8177  | 7639      | 13603 | 13096 | 13936 | 13811                                                   | Bacteria | Firmicutes | Bacilli | Bacillales | Staphylococcaceae | Staphylococcus | unclassified                |
| 47246 | 9114            | 9712  |    | 6488  | 6955      | 12329 | 11907 | 12887 | 12945                                                   | Bacteria | Firmicutes | Bacilli | Bacillales | Staphylococcaceae | Staphylococcus | unclassified                |
| 47248 | 10827           | 10827 |    | 8624  | 8821      | 13567 | 13299 | 13819 | 13841                                                   | Bacteria | Firmicutes | Bacilli | Bacillales | Staphylococcaceae | Staphylococcus | unclassified                |
| 47296 | 10685           | 10311 |    | 7177  | 7594      | 13399 | 12781 | 13781 | 13575                                                   | Bacteria | Firmicutes | Bacilli | Bacillales | Staphylococcaceae | Staphylococcus | unclassified                |
| 47327 | 10112           | 10262 |    | 6577  | 6924      | 13036 | 12257 | 13494 | 13187                                                   | Bacteria | Firmicutes | Bacilli | Bacillales | Staphylococcaceae | Staphylococcus | unclassified                |
| 47338 | 10612           | 10689 |    | 7591  | 7403      | 13461 | 12858 | 13774 | 13555                                                   | Bacteria | Firmicutes | Bacilli | Bacillales | Staphylococcaceae | Staphylococcus | unclassified                |
| 47357 | 10475           | 9546  |    | 6751  | 7957      | 12865 | 12447 | 13439 | 13307                                                   | Bacteria | Firmicutes | Bacilli | Bacillales | Staphylococcaceae | Staphylococcus | unclassified                |
| 47476 | 9317            | 9411  |    | 7384  | 7441      | 12692 | 12405 | 13087 | 13066                                                   | Bacteria | Firmicutes | Bacilli | Bacillales | Staphylococcaceae | Staphylococcus | unclassified                |
| 47479 | 10507           | 10557 |    | 8656  | 7737      | 12798 | 12389 | 13483 | 13199                                                   | Bacteria | Firmicutes | Bacilli | Bacillales | Staphylococcaceae | Staphylococcus | unclassified                |
| 47519 | 11286           | 11286 |    | 10513 | 10316     | 13227 | 13275 | 13617 | 13734                                                   | Bacteria | Firmicutes | Bacilli | Bacillales | Staphylococcaceae | Staphylococcus | unclassified                |
| 47528 | 10464           | 11973 |    | 8976  | 8315      | 13267 | 12853 | 13627 | 13681                                                   | Bacteria | Firmicutes | Bacilli | Bacillales | Staphylococcaceae | Staphylococcus | unclassified                |
| 47544 | 10536           | 10793 |    | 6403  | 7046      | 13415 | 12647 | 13728 | 13584                                                   | Bacteria | Firmicutes | Bacilli | Bacillales | Staphylococcaceae | Staphylococcus | unclassified                |
| 47626 | 9432            | 8990  |    | 6235  | 6863      | 12291 | 11416 | 12552 | 12778                                                   | Bacteria | Firmicutes | Bacilli | Bacillales | Staphylococcaceae | Staphylococcus | unclassified                |
| 47663 | 10585           | 10343 |    | 7493  | 7473      | 13164 | 12535 | 13561 | 13328                                                   | Bacteria | Firmicutes | Bacilli | Bacillales | Staphylococcaceae | Staphylococcus | unclassified                |
| 47676 | 10494           | 9493  |    | 6632  | 7584      | 12964 | 12418 | 13422 | 13270                                                   | Bacteria | Firmicutes | Bacilli | Bacillales | Staphylococcaceae | Staphylococcus | unclassified                |
| 47728 | 10734           | 10295 |    | 7269  | 7412      | 13460 | 12835 | 13763 | 13586                                                   | Bacteria | Firmicutes | Bacilli | Bacillales | Staphylococcaceae | Staphylococcus | unclassified                |
| 47766 | 8939            | 10218 |    | 8032  | 7671      | 12860 | 12459 | 13143 | 12831                                                   | Bacteria | Firmicutes | Bacilli | Bacillales | Staphylococcaceae | Staphylococcus | unclassified                |
| 47821 | 10248           | 10469 |    | 7708  | 8276      | 13097 | 13097 | 13439 | 13656                                                   | Bacteria | Firmicutes | Bacilli | Bacillales | Staphylococcaceae | Staphylococcus | unclassified                |
| 47841 | 10072           | 9155  |    |       |           |       |       |       |                                                         |          |            |         |            |                   |                |                             |

Table S6 (part 1): Hy5cores of OTUs that were called present in at least one of the samples. Taxonomic classifications are based on PhyloChip taxonomy (derived from GreenGenes). Please note, that data presented here was rank normalized before performing statistical analyses presented in the manuscript.

| OTU   | Sample ID (PMA) |       |       |       |       | Sample ID |       |       |          |            | taxonomic classification of representative rOTU cluster |                 |                  |  |  |  |  |  |  |               | genus                          | species |
|-------|-----------------|-------|-------|-------|-------|-----------|-------|-------|----------|------------|---------------------------------------------------------|-----------------|------------------|--|--|--|--|--|--|---------------|--------------------------------|---------|
|       | UR              | PMA   | CO    | PMA   | CRS   | UR        | CO    | CRS   | kingdom  | phylum     | class                                                   | order           | family           |  |  |  |  |  |  |               |                                |         |
| 71936 | 10710           | 10770 | 10561 | 7050  | 11780 | 10008     | 10273 | 10277 | Bacteria | Firmicutes | Bacilli                                                 | Lactobacillales | Lactobacillaceae |  |  |  |  |  |  | Lactobacillus | unclassified                   |         |
| 71954 | 8930            | 8539  | 7930  | 7793  | 12580 | 11047     | 10447 | 11179 | Bacteria | Firmicutes | Bacilli                                                 | Lactobacillales | Lactobacillaceae |  |  |  |  |  |  | Lactobacillus | unclassified                   |         |
| 71968 | 9146            | 8140  | 7826  | 7756  | 11613 | 10212     | 10049 | 10304 | Bacteria | Firmicutes | Bacilli                                                 | Lactobacillales | Lactobacillaceae |  |  |  |  |  |  | Lactobacillus | unclassified                   |         |
| 72006 | 9184            | 9332  | 7938  | 8937  | 11881 | 11571     | 11486 | 11728 | Bacteria | Firmicutes | Bacilli                                                 | Lactobacillales | Lactobacillaceae |  |  |  |  |  |  | Lactobacillus | unclassified                   |         |
| 72042 | 9314            | 7329  | 7131  | 7287  | 12984 | 11645     | 11385 | 11511 | Bacteria | Firmicutes | Bacilli                                                 | Lactobacillales | Lactobacillaceae |  |  |  |  |  |  | Lactobacillus | unclassified                   |         |
| 72132 | 10368           | 10721 | 9978  | 9146  | 12835 | 11315     | 12618 | 13546 | Bacteria | Firmicutes | Bacilli                                                 | Lactobacillales | Lactobacillaceae |  |  |  |  |  |  | Lactobacillus | unclassified                   |         |
| 72166 | 9512            | 7373  | 7236  | 7323  | 13004 | 11624     | 11460 | 11546 | Bacteria | Firmicutes | Bacilli                                                 | Lactobacillales | Lactobacillaceae |  |  |  |  |  |  | Lactobacillus | unclassified                   |         |
| 72197 | 8922            | 8337  | 7898  | 7324  | 12339 | 12256     | 12367 | 12573 | Bacteria | Firmicutes | Bacilli                                                 | Lactobacillales | Lactobacillaceae |  |  |  |  |  |  | Lactobacillus | unclassified                   |         |
| 72201 | 9615            | 9272  | 9062  | 8030  | 12611 | 12664     | 12494 | 13024 | Bacteria | Firmicutes | Bacilli                                                 | Lactobacillales | Lactobacillaceae |  |  |  |  |  |  | Lactobacillus | unclassified                   |         |
| 72285 | 8761            | 10763 | 8251  | 7673  | 12642 | 12878     | 12939 | 12961 | Bacteria | Firmicutes | Bacilli                                                 | Lactobacillales | Lactobacillaceae |  |  |  |  |  |  | Lactobacillus | unclassified                   |         |
| 72563 | 9653            | 10156 | 9218  | 8533  | 11786 | 11835     | 12545 | 12172 | Bacteria | Firmicutes | Bacilli                                                 | Lactobacillales | Lactobacillaceae |  |  |  |  |  |  | Lactobacillus | unclassified                   |         |
| 72597 | 9344            | 7413  | 7038  | 7324  | 12521 | 11999     | 11770 | 11794 | Bacteria | Firmicutes | Bacilli                                                 | Lactobacillales | Lactobacillaceae |  |  |  |  |  |  | Lactobacillus | unclassified                   |         |
| 72637 | 8233            | 7529  | 6213  | 6946  | 11513 | 11475     | 11639 | 11481 | Bacteria | Firmicutes | Bacilli                                                 | Lactobacillales | Lactobacillaceae |  |  |  |  |  |  | Lactobacillus | unclassified                   |         |
| 72729 | 8320            | 8910  | 7202  | 6934  | 10944 | 11188     | 12371 | 11224 | Bacteria | Firmicutes | Bacilli                                                 | Lactobacillales | Lactobacillaceae |  |  |  |  |  |  | Lactobacillus | unclassified                   |         |
| 72761 | 11480           | 11815 | 11311 | 10443 | 12568 | 12711     | 13031 | 12964 | Bacteria | Firmicutes | Bacilli                                                 | Lactobacillales | Lactobacillaceae |  |  |  |  |  |  | Lactobacillus | unclassified                   |         |
| 72839 | 11840           | 12270 | 11724 | 10483 | 13360 | 13416     | 13233 | 13939 | Bacteria | Firmicutes | Bacilli                                                 | Lactobacillales | Lactobacillaceae |  |  |  |  |  |  | Lactobacillus | unclassified                   |         |
| 72855 | 8919            | 6966  | 6520  | 7092  | 12698 | 11262     | 11050 | 11030 | Bacteria | Firmicutes | Bacilli                                                 | Lactobacillales | Lactobacillaceae |  |  |  |  |  |  | Lactobacillus | unclassified                   |         |
| 72884 | 8927            | 10092 | 7697  | 7720  | 11837 | 12140     | 12692 | 12476 | Bacteria | Firmicutes | Bacilli                                                 | Lactobacillales | Lactobacillaceae |  |  |  |  |  |  | Lactobacillus | unclassified                   |         |
| 72916 | 8351            | 8654  | 7291  | 6834  | 10922 | 11126     | 12320 | 11164 | Bacteria | Firmicutes | Bacilli                                                 | Lactobacillales | Lactobacillaceae |  |  |  |  |  |  | Lactobacillus | unclassified                   |         |
| 71861 | 9114            | 7973  | 7467  | 6832  | 12444 | 12449     | 12258 | 12196 | Bacteria | Firmicutes | Bacilli                                                 | Lactobacillales | Leuconostocaceae |  |  |  |  |  |  | Leuconostoc   | citreum                        |         |
| 71916 | 9232            | 8327  | 7191  | 6805  | 12431 | 12255     | 12106 | 11974 | Bacteria | Firmicutes | Bacilli                                                 | Lactobacillales | Leuconostocaceae |  |  |  |  |  |  | Leuconostoc   | citreum                        |         |
| 72147 | 9292            | 8486  | 7549  | 6959  | 12700 | 12578     | 12368 | 12410 | Bacteria | Firmicutes | Bacilli                                                 | Lactobacillales | Leuconostocaceae |  |  |  |  |  |  | Leuconostoc   | citreum                        |         |
| 72200 | 10092           | 10819 | 9761  | 9573  | 12634 | 12860     | 12776 | 12794 | Bacteria | Firmicutes | Bacilli                                                 | Lactobacillales | Leuconostocaceae |  |  |  |  |  |  | Leuconostoc   | citreum                        |         |
| 72453 | 8878            | 7763  | 7563  | 7001  | 12326 | 12197     | 12038 | 11943 | Bacteria | Firmicutes | Bacilli                                                 | Lactobacillales | Leuconostocaceae |  |  |  |  |  |  | Leuconostoc   | citreum                        |         |
| 72610 | 8877            | 8016  | 7551  | 6930  | 12361 | 12289     | 12113 | 12047 | Bacteria | Firmicutes | Bacilli                                                 | Lactobacillales | Leuconostocaceae |  |  |  |  |  |  | Leuconostoc   | citreum                        |         |
| 71907 | 8930            | 7984  | 7642  | 6937  | 12369 | 12373     | 12044 | 11996 | Bacteria | Firmicutes | Bacilli                                                 | Lactobacillales | Leuconostocaceae |  |  |  |  |  |  | Leuconostoc   | unclassified                   |         |
| 72629 | 8426            | 8636  | 7369  | 7862  | 12524 | 12018     | 12013 | 12018 | Bacteria | Firmicutes | Bacilli                                                 | Lactobacillales | Leuconostocaceae |  |  |  |  |  |  | Leuconostoc   | unclassified                   |         |
| 72646 | 8706            | 8096  | 7660  | 7044  | 12141 | 12288     | 12113 | 11903 | Bacteria | Firmicutes | Bacilli                                                 | Lactobacillales | Leuconostocaceae |  |  |  |  |  |  | Leuconostoc   | unclassified                   |         |
| 72927 | 9613            | 8178  | 8165  | 8540  | 12020 | 12227     | 12177 | 12009 | Bacteria | Firmicutes | Bacilli                                                 | Lactobacillales | Leuconostocaceae |  |  |  |  |  |  | Leuconostoc   | unclassified                   |         |
| 72987 | 9194            | 8399  | 7275  | 7645  | 12202 | 11637     | 11823 | 11616 | Bacteria | Firmicutes | Bacilli                                                 | Lactobacillales | Leuconostocaceae |  |  |  |  |  |  | Leuconostoc   | unclassified                   |         |
| 42814 | 8280            | 7386  | 7045  | 7305  | 10980 | 12379     | 11050 | 11031 | Bacteria | Firmicutes | Bacilli                                                 | Lactobacillales | Streptococcaceae |  |  |  |  |  |  | Lactococcus   | Lactococcus lactis             |         |
| 42908 | 9194            | 7961  | 7570  | 7553  | 11323 | 12520     | 11595 | 11500 | Bacteria | Firmicutes | Bacilli                                                 | Lactobacillales | Streptococcaceae |  |  |  |  |  |  | Lactococcus   | Lactococcus lactis             |         |
| 43687 | 10887           | 10832 | 10732 | 10126 | 10745 | 12713     | 11680 | 11613 | Bacteria | Firmicutes | Bacilli                                                 | Lactobacillales | Streptococcaceae |  |  |  |  |  |  | Lactococcus   | Lactococcus lactis             |         |
| 45762 | 8067            | 7212  | 6735  | 7388  | 10759 | 11726     | 11657 | 11076 | Bacteria | Firmicutes | Bacilli                                                 | Lactobacillales | Streptococcaceae |  |  |  |  |  |  | Streptococcus | Streptococcus cristatus        |         |
| 43888 | 8095            | 6876  | 6652  | 7446  | 12144 | 13013     | 12884 | 12561 | Bacteria | Firmicutes | Bacilli                                                 | Lactobacillales | Streptococcaceae |  |  |  |  |  |  | Streptococcus | Streptococcus cristatus        |         |
| 44666 | 7502            | 6640  | 6248  | 6762  | 11443 | 12330     | 12240 | 11943 | Bacteria | Firmicutes | Bacilli                                                 | Lactobacillales | Streptococcaceae |  |  |  |  |  |  | Streptococcus | Streptococcus infantis         |         |
| 44884 | 7981            | 6925  | 5446  | 6510  | 11544 | 12155     | 12207 | 12309 | Bacteria | Firmicutes | Bacilli                                                 | Lactobacillales | Streptococcaceae |  |  |  |  |  |  | Streptococcus | Streptococcus infantis         |         |
| 44432 | 7751            | 6832  | 6121  | 6601  | 11455 | 12182     | 11952 | 11974 | Bacteria | Firmicutes | Bacilli                                                 | Lactobacillales | Streptococcaceae |  |  |  |  |  |  | Streptococcus | Streptococcus oralis           |         |
| 44534 | 7779            | 7058  | 6187  | 6834  | 11682 | 12433     | 12180 | 12123 | Bacteria | Firmicutes | Bacilli                                                 | Lactobacillales | Streptococcaceae |  |  |  |  |  |  | Streptococcus | Streptococcus oralis           |         |
| 44562 | 8218            | 7386  | 6655  | 6935  | 11806 | 12470     | 12361 | 12216 | Bacteria | Firmicutes | Bacilli                                                 | Lactobacillales | Streptococcaceae |  |  |  |  |  |  | Streptococcus | Streptococcus oralis           |         |
| 44745 | 8358            | 7840  | 7771  | 6870  | 11919 | 12463     | 12465 | 12424 | Bacteria | Firmicutes | Bacilli                                                 | Lactobacillales | Streptococcaceae |  |  |  |  |  |  | Streptococcus | Streptococcus oralis           |         |
| 44153 | 8332            | 7340  | 7013  | 7307  | 11896 | 12567     | 12426 | 12386 | Bacteria | Firmicutes | Bacilli                                                 | Lactobacillales | Streptococcaceae |  |  |  |  |  |  | Streptococcus | Streptococcus pseudopneumoniae |         |
| 44224 | 8434            | 7835  | 7481  | 7399  | 12112 | 12760     | 12629 | 12530 | Bacteria | Firmicutes | Bacilli                                                 | Lactobacillales | Streptococcaceae |  |  |  |  |  |  | Streptococcus | Streptococcus pseudopneumoniae |         |
| 44243 | 8219            | 7091  | 6976  | 7492  | 12115 | 12453     | 12258 | 12259 | Bacteria | Firmicutes | Bacilli                                                 | Lactobacillales | Streptococcaceae |  |  |  |  |  |  | Streptococcus | Streptococcus pseudopneumoniae |         |
| 44383 | 7701            | 6617  | 6499  | 7138  | 11586 | 12225     | 12038 | 11815 | Bacteria | Firmicutes | Bacilli                                                 | Lactobacillales | Streptococcaceae |  |  |  |  |  |  | Streptococcus | Streptococcus pseudopneumoniae |         |
| 44422 | 8071            | 6695  | 6469  | 6734  | 11631 | 12217     | 11993 | 11893 | Bacteria | Firmicutes | Bacilli                                                 | Lactobacillales | Streptococcaceae |  |  |  |  |  |  | Streptococcus | Streptococcus pseudopneumoniae |         |
| 44482 | 7912            | 6456  | 6609  | 6949  | 11611 | 12374     | 12255 | 11976 | Bacteria | Firmicutes | Bacilli                                                 | Lactobacillales | Streptococcaceae |  |  |  |  |  |  | Streptococcus | Streptococcus pseudopneumoniae |         |
| 44677 | 7148            | 7254  | 5822  | 6501  | 12060 | 12232     | 12102 | 12096 | Bacteria | Firmicutes | Bacilli                                                 | Lactobacillales | Streptococcaceae |  |  |  |  |  |  | Streptococcus | Streptococcus pseudopneumoniae |         |
| 44743 | 8073            | 7100  | 6985  | 6896  | 11885 | 12437     | 12271 | 12156 | Bacteria | Firmicutes | Bacilli                                                 | Lactobacillales | Streptococcaceae |  |  |  |  |  |  | Streptococcus | Streptococcus pseudopneumoniae |         |
| 44789 | 8009            | 7077  | 6977  | 6991  | 11996 | 12610     | 12401 | 12256 | Bacteria | Firmicutes | Bacilli                                                 | Lactobacillales | Streptococcaceae |  |  |  |  |  |  | Streptococcus | Streptococcus pseudopneumoniae |         |
| 44928 | 7897            | 6974  | 6812  | 7052  | 11491 | 12274     | 12100 | 11829 | Bacteria | Firmicutes | Bacilli                                                 | Lactobacillales | Streptococcaceae |  |  |  |  |  |  | Streptococcus | Streptococcus pseudopneumoniae |         |
| 44997 | 7932            | 6730  | 6644  | 7083  | 11690 | 12458     | 12316 | 12041 | Bacteria | Firmicutes | Bacilli                                                 | Lactobacillales | Streptococcaceae |  |  |  |  |  |  | Streptococcus | Streptococcus pseudopneumoniae |         |
| 45008 | 8192            | 7245  | 6877  | 7210  | 11922 | 12481     | 12265 | 12221 | Bacteria | Firmicutes | Bacilli                                                 | Lactobacillales | Streptococcaceae |  |  |  |  |  |  | Streptococcus | Streptococcus pseudopneumoniae |         |
| 45052 | 8310            | 7810  | 7405  | 7348  | 12272 | 12902     | 12751 | 12699 | Bacteria | Firmicutes | Bacilli                                                 | Lactobacillales | Streptococcaceae |  |  |  |  |  |  | Streptococcus | Streptococcus pseudopneumoniae |         |
| 45151 | 8657            | 8746  | 8239  | 7540  | 11828 | 12478     | 12210 | 12216 | Bacteria | Firmicutes | Bacilli                                                 | Lactobacillales | Streptococcaceae |  |  |  |  |  |  | Streptococcus | Streptococcus pseudopneumoniae |         |
| 45269 | 8360            | 7821  | 7438  | 7300  | 11985 | 12645     | 12516 | 12456 | Bacteria | Firmicutes | Bacilli                                                 | Lactobacillales | Streptococcaceae |  |  |  |  |  |  | Streptococcus | Streptococcus pseudopneumoniae |         |
| 45286 | 8059            | 7043  | 7005  | 6992  | 11957 | 12572     | 12435 | 12311 | Bacteria | Firmicutes | Bacilli                                                 | Lactobacillales | Streptococcaceae |  |  |  |  |  |  | Streptococcus | Streptococcus pseudopneumoniae |         |
| 45299 | 8450            | 7872  | 7469  | 7174  | 11838 | 12570     | 12420 | 12308 | Bacteria | Firmicutes | Bacilli                                                 | Lactobacillales | Streptococcaceae |  |  |  |  |  |  | Streptococcus | Streptococcus pseudopneumoniae |         |
| 45304 | 8214            | 6898  | 6936  | 7499  | 12107 | 12425     | 12246 | 12263 | Bacteria | Firmicutes | Bacilli                                                 | Lactobacillales | Streptococcaceae |  |  |  |  |  |  | Streptococcus | Streptococcus pseudopneumoniae |         |
| 45321 | 8220            | 6845  | 6536  | 7070  | 11836 | 12448     | 12472 | 12146 | Bacteria | Firmicutes | Bacilli                                                 | Lactobacillales | Streptococcaceae |  |  |  |  |  |  | Streptococcus | Streptococcus pseudopneumoniae |         |
| 45343 | 8421            | 7623  | 7206  | 7388  | 11932 | 12492     | 12320 | 12267 | Bacteria | Firmicutes | Bacilli                                                 | Lactobacillales | Streptococcaceae |  |  |  |  |  |  | Streptococcus | Streptococcus pseudopneumoniae |         |
| 45440 | 8097            | 7246  | 7007  | 6896  | 11634 | 12258     | 12116 | 12016 | Bacteria | Firmicutes | Bacilli                                                 | Lactobacillales | Streptococcaceae |  |  |  |  |  |  | Streptococcus | Streptococcus pseudopneumoniae |         |
| 45507 | 8883            | 9077  | 7665  | 7172  | 11458 | 12387     | 12351 | 12271 | Bacteria | Firmicutes | Bacilli                                                 | Lactobacillales | Streptococcaceae |  |  |  |  |  |  | Streptococcus | Streptococcus pseudopneumoniae |         |
| 45508 | 8409            | 7817  | 7465  | 7198  | 12047 | 12706     | 12569 | 12470 | Bacteria | Firmicutes | Bacilli                                                 | Lactobacillales | Streptococcaceae |  |  |  |  |  |  | Streptococcus | Streptococcus pseudopneumoniae |         |
| 45543 | 7660            | 6530  | 6534  | 6436  | 11835 | 12490     | 12371 | 12276 | Bacteria | Firmicutes | Bacilli                                                 | Lactobacillales | Streptococcaceae |  |  |  |  |  |  | Streptococcus | Streptococcus pseudopneumoniae |         |
| 45564 | 8129            | 7086  | 6968  | 7069  | 11071 | 11767     | 11404 | 11435 | Bacteria | Firmicutes | Bacilli                                                 | Lactobacillales | Streptococcaceae |  |  |  |  |  |  | Streptococcus | Streptococcus pseudopneumoniae |         |
| 45592 | 8382            | 7322  | 6998  | 7150  | 11891 | 12470     | 12318 | 12294 | Bacteria | Firmicutes | Bacilli                                                 | Lactobacillales | Streptococcaceae |  |  |  |  |  |  | Streptococcus |                                |         |

Table S6 (part II): Hy5Scores of OTUs that were called present in at least one of the samples. Taxonomic classifications are based on PhyloChip taxonomy (derived from GreenGenes). Please note, that data presented here was rank normalized before performing statistical analyses presented in the manuscript.

| OTU   | Sample ID (PMA) |        |         |         | Sample ID |       |       |       | taxonomic classification of representative rOTU cluster |            |         |                 |                  |               |              |               |              |               | genus        | species |
|-------|-----------------|--------|---------|---------|-----------|-------|-------|-------|---------------------------------------------------------|------------|---------|-----------------|------------------|---------------|--------------|---------------|--------------|---------------|--------------|---------|
|       | UR_PMA          | CR_PMA | CRS_PMA | CRS_PMA | UR        | CO    | CRS   | CRS   | kingdom                                                 | phylum     | class   | order           | family           | genus         | species      | genus         | species      |               |              |         |
| 44363 | 8279            | 7645   | 6482    | 6722    | 11281     | 12314 | 12158 | 12153 | Bacteria                                                | Firmicutes | Bacilli | Lactobacillales | Streptococcaceae | Streptococcus | unclassified | Streptococcus | unclassified | Streptococcus | unclassified |         |
| 44380 | 8386            | 8674   | 7032    | 6692    | 12471     | 12882 | 12783 | 12640 | Bacteria                                                | Firmicutes | Bacilli | Lactobacillales | Streptococcaceae | Streptococcus | unclassified | Streptococcus | unclassified | Streptococcus | unclassified |         |
| 44396 | 8286            | 7841   | 6573    | 7163    | 10648     | 11892 | 11768 | 11422 | Bacteria                                                | Firmicutes | Bacilli | Lactobacillales | Streptococcaceae | Streptococcus | unclassified | Streptococcus | unclassified | Streptococcus | unclassified |         |
| 44452 | 7997            | 6523   | 6343    | 7012    | 11678     | 12258 | 12218 | 11930 | Bacteria                                                | Firmicutes | Bacilli | Lactobacillales | Streptococcaceae | Streptococcus | unclassified | Streptococcus | unclassified | Streptococcus | unclassified |         |
| 44466 | 7746            | 6540   | 6222    | 6418    | 11204     | 11773 | 12233 | 11804 | Bacteria                                                | Firmicutes | Bacilli | Lactobacillales | Streptococcaceae | Streptococcus | unclassified | Streptococcus | unclassified | Streptococcus | unclassified |         |
| 44501 | 8005            | 6793   | 6782    | 7007    | 11406     | 12226 | 12107 | 11829 | Bacteria                                                | Firmicutes | Bacilli | Lactobacillales | Streptococcaceae | Streptococcus | unclassified | Streptococcus | unclassified | Streptococcus | unclassified |         |
| 44511 | 8728            | 8603   | 8164    | 7292    | 11437     | 12317 | 12391 | 12157 | Bacteria                                                | Firmicutes | Bacilli | Lactobacillales | Streptococcaceae | Streptococcus | unclassified | Streptococcus | unclassified | Streptococcus | unclassified |         |
| 44516 | 8261            | 6851   | 6479    | 6729    | 11147     | 12020 | 11937 | 11667 | Bacteria                                                | Firmicutes | Bacilli | Lactobacillales | Streptococcaceae | Streptococcus | unclassified | Streptococcus | unclassified | Streptococcus | unclassified |         |
| 44533 | 8445            | 7477   | 7032    | 6854    | 10985     | 12046 | 11947 | 11585 | Bacteria                                                | Firmicutes | Bacilli | Lactobacillales | Streptococcaceae | Streptococcus | unclassified | Streptococcus | unclassified | Streptococcus | unclassified |         |
| 44552 | 8447            | 7658   | 6805    | 6873    | 11255     | 12284 | 12151 | 11850 | Bacteria                                                | Firmicutes | Bacilli | Lactobacillales | Streptococcaceae | Streptococcus | unclassified | Streptococcus | unclassified | Streptococcus | unclassified |         |
| 44553 | 8515            | 7603   | 6803    | 7261    | 11081     | 11846 | 11833 | 11463 | Bacteria                                                | Firmicutes | Bacilli | Lactobacillales | Streptococcaceae | Streptococcus | unclassified | Streptococcus | unclassified | Streptococcus | unclassified |         |
| 44554 | 8013            | 7118   | 6991    | 7129    | 11268     | 12245 | 12083 | 11852 | Bacteria                                                | Firmicutes | Bacilli | Lactobacillales | Streptococcaceae | Streptococcus | unclassified | Streptococcus | unclassified | Streptococcus | unclassified |         |
| 44565 | 8402            | 7487   | 7427    | 7288    | 11923     | 12625 | 12494 | 12297 | Bacteria                                                | Firmicutes | Bacilli | Lactobacillales | Streptococcaceae | Streptococcus | unclassified | Streptococcus | unclassified | Streptococcus | unclassified |         |
| 44574 | 8036            | 6807   | 6823    | 6938    | 11261     | 12012 | 11738 | 11478 | Bacteria                                                | Firmicutes | Bacilli | Lactobacillales | Streptococcaceae | Streptococcus | unclassified | Streptococcus | unclassified | Streptococcus | unclassified |         |
| 44590 | 8527            | 8184   | 7092    | 7270    | 11342     | 12363 | 12153 | 11930 | Bacteria                                                | Firmicutes | Bacilli | Lactobacillales | Streptococcaceae | Streptococcus | unclassified | Streptococcus | unclassified | Streptococcus | unclassified |         |
| 44604 | 8000            | 6934   | 5666    | 6530    | 11567     | 12248 | 12367 | 12138 | Bacteria                                                | Firmicutes | Bacilli | Lactobacillales | Streptococcaceae | Streptococcus | unclassified | Streptococcus | unclassified | Streptococcus | unclassified |         |
| 44608 | 8326            | 7423   | 6886    | 6821    | 11125     | 12141 | 11908 | 11752 | Bacteria                                                | Firmicutes | Bacilli | Lactobacillales | Streptococcaceae | Streptococcus | unclassified | Streptococcus | unclassified | Streptococcus | unclassified |         |
| 44623 | 7804            | 6979   | 5866    | 6677    | 11560     | 12191 | 11846 | 11899 | Bacteria                                                | Firmicutes | Bacilli | Lactobacillales | Streptococcaceae | Streptococcus | unclassified | Streptococcus | unclassified | Streptococcus | unclassified |         |
| 44633 | 8176            | 7142   | 6840    | 6712    | 11040     | 12070 | 12093 | 11745 | Bacteria                                                | Firmicutes | Bacilli | Lactobacillales | Streptococcaceae | Streptococcus | unclassified | Streptococcus | unclassified | Streptococcus | unclassified |         |
| 44644 | 8314            | 8546   | 7153    | 7559    | 11399     | 11997 | 11475 | 11680 | Bacteria                                                | Firmicutes | Bacilli | Lactobacillales | Streptococcaceae | Streptococcus | unclassified | Streptococcus | unclassified | Streptococcus | unclassified |         |
| 44647 | 8262            | 7697   | 7057    | 7242    | 11669     | 12387 | 12313 | 12130 | Bacteria                                                | Firmicutes | Bacilli | Lactobacillales | Streptococcaceae | Streptococcus | unclassified | Streptococcus | unclassified | Streptococcus | unclassified |         |
| 44651 | 7891            | 7148   | 6480    | 6722    | 10830     | 11832 | 11605 | 11660 | Bacteria                                                | Firmicutes | Bacilli | Lactobacillales | Streptococcaceae | Streptococcus | unclassified | Streptococcus | unclassified | Streptococcus | unclassified |         |
| 44673 | 8056            | 6794   | 6819    | 7019    | 11794     | 12244 | 12043 | 11954 | Bacteria                                                | Firmicutes | Bacilli | Lactobacillales | Streptococcaceae | Streptococcus | unclassified | Streptococcus | unclassified | Streptococcus | unclassified |         |
| 44680 | 9699            | 9416   | 9522    | 9557    | 11694     | 12332 | 12296 | 12228 | Bacteria                                                | Firmicutes | Bacilli | Lactobacillales | Streptococcaceae | Streptococcus | unclassified | Streptococcus | unclassified | Streptococcus | unclassified |         |
| 44681 | 7745            | 6536   | 5892    | 6619    | 11747     | 12256 | 12195 | 12301 | Bacteria                                                | Firmicutes | Bacilli | Lactobacillales | Streptococcaceae | Streptococcus | unclassified | Streptococcus | unclassified | Streptococcus | unclassified |         |
| 44688 | 9566            | 9068   | 8426    | 7896    | 11652     | 11996 | 11709 | 11901 | Bacteria                                                | Firmicutes | Bacilli | Lactobacillales | Streptococcaceae | Streptococcus | unclassified | Streptococcus | unclassified | Streptococcus | unclassified |         |
| 44701 | 8325            | 8403   | 7335    | 7263    | 11947     | 12316 | 12399 | 12116 | Bacteria                                                | Firmicutes | Bacilli | Lactobacillales | Streptococcaceae | Streptococcus | unclassified | Streptococcus | unclassified | Streptococcus | unclassified |         |
| 44721 | 9961            | 10361  | 8819    | 8348    | 12643     | 12899 | 12804 | 12772 | Bacteria                                                | Firmicutes | Bacilli | Lactobacillales | Streptococcaceae | Streptococcus | unclassified | Streptococcus | unclassified | Streptococcus | unclassified |         |
| 44751 | 8413            | 7925   | 7345    | 7374    | 11748     | 12451 | 12329 | 12203 | Bacteria                                                | Firmicutes | Bacilli | Lactobacillales | Streptococcaceae | Streptococcus | unclassified | Streptococcus | unclassified | Streptococcus | unclassified |         |
| 44757 | 8258            | 7795   | 6542    | 6504    | 11397     | 12376 | 11759 | 11487 | Bacteria                                                | Firmicutes | Bacilli | Lactobacillales | Streptococcaceae | Streptococcus | unclassified | Streptococcus | unclassified | Streptococcus | unclassified |         |
| 44767 | 8421            | 7559   | 6829    | 6989    | 11071     | 12145 | 12022 | 11666 | Bacteria                                                | Firmicutes | Bacilli | Lactobacillales | Streptococcaceae | Streptococcus | unclassified | Streptococcus | unclassified | Streptococcus | unclassified |         |
| 44770 | 8007            | 7207   | 6949    | 6776    | 11545     | 12280 | 12078 | 11953 | Bacteria                                                | Firmicutes | Bacilli | Lactobacillales | Streptococcaceae | Streptococcus | unclassified | Streptococcus | unclassified | Streptococcus | unclassified |         |
| 44778 | 7709            | 6698   | 6045    | 6619    | 11491     | 12161 | 12017 | 12085 | Bacteria                                                | Firmicutes | Bacilli | Lactobacillales | Streptococcaceae | Streptococcus | unclassified | Streptococcus | unclassified | Streptococcus | unclassified |         |
| 44792 | 8277            | 7943   | 6702    | 7919    | 11973     | 12452 | 12453 | 12460 | Bacteria                                                | Firmicutes | Bacilli | Lactobacillales | Streptococcaceae | Streptococcus | unclassified | Streptococcus | unclassified | Streptococcus | unclassified |         |
| 44813 | 8217            | 8836   | 7086    | 6941    | 11865     | 11649 | 12123 | 12376 | Bacteria                                                | Firmicutes | Bacilli | Lactobacillales | Streptococcaceae | Streptococcus | unclassified | Streptococcus | unclassified | Streptococcus | unclassified |         |
| 44816 | 7855            | 6470   | 6526    | 6669    | 12025     | 12506 | 12384 | 12337 | Bacteria                                                | Firmicutes | Bacilli | Lactobacillales | Streptococcaceae | Streptococcus | unclassified | Streptococcus | unclassified | Streptococcus | unclassified |         |
| 44820 | 7770            | 6926   | 5912    | 6678    | 11669     | 12182 | 11825 | 11912 | Bacteria                                                | Firmicutes | Bacilli | Lactobacillales | Streptococcaceae | Streptococcus | unclassified | Streptococcus | unclassified | Streptococcus | unclassified |         |
| 44823 | 8485            | 7605   | 7215    | 7539    | 11937     | 12546 | 12384 | 12273 | Bacteria                                                | Firmicutes | Bacilli | Lactobacillales | Streptococcaceae | Streptococcus | unclassified | Streptococcus | unclassified | Streptococcus | unclassified |         |
| 44826 | 8093            | 7212   | 6232    | 6519    | 11157     | 12119 | 11965 | 11970 | Bacteria                                                | Firmicutes | Bacilli | Lactobacillales | Streptococcaceae | Streptococcus | unclassified | Streptococcus | unclassified | Streptococcus | unclassified |         |
| 44829 | 7960            | 7291   | 6647    | 6812    | 10968     | 11921 | 11715 | 11745 | Bacteria                                                | Firmicutes | Bacilli | Lactobacillales | Streptococcaceae | Streptococcus | unclassified | Streptococcus | unclassified | Streptococcus | unclassified |         |
| 44837 | 8346            | 7333   | 6213    | 6921    | 11186     | 12213 | 12122 | 11789 | Bacteria                                                | Firmicutes | Bacilli | Lactobacillales | Streptococcaceae | Streptococcus | unclassified | Streptococcus | unclassified | Streptococcus | unclassified |         |
| 44852 | 6681            | 9195   | 7251    | 6962    | 11532     | 12207 | 12245 | 12488 | Bacteria                                                | Firmicutes | Bacilli | Lactobacillales | Streptococcaceae | Streptococcus | unclassified | Streptococcus | unclassified | Streptococcus | unclassified |         |
| 44860 | 8408            | 7832   | 7474    | 7402    | 11965     | 12672 | 12470 | 12392 | Bacteria                                                | Firmicutes | Bacilli | Lactobacillales | Streptococcaceae | Streptococcus | unclassified | Streptococcus | unclassified | Streptococcus | unclassified |         |
| 44896 | 7803            | 6841   | 6374    | 7234    | 12163     | 12817 | 12672 | 12636 | Bacteria                                                | Firmicutes | Bacilli | Lactobacillales | Streptococcaceae | Streptococcus | unclassified | Streptococcus | unclassified | Streptococcus | unclassified |         |
| 44904 | 8488            | 9541   | 7089    | 7002    | 11490     | 11838 | 11976 | 11728 | Bacteria                                                | Firmicutes | Bacilli | Lactobacillales | Streptococcaceae | Streptococcus | unclassified | Streptococcus | unclassified | Streptococcus | unclassified |         |
| 44910 | 8020            | 6952   | 6236    | 6437    | 11504     | 12287 | 12208 | 12302 | Bacteria                                                | Firmicutes | Bacilli | Lactobacillales | Streptococcaceae | Streptococcus | unclassified | Streptococcus | unclassified | Streptococcus | unclassified |         |
| 44911 | 8198            | 7630   | 7053    | 7119    | 11733     | 12319 | 12263 | 12080 | Bacteria                                                | Firmicutes | Bacilli | Lactobacillales | Streptococcaceae | Streptococcus | unclassified | Streptococcus | unclassified | Streptococcus | unclassified |         |
| 44912 | 8514            | 7940   | 7284    | 7095    | 10980     | 12036 | 11889 | 11514 | Bacteria                                                | Firmicutes | Bacilli | Lactobacillales | Streptococcaceae | Streptococcus | unclassified | Streptococcus | unclassified | Streptococcus | unclassified |         |
| 44957 | 7299            | 6747   | 6602    | 6817    | 11653     | 12333 | 12348 | 12102 | Bacteria                                                | Firmicutes | Bacilli | Lactobacillales | Streptococcaceae | Streptococcus | unclassified | Streptococcus | unclassified | Streptococcus | unclassified |         |
| 44958 | 8011            | 6664   | 6752    | 7105    | 11407     | 12234 | 12043 | 11786 | Bacteria                                                | Firmicutes | Bacilli | Lactobacillales | Streptococcaceae | Streptococcus | unclassified | Streptococcus | unclassified | Streptococcus | unclassified |         |
| 44969 | 8607            | 8179   | 7124    | 7338    | 11506     | 12489 | 12301 | 12022 | Bacteria                                                | Firmicutes | Bacilli | Lactobacillales | Streptococcaceae | Streptococcus | unclassified | Streptococcus | unclassified | Streptococcus | unclassified |         |
| 44976 | 9167            | 8233   | 7452    | 7848    | 12207     | 11429 | 11288 | 11614 | Bacteria                                                | Firmicutes | Bacilli | Lactobacillales | Streptococcaceae | Streptococcus | unclassified | Streptococcus | unclassified | Streptococcus | unclassified |         |
| 45005 | 8105            | 7341   | 7245    | 7038    | 11501     | 12482 | 12457 | 12244 | Bacteria                                                | Firmicutes | Bacilli | Lactobacillales | Streptococcaceae | Streptococcus | unclassified | Streptococcus | unclassified | Streptococcus | unclassified |         |
| 45015 | 8427            | 7778   | 7225    | 7212    | 11153     | 11970 | 11842 | 11825 | Bacteria                                                | Firmicutes | Bacilli | Lactobacillales | Streptococcaceae | Streptococcus | unclassified | Streptococcus | unclassified | Streptococcus | unclassified |         |
| 45016 | 7945            | 6671   | 6618    | 6760    | 11571     | 12162 | 11916 | 11817 | Bacteria                                                | Firmicutes | Bacilli | Lactobacillales | Streptococcaceae | Streptococcus | unclassified | Streptococcus | unclassified | Streptococcus | unclassified |         |
| 45053 | 7637            | 6519   | 6534    | 7143    | 11486     | 12157 | 11993 | 11740 | Bacteria                                                | Firmicutes | Bacilli | Lactobacillales | Streptococcaceae | Streptococcus | unclassified | Streptococcus | unclassified | Streptococcus | unclassified |         |
| 45097 | 8207            | 7464   | 6642    | 6639    | 11029     | 11227 | 11617 | 11306 | Bacteria                                                | Firmicutes | Bacilli | Lactobacillales | Streptococcaceae | Streptococcus | unclassified | Streptococcus | unclassified | Streptococcus | unclassified |         |
| 45105 | 8151            | 7243   | 6564    | 6704    | 11196     | 12111 | 12037 | 11727 | Bacteria                                                | Firmicutes | Bacilli | Lactobacillales | Streptococcaceae | Streptococcus | unclassified | Streptococcus | unclassified | Streptococcus | unclassified |         |
| 45111 | 7813            | 7068   | 6490    | 6882    | 11208     | 12108 | 11880 | 11740 | Bacteria                                                | Firmicutes | Bacilli | Lactobacillales | Streptococcaceae | Streptococcus | unclassified | Streptococcus | unclassified | Streptococcus | unclassified |         |
| 45118 | 7947            | 7119   | 6415    | 6787    | 11502     | 12389 | 12232 | 12280 | Bacteria                                                | Firmicutes | Bacilli | Lactobacillales | Streptococcaceae | Streptococcus | unclassified | Streptococcus | unclassified | Streptococcus | unclassified |         |
| 45130 | 7860            | 6689   | 6519    | 6488    | 11941     | 12622 | 12484 | 12468 | Bacteria                                                | Firmicutes | Bacilli | Lactobacillales | Streptococcaceae | Streptococcus | unclassified | Streptococcus | unclassified | Streptococcus | unclassified |         |
| 45131 | 7956            | 6756   | 6614    | 7029    | 11663     | 12324 | 12214 | 1206  | Bacteria                                                | Firmicutes | Bacilli | Lactobacillales | Streptococcaceae | Streptococcus | unclassified | Streptococcus | unclassified | Streptococcus | unclassified |         |
| 45158 | 8401            | 7917   | 6500    | 6629    | 11469     | 12605 | 12423 | 12306 | Bacteria                                                | Firmicutes | Bacilli | Lactobacillales | Streptococcaceae | Streptococcus | unclassified | Streptococcus | unclassified | Streptococcus | unclassified |         |
| 45161 | 7624            | 6239   | 5939    | 6710    | 12375     | 13211 | 13102 | 12849 | Bacteria                                                | Firmicutes | Bacilli | Lactobacillales | Streptococcaceae | Streptococcus | unclassified | Streptococcus | unclassified | Streptococcus | unclassified |         |
| 45167 | 8257            | 7127   | 6683    | 7078    | 11395     | 12318 | 12254 | 11975 | Bacteria                                                | Firmicutes | Bacilli | Lactobacillales | Streptococcaceae | Streptococcus | unclassified | Streptococcus | unclassified | Streptococcus | unclassified |         |
| 45179 | 7928            | 6208   | 6369    | 6469    | 11165     | 12054 | 12247 | 11722 | Bacteria                                                | Firmicutes | Bacilli |                 |                  |               |              |               |              |               |              |         |

Table S6 (part N): HybScores of OTUs that were called present in at least one of the samples. Taxonomic classifications are based on PhyloChip taxonomy (derived from GreenGenes). Please note, that data presented here was rank normalized before performing statistical analyses presented in the manuscript.

| OTU   | Sample ID (PMA) |        |         |         | Sample ID |       |       |         | taxonomic classification of representative rOTU cluster |            |            |                 |
|-------|-----------------|--------|---------|---------|-----------|-------|-------|---------|---------------------------------------------------------|------------|------------|-----------------|
|       | UR_PMA          | CO_PMA | CRS_PMA | CRS_PMA | UR        | CO    | CRS   | Kingdom | phylum                                                  | class      | order      | family          |
| 45536 | 7847            | 6910   | 6690    | 6901    | 11543     | 12074 | 11915 | 11840   | Bacteria                                                | Firmicutes | Bacilli    | Lactobacillales |
| 45549 | 8629            | 8109   | 7560    | 7021    | 11516     | 12360 | 12299 | 12006   | Bacteria                                                | Firmicutes | Bacilli    | Lactobacillales |
| 45556 | 8156            | 7366   | 7229    | 7156    | 11354     | 12138 | 11967 | 11870   | Bacteria                                                | Firmicutes | Bacilli    | Lactobacillales |
| 45563 | 7775            | 7007   | 6342    | 6934    | 11647     | 12413 | 12296 | 12258   | Bacteria                                                | Firmicutes | Bacilli    | Lactobacillales |
| 45578 | 8939            | 8856   | 7971    | 7786    | 11748     | 12347 | 12306 | 12081   | Bacteria                                                | Firmicutes | Bacilli    | Lactobacillales |
| 45587 | 8374            | 7751   | 7434    | 7373    | 12054     | 12739 | 12619 | 12528   | Bacteria                                                | Firmicutes | Bacilli    | Lactobacillales |
| 45601 | 8622            | 8586   | 8101    | 7160    | 11394     | 12112 | 11963 | 11870   | Bacteria                                                | Firmicutes | Bacilli    | Lactobacillales |
| 45626 | 8060            | 7283   | 6748    | 7149    | 11758     | 12348 | 12238 | 12067   | Bacteria                                                | Firmicutes | Bacilli    | Lactobacillales |
| 45628 | 8079            | 7431   | 7018    | 7182    | 11428     | 12270 | 12133 | 12060   | Bacteria                                                | Firmicutes | Bacilli    | Lactobacillales |
| 45679 | 8111            | 7223   | 6832    | 6842    | 11605     | 12330 | 12147 | 12008   | Bacteria                                                | Firmicutes | Bacilli    | Lactobacillales |
| 45682 | 8124            | 7451   | 6452    | 7005    | 11912     | 12592 | 12399 | 12376   | Bacteria                                                | Firmicutes | Bacilli    | Lactobacillales |
| 45694 | 8226            | 7891   | 6848    | 7484    | 11831     | 12331 | 12188 | 12153   | Bacteria                                                | Firmicutes | Bacilli    | Lactobacillales |
| 45695 | 8145            | 7189   | 6991    | 6866    | 11509     | 12271 | 12086 | 11951   | Bacteria                                                | Firmicutes | Bacilli    | Lactobacillales |
| 45720 | 8110            | 7263   | 6989    | 7005    | 11888     | 12515 | 12401 | 12210   | Bacteria                                                | Firmicutes | Bacilli    | Lactobacillales |
| 45725 | 8164            | 7365   | 7240    | 6960    | 11469     | 12137 | 12147 | 12020   | Bacteria                                                | Firmicutes | Bacilli    | Lactobacillales |
| 45744 | 8101            | 7172   | 7049    | 7033    | 11845     | 12485 | 12243 | 12149   | Bacteria                                                | Firmicutes | Bacilli    | Lactobacillales |
| 45828 | 8152            | 7071   | 6762    | 6781    | 11100     | 12101 | 12076 | 11738   | Bacteria                                                | Firmicutes | Bacilli    | Lactobacillales |
| 45837 | 8613            | 8268   | 7228    | 7182    | 11084     | 12155 | 12048 | 11714   | Bacteria                                                | Firmicutes | Bacilli    | Lactobacillales |
| 45844 | 7937            | 6963   | 5888    | 6706    | 11814     | 12500 | 12295 | 12235   | Bacteria                                                | Firmicutes | Bacilli    | Lactobacillales |
| 45855 | 8439            | 8179   | 6858    | 7025    | 11481     | 12408 | 12436 | 12077   | Bacteria                                                | Firmicutes | Bacilli    | Lactobacillales |
| 45879 | 7701            | 6521   | 5870    | 6641    | 11486     | 12151 | 11745 | 11852   | Bacteria                                                | Firmicutes | Bacilli    | Lactobacillales |
| 45878 | 7774            | 6749   | 6497    | 6708    | 12008     | 12671 | 12517 | 12446   | Bacteria                                                | Firmicutes | Bacilli    | Lactobacillales |
| 45879 | 8817            | 8842   | 7484    | 7534    | 11963     | 12304 | 11955 | 11974   | Bacteria                                                | Firmicutes | Bacilli    | Lactobacillales |
| 45896 | 8495            | 9163   | 7321    | 6638    | 12025     | 12335 | 12596 | 12244   | Bacteria                                                | Firmicutes | Bacilli    | Lactobacillales |
| 49397 | 9551            | 10215  | 8774    | 7633    | 11958     | 12511 | 12240 | 12999   | Bacteria                                                | Firmicutes | Bacilli    | Thermicaneales  |
| 72587 | 10532           | 11225  | 10700   | 9786    | 11885     | 12305 | 12311 | 11660   | Bacteria                                                | Firmicutes | Clostridia | Clostridiales   |
| 72590 | 8763            | 9496   | 8070    | 7390    | 12154     | 12837 | 12561 | 12498   | Bacteria                                                | Firmicutes | Clostridia | Clostridiales   |
| 44215 | 10278           | 10725  | 9495    | 7020    | 11926     | 12152 | 11405 | 11834   | Bacteria                                                | Firmicutes | Clostridia | Clostridiales   |
| 44702 | 9610            | 10525  | 6881    | 7022    | 11542     | 11721 | 10693 | 11657   | Bacteria                                                | Firmicutes | Clostridia | Clostridiales   |
| 44744 | 10121           | 10568  | 9358    | 8626    | 11569     | 11926 | 10811 | 11634   | Bacteria                                                | Firmicutes | Clostridia | Clostridiales   |
| 45487 | 11653           | 11794  | 11889   | 11732   | 12578     | 12464 | 12227 | 12676   | Bacteria                                                | Firmicutes | Clostridia | Clostridiales   |
| 45735 | 10329           | 10974  | 9411    | 8247    | 11837     | 12240 | 11064 | 11900   | Bacteria                                                | Firmicutes | Clostridia | Clostridiales   |
| 45861 | 8547            | 9300   | 6362    | 6814    | 11800     | 12172 | 11043 | 11657   | Bacteria                                                | Firmicutes | Clostridia | Clostridiales   |
| 72582 | 9497            | 9208   | 7040    | 7717    | 12221     | 12828 | 12221 | 12618   | Bacteria                                                | Firmicutes | Clostridia | Clostridiales   |
| 72719 | 9211            | 9705   | 8802    | 8298    | 11863     | 12271 | 11713 | 11931   | Bacteria                                                | Firmicutes | Clostridia | Clostridiales   |
| 71089 | 7858            | 6744   | 6596    | 6901    | 11164     | 11303 | 11855 | 11620   | Bacteria                                                | Firmicutes | Clostridia | Clostridiales   |
| 71224 | 9835            | 10063  | 9555    | 9130    | 11573     | 12355 | 11898 | 12424   | Bacteria                                                | Firmicutes | Clostridia | Clostridiales   |
| 70669 | 10952           | 11247  | 10307   | 10266   | 11918     | 12620 | 12386 | 12634   | Bacteria                                                | Firmicutes | Clostridia | Clostridiales   |
| 70706 | 9153            | 9177   | 8659    | 7756    | 12053     | 12326 | 12182 | 12582   | Bacteria                                                | Firmicutes | Clostridia | Clostridiales   |
| 70712 | 8468            | 9475   | 8222    | 7593    | 11885     | 12163 | 12520 | 13083   | Bacteria                                                | Firmicutes | Clostridia | Clostridiales   |
| 70850 | 9770            | 11313  | 11102   | 10100   | 12474     | 12807 | 12876 | 13243   | Bacteria                                                | Firmicutes | Clostridia | Clostridiales   |
| 70919 | 8961            | 9204   | 9881    | 8021    | 12917     | 12352 | 11781 | 11916   | Bacteria                                                | Firmicutes | Clostridia | Clostridiales   |
| 71020 | 9774            | 9500   | 8422    | 7612    | 12840     | 13045 | 12863 | 13282   | Bacteria                                                | Firmicutes | Clostridia | Clostridiales   |
| 71075 | 9907            | 10162  | 9401    | 9252    | 12916     | 12884 | 12969 | 13319   | Bacteria                                                | Firmicutes | Clostridia | Clostridiales   |
| 71091 | 9527            | 8481   | 6686    | 8804    | 12361     | 12306 | 12535 | 12998   | Bacteria                                                | Firmicutes | Clostridia | Clostridiales   |
| 71113 | 9162            | 8870   | 8465    | 8160    | 11420     | 11669 | 11714 | 12183   | Bacteria                                                | Firmicutes | Clostridia | Clostridiales   |
| 71191 | 9211            | 9656   | 8919    | 7825    | 12616     | 12373 | 12668 | 13004   | Bacteria                                                | Firmicutes | Clostridia | Clostridiales   |
| 71202 | 10046           | 10237  | 7957    | 9001    | 12083     | 12405 | 12325 | 12981   | Bacteria                                                | Firmicutes | Clostridia | Clostridiales   |
| 71236 | 11828           | 11216  | 11154   | 11216   | 12020     | 13064 | 13106 | 13671   | Bacteria                                                | Firmicutes | Clostridia | Clostridiales   |
| 70051 | 9122            | 7812   | 6241    | 6814    | 11778     | 11899 | 12750 | 13293   | Bacteria                                                | Firmicutes | Clostridia | Clostridiales   |
| 69992 | 9133            | 7817   | 6984    | 7290    | 11648     | 11924 | 12487 | 13047   | Bacteria                                                | Firmicutes | Clostridia | Clostridiales   |
| 70627 | 8846            | 7934   | 8283    | 7169    | 12074     | 12357 | 12484 | 12557   | Bacteria                                                | Firmicutes | Clostridia | Clostridiales   |
| 70180 | 9022            | 8553   | 8619    | 7035    | 11786     | 12293 | 12140 | 12690   | Bacteria                                                | Firmicutes | Clostridia | Clostridiales   |
| 70289 | 9090            | 7911   | 6501    | 8604    | 12035     | 12934 | 12296 | 12952   | Bacteria                                                | Firmicutes | Clostridia | Clostridiales   |
| 70286 | 8679            | 9090   | 6371    | 7156    | 11005     | 11902 | 11223 | 11760   | Bacteria                                                | Firmicutes | Clostridia | Clostridiales   |
| 69417 | 8294            | 8719   | 8815    | 8245    | 10955     | 12462 | 11056 | 12020   | Bacteria                                                | Firmicutes | Clostridia | Clostridiales   |
| 69681 | 8609            | 8185   | 7649    | 7147    | 10759     | 11884 | 11197 | 11821   | Bacteria                                                | Firmicutes | Clostridia | Clostridiales   |
| 70082 | 10097           | 10615  | 9593    | 9279    | 12987     | 13367 | 13145 | 13626   | Bacteria                                                | Firmicutes | Clostridia | Clostridiales   |
| 70118 | 10980           | 11763  | 11432   | 9914    | 11733     | 12482 | 11952 | 12031   | Bacteria                                                | Firmicutes | Clostridia | Clostridiales   |
| 69633 | 8344            | 8608   | 7117    | 7174    | 10675     | 11732 | 10999 | 11727   | Bacteria                                                | Firmicutes | Clostridia | Clostridiales   |
| 20652 | 10007           | 8939   | 8075    | 7786    | 11900     | 12515 | 12065 | 12783   | Bacteria                                                | Firmicutes | Clostridia | Clostridiales   |
| 21135 | 9285            | 9136   | 8479    | 8926    | 11160     | 11997 | 11607 | 11988   | Bacteria                                                | Firmicutes | Clostridia | Clostridiales   |
| 23140 | 7716            | 7947   | 7219    | 7179    | 10765     | 11862 | 11094 | 11659   | Bacteria                                                | Firmicutes | Clostridia | Clostridiales   |
| 23182 | 10024           | 10035  | 8060    | 7932    | 11611     | 12434 | 11722 | 12108   | Bacteria                                                | Firmicutes | Clostridia | Clostridiales   |
| 20192 | 9866            | 10136  | 9320    | 8788    | 11268     | 12194 | 11393 | 12118   | Bacteria                                                | Firmicutes | Clostridia | Clostridiales   |
| 22993 | 8675            | 8995   | 7167    | 7111    | 11766     | 12525 | 12214 | 12733   | Bacteria                                                | Firmicutes | Clostridia | Clostridiales   |
| 24363 | 9637            | 10287  | 7767    | 8204    | 12142     | 13675 | 12731 | 13099   | Bacteria                                                | Firmicutes | Clostridia | Clostridiales   |
| 19752 | 8284            | 7478   | 6372    | 6644    | 10762     | 11891 | 11490 | 11529   | Bacteria                                                | Firmicutes | Clostridia | Clostridiales   |
| 19427 | 7672            | 6754   | 6701    | 7223    | 10657     | 10582 | 10704 | 11613   | Bacteria                                                | Firmicutes | Clostridia | Clostridiales   |
| 17447 | 8286            | 7356   | 7201    | 8010    | 11203     | 10749 | 11056 | 11261   | Bacteria                                                | Firmicutes | Clostridia | Clostridiales   |
| 17519 | 8166            | 7828   | 6849    | 7067    | 11737     | 11693 | 11988 | 12656   | Bacteria                                                | Firmicutes | Clostridia | Clostridiales   |
| 17661 | 7812            | 7644   | 6677    | 6943    | 11012     | 10822 | 10647 | 11096   | Bacteria                                                | Firmicutes | Clostridia | Clostridiales   |
| 17677 | 8350            | 7506   | 6757    | 7356    | 11444     | 10823 | 11327 | 12227   | Bacteria                                                | Firmicutes | Clostridia | Clostridiales   |
| 17726 | 8497            | 8959   | 7189    | 7380    | 11138     | 10822 | 11055 | 12282   | Bacteria                                                | Firmicutes | Clostridia | Clostridiales   |
| 17744 | 8376            | 7307   | 7805    | 7460    | 10712     | 9994  | 10417 | 12028   | Bacteria                                                | Firmicutes | Clostridia | Clostridiales   |
| 17765 | 9572            | 10249  | 7789    | 8390    | 12440     | 12918 | 13155 | 13799   | Bacteria                                                | Firmicutes | Clostridia | Clostridiales   |
| 17792 | 7899            | 8914   | 8048    | 8680    | 10948     | 10976 | 10486 | 11056   | Bacteria                                                | Firmicutes | Clostridia | Clostridiales   |
| 17828 | 8256            | 7465   | 6520    | 6913    | 11275     | 11050 | 11265 | 12020   | Bacteria                                                | Firmicutes | Clostridia | Clostridiales   |
| 17893 | 8346            | 6742   | 6785    | 7751    | 11982     | 11343 | 11792 | 12279   | Bacteria                                                | Firmicutes | Clostridia | Clostridiales   |
| 17943 | 8565            | 8732   | 8396    | 8641    | 10539     | 10881 | 10080 | 11766   | Bacteria                                                | Firmicutes | Clostridia | Clostridiales   |
| 17964 | 7912            | 7154   | 6953    | 7723    | 10983     | 10406 | 10786 | 12249   | Bacteria                                                | Firmicutes | Clostridia | Clostridiales   |
| 18113 | 8429            | 7551   | 6849    | 7259    | 10947     | 10700 | 11009 | 11847   | Bacteria                                                | Firmicutes | Clostridia | Clostridiales   |
| 18137 | 8293            | 7291   | 6753    | 7219    | 11648     | 11158 | 11704 | 12759   | Bacteria                                                | Firmicutes | Clostridia | Clostridiales   |
| 18175 | 1220            | 6854   | 7720    | 7075    | 11107     | 11007 | 11363 | 11957   | Bacteria                                                | Firmicutes | Clostridia | Clostridiales   |
| 18222 | 7658            | 7575   | 6501    | 6677    | 11288     | 11802 | 11345 | 12241   | Bacteria                                                | Firmicutes | Clostridia | Clostridiales   |
| 18252 | 8646            | 8058   | 7107    | 6955    | 11380     | 11146 | 11376 | 12119   | Bacteria                                                | Firmicutes | Clostridia | Clostridiales   |
| 18254 | 8456            | 7659   | 6974    | 7463    | 11390     | 11017 | 11392 | 12380   | Bacteria                                                | Firmicutes | Clostridia | Clostridiales   |
| 18281 | 9243            | 9347   | 7424    | 8430    | 10567     | 10575 | 10386 | 11633   | Bacteria                                                | Firmicutes | Clostridia | Clostridiales   |
| 18765 | 8628            | 6888   | 6807    | 6834    | 11063     | 11701 | 11557 | 12307   | Bacteria                                                | Firmicutes | Clostridia | Clostridiales   |
| 17851 | 9721            | 9596   | 8621    | 8821    | 11852     | 12189 | 11860 | 12081   | Bacteria                                                | Firmicutes | Clostridia | Clostridiales   |
| 19470 | 11182           | 11997  | 11485   | 10320   | 12235     | 12459 | 12785 | 12785   | Bacteria                                                | Firmicutes | Clostridia | Clostridiales   |
| 20782 | 9272            | 9142   | 8314    | 7192    | 11789     | 12315 | 12016 | 12296   | Bacteria                                                | Firmicutes | Clostridia | Clostridiales   |
| 23349 | 8857            | 7970   | 6401    | 7144    | 11855     | 12089 | 11375 | 11811   | Bacteria                                                | Firmicutes | Clostridia | Clostridiales   |
| 23407 | 8328            | 8246   | 7171    | 7618    | 10956     | 12552 | 11676 | 12087   | Bacteria                                                | Firmicutes | Clostridia | Clostridiales   |
| 23119 | 9281            | 9692   | 9462    | 8630    | 11281     | 12096 | 11132 | 11450   | Bacteria                                                | Firmicutes | Clostridia | Clostridiales   |
| 69913 | 10092           | 10720  | 8500    | 8181    | 12175     | 12649 | 12299 | 12674   | Bacteria                                                | Firmicutes | Clostridia | Clostridiales   |
| 70043 | 9032            | 8339   | 7465    | 7469    | 11596     | 12243 | 12228 | 12591   | Bacteria                                                | Firmicutes | Clostridia | Clostridiales   |
| 70179 | 8628            | 9118   | 7032    | 10141   | 12638     | 13023 | 12582 | 13197   | Bacteria                                                | Firmicutes | Clostridia | Clostridiales   |
|       |                 |        |         |         |           |       |       |         |                                                         |            |            |                 |

Table S6 (part 0): HybScores of OTUs that were called present in at least one of the samples. Taxonomic classifications are based on PhyloChip taxonomy (derived from GreenGenes). Please note, that data presented here was rank normalized before performing statistical analyses presented in the manuscript.

| OTU   | Sample ID (PMA) |        |         | Sample ID |       |       | OTU   | CRS   | Kingdom  | phylum     | class      | taxonomic classification of representative rOTU cluster |                 |                  |                              | genus | species |
|-------|-----------------|--------|---------|-----------|-------|-------|-------|-------|----------|------------|------------|---------------------------------------------------------|-----------------|------------------|------------------------------|-------|---------|
|       | UR_PMA          | CO_PMA | CRS_PMA | UR        | CO    | CRS   |       |       |          |            |            | Family                                                  | Order           | Family           | Order                        |       |         |
| 70579 | 9145            | 9873   | 6958    | 6785      | 11833 | 12711 | 11678 | 12610 | Bacteria | Firmicutes | Clostridia | Clostridiales                                           | Lachnospiraceae | unclassified     | unclassified                 |       |         |
| 70606 | 11199           | 11538  | 10735   | 10434     | 11826 | 12701 | 11967 | 12865 | Bacteria | Firmicutes | Clostridia | Clostridiales                                           | Lachnospiraceae | unclassified     | unclassified                 |       |         |
| 70639 | 10477           | 11255  | 10555   | 10136     | 12365 | 12613 | 12033 | 12050 | Bacteria | Firmicutes | Clostridia | Clostridiales                                           | Lachnospiraceae | unclassified     | unclassified                 |       |         |
| 70729 | 9548            | 10493  | 9205    | 8920      | 11722 | 12321 | 11956 | 11944 | Bacteria | Firmicutes | Clostridia | Clostridiales                                           | Lachnospiraceae | unclassified     | unclassified                 |       |         |
| 70775 | 8747            | 8046   | 7874    | 7708      | 11504 | 12138 | 11768 | 11965 | Bacteria | Firmicutes | Clostridia | Clostridiales                                           | Lachnospiraceae | unclassified     | unclassified                 |       |         |
| 70838 | 1780            | 8576   | 7074    | 6961      | 11158 | 12012 | 11175 | 11807 | Bacteria | Firmicutes | Clostridia | Clostridiales                                           | Lachnospiraceae | unclassified     | unclassified                 |       |         |
| 70892 | 9388            | 7485   | 6735    | 8735      | 11289 | 12258 | 11450 | 11704 | Bacteria | Firmicutes | Clostridia | Clostridiales                                           | Lachnospiraceae | unclassified     | unclassified                 |       |         |
| 70902 | 9594            | 9782   | 9449    | 9056      | 11073 | 11777 | 11184 | 11410 | Bacteria | Firmicutes | Clostridia | Clostridiales                                           | Lachnospiraceae | unclassified     | unclassified                 |       |         |
| 70911 | 9939            | 11747  | 8284    | 9044      | 13063 | 13374 | 12774 | 13164 | Bacteria | Firmicutes | Clostridia | Clostridiales                                           | Lachnospiraceae | unclassified     | unclassified                 |       |         |
| 70956 | 8508            | 7242   | 7293    | 7870      | 10981 | 12007 | 11262 | 11785 | Bacteria | Firmicutes | Clostridia | Clostridiales                                           | Lachnospiraceae | unclassified     | unclassified                 |       |         |
| 70970 | 11214           | 12142  | 11261   | 8902      | 12724 | 12710 | 12314 | 12401 | Bacteria | Firmicutes | Clostridia | Clostridiales                                           | Lachnospiraceae | unclassified     | unclassified                 |       |         |
| 71056 | 9455            | 10230  | 9270    | 8742      | 12072 | 12638 | 12457 | 12726 | Bacteria | Firmicutes | Clostridia | Clostridiales                                           | Lachnospiraceae | unclassified     | unclassified                 |       |         |
| 71105 | 9526            | 7270   | 6905    | 7891      | 10663 | 12164 | 10885 | 11639 | Bacteria | Firmicutes | Clostridia | Clostridiales                                           | Lachnospiraceae | unclassified     | unclassified                 |       |         |
| 71159 | 8590            | 7060   | 7279    | 8080      | 10796 | 11871 | 11016 | 11435 | Bacteria | Firmicutes | Clostridia | Clostridiales                                           | Lachnospiraceae | unclassified     | unclassified                 |       |         |
| 71178 | 8539            | 7141   | 6538    | 7608      | 10864 | 11819 | 11007 | 11372 | Bacteria | Firmicutes | Clostridia | Clostridiales                                           | Lachnospiraceae | unclassified     | unclassified                 |       |         |
| 71190 | 10589           | 10611  | 10097   | 9459      | 12831 | 13010 | 12718 | 13015 | Bacteria | Firmicutes | Clostridia | Clostridiales                                           | Lachnospiraceae | unclassified     | unclassified                 |       |         |
| 71261 | 10020           | 10952  | 10257   | 9108      | 12144 | 12419 | 12054 | 12585 | Bacteria | Firmicutes | Clostridia | Clostridiales                                           | Lachnospiraceae | unclassified     | unclassified                 |       |         |
| 71274 | 9492            | 9668   | 9291    | 7969      | 11300 | 13307 | 12198 | 12528 | Bacteria | Firmicutes | Clostridia | Clostridiales                                           | Lachnospiraceae | unclassified     | unclassified                 |       |         |
| 48912 | 8620            | 8038   | 7629    | 7268      | 11300 | 12388 | 11560 | 11896 | Bacteria | Firmicutes | Clostridia | Clostridiales                                           | Peptococcaceae  | Desulfotomaculum | unclassified                 |       |         |
| 49213 | 8297            | 8841   | 8429    | 7544      | 10037 | 11725 | 10657 | 11342 | Bacteria | Firmicutes | Clostridia | Clostridiales                                           | Peptococcaceae  | Desulfotomaculum | unclassified                 |       |         |
| 48830 | 10208           | 11420  | 10703   | 10811     | 12335 | 13175 | 13253 | 13302 | Bacteria | Firmicutes | Clostridia | Clostridiales                                           | Peptococcaceae  | unclassified     | unclassified                 |       |         |
| 24602 | 8977            | 9805   | 8715    | 7890      | 11545 | 12434 | 12142 | 12251 | Bacteria | Firmicutes | Clostridia | Clostridiales                                           | Ruminococcaceae | Faecalibacterium | Faecalibacterium prausnitzii |       |         |
| 24700 | 8589            | 8267   | 6993    | 7278      | 11597 | 11938 | 11632 | 12035 | Bacteria | Firmicutes | Clostridia | Clostridiales                                           | Ruminococcaceae | Faecalibacterium | Faecalibacterium prausnitzii |       |         |
| 24841 | 7987            | 7582   | 6916    | 6971      | 10841 | 12027 | 11456 | 11784 | Bacteria | Firmicutes | Clostridia | Clostridiales                                           | Ruminococcaceae | Faecalibacterium | Faecalibacterium prausnitzii |       |         |
| 25077 | 8138            | 7697   | 7067    | 6848      | 10831 | 11883 | 11126 | 11714 | Bacteria | Firmicutes | Clostridia | Clostridiales                                           | Ruminococcaceae | Faecalibacterium | Faecalibacterium prausnitzii |       |         |
| 25078 | 7719            | 7213   | 6017    | 5669      | 11057 | 12295 | 11710 | 11918 | Bacteria | Firmicutes | Clostridia | Clostridiales                                           | Ruminococcaceae | Faecalibacterium | Faecalibacterium prausnitzii |       |         |
| 25139 | 8693            | 8940   | 7564    | 6641      | 11930 | 12055 | 11880 | 12653 | Bacteria | Firmicutes | Clostridia | Clostridiales                                           | Ruminococcaceae | Faecalibacterium | Faecalibacterium prausnitzii |       |         |
| 25273 | 8170            | 7465   | 6963    | 7333      | 10632 | 11677 | 11039 | 10950 | Bacteria | Firmicutes | Clostridia | Clostridiales                                           | Ruminococcaceae | Faecalibacterium | Faecalibacterium prausnitzii |       |         |
| 25288 | 8660            | 9036   | 7738    | 7333      | 11732 | 12453 | 11805 | 12359 | Bacteria | Firmicutes | Clostridia | Clostridiales                                           | Ruminococcaceae | Faecalibacterium | Faecalibacterium prausnitzii |       |         |
| 25319 | 8243            | 7402   | 6653    | 7011      | 10522 | 11767 | 11246 | 11122 | Bacteria | Firmicutes | Clostridia | Clostridiales                                           | Ruminococcaceae | Faecalibacterium | Faecalibacterium prausnitzii |       |         |
| 25325 | 8455            | 7312   | 6496    | 5742      | 11137 | 11759 | 11524 | 11955 | Bacteria | Firmicutes | Clostridia | Clostridiales                                           | Ruminococcaceae | Faecalibacterium | Faecalibacterium prausnitzii |       |         |
| 25425 | 10706           | 11428  | 11031   | 9624      | 11993 | 12559 | 12205 | 12483 | Bacteria | Firmicutes | Clostridia | Clostridiales                                           | Ruminococcaceae | Faecalibacterium | Faecalibacterium prausnitzii |       |         |
| 25449 | 8306            | 7438   | 6480    | 6881      | 10383 | 11785 | 11215 | 11524 | Bacteria | Firmicutes | Clostridia | Clostridiales                                           | Ruminococcaceae | Faecalibacterium | Faecalibacterium prausnitzii |       |         |
| 25759 | 8635            | 6934   | 6139    | 6684      | 10200 | 11729 | 10846 | 10599 | Bacteria | Firmicutes | Clostridia | Clostridiales                                           | Ruminococcaceae | Faecalibacterium | Faecalibacterium prausnitzii |       |         |
| 25804 | 8300            | 7672   | 7050    | 6977      | 11047 | 11964 | 11449 | 10963 | Bacteria | Firmicutes | Clostridia | Clostridiales                                           | Ruminococcaceae | Faecalibacterium | Faecalibacterium prausnitzii |       |         |
| 25901 | 10958           | 10892  | 10702   | 10685     | 13193 | 13219 | 12988 | 13295 | Bacteria | Firmicutes | Clostridia | Clostridiales                                           | Ruminococcaceae | Faecalibacterium | Faecalibacterium prausnitzii |       |         |
| 25914 | 8496            | 8832   | 7625    | 7252      | 11219 | 11971 | 11363 | 12021 | Bacteria | Firmicutes | Clostridia | Clostridiales                                           | Ruminococcaceae | Faecalibacterium | Faecalibacterium prausnitzii |       |         |
| 25950 | 8272            | 7544   | 6757    | 7025      | 11218 | 12251 | 11704 | 11295 | Bacteria | Firmicutes | Clostridia | Clostridiales                                           | Ruminococcaceae | Faecalibacterium | Faecalibacterium prausnitzii |       |         |
| 26109 | 7950            | 7359   | 6689    | 6960      | 10725 | 12075 | 11381 | 11678 | Bacteria | Firmicutes | Clostridia | Clostridiales                                           | Ruminococcaceae | Faecalibacterium | Faecalibacterium prausnitzii |       |         |
| 26219 | 8053            | 7091   | 6489    | 6929      | 10979 | 12034 | 11548 | 11459 | Bacteria | Firmicutes | Clostridia | Clostridiales                                           | Ruminococcaceae | Faecalibacterium | Faecalibacterium prausnitzii |       |         |
| 26288 | 9713            | 9029   | 7668    | 6252      | 12345 | 13020 | 12988 | 13722 | Bacteria | Firmicutes | Clostridia | Clostridiales                                           | Ruminococcaceae | Faecalibacterium | Faecalibacterium prausnitzii |       |         |
| 26371 | 9675            | 10019  | 9087    | 9022      | 11689 | 12602 | 11913 | 12470 | Bacteria | Firmicutes | Clostridia | Clostridiales                                           | Ruminococcaceae | Faecalibacterium | Faecalibacterium prausnitzii |       |         |
| 26393 | 8347            | 7692   | 6814    | 6519      | 11142 | 11781 | 11615 | 11824 | Bacteria | Firmicutes | Clostridia | Clostridiales                                           | Ruminococcaceae | Faecalibacterium | Faecalibacterium prausnitzii |       |         |
| 26430 | 7844            | 6527   | 6092    | 6514      | 10320 | 11954 | 11133 | 10752 | Bacteria | Firmicutes | Clostridia | Clostridiales                                           | Ruminococcaceae | Faecalibacterium | Faecalibacterium prausnitzii |       |         |
| 26462 | 10672           | 10572  | 10054   | 10113     | 12114 | 12772 | 12681 | 13193 | Bacteria | Firmicutes | Clostridia | Clostridiales                                           | Ruminococcaceae | Faecalibacterium | Faecalibacterium prausnitzii |       |         |
| 26514 | 8304            | 7561   | 6944    | 7092      | 11184 | 12269 | 11555 | 11172 | Bacteria | Firmicutes | Clostridia | Clostridiales                                           | Ruminococcaceae | Faecalibacterium | Faecalibacterium prausnitzii |       |         |
| 26613 | 9946            | 9265   | 8265    | 6788      | 10542 | 11866 | 10841 | 11138 | Bacteria | Firmicutes | Clostridia | Clostridiales                                           | Ruminococcaceae | Faecalibacterium | Faecalibacterium prausnitzii |       |         |
| 24427 | 10613           | 11381  | 10744   | 8701      | 12345 | 12718 | 12242 | 12205 | Bacteria | Firmicutes | Clostridia | Clostridiales                                           | Ruminococcaceae | Faecalibacterium | unclassified                 |       |         |
| 24447 | 9422            | 9485   | 6712    | 6968      | 12856 | 13098 | 12982 | 13647 | Bacteria | Firmicutes | Clostridia | Clostridiales                                           | Ruminococcaceae | Faecalibacterium | unclassified                 |       |         |
| 24455 | 8004            | 7496   | 6708    | 7015      | 10323 | 11751 | 10992 | 11348 | Bacteria | Firmicutes | Clostridia | Clostridiales                                           | Ruminococcaceae | Faecalibacterium | unclassified                 |       |         |
| 24509 | 9127            | 8993   | 6986    | 6922      | 12475 | 12634 | 12508 | 13296 | Bacteria | Firmicutes | Clostridia | Clostridiales                                           | Ruminococcaceae | Faecalibacterium | unclassified                 |       |         |
| 24544 | 11014           | 11009  | 10613   | 9451      | 12425 | 12887 | 12347 | 12851 | Bacteria | Firmicutes | Clostridia | Clostridiales                                           | Ruminococcaceae | Faecalibacterium | unclassified                 |       |         |
| 24600 | 8446            | 7700   | 7075    | 7759      | 10251 | 11860 | 10942 | 10998 | Bacteria | Firmicutes | Clostridia | Clostridiales                                           | Ruminococcaceae | Faecalibacterium | unclassified                 |       |         |
| 24608 | 7873            | 6797   | 6519    | 7307      | 10308 | 11753 | 10946 | 10640 | Bacteria | Firmicutes | Clostridia | Clostridiales                                           | Ruminococcaceae | Faecalibacterium | unclassified                 |       |         |
| 24646 | 7802            | 7149   | 6628    | 7295      | 10258 | 11747 | 10902 | 10963 | Bacteria | Firmicutes | Clostridia | Clostridiales                                           | Ruminococcaceae | Faecalibacterium | unclassified                 |       |         |
| 24857 | 8498            | 8809   | 7616    | 7221      | 11335 | 12123 | 11502 | 12148 | Bacteria | Firmicutes | Clostridia | Clostridiales                                           | Ruminococcaceae | Faecalibacterium | unclassified                 |       |         |
| 24978 | 9202            | 8535   | 8016    | 7301      | 11555 | 12300 | 12319 | 12593 | Bacteria | Firmicutes | Clostridia | Clostridiales                                           | Ruminococcaceae | Faecalibacterium | unclassified                 |       |         |
| 24986 | 12402           | 12720  | 12683   | 12369     | 11654 | 12560 | 12312 | 12148 | Bacteria | Firmicutes | Clostridia | Clostridiales                                           | Ruminococcaceae | Faecalibacterium | unclassified                 |       |         |
| 24996 | 8555            | 7912   | 7312    | 7658      | 11116 | 12177 | 11749 | 11845 | Bacteria | Firmicutes | Clostridia | Clostridiales                                           | Ruminococcaceae | Faecalibacterium | unclassified                 |       |         |
| 25126 | 7643            | 7283   | 6729    | 7251      | 10489 | 11802 | 11136 | 11276 | Bacteria | Firmicutes | Clostridia | Clostridiales                                           | Ruminococcaceae | Faecalibacterium | unclassified                 |       |         |
| 25221 | 9635            | 7014   | 7043    | 6888      | 12083 | 12504 | 12482 | 12773 | Bacteria | Firmicutes | Clostridia | Clostridiales                                           | Ruminococcaceae | Faecalibacterium | unclassified                 |       |         |
| 25291 | 7991            | 7072   | 6782    | 7090      | 10489 | 11832 | 11158 | 11482 | Bacteria | Firmicutes | Clostridia | Clostridiales                                           | Ruminococcaceae | Faecalibacterium | unclassified                 |       |         |
| 25341 | 10252           | 10804  | 9265    | 9038      | 12753 | 13178 | 12852 | 13128 | Bacteria | Firmicutes | Clostridia | Clostridiales                                           | Ruminococcaceae | Faecalibacterium | unclassified                 |       |         |
| 25380 | 9453            | 9405   | 6731    | 7010      | 12772 | 12952 | 12832 | 13556 | Bacteria | Firmicutes | Clostridia | Clostridiales                                           | Ruminococcaceae | Faecalibacterium | unclassified                 |       |         |
| 25471 | 9433            | 9690   | 6739    | 7027      | 13159 | 13133 | 13017 | 13706 | Bacteria | Firmicutes | Clostridia | Clostridiales                                           | Ruminococcaceae | Faecalibacterium | unclassified                 |       |         |
| 25499 | 8315            | 7608   | 7404    | 7782      | 10938 | 12043 | 11553 | 10672 | Bacteria | Firmicutes | Clostridia | Clostridiales                                           | Ruminococcaceae | Faecalibacterium | unclassified                 |       |         |
| 25558 | 7718            | 7120   | 6268    | 7498      | 10677 | 12000 | 11114 | 11302 | Bacteria | Firmicutes | Clostridia | Clostridiales                                           | Ruminococcaceae | Faecalibacterium | unclassified                 |       |         |
| 25603 | 10114           | 10323  | 9173    | 7620      | 10951 | 11867 | 11215 | 11554 | Bacteria | Firmicutes | Clostridia |                                                         |                 |                  |                              |       |         |

Table S6 (part P): Hy5cores of OTUs that were called present in at least one of the samples. Taxonomic classifications are based on PhyloChip taxonomy (derived from GreenGenes). Please note, that data presented here was rank normalized before performing statistical analyses presented in the manuscript.

| OTU   | Sample ID (PMA) |        |         | Sample ID |         |          | Kingdom | taxonomic classification of representative rOTU cluster |                  |                     |                  |                   |                |                           | genus | species |
|-------|-----------------|--------|---------|-----------|---------|----------|---------|---------------------------------------------------------|------------------|---------------------|------------------|-------------------|----------------|---------------------------|-------|---------|
|       | UR_PMA          | CO_PMA | CRS_PMA | UR_CRIS   | CO_CRIS | CRS_CRIS |         | phylum                                                  | class            | order               | family           |                   |                |                           |       |         |
| 50707 | 9140            | 9239   | 8398    | 7998      | 11354   | 12704    | 12117   | Bacteria                                                | Firmicutes       | Clostridia          | Clostridiales    | Veillonellaceae   | Veillonella    | unclassified              |       |         |
| 50725 | 8459            | 7560   | 6884    | 7996      | 10195   | 11744    | 11536   | Bacteria                                                | Firmicutes       | Clostridia          | Clostridiales    | Veillonellaceae   | Veillonella    | unclassified              |       |         |
| 50574 | 8712            | 7580   | 6985    | 7313      | 10784   | 11930    | 11060   | Bacteria                                                | Firmicutes       | Clostridia          | Clostridiales    | Veillonellaceae   | Veillonella    | Veillonella dispar        |       |         |
| 58422 | 9261            | 9480   | 8146    | 8293      | 10684   | 12126    | 10875   | Bacteria                                                | Firmicutes       | Clostridia          | unclassified     | unclassified      | sfa            | unclassified              |       |         |
| 71919 | 9342            | 9511   | 7336    | 7451      | 11391   | 12018    | 11819   | Bacteria                                                | Fusobacteria     | Fusobacteria        | Fusobacteriales  | Fusobacteriaceae  | Leptotrichia   | unclassified              |       |         |
| 57878 | 8927            | 8687   | 6790    | 7388      | 11348   | 12385    | 11463   | Bacteria                                                | Gemmatimonadetes | Gemmatimonadetes    | Gemmatimonadales | Gemmatimonadaceae | Gemmatimonas   | unclassified              |       |         |
| 58123 | 10138           | 10605  | 10079   | 8872      | 12447   | 12929    | 12402   | Bacteria                                                | Gemmatimonadetes | Gemmatimonadetes    | Gemmatimonadales | Gemmatimonadaceae | Gemmatimonas   | unclassified              |       |         |
| 58535 | 8188            | 8945   | 6341    | 6902      | 11010   | 12502    | 11235   | Bacteria                                                | Gemmatimonadetes | Gemmatimonadetes    | Gemmatimonadales | Gemmatimonadaceae | unclassified   | unclassified              |       |         |
| 58567 | 10225           | 10813  | 10177   | 9243      | 12248   | 13345    | 12373   | Bacteria                                                | Gemmatimonadetes | Gemmatimonadetes    | Gemmatimonadales | Gemmatimonadaceae | unclassified   | unclassified              |       |         |
| 58619 | 9321            | 9762   | 9371    | 8557      | 11703   | 13227    | 11976   | Bacteria                                                | Gemmatimonadetes | Gemmatimonadetes    | Gemmatimonadales | Gemmatimonadaceae | unclassified   | unclassified              |       |         |
| 58625 | 8469            | 10034  | 8170    | 7388      | 11769   | 12922    | 11736   | Bacteria                                                | Gemmatimonadetes | Gemmatimonadetes    | Gemmatimonadales | Gemmatimonadaceae | unclassified   | unclassified              |       |         |
| 58728 | 10689           | 11191  | 10626   | 9540      | 11438   | 12265    | 11693   | Bacteria                                                | Gemmatimonadetes | Gemmatimonadetes    | unclassified     | unclassified      | sfg            | unclassified              |       |         |
| 58834 | 8909            | 9740   | 8844    | 7987      | 11230   | 12222    | 11786   | Bacteria                                                | Gemmatimonadetes | Gemmatimonadetes    | unclassified     | unclassified      | sfg            | unclassified              |       |         |
| 57992 | 11889           | 12960  | 11887   | 11044     | 13856   | 13853    | 13674   | Bacteria                                                | Gemmatimonadetes | Gemmatimonadetes    | unclassified     | unclassified      | sfa            | unclassified              |       |         |
| 58818 | 9602            | 10253  | 9132    | 7791      | 12350   | 12694    | 12163   | Bacteria                                                | GN04             | Shaw_812            | unclassified     | unclassified      | sfa            | unclassified              |       |         |
| 58316 | 8464            | 9580   | 8703    | 7955      | 12347   | 12603    | 12105   | Bacteria                                                | MD2896-826       | unclassified        | unclassified     | unclassified      | sfa            | unclassified              |       |         |
| 52294 | 8919            | 9510   | 7491    | 7641      | 11097   | 11848    | 11877   | Bacteria                                                | Planctomycetes   | C6                  | unclassified     | unclassified      | sfc            | unclassified              |       |         |
| 57308 | 9985            | 10694  | 9985    | 8854      | 12140   | 12730    | 12503   | Bacteria                                                | Planctomycetes   | Planctomycetes      | Gemmatales       | Isosphaeraceae    | Isosphaera     | unclassified              |       |         |
| 57019 | 7878            | 8174   | 6718    | 7092      | 10049   | 11877    | 11481   | Bacteria                                                | Planctomycetes   | Planctomycetes      | Gemmatales       | Isosphaeraceae    | unclassified   | unclassified              |       |         |
| 57583 | 8235            | 6943   | 10225   | 6971      | 11253   | 12210    | 12249   | Bacteria                                                | Planctomycetes   | Planctomycetes      | Gemmatales       | Isosphaeraceae    | unclassified   | unclassified              |       |         |
| 57616 | 9428            | 11368  | 8815    | 8878      | 11478   | 12717    | 11367   | Bacteria                                                | Planctomycetes   | Planctomycetes      | Gemmatales       | Isosphaeraceae    | unclassified   | unclassified              |       |         |
| 57357 | 9500            | 10283  | 8720    | 8292      | 12712   | 13622    | 13211   | Bacteria                                                | Planctomycetes   | Planctomycetes      | Planctomycetales | Planctomycetaceae | Planctomycetes | unclassified              |       |         |
| 58971 | 11668           | 11859  | 11840   | 11595     | 12954   | 12959    | 12540   | Bacteria                                                | Proteobacteria   | Alphaproteobacteria | Caulobacterales  | Caulobacteraceae  | Brevundimonas  | Brevundimonas diminuta    |       |         |
| 58987 | 10277           | 11099  | 9365    | 9432      | 12954   | 12942    | 12745   | Bacteria                                                | Proteobacteria   | Alphaproteobacteria | Caulobacterales  | Caulobacteraceae  | Brevundimonas  | Brevundimonas diminuta    |       |         |
| 59071 | 8117            | 7716   | 8383    | 7313      | 11775   | 11912    | 11851   | Bacteria                                                | Proteobacteria   | Alphaproteobacteria | Caulobacterales  | Caulobacteraceae  | Brevundimonas  | Brevundimonas diminuta    |       |         |
| 59158 | 10168           | 10584  | 10144   | 8628      | 12167   | 12159    | 12009   | Bacteria                                                | Proteobacteria   | Alphaproteobacteria | Caulobacterales  | Caulobacteraceae  | Brevundimonas  | Brevundimonas diminuta    |       |         |
| 59195 | 10144           | 10995  | 10075   | 8267      | 12144   | 12148    | 12047   | Bacteria                                                | Proteobacteria   | Alphaproteobacteria | Caulobacterales  | Caulobacteraceae  | Brevundimonas  | Brevundimonas diminuta    |       |         |
| 59196 | 11684           | 12097  | 11851   | 10665     | 13061   | 12877    | 12827   | Bacteria                                                | Proteobacteria   | Alphaproteobacteria | Caulobacterales  | Caulobacteraceae  | Brevundimonas  | Brevundimonas diminuta    |       |         |
| 59284 | 10881           | 11342  | 10273   | 10638     | 11822   | 12274    | 11821   | Bacteria                                                | Proteobacteria   | Alphaproteobacteria | Caulobacterales  | Caulobacteraceae  | Brevundimonas  | Brevundimonas diminuta    |       |         |
| 59317 | 9913            | 10604  | 9781    | 9234      | 11609   | 12156    | 11705   | Bacteria                                                | Proteobacteria   | Alphaproteobacteria | Caulobacterales  | Caulobacteraceae  | Brevundimonas  | Brevundimonas diminuta    |       |         |
| 59463 | 11029           | 9844   | 9684    | 9112      | 12801   | 13044    | 11789   | Bacteria                                                | Proteobacteria   | Alphaproteobacteria | Caulobacterales  | Caulobacteraceae  | Brevundimonas  | Brevundimonas diminuta    |       |         |
| 59960 | 10665           | 11365  | 10790   | 9867      | 12504   | 12494    | 12501   | Bacteria                                                | Proteobacteria   | Alphaproteobacteria | Caulobacterales  | Caulobacteraceae  | Brevundimonas  | Brevundimonas diminuta    |       |         |
| 60065 | 8201            | 9020   | 9600    | 7908      | 12185   | 12116    | 12081   | Bacteria                                                | Proteobacteria   | Alphaproteobacteria | Caulobacterales  | Caulobacteraceae  | Brevundimonas  | Brevundimonas diminuta    |       |         |
| 59894 | 8261            | 9594   | 8019    | 6761      | 12619   | 11772    | 11585   | Bacteria                                                | Proteobacteria   | Alphaproteobacteria | Caulobacterales  | Caulobacteraceae  | Brevundimonas  | Brevundimonas diminuta    |       |         |
| 59062 | 10724           | 11200  | 10439   | 10462     | 13177   | 12996    | 12758   | Bacteria                                                | Proteobacteria   | Alphaproteobacteria | Caulobacterales  | Caulobacteraceae  | Brevundimonas  | unclassified              |       |         |
| 59178 | 8500            | 10517  | 9592    | 8464      | 13263   | 12649    | 12344   | Bacteria                                                | Proteobacteria   | Alphaproteobacteria | Caulobacterales  | Caulobacteraceae  | Brevundimonas  | unclassified              |       |         |
| 59148 | 8490            | 9684   | 8097    | 7448      | 12042   | 11984    | 11666   | Bacteria                                                | Proteobacteria   | Alphaproteobacteria | Caulobacterales  | Caulobacteraceae  | Brevundimonas  | unclassified              |       |         |
| 59875 | 9624            | 10495  | 9330    | 8873      | 12682   | 12761    | 12695   | Bacteria                                                | Proteobacteria   | Alphaproteobacteria | Caulobacterales  | Caulobacteraceae  | Brevundimonas  | unclassified              |       |         |
| 60072 | 7809            | 9345   | 7291    | 6516      | 12352   | 12304    | 11656   | Bacteria                                                | Proteobacteria   | Alphaproteobacteria | Caulobacterales  | Caulobacteraceae  | Brevundimonas  | unclassified              |       |         |
| 60100 | 9676            | 10347  | 10018   | 8394      | 11954   | 12029    | 11751   | Bacteria                                                | Proteobacteria   | Alphaproteobacteria | Caulobacterales  | Caulobacteraceae  | Brevundimonas  | unclassified              |       |         |
| 60119 | 8598            | 9735   | 8075    | 8387      | 12441   | 12149    | 12134   | Bacteria                                                | Proteobacteria   | Alphaproteobacteria | Caulobacterales  | Caulobacteraceae  | Brevundimonas  | unclassified              |       |         |
| 59321 | 10189           | 10966  | 10242   | 8756      | 11750   | 11839    | 11192   | Bacteria                                                | Proteobacteria   | Alphaproteobacteria | Caulobacterales  | Caulobacteraceae  | Caulobacter    | unclassified              |       |         |
| 59959 | 10064           | 10863  | 9966    | 9744      | 12239   | 12717    | 12218   | Bacteria                                                | Proteobacteria   | Alphaproteobacteria | Caulobacterales  | Caulobacteraceae  | Cyoclobacter   | unclassified              |       |         |
| 58959 | 8304            | 7477   | 8721    | 6594      | 11561   | 11930    | 11758   | Bacteria                                                | Proteobacteria   | Alphaproteobacteria | Caulobacterales  | Caulobacteraceae  | Mycobacter     | unclassified              |       |         |
| 59318 | 8132            | 7662   | 8087    | 7260      | 12254   | 12216    | 12493   | Bacteria                                                | Proteobacteria   | Alphaproteobacteria | Caulobacterales  | Caulobacteraceae  | Mycobacter     | unclassified              |       |         |
| 59209 | 10105           | 9378   | 9339    | 8926      | 12166   | 12394    | 12020   | Bacteria                                                | Proteobacteria   | Alphaproteobacteria | Caulobacterales  | Caulobacteraceae  | unclassified   | unclassified              |       |         |
| 59421 | 10734           | 11750  | 10673   | 10286     | 12404   | 13018    | 12645   | Bacteria                                                | Proteobacteria   | Alphaproteobacteria | Caulobacterales  | Caulobacteraceae  | unclassified   | unclassified              |       |         |
| 59755 | 8778            | 8072   | 8795    | 8236      | 12565   | 11975    | 11984   | Bacteria                                                | Proteobacteria   | Alphaproteobacteria | Caulobacterales  | Caulobacteraceae  | unclassified   | unclassified              |       |         |
| 59770 | 8923            | 7549   | 9224    | 7286      | 12537   | 12339    | 11869   | Bacteria                                                | Proteobacteria   | Alphaproteobacteria | Caulobacterales  | Caulobacteraceae  | unclassified   | unclassified              |       |         |
| 60050 | 9039            | 10034  | 8555    | 7604      | 11879   | 12359    | 12027   | Bacteria                                                | Proteobacteria   | Alphaproteobacteria | Caulobacterales  | Caulobacteraceae  | unclassified   | unclassified              |       |         |
| 60071 | 9698            | 10177  | 10052   | 9114      | 12213   | 13263    | 12510   | Bacteria                                                | Proteobacteria   | Alphaproteobacteria | Caulobacterales  | Caulobacteraceae  | unclassified   | unclassified              |       |         |
| 59989 | 14000           | 14218  | 14173   | 13535     | 12252   | 12633    | 12423   | Bacteria                                                | Proteobacteria   | Alphaproteobacteria | Rhizobiales      | Bradyrhizobiaceae | Afipia         | Afipia bromaeae           |       |         |
| 60042 | 13722           | 14106  | 14026   | 13221     | 12143   | 12455    | 12953   | Bacteria                                                | Proteobacteria   | Alphaproteobacteria | Rhizobiales      | Bradyrhizobiaceae | Afipia         | unclassified              |       |         |
| 58889 | 10598           | 10812  | 10315   | 10047     | 12263   | 12644    | 12249   | Bacteria                                                | Proteobacteria   | Alphaproteobacteria | Rhizobiales      | Bradyrhizobiaceae | Bosea          | unclassified              |       |         |
| 59312 | 9026            | 7858   | 9728    | 7694      | 12246   | 12420    | 12162   | Bacteria                                                | Proteobacteria   | Alphaproteobacteria | Rhizobiales      | Bradyrhizobiaceae | Bosea          | unclassified              |       |         |
| 59235 | 8973            | 9657   | 7868    | 7843      | 12228   | 12419    | 12171   | Bacteria                                                | Proteobacteria   | Alphaproteobacteria | Rhizobiales      | Bradyrhizobiaceae | Bosea          | unclassified              |       |         |
| 58976 | 12694           | 12618  | 12545   | 11751     | 12407   | 12656    | 12989   | Bacteria                                                | Proteobacteria   | Alphaproteobacteria | Rhizobiales      | Bradyrhizobiaceae | Bradyrhizobium | Bradyrhizobium canariense |       |         |
| 58993 | 13521           | 14057  | 13708   | 13402     | 13283   | 13345    | 13384   | Bacteria                                                | Proteobacteria   | Alphaproteobacteria | Rhizobiales      | Bradyrhizobiaceae | Bradyrhizobium | Bradyrhizobium elkanii    |       |         |
| 59143 | 12444           | 12821  | 12659   | 11905     | 12403   | 12803    | 12778   | Bacteria                                                | Proteobacteria   | Alphaproteobacteria | Rhizobiales      | Bradyrhizobiaceae | Bradyrhizobium | unclassified              |       |         |
| 59486 | 12811           | 13198  | 13043   | 12508     | 11396   | 11956    | 12380   | Bacteria                                                | Proteobacteria   | Alphaproteobacteria | Rhizobiales      | Bradyrhizobiaceae | Bradyrhizobium | unclassified              |       |         |
| 59636 | 13250           | 13638  | 13566   | 12932     | 11917   | 12410    | 12711   | Bacteria                                                | Proteobacteria   | Alphaproteobacteria | Rhizobiales      | Bradyrhizobiaceae | Bradyrhizobium | unclassified              |       |         |
| 59983 | 13309           | 13504  | 13418   | 11153     | 12022   | 12443    | 12018   | Bacteria                                                | Proteobacteria   | Alphaproteobacteria | Rhizobiales      | Bradyrhizobiaceae | Bradyrhizobium | unclassified              |       |         |
| 59027 | 13128           | 13409  | 13456   | 12817     | 12825   | 12773    | 12541   | Bacteria                                                | Proteobacteria   | Alphaproteobacteria | Rhizobiales      | Bradyrhizobiaceae | unclassified   | unclassified              |       |         |
| 59127 | 10149           | 10165  | 10144   | 10323     | 12467   | 13272    | 12548   | Bacteria                                                | Proteobacteria   | Alphaproteobacteria | Rhizobiales      | Bradyrhizobiaceae | unclassified   | unclassified              |       |         |
| 59454 | 13737           | 13991  | 13820   | 13311     | 12951   | 13467    | 13639   | Bacteria                                                | Proteobacteria   | Alphaproteobacteria | Rhizobiales      | Bradyrhizobiaceae | unclassified   | unclassified              |       |         |
| 59524 | 12293           | 12715  | 13190   | 12026     | 11189   | 11810    | 11824   | Bacteria                                                | Proteobacteria   | Alphaproteobacteria | Rhizobiales      | Bradyrhizobiaceae | unclassified   | unclassified              |       |         |
| 60328 | 11859           | 12215  | 12080   | 11319     | 11592   | 12679    | 12051   | Bacteria                                                | Proteobacteria   | Alphaproteobacteria | Rhizobiales      | Hyphomicrobiaceae | Devosia        | unclassified              |       |         |
| 60472 | 12329           | 12880  | 12556   | 11979     | 12319   | 13209    | 12846   | Bacteria                                                | Proteobacteria   | Alphaproteobacteria | Rhizobiales      | Hyphomicrobiaceae | Devosia        | unclassified              |       |         |
| 61285 | 9718            | 9648   | 10022   | 8478      | 11741   | 12469    | 12036   | Bacteria                                                | Proteobacteria   | Alphaproteobacteria | Rhizobiales      | Hyphomicrobiaceae | Devosia        | unclassified              |       |         |
| 59047 | 11406           | 12094  | 11576   | 11317     | 12820   | 12199    | 12124   | Bacteria                                                | Proteobacteria   | Alphaproteobacteria | Rhizobiales      | Hyphomicrobiaceae | Rhodoplane     |                           |       |         |

Table S6 (part Q): Hy5Scores of OTUs that were called present in at least one of the samples. Taxonomic classifications are based on PhyloChip taxonomy (derived from GreenGenes). Please note, that data presented here was rank normalized before performing statistical analyses presented in the manuscript.

| OTU   | Sample ID (PMA) |        |        |         | Sample ID |       |       |       | Kingdom  | phylum         | class               | order            | Family             | genus                   | species                           |
|-------|-----------------|--------|--------|---------|-----------|-------|-------|-------|----------|----------------|---------------------|------------------|--------------------|-------------------------|-----------------------------------|
|       | OTU_PMA         | CO_PMA | CR_PMA | CRS_PMA | UR        | CRS   | CRS   | CRS   |          |                |                     |                  |                    |                         |                                   |
| 61966 | 11241           | 11741  | 11307  | 11056   | 12798     | 13120 | 11346 | 12214 | Bacteria | Proteobacteria | Alphaproteobacteria | Rhizobiales      | Phyllobacteriaceae | unclassified            | unclassified                      |
| 62194 | 11698           | 12427  | 12028  | 10905   | 7276      | 8699  | 10680 | 8911  | Bacteria | Proteobacteria | Alphaproteobacteria | Rhizobiales      | Phyllobacteriaceae | unclassified            | unclassified                      |
| 62538 | 9765            | 10359  | 9642   | 9049    | 11565     | 12500 | 11292 | 10967 | Bacteria | Proteobacteria | Alphaproteobacteria | Rhizobiales      | Phyllobacteriaceae | unclassified            | unclassified                      |
| 62819 | 9124            | 9149   | 8951   | 7794    | 10928     | 12130 | 11145 | 10621 | Bacteria | Proteobacteria | Alphaproteobacteria | Rhizobiales      | Phyllobacteriaceae | unclassified            | unclassified                      |
| 61693 | 9072            | 9484   | 8015   | 7985    | 11508     | 12427 | 11492 | 12088 | Bacteria | Proteobacteria | Alphaproteobacteria | Rhizobiales      | Rhizobiaceae       | Agrobacterium           | Agrobacterium rubi                |
| 62512 | 9233            | 9599   | 8512   | 8009    | 11197     | 12153 | 11230 | 11998 | Bacteria | Proteobacteria | Alphaproteobacteria | Rhizobiales      | Rhizobiaceae       | Agrobacterium           | Agrobacterium rubi                |
| 61785 | 10018           | 8962   | 7624   | 7861    | 12201     | 11747 | 11022 | 11186 | Bacteria | Proteobacteria | Alphaproteobacteria | Rhizobiales      | Rhizobiaceae       | Agrobacterium           | Agrobacterium                     |
| 62086 | 10374           | 10941  | 10377  | 9103    | 11609     | 12527 | 11861 | 11989 | Bacteria | Proteobacteria | Alphaproteobacteria | Rhizobiales      | Rhizobiaceae       | Candidatus Liberibacter | Candidatus Liberibacter africanus |
| 61385 | 9866            | 10574  | 9769   | 9684    | 11798     | 12087 | 11050 | 11384 | Bacteria | Proteobacteria | Alphaproteobacteria | Rhizobiales      | Rhizobiaceae       | Rhizobium               | unclassified                      |
| 61764 | 9415            | 8896   | 8474   | 8380    | 11282     | 12832 | 11333 | 11820 | Bacteria | Proteobacteria | Alphaproteobacteria | Rhizobiales      | Rhizobiaceae       | Rhizobium               | unclassified                      |
| 61774 | 9413            | 10331  | 9450   | 8258    | 11697     | 12049 | 11005 | 11315 | Bacteria | Proteobacteria | Alphaproteobacteria | Rhizobiales      | Rhizobiaceae       | Rhizobium               | unclassified                      |
| 61810 | 9682            | 9597   | 8885   | 8363    | 12392     | 12886 | 12059 | 12518 | Bacteria | Proteobacteria | Alphaproteobacteria | Rhizobiales      | Rhizobiaceae       | Rhizobium               | unclassified                      |
| 61913 | 10296           | 11044  | 10539  | 9648    | 11714     | 12070 | 11035 | 11342 | Bacteria | Proteobacteria | Alphaproteobacteria | Rhizobiales      | Rhizobiaceae       | Rhizobium               | unclassified                      |
| 62320 | 9866            | 10574  | 9769   | 9684    | 11798     | 12087 | 11050 | 11384 | Bacteria | Proteobacteria | Alphaproteobacteria | Rhizobiales      | Rhizobiaceae       | Rhizobium               | unclassified                      |
| 62419 | 9141            | 9378   | 8652   | 8345    | 11639     | 11975 | 10887 | 11190 | Bacteria | Proteobacteria | Alphaproteobacteria | Rhizobiales      | Rhizobiaceae       | Rhizobium               | unclassified                      |
| 62424 | 7892            | 9742   | 6485   | 7226    | 8696      | 12691 | 9165  | 9042  | Bacteria | Proteobacteria | Alphaproteobacteria | Rhizobiales      | Rhizobiaceae       | Rhizobium               | unclassified                      |
| 62439 | 9793            | 9797   | 9122   | 8447    | 12255     | 12604 | 11511 | 11662 | Bacteria | Proteobacteria | Alphaproteobacteria | Rhizobiales      | Rhizobiaceae       | Rhizobium               | unclassified                      |
| 62450 | 8052            | 10011  | 6447   | 6780    | 8851      | 13108 | 8533  | 8968  | Bacteria | Proteobacteria | Alphaproteobacteria | Rhizobiales      | Rhizobiaceae       | Rhizobium               | unclassified                      |
| 62669 | 10134           | 10933  | 10331  | 9418    | 11762     | 12090 | 11277 | 11476 | Bacteria | Proteobacteria | Alphaproteobacteria | Rhizobiales      | Rhizobiaceae       | Rhizobium               | unclassified                      |
| 62760 | 10038           | 10667  | 9842   | 9971    | 11979     | 12302 | 11403 | 11642 | Bacteria | Proteobacteria | Alphaproteobacteria | Rhizobiales      | Rhizobiaceae       | Rhizobium               | unclassified                      |
| 62812 | 9098            | 9497   | 8654   | 8321    | 11641     | 11918 | 10850 | 11199 | Bacteria | Proteobacteria | Alphaproteobacteria | Rhizobiales      | Rhizobiaceae       | Rhizobium               | unclassified                      |
| 61935 | 9215            | 8723   | 8253   | 8048    | 11484     | 12839 | 11622 | 11717 | Bacteria | Proteobacteria | Alphaproteobacteria | Rhizobiales      | Rhizobiaceae       | Shinella                | unclassified                      |
| 59070 | 12274           | 12617  | 12730  | 11691   | 11908     | 12526 | 12588 | 12435 | Bacteria | Proteobacteria | Alphaproteobacteria | Rhizobiales      | unclassified       | sFA                     | unclassified                      |
| 59396 | 9222            | 9211   | 8851   | 8533    | 10741     | 11675 | 11279 | 10830 | Bacteria | Proteobacteria | Alphaproteobacteria | Rhizobiales      | unclassified       | sFA                     | unclassified                      |
| 61538 | 9091            | 8824   | 7530   | 7380    | 11176     | 11845 | 10370 | 10458 | Bacteria | Proteobacteria | Alphaproteobacteria | Rhizobiales      | unclassified       | sFA                     | unclassified                      |
| 62664 | 11267           | 10622  | 9254   | 9067    | 13138     | 13797 | 12985 | 13249 | Bacteria | Proteobacteria | Alphaproteobacteria | Rhizobiales      | unclassified       | sFA                     | unclassified                      |
| 59053 | 12658           | 12865  | 12593  | 11746   | 12613     | 12848 | 12959 | 13102 | Bacteria | Proteobacteria | Alphaproteobacteria | Rhizobiales      | Xanthobacteraceae  | unclassified            | unclassified                      |
| 60560 | 9606            | 10109  | 9370   | 8901    | 11327     | 12119 | 11608 | 11735 | Bacteria | Proteobacteria | Alphaproteobacteria | Rhodobacterales  | Hyphomonadaceae    | Cephaliculis            | unclassified                      |
| 62391 | 9760            | 8784   | 8132   | 7902    | 11881     | 12725 | 11329 | 11974 | Bacteria | Proteobacteria | Alphaproteobacteria | Rhodobacterales  | Rhodobacteraceae   | Nautella                | Nautella italica                  |
| 61909 | 9014            | 10083  | 6956   | 7455    | 12505     | 13285 | 13123 | 12986 | Bacteria | Proteobacteria | Alphaproteobacteria | Rhodobacterales  | Rhodobacteraceae   | Paracoccus              | Paracoccus aminovorans            |
| 62521 | 8311            | 8572   | 6890   | 7057    | 11233     | 12439 | 11849 | 11773 | Bacteria | Proteobacteria | Alphaproteobacteria | Rhodobacterales  | Rhodobacteraceae   | Paracoccus              | Paracoccus aminovorans            |
| 62769 | 10175           | 8673   | 8527   | 8391    | 12448     | 12804 | 12911 | 12723 | Bacteria | Proteobacteria | Alphaproteobacteria | Rhodobacterales  | Rhodobacteraceae   | Paracoccus              | Paracoccus aminovorans            |
| 62585 | 9632            | 9455   | 6016   | 6620    | 11960     | 12166 | 13139 | 12430 | Bacteria | Proteobacteria | Alphaproteobacteria | Rhodobacterales  | Rhodobacteraceae   | Paracoccus              | Paracoccus yeel                   |
| 61983 | 10617           | 10465  | 11843  | 8551    | 13407     | 13793 | 13403 | 13698 | Bacteria | Proteobacteria | Alphaproteobacteria | Rhodobacterales  | Rhodobacteraceae   | Paracoccus              | unclassified                      |
| 61984 | 8077            | 9312   | 6430   | 6440    | 10087     | 11875 | 11708 | 10446 | Bacteria | Proteobacteria | Alphaproteobacteria | Rhodobacterales  | Rhodobacteraceae   | Paracoccus              | unclassified                      |
| 62220 | 9935            | 11663  | 9464   | 8276    | 12173     | 13365 | 12434 | 12455 | Bacteria | Proteobacteria | Alphaproteobacteria | Rhodobacterales  | Rhodobacteraceae   | Paracoccus              | unclassified                      |
| 62280 | 10536           | 10962  | 9212   | 8164    | 12595     | 13206 | 12895 | 12986 | Bacteria | Proteobacteria | Alphaproteobacteria | Rhodobacterales  | Rhodobacteraceae   | Paracoccus              | unclassified                      |
| 62348 | 10237           | 10553  | 9035   | 8738    | 12556     | 13252 | 13056 | 13096 | Bacteria | Proteobacteria | Alphaproteobacteria | Rhodobacterales  | Rhodobacteraceae   | Paracoccus              | unclassified                      |
| 62371 | 11489           | 12227  | 10266  | 9743    | 13630     | 14032 | 13967 | 13909 | Bacteria | Proteobacteria | Alphaproteobacteria | Rhodobacterales  | Rhodobacteraceae   | Paracoccus              | unclassified                      |
| 62476 | 9826            | 11466  | 7954   | 8198    | 12793     | 13629 | 13429 | 13240 | Bacteria | Proteobacteria | Alphaproteobacteria | Rhodobacterales  | Rhodobacteraceae   | Paracoccus              | unclassified                      |
| 62719 | 10822           | 10018  | 9842   | 9971    | 11979     | 12302 | 11403 | 11642 | Bacteria | Proteobacteria | Alphaproteobacteria | Rhodobacterales  | Rhodobacteraceae   | Paracoccus              | unclassified                      |
| 62734 | 10405           | 7372   | 6825   | 6825    | 11983     | 12990 | 12415 | 12829 | Bacteria | Proteobacteria | Alphaproteobacteria | Rhodobacterales  | Rhodobacteraceae   | Paracoccus              | unclassified                      |
| 62890 | 9180            | 9178   | 7048   | 7726    | 11826     | 12707 | 12316 | 12228 | Bacteria | Proteobacteria | Alphaproteobacteria | Rhodobacterales  | Rhodobacteraceae   | Paracoccus              | unclassified                      |
| 61473 | 8969            | 10318  | 6987   | 7551    | 12035     | 13262 | 12473 | 12978 | Bacteria | Proteobacteria | Alphaproteobacteria | Rhodobacterales  | Rhodobacteraceae   | Rubellimicrobium        | unclassified                      |
| 61677 | 9858            | 10901  | 8984   | 8742    | 12936     | 13649 | 13251 | 13466 | Bacteria | Proteobacteria | Alphaproteobacteria | Rhodobacterales  | Rhodobacteraceae   | Rubellimicrobium        | unclassified                      |
| 61835 | 10023           | 10875  | 10321  | 9813    | 12538     | 13447 | 12700 | 13260 | Bacteria | Proteobacteria | Alphaproteobacteria | Rhodobacterales  | Rhodobacteraceae   | Rubellimicrobium        | unclassified                      |
| 62825 | 9421            | 9804   | 9009   | 8476    | 11590     | 12560 | 11989 | 12110 | Bacteria | Proteobacteria | Alphaproteobacteria | Rhodobacterales  | Rhodobacteraceae   | Rubellimicrobium        | unclassified                      |
| 61317 | 10023           | 10842  | 10262  | 8513    | 12861     | 13798 | 13612 | 13098 | Bacteria | Proteobacteria | Alphaproteobacteria | Rhodobacterales  | Rhodobacteraceae   | unclassified            | unclassified                      |
| 61612 | 9861            | 9951   | 8979   | 8499    | 11886     | 13108 | 11951 | 11814 | Bacteria | Proteobacteria | Alphaproteobacteria | Rhodobacterales  | Rhodobacteraceae   | unclassified            | unclassified                      |
| 61699 | 8980            | 9958   | 8732   | 7970    | 11395     | 13320 | 11965 | 11784 | Bacteria | Proteobacteria | Alphaproteobacteria | Rhodobacterales  | Rhodobacteraceae   | unclassified            | unclassified                      |
| 62019 | 9434            | 10259  | 9744   | 9603    | 10594     | 12797 | 11014 | 11541 | Bacteria | Proteobacteria | Alphaproteobacteria | Rhodobacterales  | Rhodobacteraceae   | unclassified            | unclassified                      |
| 62417 | 9555            | 9809   | 9048   | 8089    | 11594     | 12631 | 11963 | 11802 | Bacteria | Proteobacteria | Alphaproteobacteria | Rhodobacterales  | Rhodobacteraceae   | unclassified            | unclassified                      |
| 62496 | 11467           | 11756  | 11064  | 10270   | 12912     | 13498 | 13053 | 12996 | Bacteria | Proteobacteria | Alphaproteobacteria | Rhodobacterales  | Rhodobacteraceae   | unclassified            | unclassified                      |
| 62578 | 11007           | 11694  | 10747  | 9311    | 13855     | 14397 | 13924 | 14119 | Bacteria | Proteobacteria | Alphaproteobacteria | Rhodobacterales  | Rhodobacteraceae   | unclassified            | unclassified                      |
| 62724 | 9748            | 9251   | 8246   | 8678    | 11608     | 11676 | 10707 | 10776 | Bacteria | Proteobacteria | Alphaproteobacteria | Rhodobacterales  | Rhodobacteraceae   | unclassified            | unclassified                      |
| 62790 | 9937            | 10227  | 9627   | 8672    | 11320     | 12321 | 11787 | 11955 | Bacteria | Proteobacteria | Alphaproteobacteria | Rhodobacterales  | Rhodobacteraceae   | unclassified            | unclassified                      |
| 62853 | 10260           | 11131  | 9107   | 8661    | 12183     | 13384 | 12806 | 12607 | Bacteria | Proteobacteria | Alphaproteobacteria | Rhodobacterales  | Rhodobacteraceae   | unclassified            | unclassified                      |
| 62927 | 10516           | 10230  | 8701   | 8790    | 11944     | 12379 | 11664 | 12181 | Bacteria | Proteobacteria | Alphaproteobacteria | Rhodobacterales  | Rhodobacteraceae   | unclassified            | unclassified                      |
| 61082 | 8555            | 8361   | 6668   | 6917    | 10582     | 12415 | 11405 | 11731 | Bacteria | Proteobacteria | Alphaproteobacteria | Rhodospirillales | Acetobacteraceae   | Acidithiobacillus       | unclassified                      |
| 60231 | 7226            | 6209   | 6154   | 6338    | 10563     | 12048 | 11830 | 12125 | Bacteria | Proteobacteria | Alphaproteobacteria | Rhodospirillales | Acetobacteraceae   | Roseomonas              | unclassified                      |
| 60467 | 11200           | 11545  | 11200  | 10458   | 12874     | 13588 | 13189 | 13529 | Bacteria | Proteobacteria | Alphaproteobacteria | Rhodospirillales | Acetobacteraceae   | Roseomonas              | unclassified                      |
| 60479 | 10398           | 10239  | 9136   | 8642    | 12714     | 13166 | 12862 | 12909 | Bacteria | Proteobacteria | Alphaproteobacteria | Rhodospirillales | Acetobacteraceae   | Roseomonas              | unclassified                      |
| 60851 | 8302            | 8124   | 6846   | 6861    | 10858     | 11892 | 11141 | 11718 | Bacteria | Proteobacteria | Alphaproteobacteria | Rhodospirillales | Acetobacteraceae   | Roseomonas              | unclassified                      |
| 60378 | 9907            | 10826  | 7110   | 7854    | 12255     | 13265 | 12348 | 12990 | Bacteria | Proteobacteria | Alphaproteobacteria | Rhodospirillales | Acetobacteraceae   | Roseomonas              | unclassified                      |
| 60523 | 10205           | 11302  | 9155   | 10072   | 12746     | 13594 | 12990 | 13498 | Bacteria | Proteobacteria | Alphaproteobacteria | Rhodospirillales | Acetobacteraceae   | unclassified            | unclassified                      |
| 60926 | 10411           | 10001  | 8971   | 9865    | 11927     | 12743 | 12171 | 12435 | Bacteria | Proteobacteria | Alphaproteobacteria | Rhodospirillales | Acetobacteraceae   | unclassified            | unclassified                      |
| 59837 | 9150            | 9500   | 8416   | 8255    | 10893     | 12457 | 12843 | 12133 | Bacteria | Proteobacteria | Alphaproteobacteria | Rhodospirillales | Rhodospirillaceae  | Skermaniella            | unclassified                      |
| 61015 | 8420            | 8341   | 8307   | 7942    | 10256     | 11626 | 11583 | 11025 | Bacteria | Proteobacteria | Alphaproteobacteria | Rhodospirillales |                    |                         |                                   |

Table S6 (part R): HybScores of OTUs that were called present in at least one of the samples. Taxonomic classifications are based on PhyloChip taxonomy (derived from GreenGenes). Please note, that data presented here was rank normalized before performing statistical analyses presented in the manuscript.

| OTU   | Sample ID (PMA) |         |         | Sample ID |         |         | kingdom | phylum | class    | taxonomic classification of representative rOTU cluster |                     |                  |                  | genus           | species                     |
|-------|-----------------|---------|---------|-----------|---------|---------|---------|--------|----------|---------------------------------------------------------|---------------------|------------------|------------------|-----------------|-----------------------------|
|       | CRS_PMA         | CRS_PMA | CRS_PMA | CRS_PMA   | CRS_PMA | CRS_PMA |         |        |          | Family                                                  | Order               | Family           | Order            |                 |                             |
| 61355 | 12877           | 13259   | 13356   | 12117     | 12479   | 13031   | 12706   | 12932  | Bacteria | Proteobacteria                                          | Alphaproteobacteria | Sphingomonadales | Sphingomonadales | Novosphingobium | unclassified                |
| 60374 | 13062           | 13355   | 13056   | 12069     | 12373   | 12970   | 12635   | 12750  | Bacteria | Proteobacteria                                          | Alphaproteobacteria | Sphingomonadales | Sphingomonadales | Sphingobium     | Sphingobium herbicidovorans |
| 60291 | 12880           | 13118   | 12720   | 11911     | 11840   | 12364   | 12132   | 12316  | Bacteria | Proteobacteria                                          | Alphaproteobacteria | Sphingomonadales | Sphingomonadales | Sphingobium     | unclassified                |
| 60301 | 10176           | 11383   | 9696    | 7758      | 11177   | 11764   | 11028   | 10942  | Bacteria | Proteobacteria                                          | Alphaproteobacteria | Sphingomonadales | Sphingomonadales | Sphingobium     | unclassified                |
| 60332 | 11266           | 12147   | 10747   | 6519      | 10195   | 12106   | 11292   | 11288  | Bacteria | Proteobacteria                                          | Alphaproteobacteria | Sphingomonadales | Sphingomonadales | Sphingobium     | unclassified                |
| 60395 | 12489           | 13261   | 12629   | 11341     | 12369   | 13047   | 12515   | 12176  | Bacteria | Proteobacteria                                          | Alphaproteobacteria | Sphingomonadales | Sphingomonadales | Sphingobium     | unclassified                |
| 60412 | 12574           | 12517   | 12277   | 11362     | 12537   | 13112   | 12653   | 12068  | Bacteria | Proteobacteria                                          | Alphaproteobacteria | Sphingomonadales | Sphingomonadales | Sphingobium     | unclassified                |
| 60538 | 9071            | 9885    | 8654    | 8002      | 12421   | 10261   | 9936    | 9818   | Bacteria | Proteobacteria                                          | Alphaproteobacteria | Sphingomonadales | Sphingomonadales | Sphingobium     | unclassified                |
| 60557 | 9071            | 9885    | 8654    | 8002      | 12421   | 10261   | 9936    | 9818   | Bacteria | Proteobacteria                                          | Alphaproteobacteria | Sphingomonadales | Sphingomonadales | Sphingobium     | unclassified                |
| 60579 | 11429           | 12306   | 11466   | 10119     | 9935    | 11327   | 11057   | 10472  | Bacteria | Proteobacteria                                          | Alphaproteobacteria | Sphingomonadales | Sphingomonadales | Sphingobium     | unclassified                |
| 60732 | 12598           | 13065   | 12416   | 10570     | 11890   | 12581   | 12350   | 12601  | Bacteria | Proteobacteria                                          | Alphaproteobacteria | Sphingomonadales | Sphingomonadales | Sphingobium     | unclassified                |
| 60822 | 9145            | 9935    | 8803    | 8090      | 12438   | 10610   | 10158   | 10191  | Bacteria | Proteobacteria                                          | Alphaproteobacteria | Sphingomonadales | Sphingomonadales | Sphingobium     | unclassified                |
| 60902 | 11073           | 11444   | 11094   | 11035     | 12344   | 12867   | 12261   | 12267  | Bacteria | Proteobacteria                                          | Alphaproteobacteria | Sphingomonadales | Sphingomonadales | Sphingobium     | unclassified                |
| 60970 | 10598           | 11765   | 10525   | 8540      | 12003   | 11854   | 11091   | 11005  | Bacteria | Proteobacteria                                          | Alphaproteobacteria | Sphingomonadales | Sphingomonadales | Sphingobium     | unclassified                |
| 61013 | 11325           | 12153   | 10728   | 10325     | 13346   | 12640   | 10225   | 12707  | Bacteria | Proteobacteria                                          | Alphaproteobacteria | Sphingomonadales | Sphingomonadales | Sphingobium     | unclassified                |
| 61101 | 10192           | 10759   | 10269   | 8609      | 12289   | 10940   | 10638   | 10555  | Bacteria | Proteobacteria                                          | Alphaproteobacteria | Sphingomonadales | Sphingomonadales | Sphingobium     | unclassified                |
| 61127 | 11847           | 12292   | 11947   | 11199     | 9133    | 9903    | 10518   | 9613   | Bacteria | Proteobacteria                                          | Alphaproteobacteria | Sphingomonadales | Sphingomonadales | Sphingobium     | unclassified                |
| 61290 | 9807            | 10526   | 9412    | 9495      | 12123   | 11746   | 10942   | 11108  | Bacteria | Proteobacteria                                          | Alphaproteobacteria | Sphingomonadales | Sphingomonadales | Sphingobium     | unclassified                |
| 61302 | 11966           | 12837   | 11782   | 7916      | 11257   | 12170   | 11634   | 11570  | Bacteria | Proteobacteria                                          | Alphaproteobacteria | Sphingomonadales | Sphingomonadales | Sphingobium     | unclassified                |
| 61327 | 11539           | 12426   | 11458   | 10138     | 10636   | 11424   | 11138   | 10515  | Bacteria | Proteobacteria                                          | Alphaproteobacteria | Sphingomonadales | Sphingomonadales | Sphingobium     | unclassified                |
| 61602 | 12812           | 13070   | 12704   | 11866     | 9760    | 10822   | 11443   | 11087  | Bacteria | Proteobacteria                                          | Alphaproteobacteria | Sphingomonadales | Sphingomonadales | Sphingomonas    | Caulobacter leidyia         |
| 62007 | 10028           | 10164   | 9841    | 8771      | 10874   | 11794   | 11201   | 11854  | Bacteria | Proteobacteria                                          | Alphaproteobacteria | Sphingomonadales | Sphingomonadales | Sphingomonas    | Sphingomonas saccharolytica |
| 62025 | 10679           | 11166   | 10683   | 9743      | 11123   | 12649   | 12198   | 12112  | Bacteria | Proteobacteria                                          | Alphaproteobacteria | Sphingomonadales | Sphingomonadales | Sphingomonas    | Sphingomonas wittichii      |
| 62078 | 10008           | 10109   | 9623    | 8429      | 10653   | 12120   | 11118   | 11193  | Bacteria | Proteobacteria                                          | Alphaproteobacteria | Sphingomonadales | Sphingomonadales | Sphingomonas    | Sphingomonas wittichii      |
| 60430 | 10504           | 11757   | 10361   | 7583      | 11607   | 12346   | 11969   | 12287  | Bacteria | Proteobacteria                                          | Alphaproteobacteria | Sphingomonadales | Sphingomonadales | Sphingomonas    | Sphingomonas wittichii      |
| 61106 | 9111            | 9785    | 8974    | 8432      | 11026   | 10401   | 12469   | 10130  | Bacteria | Proteobacteria                                          | Alphaproteobacteria | Sphingomonadales | Sphingomonadales | Sphingomonas    | Sphingomonas yabuuchiae     |
| 60291 | 13338           | 13989   | 12909   | 12900     | 12800   | 12178   | 12911   | 12018  | Bacteria | Proteobacteria                                          | Alphaproteobacteria | Sphingomonadales | Sphingomonadales | Sphingomonas    | unclassified                |
| 60315 | 12579           | 12921   | 12605   | 11656     | 11856   | 12200   | 12144   | 12253  | Bacteria | Proteobacteria                                          | Alphaproteobacteria | Sphingomonadales | Sphingomonadales | Sphingomonas    | unclassified                |
| 60348 | 13051           | 13629   | 13170   | 11671     | 12467   | 13007   | 13125   | 13233  | Bacteria | Proteobacteria                                          | Alphaproteobacteria | Sphingomonadales | Sphingomonadales | Sphingomonas    | unclassified                |
| 60351 | 10264           | 10803   | 10357   | 10110     | 11318   | 11741   | 11574   | 11829  | Bacteria | Proteobacteria                                          | Alphaproteobacteria | Sphingomonadales | Sphingomonadales | Sphingomonas    | unclassified                |
| 60398 | 11714           | 12292   | 11936   | 11095     | 10559   | 11614   | 11334   | 11420  | Bacteria | Proteobacteria                                          | Alphaproteobacteria | Sphingomonadales | Sphingomonadales | Sphingomonas    | unclassified                |
| 60449 | 11982           | 11914   | 11623   | 10543     | 9945    | 11943   | 10407   | 10690  | Bacteria | Proteobacteria                                          | Alphaproteobacteria | Sphingomonadales | Sphingomonadales | Sphingomonas    | unclassified                |
| 60564 | 11341           | 11512   | 10574   | 9471      | 10826   | 11847   | 11188   | 11731  | Bacteria | Proteobacteria                                          | Alphaproteobacteria | Sphingomonadales | Sphingomonadales | Sphingomonas    | unclassified                |
| 60568 | 12045           | 12048   | 11518   | 10188     | 11370   | 12659   | 12217   | 12471  | Bacteria | Proteobacteria                                          | Alphaproteobacteria | Sphingomonadales | Sphingomonadales | Sphingomonas    | unclassified                |
| 60672 | 11883           | 12297   | 11818   | 11280     | 11688   | 12229   | 12029   | 12165  | Bacteria | Proteobacteria                                          | Alphaproteobacteria | Sphingomonadales | Sphingomonadales | Sphingomonas    | unclassified                |
| 60758 | 12325           | 12538   | 12940   | 11644     | 11551   | 12211   | 12008   | 11962  | Bacteria | Proteobacteria                                          | Alphaproteobacteria | Sphingomonadales | Sphingomonadales | Sphingomonas    | unclassified                |
| 60770 | 10773           | 11769   | 10673   | 9876      | 11206   | 12233   | 12131   | 12015  | Bacteria | Proteobacteria                                          | Alphaproteobacteria | Sphingomonadales | Sphingomonadales | Sphingomonas    | unclassified                |
| 60826 | 11458           | 12131   | 11317   | 10606     | 12947   | 13037   | 12763   | 13019  | Bacteria | Proteobacteria                                          | Alphaproteobacteria | Sphingomonadales | Sphingomonadales | Sphingomonas    | unclassified                |
| 60827 | 12841           | 13239   | 12876   | 11783     | 12012   | 12461   | 12350   | 12428  | Bacteria | Proteobacteria                                          | Alphaproteobacteria | Sphingomonadales | Sphingomonadales | Sphingomonas    | unclassified                |
| 60858 | 12276           | 12665   | 12592   | 11902     | 10733   | 11849   | 11598   | 11623  | Bacteria | Proteobacteria                                          | Alphaproteobacteria | Sphingomonadales | Sphingomonadales | Sphingomonas    | unclassified                |
| 60913 | 12467           | 12597   | 12597   | 11041     | 12172   | 12154   | 11918   | 12067  | Bacteria | Proteobacteria                                          | Alphaproteobacteria | Sphingomonadales | Sphingomonadales | Sphingomonas    | unclassified                |
| 60966 | 11106           | 12025   | 11485   | 10370     | 12414   | 11160   | 12317   | 11815  | Bacteria | Proteobacteria                                          | Alphaproteobacteria | Sphingomonadales | Sphingomonadales | Sphingomonas    | unclassified                |
| 61062 | 10792           | 11178   | 10170   | 9525      | 11677   | 12162   | 11843   | 11931  | Bacteria | Proteobacteria                                          | Alphaproteobacteria | Sphingomonadales | Sphingomonadales | Sphingomonas    | unclassified                |
| 61087 | 11093           | 11916   | 10704   | 10070     | 13258   | 13145   | 12274   | 12907  | Bacteria | Proteobacteria                                          | Alphaproteobacteria | Sphingomonadales | Sphingomonadales | Sphingomonas    | unclassified                |
| 61158 | 12838           | 13249   | 12898   | 11890     | 11513   | 12150   | 12066   | 12055  | Bacteria | Proteobacteria                                          | Alphaproteobacteria | Sphingomonadales | Sphingomonadales | Sphingomonas    | unclassified                |
| 61191 | 12766           | 13072   | 12817   | 12264     | 11092   | 12449   | 12270   | 12206  | Bacteria | Proteobacteria                                          | Alphaproteobacteria | Sphingomonadales | Sphingomonadales | Sphingomonas    | unclassified                |
| 61336 | 11224           | 10992   | 11202   | 9068      | 10964   | 12017   | 11367   | 11616  | Bacteria | Proteobacteria                                          | Alphaproteobacteria | Sphingomonadales | Sphingomonadales | Sphingomonas    | unclassified                |
| 60697 | 10766           | 11163   | 10665   | 10961     | 11763   | 12464   | 12024   | 11694  | Bacteria | Proteobacteria                                          | Alphaproteobacteria | Sphingomonadales | Sphingomonadales | Sphingopyxis    | unclassified                |
| 60752 | 10545           | 12072   | 10454   | 10852     | 12071   | 12625   | 12329   | 12783  | Bacteria | Proteobacteria                                          | Alphaproteobacteria | Sphingomonadales | Sphingomonadales | unclassified    | unclassified                |
| 60902 | 10267           | 10427   | 9973    | 8931      | 11079   | 11714   | 10908   | 11362  | Bacteria | Proteobacteria                                          | Alphaproteobacteria | Sphingomonadales | Sphingomonadales | unclassified    | unclassified                |
| 60840 | 10256           | 11084   | 9456    | 8329      | 10752   | 11828   | 10996   | 11304  | Bacteria | Proteobacteria                                          | Alphaproteobacteria | Sphingomonadales | Sphingomonadales | unclassified    | unclassified                |
| 61094 | 14131           | 14427   | 14182   | 13481     | 13068   | 13558   | 13489   | 13517  | Bacteria | Proteobacteria                                          | Alphaproteobacteria | Sphingomonadales | Sphingomonadales | unclassified    | unclassified                |
| 60741 | 8862            | 9615    | 8142    | 6934      | 11656   | 12505   | 12041   | 11932  | Bacteria | Proteobacteria                                          | Alphaproteobacteria | unclassified     | unclassified     | sfz             | unclassified                |
| 15566 | 10050           | 9352    | 8579    | 8127      | 12585   | 13134   | 12049   | 12282  | Bacteria | Proteobacteria                                          | Betaproteobacteria  | Burkholderiales  | Alcaligenaceae   | unclassified    | unclassified                |
| 10596 | 9905            | 10542   | 10164   | 8891      | 10166   | 10129   | 10976   | 10112  | Bacteria | Proteobacteria                                          | Betaproteobacteria  | Burkholderiales  | Aquabacteriaceae | Aquabacterium   | unclassified                |
| 10657 | 12276           | 11843   | 11331   | 10177     | 12635   | 12765   | 12620   | 12406  | Bacteria | Proteobacteria                                          | Betaproteobacteria  | Burkholderiales  | Aquabacteriaceae | Aquabacterium   | unclassified                |
| 10744 | 10204           | 6223    | 8039    | 6218      | 14178   | 12589   | 13124   | 12433  | Bacteria | Proteobacteria                                          | Betaproteobacteria  | Burkholderiales  | Aquabacteriaceae | Aquabacterium   | unclassified                |
| 10760 | 9870            | 10499   | 10283   | 8250      | 12342   | 12733   | 11845   | 11533  | Bacteria | Proteobacteria                                          | Betaproteobacteria  | Burkholderiales  | Aquabacteriaceae | Aquabacterium   | unclassified                |
| 10804 | 11521           | 12146   | 11997   | 11503     | 13821   | 13815   | 13657   | 13920  | Bacteria | Proteobacteria                                          | Betaproteobacteria  | Burkholderiales  | Aquabacteriaceae | Aquabacterium   | unclassified                |
| 10851 | 10934           | 11392   | 11782   | 9402      | 11958   | 12397   | 12033   | 11714  | Bacteria | Proteobacteria                                          | Betaproteobacteria  | Burkholderiales  | Aquabacteriaceae | Aquabacterium   | unclassified                |
| 10870 | 10044           | 9511    | 9467    | 8739      | 13439   | 12572   | 12642   | 12319  | Bacteria | Proteobacteria                                          | Betaproteobacteria  | Burkholderiales  | Aquabacteriaceae | Aquabacterium   | unclassified                |
| 10999 | 10997           | 11227   | 11186   | 8631      | 11770   | 12126   | 11467   | 11286  | Bacteria | Proteobacteria                                          | Betaproteobacteria  | Burkholderiales  | Aquabacteriaceae | Aquabacterium   | unclassified                |
| 11025 | 9773            | 10030   | 10210   | 8721      | 12090   | 12693   | 12282   | 12210  | Bacteria | Proteobacteria                                          | Betaproteobacteria  | Burkholderiales  | Aquabacteriaceae | Aquabacterium   | unclassified                |
| 11137 | 11843           | 12670   | 12472   | 11252     | 13745   | 13779   | 13635   | 13471  | Bacteria | Proteobacteria                                          | Betaproteobacteria  | Burkholderiales  | Aquabacteriaceae | Aquabacterium   | unclassified                |
| 11150 | 10555           | 11756   | 11506   | 10955     | 12918   | 13235   | 12923   | 13111  | Bacteria | Proteobacteria                                          | Betaproteobacteria  | Burkholderiales  | Aquabacteriaceae | Aquabacterium   | unclassified                |
| 11204 | 11478           | 12103   | 11165   | 9342      | 14278   | 13581   | 13854   | 13757  | Bacteria | Proteobacteria                                          | Betaproteobacteria  | Burkholderiales  | Aquabacteriaceae | Aquabacterium   | unclassified                |
| 11208 | 10602           | 11262   | 10883   | 8686      | 11589   | 12047   | 11094   | 11716  | Bacteria | Proteobacteria                                          | Betaproteobacteria  | Burkholderiales  | Aquabacteriaceae | Aquabacterium   | unclassified                |
| 11318 | 11257           | 11495   | 11157   | 10439     | 12939   | 13008   | 12488   | 12751  | Bacteria | Proteobacteria                                          | Betaproteobacteria  | Burkholderiales  | Aquabacteriaceae | Aquabacterium   | unclassified                |
| 11449 | 11345           | 11841   | 11645   | 11281     | 12960   | 12916   | 12969   | 13011  | Bacteria | Proteobacteria                                          | Betaproteobacteria  | Burkholderiales  | Aquabacteriaceae | Aquabacterium   | unclassified                |
| 11543 | 11029           | 10891   | 10607   | 9190      | 12179   | 12699   | 12126   | 12695  | Bacteria | Proteobacteria                                          | Betaproteobacteria  | Burkholderiales  | Aquabacteriaceae | Aquabacterium   | unclassified                |
| 11612 | 12224           | 12528   | 12828   | 10853     | 12056   | 12886   | 12635   | 12558  | Bacteria | Proteobacteria                                          | Betaproteobacteria  | Burkholderiales  | Aquabacteriaceae | Aquabacterium   | unclassified                |
| 11636 | 10950           | 10654   | 10847   | 10541     | 12522   | 12383   | 12534   | 12890  | Bacteria | Proteobacteria                                          | Betaproteobacteria  | Burkholderiales  | Aquabacteriaceae | Aquabacterium   | unclassified                |
| 11657 | 11515           | 11894   | 11410   | 9988      | 12724   | 13021   | 12706   | 13230  | Bacteria | Proteobacteria                                          | Betaproteobacteria  | Burkholderiales  | Aquabacteriaceae | Aquabacterium   | unclassified                |
| 11724 | 11651           | 12194   | 12006   | 11064     | 12103   | 12904   | 12931   | 12715  | Bacteria | Proteobacteria                                          | Betaproteobacteria  | Burkholderiales  | Aquabacteriaceae | Aquabacterium   | unclassified                |
| 11745 | 12200           | 12336   | 12263   | 11725     | 13585   | 13410   | 13034   | 13066  | Bacteria | Proteobacteria                                          | Betaproteobacteria  | Burkholderiales  | Aquabacteriaceae | Aquabacterium   | unclassified                |
| 11757 | 13217           | 13437   | 13103   | 12051     | 12753   | 12837   | 13013   | 12903  | Bacteria | Proteobacteria                                          | Betaproteobacteria  | Burkholderiales  | Aquabacteriaceae | Aquabacterium   | unclassified                |
| 11853 | 12849           | 13464   | 13156   | 12309     | 14280   | 14241   |         |        |          |                                                         |                     |                  |                  |                 |                             |

Table S6 (part 5): Hy5Scores of OTUs that were called present in at least one of the samples. Taxonomic classifications are based on PhylChip taxonomy (derived from GreenGenes). Please note, that data presented here was rank normalized before performing statistical analyses presented in the manuscript.

| OTU   | Sample ID (PMA) |       |       |       |       | Sample ID |       |       |       |          | taxonomic classification of representative rOTU cluster |                    |                 |                  |                     |                     |
|-------|-----------------|-------|-------|-------|-------|-----------|-------|-------|-------|----------|---------------------------------------------------------|--------------------|-----------------|------------------|---------------------|---------------------|
|       | UR              | PMA   | CO    | PMA   | CRS   | UR        | CO    | CRS   | CRS   | kingdom  | phylum                                                  | class              | order           | family           | genus               | species             |
| 13093 | 10679           | 11132 | 11390 | 10172 | 14038 | 13572     | 12337 | 12923 | 12923 | Bacteria | Proteobacteria                                          | Betaproteobacteria | Burkholderiales | Aquabacteriaceae | Aquabacterium       | unclassified        |
| 13106 | 9780            | 10416 | 10286 | 8545  | 11712 | 12186     | 11517 | 11405 | 11405 | Bacteria | Proteobacteria                                          | Betaproteobacteria | Burkholderiales | Aquabacteriaceae | Aquabacterium       | unclassified        |
| 13162 | 11290           | 11677 | 11061 | 10061 | 13302 | 13521     | 13191 | 13540 | 13540 | Bacteria | Proteobacteria                                          | Betaproteobacteria | Burkholderiales | Aquabacteriaceae | Aquabacterium       | unclassified        |
| 13274 | 11147           | 10822 | 10875 | 9811  | 12284 | 12808     | 12256 | 12451 | 12451 | Bacteria | Proteobacteria                                          | Betaproteobacteria | Burkholderiales | Aquabacteriaceae | Aquabacterium       | unclassified        |
| 13362 | 9118            | 8838  | 8399  | 7324  | 10866 | 11753     | 10913 | 10906 | 10906 | Bacteria | Proteobacteria                                          | Betaproteobacteria | Burkholderiales | Aquabacteriaceae | Aquabacterium       | unclassified        |
| 13408 | 10861           | 11243 | 10654 | 9441  | 12465 | 13070     | 12739 | 13054 | 13054 | Bacteria | Proteobacteria                                          | Betaproteobacteria | Burkholderiales | Aquabacteriaceae | Aquabacterium       | unclassified        |
| 13402 | 11375           | 12552 | 12365 | 10823 | 12353 | 13360     | 13124 | 13007 | 13007 | Bacteria | Proteobacteria                                          | Betaproteobacteria | Burkholderiales | Aquabacteriaceae | Aquabacterium       | unclassified        |
| 13681 | 8524            | 8606  | 8330  | 7115  | 11119 | 12507     | 11532 | 12200 | 12200 | Bacteria | Proteobacteria                                          | Betaproteobacteria | Burkholderiales | Aquabacteriaceae | Aquabacterium       | unclassified        |
| 13763 | 11764           | 11895 | 12397 | 10917 | 11995 | 12541     | 12079 | 12221 | 12221 | Bacteria | Proteobacteria                                          | Betaproteobacteria | Burkholderiales | Aquabacteriaceae | Aquabacterium       | unclassified        |
| 13769 | 10851           | 11523 | 11294 | 10578 | 13434 | 12862     | 12881 | 12846 | 12846 | Bacteria | Proteobacteria                                          | Betaproteobacteria | Burkholderiales | Aquabacteriaceae | Aquabacterium       | unclassified        |
| 13882 | 11091           | 11659 | 11663 | 10412 | 12030 | 12174     | 11616 | 11566 | 11566 | Bacteria | Proteobacteria                                          | Betaproteobacteria | Burkholderiales | Aquabacteriaceae | Aquabacterium       | unclassified        |
| 13991 | 11895           | 12197 | 12247 | 12283 | 12202 | 12696     | 12708 | 12519 | 12519 | Bacteria | Proteobacteria                                          | Betaproteobacteria | Burkholderiales | Aquabacteriaceae | Aquabacterium       | unclassified        |
| 14055 | 11078           | 11532 | 11532 | 10428 | 12357 | 13027     | 12603 | 12803 | 12803 | Bacteria | Proteobacteria                                          | Betaproteobacteria | Burkholderiales | Aquabacteriaceae | Aquabacterium       | unclassified        |
| 14121 | 12871           | 13139 | 13597 | 12189 | 12292 | 12480     | 12523 | 12499 | 12499 | Bacteria | Proteobacteria                                          | Betaproteobacteria | Burkholderiales | Aquabacteriaceae | Aquabacterium       | unclassified        |
| 14137 | 10766           | 11378 | 11444 | 9305  | 12442 | 12926     | 12447 | 13181 | 13181 | Bacteria | Proteobacteria                                          | Betaproteobacteria | Burkholderiales | Aquabacteriaceae | Aquabacterium       | unclassified        |
| 14183 | 11037           | 11292 | 11260 | 11093 | 13096 | 13172     | 12913 | 13327 | 13327 | Bacteria | Proteobacteria                                          | Betaproteobacteria | Burkholderiales | Aquabacteriaceae | Aquabacterium       | unclassified        |
| 14194 | 11527           | 12055 | 12314 | 9935  | 12406 | 12894     | 12634 | 12807 | 12807 | Bacteria | Proteobacteria                                          | Betaproteobacteria | Burkholderiales | Aquabacteriaceae | Aquabacterium       | unclassified        |
| 14199 | 11341           | 11424 | 10370 | 10105 | 12650 | 12840     | 12301 | 13024 | 13024 | Bacteria | Proteobacteria                                          | Betaproteobacteria | Burkholderiales | Aquabacteriaceae | Aquabacterium       | unclassified        |
| 14292 | 11684           | 12095 | 12232 | 10404 | 11671 | 12474     | 11570 | 11588 | 11588 | Bacteria | Proteobacteria                                          | Betaproteobacteria | Burkholderiales | Aquabacteriaceae | Aquabacterium       | unclassified        |
| 15292 | 10770           | 11130 | 10444 | 8503  | 13212 | 13055     | 12519 | 12694 | 12694 | Bacteria | Proteobacteria                                          | Betaproteobacteria | Burkholderiales | Aquabacteriaceae | Burkholderia mallei | Burkholderia mallei |
| 14622 | 9142            | 10655 | 8658  | 8442  | 11122 | 12390     | 11135 | 11014 | 11014 | Bacteria | Proteobacteria                                          | Betaproteobacteria | Burkholderiales | Burkholderiaceae | Burkholderia        | unclassified        |
| 14477 | 10028           | 10235 | 9978  | 9382  | 12871 | 12741     | 12274 | 12257 | 12257 | Bacteria | Proteobacteria                                          | Betaproteobacteria | Burkholderiales | Burkholderiaceae | Pandoraea           | unclassified        |
| 14545 | 10855           | 11529 | 11418 | 9665  | 12233 | 12844     | 12124 | 12214 | 12214 | Bacteria | Proteobacteria                                          | Betaproteobacteria | Burkholderiales | Burkholderiaceae | Pandoraea           | unclassified        |
| 15621 | 8032            | 10390 | 6781  | 7092  | 9798  | 12073     | 9350  | 9362  | 9362  | Bacteria | Proteobacteria                                          | Betaproteobacteria | Burkholderiales | Burkholderiaceae | unclassified        | unclassified        |
| 17051 | 11852           | 12311 | 12222 | 11420 | 12867 | 12398     | 12166 | 11939 | 11939 | Bacteria | Proteobacteria                                          | Betaproteobacteria | Burkholderiales | Comamonadaceae   | Comamonas           | unclassified        |
| 8808  | 9887            | 10520 | 9724  | 8763  | 11905 | 11880     | 11601 | 11471 | 11471 | Bacteria | Proteobacteria                                          | Betaproteobacteria | Burkholderiales | Comamonadaceae   | Deitria             | unclassified        |
| 10178 | 11339           | 11943 | 11315 | 13000 | 13212 | 13413     | 12571 | 12571 | 12571 | Bacteria | Proteobacteria                                          | Betaproteobacteria | Burkholderiales | Comamonadaceae   | Diaphrobacter       | unclassified        |
| 10400 | 10536           | 11048 | 10719 | 10249 | 12310 | 12920     | 12726 | 12561 | 12561 | Bacteria | Proteobacteria                                          | Betaproteobacteria | Burkholderiales | Comamonadaceae   | Diaphrobacter       | unclassified        |
| 10409 | 10975           | 11508 | 11273 | 10598 | 12169 | 12949     | 12246 | 12145 | 12145 | Bacteria | Proteobacteria                                          | Betaproteobacteria | Burkholderiales | Comamonadaceae   | Diaphrobacter       | unclassified        |
| 7690  | 11331           | 11916 | 11898 | 10510 | 11753 | 12630     | 12225 | 12221 | 12221 | Bacteria | Proteobacteria                                          | Betaproteobacteria | Burkholderiales | Comamonadaceae   | Diaphrobacter       | unclassified        |
| 7871  | 10334           | 11191 | 10906 | 9859  | 12775 | 12625     | 12339 | 12549 | 12549 | Bacteria | Proteobacteria                                          | Betaproteobacteria | Burkholderiales | Comamonadaceae   | Diaphrobacter       | unclassified        |
| 8038  | 10831           | 11871 | 10164 | 9275  | 13426 | 13324     | 12896 | 13008 | 13008 | Bacteria | Proteobacteria                                          | Betaproteobacteria | Burkholderiales | Comamonadaceae   | Diaphrobacter       | unclassified        |
| 8079  | 11914           | 12447 | 11526 | 11088 | 13475 | 13356     | 12653 | 13052 | 13052 | Bacteria | Proteobacteria                                          | Betaproteobacteria | Burkholderiales | Comamonadaceae   | Diaphrobacter       | unclassified        |
| 8071  | 12228           | 12991 | 12864 | 11861 | 13324 | 13457     | 13313 | 1371  | 1371  | Bacteria | Proteobacteria                                          | Betaproteobacteria | Burkholderiales | Comamonadaceae   | Diaphrobacter       | unclassified        |
| 8086  | 13681           | 13833 | 13699 | 13899 | 14079 | 14027     | 14018 | 12671 | 12671 | Bacteria | Proteobacteria                                          | Betaproteobacteria | Burkholderiales | Comamonadaceae   | Diaphrobacter       | unclassified        |
| 8217  | 12207           | 12738 | 12400 | 11536 | 12879 | 13162     | 12928 | 12893 | 12893 | Bacteria | Proteobacteria                                          | Betaproteobacteria | Burkholderiales | Comamonadaceae   | Diaphrobacter       | unclassified        |
| 8247  | 12449           | 12675 | 12590 | 11802 | 13419 | 13345     | 13453 | 13471 | 13471 | Bacteria | Proteobacteria                                          | Betaproteobacteria | Burkholderiales | Comamonadaceae   | Diaphrobacter       | unclassified        |
| 8249  | 8510            | 7363  | 7023  | 7032  | 12712 | 9990      | 8752  | 9499  | 9499  | Bacteria | Proteobacteria                                          | Betaproteobacteria | Burkholderiales | Comamonadaceae   | Diaphrobacter       | unclassified        |
| 8300  | 11457           | 12225 | 11806 | 10870 | 12581 | 13253     | 13178 | 13013 | 13013 | Bacteria | Proteobacteria                                          | Betaproteobacteria | Burkholderiales | Comamonadaceae   | Diaphrobacter       | unclassified        |
| 8316  | 10352           | 11131 | 10070 | 8899  | 13341 | 12966     | 12351 | 12507 | 12507 | Bacteria | Proteobacteria                                          | Betaproteobacteria | Burkholderiales | Comamonadaceae   | Diaphrobacter       | unclassified        |
| 8385  | 12422           | 13005 | 12424 | 11926 | 13763 | 13601     | 12717 | 13131 | 13131 | Bacteria | Proteobacteria                                          | Betaproteobacteria | Burkholderiales | Comamonadaceae   | Diaphrobacter       | unclassified        |
| 8437  | 10560           | 11184 | 9536  | 8627  | 13169 | 12923     | 12023 | 12417 | 12417 | Bacteria | Proteobacteria                                          | Betaproteobacteria | Burkholderiales | Comamonadaceae   | Diaphrobacter       | unclassified        |
| 8529  | 9611            | 10559 | 9819  | 7727  | 13273 | 12630     | 12536 | 12452 | 12452 | Bacteria | Proteobacteria                                          | Betaproteobacteria | Burkholderiales | Comamonadaceae   | Diaphrobacter       | unclassified        |
| 8546  | 11206           | 11761 | 11361 | 10521 | 12946 | 12935     | 12733 | 12521 | 12521 | Bacteria | Proteobacteria                                          | Betaproteobacteria | Burkholderiales | Comamonadaceae   | Diaphrobacter       | unclassified        |
| 8593  | 10669           | 10952 | 9599  | 9659  | 12006 | 12074     | 11565 | 11893 | 11893 | Bacteria | Proteobacteria                                          | Betaproteobacteria | Burkholderiales | Comamonadaceae   | Diaphrobacter       | unclassified        |
| 8663  | 9837            | 9323  | 9204  | 8709  | 12505 | 12180     | 11573 | 11692 | 11692 | Bacteria | Proteobacteria                                          | Betaproteobacteria | Burkholderiales | Comamonadaceae   | Diaphrobacter       | unclassified        |
| 8842  | 11890           | 11991 | 12167 | 12307 | 12725 | 12439     | 11994 | 12062 | 12062 | Bacteria | Proteobacteria                                          | Betaproteobacteria | Burkholderiales | Comamonadaceae   | Diaphrobacter       | unclassified        |
| 8845  | 11710           | 11981 | 10921 | 10872 | 12940 | 13258     | 12413 | 12395 | 12395 | Bacteria | Proteobacteria                                          | Betaproteobacteria | Burkholderiales | Comamonadaceae   | Diaphrobacter       | unclassified        |
| 8983  | 9989            | 10863 | 9102  | 8205  | 13070 | 12972     | 11840 | 12346 | 12346 | Bacteria | Proteobacteria                                          | Betaproteobacteria | Burkholderiales | Comamonadaceae   | Diaphrobacter       | unclassified        |
| 9182  | 10678           | 11636 | 9407  | 8922  | 13753 | 13358     | 12656 | 12961 | 12961 | Bacteria | Proteobacteria                                          | Betaproteobacteria | Burkholderiales | Comamonadaceae   | Diaphrobacter       | unclassified        |
| 9253  | 10819           | 11734 | 11742 | 9943  | 12017 | 12240     | 11752 | 11763 | 11763 | Bacteria | Proteobacteria                                          | Betaproteobacteria | Burkholderiales | Comamonadaceae   | Diaphrobacter       | unclassified        |
| 9380  | 9937            | 10699 | 8792  | 7966  | 13321 | 12967     | 12110 | 12526 | 12526 | Bacteria | Proteobacteria                                          | Betaproteobacteria | Burkholderiales | Comamonadaceae   | Diaphrobacter       | unclassified        |
| 9418  | 10628           | 10814 | 10510 | 9038  | 12868 | 13016     | 12686 | 12755 | 12755 | Bacteria | Proteobacteria                                          | Betaproteobacteria | Burkholderiales | Comamonadaceae   | Diaphrobacter       | unclassified        |
| 9474  | 11516           | 11932 | 11626 | 10289 | 13517 | 13475     | 13365 | 13810 | 13810 | Bacteria | Proteobacteria                                          | Betaproteobacteria | Burkholderiales | Comamonadaceae   | Diaphrobacter       | unclassified        |
| 9571  | 10035           | 10221 | 9677  | 7696  | 12980 | 13409     | 12947 | 12871 | 12871 | Bacteria | Proteobacteria                                          | Betaproteobacteria | Burkholderiales | Comamonadaceae   | Diaphrobacter       | unclassified        |
| 9579  | 10626           | 11467 | 11013 | 10387 | 12983 | 13439     | 12964 | 12963 | 12963 | Bacteria | Proteobacteria                                          | Betaproteobacteria | Burkholderiales | Comamonadaceae   | Diaphrobacter       | unclassified        |
| 9615  | 12440           | 12675 | 12633 | 11555 | 12851 | 12979     | 12942 | 12884 | 12884 | Bacteria | Proteobacteria                                          | Betaproteobacteria | Burkholderiales | Comamonadaceae   | Diaphrobacter       | unclassified        |
| 9623  | 9984            | 10725 | 9562  | 8446  | 12891 | 12772     | 11899 | 12160 | 12160 | Bacteria | Proteobacteria                                          | Betaproteobacteria | Burkholderiales | Comamonadaceae   | Diaphrobacter       | unclassified        |
| 9742  | 10133           | 11200 | 9549  | 8347  | 13245 | 12943     | 12152 | 12549 | 12549 | Bacteria | Proteobacteria                                          | Betaproteobacteria | Burkholderiales | Comamonadaceae   | Diaphrobacter       | unclassified        |
| 9872  | 12391           | 12948 | 12718 | 12350 | 12987 | 12633     | 12613 | 13193 | 13193 | Bacteria | Proteobacteria                                          | Betaproteobacteria | Burkholderiales | Comamonadaceae   | Diaphrobacter       | unclassified        |
| 9931  | 10036           | 10595 | 10938 | 9184  | 12580 | 12237     | 11634 | 12785 | 12785 | Bacteria | Proteobacteria                                          | Betaproteobacteria | Burkholderiales | Comamonadaceae   | Diaphrobacter       | unclassified        |
| 9938  | 14026           | 14221 | 14082 | 13524 | 14039 | 13989     | 12942 | 13811 | 13811 | Bacteria | Proteobacteria                                          | Betaproteobacteria | Burkholderiales | Comamonadaceae   | Diaphrobacter       | unclassified        |
| 9917  | 10139           | 10524 | 10470 | 9238  | 11007 | 11453     | 11769 | 11257 | 11257 | Bacteria | Proteobacteria                                          | Betaproteobacteria | Burkholderiales | Comamonadaceae   | Polaronas           | unclassified        |
| 9103  | 12200           | 11818 | 11400 | 9662  | 12764 | 12759     | 11857 | 11944 | 11944 | Bacteria | Proteobacteria                                          | Betaproteobacteria | Burkholderiales | Comamonadaceae   | Rhodofax            | unclassified        |
| 9232  | 12040           | 12659 | 12248 | 11325 | 11832 | 12743     | 12212 | 12206 | 12206 | Bacteria | Proteobacteria                                          | Betaproteobacteria | Burkholderiales | Comamonadaceae   | Rhodofax            | unclassified        |
| 9921  | 9711            | 9828  | 10101 | 9412  | 12107 | 12156     | 11458 | 12480 | 12480 | Bacteria | Proteobacteria                                          | Betaproteobacteria | Burkholderiales | Comamonadaceae   | Rhodofax            | unclassified        |
| 9359  | 9080            | 10002 | 8590  | 9720  | 9141  | 12169     | 8810  | 8992  | 8992  | Bacteria | Proteobacteria                                          | Betaproteobacteria | Burkholderiales | Comamonadaceae   | Simplicispira       | unclassified        |
| 10116 | 11354           | 12297 | 12059 | 12132 | 10860 | 12142     | 11716 | 11729 | 11729 | Bacteria | Proteobacteria                                          | Betaproteobacteria | Burkholderiales | Comamonadaceae   | unclassified        | unclassified        |
| 10362 | 11703           | 12197 | 12653 | 11001 | 11364 | 11437     | 11448 | 11246 | 11246 | Bacteria | Proteobacteria                                          | Betaproteobacteria | Burkholderiales | Comamonadaceae   | unclassified        | unclassified        |
| 15978 | 9609            | 8621  | 7974  | 7778  | 9958  | 11716     | 10314 | 10117 | 10117 | Bacteria | Proteobacteria                                          | Betaproteobacteria | Burkholderiales | Comamonadaceae   | unclassified        | unclassified        |
| 16384 | 11943           | 12412 | 12169 | 11581 | 12600 | 12538     | 12601 | 12506 | 12506 | Bacteria | Proteobacteria                                          | Betaproteobacteria | Burkholderiales | Comamonadaceae   | unclassified        | unclassified        |
| 7636  | 13350           | 13592 | 13613 | 12253 | 11988 | 12382     | 12962 | 12816 | 12816 | Bacteria | Proteobacteria                                          | Betaproteobacteria | Burkholderiales | Comamonadaceae   | unclassified        | unclassified        |
| 7682  | 12641           | 13023 | 12870 | 12384 | 13179 | 13311     | 13399 | 13393 | 13393 | Bacteria | Proteobacteria                                          | Betaproteobacteria | Burkholderiales | Comamonadaceae   | unclassified        | unclassified        |
| 7917  | 9651            | 9847  | 9864  | 8768  | 10998 | 1221      |       |       |       |          |                                                         |                    |                 |                  |                     |                     |



Table S6 (part U): HybScores of OTUs that were called present in at least one of the samples. Taxonomic classifications are based on PhyloChip taxonomy (derived from GreenGenes). Please note, that data presented here was rank normalized before performing statistical analyses presented in the manuscript.

| Sample ID (PMA) |        |        |         |         | Sample ID |       |       |       | taxonomic classification of representative rOTU cluster |                 |                     |                    |                         |                   |                        |
|-----------------|--------|--------|---------|---------|-----------|-------|-------|-------|---------------------------------------------------------|-----------------|---------------------|--------------------|-------------------------|-------------------|------------------------|
| OTU             | UR_PMA | CO_PMA | CR8_PMA | CR5_PMA | UR        | CO    | CR8   | CR5   | kingdom                                                 | phylum          | class               | order              | family                  | genus             | species                |
| 3736            | 8177   | 6446   | 6249    | 6863    | 9897      | 8367  | 11591 | 11651 | Bacteria                                                | Proteobacteria  | Gammaproteobacteria | Pseudomonadales    | Pseudomonadaceae        | Pseudomonas       | unclassified           |
| 421             | 8625   | 7213   | 6303    | 6956    | 11633     | 10870 | 11533 | 11945 | Bacteria                                                | Proteobacteria  | Gammaproteobacteria | Pseudomonadales    | Pseudomonadaceae        | Pseudomonas       | unclassified           |
| 507             | 9804   | 10810  | 10056   | 10030   | 11551     | 12269 | 11848 | 11881 | Bacteria                                                | Proteobacteria  | Gammaproteobacteria | Pseudomonadales    | Pseudomonadaceae        | Pseudomonas       | unclassified           |
| 508             | 8397   | 7930   | 7315    | 7692    | 11755     | 12432 | 11912 | 12264 | Bacteria                                                | Proteobacteria  | Gammaproteobacteria | Pseudomonadales    | Pseudomonadaceae        | Pseudomonas       | unclassified           |
| 841             | 10540  | 11070  | 10859   | 10050   | 11491     | 11860 | 11549 | 11586 | Bacteria                                                | Proteobacteria  | Gammaproteobacteria | Pseudomonadales    | Pseudomonadaceae        | Pseudomonas       | unclassified           |
| 17392           | 7648   | 10442  | 7464    | 6524    | 9849      | 13006 | 9630  | 9488  | Bacteria                                                | Proteobacteria  | Gammaproteobacteria | Xanthomonadales    | Xanthomonadaceae        | Dokdonella        | unclassified           |
| 17015           | 9650   | 10205  | 9190    | 10461   | 11625     | 13136 | 12326 | 11826 | Bacteria                                                | Proteobacteria  | Gammaproteobacteria | Xanthomonadales    | Xanthomonadaceae        | Dyella            | unclassified           |
| 16349           | 10693  | 11025  | 11325   | 10885   | 12076     | 12525 | 11829 | 12418 | Bacteria                                                | Proteobacteria  | Gammaproteobacteria | Xanthomonadales    | Xanthomonadaceae        | Luteimonas        | Luteimonas mephitis    |
| 16030           | 8890   | 11006  | 9190    | 7456    | 11629     | 12267 | 10962 | 11899 | Bacteria                                                | Proteobacteria  | Gammaproteobacteria | Xanthomonadales    | Xanthomonadaceae        | Lysobacter        | unclassified           |
| 16221           | 8674   | 8071   | 6980    | 6521    | 11106     | 12675 | 11075 | 12651 | Bacteria                                                | Proteobacteria  | Gammaproteobacteria | Xanthomonadales    | Xanthomonadaceae        | Lysobacter        | unclassified           |
| 16495           | 8084   | 6534   | 6139    | 6560    | 9728      | 12702 | 10986 | 11828 | Bacteria                                                | Proteobacteria  | Gammaproteobacteria | Xanthomonadales    | Xanthomonadaceae        | Lysobacter        | unclassified           |
| 16734           | 9420   | 10124  | 7876    | 7422    | 11811     | 12643 | 10859 | 10886 | Bacteria                                                | Proteobacteria  | Gammaproteobacteria | Xanthomonadales    | Xanthomonadaceae        | Lysobacter        | unclassified           |
| 16819           | 8498   | 11280  | 9031    | 6965    | 11852     | 12434 | 11601 | 11761 | Bacteria                                                | Proteobacteria  | Gammaproteobacteria | Xanthomonadales    | Xanthomonadaceae        | Lysobacter        | unclassified           |
| 16847           | 7979   | 8139   | 6248    | 6916    | 11844     | 12169 | 11069 | 11120 | Bacteria                                                | Proteobacteria  | Gammaproteobacteria | Xanthomonadales    | Xanthomonadaceae        | Lysobacter        | unclassified           |
| 15908           | 9023   | 8327   | 7446    | 7022    | 11656     | 10922 | 10353 | 10572 | Bacteria                                                | Proteobacteria  | Gammaproteobacteria | Xanthomonadales    | Xanthomonadaceae        | Pseudoxanthomonas | unclassified           |
| 15920           | 9721   | 10881  | 9926    | 8606    | 10405     | 12350 | 10356 | 10890 | Bacteria                                                | Proteobacteria  | Gammaproteobacteria | Xanthomonadales    | Xanthomonadaceae        | Rhodanobacter     | unclassified           |
| 16340           | 7903   | 9600   | 7348    | 6386    | 7982      | 12229 | 8734  | 8804  | Bacteria                                                | Proteobacteria  | Gammaproteobacteria | Xanthomonadales    | Xanthomonadaceae        | Rhodanobacter     | unclassified           |
| 16376           | 9165   | 9893   | 9140    | 8475    | 10715     | 12836 | 11798 | 11197 | Bacteria                                                | Proteobacteria  | Gammaproteobacteria | Xanthomonadales    | Xanthomonadaceae        | Rhodanobacter     | unclassified           |
| 17357           | 9078   | 7829   | 6791    | 6892    | 10471     | 12146 | 10387 | 10438 | Bacteria                                                | Proteobacteria  | Gammaproteobacteria | Xanthomonadales    | Xanthomonadaceae        | Rhodanobacter     | unclassified           |
| 16520           | 8643   | 7353   | 7025    | 7360    | 12313     | 10179 | 9476  | 9734  | Bacteria                                                | Proteobacteria  | Gammaproteobacteria | Xanthomonadales    | Xanthomonadaceae        | Stenotrophomonas  | Pseudomonas geniculata |
| 16522           | 7988   | 6786   | 6188    | 6948    | 12324     | 9966  | 9488  | 9829  | Bacteria                                                | Proteobacteria  | Gammaproteobacteria | Xanthomonadales    | Xanthomonadaceae        | Stenotrophomonas  | Pseudomonas geniculata |
| 16590           | 8595   | 7435   | 6607    | 7503    | 12709     | 10976 | 10225 | 10344 | Bacteria                                                | Proteobacteria  | Gammaproteobacteria | Xanthomonadales    | Xanthomonadaceae        | Stenotrophomonas  | Pseudomonas geniculata |
| 17322           | 8758   | 7749   | 6979    | 7557    | 12943     | 11484 | 10841 | 10926 | Bacteria                                                | Proteobacteria  | Gammaproteobacteria | Xanthomonadales    | Xanthomonadaceae        | Stenotrophomonas  | Pseudomonas geniculata |
| 15941           | 9950   | 8875   | 6848    | 7352    | 12165     | 10910 | 9525  | 10376 | Bacteria                                                | Proteobacteria  | Gammaproteobacteria | Xanthomonadales    | Xanthomonadaceae        | Stenotrophomonas  | unclassified           |
| 16250           | 8975   | 8547   | 7457    | 7588    | 12327     | 11286 | 10611 | 10549 | Bacteria                                                | Proteobacteria  | Gammaproteobacteria | Xanthomonadales    | Xanthomonadaceae        | Stenotrophomonas  | unclassified           |
| 16971           | 9227   | 7776   | 7300    | 7556    | 12652     | 11036 | 11306 | 10826 | Bacteria                                                | Proteobacteria  | Gammaproteobacteria | Xanthomonadales    | Xanthomonadaceae        | Stenotrophomonas  | unclassified           |
| 17229           | 10464  | 10353  | 9555    | 9142    | 13395     | 12951 | 12531 | 12324 | Bacteria                                                | Proteobacteria  | Gammaproteobacteria | Xanthomonadales    | Xanthomonadaceae        | Stenotrophomonas  | unclassified           |
| 15917           | 8274   | 10320  | 7969    | 7137    | 11074     | 12449 | 10118 | 10341 | Bacteria                                                | Proteobacteria  | Gammaproteobacteria | Xanthomonadales    | Xanthomonadaceae        | Thermomonas       | unclassified           |
| 15987           | 9476   | 10661  | 7156    | 8170    | 11145     | 12425 | 10636 | 11888 | Bacteria                                                | Proteobacteria  | Gammaproteobacteria | Xanthomonadales    | Xanthomonadaceae        | Thermomonas       | unclassified           |
| 16000           | 11443  | 12265  | 11958   | 10414   | 13021     | 12983 | 12480 | 12314 | Bacteria                                                | Proteobacteria  | Gammaproteobacteria | Xanthomonadales    | Xanthomonadaceae        | unclassified      | unclassified           |
| 16096           | 8145   | 8279   | 7049    | 6547    | 12437     | 11641 | 11204 | 11123 | Bacteria                                                | Proteobacteria  | Gammaproteobacteria | Xanthomonadales    | Xanthomonadaceae        | unclassified      | unclassified           |
| 16717           | 8467   | 10029  | 7737    | 6835    | 12149     | 12491 | 11539 | 11382 | Bacteria                                                | Proteobacteria  | Gammaproteobacteria | Xanthomonadales    | Xanthomonadaceae        | unclassified      | unclassified           |
| 16161           | 9457   | 9254   | 6953    | 7785    | 12369     | 12379 | 10799 | 11558 | Bacteria                                                | Proteobacteria  | Gammaproteobacteria | Xanthomonadales    | Xanthomonadaceae        | Xanthomonas       | Xanthomonas axonopodis |
| 16425           | 8691   | 9090   | 6903    | 7770    | 12209     | 12382 | 10755 | 11467 | Bacteria                                                | Proteobacteria  | Gammaproteobacteria | Xanthomonadales    | Xanthomonadaceae        | Xanthomonas       | Xanthomonas axonopodis |
| 16916           | 9059   | 9219   | 7052    | 7622    | 12393     | 12113 | 10948 | 11536 | Bacteria                                                | Proteobacteria  | Gammaproteobacteria | Xanthomonadales    | Xanthomonadaceae        | Xanthomonas       | Xanthomonas axonopodis |
| 17348           | 9049   | 8512   | 6733    | 7690    | 12006     | 11646 | 10185 | 11097 | Bacteria                                                | Proteobacteria  | Gammaproteobacteria | Xanthomonadales    | Xanthomonadaceae        | Xanthomonas       | Xanthomonas axonopodis |
| 54344           | 11499  | 12186  | 10845   | 10794   | 13610     | 13598 | 13474 | 13808 | Bacteria                                                | SAR406          | AB16                | Arctic968-7        | A714017                 | SHAGS37           | unclassified           |
| 54147           | 11069  | 11088  | 10452   | 9790    | 11704     | 12604 | 11931 | 12150 | Bacteria                                                | SAR406          | AB16                | SSW63Au            | SHAS460                 | unclassified      | unclassified           |
| 54684           | 11009  | 11219  | 11324   | 10167   | 12602     | 13027 | 12515 | 13169 | Bacteria                                                | SAR406          | AB16                | SSW63Au            | SHAS460                 | unclassified      | unclassified           |
| 54850           | 8702   | 8891   | 8303    | 7376    | 11731     | 12133 | 11717 | 11944 | Bacteria                                                | SAR406          | AB16                | ZA3648c            | AEGEAN_185              | unclassified      | unclassified           |
| 51571           | 7757   | 7134   | 6761    | 6984    | 10232     | 12088 | 11025 | 11416 | Bacteria                                                | SC4             | unclassified        | unclassified       | unclassified            | sFA               | unclassified           |
| 76572           | 9757   | 10833  | 9553    | 9413    | 12297     | 12997 | 12358 | 12395 | Bacteria                                                | Spirochaetes    | Spirochaetes        | Spirochaetales     | Spirochaetaceae         | Spirochaeta       | unclassified           |
| 71526           | 8607   | 8171   | 6523    | 7314    | 11217     | 11881 | 11337 | 11606 | Bacteria                                                | Spirochaetes    | WW1                 | PBS-18             | SHA-4                   | Zplanc13          | unclassified           |
| 54955           | 7996   | 8801   | 7279    | 7258    | 11213     | 12330 | 11850 | 11972 | Bacteria                                                | Synergistetes   | Synergistia         | Synergistales      | Dethiosulfovibrionaceae | HA73              | unclassified           |
| 71623           | 8314   | 8759   | 6438    | 6704    | 10270     | 11738 | 10787 | 11050 | Bacteria                                                | Tenericutes     | Erysipelotrichi     | Erysipelotrichales | Erysipelotrichaceae     | PSB-M-3           | unclassified           |
| 70828           | 11476  | 11793  | 11435   | 11032   | 13439     | 13297 | 13413 | 14144 | Bacteria                                                | Tenericutes     | Mollicutes          | Entomoplasmatales  | Spiroplasmataceae       | Spiroplasma       | unclassified           |
| 71411           | 9425   | 9766   | 8698    | 8180    | 12644     | 12607 | 12388 | 12799 | Bacteria                                                | Tenericutes     | Mollicutes          | RF39               | unclassified            | sFA               | unclassified           |
| 71601           | 8636   | 9563   | 8344    | 7874    | 11522     | 12271 | 11769 | 12122 | Bacteria                                                | Tenericutes     | Mollicutes          | RF39               | unclassified            | sFA               | unclassified           |
| 53679           | 8522   | 7750   | 7076    | 7152    | 10822     | 12325 | 11072 | 12312 | Bacteria                                                | Thermi          | Deinococci          | Deinococcales      | Deinococcaceae          | Deinococcus       | unclassified           |
| 53750           | 8571   | 8721   | 8002    | 6772    | 12423     | 13202 | 12521 | 12720 | Bacteria                                                | Thermi          | Deinococci          | Deinococcales      | Deinococcaceae          | Deinococcus       | unclassified           |
| 53827           | 9134   | 9619   | 8253    | 7898    | 12534     | 13152 | 12074 | 12907 | Bacteria                                                | Thermi          | Deinococci          | Deinococcales      | Deinococcaceae          | Deinococcus       | unclassified           |
| 55906           | 7646   | 6323   | 5699    | 6560    | 10597     | 10400 | 11537 | 11066 | Bacteria                                                | Verrucomicrobia | Opitutae            | Opitutales         | Opitutaceae             | unclassified      | unclassified           |
| 55241           | 9444   | 9801   | 8891    | 8642    | 11239     | 11804 | 11704 | 11664 | Bacteria                                                | Verrucomicrobia | Opitutae            | Puniceicoccales    | Puniceicoccaceae        | unclassified      | unclassified           |
| 55347           | 10478  | 11331  | 10079   | 9583    | 12601     | 13077 | 12349 | 12407 | Bacteria                                                | Verrucomicrobia | Verrucomicrobiae    | Verrucomicrobiales | Verrucomicrobiaceae     | unclassified      | unclassified           |
| 56113           | 8531   | 8942   | 7399    | 7421    | 12043     | 13119 | 12114 | 12331 | Bacteria                                                | Verrucomicrobia | Verrucomicrobiae    | Verrucomicrobiales | Verrucomicrobiaceae     | unclassified      | unclassified           |
| 58667           | 8144   | 8199   | 6778    | 6966    | 10631     | 11886 | 10754 | 11626 | Bacteria                                                | WS3             | PRR-12              | CC106              | unclassified            | sFA               | unclassified           |
| 58579           | 11592  | 12208  | 9787    | 10836   | 11982     | 12807 | 11886 | 12286 | Bacteria                                                | WS3             | PRR-12              | GN03               | unclassified            | sFC               | unclassified           |
| 58597           | 8744   | 8672   | 6467    | 6909    | 11644     | 12406 | 11369 | 11605 | Bacteria                                                | WS3             | PRR-12              | GN03               | unclassified            | sFC               | unclassified           |
| 58646           | 8382   | 9601   | 6883    | 6833    | 11821     | 12482 | 11856 | 11901 | Bacteria                                                | WS3             | PRR-12              | GN03               | unclassified            | sFD               | unclassified           |

Table S7: Archaeal 454 pyrotag sequencing reads

| Sample ID and no. of reads |    |     |     |     | taxonomic classification of archaeal 16S rRNA gene amplicons |                 |                   |                    |                                          |
|----------------------------|----|-----|-----|-----|--------------------------------------------------------------|-----------------|-------------------|--------------------|------------------------------------------|
| OTU                        | UR | CO  | CR8 | CR5 | phylum                                                       | class           | order             | family             | genus                                    |
| 0                          | 0  | 3   | 0   | 0   | Euryarchaeota                                                | Methanomicrobia | Methanocellales   | Methanocellaceae   | Methanocella                             |
| 2                          | 34 | 0   | 0   | 0   | Euryarchaeota                                                | Halobacteria    | Halobacteriales   | Halobacteriaceae   | unclassified                             |
| 3                          | 0  | 0   | 6   | 0   | Euryarchaeota                                                | Halobacteria    | Halobacteriales   | Halobacteriaceae   | Halococcus                               |
| 12                         | 0  | 0   | 0   | 12  | Euryarchaeota                                                | Halobacteria    | Halobacteriales   | Halobacteriaceae   | Halococcus                               |
| 16                         | 0  | 15  | 1   | 14  | Euryarchaeota                                                | Halobacteria    | Halobacteriales   | Halobacteriaceae   | Halalkalicoccus                          |
| 17                         | 0  | 1   | 14  | 0   | Euryarchaeota                                                | Halobacteria    | Halobacteriales   | Halobacteriaceae   | Halococcus                               |
| 1                          | 0  | 1   | 0   | 0   | Thaumarchaeota                                               | Thaumarchaeota  | Nitrososphaerales | Nitrososphaeraceae | Candidatus Nitrososphaera (SCA1145)      |
| 4                          | 1  | 0   | 0   | 0   | Thaumarchaeota                                               | Thaumarchaeota  | Nitrososphaerales | Nitrososphaeraceae | Candidatus Nitrososphaera (SCA1170)      |
| 5                          | 79 | 120 | 3   | 40  | Thaumarchaeota                                               | Thaumarchaeota  | Nitrososphaerales | Nitrososphaeraceae | Candidatus Nitrososphaera (SCA1145)      |
| 6                          | 0  | 1   | 0   | 0   | Thaumarchaeota                                               | Thaumarchaeota  | Nitrososphaerales | Nitrososphaeraceae | Candidatus Nitrososphaera                |
| 7                          | 3  | 2   | 1   | 0   | Thaumarchaeota                                               | Thaumarchaeota  | Nitrososphaerales | Nitrososphaeraceae | Candidatus Nitrososphaera (SCA1170)      |
| 8                          | 0  | 3   | 0   | 0   | Thaumarchaeota                                               | Thaumarchaeota  | Nitrososphaerales | Nitrososphaeraceae | Candidatus Nitrososphaera (SCA1170)      |
| 9                          | 1  | 72  | 21  | 16  | Thaumarchaeota                                               | Thaumarchaeota  | Nitrososphaerales | Nitrososphaeraceae | Candidatus Nitrososphaera                |
| 10                         | 7  | 6   | 0   | 1   | Thaumarchaeota                                               | Thaumarchaeota  | Nitrososphaerales | Nitrososphaeraceae | Candidatus Nitrososphaera (SCA1145)      |
| 11                         | 0  | 1   | 0   | 0   | Thaumarchaeota                                               | Thaumarchaeota  | Nitrososphaerales | Nitrososphaeraceae | Candidatus Nitrososphaera (SCA1145)      |
| 13                         | 0  | 2   | 1   | 0   | Thaumarchaeota                                               | Thaumarchaeota  | Nitrososphaerales | Nitrososphaeraceae | Candidatus Nitrososphaera (SCA1145)      |
| 14                         | 0  | 1   | 0   | 0   | Thaumarchaeota                                               | Thaumarchaeota  | Nitrososphaerales | Nitrososphaeraceae | Candidatus Nitrososphaera                |
| 15                         | 0  | 1   | 0   | 0   | Thaumarchaeota                                               | Thaumarchaeota  | Nitrososphaerales | Nitrososphaeraceae | Candidatus Nitrososphaera (N. gargensis) |

Supplementary Fig. to Table S7: Assignment of picked archaeal OTUs to their phylogenetic groups. Proportions are shown in relative abundance [%]. Beside the family of Halobacteriaceae all other taxonomic ranks are resolved up to genus level. Colored boxes (from left to right) show their presence throughout sampled rooms (UR, CO, CR8 and CR5).

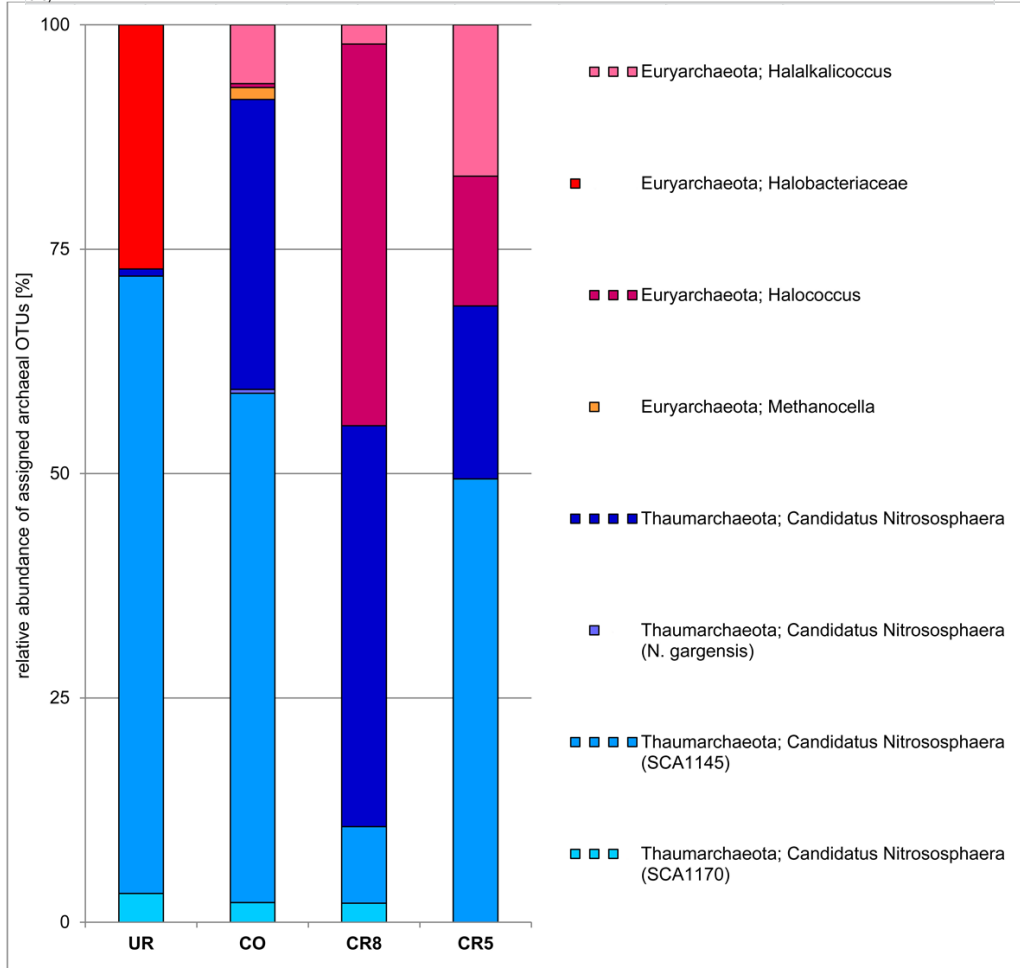

Table S8: Detected bacterial diversity in the extraction blank sample by 16S rRNA gene cloning (cOTUs), PhyloChip (rOTUs) and 454 pyrotag sequencing (pOTUs).

| cOTUs                  |                     |                     |                      |                   |
|------------------------|---------------------|---------------------|----------------------|-------------------|
| Acc. No./ OTU No.      | class               | order               | family               | genus             |
| 16S rRNA gene cloning  |                     |                     |                      |                   |
| JQ85568                | Actinobacteria      | Actinomycetales     | Brevibacteriaceae    | Brevibacterium    |
| JQ85515                | Bacilli             | Lactobacillales     | Carnobacteriaceae    | Trichococcus      |
| JQ85519                | Alphaproteobacteria | Rhizobiales         | Bradyrhizobiaceae    | Alfia             |
| JQ85562                | Alphaproteobacteria | Rhizobiales         | Phyllobacteriaceae   | unclassified      |
| JQ85523                | Alphaproteobacteria | Rhizobiales         | Xynthobacteraceae    | unclassified      |
| JQ85574                | Alphaproteobacteria | Sphingomonadales    | Sphingomonadaceae    | Sphingomonas      |
| JQ85516                | Alphaproteobacteria | Sphingomonadales    | Sphingomonadaceae    | Sphingomonas      |
| JQ85557                | Alphaproteobacteria | Rhodobacterales     | Rhodobacteraceae     | Rubellimicrobium  |
| JQ85508                | Betaproteobacteria  | Burkholderiales     | Comamonadaceae       | Variovorax        |
| JQ85524                | Betaproteobacteria  | Burkholderiales     | Comamonadaceae       | Variovorax        |
| PhyloChip              |                     |                     |                      |                   |
| rOTUs                  |                     |                     |                      |                   |
|                        | Actinobacteria      | Actinomycetales     | Corynebacteriaceae   | Corynebacterium   |
|                        | Actinobacteria      | Actinomycetales     | Corynebacteriaceae   | Corynebacterium   |
|                        | Actinobacteria      | Actinomycetales     | Corynebacteriaceae   | Corynebacterium   |
|                        | Actinobacteria      | Actinomycetales     | Corynebacteriaceae   | Corynebacterium   |
|                        | Actinobacteria      | Actinomycetales     | Corynebacteriaceae   | Corynebacterium   |
|                        | Actinobacteria      | Actinomycetales     | Corynebacteriaceae   | Corynebacterium   |
|                        | Actinobacteria      | Actinomycetales     | Corynebacteriaceae   | Corynebacterium   |
|                        | Actinobacteria      | Actinomycetales     | Corynebacteriaceae   | Corynebacterium   |
|                        | Actinobacteria      | Actinomycetales     | Corynebacteriaceae   | Corynebacterium   |
|                        | Alphaproteobacteria | Rhizobiales         | Rhizobiaceae         | Ochrobacterium    |
|                        | Alphaproteobacteria | Sphingomonadales    | Sphingomonadaceae    | Sphingomonas      |
|                        | Betaproteobacteria  | Burkholderiales     | Aquabacteriaceae     | Aquabacterium     |
|                        | Betaproteobacteria  | Burkholderiales     | Aquabacteriaceae     | Aquabacterium     |
|                        | Betaproteobacteria  | Burkholderiales     | Aquabacteriaceae     | Aquabacterium     |
|                        | Betaproteobacteria  | Burkholderiales     | Comamonadaceae       | Diaphorobacter    |
|                        | Betaproteobacteria  | Burkholderiales     | Comamonadaceae       | Diaphorobacter    |
|                        | Betaproteobacteria  | Burkholderiales     | Comamonadaceae       | Giesbergia        |
|                        | Betaproteobacteria  | Burkholderiales     | Comamonadaceae       | Simplicispira     |
|                        | Betaproteobacteria  | Burkholderiales     | Comamonadaceae       | unclassified      |
|                        | Deltaproteobacteria | Myxococcales        | Haliangiaceae        | unclassified      |
| 454 pyrotag sequencing |                     |                     |                      |                   |
| pOTUs                  |                     |                     |                      |                   |
|                        | Actinobacteria      | Actinomycetales     | Micrococcaceae       | Micrococcus       |
|                        | Actinobacteria      | Actinomycetales     | Micrococcaceae       | Arthrobacter      |
|                        | Actinobacteria      | Actinomycetales     | Nocardiaceae         | Rhodococcus       |
|                        | Actinobacteria      | Actinomycetales     | Propionibacteriaceae | Propionibacterium |
|                        | Actinobacteria      | Actinomycetales     | unclassified         | unclassified      |
|                        | Actinobacteria      | Solirubrobacterales | unclassified         | unclassified      |
|                        | Alphaproteobacteria | Caulobacterales     | Caulobacteraceae     | unclassified      |
|                        | Alphaproteobacteria | Rhizobiales         | Bradyrhizobiaceae    | Alfia             |
|                        | Alphaproteobacteria | Rhizobiales         | Methylobacteriaceae  | Methylobacterium  |
|                        | Alphaproteobacteria | Rhodobacterales     | Rhodobacteraceae     | Paracoccus        |
|                        | Alphaproteobacteria | Sphingomonadales    | Sphingomonadaceae    | Novosphingobium   |
|                        | Alphaproteobacteria | Sphingomonadales    | Sphingomonadaceae    | Sphingobium       |
|                        | Alphaproteobacteria | Sphingomonadales    | Sphingomonadaceae    | Sphingomonas      |
|                        | Anaerolineae        | Anaerolineales      | Anaerolineaceae      | DRC31             |
|                        | Bacilli             | Bacillales          | Paenibacillaceae     | unclassified      |
|                        | Bacilli             | Bacillales          | Staphylococcaceae    | Staphylococcus    |
|                        | Bacteroidia         | Bacteroidales       | Prevotellaceae       | Prevotella        |
|                        | Betaproteobacteria  | Burkholderiales     | Aquabacteriaceae     | Aquabacterium     |
|                        | Betaproteobacteria  | Burkholderiales     | Burkholderiaceae     | Burkholderia      |
|                        | Betaproteobacteria  | Burkholderiales     | Burkholderiaceae     | Pandoraea         |
|                        | Betaproteobacteria  | Burkholderiales     | Comamonadaceae       | Variovorax        |
|                        | Betaproteobacteria  | Burkholderiales     | Oxalobacteraceae     | Janthinobacterium |
|                        | Betaproteobacteria  | Burkholderiales     | Oxalobacteraceae     | Massilia          |
|                        | Betaproteobacteria  | Burkholderiales     | Burkholderiaceae     | Pandoraea         |
|                        | Betaproteobacteria  | Burkholderiales     | Burkholderiaceae     | Chitinomonas      |
|                        | Betaproteobacteria  | Methylophilales     | Methylophilaceae     | Methylothera      |
|                        | Betaproteobacteria  | Neisseriales        | Neisseriaceae        | Chromobacterium   |
|                        | Chloracidobacteria  | unclassified        | unclassified         | unclassified      |
|                        | Chloroplast         | Streptophyta        | unclassified         | unclassified      |
|                        | Flavobacteria       | Flavobacteriales    | Flavobacteriaceae    | Flavobacterium    |
|                        | Gammaproteobacteria | Chromatiales        | Sinobacteraceae      | Steroidobacterium |
|                        | Gammaproteobacteria | Enterobacteriales   | Enterobacteriaceae   | Yersinia          |
|                        | Gammaproteobacteria | Oceanospirillales   | Halomonadaceae       | Halomonas         |
|                        | Gammaproteobacteria | Pseudomonadales     | Moraxellaceae        | Acinetobacter     |
|                        | Gammaproteobacteria | Pseudomonadales     | Pseudomonadaceae     | Pseudomonas       |
|                        | Gammaproteobacteria | Xanthomonadales     | Xanthomonadaceae     | Pseudoxanthomonas |
|                        | Gammaproteobacteria | unclassified        | unclassified         | unclassified      |
|                        | Sphingobacteria     | Sphingobacteriales  | Rhodothermaceae      | unclassified      |
|                        | Synechococcus       | Pseudanabaenales    | Pseudanabaenaceae    | unclassified      |
|                        | Thermococcia        | unclassified        | unclassified         | unclassified      |

Table S9.1. real node table for pOTU network (based on pyrotagsequencing data) and visualization in Cytoscape

| node_name  | degree | weighted_degree | shared        |
|------------|--------|-----------------|---------------|
| denovo0    | 1      | 3               | CR8           |
| denovo1    | 1      | 2               | CR8           |
| denovo10   | 1      | 1               | CO            |
| denovo100  | 1      | 14              | CO            |
| denovo1000 | 2      | 4               | CR8,CR5       |
| denovo1001 | 2      | 2               | CO,CR5        |
| denovo1002 | 1      | 1               | CR8           |
| denovo1003 | 1      | 8               | CO            |
| denovo1004 | 1      | 1               | CO            |
| denovo1005 | 1      | 1               | CR5           |
| denovo1006 | 1      | 2               | CO            |
| denovo1007 | 1      | 1               | CO            |
| denovo1008 | 1      | 3               | CO            |
| denovo1009 | 2      | 2               | CO,CR8        |
| denovo101  | 1      | 1               | CR8           |
| denovo1010 | 1      | 1               | CO            |
| denovo1011 | 1      | 1               | CR8           |
| denovo1012 | 1      | 1               | CO            |
| denovo1013 | 2      | 8               | CO,CR5        |
| denovo1014 | 4      | 25              | CO,UR,CR8,CR5 |
| denovo1015 | 2      | 7               | UR,CR5        |
| denovo1016 | 2      | 2               | CO,CR8        |
| denovo1017 | 1      | 3               | CO            |
| denovo1018 | 3      | 25              | CO,CR8,CR5    |
| denovo1019 | 1      | 1               | CR5           |
| denovo102  | 1      | 1               | CO            |
| denovo1020 | 1      | 1               | CR5           |
| denovo1021 | 1      | 1               | CO            |
| denovo1023 | 1      | 7               | CO            |
| denovo1024 | 1      | 6               | CO            |
| denovo1025 | 1      | 10              | UR            |
| denovo1026 | 1      | 4               | CR8           |
| denovo1027 | 1      | 13              | CO            |
| denovo1028 | 1      | 1               | CR8           |
| denovo1029 | 1      | 1               | CR5           |
| denovo103  | 1      | 1               | CR5           |
| denovo1030 | 1      | 1               | CO            |
| denovo1031 | 1      | 1               | CR5           |
| denovo1032 | 1      | 1               | CO            |
| denovo1033 | 1      | 1               | CR8           |
| denovo1034 | 1      | 1               | CR5           |
| denovo1035 | 2      | 4               | CO,CR5        |
| denovo1036 | 1      | 1               | UR            |
| denovo1037 | 4      | 11              | CO,UR,CR8,CR5 |
| denovo1038 | 1      | 1               | UR            |
| denovo104  | 1      | 1               | CO            |
| denovo1040 | 2      | 4               | CO,CR5        |
| denovo1041 | 1      | 1               | UR            |
| denovo1042 | 1      | 2               | CO            |
| denovo1043 | 2      | 12              | UR,CR8        |
| denovo1044 | 3      | 8               | UR,CR8,CR5    |
| denovo1045 | 3      | 9               | UR,CR8,CR5    |
| denovo1046 | 1      | 14              | CO            |
| denovo1047 | 1      | 1               | CR5           |
| denovo1048 | 1      | 1               | CO            |
| denovo1049 | 1      | 1               | CR5           |
| denovo105  | 1      | 4               | CR5           |
| denovo1051 | 1      | 2               | CR8           |
| denovo1052 | 1      | 1               | CR5           |
| denovo1053 | 1      | 1               | CR5           |
| denovo1054 | 2      | 11              | CO,CR8        |
| denovo1055 | 1      | 1               | CO            |
| denovo1056 | 1      | 3               | CO            |

|            |   |    |               |
|------------|---|----|---------------|
| denovo1057 | 1 | 2  | CO            |
| denovo1058 | 1 | 1  | CO            |
| denovo1059 | 4 | 25 | CO,UR,CR8,CR5 |
| denovo106  | 2 | 7  | CO,CR5        |
| denovo1060 | 1 | 3  | CR5           |
| denovo1062 | 1 | 1  | UR            |
| denovo1063 | 1 | 3  | CO            |
| denovo1064 | 2 | 5  | CR8,CR5       |
| denovo1065 | 1 | 1  | CO            |
| denovo1066 | 1 | 1  | CO            |
| denovo1067 | 2 | 3  | CO,CR5        |
| denovo1068 | 1 | 2  | CR5           |
| denovo1069 | 1 | 1  | CR5           |
| denovo107  | 3 | 4  | CO,CR8,CR5    |
| denovo1070 | 1 | 1  | CR8           |
| denovo1071 | 1 | 5  | CR8           |
| denovo1072 | 1 | 1  | CO            |
| denovo1073 | 3 | 3  | CO,CR8,CR5    |
| denovo1074 | 1 | 1  | CR8           |
| denovo1075 | 1 | 1  | CO            |
| denovo1076 | 1 | 2  | CR8           |
| denovo1077 | 2 | 9  | CO,CR8        |
| denovo1078 | 1 | 2  | CO            |
| denovo1079 | 1 | 8  | CR5           |
| denovo108  | 1 | 1  | CR5           |
| denovo1080 | 1 | 5  | CO            |
| denovo1081 | 1 | 1  | CO            |
| denovo1082 | 1 | 2  | CR8           |
| denovo1083 | 1 | 4  | CO            |
| denovo1084 | 3 | 11 | CO,UR,CR5     |
| denovo1085 | 1 | 1  | CR8           |
| denovo1086 | 4 | 15 | CO,UR,CR8,CR5 |
| denovo1088 | 2 | 4  | CO,CR5        |
| denovo1089 | 1 | 1  | CR8           |
| denovo109  | 3 | 11 | CO,CR8,CR5    |
| denovo1090 | 2 | 7  | CR8,CR5       |
| denovo1091 | 1 | 1  | CO            |
| denovo1093 | 3 | 5  | CO,UR,CR5     |
| denovo1094 | 4 | 63 | CO,UR,CR8,CR5 |
| denovo1096 | 1 | 1  | CR5           |
| denovo1097 | 1 | 2  | UR            |
| denovo1098 | 1 | 1  | CO            |
| denovo1099 | 1 | 2  | CR5           |
| denovo11   | 1 | 1  | CO            |
| denovo110  | 1 | 1  | UR            |
| denovo1100 | 2 | 4  | CO,UR         |
| denovo1101 | 2 | 2  | CO,CR8        |
| denovo1102 | 1 | 1  | CO            |
| denovo1103 | 2 | 5  | CO,CR5        |
| denovo1104 | 1 | 1  | CR5           |
| denovo1105 | 1 | 1  | CR5           |
| denovo1107 | 1 | 1  | CR5           |
| denovo1108 | 2 | 3  | CR8,CR5       |
| denovo1109 | 1 | 83 | CO            |
| denovo111  | 1 | 1  | CO            |
| denovo1110 | 1 | 1  | CR8           |
| denovo1111 | 1 | 1  | CR5           |
| denovo1112 | 1 | 2  | CO            |
| denovo1113 | 1 | 1  | CO            |
| denovo1114 | 2 | 2  | CO,CR8        |
| denovo1115 | 1 | 2  | CR5           |
| denovo1116 | 1 | 1  | CR8           |
| denovo1117 | 1 | 1  | CR5           |
| denovo1118 | 1 | 1  | CO            |
| denovo1119 | 1 | 1  | CO            |
| denovo112  | 1 | 1  | CR5           |
| denovo1120 | 1 | 1  | CR8           |

|            |   |     |               |
|------------|---|-----|---------------|
| denovo1121 | 3 | 6   | CO,UR,CR5     |
| denovo1122 | 3 | 167 | CO,UR,CR5     |
| denovo1123 | 1 | 2   | CR8           |
| denovo1124 | 1 | 107 | CO            |
| denovo1125 | 1 | 1   | CR8           |
| denovo1127 | 1 | 1   | CR5           |
| denovo1128 | 1 | 1   | CR5           |
| denovo1129 | 1 | 1   | CR5           |
| denovo113  | 1 | 1   | UR            |
| denovo1130 | 1 | 1   | CR8           |
| denovo1131 | 2 | 3   | CO,CR8        |
| denovo1132 | 3 | 4   | CO,UR,CR8     |
| denovo1133 | 1 | 1   | CO            |
| denovo1134 | 1 | 2   | CO            |
| denovo1135 | 1 | 1   | CO            |
| denovo1136 | 1 | 1   | CO            |
| denovo1137 | 1 | 2   | CR8           |
| denovo1139 | 1 | 1   | CR8           |
| denovo114  | 3 | 8   | CO,CR8,CR5    |
| denovo1140 | 1 | 1   | CO            |
| denovo1141 | 1 | 1   | CR8           |
| denovo1142 | 1 | 2   | UR            |
| denovo1143 | 1 | 1   | CO            |
| denovo1144 | 1 | 1   | CO            |
| denovo1145 | 1 | 4   | CR8           |
| denovo1146 | 1 | 1   | CR8           |
| denovo1147 | 1 | 1   | CR8           |
| denovo1148 | 1 | 3   | CR8           |
| denovo1149 | 2 | 11  | CO,CR5        |
| denovo115  | 2 | 5   | CO,CR5        |
| denovo1150 | 3 | 9   | CO,CR8,CR5    |
| denovo1151 | 3 | 6   | CO,UR,CR5     |
| denovo1152 | 1 | 3   | CR5           |
| denovo1153 | 2 | 6   | CO,CR8        |
| denovo1154 | 2 | 3   | CO,CR5        |
| denovo1155 | 1 | 1   | CR8           |
| denovo1156 | 1 | 1   | CR5           |
| denovo1157 | 2 | 2   | CO,CR5        |
| denovo1158 | 1 | 1   | UR            |
| denovo1159 | 1 | 2   | CR5           |
| denovo116  | 2 | 3   | CR8,CR5       |
| denovo1160 | 1 | 1   | CR8           |
| denovo1161 | 3 | 7   | UR,CR8,CR5    |
| denovo1162 | 1 | 1   | CO            |
| denovo1164 | 1 | 2   | CO            |
| denovo1165 | 4 | 15  | CO,UR,CR8,CR5 |
| denovo1166 | 1 | 2   | CO            |
| denovo1167 | 1 | 2   | CR5           |
| denovo1168 | 1 | 2   | CO            |
| denovo1169 | 1 | 1   | CO            |
| denovo117  | 1 | 1   | UR            |
| denovo1170 | 2 | 2   | CO,CR8        |
| denovo1171 | 1 | 2   | CR8           |
| denovo1172 | 1 | 1   | CR8           |
| denovo1173 | 4 | 48  | CO,UR,CR8,CR5 |
| denovo1174 | 1 | 1   | CO            |
| denovo1175 | 1 | 2   | CO            |
| denovo1177 | 1 | 1   | CR5           |
| denovo1178 | 2 | 7   | CO,CR5        |
| denovo1179 | 1 | 4   | CO            |
| denovo118  | 1 | 1   | CO            |
| denovo1181 | 1 | 2   | CO            |
| denovo1182 | 1 | 1   | CO            |
| denovo1183 | 1 | 2   | CO            |
| denovo1184 | 3 | 11  | CO,UR,CR8     |
| denovo1185 | 1 | 1   | CR5           |
| denovo1186 | 1 | 1   | CR5           |

|            |   |    |               |
|------------|---|----|---------------|
| denovo1187 | 1 | 3  | CO            |
| denovo1188 | 1 | 1  | CR5           |
| denovo119  | 1 | 1  | CR8           |
| denovo1190 | 1 | 1  | UR            |
| denovo1191 | 1 | 1  | CR8           |
| denovo1192 | 1 | 1  | CR5           |
| denovo1193 | 2 | 2  | CO,UR         |
| denovo1194 | 1 | 2  | CO            |
| denovo1195 | 2 | 2  | CO,CR5        |
| denovo1196 | 1 | 1  | CR5           |
| denovo1197 | 1 | 5  | CO            |
| denovo1198 | 1 | 1  | CO            |
| denovo1199 | 2 | 2  | CO,CR8        |
| denovo12   | 1 | 1  | CO            |
| denovo1200 | 1 | 1  | CR8           |
| denovo1201 | 2 | 4  | CO,CR8        |
| denovo1202 | 4 | 52 | CO,UR,CR8,CR5 |
| denovo1203 | 2 | 3  | CO,UR         |
| denovo1205 | 1 | 1  | UR            |
| denovo1206 | 1 | 1  | CR8           |
| denovo1207 | 1 | 1  | CR8           |
| denovo1208 | 1 | 1  | CR5           |
| denovo1209 | 1 | 1  | CO            |
| denovo1210 | 1 | 2  | CR8           |
| denovo1211 | 1 | 3  | CO            |
| denovo1212 | 1 | 1  | UR            |
| denovo1215 | 1 | 1  | UR            |
| denovo1216 | 1 | 1  | CR8           |
| denovo1217 | 3 | 6  | CO,CR8,CR5    |
| denovo1218 | 1 | 2  | UR            |
| denovo1219 | 1 | 1  | CO            |
| denovo122  | 1 | 1  | CR5           |
| denovo1220 | 1 | 1  | UR            |
| denovo1221 | 1 | 1  | CO            |
| denovo1222 | 1 | 2  | CO            |
| denovo1223 | 1 | 1  | CR8           |
| denovo1224 | 1 | 1  | CO            |
| denovo1225 | 1 | 1  | CR8           |
| denovo1226 | 1 | 4  | CO            |
| denovo1227 | 3 | 6  | CO,CR8,CR5    |
| denovo1228 | 1 | 3  | UR            |
| denovo1229 | 1 | 1  | CO            |
| denovo123  | 1 | 2  | CR5           |
| denovo1230 | 3 | 5  | CO,UR,CR8     |
| denovo1231 | 3 | 12 | CO,CR8,CR5    |
| denovo1232 | 1 | 1  | CO            |
| denovo1233 | 1 | 1  | CR8           |
| denovo1234 | 1 | 2  | UR            |
| denovo1235 | 3 | 3  | CO,CR8,CR5    |
| denovo1236 | 3 | 5  | CO,CR8,CR5    |
| denovo1237 | 1 | 1  | CR8           |
| denovo1238 | 1 | 2  | CR8           |
| denovo1239 | 1 | 2  | CR5           |
| denovo124  | 1 | 1  | CR8           |
| denovo1241 | 1 | 2  | UR            |
| denovo1242 | 1 | 13 | CO            |
| denovo1243 | 1 | 11 | CO            |
| denovo1244 | 1 | 3  | CR5           |
| denovo1245 | 1 | 1  | CR5           |
| denovo1246 | 2 | 2  | CO,CR5        |
| denovo1247 | 1 | 1  | CR5           |
| denovo1248 | 2 | 5  | UR,CR8        |
| denovo125  | 1 | 1  | CO            |
| denovo1250 | 1 | 3  | UR            |
| denovo1251 | 1 | 1  | CO            |
| denovo1252 | 1 | 2  | CR5           |
| denovo1253 | 4 | 34 | CO,UR,CR8,CR5 |

|            |   |    |               |
|------------|---|----|---------------|
| denovo1254 | 1 | 2  | UR            |
| denovo1255 | 2 | 2  | CR8,CR5       |
| denovo1256 | 1 | 1  | CO            |
| denovo1257 | 4 | 44 | CO,UR,CR8,CR5 |
| denovo1258 | 1 | 2  | CR5           |
| denovo1259 | 1 | 4  | CO            |
| denovo126  | 2 | 4  | CO,CR8        |
| denovo1260 | 1 | 1  | CR8           |
| denovo1261 | 1 | 2  | CR5           |
| denovo1262 | 1 | 1  | CO            |
| denovo1263 | 1 | 3  | CO            |
| denovo1264 | 1 | 2  | CO            |
| denovo1265 | 1 | 2  | CR8           |
| denovo1266 | 1 | 1  | CO            |
| denovo1267 | 1 | 3  | CR8           |
| denovo1268 | 1 | 3  | CO            |
| denovo1269 | 1 | 1  | CR8           |
| denovo127  | 2 | 2  | CO,CR8        |
| denovo1270 | 1 | 1  | CR8           |
| denovo1271 | 1 | 3  | CR8           |
| denovo1272 | 1 | 1  | UR            |
| denovo1273 | 1 | 1  | CR5           |
| denovo1274 | 1 | 1  | CO            |
| denovo1276 | 1 | 1  | CR8           |
| denovo1277 | 3 | 8  | CO,CR8,CR5    |
| denovo1278 | 2 | 2  | CO,CR5        |
| denovo1279 | 3 | 7  | CO,CR8,CR5    |
| denovo128  | 1 | 2  | CO            |
| denovo1280 | 1 | 1  | CR8           |
| denovo1281 | 1 | 2  | CO            |
| denovo1282 | 1 | 1  | CR5           |
| denovo1283 | 1 | 2  | CO            |
| denovo1284 | 1 | 2  | UR            |
| denovo1285 | 1 | 2  | CO            |
| denovo1287 | 2 | 6  | CR8,CR5       |
| denovo1288 | 1 | 3  | CR8           |
| denovo1289 | 1 | 1  | CR5           |
| denovo129  | 1 | 1  | CO            |
| denovo1290 | 4 | 33 | CO,UR,CR8,CR5 |
| denovo1291 | 1 | 2  | CR5           |
| denovo1292 | 2 | 4  | CO,CR8        |
| denovo1293 | 2 | 3  | CO,CR8        |
| denovo1294 | 1 | 15 | CO            |
| denovo1295 | 1 | 1  | CR5           |
| denovo1297 | 1 | 1  | CO            |
| denovo1298 | 1 | 1  | UR            |
| denovo1299 | 1 | 1  | CO            |
| denovo13   | 1 | 4  | CR8           |
| denovo130  | 1 | 1  | CR8           |
| denovo1300 | 4 | 68 | CO,UR,CR8,CR5 |
| denovo1301 | 3 | 6  | UR,CR8,CR5    |
| denovo1302 | 1 | 2  | UR            |
| denovo1303 | 3 | 3  | CO,CR8,CR5    |
| denovo1304 | 1 | 1  | CO            |
| denovo1305 | 1 | 1  | CO            |
| denovo1306 | 1 | 1  | CR5           |
| denovo1307 | 1 | 8  | CO            |
| denovo1308 | 4 | 34 | CO,UR,CR8,CR5 |
| denovo1309 | 2 | 3  | CO,CR8        |
| denovo131  | 1 | 2  | CR5           |
| denovo1310 | 1 | 3  | CO            |
| denovo1311 | 3 | 15 | CO,UR,CR5     |
| denovo1312 | 1 | 1  | CR8           |
| denovo1313 | 2 | 2  | CO,CR5        |
| denovo1315 | 1 | 1  | CR5           |
| denovo1317 | 1 | 2  | CR8           |
| denovo1318 | 1 | 3  | CR8           |

|            |   |     |               |
|------------|---|-----|---------------|
| denovo1319 | 2 | 4   | CO,CR8        |
| denovo132  | 2 | 7   | CO,CR5        |
| denovo1320 | 1 | 1   | CO            |
| denovo1321 | 1 | 1   | CR5           |
| denovo1322 | 1 | 1   | CR8           |
| denovo1323 | 2 | 8   | CO,CR8        |
| denovo1324 | 3 | 6   | CO,CR8,CR5    |
| denovo1325 | 1 | 1   | CO            |
| denovo1326 | 1 | 2   | CO            |
| denovo1327 | 1 | 1   | CO            |
| denovo1328 | 1 | 3   | CR8           |
| denovo1329 | 2 | 2   | CR8,CR5       |
| denovo133  | 1 | 3   | CR8           |
| denovo1330 | 1 | 1   | CR5           |
| denovo1331 | 1 | 1   | CO            |
| denovo1332 | 1 | 1   | CO            |
| denovo1334 | 4 | 176 | CO,UR,CR8,CR5 |
| denovo1335 | 1 | 3   | CR8           |
| denovo1336 | 2 | 2   | CO,CR8        |
| denovo1337 | 1 | 1   | CO            |
| denovo1339 | 1 | 1   | CR5           |
| denovo134  | 4 | 77  | CO,UR,CR8,CR5 |
| denovo1341 | 4 | 24  | CO,UR,CR8,CR5 |
| denovo1342 | 2 | 2   | CO,CR8        |
| denovo1343 | 2 | 5   | CO,CR5        |
| denovo1344 | 1 | 1   | CO            |
| denovo1345 | 3 | 8   | CO,CR8,CR5    |
| denovo1346 | 4 | 62  | CO,UR,CR8,CR5 |
| denovo1347 | 3 | 5   | UR,CR8,CR5    |
| denovo1349 | 2 | 10  | CO,CR8        |
| denovo135  | 1 | 1   | CR8           |
| denovo1350 | 2 | 40  | UR,CR5        |
| denovo1351 | 2 | 5   | CO,CR5        |
| denovo1352 | 1 | 32  | CO            |
| denovo1353 | 1 | 2   | CO            |
| denovo1354 | 1 | 13  | CO            |
| denovo1355 | 1 | 1   | CO            |
| denovo1356 | 1 | 8   | CO            |
| denovo1357 | 2 | 3   | UR,CR8        |
| denovo1358 | 1 | 1   | CO            |
| denovo1359 | 1 | 1   | CO            |
| denovo136  | 1 | 1   | CR5           |
| denovo1360 | 1 | 1   | CO            |
| denovo1361 | 1 | 12  | CO            |
| denovo137  | 2 | 5   | CO,CR5        |
| denovo138  | 4 | 18  | CO,UR,CR8,CR5 |
| denovo14   | 1 | 1   | CO            |
| denovo140  | 1 | 1   | CR8           |
| denovo141  | 1 | 1   | CO            |
| denovo142  | 1 | 3   | CO            |
| denovo143  | 1 | 1   | CO            |
| denovo144  | 1 | 1   | CO            |
| denovo145  | 1 | 1   | CR5           |
| denovo147  | 1 | 3   | CO            |
| denovo148  | 2 | 2   | CO,CR8        |
| denovo149  | 3 | 4   | CO,UR,CR8     |
| denovo15   | 3 | 6   | CO,CR8,CR5    |
| denovo150  | 1 | 2   | CO            |
| denovo151  | 1 | 2   | CO            |
| denovo152  | 3 | 3   | CO,CR8,CR5    |
| denovo153  | 2 | 3   | CO,CR8        |
| denovo154  | 1 | 1   | CO            |
| denovo155  | 3 | 7   | CO,CR8,CR5    |
| denovo156  | 2 | 2   | CO,CR5        |
| denovo157  | 1 | 1   | CR8           |
| denovo158  | 2 | 4   | CO,CR5        |
| denovo159  | 2 | 11  | CO,UR         |

|           |   |     |               |
|-----------|---|-----|---------------|
| denovo160 | 1 | 1   | CR8           |
| denovo161 | 1 | 2   | CR8           |
| denovo162 | 1 | 2   | CR8           |
| denovo163 | 1 | 1   | CO            |
| denovo164 | 1 | 1   | CR8           |
| denovo165 | 2 | 2   | CO,CR5        |
| denovo166 | 1 | 2   | UR            |
| denovo167 | 1 | 1   | CO            |
| denovo168 | 1 | 2   | CR8           |
| denovo169 | 2 | 2   | CR8,CR5       |
| denovo17  | 1 | 1   | CR8           |
| denovo170 | 2 | 3   | CR8,CR5       |
| denovo172 | 1 | 1   | CO            |
| denovo173 | 1 | 4   | CO            |
| denovo174 | 2 | 2   | UR,CR5        |
| denovo175 | 1 | 1   | CR5           |
| denovo176 | 1 | 2   | CR8           |
| denovo177 | 1 | 31  | CO            |
| denovo178 | 4 | 10  | CO,UR,CR8,CR5 |
| denovo179 | 1 | 1   | CR8           |
| denovo18  | 3 | 10  | UR,CR8,CR5    |
| denovo180 | 2 | 2   | CR8,CR5       |
| denovo181 | 1 | 1   | CR5           |
| denovo182 | 1 | 1   | CR8           |
| denovo183 | 4 | 332 | CO,UR,CR8,CR5 |
| denovo184 | 4 | 43  | CO,UR,CR8,CR5 |
| denovo185 | 4 | 84  | CO,UR,CR8,CR5 |
| denovo186 | 2 | 4   | CR8,CR5       |
| denovo187 | 4 | 16  | CO,UR,CR8,CR5 |
| denovo189 | 1 | 1   | CR8           |
| denovo19  | 1 | 16  | CO            |
| denovo190 | 1 | 1   | CR5           |
| denovo191 | 1 | 2   | CR5           |
| denovo192 | 1 | 1   | CR8           |
| denovo193 | 4 | 9   | CO,UR,CR8,CR5 |
| denovo194 | 1 | 1   | CR5           |
| denovo195 | 1 | 2   | CR8           |
| denovo196 | 1 | 1   | CO            |
| denovo197 | 1 | 2   | CO            |
| denovo198 | 1 | 1   | CO            |
| denovo199 | 1 | 1   | UR            |
| denovo2   | 2 | 2   | CO,CR8        |
| denovo20  | 1 | 5   | CO            |
| denovo200 | 1 | 42  | CO            |
| denovo201 | 2 | 3   | UR,CR8        |
| denovo202 | 2 | 4   | CO,CR5        |
| denovo203 | 1 | 2   | CO            |
| denovo204 | 1 | 1   | CR5           |
| denovo205 | 1 | 1   | CO            |
| denovo206 | 1 | 1   | CR5           |
| denovo207 | 4 | 13  | CO,UR,CR8,CR5 |
| denovo208 | 1 | 1   | CR8           |
| denovo209 | 1 | 1   | CO            |
| denovo21  | 1 | 1   | CR5           |
| denovo210 | 4 | 13  | CO,UR,CR8,CR5 |
| denovo211 | 1 | 1   | CO            |
| denovo212 | 1 | 1   | CO            |
| denovo213 | 4 | 10  | CO,UR,CR8,CR5 |
| denovo214 | 1 | 1   | CR8           |
| denovo215 | 1 | 10  | CO            |
| denovo216 | 1 | 2   | CO            |
| denovo217 | 1 | 3   | CO            |
| denovo218 | 3 | 11  | CO,CR8,CR5    |
| denovo219 | 3 | 5   | CO,UR,CR5     |
| denovo22  | 1 | 1   | CO            |
| denovo221 | 1 | 3   | CR8           |
| denovo222 | 1 | 1   | CO            |

|           |   |     |               |
|-----------|---|-----|---------------|
| denovo223 | 1 | 2   | CO            |
| denovo224 | 1 | 1   | UR            |
| denovo225 | 1 | 3   | CR8           |
| denovo226 | 1 | 1   | CO            |
| denovo228 | 4 | 9   | CO,UR,CR8,CR5 |
| denovo229 | 2 | 8   | CO,CR8        |
| denovo23  | 2 | 2   | CO,CR5        |
| denovo231 | 1 | 1   | CR8           |
| denovo232 | 3 | 65  | UR,CR8,CR5    |
| denovo233 | 1 | 1   | CO            |
| denovo234 | 1 | 2   | CR8           |
| denovo235 | 1 | 5   | CO            |
| denovo236 | 3 | 7   | CO,CR8,CR5    |
| denovo237 | 1 | 115 | CO            |
| denovo239 | 1 | 3   | CO            |
| denovo24  | 1 | 1   | CR8           |
| denovo240 | 1 | 1   | CO            |
| denovo241 | 2 | 2   | CO,CR5        |
| denovo242 | 1 | 1   | CO            |
| denovo244 | 1 | 1   | UR            |
| denovo245 | 1 | 1   | UR            |
| denovo246 | 1 | 3   | CR5           |
| denovo247 | 1 | 1   | CR5           |
| denovo248 | 1 | 2   | CR8           |
| denovo249 | 1 | 1   | CR5           |
| denovo25  | 1 | 2   | CR5           |
| denovo250 | 1 | 3   | CO            |
| denovo251 | 1 | 2   | CO            |
| denovo252 | 2 | 8   | UR,CR5        |
| denovo253 | 1 | 2   | UR            |
| denovo254 | 1 | 2   | CR8           |
| denovo255 | 1 | 3   | CR8           |
| denovo256 | 1 | 1   | CO            |
| denovo258 | 1 | 1   | CO            |
| denovo259 | 1 | 1   | CO            |
| denovo26  | 1 | 1   | CO            |
| denovo261 | 1 | 1   | CR5           |
| denovo262 | 1 | 2   | CO            |
| denovo263 | 1 | 1   | CO            |
| denovo264 | 1 | 1   | CR8           |
| denovo265 | 1 | 3   | CO            |
| denovo266 | 2 | 6   | CO,UR         |
| denovo267 | 1 | 1   | UR            |
| denovo268 | 1 | 1   | CO            |
| denovo269 | 1 | 1   | CR5           |
| denovo27  | 1 | 1   | CR8           |
| denovo270 | 1 | 1   | CR8           |
| denovo271 | 1 | 1   | UR            |
| denovo272 | 3 | 18  | CO,CR8,CR5    |
| denovo273 | 1 | 2   | CR8           |
| denovo274 | 1 | 3   | CR5           |
| denovo275 | 1 | 1   | CR8           |
| denovo276 | 1 | 1   | CO            |
| denovo277 | 1 | 1   | CR8           |
| denovo279 | 1 | 1   | CO            |
| denovo28  | 1 | 1   | CO            |
| denovo280 | 1 | 2   | CO            |
| denovo281 | 1 | 3   | CR5           |
| denovo282 | 2 | 2   | UR,CR5        |
| denovo283 | 1 | 1   | CO            |
| denovo284 | 1 | 1   | CR5           |
| denovo285 | 1 | 1   | CR8           |
| denovo286 | 2 | 3   | CO,CR8        |
| denovo287 | 1 | 5   | CO            |
| denovo288 | 4 | 16  | CO,UR,CR8,CR5 |
| denovo289 | 1 | 3   | UR            |
| denovo29  | 1 | 1   | CR5           |

|           |   |    |               |
|-----------|---|----|---------------|
| denovo290 | 2 | 4  | CO,CR8        |
| denovo291 | 3 | 4  | CO,UR,CR8     |
| denovo292 | 1 | 1  | CR8           |
| denovo293 | 2 | 3  | CO,UR         |
| denovo294 | 3 | 3  | CO,UR,CR5     |
| denovo295 | 1 | 2  | CR8           |
| denovo296 | 3 | 15 | CO,CR8,CR5    |
| denovo297 | 1 | 1  | CR5           |
| denovo298 | 1 | 1  | CR8           |
| denovo299 | 1 | 1  | CR8           |
| denovo3   | 1 | 1  | CO            |
| denovo30  | 2 | 5  | CO,UR         |
| denovo301 | 1 | 2  | CO            |
| denovo302 | 1 | 1  | CO            |
| denovo303 | 1 | 1  | CR8           |
| denovo305 | 1 | 1  | CR8           |
| denovo306 | 1 | 3  | UR            |
| denovo308 | 1 | 1  | CO            |
| denovo309 | 1 | 1  | CO            |
| denovo31  | 1 | 1  | CR8           |
| denovo310 | 2 | 6  | CO,CR5        |
| denovo311 | 1 | 1  | CO            |
| denovo312 | 1 | 1  | CO            |
| denovo313 | 1 | 2  | CR8           |
| denovo314 | 2 | 5  | CO,CR8        |
| denovo315 | 2 | 13 | CO,CR8        |
| denovo316 | 1 | 1  | CR5           |
| denovo317 | 1 | 2  | CO            |
| denovo318 | 2 | 3  | CO,UR         |
| denovo319 | 2 | 4  | CO,CR8        |
| denovo32  | 1 | 1  | CO            |
| denovo320 | 1 | 3  | CO            |
| denovo321 | 1 | 2  | CR5           |
| denovo322 | 1 | 1  | UR            |
| denovo323 | 3 | 4  | CO,UR,CR8     |
| denovo324 | 2 | 8  | CO,CR8        |
| denovo325 | 2 | 5  | CR8,CR5       |
| denovo326 | 1 | 2  | CO            |
| denovo327 | 3 | 4  | CO,CR8,CR5    |
| denovo329 | 2 | 3  | CO,CR5        |
| denovo33  | 1 | 1  | CO            |
| denovo330 | 1 | 1  | CR5           |
| denovo331 | 1 | 2  | CR8           |
| denovo332 | 1 | 1  | CR8           |
| denovo333 | 1 | 2  | CR8           |
| denovo334 | 1 | 1  | CR8           |
| denovo335 | 3 | 7  | CO,CR8,CR5    |
| denovo336 | 1 | 1  | CO            |
| denovo337 | 1 | 4  | CR8           |
| denovo338 | 1 | 16 | CO            |
| denovo34  | 2 | 27 | CO,CR8        |
| denovo340 | 2 | 8  | CR8,CR5       |
| denovo343 | 1 | 3  | CO            |
| denovo344 | 1 | 2  | CO            |
| denovo345 | 1 | 1  | CR5           |
| denovo346 | 1 | 1  | CR5           |
| denovo347 | 2 | 2  | CO,CR5        |
| denovo348 | 1 | 1  | CR8           |
| denovo349 | 2 | 4  | CR8,CR5       |
| denovo35  | 1 | 12 | CR8           |
| denovo350 | 1 | 1  | CR5           |
| denovo352 | 1 | 1  | CO            |
| denovo353 | 4 | 71 | CO,UR,CR8,CR5 |
| denovo354 | 1 | 1  | CO            |
| denovo355 | 1 | 1  | CR5           |
| denovo356 | 1 | 1  | CO            |
| denovo357 | 2 | 7  | CR8,CR5       |

|           |   |    |               |
|-----------|---|----|---------------|
| denovo358 | 1 | 1  | CO            |
| denovo359 | 1 | 5  | CR8           |
| denovo36  | 1 | 1  | CO            |
| denovo360 | 1 | 3  | CR8           |
| denovo361 | 3 | 23 | CO,UR,CR8     |
| denovo362 | 1 | 1  | CR8           |
| denovo364 | 1 | 2  | CO            |
| denovo366 | 1 | 17 | CO            |
| denovo367 | 1 | 1  | CR8           |
| denovo368 | 1 | 1  | CO            |
| denovo369 | 1 | 2  | CO            |
| denovo37  | 1 | 1  | CR8           |
| denovo370 | 1 | 1  | CR5           |
| denovo371 | 2 | 2  | CO,CR5        |
| denovo372 | 1 | 2  | CO            |
| denovo373 | 1 | 1  | CO            |
| denovo374 | 2 | 7  | CO,UR         |
| denovo375 | 1 | 1  | CO            |
| denovo376 | 1 | 1  | CR5           |
| denovo377 | 3 | 5  | CO,CR8,CR5    |
| denovo378 | 1 | 2  | CR8           |
| denovo379 | 1 | 1  | CR8           |
| denovo38  | 1 | 9  | CR8           |
| denovo380 | 1 | 1  | CR8           |
| denovo381 | 1 | 1  | CR5           |
| denovo382 | 1 | 1  | CO            |
| denovo383 | 1 | 1  | CR5           |
| denovo384 | 2 | 7  | CO,CR8        |
| denovo385 | 1 | 3  | CR5           |
| denovo386 | 1 | 1  | CO            |
| denovo387 | 2 | 2  | CR8,CR5       |
| denovo388 | 1 | 3  | UR            |
| denovo389 | 2 | 3  | CO,CR8        |
| denovo390 | 3 | 9  | CO,CR8,CR5    |
| denovo391 | 1 | 1  | UR            |
| denovo392 | 1 | 1  | CO            |
| denovo393 | 4 | 47 | CO,UR,CR8,CR5 |
| denovo394 | 1 | 1  | CO            |
| denovo395 | 1 | 4  | CO            |
| denovo396 | 1 | 3  | CO            |
| denovo397 | 1 | 1  | CO            |
| denovo398 | 2 | 2  | CO,CR8        |
| denovo399 | 1 | 1  | CO            |
| denovo4   | 1 | 1  | CO            |
| denovo40  | 1 | 1  | UR            |
| denovo400 | 2 | 2  | CO,CR8        |
| denovo401 | 1 | 1  | CO            |
| denovo402 | 1 | 1  | CR5           |
| denovo403 | 1 | 12 | CR5           |
| denovo404 | 4 | 22 | CO,UR,CR8,CR5 |
| denovo405 | 1 | 1  | CO            |
| denovo406 | 1 | 1  | CO            |
| denovo407 | 1 | 4  | CR8           |
| denovo408 | 1 | 1  | CR5           |
| denovo409 | 2 | 4  | CO,CR5        |
| denovo41  | 1 | 1  | CO            |
| denovo410 | 1 | 4  | CR8           |
| denovo411 | 1 | 1  | CO            |
| denovo413 | 1 | 1  | CO            |
| denovo414 | 3 | 3  | CO,CR8,CR5    |
| denovo415 | 2 | 10 | CO,CR5        |
| denovo416 | 2 | 3  | CO,CR8        |
| denovo417 | 1 | 1  | CO            |
| denovo418 | 1 | 1  | CO            |
| denovo419 | 1 | 1  | CO            |
| denovo42  | 1 | 1  | CR8           |
| denovo420 | 1 | 1  | CR8           |

|           |   |    |            |
|-----------|---|----|------------|
| denovo421 | 1 | 5  | CR8        |
| denovo423 | 1 | 1  | CO         |
| denovo424 | 1 | 2  | CO         |
| denovo425 | 1 | 28 | CO         |
| denovo426 | 1 | 1  | CO         |
| denovo427 | 1 | 4  | CR5        |
| denovo428 | 1 | 1  | CO         |
| denovo429 | 2 | 2  | CO,UR      |
| denovo43  | 1 | 1  | UR         |
| denovo430 | 1 | 4  | CO         |
| denovo431 | 3 | 13 | CO,CR8,CR5 |
| denovo432 | 2 | 6  | CO,CR5     |
| denovo433 | 1 | 1  | CR8        |
| denovo434 | 2 | 2  | CO,CR8     |
| denovo435 | 1 | 1  | CO         |
| denovo436 | 1 | 1  | CR8        |
| denovo437 | 2 | 8  | CR8,CR5    |
| denovo438 | 1 | 1  | CR8        |
| denovo439 | 1 | 2  | UR         |
| denovo44  | 1 | 1  | CO         |
| denovo440 | 1 | 1  | CR5        |
| denovo441 | 2 | 2  | CO,CR5     |
| denovo442 | 1 | 1  | CO         |
| denovo443 | 3 | 4  | CO,UR,CR8  |
| denovo444 | 1 | 3  | CO         |
| denovo445 | 1 | 2  | CR8        |
| denovo446 | 2 | 4  | CR8,CR5    |
| denovo447 | 1 | 2  | CO         |
| denovo448 | 1 | 4  | CR5        |
| denovo449 | 1 | 1  | CR8        |
| denovo45  | 3 | 5  | CO,CR8,CR5 |
| denovo450 | 1 | 5  | CR8        |
| denovo451 | 1 | 13 | CO         |
| denovo452 | 1 | 1  | CO         |
| denovo454 | 3 | 5  | CO,UR,CR8  |
| denovo455 | 1 | 1  | CO         |
| denovo456 | 1 | 4  | CO         |
| denovo457 | 2 | 5  | CO,CR8     |
| denovo458 | 3 | 3  | CO,CR8,CR5 |
| denovo459 | 1 | 3  | CO         |
| denovo46  | 1 | 1  | CO         |
| denovo460 | 1 | 1  | CO         |
| denovo461 | 1 | 1  | CO         |
| denovo462 | 1 | 1  | CO         |
| denovo463 | 1 | 2  | CR8        |
| denovo464 | 1 | 3  | UR         |
| denovo466 | 1 | 1  | CO         |
| denovo468 | 1 | 2  | UR         |
| denovo469 | 1 | 1  | CO         |
| denovo470 | 2 | 2  | UR,CR5     |
| denovo471 | 3 | 6  | CO,CR8,CR5 |
| denovo472 | 1 | 1  | CR5        |
| denovo473 | 1 | 2  | CO         |
| denovo474 | 1 | 1  | CO         |
| denovo475 | 1 | 1  | CR8        |
| denovo476 | 1 | 1  | CR5        |
| denovo477 | 1 | 1  | CO         |
| denovo478 | 1 | 1  | CR5        |
| denovo479 | 1 | 1  | CO         |
| denovo48  | 1 | 1  | CR8        |
| denovo480 | 1 | 1  | CR5        |
| denovo481 | 1 | 1  | CR5        |
| denovo482 | 1 | 1  | UR         |
| denovo483 | 1 | 1  | CR8        |
| denovo484 | 1 | 1  | CR5        |
| denovo485 | 3 | 3  | UR,CR8,CR5 |
| denovo486 | 1 | 1  | CR5        |

|           |   |     |               |
|-----------|---|-----|---------------|
| denovo487 | 1 | 63  | CR5           |
| denovo488 | 1 | 7   | CR8           |
| denovo489 | 3 | 3   | UR,CR8,CR5    |
| denovo49  | 1 | 2   | CO            |
| denovo490 | 1 | 1   | CR8           |
| denovo491 | 1 | 4   | CO            |
| denovo492 | 4 | 176 | CO,UR,CR8,CR5 |
| denovo493 | 1 | 1   | CR8           |
| denovo494 | 2 | 2   | CR8,CR5       |
| denovo495 | 1 | 1   | CR5           |
| denovo496 | 1 | 1   | CO            |
| denovo497 | 1 | 1   | CO            |
| denovo498 | 3 | 10  | CO,CR8,CR5    |
| denovo499 | 1 | 1   | UR            |
| denovo5   | 2 | 6   | CO,CR5        |
| denovo50  | 1 | 1   | CO            |
| denovo500 | 1 | 7   | CR5           |
| denovo501 | 2 | 2   | CO,CR8        |
| denovo502 | 4 | 7   | CO,UR,CR8,CR5 |
| denovo504 | 2 | 2   | CO,CR5        |
| denovo505 | 1 | 1   | UR            |
| denovo506 | 1 | 1   | UR            |
| denovo508 | 2 | 2   | CO,CR8        |
| denovo509 | 1 | 1   | CR5           |
| denovo51  | 1 | 1   | CR5           |
| denovo510 | 1 | 1   | UR            |
| denovo511 | 2 | 11  | CR8,CR5       |
| denovo512 | 1 | 1   | CO            |
| denovo513 | 1 | 5   | CO            |
| denovo514 | 1 | 2   | UR            |
| denovo515 | 3 | 6   | CO,CR8,CR5    |
| denovo516 | 1 | 4   | CO            |
| denovo517 | 1 | 2   | CR5           |
| denovo518 | 1 | 1   | CR8           |
| denovo519 | 1 | 1   | CR8           |
| denovo52  | 1 | 1   | CO            |
| denovo520 | 3 | 4   | CO,UR,CR5     |
| denovo521 | 2 | 2   | CR8,CR5       |
| denovo522 | 1 | 1   | CO            |
| denovo524 | 2 | 3   | CO,UR         |
| denovo525 | 1 | 1   | CO            |
| denovo526 | 1 | 1   | CO            |
| denovo527 | 1 | 50  | CO            |
| denovo528 | 2 | 9   | CR8,CR5       |
| denovo529 | 1 | 1   | CO            |
| denovo53  | 1 | 1   | CO            |
| denovo530 | 4 | 22  | CO,UR,CR8,CR5 |
| denovo531 | 1 | 1   | CO            |
| denovo532 | 1 | 2   | CR8           |
| denovo533 | 1 | 1   | CO            |
| denovo534 | 1 | 2   | CR8           |
| denovo535 | 1 | 1   | CO            |
| denovo537 | 1 | 3   | CO            |
| denovo538 | 1 | 2   | CR8           |
| denovo54  | 1 | 1   | CR5           |
| denovo540 | 3 | 128 | CO,CR8,CR5    |
| denovo541 | 1 | 1   | CR8           |
| denovo542 | 4 | 208 | CO,UR,CR8,CR5 |
| denovo543 | 1 | 1   | CO            |
| denovo544 | 1 | 1   | CR8           |
| denovo545 | 1 | 1   | CR8           |
| denovo546 | 1 | 1   | CO            |
| denovo547 | 1 | 1   | CO            |
| denovo548 | 3 | 3   | CO,UR,CR8     |
| denovo550 | 1 | 1   | CR5           |
| denovo551 | 1 | 16  | CO            |
| denovo553 | 1 | 1   | CR5           |

|           |   |    |               |
|-----------|---|----|---------------|
| denovo554 | 1 | 1  | CO            |
| denovo555 | 2 | 3  | CR8,CR5       |
| denovo557 | 1 | 1  | CR8           |
| denovo559 | 1 | 1  | CR5           |
| denovo56  | 4 | 7  | CO,UR,CR8,CR5 |
| denovo560 | 1 | 1  | CO            |
| denovo561 | 1 | 3  | CR5           |
| denovo562 | 1 | 1  | CO            |
| denovo563 | 1 | 1  | CO            |
| denovo564 | 1 | 2  | CR8           |
| denovo565 | 1 | 1  | CR5           |
| denovo566 | 1 | 3  | CR5           |
| denovo567 | 1 | 1  | CR5           |
| denovo568 | 2 | 7  | UR,CR8        |
| denovo569 | 1 | 1  | CR5           |
| denovo57  | 3 | 4  | CO,UR,CR5     |
| denovo570 | 1 | 1  | CR5           |
| denovo571 | 1 | 1  | CO            |
| denovo572 | 1 | 1  | CR5           |
| denovo573 | 1 | 1  | CO            |
| denovo574 | 2 | 2  | CO,CR5        |
| denovo575 | 2 | 3  | CO,CR8        |
| denovo576 | 1 | 3  | CO            |
| denovo577 | 1 | 1  | CR8           |
| denovo578 | 1 | 1  | CR8           |
| denovo579 | 1 | 1  | CO            |
| denovo58  | 2 | 4  | CO,UR         |
| denovo580 | 1 | 1  | CO            |
| denovo581 | 1 | 1  | CO            |
| denovo582 | 1 | 2  | CO            |
| denovo583 | 1 | 24 | CO            |
| denovo584 | 2 | 4  | CO,CR8        |
| denovo585 | 1 | 1  | CO            |
| denovo586 | 2 | 3  | CO,CR5        |
| denovo587 | 2 | 2  | CO,CR5        |
| denovo588 | 1 | 1  | CR8           |
| denovo589 | 1 | 1  | CO            |
| denovo59  | 1 | 2  | CR5           |
| denovo591 | 1 | 1  | CR8           |
| denovo592 | 4 | 28 | CO,UR,CR8,CR5 |
| denovo593 | 2 | 6  | CO,CR8        |
| denovo594 | 2 | 2  | CR8,CR5       |
| denovo595 | 3 | 3  | UR,CR8,CR5    |
| denovo596 | 2 | 3  | CO,UR         |
| denovo597 | 1 | 1  | CO            |
| denovo598 | 1 | 6  | CO            |
| denovo599 | 1 | 1  | CR8           |
| denovo6   | 1 | 7  | CO            |
| denovo60  | 2 | 7  | CO,CR8        |
| denovo600 | 4 | 55 | CO,UR,CR8,CR5 |
| denovo601 | 2 | 2  | CR8,CR5       |
| denovo602 | 1 | 2  | CR8           |
| denovo603 | 1 | 1  | CR5           |
| denovo604 | 1 | 1  | CR5           |
| denovo605 | 4 | 22 | CO,UR,CR8,CR5 |
| denovo606 | 1 | 1  | CR8           |
| denovo607 | 2 | 4  | CO,CR5        |
| denovo608 | 1 | 1  | CR5           |
| denovo609 | 1 | 36 | CO            |
| denovo61  | 2 | 3  | UR,CR5        |
| denovo610 | 1 | 3  | CR5           |
| denovo611 | 1 | 1  | CO            |
| denovo612 | 1 | 1  | CR8           |
| denovo613 | 1 | 1  | CR5           |
| denovo614 | 1 | 1  | CO            |
| denovo615 | 1 | 1  | CO            |
| denovo616 | 2 | 2  | CR8,CR5       |

|           |   |     |               |
|-----------|---|-----|---------------|
| denovo617 | 1 | 2   | CO            |
| denovo618 | 2 | 5   | CR8,CR5       |
| denovo619 | 1 | 5   | CO            |
| denovo62  | 1 | 7   | CO            |
| denovo620 | 1 | 1   | CR5           |
| denovo621 | 2 | 4   | CO,CR5        |
| denovo622 | 1 | 2   | CR8           |
| denovo624 | 4 | 15  | CO,UR,CR8,CR5 |
| denovo625 | 1 | 1   | CO            |
| denovo626 | 2 | 5   | CO,UR         |
| denovo627 | 1 | 5   | CO            |
| denovo628 | 3 | 9   | CO,UR,CR8     |
| denovo629 | 1 | 2   | CO            |
| denovo63  | 4 | 78  | CO,UR,CR8,CR5 |
| denovo630 | 2 | 2   | UR,CR8        |
| denovo631 | 2 | 7   | UR,CR5        |
| denovo632 | 1 | 1   | UR            |
| denovo633 | 1 | 4   | UR            |
| denovo634 | 1 | 1   | CR8           |
| denovo635 | 1 | 1   | UR            |
| denovo636 | 1 | 2   | CR8           |
| denovo637 | 1 | 2   | CO            |
| denovo638 | 1 | 2   | CR8           |
| denovo639 | 4 | 7   | CO,UR,CR8,CR5 |
| denovo64  | 3 | 5   | CO,UR,CR5     |
| denovo640 | 2 | 2   | UR,CR5        |
| denovo641 | 2 | 3   | CO,CR8        |
| denovo642 | 1 | 1   | UR            |
| denovo643 | 1 | 1   | CO            |
| denovo644 | 1 | 1   | CR8           |
| denovo645 | 1 | 1   | CR8           |
| denovo646 | 1 | 1   | CR8           |
| denovo647 | 1 | 1   | CO            |
| denovo648 | 2 | 3   | CR8,CR5       |
| denovo649 | 1 | 1   | CO            |
| denovo65  | 3 | 11  | CO,UR,CR8     |
| denovo650 | 1 | 1   | CR8           |
| denovo651 | 2 | 2   | CR8,CR5       |
| denovo652 | 1 | 1   | CR8           |
| denovo653 | 1 | 1   | CO            |
| denovo654 | 2 | 7   | CO,CR5        |
| denovo655 | 4 | 107 | CO,UR,CR8,CR5 |
| denovo656 | 1 | 1   | CR5           |
| denovo657 | 3 | 12  | CO,CR8,CR5    |
| denovo658 | 2 | 3   | CO,CR5        |
| denovo66  | 1 | 6   | CR8           |
| denovo660 | 1 | 2   | CR8           |
| denovo661 | 4 | 14  | CO,UR,CR8,CR5 |
| denovo662 | 4 | 10  | CO,UR,CR8,CR5 |
| denovo663 | 2 | 6   | CO,CR8        |
| denovo664 | 1 | 1   | CR5           |
| denovo665 | 3 | 12  | CO,UR,CR8     |
| denovo666 | 3 | 6   | UR,CR8,CR5    |
| denovo667 | 4 | 6   | CO,UR,CR8,CR5 |
| denovo668 | 3 | 4   | CO,UR,CR5     |
| denovo669 | 1 | 1   | CR5           |
| denovo67  | 1 | 1   | CR5           |
| denovo672 | 1 | 1   | UR            |
| denovo673 | 1 | 1   | CR5           |
| denovo674 | 1 | 3   | CO            |
| denovo675 | 2 | 2   | CO,CR5        |
| denovo676 | 1 | 1   | CO            |
| denovo677 | 1 | 3   | CO            |
| denovo678 | 1 | 1   | CR5           |
| denovo679 | 3 | 5   | CO,CR8,CR5    |
| denovo68  | 1 | 1   | CO            |
| denovo680 | 1 | 1   | CO            |

|           |   |    |               |
|-----------|---|----|---------------|
| denovo681 | 1 | 8  | CO            |
| denovo683 | 1 | 2  | CO            |
| denovo684 | 1 | 1  | CO            |
| denovo685 | 1 | 1  | CO            |
| denovo686 | 1 | 1  | CO            |
| denovo687 | 1 | 2  | CR8           |
| denovo688 | 1 | 1  | CR5           |
| denovo689 | 1 | 4  | CR8           |
| denovo69  | 1 | 1  | CO            |
| denovo690 | 1 | 1  | CO            |
| denovo691 | 2 | 4  | CO,CR8        |
| denovo692 | 1 | 1  | CR8           |
| denovo693 | 2 | 3  | CR8,CR5       |
| denovo694 | 2 | 2  | CR8,CR5       |
| denovo695 | 1 | 2  | CR8           |
| denovo696 | 3 | 8  | CO,CR8,CR5    |
| denovo697 | 1 | 1  | CO            |
| denovo698 | 1 | 3  | CR5           |
| denovo699 | 4 | 55 | CO,UR,CR8,CR5 |
| denovo7   | 1 | 1  | CO            |
| denovo70  | 3 | 20 | CO,CR8,CR5    |
| denovo700 | 2 | 3  | UR,CR8        |
| denovo701 | 2 | 3  | CO,CR5        |
| denovo702 | 1 | 1  | CO            |
| denovo703 | 3 | 6  | CO,CR8,CR5    |
| denovo704 | 1 | 2  | CO            |
| denovo705 | 1 | 1  | CO            |
| denovo706 | 1 | 1  | CR5           |
| denovo707 | 1 | 1  | CO            |
| denovo708 | 1 | 17 | CO            |
| denovo709 | 4 | 39 | CO,UR,CR8,CR5 |
| denovo71  | 3 | 12 | CO,CR8,CR5    |
| denovo710 | 1 | 2  | UR            |
| denovo713 | 2 | 3  | UR,CR5        |
| denovo714 | 1 | 1  | CR5           |
| denovo715 | 1 | 2  | CR5           |
| denovo716 | 2 | 2  | CO,CR5        |
| denovo717 | 1 | 2  | CO            |
| denovo718 | 1 | 2  | CO            |
| denovo719 | 2 | 3  | CO,CR5        |
| denovo72  | 1 | 1  | CO            |
| denovo720 | 1 | 39 | CO            |
| denovo721 | 1 | 3  | CO            |
| denovo722 | 1 | 1  | CR8           |
| denovo723 | 1 | 1  | CR5           |
| denovo724 | 1 | 1  | CR5           |
| denovo725 | 2 | 5  | CR8,CR5       |
| denovo728 | 2 | 7  | CO,CR5        |
| denovo729 | 3 | 11 | CO,UR,CR8     |
| denovo73  | 2 | 2  | CO,CR5        |
| denovo730 | 1 | 1  | CO            |
| denovo731 | 1 | 1  | CR8           |
| denovo732 | 1 | 1  | CR5           |
| denovo733 | 2 | 6  | CO,UR         |
| denovo734 | 4 | 5  | CO,UR,CR8,CR5 |
| denovo735 | 1 | 2  | CO            |
| denovo736 | 1 | 1  | CR5           |
| denovo737 | 1 | 1  | CO            |
| denovo738 | 1 | 1  | CO            |
| denovo739 | 1 | 1  | CR5           |
| denovo74  | 3 | 13 | CO,CR8,CR5    |
| denovo740 | 2 | 4  | CO,CR5        |
| denovo742 | 2 | 2  | CR8,CR5       |
| denovo743 | 1 | 1  | CO            |
| denovo744 | 1 | 1  | CO            |
| denovo745 | 1 | 1  | CO            |
| denovo746 | 1 | 19 | CR5           |

|           |   |     |               |
|-----------|---|-----|---------------|
| denovo747 | 1 | 1   | CR5           |
| denovo748 | 4 | 23  | CO,UR,CR8,CR5 |
| denovo749 | 1 | 1   | CR5           |
| denovo75  | 3 | 11  | CO,UR,CR8     |
| denovo750 | 1 | 1   | CR5           |
| denovo752 | 1 | 1   | CR5           |
| denovo753 | 1 | 2   | CO            |
| denovo754 | 1 | 1   | CR8           |
| denovo755 | 2 | 3   | CO,CR8        |
| denovo756 | 1 | 2   | CR8           |
| denovo758 | 2 | 3   | CO,CR8        |
| denovo759 | 2 | 3   | CO,CR8        |
| denovo76  | 2 | 3   | CO,CR5        |
| denovo760 | 2 | 2   | UR,CR8        |
| denovo761 | 2 | 3   | CO,CR8        |
| denovo762 | 1 | 1   | CO            |
| denovo763 | 3 | 10  | CO,UR,CR5     |
| denovo765 | 1 | 1   | CO            |
| denovo766 | 3 | 7   | CO,CR8,CR5    |
| denovo767 | 2 | 3   | CR8,CR5       |
| denovo768 | 1 | 1   | CO            |
| denovo769 | 1 | 1   | CR5           |
| denovo77  | 1 | 1   | CR8           |
| denovo770 | 4 | 235 | CO,UR,CR8,CR5 |
| denovo771 | 3 | 5   | CO,CR8,CR5    |
| denovo772 | 1 | 1   | CO            |
| denovo773 | 1 | 1   | CR8           |
| denovo774 | 2 | 2   | CO,CR8        |
| denovo775 | 1 | 1   | CO            |
| denovo776 | 1 | 4   | CR5           |
| denovo777 | 3 | 12  | CO,UR,CR5     |
| denovo778 | 1 | 1   | UR            |
| denovo779 | 1 | 2   | CO            |
| denovo78  | 1 | 1   | CO            |
| denovo780 | 1 | 2   | CO            |
| denovo781 | 1 | 1   | CO            |
| denovo782 | 1 | 1   | CO            |
| denovo783 | 3 | 6   | CO,CR8,CR5    |
| denovo784 | 1 | 3   | CR8           |
| denovo785 | 1 | 30  | CO            |
| denovo786 | 3 | 20  | CO,CR8,CR5    |
| denovo787 | 2 | 3   | CO,CR8        |
| denovo788 | 1 | 1   | CO            |
| denovo789 | 1 | 2   | CR8           |
| denovo79  | 4 | 62  | CO,UR,CR8,CR5 |
| denovo790 | 3 | 13  | CO,CR8,CR5    |
| denovo791 | 1 | 28  | CO            |
| denovo792 | 1 | 7   | CO            |
| denovo794 | 1 | 1   | CO            |
| denovo795 | 2 | 17  | CO,CR8        |
| denovo796 | 3 | 9   | CO,CR8,CR5    |
| denovo797 | 1 | 1   | CR8           |
| denovo798 | 1 | 1   | UR            |
| denovo799 | 3 | 6   | CO,CR8,CR5    |
| denovo80  | 1 | 1   | CO            |
| denovo800 | 1 | 1   | CO            |
| denovo801 | 2 | 6   | CO,CR5        |
| denovo802 | 1 | 1   | CO            |
| denovo803 | 4 | 24  | CO,UR,CR8,CR5 |
| denovo804 | 1 | 1   | CO            |
| denovo805 | 1 | 1   | UR            |
| denovo806 | 3 | 15  | CO,CR8,CR5    |
| denovo807 | 4 | 18  | CO,UR,CR8,CR5 |
| denovo808 | 1 | 1   | UR            |
| denovo809 | 1 | 2   | CR5           |
| denovo81  | 2 | 4   | CR8,CR5       |
| denovo810 | 1 | 1   | CO            |

|           |   |    |               |
|-----------|---|----|---------------|
| denovo811 | 1 | 2  | CR8           |
| denovo812 | 1 | 65 | UR            |
| denovo813 | 1 | 1  | UR            |
| denovo815 | 1 | 1  | CO            |
| denovo816 | 2 | 4  | CO,CR5        |
| denovo817 | 1 | 2  | CO            |
| denovo818 | 2 | 5  | CR8,CR5       |
| denovo819 | 1 | 1  | CR8           |
| denovo82  | 1 | 2  | CO            |
| denovo820 | 1 | 1  | CR5           |
| denovo821 | 3 | 10 | CO,CR8,CR5    |
| denovo822 | 1 | 2  | CR5           |
| denovo823 | 1 | 1  | CR5           |
| denovo824 | 1 | 14 | CR8           |
| denovo825 | 1 | 1  | CR5           |
| denovo826 | 1 | 1  | CR5           |
| denovo827 | 1 | 1  | CO            |
| denovo828 | 1 | 2  | UR            |
| denovo829 | 4 | 41 | CO,UR,CR8,CR5 |
| denovo83  | 2 | 4  | UR,CR8        |
| denovo830 | 1 | 3  | CO            |
| denovo831 | 3 | 3  | CO,UR,CR8     |
| denovo832 | 1 | 2  | CR8           |
| denovo833 | 1 | 2  | CO            |
| denovo834 | 3 | 18 | CO,CR8,CR5    |
| denovo836 | 4 | 31 | CO,UR,CR8,CR5 |
| denovo837 | 1 | 1  | CO            |
| denovo838 | 2 | 2  | CO,UR         |
| denovo839 | 1 | 1  | CR5           |
| denovo84  | 1 | 2  | CR5           |
| denovo840 | 1 | 1  | UR            |
| denovo841 | 3 | 12 | CO,UR,CR5     |
| denovo842 | 1 | 1  | UR            |
| denovo843 | 1 | 1  | CR5           |
| denovo844 | 4 | 10 | CO,UR,CR8,CR5 |
| denovo845 | 1 | 13 | UR            |
| denovo847 | 1 | 12 | CO            |
| denovo848 | 1 | 3  | CR5           |
| denovo849 | 1 | 1  | CO            |
| denovo85  | 1 | 1  | CO            |
| denovo850 | 2 | 4  | CO,CR5        |
| denovo851 | 1 | 8  | CO            |
| denovo852 | 1 | 2  | CR8           |
| denovo853 | 3 | 40 | CO,CR8,CR5    |
| denovo854 | 1 | 1  | CR5           |
| denovo855 | 1 | 1  | CO            |
| denovo856 | 1 | 1  | CR5           |
| denovo857 | 1 | 1  | CR5           |
| denovo858 | 2 | 45 | CO,UR         |
| denovo859 | 1 | 4  | CO            |
| denovo86  | 1 | 3  | CO            |
| denovo860 | 1 | 1  | CO            |
| denovo861 | 1 | 1  | CR8           |
| denovo862 | 2 | 7  | CO,CR5        |
| denovo863 | 1 | 1  | CO            |
| denovo864 | 1 | 1  | CO            |
| denovo865 | 1 | 2  | CR8           |
| denovo866 | 2 | 4  | CO,CR8        |
| denovo867 | 1 | 1  | CR5           |
| denovo868 | 4 | 14 | CO,UR,CR8,CR5 |
| denovo869 | 1 | 1  | CR8           |
| denovo87  | 2 | 3  | CO,UR         |
| denovo870 | 1 | 2  | CR5           |
| denovo871 | 1 | 1  | CR8           |
| denovo872 | 2 | 2  | CO,CR5        |
| denovo873 | 2 | 3  | CO,CR5        |
| denovo874 | 3 | 5  | CO,UR,CR5     |

|           |   |    |               |
|-----------|---|----|---------------|
| denovo875 | 1 | 2  | CR8           |
| denovo876 | 2 | 3  | CO,CR8        |
| denovo877 | 1 | 4  | CO            |
| denovo878 | 4 | 41 | CO,UR,CR8,CR5 |
| denovo879 | 1 | 1  | CR8           |
| denovo88  | 1 | 2  | CR5           |
| denovo880 | 4 | 32 | CO,UR,CR8,CR5 |
| denovo881 | 1 | 1  | UR            |
| denovo882 | 3 | 7  | CO,UR,CR5     |
| denovo883 | 1 | 4  | CR8           |
| denovo885 | 4 | 37 | CO,UR,CR8,CR5 |
| denovo886 | 3 | 12 | UR,CR8,CR5    |
| denovo887 | 2 | 5  | CO,CR8        |
| denovo888 | 1 | 2  | UR            |
| denovo889 | 1 | 5  | CR5           |
| denovo89  | 1 | 1  | CR5           |
| denovo890 | 1 | 1  | CR5           |
| denovo891 | 1 | 1  | CR8           |
| denovo892 | 1 | 1  | CR8           |
| denovo893 | 1 | 5  | UR            |
| denovo894 | 1 | 1  | UR            |
| denovo895 | 1 | 1  | UR            |
| denovo896 | 3 | 11 | UR,CR8,CR5    |
| denovo897 | 3 | 26 | CO,CR8,CR5    |
| denovo899 | 1 | 1  | CO            |
| denovo9   | 1 | 1  | UR            |
| denovo901 | 1 | 2  | CO            |
| denovo902 | 3 | 28 | CO,CR8,CR5    |
| denovo903 | 1 | 1  | CO            |
| denovo904 | 1 | 1  | CR8           |
| denovo905 | 3 | 3  | CO,CR8,CR5    |
| denovo906 | 1 | 1  | CO            |
| denovo907 | 2 | 3  | CO,CR8        |
| denovo908 | 1 | 1  | CR8           |
| denovo909 | 1 | 2  | CR8           |
| denovo91  | 3 | 6  | CO,UR,CR5     |
| denovo910 | 1 | 1  | CO            |
| denovo911 | 3 | 4  | CO,UR,CR8     |
| denovo912 | 1 | 2  | CO            |
| denovo913 | 1 | 1  | CO            |
| denovo915 | 1 | 3  | CO            |
| denovo916 | 1 | 1  | CO            |
| denovo917 | 1 | 1  | CO            |
| denovo918 | 3 | 10 | CO,CR8,CR5    |
| denovo919 | 1 | 3  | CR8           |
| denovo92  | 1 | 9  | UR            |
| denovo920 | 1 | 2  | CO            |
| denovo921 | 1 | 2  | CR8           |
| denovo922 | 3 | 3  | CO,CR8,CR5    |
| denovo923 | 2 | 2  | CR8,CR5       |
| denovo924 | 1 | 1  | UR            |
| denovo925 | 1 | 1  | CR5           |
| denovo926 | 1 | 1  | CR5           |
| denovo927 | 1 | 2  | CR8           |
| denovo928 | 3 | 28 | CO,CR8,CR5    |
| denovo929 | 2 | 2  | CO,CR8        |
| denovo93  | 1 | 11 | CR8           |
| denovo930 | 3 | 4  | CO,CR8,CR5    |
| denovo931 | 1 | 1  | CO            |
| denovo933 | 1 | 1  | CR5           |
| denovo934 | 2 | 2  | CO,CR5        |
| denovo935 | 4 | 22 | CO,UR,CR8,CR5 |
| denovo936 | 1 | 4  | CO            |
| denovo937 | 1 | 2  | CR5           |
| denovo938 | 2 | 8  | CR8,CR5       |
| denovo939 | 1 | 58 | CO            |
| denovo940 | 1 | 2  | CO            |

|           |     |      |               |
|-----------|-----|------|---------------|
| denovo941 | 1   | 1    | CO            |
| denovo942 | 1   | 1    | UR            |
| denovo943 | 1   | 1    | CR5           |
| denovo944 | 1   | 48   | CO            |
| denovo945 | 1   | 2    | CO            |
| denovo946 | 2   | 8    | CO,CR8        |
| denovo947 | 3   | 11   | CO,CR8,CR5    |
| denovo948 | 1   | 3    | CO            |
| denovo949 | 2   | 6    | CO,CR8        |
| denovo95  | 4   | 8    | CO,UR,CR8,CR5 |
| denovo950 | 1   | 1    | CR5           |
| denovo951 | 1   | 1    | CO            |
| denovo952 | 1   | 1    | CR8           |
| denovo953 | 4   | 22   | CO,UR,CR8,CR5 |
| denovo954 | 1   | 1    | CO            |
| denovo955 | 4   | 6    | CO,UR,CR8,CR5 |
| denovo956 | 1   | 2    | CR8           |
| denovo957 | 1   | 6    | CR8           |
| denovo958 | 1   | 1    | CO            |
| denovo96  | 4   | 32   | CO,UR,CR8,CR5 |
| denovo960 | 2   | 2    | CO,CR8        |
| denovo961 | 1   | 1    | CO            |
| denovo963 | 3   | 10   | CO,CR8,CR5    |
| denovo964 | 4   | 14   | CO,UR,CR8,CR5 |
| denovo965 | 2   | 4    | UR,CR5        |
| denovo966 | 1   | 1    | CO            |
| denovo967 | 2   | 3    | CO,CR5        |
| denovo968 | 1   | 18   | CO            |
| denovo969 | 1   | 1    | CO            |
| denovo97  | 2   | 2    | CO,CR5        |
| denovo970 | 1   | 1    | CO            |
| denovo971 | 1   | 1    | UR            |
| denovo972 | 1   | 1    | CO            |
| denovo973 | 3   | 24   | CO,CR8,CR5    |
| denovo974 | 1   | 1    | CR8           |
| denovo975 | 1   | 1    | CO            |
| denovo977 | 3   | 9    | CO,UR,CR8     |
| denovo978 | 1   | 1    | CR8           |
| denovo979 | 2   | 7    | CO,CR8        |
| denovo98  | 1   | 3    | CR8           |
| denovo980 | 3   | 6    | CO,UR,CR8     |
| denovo981 | 3   | 19   | CO,CR8,CR5    |
| denovo982 | 1   | 2    | CO            |
| denovo983 | 1   | 1    | CR5           |
| denovo984 | 1   | 10   | CO            |
| denovo985 | 1   | 1    | CO            |
| denovo987 | 1   | 1    | CO            |
| denovo988 | 1   | 6    | CO            |
| denovo989 | 1   | 1    | CO            |
| denovo99  | 2   | 2    | CO,CR8        |
| denovo990 | 1   | 1    | CO            |
| denovo991 | 1   | 1    | CR5           |
| denovo992 | 1   | 2    | CR8           |
| denovo993 | 1   | 1    | CO            |
| denovo994 | 1   | 1    | CO            |
| denovo995 | 1   | 2    | CO            |
| denovo996 | 1   | 7    | CO            |
| denovo997 | 3   | 7    | CO,UR,CR5     |
| denovo998 | 1   | 1    | CO            |
| denovo999 | 2   | 3    | UR,CR8        |
| MID1      | 725 | 3619 |               |
| MID2      | 234 | 834  |               |
| MID3      | 486 | 1659 |               |
| MID4      | 455 | 1837 |               |
| MID5      | 0   | 0    |               |

Table S9.2. real edge table for pOTU network (based on pyrotagsequencing data) and visualization in Cytoscape

| from | to         | eweight | consensus_lin                                                                                                   |
|------|------------|---------|-----------------------------------------------------------------------------------------------------------------|
| MID1 | denovo10   | 1       | k__Bacteria;p__Planctomycetes;c__Planctomycetia;o__Pirellulales:f__Pirellulaceae:g__                            |
| MID1 | denovo100  | 14      | k__Bacteria;p__Actinobacteria;c__Actinobacteria;o__Actinomycetales:f__Microbacteriaceae:g__Leucobacter          |
| MID1 | denovo1001 | 1       | k__Bacteria;p__Proteobacteria;c__Alphaproteobacteria;o__Rhodobacterales:f__Rhodobacteraceae:g__Rubellimicrobium |
| MID1 | denovo1003 | 8       | k__Bacteria;p__Chloroflexi;c__Thermomicrobia;o__JG30-KF-CM45:f__g__                                             |
| MID1 | denovo1004 | 1       | k__Bacteria;p__Actinobacteria;c__Actinobacteria;o__Actinomycetales:f__Nocardioidaceae:g__Aeromicrobium          |
| MID1 | denovo1006 | 2       | k__Bacteria;p__Bacteroidetes;c__Flavobacteriia;o__Flavobacteriales:f__[Weeksellaceae]:g__Chryseobacterium       |
| MID1 | denovo1007 | 1       | k__Bacteria;p__Armatimonadetes;c__Armatimonadia;o__Armatimonadales:f__Armatimonadaceae:g__                      |
| MID1 | denovo1008 | 3       | k__Bacteria;p__Actinobacteria;c__Actinobacteria;o__Actinomycetales:f__Micromonosporaceae:g__                    |
| MID1 | denovo1009 | 1       | k__Bacteria;p__Acidobacteria;c__[Chloracidobacteria];o__RB41:f__Ellin6075:g__                                   |
| MID1 | denovo1010 | 1       | k__Bacteria;p__Firmicutes;c__Bacilli;o__Bacillales:f__Bacillaceae:g__Bacillus                                   |
| MID1 | denovo1012 | 1       | k__Bacteria;p__Proteobacteria;c__Alphaproteobacteria;o__Rhizobiales:f__Bradyrhizobiaceae:g__                    |
| MID1 | denovo1013 | 3       | k__Bacteria;p__Cyanobacteria;c__Nostocophycideae;o__Nostocales:f__Nostocaceae                                   |
| MID1 | denovo1014 | 9       | k__Bacteria;p__Proteobacteria;c__Alphaproteobacteria;o__Rhizobiales:f__Bradyrhizobiaceae:g__Balneimonas         |
| MID1 | denovo1016 | 1       | k__Bacteria;p__Firmicutes;c__Clostridia;o__Clostridiales:f__Lachnospiraceae:g__[Ruminococcus]                   |
| MID1 | denovo1017 | 3       | k__Bacteria;p__Cyanobacteria;c__Synechococcophycideae;o__Pseudanabaenales:f__Pseudanabaenaceae:g__Leptolyngbya  |
| MID1 | denovo1018 | 3       | k__Bacteria;p__Firmicutes;c__Clostridia;o__Clostridiales:f__[Tissierellaceae]:g__Peptoniphilus                  |
| MID1 | denovo102  | 1       | k__Bacteria;p__Proteobacteria;c__Betaproteobacteria;o__Burkholderiales:f__Oxalobacteraceae:g__                  |
| MID1 | denovo1021 | 1       | k__Bacteria;p__Acidobacteria;c__Solibacteres;o__Solibacterales:f__Solibacteraceae:g__                           |
| MID1 | denovo1023 | 7       | k__Bacteria;p__Planctomycetes;c__Planctomycetia;o__Pirellulales:f__Pirellulaceae:g__                            |
| MID1 | denovo1024 | 6       | k__Bacteria;p__Proteobacteria;c__Betaproteobacteria;o__Burkholderiales:f__Comamonadaceae:g__                    |
| MID1 | denovo1027 | 13      | k__Bacteria;p__Cyanobacteria;c__Nostocophycideae;o__Nostocales:f__Nostocaceae:g__Nostoc                         |
| MID1 | denovo1030 | 1       | k__Bacteria;p__Actinobacteria;c__Acidimicrobiia;o__Acidimicrobiales:f__g__                                      |
| MID1 | denovo1032 | 1       | k__Bacteria;p__Firmicutes;c__Bacilli;o__Lactobacillales:f__g__                                                  |
| MID1 | denovo1035 | 1       | k__Bacteria;p__Actinobacteria;c__Actinobacteria;o__Actinomycetales:f__Micrococcaceae:g__                        |
| MID1 | denovo1037 | 2       | k__Bacteria;p__Actinobacteria;c__Actinobacteria;o__Actinomycetales:f__Corynebacteriaceae:g__Corynebacterium     |
| MID1 | denovo104  | 1       | k__Bacteria;p__Proteobacteria;c__Gammaproteobacteria;o__Alteromonadales:f__Alteromonadaceae:g__Cellvibrio       |
| MID1 | denovo1040 | 1       | k__Bacteria;p__Proteobacteria;c__Alphaproteobacteria;o__Rickettsiales:f__Rickettsiaceae:g__Rickettsia           |
| MID1 | denovo1042 | 2       | k__Bacteria;p__Firmicutes;c__Clostridia;o__Clostridiales:f__Ruminococcaceae:g__                                 |
| MID1 | denovo1046 | 14      | k__Bacteria;p__Proteobacteria;c__Betaproteobacteria;o__Burkholderiales:f__Comamonadaceae:g__                    |
| MID1 | denovo1048 | 1       | k__Bacteria;p__Firmicutes;c__Clostridia;o__Clostridiales:f__Lachnospiraceae:g__                                 |
| MID1 | denovo1054 | 3       | k__Bacteria;p__Firmicutes;c__Bacilli;o__Bacillales:f__Bacillaceae:g__Bacillus                                   |
| MID1 | denovo1055 | 1       | k__Bacteria;p__Proteobacteria;c__Alphaproteobacteria;o__Sphingomonadales:f__Sphingomonadaceae                   |
| MID1 | denovo1056 | 3       | k__Bacteria;p__Actinobacteria;c__Actinobacteria;o__Actinomycetales:f__Nocardioidaceae:g__Propionimonas          |
| MID1 | denovo1057 | 2       | k__Bacteria;p__Actinobacteria;c__Acidimicrobiia;o__Acidimicrobiales:f__Jamiaceae:g__Jamia                       |
| MID1 | denovo1058 | 1       | k__Bacteria;p__Proteobacteria;c__Alphaproteobacteria;o__Rhodospirillales:f__Acetobacteraceae:g__                |
| MID1 | denovo1059 | 10      | k__Bacteria;p__Actinobacteria;c__Actinobacteria;o__Actinomycetales:f__Microbacteriaceae:g__Microbacterium       |
| MID1 | denovo106  | 4       | k__Bacteria;p__Firmicutes;c__Clostridia;o__Clostridiales:f__Lachnospiraceae                                     |
| MID1 | denovo1063 | 3       | k__Bacteria;p__Planctomycetes;c__Phycisphaerae;o__WD2101:f__g__                                                 |
| MID1 | denovo1065 | 1       | k__Bacteria;p__Gemmatimonadetes;c__Gemmatimonadetes;o__Gemmatimonadales:f__g__                                  |
| MID1 | denovo1066 | 1       | k__Bacteria;p__Gemmatimonadetes;c__Gemmatimonadetes;o__f__g__                                                   |
| MID1 | denovo1067 | 2       | k__Bacteria;p__Proteobacteria;c__Alphaproteobacteria;o__Rhizobiales:f__Beijerinckiaceae:g__                     |
| MID1 | denovo107  | 2       | k__Bacteria;p__Proteobacteria;c__Alphaproteobacteria;o__Rhodobacterales:f__Rhodobacteraceae:g__Rubellimicrobium |
| MID1 | denovo1072 | 1       | k__Bacteria;p__Firmicutes;c__Clostridia;o__Clostridiales:f__Lachnospiraceae:g__                                 |
| MID1 | denovo1073 | 1       | k__Bacteria;p__Proteobacteria;c__Gammaproteobacteria;o__Xanthomonadales:f__Xanthomonadaceae:g__Stenotrophomonas |
| MID1 | denovo1075 | 1       | k__Bacteria;p__Acidobacteria;c__[Chloracidobacteria];o__DS-100:f__g__                                           |
| MID1 | denovo1077 | 8       | k__Bacteria;p__Proteobacteria;c__Alphaproteobacteria;o__Rhizobiales:f__Hyphomicrobiaceae:g__Devosia             |
| MID1 | denovo1078 | 2       | k__Bacteria;p__Acidobacteria;c__Acidobacteria-6;o__iii1-15:f__g__                                               |
| MID1 | denovo1080 | 5       | k__Bacteria;p__Gemmatimonadetes;c__Gemmatimonadetes;o__Gemmatimonadales:f__g__                                  |
| MID1 | denovo1081 | 1       | k__Bacteria;p__Cyanobacteria;c__4C0d-2;o__SM1D11:f__g__                                                         |
| MID1 | denovo1083 | 4       | k__Bacteria;p__Chloroflexi;c__Thermomicrobia;o__JG30-KF-CM45:f__g__                                             |
| MID1 | denovo1084 | 6       | k__Bacteria;p__Proteobacteria;c__Alphaproteobacteria;o__Caulobacterales:f__Caulobacteraceae:g__                 |
| MID1 | denovo1086 | 3       | k__Bacteria;p__Actinobacteria;c__Actinobacteria;o__Actinomycetales:f__Nocardioidaceae:g__                       |
| MID1 | denovo1088 | 1       | k__Bacteria;p__Actinobacteria;c__Actinobacteria;o__Actinomycetales:f__Kineosporiaceae:g__                       |
| MID1 | denovo109  | 1       | k__Bacteria;p__Proteobacteria;c__Gammaproteobacteria;o__Enterobacterales:f__Enterobacteriaceae                  |
| MID1 | denovo1091 | 1       | k__Bacteria;p__Proteobacteria;c__Betaproteobacteria;o__Burkholderiales:f__Comamonadaceae:g__                    |
| MID1 | denovo1093 | 3       | k__Bacteria;p__Firmicutes;c__Bacilli;o__Lactobacillales:f__Lactobacillaceae:g__Lactobacillus                    |
| MID1 | denovo1094 | 7       | k__Bacteria;p__Firmicutes;c__Bacilli;o__Lactobacillales:f__Aerococcaceae:g__Facklamia                           |
| MID1 | denovo1098 | 1       | k__Bacteria;p__Actinobacteria;c__Actinobacteria;o__Actinomycetales:f__Nocardioidaceae:g__                       |
| MID1 | denovo11   | 1       | k__Bacteria;p__Acidobacteria;c__Solibacteres;o__Solibacterales:f__g__                                           |
| MID1 | denovo1100 | 2       | k__Bacteria;p__Firmicutes;c__Clostridia;o__Clostridiales:f__Lachnospiraceae:g__                                 |
| MID1 | denovo1101 | 1       | k__Bacteria;p__Proteobacteria;c__Alphaproteobacteria;o__Rhodobacterales:f__Rhodobacteraceae:g__Rubellimicrobium |
| MID1 | denovo1102 | 1       | k__Bacteria;p__Proteobacteria;c__Alphaproteobacteria;o__Rhodospirillales:f__Rhodospirillaceae:g__               |
| MID1 | denovo1103 | 4       | k__Bacteria;p__Gemmatimonadetes;c__Gemmatimonadetes;o__Gemmatimonadales:f__g__                                  |

|      |            |     |                                                                                                                |
|------|------------|-----|----------------------------------------------------------------------------------------------------------------|
| MID1 | denovo1109 | 83  | k_Bacteria:p__Proteobacteria:c__Alphaproteobacteria:o__Rhodobacterales:f__Rhodobacteraceae                     |
| MID1 | denovo111  | 1   | k_Bacteria:p__Proteobacteria:c__Alphaproteobacteria:o__Rhizobiales:f__Phyllobacteriaceae                       |
| MID1 | denovo1112 | 2   | k_Bacteria:p__Proteobacteria:c__Alphaproteobacteria:o__Rhizobiales:f__Brucellaceae                             |
| MID1 | denovo1113 | 1   | k_Bacteria:p__Proteobacteria:c__Gammaproteobacteria:o__Xanthomonadales:f__Xanthomonadaceae:g__                 |
| MID1 | denovo1114 | 1   | k_Bacteria:p__Proteobacteria:c__Alphaproteobacteria:o__Rhizobiales:f__Bradyrhizobiaceae:g__                    |
| MID1 | denovo1118 | 1   | k_Bacteria:p__Firmicutes:c__Bacilli:o__Bacillales:f__Paenibacillaceae:g__                                      |
| MID1 | denovo1119 | 1   | k_Bacteria:p__Proteobacteria:c__Alphaproteobacteria:o__Rhodobacterales:f__Rhodobacteraceae:g__Amaricoccus      |
| MID1 | denovo1121 | 3   | k_Bacteria:p__Bacteroidetes:c__Flavobacteriia:o__Flavobacteriales:f__[Weeksellaceae]:g__Chryseobacterium       |
| MID1 | denovo1122 | 99  | k_Bacteria:p__Proteobacteria:c__Gammaproteobacteria:o__Legionellales:f__Coxiellaceae:g__Rickettsiella          |
| MID1 | denovo1124 | 107 | k_Bacteria:p__Proteobacteria:c__Betaproteobacteria:o__Rhodocyclales:f__Rhodocyclaceae:g__Thauera               |
| MID1 | denovo1131 | 1   | k_Bacteria:p__Actinobacteria:c__Actinobacteria:o__Actinomycetales:f__Sanguibacteraceae:g__Sanguibacter         |
| MID1 | denovo1132 | 1   | k_Bacteria:p__Firmicutes:c__Bacilli:o__Lactobacillales:f__Enterococcaceae:g__Vagococcus                        |
| MID1 | denovo1133 | 1   | k_Bacteria:p__Firmicutes:c__Bacilli:o__Bacillales:f__Planococcaceae:g__Sporosarcina                            |
| MID1 | denovo1134 | 2   | k_Bacteria:p__Proteobacteria:c__Alphaproteobacteria:o__Sphingomonadales:f__Sphingomonadaceae:g__               |
| MID1 | denovo1135 | 1   | k_Bacteria:p__Actinobacteria:c__Acidimicrobia:o__Acidimicrobiales:f__g__                                       |
| MID1 | denovo1136 | 1   | k_Bacteria:p__Firmicutes:c__Clostridia:o__Clostridiales:f__[Tissierellaceae]:g__Parvimonas                     |
| MID1 | denovo114  | 3   | k_Bacteria:p__Cyanobacteria:c__Chloroplast:o__Chlorophyta:f__g__                                               |
| MID1 | denovo1140 | 1   | k_Bacteria:p__[Thermi]:c__Deinococci:o__Deinococcales:f__Deinococcaceae:g__Deinococcus                         |
| MID1 | denovo1143 | 1   | k_Bacteria:p__Proteobacteria:c__Alphaproteobacteria:o__Rhizobiales:f__Brucellaceae                             |
| MID1 | denovo1144 | 1   | k_Bacteria:p__Gemmatimonadetes:c__Gemmatimonadetes                                                             |
| MID1 | denovo1149 | 6   | k_Bacteria:p__Proteobacteria:c__Alphaproteobacteria:o__Rhizobiales:f__Methylobacteriaceae:g__Methylobacterium  |
| MID1 | denovo115  | 3   | k_Bacteria:p__Gemmatimonadetes:c__Gemmatimonadetes:o__Gemmatimonadales:f__g__                                  |
| MID1 | denovo1150 | 3   | k_Bacteria:p__Firmicutes:c__Clostridia:o__Clostridiales:f__Lachnospiraceae:g__Roseburia                        |
| MID1 | denovo1151 | 1   | k_Bacteria:p__Firmicutes:c__Bacilli:o__Bacillales:f__Planococcaceae:g__Solibacillus                            |
| MID1 | denovo1153 | 3   | k_Bacteria:p__Cyanobacteria:c__Nostocophycideae:o__Stigonematales:f__Rivulariaceae:g__Calothrix                |
| MID1 | denovo1154 | 2   | k_Bacteria:p__Proteobacteria:c__Betaproteobacteria:o__Burkholderiales:f__Alcaligenaceae:g__Pigmentiphaga       |
| MID1 | denovo1157 | 1   | k_Bacteria:p__Proteobacteria:c__Alphaproteobacteria:o__Rhodobacterales:f__Rhodobacteraceae:g__Amaricoccus      |
| MID1 | denovo1162 | 1   | k_Bacteria:p__Proteobacteria:c__Alphaproteobacteria:o__Sphingomonadales:f__Sphingomonadaceae:g__               |
| MID1 | denovo1164 | 2   | k_Bacteria:p__Bacteroidetes:c__Cytophagia:o__Cytophagales:f__Cytophagaceae:g__                                 |
| MID1 | denovo1165 | 2   | k_Bacteria:p__Firmicutes:c__Clostridia:o__Clostridiales:f__[Tissierellaceae]:g__Anaerococcus                   |
| MID1 | denovo1166 | 2   | k_Bacteria:p__Proteobacteria:c__Gammaproteobacteria:o__Xanthomonadales:f__Sinobacteraceae:g__                  |
| MID1 | denovo1168 | 2   | k_Bacteria:p__Proteobacteria:c__Deltaproteobacteria:o__Myxococcales:f__g__                                     |
| MID1 | denovo1169 | 1   | k_Bacteria:p__Cyanobacteria:c__Synechococcophycideae:o__Pseudanabaenales:f__Pseudanabaenaceae:g__Leptolyngbya  |
| MID1 | denovo1170 | 1   | k_Bacteria:p__Actinobacteria:c__Actinobacteria:o__Actinomycetales:f__Dermacoccaceae:g__Dermacoccus             |
| MID1 | denovo1173 | 39  | k_Bacteria:p__Proteobacteria:c__Alphaproteobacteria:o__Rhodobacterales:f__Rhodobacteraceae:g__Paracoccus       |
| MID1 | denovo1174 | 1   | Unassigned                                                                                                     |
| MID1 | denovo1175 | 2   | k_Bacteria:p__Proteobacteria:c__Alphaproteobacteria:o__Rhizobiales:f__Hyphomicrobiaceae:g__Hyphomicrobium      |
| MID1 | denovo1178 | 4   | k_Bacteria:p__Firmicutes:c__Clostridia:o__Clostridiales:f__Lachnospiraceae:g__                                 |
| MID1 | denovo1179 | 4   | k_Bacteria:p__Cyanobacteria:c__Synechococcophycideae:o__Pseudanabaenales:f__Pseudanabaenaceae:g__Leptolyngbya  |
| MID1 | denovo118  | 1   | k_Bacteria:p__Acidobacteria:c__Solibacteres:o__Solibacteriales:f__g__                                          |
| MID1 | denovo1181 | 2   | k_Bacteria:p__Firmicutes:c__Bacilli:o__Bacillales:f__g__                                                       |
| MID1 | denovo1182 | 1   | k_Bacteria:p__Proteobacteria:c__Alphaproteobacteria:o__Rhodospirillales:f__Acetobacteraceae:g__                |
| MID1 | denovo1183 | 2   | k_Bacteria:p__Actinobacteria:c__Actinobacteria:o__Actinomycetales:f__g__                                       |
| MID1 | denovo1184 | 3   | k_Bacteria:p__Proteobacteria:c__Alphaproteobacteria:o__Rhizobiales:f__Phyllobacteriaceae:g__                   |
| MID1 | denovo1187 | 3   | k_Bacteria:p__Proteobacteria:c__Alphaproteobacteria:o__Rhodospirillales:f__Acetobacteraceae:g__                |
| MID1 | denovo1193 | 1   | k_Bacteria:p__Proteobacteria:c__Alphaproteobacteria:o__Rhodobacterales:f__Rhodobacteraceae:g__Rubellimicrobium |
| MID1 | denovo1194 | 2   | k_Bacteria:p__Actinobacteria:c__Acidimicrobia:o__Acidimicrobiales:f__C111:g__                                  |
| MID1 | denovo1195 | 1   | k_Bacteria:p__Proteobacteria:c__Alphaproteobacteria:o__Rhizobiales:f__Phyllobacteriaceae:g__Aminobacter        |
| MID1 | denovo1197 | 5   | k_Bacteria:p__Proteobacteria:c__Betaproteobacteria:o__Burkholderiales:f__Burkholderiaceae:g__                  |
| MID1 | denovo1198 | 1   | k_Bacteria:p__Cyanobacteria:c__Synechococcophycideae:o__Pseudanabaenales:f__Pseudanabaenaceae:g__Leptolyngbya  |
| MID1 | denovo1199 | 1   | k_Bacteria:p__Actinobacteria:c__Acidimicrobia:o__Acidimicrobiales:f__C111:g__                                  |
| MID1 | denovo12   | 1   | k_Bacteria:p__Bacteroidetes:c__Sphingobacteriia:o__Sphingobacteriales:f__g__                                   |
| MID1 | denovo1201 | 2   | k_Bacteria:p__Proteobacteria:c__Alphaproteobacteria:o__Rickettsiales:f__Rickettsiaceae:g__Rickettsia           |
| MID1 | denovo1202 | 14  | k_Bacteria:p__Proteobacteria:c__Alphaproteobacteria:o__Rhizobiales:f__Methylobacteriaceae:g__Methylobacterium  |
| MID1 | denovo1203 | 2   | k_Bacteria:p__Proteobacteria:c__Alphaproteobacteria:o__Rhizobiales:f__Methylobacteriaceae:g__Methylobacterium  |
| MID1 | denovo1209 | 1   | k_Bacteria:p__Firmicutes:c__Bacilli:o__Bacillales:f__Paenibacillaceae:g__                                      |
| MID1 | denovo1211 | 3   | k_Bacteria:p__Proteobacteria:c__Gammaproteobacteria:o__Xanthomonadales:f__Xanthomonadaceae:g__Dokdonella       |
| MID1 | denovo1217 | 2   | k_Bacteria:p__Cyanobacteria:c__Chloroplast:o__Chlorophyta:f__g__                                               |
| MID1 | denovo1219 | 1   | k_Bacteria:p__Firmicutes:c__Clostridia:o__Clostridiales:f__Lachnospiraceae:g__                                 |
| MID1 | denovo1221 | 1   | k_Bacteria:p__Firmicutes:c__Clostridia:o__Clostridiales:f__Ruminococcaceae:g__Ruminococcus                     |
| MID1 | denovo1222 | 2   | k_Bacteria:p__Proteobacteria:c__Betaproteobacteria:o__Burkholderiales:f__Alcaligenaceae:g__                    |
| MID1 | denovo1224 | 1   | k_Bacteria:p__Actinobacteria:c__Actinobacteria:o__Actinomycetales:f__Micromonosporaceae:g__Virgisporangium     |
| MID1 | denovo1226 | 4   | k_Bacteria:p__Actinobacteria:c__Actinobacteria:o__Actinomycetales:f__Nocardiodiaceae:g__Friedmanniella         |
| MID1 | denovo1227 | 3   | k_Bacteria:p__Proteobacteria:c__Alphaproteobacteria:o__Rhizobiales:f__Rhizobiaceae                             |
| MID1 | denovo1229 | 1   | k_Bacteria:p__Bacteroidetes:c__Cytophagia:o__Cytophagales:f__Flammeovirgaceae                                  |
| MID1 | denovo1230 | 1   | k_Bacteria:p__Proteobacteria:c__Betaproteobacteria:o__Burkholderiales:f__Comamonadaceae:g__Comamonas           |
| MID1 | denovo1231 | 5   | k_Bacteria:p__Proteobacteria:c__Alphaproteobacteria:o__Rhodobacterales:f__Rhodobacteraceae:g__Rubellimicrobium |

|      |            |    |                                                                                                          |
|------|------------|----|----------------------------------------------------------------------------------------------------------|
| MID1 | denovo1232 | 1  | k_Bacteria:p_Bacteroidetes:c_Flavobacteriia:o_Flavobacteriales:f_Flavobacteriaceae:g_Flavobacterium      |
| MID1 | denovo1235 | 1  | k_Bacteria:p_Firmicutes:c_Clostridia:o_Clostridiales:f_Clostridiaceae:g_Clostridium                      |
| MID1 | denovo1236 | 1  | k_Bacteria:p_Bacteroidetes:c_Cytophagia:o_Cytophagales:f_Cytophagaceae:g_Rhodocytapha                    |
| MID1 | denovo1242 | 13 | k_Bacteria:p_Proteobacteria:c_Gammaproteobacteria:o_Xanthomonadales:f_Xanthomonadaceae:g_Lysobacter      |
| MID1 | denovo1243 | 11 | k_Bacteria:p_Proteobacteria:c_Alphaproteobacteria:o_Rhizobiales:f_Phyllobacteriaceae                     |
| MID1 | denovo1246 | 1  | k_Bacteria:p_Acidobacteria:c_Acidobacteria-6:o_iii1-15:f_mb2424:g_                                       |
| MID1 | denovo125  | 1  | k_Bacteria:p_Acidobacteria:c_[Chloracidobacteria]:o_RB41:f_ :g_                                          |
| MID1 | denovo1251 | 1  | k_Bacteria:p_Actinobacteria:c_Thermoleophilia:o_Solirubrobacterales:f_ :g_                               |
| MID1 | denovo1253 | 11 | k_Bacteria:p_Proteobacteria:c_Alphaproteobacteria:o_Rhizobiales:f_Rhizobiaceae:g_Agrobacterium           |
| MID1 | denovo1256 | 1  | k_Bacteria:p_Bacteroidetes:c_Cytophagia:o_Cytophagales:f_Cytophagaceae:g_                                |
| MID1 | denovo1257 | 13 | k_Bacteria:p_Proteobacteria:c_Alphaproteobacteria:o_Sphingomonadales:f_Sphingomonadaceae                 |
| MID1 | denovo1259 | 4  | k_Bacteria:p_Proteobacteria:c_Alphaproteobacteria:o_Sphingomonadales:f_Sphingomonadaceae:g_Sphingobium   |
| MID1 | denovo126  | 1  | k_Bacteria:p_Proteobacteria:c_Alphaproteobacteria:o_Rhizobiales:f_Hyphomicrobiaceae:g_Rhodoplanes        |
| MID1 | denovo1262 | 1  | k_Bacteria:p_Proteobacteria:c_Deltaproteobacteria:o_Myxococcales:f_ :g_                                  |
| MID1 | denovo1263 | 3  | k_Bacteria:p_Firmicutes:c_Clostridia:o_Clostridiales:f_[Tissierellaceae]:g_                              |
| MID1 | denovo1264 | 2  | k_Bacteria:p_Proteobacteria:c_Betaproteobacteria:o_Burkholderiales:f_Comamonadaceae                      |
| MID1 | denovo1266 | 1  | k_Bacteria:p_Cyanobacteria:c_Oscillatoriohyphycideae:o_Chroococcales:f_Xenococcaceae:g_                  |
| MID1 | denovo1268 | 3  | k_Bacteria:p_Proteobacteria:c_Alphaproteobacteria:o_Sphingomonadales:f_Sphingomonadaceae:g_              |
| MID1 | denovo127  | 1  | k_Bacteria:p_Proteobacteria:c_Gammaproteobacteria:o_Pseudomonadales:f_Pseudomonadaceae:g_                |
| MID1 | denovo1274 | 1  | k_Bacteria:p_Bacteroidetes:c_Flavobacteriia:o_Flavobacteriales:f_[Weeksellaceae]:g_                      |
| MID1 | denovo1277 | 1  | k_Bacteria:p_Firmicutes:c_Bacilli:o_Bacillales:f_Paenibacillaceae:g_Paenibacillus                        |
| MID1 | denovo1278 | 1  | k_Bacteria:p_Proteobacteria:c_Alphaproteobacteria:o_Rhizobiales:f_Methylobacteriaceae:g_Methylobacterium |
| MID1 | denovo1279 | 1  | k_Bacteria:p_Firmicutes:c_Bacilli:o_Lactobacillales                                                      |
| MID1 | denovo128  | 2  | k_Bacteria:p_Armatimonadetes:c_Armatimonadia:o_Armatimonadales:f_Armatimonadaceae:g_                     |
| MID1 | denovo1281 | 2  | k_Bacteria:p_Actinobacteria:c_Acidimicrobia:o_Acidimicrobiales:f_C111:g_                                 |
| MID1 | denovo1283 | 2  | k_Bacteria:p_Chlorobi:c_OPB56:o_ :f_ :g_                                                                 |
| MID1 | denovo1285 | 2  | k_Bacteria:p_Firmicutes:c_Clostridia:o_Clostridiales:f_Lachnospiraceae:g_Blaulia                         |
| MID1 | denovo129  | 1  | k_Bacteria:p_Bacteroidetes:c_Flavobacteriia:o_Flavobacteriales:f_Flavobacteriaceae:g_Gelidibacter        |
| MID1 | denovo1290 | 17 | k_Bacteria:p_Actinobacteria:c_Actinobacteria:o_Actinomycetales:f_Dermabacteraceae:g_Brachybacterium      |
| MID1 | denovo1292 | 1  | k_Bacteria:p_Proteobacteria:c_Alphaproteobacteria:o_Rhodospirillales:f_Acetobacteraceae:g_               |
| MID1 | denovo1293 | 1  | k_Bacteria:p_Firmicutes:c_Clostridia:o_Clostridiales:f_ :g_                                              |
| MID1 | denovo1294 | 15 | k_Bacteria:p_Proteobacteria:c_Betaproteobacteria:o_Burkholderiales:f_Alcigenaceae:g_                     |
| MID1 | denovo1297 | 1  | k_Bacteria:p_Cyanobacteria:c_Chloroplast:o_Chlorophyta:f_Trebouxiohyceae                                 |
| MID1 | denovo1299 | 1  | Unassigned                                                                                               |
| MID1 | denovo1300 | 38 | k_Bacteria:p_Actinobacteria:c_Actinobacteria:o_Actinomycetales:f_Nocardioideaceae:g_Friedmanniella       |
| MID1 | denovo1303 | 1  | k_Bacteria:p_Actinobacteria:c_Actinobacteria:o_Actinomycetales:f_Propionibacteriaceae:g_                 |
| MID1 | denovo1304 | 1  | k_Bacteria:p_Chloroflexi:c_Chloroflexi:o_Chloroflexales:f_Chloroflexaceae                                |
| MID1 | denovo1305 | 1  | k_Bacteria:p_Gemmatimonadetes:c_Gemmatimonadetes:o_Gemmatimonadales:f_ :g_                               |
| MID1 | denovo1307 | 8  | k_Bacteria:p_Cyanobacteria:c_Oscillatoriohyphycideae:o_Oscillatoriales:f_Phormidiaceae:g_Phormidium      |
| MID1 | denovo1308 | 9  | k_Bacteria:p_Firmicutes:c_Bacilli:o_Lactobacillales:f_Streptococcaceae:g_Streptococcus                   |
| MID1 | denovo1309 | 2  | k_Bacteria:p_Proteobacteria:c_Alphaproteobacteria:o_Rhodospirillales:f_Rhodospirillaceae:g_              |
| MID1 | denovo1310 | 3  | k_Bacteria:p_Proteobacteria:c_Betaproteobacteria:o_Burkholderiales:f_Comamonadaceae:g_                   |
| MID1 | denovo1311 | 7  | k_Bacteria:p_Firmicutes:c_Clostridia:o_Clostridiales:f_Clostridiaceae:g_                                 |
| MID1 | denovo1313 | 1  | k_Bacteria:p_Acidobacteria:c_Solibacteres:o_Solibacterales:f_ :g_                                        |
| MID1 | denovo1319 | 3  | k_Bacteria:p_Proteobacteria:c_Alphaproteobacteria:o_Sphingomonadales:f_Sphingomonadaceae:g_Kaistobacter  |
| MID1 | denovo132  | 6  | k_Bacteria:p_Proteobacteria:c_Alphaproteobacteria:o_Sphingomonadales:f_Erythrobacteraceae:g_             |
| MID1 | denovo1320 | 1  | k_Bacteria:p_Acidobacteria:c_Acidobacteriia:o_Acidobacteriales:f_Acidobacteriaceae:g_                    |
| MID1 | denovo1323 | 1  | k_Bacteria:p_Proteobacteria:c_Alphaproteobacteria:o_Rhizobiales:f_Methylocystaceae:g_                    |
| MID1 | denovo1324 | 1  | k_Bacteria:p_Proteobacteria:c_Alphaproteobacteria:o_Rhodospirillales:f_Acetobacteraceae:g_               |
| MID1 | denovo1325 | 1  | k_Bacteria:p_Proteobacteria:c_Alphaproteobacteria:o_Rhizobiales:f_Hyphomicrobiaceae:g_Devesia            |
| MID1 | denovo1326 | 2  | k_Bacteria:p_Proteobacteria:c_Alphaproteobacteria:o_Rhizobiales:f_Aurantimonadaceae:g_                   |
| MID1 | denovo1327 | 1  | k_Bacteria:p_Firmicutes:c_Clostridia:o_Clostridiales:f_Peptococcaceae:g_                                 |
| MID1 | denovo1331 | 1  | k_Bacteria:p_Proteobacteria:c_Alphaproteobacteria:o_Rhizobiales:f_Beijerinckiacaceae:g_                  |
| MID1 | denovo1332 | 1  | k_Bacteria:p_Firmicutes:c_Clostridia:o_Clostridiales:f_Ruminococcaceae:g_Oscillospira                    |
| MID1 | denovo1334 | 60 | k_Bacteria:p_Firmicutes:c_Bacilli:o_Lactobacillales:f_Streptococcaceae:g_Streptococcus                   |
| MID1 | denovo1336 | 1  | k_Bacteria:p_Actinobacteria:c_Acidimicrobia:o_Acidimicrobiales:f_C111:g_                                 |
| MID1 | denovo1337 | 1  | k_Bacteria:p_Proteobacteria:c_Alphaproteobacteria:o_Sphingomonadales:f_Sphingomonadaceae:g_Sphingomonas  |
| MID1 | denovo134  | 9  | k_Bacteria:p_Firmicutes:c_Bacilli:o_Lactobacillales:f_ :g_                                               |
| MID1 | denovo1341 | 1  | k_Bacteria:p_Firmicutes:c_Clostridia:o_Clostridiales:f_[Tissierellaceae]:g_Anaerococcus                  |
| MID1 | denovo1342 | 1  | k_Bacteria:p_Actinobacteria:c_Actinobacteria:o_Actinomycetales:f_Intrasporangiaceae                      |
| MID1 | denovo1343 | 3  | k_Bacteria:p_Proteobacteria:c_Alphaproteobacteria:o_Sphingomonadales:f_Sphingomonadaceae:g_Sphingomonas  |
| MID1 | denovo1344 | 1  | k_Bacteria:p_Bacteroidetes:c_Cytophagia:o_Cytophagales:f_Cytophagaceae:g_Spirosoma                       |
| MID1 | denovo1345 | 4  | k_Bacteria:p_Firmicutes:c_Bacilli:o_Bacillales:f_Alicyclobacillaceae:g_Alicyclobacillus                  |
| MID1 | denovo1346 | 40 | k_Bacteria:p_Firmicutes:c_Bacilli:o_Lactobacillales:f_Streptococcaceae:g_Lactococcus                     |
| MID1 | denovo1349 | 1  | k_Bacteria:p_Proteobacteria:c_Deltaproteobacteria:o_Myxococcales:f_Nannocystaceae:g_Nannocystis          |
| MID1 | denovo1351 | 4  | k_Bacteria:p_Proteobacteria:c_Alphaproteobacteria:o_Rhizobiales:f_Methylocystaceae:g_                    |
| MID1 | denovo1352 | 32 | k_Bacteria:p_Proteobacteria:c_Alphaproteobacteria:o_Rhodobacterales:f_Rhodobacteraceae                   |

|      |            |     |                                                                                                                  |
|------|------------|-----|------------------------------------------------------------------------------------------------------------------|
| MID1 | denovo1353 | 2   | k__Bacteria:p__Firmicutes:c__Clostridia:o__Clostridiales:f__Caldicoprobacteraceae:g__Caldicoprobacter            |
| MID1 | denovo1354 | 13  | k__Bacteria:p__Actinobacteria:c__Actinobacteria:o__Actinomycetales:f__Intrasporangiaceae:g__                     |
| MID1 | denovo1355 | 1   | k__Bacteria:p__Firmicutes:c__Clostridia:o__Clostridiales:f__Eubacteriaceae:g__Alkalibacter                       |
| MID1 | denovo1356 | 8   | k__Bacteria:p__Bacteroidetes:c__Flavobacteriia:o__Flavobacteriales:f__Flavobacteriaceae:g__Aequorivita           |
| MID1 | denovo1358 | 1   | k__Bacteria:p__Bacteroidetes:c__Flavobacteriia:o__Flavobacteriales:f__Flavobacteriaceae:g__Aequorivita           |
| MID1 | denovo1359 | 1   | k__Bacteria:p__Proteobacteria:c__Gammaproteobacteria:o__Xanthomonadales:f__Xanthomonadaceae:g__                  |
| MID1 | denovo1360 | 1   | k__Bacteria:p__Proteobacteria:c__Gammaproteobacteria:o__Pseudomonadales:f__Moraxellaceae:g__                     |
| MID1 | denovo1361 | 12  | k__Bacteria:p__Actinobacteria:c__Actinobacteria:o__Actinomycetales:f__Microbacteriaceae:g__Leucobacter           |
| MID1 | denovo137  | 2   | k__Bacteria:p__Cyanobacteria:c__Chloroplast:o__Chlorophyta:f__g__                                                |
| MID1 | denovo138  | 2   | k__Bacteria:p__Proteobacteria:c__Alphaproteobacteria:o__Rhodospirillales:f__Rhodospirillaceae:g__Skermanella     |
| MID1 | denovo14   | 1   | k__Bacteria:p__Firmicutes:c__Clostridia:o__Clostridiales:f__Clostridiaceae:g__Clostridium                        |
| MID1 | denovo141  | 1   | k__Bacteria:p__Proteobacteria:c__Betaproteobacteria:o__Neisseriales:f__Neisseriaceae:g__                         |
| MID1 | denovo142  | 3   | k__Bacteria:p__Proteobacteria:c__Alphaproteobacteria:o__Rhodobacterales:f__Rhodobacteraceae:g__                  |
| MID1 | denovo143  | 1   | k__Bacteria:p__Actinobacteria:c__Actinobacteria:o__Actinomycetales:f__Nocardioideaceae:g__                       |
| MID1 | denovo144  | 1   | k__Bacteria:p__Actinobacteria:c__Actinobacteria:o__Actinomycetales:f__Propionibacteriaceae:g__Luteococcus        |
| MID1 | denovo147  | 3   | k__Bacteria:p__Firmicutes:c__Clostridia:o__Clostridiales:f__Lachnospiraceae:g__Dorea                             |
| MID1 | denovo148  | 1   | k__Bacteria:p__Cyanobacteria:c__Synechococcophycideae:o__Pseudanabaenales:f__Pseudanabaenaceae:g__Leptolyngbya   |
| MID1 | denovo149  | 2   | k__Bacteria:p__Actinobacteria:c__Actinobacteria:o__Actinomycetales:f__Cellulomonadaceae:g__Cellulomonas          |
| MID1 | denovo15   | 3   | k__Bacteria:p__[Thermi]:c__Deinococci:o__Deinococcales:f__Trueperaceae:g__Truepera                               |
| MID1 | denovo150  | 2   | k__Bacteria:p__Proteobacteria:c__Gammaproteobacteria:o__[Marinicellales]:f__[Marinicellaceae]:g__                |
| MID1 | denovo151  | 2   | k__Bacteria:p__FBP:c__o__f__g__                                                                                  |
| MID1 | denovo152  | 1   | k__Bacteria:p__Actinobacteria:c__Thermoleophila:o__Solirubrobacterales:f__g__                                    |
| MID1 | denovo153  | 2   | k__Bacteria:p__Chlorobi:c__SJA-28:o__f__g__                                                                      |
| MID1 | denovo154  | 1   | k__Bacteria:p__Gemmatimonadetes:c__Gemmatimonadetes:o__Gemmatimonadales:f__g__                                   |
| MID1 | denovo155  | 2   | k__Bacteria:p__Proteobacteria:c__Alphaproteobacteria:o__Rhodobacterales:f__Rhodobacteraceae:g__Rubellimicrobium  |
| MID1 | denovo156  | 1   | k__Bacteria:p__Acidobacteria:c__[Chloracidobacteria]:o__RB41:f__g__                                              |
| MID1 | denovo158  | 1   | k__Bacteria:p__Proteobacteria:c__Alphaproteobacteria:o__Sphingomonadales:f__Sphingomonadaceae:g__                |
| MID1 | denovo159  | 10  | k__Bacteria:p__Actinobacteria:c__Actinobacteria:o__Actinomycetales:f__Propionibacteriaceae:g__Microlunatus       |
| MID1 | denovo163  | 1   | k__Bacteria:p__Proteobacteria:c__Alphaproteobacteria:o__Rhodobacterales:f__Rhodobacteraceae:g__Paracoccus        |
| MID1 | denovo165  | 1   | k__Bacteria:p__Proteobacteria:c__Deltaproteobacteria:o__Spirobacillales:f__g__                                   |
| MID1 | denovo167  | 1   | k__Bacteria:p__Bacteroidetes:c__Bacteroidia:o__Bacteroidales:f__S24-7:g__                                        |
| MID1 | denovo172  | 1   | k__Bacteria:p__Planctomycetes:c__Planctomycetia:o__Gemmatales:f__Gemmataceae:g__                                 |
| MID1 | denovo173  | 4   | k__Bacteria:p__Proteobacteria:c__Alphaproteobacteria:o__Rhodospirillales:f__Rhodospirillaceae:g__                |
| MID1 | denovo177  | 31  | k__Bacteria:p__Proteobacteria:c__Betaproteobacteria:o__Nitrosomonadales:f__Nitrosomonadaceae                     |
| MID1 | denovo178  | 2   | k__Bacteria:p__Bacteroidetes:c__[Rhodothermi]:o__[Rhodothermales]:f__Rhodothermaceae:g__Rubricoccus              |
| MID1 | denovo183  | 168 | k__Bacteria:p__Cyanobacteria:c__Oscillatoriophyycideae:o__Chroococcales:f__Xenococcaceae                         |
| MID1 | denovo184  | 1   | k__Bacteria:p__Firmicutes:c__Clostridia:o__Clostridiales:f__[Tissierellaceae]:g__Peptoniphilus                   |
| MID1 | denovo185  | 2   | k__Bacteria:p__Proteobacteria:c__Gammaproteobacteria:o__Xanthomonadales:f__Xanthomonadaceae:g__                  |
| MID1 | denovo187  | 4   | k__Bacteria:p__Firmicutes:c__Clostridia:o__Clostridiales:f__Clostridiaceae:g__                                   |
| MID1 | denovo19   | 16  | k__Bacteria:p__Bacteroidetes:c__Bacteroidia:o__Bacteroidales:f__Porphyromonadaceae:g__                           |
| MID1 | denovo193  | 3   | k__Bacteria:p__Proteobacteria:c__Alphaproteobacteria:o__Caulobacterales:f__Caulobacteraceae:g__Phenyllobacterium |
| MID1 | denovo196  | 1   | k__Bacteria:p__Proteobacteria:c__Alphaproteobacteria:o__Rhodobacterales:f__Rhodobacteraceae:g__                  |
| MID1 | denovo197  | 2   | k__Bacteria:p__Bacteroidetes:c__Flavobacteriia:o__Flavobacteriales:f__[Weeksellaceae]:g__Wautersiella            |
| MID1 | denovo198  | 1   | k__Bacteria:p__Actinobacteria:c__Actinobacteria:o__Actinomycetales:f__Microbacteriaceae:g__Leucobacter           |
| MID1 | denovo2    | 1   | k__Bacteria:p__Proteobacteria:c__Betaproteobacteria:o__Burkholderiales:f__Oxalobacteraceae:g__                   |
| MID1 | denovo20   | 5   | k__Bacteria:p__Proteobacteria:c__Alphaproteobacteria:o__Sphingomonadales:f__Sphingomonadaceae:g__                |
| MID1 | denovo200  | 42  | k__Bacteria:p__Proteobacteria:c__Alphaproteobacteria:o__Rhodobacterales:f__Rhodobacteraceae:g__Rhodobacter       |
| MID1 | denovo202  | 1   | k__Bacteria:p__Proteobacteria:c__Alphaproteobacteria:o__Rhizobiales:f__Hyphomicrobiaceae:g__Devosia              |
| MID1 | denovo203  | 2   | k__Bacteria:p__Proteobacteria:c__Gammaproteobacteria:o__Xanthomonadales:f__Xanthomonadaceae:g__                  |
| MID1 | denovo205  | 1   | k__Bacteria:p__Bacteroidetes:c__Flavobacteriia:o__Flavobacteriales:f__[Weeksellaceae]:g__                        |
| MID1 | denovo207  | 4   | k__Bacteria:p__Actinobacteria:c__Acidimicrobia:o__Acidimicrobiales:f__C111:g__                                   |
| MID1 | denovo209  | 1   | k__Bacteria:p__Cyanobacteria:c__Oscillatoriophyycideae:o__Chroococcales:f__Xenococcaceae:g__Chroococcidiopsis    |
| MID1 | denovo210  | 5   | k__Bacteria:p__Proteobacteria:c__Gammaproteobacteria:o__Xanthomonadales:f__Xanthomonadaceae:g__                  |
| MID1 | denovo211  | 1   | k__Bacteria:p__Proteobacteria:c__Alphaproteobacteria:o__Rhizobiales:f__Phyllobacteriaceae:g__                    |
| MID1 | denovo212  | 1   | k__Bacteria:p__Cyanobacteria:c__Chloroplast:o__Streptophyta:f__g__                                               |
| MID1 | denovo213  | 5   | k__Bacteria:p__Proteobacteria:c__Gammaproteobacteria:o__Xanthomonadales:f__Xanthomonadaceae:g__Luteimonas        |
| MID1 | denovo215  | 10  | k__Bacteria:p__Planctomycetes:c__Planctomycetia:o__Pirellulales:f__Pirellulaceae:g__                             |
| MID1 | denovo216  | 2   | k__Bacteria:p__Actinobacteria:c__Actinobacteria:o__Actinomycetales:f__Nocardioideaceae:g__Propionicimonas        |
| MID1 | denovo217  | 3   | k__Bacteria:p__Actinobacteria:c__Actinobacteria:o__Actinomycetales:f__g__                                        |
| MID1 | denovo218  | 5   | k__Bacteria:p__Cyanobacteria:c__Oscillatoriophyycideae:o__Oscillatoriales:f__Phormidiaceae:g__Phormidium         |
| MID1 | denovo219  | 1   | k__Bacteria:p__Proteobacteria:c__Alphaproteobacteria:o__Rhodobacterales:f__Rhodobacteraceae:g__Rubellimicrobium  |
| MID1 | denovo22   | 1   | k__Bacteria:p__Proteobacteria:c__Alphaproteobacteria:o__Rhodobacterales:f__Rhodobacteraceae                      |
| MID1 | denovo222  | 1   | k__Bacteria:p__Proteobacteria:c__Deltaproteobacteria:o__MIZ46:f__g__                                             |
| MID1 | denovo223  | 2   | k__Bacteria:p__FBP:c__o__f__g__                                                                                  |
| MID1 | denovo226  | 1   | k__Bacteria:p__Proteobacteria:c__Gammaproteobacteria:o__Xanthomonadales:f__Xanthomonadaceae:g__                  |
| MID1 | denovo228  | 5   | k__Bacteria:p__Proteobacteria:c__Alphaproteobacteria:o__Sphingomonadales:f__Sphingomonadaceae:g__Sphingomonas    |
| MID1 | denovo229  | 2   | k__Bacteria:p__Proteobacteria:c__Alphaproteobacteria:o__Rhodospirillales:f__Acetobacteraceae:g__                 |

|      |           |     |                                                                                                           |
|------|-----------|-----|-----------------------------------------------------------------------------------------------------------|
| MID1 | denovo23  | 1   | k_Bacteria:p_Cyanobacteria:c_Oscillatorioophycideae:o_Chroococcales:f_Xenococcaceae:g__                   |
| MID1 | denovo233 | 1   | k_Bacteria:p_Bacteroidetes:c_[Saprosirae]:o_[Saprosirales]:f_Chitinophagaceae:g__                         |
| MID1 | denovo235 | 5   | k_Bacteria:p_Proteobacteria:c_Alphaproteobacteria:o_Sphingomonadales:f_Erythrobacteraceae:g__             |
| MID1 | denovo236 | 4   | k_Bacteria:p_Actinobacteria:c_Actinobacteria:o_Actinomycetales:f_Geodermatophilaceae:g__                  |
| MID1 | denovo237 | 115 | k_Bacteria:p_Firmicutes:c_Clostridia:o_Clostridiales:f_[Tissierellaceae]:g__                              |
| MID1 | denovo239 | 3   | k_Bacteria:p_Gemmatimonadetes:c_Gemmatimonadetes:o_f_:g__                                                 |
| MID1 | denovo240 | 1   | k_Bacteria:p_Acidobacteria:c_Solibacteres:o_Solibacterales:f_:g__                                         |
| MID1 | denovo241 | 1   | k_Bacteria:p_Proteobacteria:c_Alphaproteobacteria:o_Rhodospirillales:f_:g__                               |
| MID1 | denovo242 | 1   | k_Bacteria:p_Actinobacteria:c_Acidimicrobiia:o_Acidimicrobiales:f_AKIW874:g__                             |
| MID1 | denovo250 | 3   | k_Bacteria:p_Proteobacteria:c_Alphaproteobacteria:o_Rhizobiales:f_Methylocystaceae                        |
| MID1 | denovo251 | 2   | k_Bacteria:p_Cyanobacteria:c_Synechococcophycideae:o_Pseudanabaenales:f_Pseudanabaenaceae:g_Leptolyngbya  |
| MID1 | denovo256 | 1   | k_Bacteria:p_Actinobacteria:c_Actinobacteria:o_Actinomycetales:f_Propionibacteriaceae:g__                 |
| MID1 | denovo258 | 1   | k_Bacteria:p_Firmicutes:c_Clostridia:o_Clostridiales:f_Lachnospiraceae:g_Oribacterium                     |
| MID1 | denovo259 | 1   | k_Bacteria:p_Gemmatimonadetes:c_Gemmatimonadetes:o_Gemmatimonadales:f_:g__                                |
| MID1 | denovo26  | 1   | k_Bacteria:p_Proteobacteria:c_Alphaproteobacteria:o_Rhizobiales:f_Brucellaceae                            |
| MID1 | denovo262 | 2   | k_Bacteria:p_Proteobacteria:c_Alphaproteobacteria:o_Caulobacterales:f_Caulobacteraceae:g_Phenylobacterium |
| MID1 | denovo263 | 1   | k_Bacteria:p_Proteobacteria:c_Betaproteobacteria:o_Rhodocyclales:f_Rhodocyclaceae:g_Dechloromonas         |
| MID1 | denovo265 | 3   | k_Bacteria:p_Cyanobacteria:c_Oscillatorioophycideae:o_Oscillatoriales:f_Phormidiaceae                     |
| MID1 | denovo266 | 2   | k_Bacteria:p_Proteobacteria:c_Alphaproteobacteria:o_Sphingomonadales:f_Erythrobacteraceae                 |
| MID1 | denovo268 | 1   | k_Bacteria:p_Actinobacteria:c_Actinobacteria:o_Actinomycetales:f_Microbacteriaceae:g_Agrococcus           |
| MID1 | denovo272 | 8   | k_Bacteria:p_Proteobacteria:c_Alphaproteobacteria:o_Rhodobacterales:f_Rhodobacteraceae:g_Rubellimicrobium |
| MID1 | denovo276 | 1   | k_Bacteria:p_Actinobacteria:c_Actinobacteria:o_Actinomycetales:f_:g__                                     |
| MID1 | denovo279 | 1   | k_Bacteria:p_Proteobacteria:c_Gammaproteobacteria:o_Xanthomonadales:f_Xanthomonadaceae:g__                |
| MID1 | denovo28  | 1   | k_Bacteria:p_Proteobacteria:c_Alphaproteobacteria:o_Caulobacterales:f_Caulobacteraceae:g__                |
| MID1 | denovo280 | 2   | k_Bacteria:p_Firmicutes:c_Clostridia:o_Clostridiales:f_Clostridiaceae:g_Alkaliphilus                      |
| MID1 | denovo283 | 1   | k_Bacteria:p_Firmicutes:c_Clostridia:o_Clostridiales:f_Peptostreptococcaceae:g_Tepidibacter               |
| MID1 | denovo286 | 1   | k_Bacteria:p_Actinobacteria:c_Actinobacteria:o_Actinomycetales:f_Frankiaceae:g__                          |
| MID1 | denovo287 | 5   | k_Bacteria:p_Bacteroidetes:c_Flavobacteriia:o_Flavobacteriales:f_Flavobacteriaceae:g_Arenibacter          |
| MID1 | denovo288 | 4   | k_Bacteria:p_Proteobacteria:c_Alphaproteobacteria:o_Caulobacterales:f_Caulobacteraceae:g__                |
| MID1 | denovo290 | 2   | k_Bacteria:p_Proteobacteria:c_Alphaproteobacteria:o_Sphingomonadales:f_Sphingomonadaceae:g__              |
| MID1 | denovo291 | 2   | k_Bacteria:p_Proteobacteria:c_Betaproteobacteria:o_Burkholderiales:f_Comamonadaceae:g_Delftia             |
| MID1 | denovo293 | 1   | k_Bacteria:p_Acidobacteria:c_Solibacteres:o_Solibacterales:f_:g__                                         |
| MID1 | denovo294 | 1   | k_Bacteria:p_Firmicutes:c_Clostridia:o_Clostridiales:f_[Tissierellaceae]:g_Peptoniphilus                  |
| MID1 | denovo296 | 3   | k_Bacteria:p_Firmicutes:c_Clostridia:o_Clostridiales:f_[Tissierellaceae]:g_WAL_1855D                      |
| MID1 | denovo3   | 1   | k_Bacteria:p_Armatimonadetes:c_Armatimonadia:o_Armatimonadales:f_Armatimonadaceae:g__                     |
| MID1 | denovo30  | 4   | k_Bacteria:p_Actinobacteria:c_Actinobacteria:o_Actinomycetales:f_Bogoriellaceae:g_Georgenia               |
| MID1 | denovo301 | 2   | k_Bacteria:p_Bacteroidetes:c_Bacteroidia:o_Bacteroidales:f_Porphyrimonadaceae:g__                         |
| MID1 | denovo302 | 1   | k_Bacteria:p_Proteobacteria:c_Alphaproteobacteria:o_Rhizobiales:f_Aurantimonadaceae:g__                   |
| MID1 | denovo308 | 1   | k_Bacteria:p_Bacteroidetes:c_Cytophagia:o_Cytophagales:f_Cyclobacteriaceae:g__                            |
| MID1 | denovo309 | 1   | k_Bacteria:p_Actinobacteria:c_Acidimicrobiia:o_Acidimicrobiales:f_C111:g__                                |
| MID1 | denovo310 | 1   | k_Bacteria:p_Cyanobacteria:c_Synechococcophycideae:o_Pseudanabaenales:f_Pseudanabaenaceae:g_Leptolyngbya  |
| MID1 | denovo311 | 1   | k_Bacteria:p_Chloroflexi:c_Gitt-GS-136:o_f_:g__                                                           |
| MID1 | denovo312 | 1   | k_Bacteria:p_Proteobacteria:c_Alphaproteobacteria:o_Rhodobacterales:f_Rhodobacteraceae:g_Rubellimicrobium |
| MID1 | denovo314 | 1   | k_Bacteria:p_Proteobacteria:c_Alphaproteobacteria:o_Rhizobiales:f_Beijerinckiaceae:g__                    |
| MID1 | denovo315 | 6   | k_Bacteria:p_Proteobacteria:c_Alphaproteobacteria:o_Rhizobiales:f_Rhizobiaceae:g_Rhizobium                |
| MID1 | denovo317 | 2   | k_Bacteria:p_Actinobacteria:c_Acidimicrobiia:o_Acidimicrobiales:f_:g__                                    |
| MID1 | denovo318 | 2   | k_Bacteria:p_Cyanobacteria:c_Oscillatorioophycideae:o_Chroococcales:f_Xenococcaceae:g__                   |
| MID1 | denovo319 | 3   | k_Bacteria:p_Bacteroidetes:c_Flavobacteriia:o_Flavobacteriales:f_[Weeksellaceae]:g_Chryseobacterium       |
| MID1 | denovo32  | 1   | k_Bacteria:p_Gemmatimonadetes:c_Gemmatimonadetes:o_Gemmatimonadales:f_:g__                                |
| MID1 | denovo320 | 3   | k_Bacteria:p_Gemmatimonadetes:c_Gemmatimonadetes:o_Gemmatimonadales:f_:g__                                |
| MID1 | denovo323 | 1   | k_Bacteria:p_Proteobacteria:c_Gammaproteobacteria:o_Pseudomonadales:f_Pseudomonadaceae:g_Pseudomonas      |
| MID1 | denovo324 | 5   | k_Bacteria:p_Proteobacteria:c_Alphaproteobacteria:o_Rhizobiales:f_Hyphomicrobiaceae:g_Devosia             |
| MID1 | denovo326 | 2   | k_Bacteria:p_Bacteroidetes:c_Cytophagia:o_Cytophagales:f_Flammeovirgaceae:g__                             |
| MID1 | denovo327 | 1   | k_Bacteria:p_Actinobacteria:c_Actinobacteria:o_Actinomycetales:f_Pseudonocardiaceae:g_Pseudonocardia      |
| MID1 | denovo329 | 1   | k_Bacteria:p_Acidobacteria:c_Acidobacteriia:o_Acidobacteriales:f_Acidobacteriaceae:g__                    |
| MID1 | denovo33  | 1   | k_Bacteria:p_Proteobacteria:c_Gammaproteobacteria:o_Xanthomonadales:f_Xanthomonadaceae:g_Lysobacter       |
| MID1 | denovo335 | 4   | k_Bacteria:p_Actinobacteria:c_Actinobacteria:o_Actinomycetales:f_Micrococcaceae:g_Arthrobacter            |
| MID1 | denovo336 | 1   | Unassigned                                                                                                |
| MID1 | denovo338 | 16  | k_Bacteria:p_Proteobacteria:c_Alphaproteobacteria:o_Rhodobacterales:f_Rhodobacteraceae:g_Paracoccus       |
| MID1 | denovo34  | 26  | k_Bacteria:p_Proteobacteria:c_Gammaproteobacteria:o_Xanthomonadales:f_Xanthomonadaceae:g_Dokdonella       |
| MID1 | denovo343 | 3   | k_Bacteria:p_Proteobacteria:c_Betaproteobacteria:o_Burkholderiales:f_Comamonadaceae:g__                   |
| MID1 | denovo344 | 2   | k_Bacteria:p_Proteobacteria:c_Gammaproteobacteria:o_Xanthomonadales:f_Xanthomonadaceae:g__                |
| MID1 | denovo347 | 1   | k_Bacteria:p_Cyanobacteria:c_Oscillatorioophycideae:o_Chroococcales:f_Xenococcaceae:g__                   |
| MID1 | denovo352 | 1   | k_Bacteria:p_Cyanobacteria:c_Nostocophycideae:o_Nostocales:f_Nostocaceae:g_Nostoc                         |
| MID1 | denovo353 | 40  | k_Bacteria:p_Proteobacteria:c_Alphaproteobacteria:o_Rhodobacterales:f_Rhodobacteraceae:g_Rubellimicrobium |
| MID1 | denovo354 | 1   | k_Bacteria:p_[Thermi]:c_Deinococci:o_Deinococcales:f_Deinococcaceae:g_Deinococcus                         |
| MID1 | denovo356 | 1   | k_Bacteria:p_Proteobacteria:c_Gammaproteobacteria:o_Alteromonadales:f_:g__                                |

|      |           |    |                                                                                                                |
|------|-----------|----|----------------------------------------------------------------------------------------------------------------|
| MID1 | denovo358 | 1  | k_Bacteria:p__Proteobacteria:c__Alphaproteobacteria:o__Rhizobiales:f__Methylobacteriaceae:g__Methylobacterium  |
| MID1 | denovo36  | 1  | k_Bacteria:p__Proteobacteria:c__Alphaproteobacteria:o__Rhizobiales:f__Hyphomicrobiaceae:g__                    |
| MID1 | denovo361 | 2  | k_Bacteria:p__Firmicutes:c__Bacilli:o__Lactobacillales:f__Lactobacillaceae:g__Lactobacillus                    |
| MID1 | denovo364 | 2  | k_Bacteria:p__Cyanobacteria:c__Chloroplast:o__Chlorophyta:f__g__                                               |
| MID1 | denovo366 | 17 | k_Bacteria:p__Proteobacteria:c__Alphaproteobacteria:o__Rhodobacterales:f__Rhodobacteraceae:g__                 |
| MID1 | denovo368 | 1  | k_Bacteria:p__Actinobacteria:c__Actinobacteria:o__Actinomycetales:f__g__                                       |
| MID1 | denovo369 | 2  | k_Bacteria:p__Proteobacteria:c__Deltaproteobacteria:o__Myxococcales:f__g__                                     |
| MID1 | denovo371 | 1  | k_Bacteria:p__Firmicutes:c__Clostridia:o__Clostridiales:f__g__                                                 |
| MID1 | denovo372 | 2  | k_Bacteria:p__Proteobacteria:c__Alphaproteobacteria:o__Sphingomonadales:f__Sphingomonadaceae:g__Zymomonas      |
| MID1 | denovo373 | 1  | k_Bacteria:p__Proteobacteria:c__Betaproteobacteria:o__Burkholderiales:f__Alcaligenaceae:g__                    |
| MID1 | denovo374 | 6  | k_Bacteria:p__Actinobacteria:c__Actinobacteria:o__Actinomycetales:f__Microbacteriaceae:g__Cryocola             |
| MID1 | denovo375 | 1  | k_Bacteria:p__Acidobacteria:c__[Chloracidobacteria]:o__RB41:f__Ellin6075:g__                                   |
| MID1 | denovo377 | 1  | k_Bacteria:p__Actinobacteria:c__Actinobacteria:o__Actinomycetales:f__Nocardioideaceae:g__Propionimiconas       |
| MID1 | denovo382 | 1  | k_Bacteria:p__FBP:c__o__f__g__                                                                                 |
| MID1 | denovo384 | 6  | k_Bacteria:p__Fusobacteria:c__Fusobacteriia:o__Fusobacteriales:f__Fusobacteriaceae:g__Fusobacterium            |
| MID1 | denovo386 | 1  | k_Bacteria:p__Chloroflexi:c__Anaerolineae:o__Anaerolineales:f__Anaerolineaceae:g__Anaerolinea                  |
| MID1 | denovo389 | 2  | k_Bacteria:p__Proteobacteria:c__Alphaproteobacteria:o__Rhizobiales:f__Methylocystaceae:g__                     |
| MID1 | denovo390 | 7  | k_Bacteria:p__Actinobacteria:c__Actinobacteria:o__Actinomycetales:f__Microbacteriaceae:g__Frigoribacterium     |
| MID1 | denovo392 | 1  | k_Bacteria:p__Proteobacteria:c__Alphaproteobacteria:o__Rhodospirillales:f__Acetobacteraceae:g__                |
| MID1 | denovo393 | 19 | k_Bacteria:p__Proteobacteria:c__Gammaproteobacteria:o__Xanthomonadales:f__Xanthomonadaceae:g__Lysobacter       |
| MID1 | denovo394 | 1  | k_Bacteria:p__Proteobacteria:c__Betaproteobacteria:o__Gallionellales:f__Gallionellaceae:g__Gallionella         |
| MID1 | denovo395 | 4  | k_Bacteria:p__Proteobacteria:c__Alphaproteobacteria:o__Rhodospirillales:f__Acetobacteraceae:g__                |
| MID1 | denovo396 | 3  | k_Bacteria:p__Proteobacteria:c__Deltaproteobacteria:o__Myxococcales:f__Polyangiaceae:g__                       |
| MID1 | denovo397 | 1  | k_Bacteria:p__Actinobacteria:c__Acidimicrobiia:o__Acidimicrobiales:f__EB1017:g__                               |
| MID1 | denovo398 | 1  | k_Bacteria:p__Bacteroidetes:c__Cytophagia:o__Cytophagales:f__Cytophagaceae:g__Rhodocytophaga                   |
| MID1 | denovo399 | 1  | k_Bacteria:p__Proteobacteria:c__Deltaproteobacteria:o__Myxococcales:f__g__                                     |
| MID1 | denovo4   | 1  | k_Bacteria:p__Armatimonadetes:c__Armatimonadia:o__Armatimonadales:f__Armatimonadaceae:g__                      |
| MID1 | denovo400 | 1  | k_Bacteria:p__Proteobacteria:c__Alphaproteobacteria:o__Rhizobiales:f__Methylobacteriaceae:g__Methylobacterium  |
| MID1 | denovo401 | 1  | k_Bacteria:p__Proteobacteria:c__Deltaproteobacteria:o__Myxococcales:f__g__                                     |
| MID1 | denovo404 | 9  | k_Bacteria:p__Firmicutes:c__Bacilli:o__Lactobacillales:f__Enterococcaceae:g__Enterococcus                      |
| MID1 | denovo405 | 1  | k_Bacteria:p__Planctomycetes:c__Planctomycetia:o__Gemmatales:f__Gemmataceae:g__Gemmata                         |
| MID1 | denovo406 | 1  | k_Bacteria:p__Proteobacteria:c__Alphaproteobacteria:o__Sphingomonadales:f__Sphingomonadaceae:g__Sphingobium    |
| MID1 | denovo409 | 3  | k_Bacteria:p__Actinobacteria:c__Actinobacteria:o__Actinomycetales:f__Nakamurellaceae:g__                       |
| MID1 | denovo41  | 1  | k_Bacteria:p__Proteobacteria:c__Alphaproteobacteria:o__Sphingomonadales:f__Sphingomonadaceae:g__               |
| MID1 | denovo411 | 1  | k_Bacteria:p__Proteobacteria:c__Betaproteobacteria:o__Neisseriales:f__Neisseriaceae:g__                        |
| MID1 | denovo413 | 1  | k_Bacteria:p__Bacteroidetes:c__Cytophagia:o__Cytophagales:f__Cytophagaceae:g__                                 |
| MID1 | denovo414 | 1  | k_Bacteria:p__Proteobacteria:c__Alphaproteobacteria:o__Caulobacteriales:f__Caulobacteraceae:g__                |
| MID1 | denovo415 | 1  | k_Bacteria:p__Cyanobacteria:c__Synechococcophycideae:o__Pseudanabaenales:f__Pseudanabaenaceae:g__Leptolyngbya  |
| MID1 | denovo416 | 1  | k_Bacteria:p__Bacteroidetes:c__Bacteroidia:o__Bacteroidales:f__Porphyromonadaceae:g__Candidatus_Azobacteroides |
| MID1 | denovo417 | 1  | k_Bacteria:p__Fibrobacteres:c__Fibrobacteria:o__258ds10:f__g__                                                 |
| MID1 | denovo418 | 1  | Unassigned                                                                                                     |
| MID1 | denovo419 | 1  | k_Bacteria:p__Proteobacteria:c__Alphaproteobacteria:o__Rhodospirillales:f__Rhodospirillaceae:g__Skermanella    |
| MID1 | denovo423 | 1  | k_Bacteria:p__Firmicutes:c__Clostridia:o__Clostridiales:f__g__                                                 |
| MID1 | denovo424 | 2  | k_Bacteria:p__Bacteroidetes:c__Cytophagia:o__Cytophagales:f__Cytophagaceae:g__Spirosoma                        |
| MID1 | denovo425 | 28 | k_Bacteria:p__Proteobacteria:c__Gammaproteobacteria:o__Xanthomonadales:f__Xanthomonadaceae:g__                 |
| MID1 | denovo426 | 1  | k_Bacteria:p__Bacteroidetes:c__Flavobacteriia:o__Flavobacteriales:f__Flavobacteriaceae:g__Gillisia             |
| MID1 | denovo428 | 1  | k_Bacteria:p__Proteobacteria:c__Betaproteobacteria:o__Neisseriales:f__Neisseriaceae:g__Kingella                |
| MID1 | denovo429 | 1  | k_Bacteria:p__Firmicutes:c__Clostridia:o__Clostridiales:f__Clostridiaceae:g__Clostridium                       |
| MID1 | denovo430 | 4  | k_Bacteria:p__Actinobacteria:c__Acidimicrobiia:o__Acidimicrobiales:f__Microthrixaceae:g__                      |
| MID1 | denovo431 | 3  | k_Bacteria:p__Proteobacteria:c__Alphaproteobacteria:o__Rhizobiales:f__Methylobacteriaceae:g__Methylobacterium  |
| MID1 | denovo432 | 4  | k_Bacteria:p__Cyanobacteria:c__Synechococcophycideae:o__Pseudanabaenales:f__Pseudanabaenaceae:g__Leptolyngbya  |
| MID1 | denovo434 | 1  | k_Bacteria:p__Actinobacteria:c__Actinobacteria:o__Actinomycetales:f__Microbacteriaceae:g__Microbacterium       |
| MID1 | denovo435 | 1  | k_Bacteria:p__Actinobacteria:c__Actinobacteria:o__Actinomycetales:f__Nocardiaceae:g__Rhodococcus               |
| MID1 | denovo44  | 1  | k_Bacteria:p__Bacteroidetes:c__Cytophagia:o__Cytophagales:f__Cytophagaceae:g__Hymenobacter                     |
| MID1 | denovo441 | 1  | k_Bacteria:p__Proteobacteria:c__Alphaproteobacteria:o__Rhizobiales:f__Phyllobacteriaceae:g__Aminobacter        |
| MID1 | denovo442 | 1  | k_Bacteria:p__Firmicutes:c__Clostridia:o__Clostridiales:f__g__                                                 |
| MID1 | denovo443 | 2  | k_Bacteria:p__Proteobacteria:c__Alphaproteobacteria:o__Rhizobiales:f__Bradyrhizobiaceae:g__                    |
| MID1 | denovo444 | 3  | k_Bacteria:p__Bacteroidetes:c__Bacteroidia:o__Bacteroidales:f__Porphyromonadaceae:g__Porphyromonas             |
| MID1 | denovo447 | 2  | k_Bacteria:p__Proteobacteria:c__Alphaproteobacteria:o__Rhizobiales:f__Hyphomicrobiaceae:g__Rhodoplanes         |
| MID1 | denovo45  | 2  | k_Bacteria:p__Actinobacteria:c__Actinobacteria:o__Actinomycetales:f__Kineosporiaceae:g__                       |
| MID1 | denovo451 | 13 | k_Bacteria:p__[Thermi]:c__Deinococci:o__Deinococcales:f__Trueperaceae:g__B-42                                  |
| MID1 | denovo452 | 1  | k_Bacteria:p__Proteobacteria:c__Alphaproteobacteria:o__Caulobacteriales:f__Caulobacteraceae:g__                |
| MID1 | denovo454 | 3  | k_Bacteria:p__Proteobacteria:c__Alphaproteobacteria:o__Sphingomonadales:f__Sphingomonadaceae:g__Kaistobacter   |
| MID1 | denovo455 | 1  | k_Bacteria:p__Proteobacteria:c__Gammaproteobacteria:o__Pasteurellales:f__Pasteurellaceae:g__Haemophilus        |
| MID1 | denovo456 | 4  | k_Bacteria:p__Firmicutes:c__Clostridia:o__Clostridiales:f__[Tissierellaceae]                                   |
| MID1 | denovo457 | 4  | k_Bacteria:p__Actinobacteria:c__Thermoleophila:o__Solirubrobacterales:f__g__                                   |
| MID1 | denovo458 | 1  | k_Bacteria:p__Actinobacteria:c__Actinobacteria:o__Actinomycetales:f__g__                                       |

|      |           |     |                                                                                                                 |
|------|-----------|-----|-----------------------------------------------------------------------------------------------------------------|
| MID1 | denovo459 | 3   | k__Bacteria:p__Actinobacteria:c__Actinobacteria:o__Actinomycetales:f__Propionibacteriaceae:g__                  |
| MID1 | denovo46  | 1   | k__Bacteria:p__Bacteroidetes:c__Cytophagia:o__Cytophagales:f__Cytophagaceae:g__Spirosoma                        |
| MID1 | denovo460 | 1   | k__Bacteria:p__Actinobacteria:c__Actinobacteria:o__Actinomycetales:f__Propionibacteriaceae:g__                  |
| MID1 | denovo461 | 1   | k__Bacteria:p__Actinobacteria:c__Thermoleophilla:o__Solirubrobacterales:f__g__                                  |
| MID1 | denovo462 | 1   | k__Bacteria:p__Chloroflexi:c__Thermomicrobia:o__JG30-KF-CM45:f__g__                                             |
| MID1 | denovo466 | 1   | k__Bacteria:p__Proteobacteria:c__Alphaproteobacteria:o__Rhodospirillales                                        |
| MID1 | denovo469 | 1   | k__Bacteria:p__Firmicutes:c__Clostridia:o__Clostridiales:f__Ruminococcaceae:g__                                 |
| MID1 | denovo471 | 2   | k__Bacteria:p__Proteobacteria:c__Alphaproteobacteria:o__Rhizobiales:f__Hyphomicrobiaceae:g__Devosia             |
| MID1 | denovo473 | 2   | k__Bacteria:p__Firmicutes:c__Clostridia:o__Clostridiales:f__Christensenellaceae:g__                             |
| MID1 | denovo474 | 1   | Unassigned                                                                                                      |
| MID1 | denovo477 | 1   | k__Bacteria:p__Bacteroidetes:c__Bacteroidia:o__Bacteroidales:f__Prevotellaceae:g__Prevotella                    |
| MID1 | denovo479 | 1   | k__Bacteria:p__Proteobacteria:c__Alphaproteobacteria:o__Caulobacterales:f__Caulobacteraceae                     |
| MID1 | denovo49  | 2   | k__Bacteria:p__Planctomycetes:c__Planctomycetia:o__Pirellulales:f__Pirellulaceae:g__                            |
| MID1 | denovo491 | 4   | k__Bacteria:p__Proteobacteria:c__Deltaproteobacteria:o__Myxococcales:f__Haliangiaceae:g__                       |
| MID1 | denovo492 | 65  | k__Bacteria:p__Cyanobacteria:c__Oscillatoriophyceidae:o__Chroococcales:f__Xenococcaceae:g__Chroococcidiopsis    |
| MID1 | denovo496 | 1   | k__Bacteria:p__Chloroflexi:c__Anaerolineae:o__SBR1031:f__A4b_g__                                                |
| MID1 | denovo497 | 1   | k__Bacteria:p__Proteobacteria:c__Alphaproteobacteria:o__Rhizobiales:f__Hyphomicrobiaceae:g__Devosia             |
| MID1 | denovo498 | 5   | k__Bacteria:p__Proteobacteria:c__Betaproteobacteria:o__Burkholderiales:f__g__                                   |
| MID1 | denovo5   | 5   | k__Bacteria:p__Proteobacteria:c__Alphaproteobacteria:o__Rhodobacterales:f__Rhodobacteraceae:g__Rubellimicrobium |
| MID1 | denovo50  | 1   | Unassigned                                                                                                      |
| MID1 | denovo501 | 1   | k__Bacteria:p__Actinobacteria:c__Actinobacteria:o__Actinomycetales:f__Nocardioidaceae:g__Propionimonas          |
| MID1 | denovo502 | 2   | k__Bacteria:p__Firmicutes:c__Bacilli:o__Lactobacillales:f__Leuconostocaceae:g__Leuconostoc                      |
| MID1 | denovo504 | 1   | k__Bacteria:p__Proteobacteria:c__Alphaproteobacteria:o__Rhodospirillales:f__Rhodospirillaceae:g__               |
| MID1 | denovo508 | 1   | k__Bacteria:p__Bacteroidetes:c__Cytophagia:o__Cytophagales:f__Cytophagaceae:g__Spirosoma                        |
| MID1 | denovo512 | 1   | k__Bacteria:p__Proteobacteria:c__Gammaproteobacteria:o__Enterobacterales:f__Enterobacteriaceae:g__Erwinia       |
| MID1 | denovo513 | 5   | k__Bacteria:p__Proteobacteria:c__Alphaproteobacteria:o__Rhizobiales:f__Aurantimonadaceae:g__                    |
| MID1 | denovo515 | 1   | k__Bacteria:p__Actinobacteria:c__Thermoleophilla:o__Gaiellales:f__Gaiellaceae:g__                               |
| MID1 | denovo516 | 4   | k__Bacteria:p__Gemmatimonadetes:c__Gemm-3:o__f__g__                                                             |
| MID1 | denovo52  | 1   | k__Bacteria:p__Proteobacteria:c__Alphaproteobacteria:o__Rhizobiales:f__Bradyrhizobiaceae:g__                    |
| MID1 | denovo520 | 1   | k__Bacteria:p__Acidobacteria:c__[Chloracidobacteria]:o__RB41:f__Ellin6075:g__                                   |
| MID1 | denovo522 | 1   | k__Bacteria:p__Proteobacteria:c__Deltaproteobacteria:o__Syntrophobacterales:f__Syntrophobacteraceae:g__         |
| MID1 | denovo524 | 2   | k__Bacteria:p__Acidobacteria:c__[Chloracidobacteria]:o__RB41:f__Ellin6075:g__                                   |
| MID1 | denovo525 | 1   | k__Bacteria:p__Actinobacteria:c__Actinobacteria:o__Actinomycetales:f__Geodermatophilaceae:g__Modestobacter      |
| MID1 | denovo526 | 1   | k__Bacteria:p__Proteobacteria:c__Alphaproteobacteria:o__Rhizobiales:f__Beijerinckiaceae:g__                     |
| MID1 | denovo527 | 50  | k__Bacteria:p__Proteobacteria:c__Alphaproteobacteria:o__Rhodobacterales:f__Rhodobacteraceae:g__                 |
| MID1 | denovo529 | 1   | k__Bacteria:p__Proteobacteria:c__Alphaproteobacteria:o__Sphingomonadales:f__Sphingomonadaceae                   |
| MID1 | denovo53  | 1   | k__Bacteria:p__Proteobacteria:c__Alphaproteobacteria:o__Rhizobiales:f__Hyphomicrobiaceae:g__Devosia             |
| MID1 | denovo530 | 3   | k__Bacteria:p__Firmicutes:c__Bacilli:o__Lactobacillales:f__Lactobacillaceae:g__Lactobacillus                    |
| MID1 | denovo531 | 1   | k__Bacteria:p__Proteobacteria:c__Gammaproteobacteria:o__Xanthomonadales:f__Xanthomonadaceae:g__                 |
| MID1 | denovo533 | 1   | k__Bacteria:p__Actinobacteria:c__Actinobacteria:o__Actinomycetales:f__Cellulomonadaceae:g__Demequina            |
| MID1 | denovo535 | 1   | k__Bacteria:p__Proteobacteria:c__Alphaproteobacteria:o__Caulobacterales:f__Caulobacteraceae:g__                 |
| MID1 | denovo537 | 3   | k__Bacteria:p__Firmicutes:c__Clostridia:o__Clostridiales:f__Clostridiaceae:g__Proteiniclasticum                 |
| MID1 | denovo540 | 123 | k__Bacteria:p__Firmicutes:c__Bacilli:o__Bacillales:f__Bacillaceae:g__Bacillus                                   |
| MID1 | denovo542 | 9   | k__Bacteria:p__Firmicutes:c__Clostridia:o__Clostridiales:f__[Tissierellaceae]:g__Finegoldia                     |
| MID1 | denovo543 | 1   | k__Bacteria:p__Firmicutes:c__Bacilli:o__Bacillales:f__Planococcaceae                                            |
| MID1 | denovo546 | 1   | k__Bacteria:p__Armatimonadetes:c__Armatimonadia:o__FW68:f__g__                                                  |
| MID1 | denovo547 | 1   | k__Bacteria:p__Proteobacteria:c__Alphaproteobacteria:o__Rhizobiales:f__Phyllobacteriaceae:g__                   |
| MID1 | denovo548 | 1   | k__Bacteria:p__Firmicutes:c__Clostridia:o__Clostridiales:f__Lachnospiraceae:g__                                 |
| MID1 | denovo551 | 16  | k__Bacteria:p__Proteobacteria:c__Gammaproteobacteria:o__Alteromonadales:f__Alteromonadaceae:g__Marinobacter     |
| MID1 | denovo554 | 1   | k__Bacteria:p__Proteobacteria:c__Betaproteobacteria:o__Burkholderiales:f__Comamonadaceae:g__                    |
| MID1 | denovo56  | 3   | k__Bacteria:p__Proteobacteria:c__Alphaproteobacteria:o__Rhodobacterales:f__Rhodobacteraceae:g__Rubellimicrobium |
| MID1 | denovo560 | 1   | k__Bacteria:p__Actinobacteria:c__Acidimicrobia:o__Acidimicrobiales:f__g__                                       |
| MID1 | denovo562 | 1   | k__Bacteria:p__Actinobacteria:c__Thermoleophilla:o__Solirubrobacterales:f__g__                                  |
| MID1 | denovo563 | 1   | k__Bacteria:p__Bacteroidetes:c__Flavobacteriia:o__Flavobacteriales:f__Cryomorphaceae:g__Cryomorpha              |
| MID1 | denovo57  | 2   | k__Bacteria:p__Proteobacteria:c__Alphaproteobacteria:o__Sphingomonadales:f__Sphingomonadaceae                   |
| MID1 | denovo571 | 1   | k__Bacteria:p__Proteobacteria:c__Alphaproteobacteria:o__Rhizobiales:f__Hyphomicrobiaceae:g__                    |
| MID1 | denovo573 | 1   | k__Bacteria:p__Bacteroidetes:c__Cytophagia:o__Cytophagales:f__Cytophagaceae:g__                                 |
| MID1 | denovo574 | 1   | k__Bacteria:p__Proteobacteria:c__Alphaproteobacteria:o__Rhizobiales:f__Methylocystaceae:g__                     |
| MID1 | denovo575 | 2   | k__Bacteria:p__Actinobacteria:c__Thermoleophilla:o__Gaiellales:f__g__                                           |
| MID1 | denovo576 | 3   | k__Bacteria:p__Firmicutes:c__Bacilli:o__Lactobacillales:f__Aerococcaceae:g__Facklamia                           |
| MID1 | denovo579 | 1   | k__Bacteria:p__Bacteroidetes:c__Cytophagia:o__Cytophagales:f__Cytophagaceae:g__Spirosoma                        |
| MID1 | denovo58  | 1   | k__Bacteria:p__Firmicutes:c__Bacilli:o__Lactobacillales:f__Lactobacillaceae:g__Lactobacillus                    |
| MID1 | denovo580 | 1   | k__Bacteria:p__Proteobacteria:c__Alphaproteobacteria:o__Sphingomonadales:f__Sphingomonadaceae                   |
| MID1 | denovo581 | 1   | k__Bacteria:p__Bacteroidetes:c__Flavobacteriia:o__Flavobacteriales:f__[Weeksellaceae]:g__Chryseobacterium       |
| MID1 | denovo582 | 2   | k__Bacteria:p__Proteobacteria:c__Alphaproteobacteria:o__Sphingomonadales:f__Sphingomonadaceae:g__Kaistobacter   |
| MID1 | denovo583 | 24  | k__Bacteria:p__Proteobacteria:c__Betaproteobacteria:o__Burkholderiales:f__Comamonadaceae:g__                    |
| MID1 | denovo584 | 3   | k__Bacteria:p__Actinobacteria:c__Acidimicrobia:o__Acidimicrobiales:f__Microthrixaceae:g__                       |

|      |           |    |                                                                                                                   |
|------|-----------|----|-------------------------------------------------------------------------------------------------------------------|
| MID1 | denovo585 | 1  | k_Bacteria:p__Proteobacteria:c__Alphaproteobacteria:o__Rhizobiales:f__Hyphomicrobiaceae:g__Hyphomicrobium         |
| MID1 | denovo586 | 1  | k_Bacteria:p__Planctomycetes:c__Planctomycetia:o__Gemmatales:f__Isosphaeraceae:g__                                |
| MID1 | denovo587 | 1  | k_Bacteria:p__Cyanobacteria:c__Nostocophycideae                                                                   |
| MID1 | denovo589 | 1  | k_Bacteria:p__Proteobacteria:c__Alphaproteobacteria:o__Rhodospirillales:f__Acetobacteraceae                       |
| MID1 | denovo592 | 20 | k_Bacteria:p__Firmicutes:c__Clostridia:o__Clostridiales:f__Clostridiaceae:g__                                     |
| MID1 | denovo593 | 5  | k_Bacteria:p__Actinobacteria:c__Actinobacteria:o__Actinomycetales:f__g__                                          |
| MID1 | denovo596 | 2  | k_Bacteria:p__Firmicutes:c__Bacilli:o__Bacillales:f__Bacillaceae:g__Geobacillus                                   |
| MID1 | denovo597 | 1  | k_Bacteria:p__Gemmatimonadetes:c__Gemmatimonadetes:o__Gemmatimonadales:f__g__                                     |
| MID1 | denovo598 | 6  | k_Bacteria:p__Proteobacteria:c__Betaproteobacteria:o__Burkholderiales:f__Comamonadaceae:g__                       |
| MID1 | denovo6   | 7  | k_Bacteria:p__Proteobacteria:c__Alphaproteobacteria:o__Rhodobacterales:f__Rhodobacteraceae:g__Rhodobacter         |
| MID1 | denovo60  | 2  | k_Bacteria:p__Proteobacteria:c__Alphaproteobacteria:o__Sphingomonadales:f__Sphingomonadaceae:g__                  |
| MID1 | denovo600 | 28 | k_Bacteria:p__Cyanobacteria:c__Oscillatoriothyraceae:o__Oscillatoriales:f__Phormidiaceae:g__Phormidium            |
| MID1 | denovo605 | 9  | k_Bacteria:p__Firmicutes:c__Bacilli:o__Gemellales:f__Gemellaceae:g__Gemella                                       |
| MID1 | denovo607 | 3  | Unassigned                                                                                                        |
| MID1 | denovo609 | 36 | k_Bacteria:p__Actinobacteria:c__Actinobacteria:o__Actinomycetales:f__Intrasporangiaceae:g__                       |
| MID1 | denovo611 | 1  | k_Bacteria:p__Cyanobacteria:c__Synechococcophycideae:o__Pseudanabaenales:f__Pseudanabaenaceae:g__Leptolyngbya     |
| MID1 | denovo614 | 1  | k_Bacteria:p__Acidobacteria:c__[Chloracidobacteria]:o__RB41:f__g__                                                |
| MID1 | denovo615 | 1  | k_Bacteria:p__Firmicutes:c__Clostridia:o__Clostridiales:f__Clostridiaceae:g__Clostridium                          |
| MID1 | denovo617 | 2  | k_Bacteria:p__Proteobacteria:c__Betaproteobacteria:o__Burkholderiales:f__Alcaligenaceae:g__                       |
| MID1 | denovo619 | 5  | k_Bacteria:p__Actinobacteria:c__Acidimicrobia:o__Acidimicrobiales:f__g__                                          |
| MID1 | denovo62  | 7  | k_Bacteria:p__Proteobacteria:c__Alphaproteobacteria:o__Sphingomonadales:f__Sphingomonadaceae:g__Sphingomonas      |
| MID1 | denovo621 | 3  | k_Bacteria:p__Proteobacteria:c__Alphaproteobacteria:o__Caulobacterales:f__Caulobacteraceae:g__                    |
| MID1 | denovo624 | 11 | k_Bacteria:p__Proteobacteria:c__Gammaproteobacteria:o__Xanthomonadales:f__Xanthomonadaceae:g__                    |
| MID1 | denovo625 | 1  | k_Bacteria:p__Bacteroidetes:c__Cytophagia:o__Cytophagales:f__Cytophagaceae:g__Dyadobacter                         |
| MID1 | denovo626 | 4  | k_Bacteria:p__Cyanobacteria:c__Oscillatoriothyraceae:o__Chroococcales:f__g__                                      |
| MID1 | denovo627 | 5  | k_Bacteria:p__Actinobacteria:c__Actinobacteria:o__Actinomycetales:f__Propionibacteriaceae:g__                     |
| MID1 | denovo628 | 1  | k_Bacteria:p__Proteobacteria:c__Gammaproteobacteria:o__Xanthomonadales:f__Xanthomonadaceae:g__Arenimonas          |
| MID1 | denovo629 | 2  | k_Bacteria:p__Proteobacteria:c__Alphaproteobacteria:o__Rhizobiales:f__Methylocystaceae:g__                        |
| MID1 | denovo63  | 7  | k_Bacteria:p__Firmicutes:c__Bacilli:o__Lactobacillales:f__Lactobacillaceae:g__Lactobacillus                       |
| MID1 | denovo637 | 2  | k_Bacteria:p__Cyanobacteria:c__Nostocophycideae:o__Nostocales:f__Nostocaceae                                      |
| MID1 | denovo639 | 2  | k_Bacteria:p__Actinobacteria:c__Actinobacteria:o__Actinomycetales:f__Geodermatophilaceae:g__Modestobacter         |
| MID1 | denovo64  | 2  | k_Bacteria:p__Proteobacteria:c__Betaproteobacteria:o__Burkholderiales:f__Comamonadaceae                           |
| MID1 | denovo641 | 1  | k_Bacteria:p__Acidobacteria:c__Solibacteres:o__Solibacterales:f__g__                                              |
| MID1 | denovo643 | 1  | k_Bacteria:p__Proteobacteria:c__Alphaproteobacteria:o__Sphingomonadales:f__Sphingomonadaceae:g__Kaistobacter      |
| MID1 | denovo647 | 1  | k_Bacteria:p__Proteobacteria:c__Alphaproteobacteria:o__f__g__                                                     |
| MID1 | denovo649 | 1  | k_Bacteria:p__Cyanobacteria:c__Synechococcophycideae:o__Pseudanabaenales:f__Pseudanabaenaceae:g__Leptolyngbya     |
| MID1 | denovo65  | 3  | k_Bacteria:p__Firmicutes:c__Bacilli:o__Bacillales:f__[Exiguobacteraceae]:g__Exiguobacterium                       |
| MID1 | denovo653 | 1  | k_Bacteria:p__Proteobacteria:c__Alphaproteobacteria:o__Rhizobiales:f__Bradyrhizobiaceae:g__                       |
| MID1 | denovo654 | 5  | k_Bacteria:p__Proteobacteria:c__Betaproteobacteria:o__Burkholderiales                                             |
| MID1 | denovo655 | 3  | k_Bacteria:p__Firmicutes:c__Clostridia:o__Clostridiales:f__[Tissierellaceae]:g__Anaerococcus                      |
| MID1 | denovo657 | 2  | k_Bacteria:p__Proteobacteria:c__Alphaproteobacteria:o__Rhodospirillales:f__Acetobacteraceae:g__                   |
| MID1 | denovo658 | 1  | k_Bacteria:p__Actinobacteria:c__Actinobacteria:o__Actinomycetales:f__Pseudonocardia:ceae:g__Pseudonocardia        |
| MID1 | denovo661 | 7  | k_Bacteria:p__Actinobacteria:c__Actinobacteria:o__Actinomycetales:f__g__                                          |
| MID1 | denovo662 | 1  | k_Bacteria:p__Bacteroidetes:c__Bacteroidia:o__Bacteroidales:f__Prevotellaceae:g__Prevotella                       |
| MID1 | denovo663 | 2  | k_Bacteria:p__Proteobacteria:c__Alphaproteobacteria:o__Rhizobiales:f__Methylobacteriaceae:g__Methylobacterium     |
| MID1 | denovo665 | 4  | k_Bacteria:p__Firmicutes:c__Bacilli:o__Lactobacillales:f__Lactobacillaceae:g__Lactobacillus                       |
| MID1 | denovo667 | 2  | k_Bacteria:p__Actinobacteria:c__Thermoleophilia:o__Solirubrobacterales:f__g__                                     |
| MID1 | denovo668 | 1  | k_Bacteria:p__Proteobacteria:c__Betaproteobacteria:o__Neisseriales:f__Neisseriaceae:g__Neisseria                  |
| MID1 | denovo674 | 3  | k_Bacteria:p__Proteobacteria:c__Alphaproteobacteria:o__Rhizobiales:f__Beijerinckiaceae:g__                        |
| MID1 | denovo675 | 1  | k_Bacteria:p__Bacteroidetes:c__Cytophagia:o__Cytophagales:f__Cytophagaceae:g__Spirosoma                           |
| MID1 | denovo676 | 1  | k_Bacteria:p__Actinobacteria:c__Actinobacteria:o__Actinomycetales:f__Cellulomonadaceae:g__Actinotalea             |
| MID1 | denovo677 | 3  | k_Bacteria:p__Cyanobacteria:c__Nostocophycideae:o__Nostocales:f__Nostocaceae:g__Nostoc                            |
| MID1 | denovo679 | 2  | k_Bacteria:p__Firmicutes:c__Bacilli:o__Bacillales:f__Bacillaceae:g__Bacillus                                      |
| MID1 | denovo68  | 1  | k_Bacteria:p__Proteobacteria:c__Alphaproteobacteria:o__Rhizobiales:f__Hyphomicrobiaceae:g__Rhodoplanes            |
| MID1 | denovo680 | 1  | k_Bacteria:p__Bacteroidetes:c__Bacteroidia:o__Bacteroidales:f__g__                                                |
| MID1 | denovo681 | 8  | k_Bacteria:p__Bacteroidetes:c__Flavobacteriia:o__Flavobacteriales:f__Flavobacteriaceae:g__Aequorivita             |
| MID1 | denovo683 | 2  | k_Bacteria:p__Firmicutes:c__Clostridia:o__Clostridiales:f__Ruminococcaceae:g__                                    |
| MID1 | denovo684 | 1  | k_Bacteria:p__Acidobacteria:c__[Chloracidobacteria]:o__RB41:f__Ellin6075:g__                                      |
| MID1 | denovo685 | 1  | k_Bacteria:p__Proteobacteria:c__TA18:o__CV90:f__g__                                                               |
| MID1 | denovo686 | 1  | k_Bacteria:p__Proteobacteria:c__Deltaproteobacteria:o__Spirobacillales:f__g__                                     |
| MID1 | denovo69  | 1  | k_Bacteria:p__Proteobacteria:c__Alphaproteobacteria:o__Rhodobacterales:f__Rhodobacteraceae:g__                    |
| MID1 | denovo690 | 1  | k_Bacteria:p__Proteobacteria:c__Epsilonproteobacteria:o__Campylobacterales:f__Campylobacteraceae:g__Campylobacter |
| MID1 | denovo691 | 2  | k_Bacteria:p__Gemmatimonadetes:c__Gemmatimonadetes:o__Gemmatimonadales:f__Gemmatimonadaceae:g__Gemmatimonas       |
| MID1 | denovo696 | 1  | k_Bacteria:p__Actinobacteria:c__Actinobacteria:o__Actinomycetales:f__Propionibacteriaceae:g__Propionibacterium    |
| MID1 | denovo697 | 1  | k_Bacteria:p__Proteobacteria:c__Alphaproteobacteria:o__Rhodospirillales:f__Acetobacteraceae:g__                   |
| MID1 | denovo699 | 36 | k_Bacteria:p__Proteobacteria:c__Alphaproteobacteria:o__Rhodospirillales:f__Acetobacteraceae:g__                   |
| MID1 | denovo7   | 1  | k_Bacteria:p__Proteobacteria:c__Alphaproteobacteria:o__Sphingomonadales:f__Sphingomonadaceae:g__                  |

|      |           |     |                                                                                                                 |
|------|-----------|-----|-----------------------------------------------------------------------------------------------------------------|
| MID1 | denovo70  | 4   | k__Bacteria:p__Cyanobacteria:c__Nostocophycideae:o__Nostocales:f__Nostocaceae:g__Cylindrospermopsis             |
| MID1 | denovo701 | 1   | k__Bacteria:p__Proteobacteria:c__Alphaproteobacteria:o__Rhodospirillales:f__Acetobacteraceae:g__Roseomonas      |
| MID1 | denovo702 | 1   | k__Bacteria:p__Firmicutes:c__Clostridia:o__Clostridiales:f__Lachnospiraceae:g__Coprococcus                      |
| MID1 | denovo703 | 1   | k__Bacteria:p__Firmicutes:c__Bacilli:o__Bacillales:f__Staphylococcaceae:g__Macrococcus                          |
| MID1 | denovo704 | 2   | k__Bacteria:p__Cyanobacteria:c__Nostocophycideae:o__Nostocales:f__Nostocaceae:g__                               |
| MID1 | denovo705 | 1   | k__Bacteria:p__Firmicutes:c__Bacilli:o__Bacillales:f__Planococcaceae:g__                                        |
| MID1 | denovo707 | 1   | k__Bacteria:p__Bacteroidetes:c__Bacteroidia:o__Bacteroidales:f__Bacteroidaceae:g__Bacteroides                   |
| MID1 | denovo708 | 17  | k__Bacteria:p__Firmicutes:c__Clostridia:o__Clostridiales:f__[Tissierellaceae]:g__                               |
| MID1 | denovo709 | 6   | k__Bacteria:p__Proteobacteria:c__Gammaproteobacteria:o__Pseudomonadales:f__Moraxellaceae:g__Enhydrobacter       |
| MID1 | denovo71  | 4   | k__Bacteria:p__Proteobacteria:c__Alphaproteobacteria:o__Rhizobiales:f__Hyphomicrobiaceae:g__Devosia             |
| MID1 | denovo716 | 1   | k__Bacteria:p__Bacteroidetes:c__Cytophagia:o__Cytophagales:f__Cytophagaceae:g__Hymenobacter                     |
| MID1 | denovo717 | 2   | k__Bacteria:p__Proteobacteria:c__Alphaproteobacteria:o__Caulobacterales:f__Caulobacteraceae:g__                 |
| MID1 | denovo718 | 2   | k__Bacteria:p__Acidobacteria:c__[Chloracidobacteria]:o__RB41:f__Ellin6075:g__                                   |
| MID1 | denovo719 | 2   | k__Bacteria:p__Firmicutes:c__Clostridia:o__Clostridiales:f__g__                                                 |
| MID1 | denovo72  | 1   | k__Bacteria:p__Proteobacteria:c__Alphaproteobacteria:o__Rhodospirillales:f__g__                                 |
| MID1 | denovo720 | 39  | k__Bacteria:p__Firmicutes:c__Bacilli:o__Lactobacillales:f__Aerococcaceae:g__Facklamia                           |
| MID1 | denovo721 | 3   | k__Bacteria:p__Bacteroidetes:c__[Saprospirae]:o__[Saprospirales]:f__Chitinophagaceae:g__                        |
| MID1 | denovo728 | 5   | k__Bacteria:p__Planctomycetes:c__Planctomycetia:o__Gemmatales:f__Isosphaeraceae:g__                             |
| MID1 | denovo729 | 1   | k__Bacteria:p__Proteobacteria:c__Alphaproteobacteria:o__Rhizobiales:f__Phyllobacteriaceae                       |
| MID1 | denovo73  | 1   | k__Bacteria:p__FBP:c__o__f__g__                                                                                 |
| MID1 | denovo730 | 1   | k__Bacteria:p__Proteobacteria:c__Alphaproteobacteria:o__BD7-3:f__g__                                            |
| MID1 | denovo733 | 5   | k__Bacteria:p__Proteobacteria:c__Gammaproteobacteria:o__Xanthomonadales:f__Xanthomonadaceae:g__                 |
| MID1 | denovo734 | 1   | k__Bacteria:p__Proteobacteria:c__Betaproteobacteria:o__Neisseriales:f__Neisseriaceae:g__Neisseria               |
| MID1 | denovo735 | 2   | k__Bacteria:p__Firmicutes:c__Clostridia:o__Clostridiales:f__Gracilbacteraceae:g__                               |
| MID1 | denovo737 | 1   | k__Bacteria:p__Proteobacteria:c__Alphaproteobacteria:o__RF32:f__g__                                             |
| MID1 | denovo738 | 1   | k__Bacteria:p__Proteobacteria:c__Alphaproteobacteria:o__Sphingomonadales:f__Erythrobacteraceae:g__              |
| MID1 | denovo74  | 1   | k__Bacteria:p__Actinobacteria:c__Actinobacteria:o__Actinomycetales:f__Corynebacteriaceae:g__Corynebacterium     |
| MID1 | denovo740 | 1   | k__Bacteria:p__Firmicutes:c__Clostridia:o__Clostridiales:f__Lachnospiraceae:g__                                 |
| MID1 | denovo743 | 1   | k__Bacteria:p__Proteobacteria:c__Gammaproteobacteria:o__Xanthomonadales:f__Xanthomonadaceae:g__                 |
| MID1 | denovo744 | 1   | k__Bacteria:p__Actinobacteria:c__Acidimicrobiia:o__Acidimicrobiales:f__C111:g__                                 |
| MID1 | denovo745 | 1   | k__Bacteria:p__Proteobacteria:c__Alphaproteobacteria:o__Sphingomonadales:f__Sphingomonadaceae:g__Sphingobium    |
| MID1 | denovo748 | 9   | k__Bacteria:p__Proteobacteria:c__Gammaproteobacteria:o__Xanthomonadales:f__Xanthomonadaceae:g__Lysobacter       |
| MID1 | denovo75  | 1   | k__Bacteria:p__Proteobacteria:c__Betaproteobacteria:o__Burkholderiales:f__Comamonadaceae:g__Comamonas           |
| MID1 | denovo753 | 2   | k__Bacteria:p__Proteobacteria:c__Alphaproteobacteria:o__Sphingomonadales:f__g__                                 |
| MID1 | denovo755 | 1   | k__Bacteria:p__Proteobacteria:c__Gammaproteobacteria:o__Xanthomonadales:f__Xanthomonadaceae:g__Dokdonella       |
| MID1 | denovo758 | 1   | k__Bacteria:p__Actinobacteria:c__Actinobacteria:o__Actinomycetales:f__g__                                       |
| MID1 | denovo759 | 2   | k__Bacteria:p__Proteobacteria:c__Alphaproteobacteria:o__Sphingomonadales:f__Sphingomonadaceae:g__Sphingomonas   |
| MID1 | denovo76  | 2   | k__Bacteria:p__Chloroflexi:c__Ellin6529:o__f__g__                                                               |
| MID1 | denovo761 | 2   | k__Bacteria:p__Proteobacteria:c__Alphaproteobacteria:o__Rhodobacterales:f__Rhodobacteraceae:g__Paracoccus       |
| MID1 | denovo762 | 1   | k__Bacteria:p__Firmicutes:c__Clostridia:o__Clostridiales:f__Veillonellaceae:g__Selenomonas                      |
| MID1 | denovo763 | 3   | k__Bacteria:p__Actinobacteria:c__Thermoleophila:o__Gaiellales:f__Gaiellaceae:g__                                |
| MID1 | denovo765 | 1   | k__Bacteria:p__Actinobacteria:c__Thermoleophila:o__Solirubrobacterales:f__g__                                   |
| MID1 | denovo766 | 3   | k__Bacteria:p__Actinobacteria:c__Actinobacteria:o__Actinomycetales:f__Microbacteriaceae:g__Agrococcus           |
| MID1 | denovo768 | 1   | k__Bacteria:p__Proteobacteria:c__Alphaproteobacteria:o__Rhizobiales:f__Hyphomicrobiaceae:g__Devosia             |
| MID1 | denovo770 | 122 | k__Bacteria:p__Cyanobacteria:c__Oscillatoriohyphyceae:o__Chroococcales:f__Xenococcaceae:g__                     |
| MID1 | denovo771 | 1   | k__Bacteria:p__Armatimonadetes:c__Armatimonadia:o__Armatimonadales:f__Armatimonadaceae:g__                      |
| MID1 | denovo772 | 1   | k__Bacteria:p__Proteobacteria:c__Alphaproteobacteria:o__Rhodobacterales:f__Rhodobacteraceae:g__                 |
| MID1 | denovo774 | 1   | k__Bacteria:p__Proteobacteria:c__Gammaproteobacteria:o__Xanthomonadales:f__Sinobacteraceae:g__                  |
| MID1 | denovo775 | 1   | k__Bacteria:p__Proteobacteria:c__Betaproteobacteria:o__Rhodocyclales:f__Rhodocyclaceae:g__Azoarcus              |
| MID1 | denovo777 | 6   | k__Bacteria:p__Firmicutes:c__Clostridia:o__Clostridiales:f__Ruminococcaceae:g__                                 |
| MID1 | denovo779 | 2   | k__Bacteria:p__Firmicutes:c__Bacilli:o__Bacillales:f__Bacillaceae:g__Bacillus                                   |
| MID1 | denovo78  | 1   | k__Bacteria:p__Actinobacteria:c__Thermoleophila:o__Solirubrobacterales:f__Conexibacteraceae:g__                 |
| MID1 | denovo780 | 2   | k__Bacteria:p__Cyanobacteria:c__ML635J-21:o__f__g__                                                             |
| MID1 | denovo781 | 1   | k__Bacteria:p__Proteobacteria:c__Alphaproteobacteria:o__Rhizobiales:f__g__                                      |
| MID1 | denovo782 | 1   | k__Bacteria:p__Proteobacteria:c__Betaproteobacteria:o__Burkholderiales:f__Oxalobacteraceae:g__                  |
| MID1 | denovo783 | 2   | k__Bacteria:p__Cyanobacteria:c__Oscillatoriohyphyceae:o__Oscillatoriales:f__Phormidiaceae:g__Phormidium         |
| MID1 | denovo785 | 30  | k__Bacteria:p__Firmicutes:c__Clostridia:o__Clostridiales:f__g__                                                 |
| MID1 | denovo786 | 10  | k__Bacteria:p__Firmicutes:c__Clostridia:o__Clostridiales                                                        |
| MID1 | denovo787 | 1   | k__Bacteria:p__Firmicutes:c__Clostridia:o__Clostridiales:f__[Mogibacteriaceae]:g__Mogibacterium                 |
| MID1 | denovo788 | 1   | k__Bacteria:p__Proteobacteria:c__Betaproteobacteria:o__Nitrosomonadales:f__Nitrosomonadaceae:g__                |
| MID1 | denovo79  | 1   | k__Bacteria:p__Firmicutes:c__Clostridia:o__Clostridiales:f__[Tissierellaceae]:g__Anaerococcus                   |
| MID1 | denovo790 | 10  | k__Bacteria:p__Cyanobacteria:c__Chloroplast:o__Streptophyta:f__g__                                              |
| MID1 | denovo791 | 28  | k__Bacteria:p__Actinobacteria:c__Acidimicrobiia:o__Acidimicrobiales:f__g__                                      |
| MID1 | denovo792 | 7   | k__Bacteria:p__Actinobacteria:c__Actinobacteria:o__Actinomycetales:f__g__                                       |
| MID1 | denovo794 | 1   | k__Bacteria:p__Gemmatimonadetes:c__Gemmatimonadetes:o__Gemmatimonadales:f__g__                                  |
| MID1 | denovo795 | 16  | k__Bacteria:p__Actinobacteria:c__Actinobacteria:o__Actinomycetales:f__g__                                       |
| MID1 | denovo796 | 3   | k__Bacteria:p__Proteobacteria:c__Alphaproteobacteria:o__Rhodobacterales:f__Rhodobacteraceae:g__Rubellimicrobium |

|      |           |    |                                                                                                           |
|------|-----------|----|-----------------------------------------------------------------------------------------------------------|
| MID1 | denovo799 | 2  | k_Bacteria:p_Firmicutes:c_Clostridia:o_Clostridiales:f_Lachnospiraceae:g_Coprococcus                      |
| MID1 | denovo80  | 1  | k_Bacteria:p_Cyanobacteria:c_Synechococcophycideae:o_Pseudanabaenales:f_Pseudanabaenaceae:g_Leptolyngbya  |
| MID1 | denovo800 | 1  | k_Bacteria:p_Armatimonadetes:c_Armatimonadia:o_Armatimonadales:f_Armatimonadaceae:g__                     |
| MID1 | denovo801 | 4  | k_Bacteria:p_Proteobacteria:c_Alphaproteobacteria:o_Rhodobacterales:f_Rhodobacteraceae:g_Rubellimicrobium |
| MID1 | denovo802 | 1  | k_Bacteria:p_Proteobacteria:c_Alphaproteobacteria:o_Rhodospirillales:f_Acetobacteraceae:g__               |
| MID1 | denovo803 | 17 | k_Bacteria:p_Actinobacteria:c_Actinobacteria:o_Actinomycetales:f_Sporichthyaceae:g__                      |
| MID1 | denovo804 | 1  | k_Bacteria:p_Proteobacteria:c_Alphaproteobacteria:o_Rickettsiales:f__g__                                  |
| MID1 | denovo806 | 2  | k_Bacteria:p_Firmicutes:c_Bacilli:o_Bacillales:f_Bacillaceae:g_Bacillus                                   |
| MID1 | denovo807 | 2  | k_Bacteria:p_Firmicutes:c_Clostridia:o_Clostridiales:f_Lachnospiraceae:g__                                |
| MID1 | denovo810 | 1  | k_Bacteria:p_Actinobacteria:c_Thermoleophilia:o_Gaiellales:f_Gaiellaceae:g__                              |
| MID1 | denovo815 | 1  | k_Bacteria:p_Firmicutes:c_Clostridia:o_Clostridiales:f_Lachnospiraceae:g__                                |
| MID1 | denovo816 | 2  | k_Bacteria:p_Firmicutes:c_Bacilli:o_Lactobacillales:f_Carnobacteriaceae:g_Desemzia                        |
| MID1 | denovo817 | 2  | k_Bacteria:p_Actinobacteria:c_Actinobacteria:o_Actinomycetales:f_Actinomycetaceae:g_Actinomycetes         |
| MID1 | denovo82  | 2  | k_Bacteria:p_Gemmatimonadetes:c_Gemmatimonadetes:o_Gemmatimonadales:f__g__                                |
| MID1 | denovo821 | 3  | k_Bacteria:p_Proteobacteria:c_Alphaproteobacteria:o_Rhizobiales:f_Methylocystaceae:g__                    |
| MID1 | denovo827 | 1  | k_Bacteria:p_Actinobacteria:c_Actinobacteria:o_Actinomycetales:f_Nocardioideae:g_Nocardioidea             |
| MID1 | denovo829 | 18 | k_Bacteria:p_Firmicutes:c_Bacilli:o_Lactobacillales:f_Carnobacteriaceae:g_Carnobacterium                  |
| MID1 | denovo830 | 3  | k_Bacteria:p_Proteobacteria:c_Alphaproteobacteria:o_Rhodobacterales:f_Rhodobacteraceae:g_Paracoccus       |
| MID1 | denovo831 | 1  | k_Bacteria:p_Actinobacteria:c_Actinobacteria:o_Actinomycetales:f_Propionibacteriaceae:g__                 |
| MID1 | denovo833 | 2  | k_Bacteria:p_Firmicutes:c_Clostridia:o_Clostridiales:f_Ruminococcaceae:g_Faecalibacterium                 |
| MID1 | denovo834 | 11 | k_Bacteria:p_Proteobacteria:c_Alphaproteobacteria:o_Sphingomonadales:f_Sphingomonadaceae:g_Sphingomonas   |
| MID1 | denovo836 | 16 | k_Bacteria:p_Cyanobacteria:c_Oscillatoriohyphyceae:o_Chroococcales:f_Xenococcaceae                        |
| MID1 | denovo837 | 1  | k_Bacteria:p_Firmicutes:c_Clostridia:o_Clostridiales:f_Clostridiaceae:g_Clostridium                       |
| MID1 | denovo838 | 1  | k_Bacteria:p_Actinobacteria:c_Acidimicrobia:o_Acidimicrobiales:f__g__                                     |
| MID1 | denovo841 | 7  | k_Bacteria:p_Proteobacteria:c_Alphaproteobacteria:o_Rhizobiales:f__g__                                    |
| MID1 | denovo844 | 4  | k_Bacteria:p_Proteobacteria:c_Betaproteobacteria:o_Burkholderiales:f_Comamonadaceae:g__                   |
| MID1 | denovo847 | 12 | k_Bacteria:p_Actinobacteria:c_Acidimicrobia:o_Acidimicrobiales:f_C111:g__                                 |
| MID1 | denovo849 | 1  | k_Bacteria:p_Proteobacteria:c_Alphaproteobacteria:o_Ellin329:f__g__                                       |
| MID1 | denovo85  | 1  | k_Bacteria:p_Proteobacteria:c_Deltaproteobacteria:o_Myxococcales:f_Nannocystaceae:g_Plesiocystis          |
| MID1 | denovo850 | 3  | k_Bacteria:p_Cyanobacteria:c_Oscillatoriohyphyceae:o_Oscillatoriales:f_Phormidiaceae:g_Phormidium         |
| MID1 | denovo851 | 8  | k_Bacteria:p_Proteobacteria:c_Alphaproteobacteria:o_Rhizobiales:f_Hyphomicrobiaceae:g_Devosia             |
| MID1 | denovo853 | 15 | k_Bacteria:p_Proteobacteria:c_Betaproteobacteria:o_Burkholderiales:f__g__                                 |
| MID1 | denovo855 | 1  | k_Bacteria:p_Proteobacteria:c_Alphaproteobacteria:o_Rhodobacterales:f_Rhodobacteraceae                    |
| MID1 | denovo858 | 44 | k_Bacteria:p_Actinobacteria:c_Actinobacteria:o_Actinomycetales:f_Nocardioideae:g_Propionimonas            |
| MID1 | denovo859 | 4  | k_Bacteria:p_Firmicutes:c_Clostridia:o_Clostridiales:f_Lachnospiraceae:g_Anaerostipes                     |
| MID1 | denovo86  | 3  | k_Bacteria:p_Proteobacteria:c_Alphaproteobacteria:o_Sphingomonadales:f_Erythrobacteraceae:g__             |
| MID1 | denovo860 | 1  | k_Bacteria:p_Firmicutes:c_Clostridia:o_Clostridiales:f__g__                                               |
| MID1 | denovo862 | 3  | k_Bacteria:p_FBP:c__o__f__g__                                                                             |
| MID1 | denovo863 | 1  | k_Bacteria:p_Actinobacteria:c_Actinobacteria:o_Actinomycetales:f_Intrasporangiaceae:g__                   |
| MID1 | denovo864 | 1  | k_Bacteria:p_Proteobacteria:c_Gammaproteobacteria:o_Legionellales:f__g__                                  |
| MID1 | denovo866 | 1  | k_Bacteria:p_Proteobacteria:c_Deltaproteobacteria:o_Spirobacillales:f__g__                                |
| MID1 | denovo868 | 1  | k_Bacteria:p_Firmicutes:c_Clostridia:o_Clostridiales:f_[Tissierellaceae]:g_Anaerococcus                   |
| MID1 | denovo87  | 1  | k_Bacteria:p_Proteobacteria:c_Alphaproteobacteria:o_Caulobacterales:f_Caulobacteraceae:g_Phenylobacterium |
| MID1 | denovo872 | 1  | k_Bacteria:p_Acidobacteria:c_iii1-8:o_32-20:f__g__                                                        |
| MID1 | denovo873 | 1  | k_Bacteria:p_Cyanobacteria:c_Synechococcophycideae:o_Pseudanabaenales:f_Pseudanabaenaceae:g__             |
| MID1 | denovo874 | 2  | k_Bacteria:p_Proteobacteria:c_Alphaproteobacteria:o_Rhodobacterales:f_Rhodobacteraceae:g_Amaricoccus      |
| MID1 | denovo876 | 1  | k_Bacteria:p_Actinobacteria:c_Actinobacteria:o_Actinomycetales:f_Mycobacteriaceae:g_Mycobacterium         |
| MID1 | denovo877 | 4  | k_Bacteria:p_Proteobacteria:c_Alphaproteobacteria:o_Rhodobacterales:f_Rhodobacteraceae:g__                |
| MID1 | denovo878 | 17 | k_Bacteria:p_Firmicutes:c_Bacilli:o_Lactobacillales:f_Streptococcaceae:g_Streptococcus                    |
| MID1 | denovo880 | 6  | k_Bacteria:p_Firmicutes:c_Clostridia:o_Clostridiales:f_Ruminococcaceae:g_Ruminococcus                     |
| MID1 | denovo882 | 4  | k_Bacteria:p_Cyanobacteria:c_Synechococcophycideae:o_Pseudanabaenales:f_Pseudanabaenaceae:g_Leptolyngbya  |
| MID1 | denovo885 | 14 | k_Bacteria:p_Firmicutes:c_Clostridia:o_Clostridiales:f_Ruminococcaceae:g__                                |
| MID1 | denovo887 | 3  | k_Bacteria:p_Proteobacteria:c_Alphaproteobacteria:o_Rhizobiales:f_Beljerinckiaceae:g__                    |
| MID1 | denovo897 | 4  | k_Bacteria:p_Actinobacteria:c_Actinobacteria:o_Actinomycetales:f_Corynebacteriaceae:g_Corynebacterium     |
| MID1 | denovo899 | 1  | k_Bacteria:p_Proteobacteria:c_Alphaproteobacteria:o_Rhizobiales:f_Hyphomicrobiaceae:g_Devosia             |
| MID1 | denovo901 | 2  | k_Bacteria:p_Bacteroidetes:c_Cytophagia:o_Cytophagales:f_Cytophagaceae:g_Spirosoma                        |
| MID1 | denovo902 | 20 | k_Bacteria:p_Cyanobacteria:c_Oscillatoriohyphyceae:o_Chroococcales:f_Xenococcaceae:g__                    |
| MID1 | denovo903 | 1  | k_Bacteria:p_Bacteroidetes:c_Bacteroidia:o_Bacteroidales:f_Prevotellaceae:g_Prevotella                    |
| MID1 | denovo905 | 1  | k_Bacteria:p_Acidobacteria:c_Acidobacteria-6:o_iii1-15:f_mb2424:g__                                       |
| MID1 | denovo906 | 1  | k_Bacteria:p_Proteobacteria:c_Betaproteobacteria:o_Burkholderiales:f_Oxalobacteraceae:g__                 |
| MID1 | denovo907 | 1  | k_Bacteria:p_Proteobacteria:c_Gammaproteobacteria:o_Xanthomonadales:f_Sinobacteraceae:g__                 |
| MID1 | denovo91  | 2  | k_Bacteria:p_Proteobacteria:c_Alphaproteobacteria:o_Caulobacterales:f_Caulobacteraceae:g_Brevundimonas    |
| MID1 | denovo910 | 1  | k_Bacteria:p_Proteobacteria:c_Alphaproteobacteria:o_Rhodobacterales:f_Rhodobacteraceae:g_Rubellimicrobium |
| MID1 | denovo911 | 2  | k_Bacteria:p_Acidobacteria:c_[Chloracidobacteria]:o_RB41:f_Ellin6075:g__                                  |
| MID1 | denovo912 | 2  | k_Bacteria:p_Proteobacteria:c_Alphaproteobacteria:o_Rhodobacterales:f_Rhodobacteraceae:g_Anaerospira      |
| MID1 | denovo913 | 1  | k_Bacteria:p_Acidobacteria:c_Solibacteres:o_Solibacterales:f__g__                                         |
| MID1 | denovo915 | 3  | k_Bacteria:p_Actinobacteria:c_Acidimicrobia:o_Acidimicrobiales:f__g__                                     |

|      |            |    |                                                                                                           |
|------|------------|----|-----------------------------------------------------------------------------------------------------------|
| MID1 | denovo916  | 1  | k_Bacteria:p_Firmicutes:c_Clostridia:o_Clostridiales:f_Ruminococcaceae:g__                                |
| MID1 | denovo917  | 1  | k_Bacteria:p__Proteobacteria:c_Alphaproteobacteria:o_Rhodobacterales:f_Rhodobacteraceae                   |
| MID1 | denovo918  | 5  | k_Bacteria:p_Actinobacteria:c_Actinobacteria:o_Actinomycetales:f_Microbacteriaceae:g_Rathayibacter        |
| MID1 | denovo920  | 2  | k_Bacteria:p__Proteobacteria:c_Gammaproteobacteria:o_Xanthomonadales:f_Xanthomonadaceae:g__               |
| MID1 | denovo922  | 1  | k_Bacteria:p__Proteobacteria:c_Alphaproteobacteria:o_Rhizobiales:f_Bradyrhizobiaceae                      |
| MID1 | denovo928  | 8  | k_Bacteria:p__Proteobacteria:c_Alphaproteobacteria:o_Rhodospirillales:f_Acetobacteraceae:g__              |
| MID1 | denovo929  | 1  | k_Bacteria:p_Actinobacteria:c_Actinobacteria:o_Actinomycetales:f_Corynebacteriaceae:g_Corynebacterium     |
| MID1 | denovo930  | 1  | k_Bacteria:p__Proteobacteria:c_Alphaproteobacteria:o_Rhodospirillales:f_Acetobacteraceae:g__              |
| MID1 | denovo931  | 1  | k_Bacteria:p_Cyanobacteria:c_o__f:g__                                                                     |
| MID1 | denovo934  | 1  | k_Bacteria:p__Proteobacteria:c_Alphaproteobacteria:o_Rhodobacterales:f_Rhodobacteraceae:g_Rhodobacter     |
| MID1 | denovo935  | 18 | k_Bacteria:p__Proteobacteria:c_Gammaproteobacteria:o_Xanthomonadales:f_Xanthomonadaceae:g_Thermomonas     |
| MID1 | denovo936  | 4  | k_Bacteria:p_Cyanobacteria:c_Oscillatoriohyphiceae:o_Oscillatoriales:f_Phormidiaceae:g_Phormidium         |
| MID1 | denovo939  | 58 | k_Bacteria:p_Firmicutes:c_Clostridia:o_Clostridiales:f_Clostridiaceae:g__                                 |
| MID1 | denovo940  | 2  | k_Bacteria:p__Proteobacteria:c_Alphaproteobacteria:o_Rhodobacterales:f_Rhodobacteraceae:g_Paracoccus      |
| MID1 | denovo941  | 1  | k_Bacteria:p__Bacteroidetes:c_Flavobacteriia:o_Flavobacteriales:f_Flavobacteriaceae:g_Aequorivita         |
| MID1 | denovo944  | 48 | k_Bacteria:p_Actinobacteria:c_Actinobacteria:o_Actinomycetales:f_Propionibacteriaceae:g__                 |
| MID1 | denovo945  | 2  | k_Bacteria:p_Cyanobacteria:c_Synechococcophycideae:o_Pseudanabaenales:f_Pseudanabaenaceae:g_Leptolyngbya  |
| MID1 | denovo946  | 3  | k_Bacteria:p__Proteobacteria:c_Gammaproteobacteria:o_Xanthomonadales:f_Xanthomonadaceae:g_Lysobacter      |
| MID1 | denovo947  | 7  | k_Bacteria:p_Firmicutes:c_Clostridia:o_Clostridiales:f_Ruminococcaceae:g__                                |
| MID1 | denovo948  | 3  | k_Bacteria:p_Cyanobacteria:c_Oscillatoriohyphiceae:o_Oscillatoriales:f_Phormidiaceae:g_Phormidium         |
| MID1 | denovo949  | 1  | k_Bacteria:p__Proteobacteria:c_Alphaproteobacteria:o_Caulobacterales:f_Caulobacteraceae:g__               |
| MID1 | denovo95   | 2  | k_Bacteria:p__Bacteroidetes:c_Flavobacteriia:o_Flavobacteriales:f[Weeksellaceae]:g_Chryseobacterium       |
| MID1 | denovo951  | 1  | k_Bacteria:p_Acidobacteria:c_[Chloracidobacteria]:o_RB41:f_Ellin6075:g__                                  |
| MID1 | denovo953  | 9  | k_Bacteria:p_Actinobacteria:c_Actinobacteria:o_Actinomycetales:f_Microbacteriaceae:g_Curtobacterium       |
| MID1 | denovo954  | 1  | k_Bacteria:p__Proteobacteria:c_Betaproteobacteria:o_SC-I-84:f:g__                                         |
| MID1 | denovo955  | 1  | k_Bacteria:p__Proteobacteria:c_Alphaproteobacteria:o_Rhizobiales:f_Methylobacteriaceae:g_Methylobacterium |
| MID1 | denovo958  | 1  | k_Bacteria:p__Proteobacteria:c_Alphaproteobacteria:o_Rhizobiales:f_Phyllobacteriaceae:g__                 |
| MID1 | denovo96   | 5  | k_Bacteria:p_Firmicutes:c_Clostridia:o_Clostridiales:f_[Tissierellaceae]:g_Anaerococcus                   |
| MID1 | denovo960  | 1  | k_Bacteria:p__Proteobacteria:c_Alphaproteobacteria:o_Rhodospirillales:f_Rhodospirillaceae:g__             |
| MID1 | denovo961  | 1  | k_Bacteria:p__Proteobacteria:c_Deltaproteobacteria:o_GMD14H09:f:g__                                       |
| MID1 | denovo963  | 6  | k_Bacteria:p__Proteobacteria:c_Alphaproteobacteria:o_Sphingomonadales:f_Sphingomonadaceae:g__             |
| MID1 | denovo964  | 3  | k_Bacteria:p__Proteobacteria:c_Gammaproteobacteria:o_Pseudomonadales:f_Moraxellaceae:g_Acinetobacter      |
| MID1 | denovo966  | 1  | k_Bacteria:p_Actinobacteria:c_Actinobacteria:o_Actinomycetales:f_Intrasporangiaceae:g_Arsenicococcus      |
| MID1 | denovo967  | 2  | k_Bacteria:p_Gemmatimonadetes:c_Gemmatimonadetes:o_Gemmatimonadales:f:g__                                 |
| MID1 | denovo968  | 18 | k_Bacteria:p__Bacteroidetes:c_Flavobacteriia:o_Flavobacteriales:f_Flavobacteriaceae:g_Gelidibacter        |
| MID1 | denovo969  | 1  | k_Bacteria:p__Proteobacteria:c_Gammaproteobacteria:o_Xanthomonadales:f_Xanthomonadaceae:g_Lysobacter      |
| MID1 | denovo97   | 1  | k_Bacteria:p_Gemmatimonadetes:c_Gemm-3:o__f:g__                                                           |
| MID1 | denovo970  | 1  | k_Bacteria:p__Proteobacteria:c_Betaproteobacteria:o_Burkholderiales:f_Comamonadaceae:g_Hylemonella        |
| MID1 | denovo972  | 1  | k_Bacteria:p_Firmicutes:c_Bacilli:o_Lactobacillales:f_Aerococcaceae:g__                                   |
| MID1 | denovo973  | 10 | k_Bacteria:p_Firmicutes:c_Bacilli:o_Bacillales:f_Staphylococcaceae:g_Leotgaliococcus                      |
| MID1 | denovo975  | 1  | k_Bacteria:p__Proteobacteria:c_Alphaproteobacteria:o_Sphingomonadales:f_Sphingomonadaceae:g_Sphingomonas  |
| MID1 | denovo977  | 6  | k_Bacteria:p_Cyanobacteria:c_Nostocophycideae:o_Stigonematales:f_Rivulariaceae:g_Calothrix                |
| MID1 | denovo979  | 3  | k_Bacteria:p__Proteobacteria:c_Alphaproteobacteria:o_Sphingomonadales:f_Sphingomonadaceae:g_Sphingomonas  |
| MID1 | denovo980  | 3  | k_Bacteria:p_Actinobacteria:c_Thermoleophilia:o_Solirubrobacterales:f_Solirubrobacteraceae:g__            |
| MID1 | denovo981  | 10 | k_Bacteria:p_Firmicutes:c_Bacilli:o_Lactobacillales:f_Leuconostocaceae:g__                                |
| MID1 | denovo982  | 2  | k_Bacteria:p__Proteobacteria:c_Alphaproteobacteria:o_Rhizobiales:f_Phyllobacteriaceae:g__                 |
| MID1 | denovo984  | 10 | k_Bacteria:p_Firmicutes:c_Clostridia:o_Clostridiales:f_[Tissierellaceae]:g_Tissierella_Soehngenia         |
| MID1 | denovo985  | 1  | k_Bacteria:p__Proteobacteria:c_Gammaproteobacteria:o_Pseudomonadales:f_Pseudomonadaceae:g__               |
| MID1 | denovo987  | 1  | k_Bacteria:p__Proteobacteria:c_Betaproteobacteria:o_Burkholderiales:f_Burkholderiaceae:g_Burkholderia     |
| MID1 | denovo988  | 6  | k_Bacteria:p_Firmicutes:c_Bacilli:o_Lactobacillales:f_Enterococcaceae:g_Enterococcus                      |
| MID1 | denovo989  | 1  | k_Bacteria:p_Actinobacteria:c_Acidimicrobia:o_Acidimicrobiales:f_EB1017:g__                               |
| MID1 | denovo99   | 1  | k_Bacteria:p_WPS-2:c_o__f:g__                                                                             |
| MID1 | denovo990  | 1  | k_Bacteria:p_Actinobacteria:c_Actinobacteria:o_Actinomycetales:f_Microbacteriaceae:g_Yonghaparkia         |
| MID1 | denovo993  | 1  | k_Bacteria:p_Gemmatimonadetes:c_Gemmatimonadetes:o_Gemmatimonadales:f:g__                                 |
| MID1 | denovo994  | 1  | k_Bacteria:p__Proteobacteria:c_Alphaproteobacteria:o_Rhodobacterales:f_Rhodobacteraceae                   |
| MID1 | denovo995  | 2  | k_Bacteria:p_Cyanobacteria:c_Oscillatoriohyphiceae:o_Oscillatoriales:f_Phormidiaceae:g_Phormidium         |
| MID1 | denovo996  | 7  | k_Bacteria:p_Actinobacteria:c_Actinobacteria:o_Actinomycetales:f_Intrasporangiaceae:g__                   |
| MID1 | denovo997  | 4  | k_Bacteria:p__Proteobacteria:c_Alphaproteobacteria:o_Sphingomonadales:f_Erythrobacteraceae:g__            |
| MID1 | denovo998  | 1  | k_Bacteria:p_Actinobacteria:c_Actinobacteria:o_Actinomycetales:f_Nocardioidaceae:g__                      |
| MID2 | denovo1014 | 2  | k_Bacteria:p__Proteobacteria:c_Alphaproteobacteria:o_Rhizobiales:f_Bradyrhizobiaceae:g_Balneimonas        |
| MID2 | denovo1015 | 1  | k_Bacteria:p_Firmicutes:c_Clostridia:o_Clostridiales:f_[Tissierellaceae]:g_1-68                           |
| MID2 | denovo1025 | 10 | k_Bacteria:p_Cyanobacteria:c_Nostocophycideae:o_Nostocales:f_Scytonemataceae:g__                          |
| MID2 | denovo1036 | 1  | k_Bacteria:p_Firmicutes:c_Bacilli:o_Bacillales:f_Bacillaceae                                              |
| MID2 | denovo1037 | 3  | k_Bacteria:p_Actinobacteria:c_Actinobacteria:o_Actinomycetales:f_Corynebacteriaceae:g_Corynebacterium     |
| MID2 | denovo1038 | 1  | k_Bacteria:p__Proteobacteria:c_Betaproteobacteria:o_Burkholderiales                                       |
| MID2 | denovo1041 | 1  | k_Bacteria:p_Nitrospirae:c_Nitrospira:o_Nitrospirales:f_Nitrospiraceae:g__                                |
| MID2 | denovo1043 | 11 | k_Bacteria:p_Firmicutes:c_Bacilli:o_Bacillales:f_Planococcaceae                                           |

|      |            |    |                                                                                                            |
|------|------------|----|------------------------------------------------------------------------------------------------------------|
| MID2 | denovo1044 | 1  | k_Bacteria:p_Firmicutes:c_Clostridia:o_Clostridiales:f_Lachnospiraceae:g_Coproccoccus                      |
| MID2 | denovo1045 | 1  | k_Bacteria:p_Actinobacteria:c_Actinobacteria:o_Actinomycetales:f_Micrococcaceae:g_Kocuria                  |
| MID2 | denovo1059 | 3  | k_Bacteria:p_Actinobacteria:c_Actinobacteria:o_Actinomycetales:f_Microbacteriaceae:g_Microbacterium        |
| MID2 | denovo1062 | 1  | k_Bacteria:p_Proteobacteria:c_Gammaproteobacteria:o_Legionellales:f_Coxiellaceae:g_                        |
| MID2 | denovo1084 | 1  | k_Bacteria:p_Proteobacteria:c_Alphaproteobacteria:o_Caulobacterales:f_Caulobacteraceae:g_                  |
| MID2 | denovo1086 | 2  | k_Bacteria:p_Actinobacteria:c_Actinobacteria:o_Actinomycetales:f_Nocardiodiaceae:g_                        |
| MID2 | denovo1093 | 1  | k_Bacteria:p_Firmicutes:c_Bacilli:o_Lactobacillales:f_Lactobacillaceae:g_Lactobacillus                     |
| MID2 | denovo1094 | 2  | k_Bacteria:p_Firmicutes:c_Bacilli:o_Lactobacillales:f_Aerococcaceae:g_Facklamia                            |
| MID2 | denovo1097 | 2  | k_Bacteria:p_Proteobacteria:c_Gammaproteobacteria:o_Xanthomonadales:f_Xanthomonadaceae:g_                  |
| MID2 | denovo110  | 1  | k_Bacteria:p_Proteobacteria:c_Betaproteobacteria:o_Procabbacteriales:f_Procabbacteriaceae:g_               |
| MID2 | denovo1100 | 2  | k_Bacteria:p_Firmicutes:c_Clostridia:o_Clostridiales:f_Lachnospiraceae:g_                                  |
| MID2 | denovo1121 | 1  | k_Bacteria:p_Bacteroidetes:c_Flavobacteriia:o_Flavobacteriales:f_[Weeksellaceae]:g_Chryseobacterium        |
| MID2 | denovo1122 | 66 | k_Bacteria:p_Proteobacteria:c_Gammaproteobacteria:o_Legionellales:f_Coxiellaceae:g_Rickettsiella           |
| MID2 | denovo113  | 1  | k_Bacteria:p_Proteobacteria:c_Alphaproteobacteria:o_Rhizobiales:f_Rhizobiaceae:g_                          |
| MID2 | denovo1132 | 1  | k_Bacteria:p_Firmicutes:c_Bacilli:o_Lactobacillales:f_Enterococcaceae:g_Vagococcus                         |
| MID2 | denovo1142 | 2  | k_Bacteria:p_Acidobacteria:c_[Chloracidobacteria]:o_RB41:f_Ellin6075:g_                                    |
| MID2 | denovo1151 | 2  | k_Bacteria:p_Firmicutes:c_Bacilli:o_Bacillales:f_Planococcaceae:g_Solibacillus                             |
| MID2 | denovo1158 | 1  | k_Bacteria:p_Firmicutes:c_Clostridia:o_Clostridiales:f_Lachnospiraceae:g_Epulisplacium                     |
| MID2 | denovo1161 | 3  | k_Bacteria:p_Firmicutes:c_Bacilli:o_Bacillales:f_Staphylococcaceae:g_Salinicoccus                          |
| MID2 | denovo1165 | 2  | k_Bacteria:p_Firmicutes:c_Clostridia:o_Clostridiales:f_[Tissierellaceae]:g_Anaerococcus                    |
| MID2 | denovo117  | 1  | k_Bacteria:p_Proteobacteria:c_Alphaproteobacteria:o_Rhodobacteriales:f_Rhodobacteraceae:g_Amaricoccus      |
| MID2 | denovo1173 | 1  | k_Bacteria:p_Proteobacteria:c_Alphaproteobacteria:o_Rhodobacteriales:f_Rhodobacteraceae:g_Paracoccus       |
| MID2 | denovo1184 | 1  | k_Bacteria:p_Proteobacteria:c_Alphaproteobacteria:o_Rhizobiales:f_Phyllobacteriaceae:g_                    |
| MID2 | denovo1190 | 1  | k_Bacteria:p_Actinobacteria:c_Actinobacteria:o_Actinomycetales:f_Micrococcaceae:g_Kocuria                  |
| MID2 | denovo1193 | 1  | k_Bacteria:p_Proteobacteria:c_Alphaproteobacteria:o_Rhodobacteriales:f_Rhodobacteraceae:g_Rubellimicrobium |
| MID2 | denovo1202 | 2  | k_Bacteria:p_Proteobacteria:c_Alphaproteobacteria:o_Rhizobiales:f_Methylobacteriaceae:g_Methylobacterium   |
| MID2 | denovo1203 | 1  | k_Bacteria:p_Proteobacteria:c_Alphaproteobacteria:o_Rhizobiales:f_Methylobacteriaceae:g_Methylobacterium   |
| MID2 | denovo1205 | 1  | k_Bacteria:p_Actinobacteria:c_Acidimicrobia:o_Acidimicrobiales:f_:g_                                       |
| MID2 | denovo1212 | 1  | k_Bacteria:p_Proteobacteria:c_Alphaproteobacteria:o_Rhodobacteriales:f_Rhodobacteraceae:g_Rhodobacter      |
| MID2 | denovo1215 | 1  | k_Bacteria:p_Proteobacteria:c_Deltaproteobacteria:o_Myxococcales:f_:g_                                     |
| MID2 | denovo1218 | 2  | k_Bacteria:p_Proteobacteria:c_Alphaproteobacteria:o_Sphingomonadales:f_Sphingomonadaceae:g_Sphingobium     |
| MID2 | denovo1220 | 1  | k_Bacteria:p_Bacteroidetes:c_[Saprosirae]:o_[Saprosirales]:f_Saprosiraceae:g_                              |
| MID2 | denovo1228 | 3  | k_Bacteria:p_Firmicutes:c_Bacilli:o_Lactobacillales:f_Lactobacillaceae:g_Lactobacillus                     |
| MID2 | denovo1230 | 3  | k_Bacteria:p_Proteobacteria:c_Betaproteobacteria:o_Burkholderiales:f_Comamonadaceae:g_Comamonas            |
| MID2 | denovo1234 | 2  | k_Bacteria:p_Actinobacteria:c_Thermoleophila:o_Solirubrobacteriales:f_:g_                                  |
| MID2 | denovo1241 | 2  | k_Bacteria:p_Actinobacteria:c_Thermoleophila:o_Solirubrobacteriales:f_Patulibacteraceae:g_                 |
| MID2 | denovo1248 | 1  | k_Bacteria:p_Proteobacteria:c_Alphaproteobacteria:o_Rhodospirillales:f_Rhodospirillaceae:g_                |
| MID2 | denovo1250 | 3  | k_Bacteria:p_Proteobacteria:c_Alphaproteobacteria:o_Sphingomonadales:f_Sphingomonadaceae:g_Kaistobacter    |
| MID2 | denovo1253 | 12 | k_Bacteria:p_Proteobacteria:c_Alphaproteobacteria:o_Rhizobiales:f_Rhizobiaceae:g_Agrobacterium             |
| MID2 | denovo1254 | 2  | k_Bacteria:p_Proteobacteria:c_Alphaproteobacteria:o_Caulobacterales:f_Caulobacteraceae:g_Mycoplasma        |
| MID2 | denovo1257 | 3  | k_Bacteria:p_Proteobacteria:c_Alphaproteobacteria:o_Sphingomonadales:f_Sphingomonadaceae                   |
| MID2 | denovo1272 | 1  | k_Bacteria:p_Proteobacteria:c_Alphaproteobacteria:o_Caulobacterales:f_Caulobacteraceae:g_                  |
| MID2 | denovo1284 | 2  | k_Bacteria:p_Proteobacteria:c_Alphaproteobacteria:o_Sphingomonadales:f_Sphingomonadaceae:g_Kaistobacter    |
| MID2 | denovo1290 | 2  | k_Bacteria:p_Actinobacteria:c_Actinobacteria:o_Actinomycetales:f_Dermabacteraceae:g_Brachybacterium        |
| MID2 | denovo1298 | 1  | k_Bacteria:p_Proteobacteria:c_Alphaproteobacteria:o_Caulobacterales:f_Caulobacteraceae:g_Brevundimonas     |
| MID2 | denovo1300 | 3  | k_Bacteria:p_Actinobacteria:c_Actinobacteria:o_Actinomycetales:f_Nocardiodiaceae:g_Friedmanniella          |
| MID2 | denovo1301 | 2  | k_Bacteria:p_Actinobacteria:c_Coriobacteriia:o_Coriobacteriales:f_Coriobacteriaceae:g_Collinsella          |
| MID2 | denovo1302 | 2  | k_Bacteria:p_Spirochaetes:c_Spirochaetes:o_Spirochaetales:f_Spirochaetaceae:g_Treponema                    |
| MID2 | denovo1308 | 3  | k_Bacteria:p_Firmicutes:c_Bacilli:o_Lactobacillales:f_Streptococcaceae:g_Streptococcus                     |
| MID2 | denovo1311 | 5  | k_Bacteria:p_Firmicutes:c_Clostridia:o_Clostridiales:f_Clostridiaceae:g_                                   |
| MID2 | denovo1334 | 23 | k_Bacteria:p_Firmicutes:c_Bacilli:o_Lactobacillales:f_Streptococcaceae:g_Streptococcus                     |
| MID2 | denovo134  | 6  | k_Bacteria:p_Firmicutes:c_Bacilli:o_Lactobacillales:f_:g_                                                  |
| MID2 | denovo1341 | 2  | k_Bacteria:p_Firmicutes:c_Clostridia:o_Clostridiales:f_[Tissierellaceae]:g_Anaerococcus                    |
| MID2 | denovo1346 | 2  | k_Bacteria:p_Firmicutes:c_Bacilli:o_Lactobacillales:f_Streptococcaceae:g_Lactococcus                       |
| MID2 | denovo1347 | 2  | k_Bacteria:p_Proteobacteria:c_Gammaproteobacteria:o_Xanthomonadales:f_Xanthomonadaceae:g_Luteibacter       |
| MID2 | denovo1350 | 3  | k_Bacteria:p_Firmicutes:c_Clostridia:o_Clostridiales:f_[Tissierellaceae]:g_Anaerococcus                    |
| MID2 | denovo1357 | 1  | k_Bacteria:p_Proteobacteria:c_Alphaproteobacteria:o_Rhodospirillales:f_Rhodospirillaceae:g_                |
| MID2 | denovo138  | 2  | k_Bacteria:p_Proteobacteria:c_Alphaproteobacteria:o_Rhodospirillales:f_Rhodospirillaceae:g_Skermanella     |
| MID2 | denovo149  | 1  | k_Bacteria:p_Actinobacteria:c_Actinobacteria:o_Actinomycetales:f_Cellulomonadaceae:g_Cellulomonas          |
| MID2 | denovo159  | 1  | k_Bacteria:p_Actinobacteria:c_Actinobacteria:o_Actinomycetales:f_Propionibacteriaceae:g_Microlunatus       |
| MID2 | denovo166  | 2  | k_Bacteria:p_Proteobacteria:c_Gammaproteobacteria:o_Enterobacteriales:f_Enterobacteriaceae:g_              |
| MID2 | denovo174  | 1  | k_Bacteria:p_Proteobacteria:c_Alphaproteobacteria:o_Sphingomonadales:f_Sphingomonadaceae:g_                |
| MID2 | denovo178  | 2  | k_Bacteria:p_Bacteroidetes:c_[Rhodothermi]:o_[Rhodothermales]:f_Rhodothermaceae:g_Rubricoccus              |
| MID2 | denovo18   | 6  | k_Bacteria:p_Proteobacteria:c_Gammaproteobacteria:o_Pseudomonadales:f_Pseudomonadaceae:g_Pseudomonas       |
| MID2 | denovo183  | 11 | k_Bacteria:p_Cyanobacteria:c_Oscillatoriohyphaceae:o_Chroococcales:f_Xenococcaceae                         |
| MID2 | denovo184  | 6  | k_Bacteria:p_Firmicutes:c_Clostridia:o_Clostridiales:f_[Tissierellaceae]:g_Peptoniphilus                   |
| MID2 | denovo185  | 63 | k_Bacteria:p_Proteobacteria:c_Gammaproteobacteria:o_Xanthomonadales:f_Xanthomonadaceae:g_                  |

|      |           |    |                                                                                                                 |
|------|-----------|----|-----------------------------------------------------------------------------------------------------------------|
| MID2 | denovo187 | 3  | k__Bacteria:p__Firmicutes:c__Clostridia:o__Clostridiales:f__Clostridiaceae:g__                                  |
| MID2 | denovo193 | 1  | k__Bacteria:p__Proteobacteria:c__Alphaproteobacteria:o__Caulobacterales:f__Caulobacteraceae:g__Phenylobacterium |
| MID2 | denovo199 | 1  | k__Bacteria:p__Proteobacteria:c__Betaproteobacteria:o__Rhodocyclales:f__Rhodocyclaceae                          |
| MID2 | denovo201 | 1  | k__Bacteria:p__Firmicutes:c__Clostridia:o__Clostridiales:f__Peptostreptococcaceae:g__Peptostreptococcus         |
| MID2 | denovo207 | 3  | k__Bacteria:p__Actinobacteria:c__Acidimicrobia:o__Acidimicrobiales:f__C111:g__                                  |
| MID2 | denovo210 | 1  | k__Bacteria:p__Proteobacteria:c__Gammaproteobacteria:o__Xanthomonadales:f__Xanthomonadaceae:g__                 |
| MID2 | denovo213 | 2  | k__Bacteria:p__Proteobacteria:c__Gammaproteobacteria:o__Xanthomonadales:f__Xanthomonadaceae:g__Luteimonas       |
| MID2 | denovo219 | 1  | k__Bacteria:p__Proteobacteria:c__Alphaproteobacteria:o__Rhodobacterales:f__Rhodobacteraceae:g__Rubellimicrobium |
| MID2 | denovo224 | 1  | k__Bacteria:p__Actinobacteria:c__Actinobacteria:o__Actinomycetales:f__Microbacteriaceae:g__Agromyces            |
| MID2 | denovo228 | 1  | k__Bacteria:p__Proteobacteria:c__Alphaproteobacteria:o__Sphingomonadales:f__Sphingomonadaceae:g__Sphingomonas   |
| MID2 | denovo232 | 3  | k__Bacteria:p__Firmicutes:c__Clostridia:o__Clostridiales:f__[Tissierellaceae]:g__Anaerococcus                   |
| MID2 | denovo244 | 1  | k__Bacteria:p__Proteobacteria:c__Alphaproteobacteria:o__Caulobacterales:f__Caulobacteraceae                     |
| MID2 | denovo245 | 1  | k__Bacteria:p__Proteobacteria:c__Alphaproteobacteria:o__Rhizobiales:f__Methylobacteriaceae:g__Methylobacterium  |
| MID2 | denovo252 | 3  | k__Bacteria:p__Actinobacteria:c__Actinobacteria:o__Actinomycetales:f__Intrasporangiaceae:g__Kytococcus          |
| MID2 | denovo253 | 2  | k__Bacteria:p__Gemmatimonadetes:c__Gemmatimonadetes:o__N1423WL:f__g__                                           |
| MID2 | denovo266 | 4  | k__Bacteria:p__Proteobacteria:c__Alphaproteobacteria:o__Sphingomonadales:f__Erythrobacteraceae                  |
| MID2 | denovo267 | 1  | k__Bacteria:p__Proteobacteria:c__Alphaproteobacteria:o__Sphingomonadales:f__Sphingomonadaceae:g__Sphingomonas   |
| MID2 | denovo271 | 1  | k__Bacteria:p__Actinobacteria:c__Thermoleophila:o__Solirubrobacterales:f__g__                                   |
| MID2 | denovo282 | 1  | k__Bacteria:p__Proteobacteria:c__Gammaproteobacteria:o__Xanthomonadales:f__Xanthomonadaceae:g__Stenotrophomonas |
| MID2 | denovo288 | 5  | k__Bacteria:p__Proteobacteria:c__Alphaproteobacteria:o__Caulobacterales:f__Caulobacteraceae:g__                 |
| MID2 | denovo289 | 3  | k__Bacteria:p__Cyanobacteria:c__Synechococcophycideae:o__Pseudanabaenales:f__Pseudanabaenaceae:g__Leptolyngbya  |
| MID2 | denovo291 | 1  | k__Bacteria:p__Proteobacteria:c__Betaproteobacteria:o__Burkholderiales:f__Comamonadaceae:g__Delftia             |
| MID2 | denovo293 | 2  | k__Bacteria:p__Acidobacteria:c__Solibacteres:o__Solibacterales:f__g__                                           |
| MID2 | denovo294 | 1  | k__Bacteria:p__Firmicutes:c__Clostridia:o__Clostridiales:f__[Tissierellaceae]:g__Peptoniphilus                  |
| MID2 | denovo30  | 1  | k__Bacteria:p__Actinobacteria:c__Actinobacteria:o__Actinomycetales:f__Bogoriellaceae:g__Georgenia               |
| MID2 | denovo306 | 3  | k__Bacteria:p__Bacteroidetes:c__Flavobacteriia:o__Flavobacteriales:f__Flavobacteriaceae:g__Aequorivita          |
| MID2 | denovo318 | 1  | k__Bacteria:p__Cyanobacteria:c__Oscillatoriophyceidae:o__Chroococcales:f__Xenococcaceae:g__                     |
| MID2 | denovo322 | 1  | k__Bacteria:p__Proteobacteria:c__Alphaproteobacteria:o__Rhodobacterales:f__Rhodobacteraceae:g__                 |
| MID2 | denovo323 | 1  | k__Bacteria:p__Proteobacteria:c__Gammaproteobacteria:o__Pseudomonadales:f__Pseudomonadaceae:g__Pseudomonas      |
| MID2 | denovo353 | 8  | k__Bacteria:p__Proteobacteria:c__Alphaproteobacteria:o__Rhodobacterales:f__Rhodobacteraceae:g__Rubellimicrobium |
| MID2 | denovo361 | 20 | k__Bacteria:p__Firmicutes:c__Bacilli:o__Lactobacillales:f__Lactobacillaceae:g__Lactobacillus                    |
| MID2 | denovo374 | 1  | k__Bacteria:p__Actinobacteria:c__Actinobacteria:o__Actinomycetales:f__Microbacteriaceae:g__Cryocola             |
| MID2 | denovo388 | 3  | k__Bacteria:p__Proteobacteria:c__Gammaproteobacteria:o__Pseudomonadales:f__Pseudomonadaceae:g__Pseudomonas      |
| MID2 | denovo391 | 1  | k__Bacteria:p__Bacteroidetes:c__Cytophagia:o__Cytophagales:f__Cytophagaceae:g__Rudanella                        |
| MID2 | denovo393 | 5  | k__Bacteria:p__Proteobacteria:c__Gammaproteobacteria:o__Xanthomonadales:f__Xanthomonadaceae:g__Lysobacter       |
| MID2 | denovo40  | 1  | k__Bacteria:p__Proteobacteria:c__Alphaproteobacteria:o__Sphingomonadales:f__Erythrobacteraceae:g__              |
| MID2 | denovo404 | 4  | k__Bacteria:p__Firmicutes:c__Bacilli:o__Lactobacillales:f__Enterococcaceae:g__Enterococcus                      |
| MID2 | denovo429 | 1  | k__Bacteria:p__Firmicutes:c__Clostridia:o__Clostridiales:f__Clostridiaceae:g__Clostridium                       |
| MID2 | denovo43  | 1  | k__Bacteria:p__Actinobacteria:c__Actinobacteria:o__Actinomycetales:f__g__                                       |
| MID2 | denovo439 | 2  | k__Bacteria:p__Firmicutes:c__Bacilli:o__Turicibacterales:f__Turicibacteraceae:g__Turicibacter                   |
| MID2 | denovo443 | 1  | k__Bacteria:p__Proteobacteria:c__Alphaproteobacteria:o__Rhizobiales:f__Bradyrhizobiaceae:g__                    |
| MID2 | denovo454 | 1  | k__Bacteria:p__Proteobacteria:c__Alphaproteobacteria:o__Sphingomonadales:f__Sphingomonadaceae:g__Kaistobacter   |
| MID2 | denovo464 | 3  | k__Bacteria:p__Proteobacteria:c__Alphaproteobacteria:o__Rhodospirillales:f__g__                                 |
| MID2 | denovo468 | 2  | k__Bacteria:p__Firmicutes:c__Clostridia:o__Clostridiales:f__Ruminococcaceae:g__                                 |
| MID2 | denovo470 | 1  | k__Bacteria:p__Actinobacteria:c__Actinobacteria:o__Actinomycetales:f__g__                                       |
| MID2 | denovo482 | 1  | k__Bacteria:p__Actinobacteria:c__Thermoleophila:o__Solirubrobacterales:f__g__                                   |
| MID2 | denovo485 | 1  | k__Bacteria:p__Firmicutes:c__Clostridia:o__Clostridiales:f__Lachnospiraceae:g__Blautia                          |
| MID2 | denovo489 | 1  | k__Bacteria:p__Proteobacteria:c__Gammaproteobacteria:o__Pseudomonadales:f__Pseudomonadaceae:g__                 |
| MID2 | denovo492 | 2  | k__Bacteria:p__Cyanobacteria:c__Oscillatoriophyceidae:o__Chroococcales:f__Xenococcaceae:g__Chroococcidiopsis    |
| MID2 | denovo499 | 1  | k__Bacteria:p__Firmicutes:c__Clostridia:o__Clostridiales:f__Lachnospiraceae:g__Roseburia                        |
| MID2 | denovo502 | 1  | k__Bacteria:p__Firmicutes:c__Bacilli:o__Lactobacillales:f__Leuconostocaceae:g__Leuconostoc                      |
| MID2 | denovo505 | 1  | k__Bacteria:p__Acidobacteria:c__Sva0725:o__Sva0725:f__g__                                                       |
| MID2 | denovo506 | 1  | k__Bacteria:p__Proteobacteria:c__Gammaproteobacteria:o__Enterobacteriales:f__Enterobacteriaceae                 |
| MID2 | denovo510 | 1  | k__Bacteria:p__Firmicutes:c__Clostridia:o__Clostridiales:f__[Mogibacteriaceae]:g__                              |
| MID2 | denovo514 | 2  | k__Bacteria:p__Cyanobacteria:c__Chloroplast:o__Stramenopiles:f__g__                                             |
| MID2 | denovo520 | 1  | k__Bacteria:p__Acidobacteria:c__[Chloracidobacteria]:o__RB41:f__Ellin6075:g__                                   |
| MID2 | denovo524 | 1  | k__Bacteria:p__Acidobacteria:c__[Chloracidobacteria]:o__RB41:f__Ellin6075:g__                                   |
| MID2 | denovo530 | 3  | k__Bacteria:p__Firmicutes:c__Bacilli:o__Lactobacillales:f__Lactobacillaceae:g__Lactobacillus                    |
| MID2 | denovo542 | 25 | k__Bacteria:p__Firmicutes:c__Clostridia:o__Clostridiales:f__[Tissierellaceae]:g__Finegoldia                     |
| MID2 | denovo548 | 1  | k__Bacteria:p__Firmicutes:c__Clostridia:o__Clostridiales:f__Lachnospiraceae:g__                                 |
| MID2 | denovo56  | 1  | k__Bacteria:p__Proteobacteria:c__Alphaproteobacteria:o__Rhodobacterales:f__Rhodobacteraceae:g__Rubellimicrobium |
| MID2 | denovo568 | 5  | k__Bacteria:p__Proteobacteria:c__Alphaproteobacteria:o__Sphingomonadales:f__Sphingomonadaceae:g__Sphingobium    |
| MID2 | denovo57  | 1  | k__Bacteria:p__Proteobacteria:c__Alphaproteobacteria:o__Sphingomonadales:f__Sphingomonadaceae                   |
| MID2 | denovo58  | 3  | k__Bacteria:p__Firmicutes:c__Bacilli:o__Lactobacillales:f__Lactobacillaceae:g__Lactobacillus                    |
| MID2 | denovo592 | 4  | k__Bacteria:p__Firmicutes:c__Clostridia:o__Clostridiales:f__Clostridiaceae:g__                                  |
| MID2 | denovo595 | 1  | k__Bacteria:p__Proteobacteria:c__Alphaproteobacteria:o__Rhodobacterales:f__Rhodobacteraceae:g__Amaricoccus      |
| MID2 | denovo596 | 1  | k__Bacteria:p__Firmicutes:c__Bacilli:o__Bacillales:f__Bacillaceae:g__Geobacillus                                |

|      |           |    |                                                                                                                  |
|------|-----------|----|------------------------------------------------------------------------------------------------------------------|
| MID2 | denovo600 | 3  | k__Bacteria:p__Cyanobacteria:c__Oscillatorioophycideae:o__Oscillatoriales:f__Phormidiaceae:g__Phormidium         |
| MID2 | denovo605 | 3  | k__Bacteria:p__Firmicutes:c__Bacilli:o__Gemellales:f__Gemellaceae:g__Gemella                                     |
| MID2 | denovo61  | 2  | k__Bacteria:p__Actinobacteria:c__Actinobacteria:o__Actinomycetales:f__Actinomycetaceae:g__Actinomyces            |
| MID2 | denovo624 | 1  | k__Bacteria:p__Proteobacteria:c__Gammaproteobacteria:o__Xanthomonadales:f__Xanthomonadaceae:g__                  |
| MID2 | denovo626 | 1  | k__Bacteria:p__Cyanobacteria:c__Oscillatorioophycideae:o__Chroococcales:f__g__                                   |
| MID2 | denovo628 | 1  | k__Bacteria:p__Proteobacteria:c__Gammaproteobacteria:o__Xanthomonadales:f__Xanthomonadaceae:g__Arenimonas        |
| MID2 | denovo63  | 53 | k__Bacteria:p__Firmicutes:c__Bacilli:o__Lactobacillales:f__Lactobacillaceae:g__Lactobacillus                     |
| MID2 | denovo630 | 1  | k__Bacteria:p__Bacteroidetes:c__Flavobacteriia:o__Flavobacteriales:f__[Weeksellaceae]:g__Chryseobacterium        |
| MID2 | denovo631 | 3  | k__Bacteria:p__Firmicutes:c__Clostridia:o__Clostridiales:f__g__                                                  |
| MID2 | denovo632 | 1  | k__Bacteria:p__FBP:c__o__f__g__                                                                                  |
| MID2 | denovo633 | 4  | k__Bacteria:p__Armatimonadetes:c__Armatimonadia:o__Armatimonadales:f__Armatimonadaceae:g__                       |
| MID2 | denovo635 | 1  | k__Bacteria:p__Proteobacteria:c__Betaproteobacteria:o__SC-I-84:f__g__                                            |
| MID2 | denovo639 | 3  | k__Bacteria:p__Actinobacteria:c__Actinobacteria:o__Actinomycetales:f__Geodermatophilaceae:g__Modestobacter       |
| MID2 | denovo64  | 1  | k__Bacteria:p__Proteobacteria:c__Betaproteobacteria:o__Burkholderiales:f__Comamonadaceae                         |
| MID2 | denovo640 | 1  | k__Bacteria:p__Firmicutes:c__Clostridia:o__Clostridiales:f__Ruminococcaceae:g__                                  |
| MID2 | denovo642 | 1  | k__Bacteria:p__Proteobacteria:c__Alphaproteobacteria:o__Sphingomonadales:f__Erythrobacteraceae:g__Lutibacterium  |
| MID2 | denovo65  | 3  | k__Bacteria:p__Firmicutes:c__Bacilli:o__Bacillales:f__[Exiguobacteraceae]:g__Exiguobacterium                     |
| MID2 | denovo655 | 2  | k__Bacteria:p__Firmicutes:c__Clostridia:o__Clostridiales:f__[Tissierellaceae]:g__Anaerococcus                    |
| MID2 | denovo661 | 1  | k__Bacteria:p__Actinobacteria:c__Actinobacteria:o__Actinomycetales:f__g__                                        |
| MID2 | denovo662 | 1  | k__Bacteria:p__Bacteroidetes:c__Bacteroidia:o__Bacteroidales:f__Prevotellaceae:g__Prevotella                     |
| MID2 | denovo665 | 5  | k__Bacteria:p__Firmicutes:c__Bacilli:o__Lactobacillales:f__Lactobacillaceae:g__Lactobacillus                     |
| MID2 | denovo666 | 1  | k__Bacteria:p__Firmicutes:c__Bacilli:o__Lactobacillales:f__Ferrococcaceae:g__Aerococcus                          |
| MID2 | denovo667 | 1  | k__Bacteria:p__Actinobacteria:c__Thermoleophila:o__Solirubrobacterales:f__g__                                    |
| MID2 | denovo668 | 1  | k__Bacteria:p__Proteobacteria:c__Betaproteobacteria:o__Neisseriales:f__Neisseriaceae:g__Neisseria                |
| MID2 | denovo672 | 1  | k__Bacteria:p__Firmicutes:c__Bacilli:o__Bacillales:f__g__                                                        |
| MID2 | denovo699 | 1  | k__Bacteria:p__Proteobacteria:c__Alphaproteobacteria:o__Rhodospirillales:f__Acetobacteraceae:g__                 |
| MID2 | denovo700 | 2  | k__Bacteria:p__Proteobacteria:c__Gammaproteobacteria:o__Xanthomonadales:f__Xanthomonadaceae:g__Pseudoxanthomonas |
| MID2 | denovo709 | 15 | k__Bacteria:p__Proteobacteria:c__Gammaproteobacteria:o__Pseudomonadales:f__Moraxellaceae:g__Enhydrobacter        |
| MID2 | denovo710 | 2  | k__Bacteria:p__Proteobacteria:c__Alphaproteobacteria:o__Sphingomonadales:f__g__                                  |
| MID2 | denovo713 | 2  | k__Bacteria:p__Bacteroidetes:c__Sphingobacteria:o__Sphingobacteriales:f__Sphingobacteriaceae:g__Sphingobacterium |
| MID2 | denovo729 | 3  | k__Bacteria:p__Proteobacteria:c__Alphaproteobacteria:o__Rhizobiales:f__Phyllobacteriaceae                        |
| MID2 | denovo733 | 1  | k__Bacteria:p__Proteobacteria:c__Gammaproteobacteria:o__Xanthomonadales:f__Xanthomonadaceae:g__                  |
| MID2 | denovo734 | 2  | k__Bacteria:p__Proteobacteria:c__Betaproteobacteria:o__Neisseriales:f__Neisseriaceae:g__Neisseria                |
| MID2 | denovo748 | 9  | k__Bacteria:p__Proteobacteria:c__Gammaproteobacteria:o__Xanthomonadales:f__Xanthomonadaceae:g__Lysobacter        |
| MID2 | denovo75  | 9  | k__Bacteria:p__Proteobacteria:c__Betaproteobacteria:o__Burkholderiales:f__Comamonadaceae:g__Comamonas            |
| MID2 | denovo760 | 1  | k__Bacteria:p__Firmicutes:c__Bacilli:o__Bacillales:f__Paenibacillaceae:g__Paenibacillus                          |
| MID2 | denovo763 | 6  | k__Bacteria:p__Actinobacteria:c__Thermoleophila:o__Gaiellales:f__Gaiellaceae:g__                                 |
| MID2 | denovo770 | 11 | k__Bacteria:p__Cyanobacteria:c__Oscillatorioophycideae:o__Chroococcales:f__Xenococcaceae:g__                     |
| MID2 | denovo777 | 2  | k__Bacteria:p__Firmicutes:c__Clostridia:o__Clostridiales:f__Ruminococcaceae:g__                                  |
| MID2 | denovo778 | 1  | k__Bacteria:p__Fusobacteria:c__Fusobacteriia:o__Fusobacteriales:f__Fusobacteriaceae:g__Fusobacterium             |
| MID2 | denovo79  | 4  | k__Bacteria:p__Firmicutes:c__Clostridia:o__Clostridiales:f__[Tissierellaceae]:g__Anaerococcus                    |
| MID2 | denovo798 | 1  | k__Bacteria:p__Proteobacteria:c__Deltaproteobacteria:o__Myxococcales:f__g__                                      |
| MID2 | denovo803 | 3  | k__Bacteria:p__Actinobacteria:c__Actinobacteria:o__Actinomycetales:f__Sporichthyaceae:g__                        |
| MID2 | denovo805 | 1  | k__Bacteria:p__Firmicutes:c__Clostridia:o__Clostridiales:f__[Mogibacteriaceae]:g__                               |
| MID2 | denovo807 | 3  | k__Bacteria:p__Firmicutes:c__Clostridia:o__Clostridiales:f__Lachnospiraceae:g__                                  |
| MID2 | denovo808 | 1  | k__Bacteria:p__Proteobacteria:c__Alphaproteobacteria:o__Sphingomonadales:f__Sphingomonadaceae:g__Sphingomonas    |
| MID2 | denovo812 | 65 | k__Bacteria:p__Bacteroidetes:c__Flavobacteriia:o__Flavobacteriales:f__[Weeksellaceae]:g__Wautersiella            |
| MID2 | denovo813 | 1  | k__Bacteria:p__Proteobacteria:c__Gammaproteobacteria:o__Xanthomonadales:f__Xanthomonadaceae:g__Stenotrophomonas  |
| MID2 | denovo828 | 2  | k__Bacteria:p__Firmicutes:c__Clostridia:o__Clostridiales:f__Clostridiaceae:g__Clostridium                        |
| MID2 | denovo829 | 6  | k__Bacteria:p__Firmicutes:c__Bacilli:o__Lactobacillales:f__Carnobacteriaceae:g__Carnobacterium                   |
| MID2 | denovo83  | 1  | k__Bacteria:p__Actinobacteria:c__Actinobacteria:o__Actinomycetales:f__Corynebacteriaceae:g__Corynebacterium      |
| MID2 | denovo831 | 1  | k__Bacteria:p__Actinobacteria:c__Actinobacteria:o__Actinomycetales:f__Propionibacteriaceae:g__                   |
| MID2 | denovo836 | 1  | k__Bacteria:p__Cyanobacteria:c__Oscillatorioophycideae:o__Chroococcales:f__Xenococcaceae                         |
| MID2 | denovo838 | 1  | k__Bacteria:p__Actinobacteria:c__Acidimicrobiia:o__Acidimicrobiales:f__g__                                       |
| MID2 | denovo840 | 1  | k__Bacteria:p__Gemmatimonadetes:c__Gemm-1:o__f__g__                                                              |
| MID2 | denovo841 | 4  | k__Bacteria:p__Proteobacteria:c__Alphaproteobacteria:o__Rhizobiales:f__g__                                       |
| MID2 | denovo842 | 1  | k__Bacteria:p__Firmicutes:c__Bacilli:o__Lactobacillales:f__Lactobacillaceae:g__Lactobacillus                     |
| MID2 | denovo844 | 1  | k__Bacteria:p__Proteobacteria:c__Betaproteobacteria:o__Burkholderiales:f__Comamonadaceae:g__                     |
| MID2 | denovo845 | 13 | k__Bacteria:p__Proteobacteria:c__Gammaproteobacteria:o__Xanthomonadales:f__Xanthomonadaceae:g__Stenotrophomonas  |
| MID2 | denovo858 | 1  | k__Bacteria:p__Actinobacteria:c__Actinobacteria:o__Actinomycetales:f__Nocardiodiaceae:g__Propionimonas           |
| MID2 | denovo868 | 1  | k__Bacteria:p__Firmicutes:c__Clostridia:o__Clostridiales:f__[Tissierellaceae]:g__Anaerococcus                    |
| MID2 | denovo87  | 2  | k__Bacteria:p__Proteobacteria:c__Alphaproteobacteria:o__Caulobacterales:f__Caulobacteraceae:g__Phenyllobacterium |
| MID2 | denovo874 | 2  | k__Bacteria:p__Proteobacteria:c__Alphaproteobacteria:o__Rhodobacterales:f__Rhodobacteraceae:g__Amaricoccus       |
| MID2 | denovo878 | 2  | k__Bacteria:p__Firmicutes:c__Bacilli:o__Lactobacillales:f__Streptococcaceae:g__Streptococcus                     |
| MID2 | denovo880 | 1  | k__Bacteria:p__Firmicutes:c__Clostridia:o__Clostridiales:f__Ruminococcaceae:g__Ruminococcus                      |
| MID2 | denovo881 | 1  | k__Bacteria:p__Firmicutes:c__Clostridia:o__Clostridiales:f__[Tissierellaceae]:g__1-68                            |
| MID2 | denovo882 | 1  | k__Bacteria:p__Cyanobacteria:c__Synechococcophycideae:o__Pseudanabaenales:f__Pseudanabaenaceae:g__Leptolyngbya   |

|      |            |    |                                                                                                           |
|------|------------|----|-----------------------------------------------------------------------------------------------------------|
| MID2 | denovo885  | 1  | k_Bacteria:p_Firmicutes:c_Clostridia:o_Clostridiales:f_Ruminococcaceae:g_                                 |
| MID2 | denovo886  | 2  | k_Bacteria:p_Firmicutes:c_Clostridia:o_Clostridiales:f_Tissierellaceae:g_Peptoniphilus                    |
| MID2 | denovo888  | 2  | k_Bacteria:p_Proteobacteria:c_Alphaproteobacteria:o_Rhodobacterales:f_Rhodobacteraceae:g_                 |
| MID2 | denovo893  | 5  | k_Bacteria:p_Firmicutes:c_Bacilli:o_Lactobacillales:f_Lactobacillaceae:g_Lactobacillus                    |
| MID2 | denovo894  | 1  | k_Bacteria:p_Firmicutes:c_Clostridia:o_MBA08:f_g_                                                         |
| MID2 | denovo895  | 1  | k_Bacteria:p_Proteobacteria:c_Betaproteobacteria:o_Burkholderiales:f_Comamonadaceae:g_                    |
| MID2 | denovo896  | 1  | k_Bacteria:p_Bacteroidetes:c_Bacteroidia:o_Bacteroidales:f_Prevotellaceae:g_Prevotella                    |
| MID2 | denovo9    | 1  | k_Bacteria:p_Actinobacteria:c_Thermoleophila:o_Gaiellales:f_Gaiellaceae:g_                                |
| MID2 | denovo91   | 3  | k_Bacteria:p_Proteobacteria:c_Alphaproteobacteria:o_Caulobacterales:f_Caulobacteraceae:g_Brevundimonas    |
| MID2 | denovo911  | 1  | k_Bacteria:p_Acidobacteria:c_[Chloracidobacteria]:o_RB41:f_Ellin6075:g_                                   |
| MID2 | denovo92   | 9  | k_Bacteria:p_Firmicutes:c_Bacilli:o_Lactobacillales:f_Lactobacillaceae:g_Lactobacillus                    |
| MID2 | denovo924  | 1  | k_Bacteria:p_Proteobacteria:c_Alphaproteobacteria:o_Sphingomonadales:f_Sphingomonadaceae:g_Sphingomonas   |
| MID2 | denovo935  | 1  | k_Bacteria:p_Proteobacteria:c_Gammaproteobacteria:o_Xanthomonadales:f_Xanthomonadaceae:g_Thermomonas      |
| MID2 | denovo942  | 1  | k_Bacteria:p_Proteobacteria:c_Gammaproteobacteria:o_Alteromonadales:f_[Chromatiaceae]:g_Rheinheimera      |
| MID2 | denovo95   | 3  | k_Bacteria:p_Bacteroidetes:c_Flavobacteriia:o_Flavobacteriales:f_[Weeksellaceae]:g_Chryseobacterium       |
| MID2 | denovo953  | 3  | k_Bacteria:p_Actinobacteria:c_Actinobacteria:o_Actinomycetales:f_Microbacteriaceae:g_Curtobacterium       |
| MID2 | denovo955  | 1  | k_Bacteria:p_Proteobacteria:c_Alphaproteobacteria:o_Rhizobiales:f_Methylobacteriaceae:g_Methylobacterium  |
| MID2 | denovo96   | 4  | k_Bacteria:p_Firmicutes:c_Clostridia:o_Clostridiales:f_[Tissierellaceae]:g_Anaerococcus                   |
| MID2 | denovo964  | 8  | k_Bacteria:p_Proteobacteria:c_Gammaproteobacteria:o_Pseudomonadales:f_Moraxellaceae:g_Acinetobacter       |
| MID2 | denovo965  | 2  | k_Bacteria:p_Firmicutes:c_Bacilli:o_Lactobacillales:f_Aerococcaceae:g_Facklamia                           |
| MID2 | denovo971  | 1  | k_Bacteria:p_Firmicutes:c_Clostridia:o_Clostridiales:f_Lachnospiraceae:g_                                 |
| MID2 | denovo977  | 1  | k_Bacteria:p_Cyanobacteria:c_Nostocophycideae:o_Stigonematales:f_Rivulariaceae:g_Calothrix                |
| MID2 | denovo980  | 2  | k_Bacteria:p_Actinobacteria:c_Thermoleophila:o_Solirubrobacterales:f_Solirubrobacteraceae:g_              |
| MID2 | denovo997  | 2  | k_Bacteria:p_Proteobacteria:c_Alphaproteobacteria:o_Sphingomonadales:f_Erythrobacteraceae:g_              |
| MID2 | denovo999  | 1  | k_Bacteria:p_Proteobacteria:c_Alphaproteobacteria:o_Rhizobiales:f_g_                                      |
| MID3 | denovo0    | 3  | k_Bacteria:p_Actinobacteria:c_Actinobacteria:o_Actinomycetales:f_Actinomycetaceae:g_Actinomycetes         |
| MID3 | denovo1    | 2  | k_Bacteria:p_Acidobacteria:c_Solibacteres:o_Solibacterales:f_g_                                           |
| MID3 | denovo1000 | 3  | k_Bacteria:p_Bacteroidetes:c_Flavobacteriia:o_Flavobacteriales:f_Flavobacteriaceae:g_Flavobacterium       |
| MID3 | denovo1002 | 1  | k_Bacteria:p_Firmicutes:c_Clostridia:o_Clostridiales:f_[Tissierellaceae]:g_Anaerococcus                   |
| MID3 | denovo1009 | 1  | k_Bacteria:p_Acidobacteria:c_[Chloracidobacteria]:o_RB41:f_Ellin6075:g_                                   |
| MID3 | denovo101  | 1  | k_Bacteria:p_Actinobacteria:c_Actinobacteria:o_Actinomycetales:f_Propionibacteriaceae:g_Propionibacterium |
| MID3 | denovo1011 | 1  | k_Bacteria:p_Planctomycetes:c_Planctomycetia:o_Pirellulales:f_Pirellulaceae:g_Pirellula                   |
| MID3 | denovo1014 | 11 | k_Bacteria:p_Proteobacteria:c_Alphaproteobacteria:o_Rhizobiales:f_Bradyrhizobiaceae:g_Balneimonas         |
| MID3 | denovo1016 | 1  | k_Bacteria:p_Firmicutes:c_Clostridia:o_Clostridiales:f_Lachnospiraceae:g_[Ruminococcus]                   |
| MID3 | denovo1018 | 10 | k_Bacteria:p_Firmicutes:c_Clostridia:o_Clostridiales:f_[Tissierellaceae]:g_Peptoniphilus                  |
| MID3 | denovo1026 | 4  | k_Bacteria:p_Proteobacteria:c_Gammaproteobacteria:o_Xanthomonadales:f_Xanthomonadaceae:g_Lysobacter       |
| MID3 | denovo1028 | 1  | k_Bacteria:p_Firmicutes:c_Bacilli:o_Bacillales:f_Staphylococcaceae:g_Staphylococcus                       |
| MID3 | denovo1033 | 1  | k_Bacteria:p_Firmicutes:c_Clostridia:o_Clostridiales:f_Ruminococcaceae:g_                                 |
| MID3 | denovo1037 | 1  | k_Bacteria:p_Actinobacteria:c_Actinobacteria:o_Actinomycetales:f_Corynebacteriaceae:g_Corynebacterium     |
| MID3 | denovo1043 | 1  | k_Bacteria:p_Firmicutes:c_Bacilli:o_Bacillales:f_Planococcaceae                                           |
| MID3 | denovo1044 | 6  | k_Bacteria:p_Firmicutes:c_Clostridia:o_Clostridiales:f_Lachnospiraceae:g_Coproccoccus                     |
| MID3 | denovo1045 | 3  | k_Bacteria:p_Actinobacteria:c_Actinobacteria:o_Actinomycetales:f_Micrococcaceae:g_Kocuria                 |
| MID3 | denovo1051 | 2  | k_Bacteria:p_Firmicutes:c_Clostridia:o_Clostridiales:f_g_                                                 |
| MID3 | denovo1054 | 8  | k_Bacteria:p_Firmicutes:c_Bacilli:o_Bacillales:f_Bacillaceae:g_Bacillus                                   |
| MID3 | denovo1059 | 9  | k_Bacteria:p_Actinobacteria:c_Actinobacteria:o_Actinomycetales:f_Microbacteriaceae:g_Microbacterium       |
| MID3 | denovo1064 | 4  | k_Bacteria:p_Proteobacteria:c_Alphaproteobacteria:o_Rhizobiales:f_Hyphomicrobiaceae:g_                    |
| MID3 | denovo107  | 1  | k_Bacteria:p_Proteobacteria:c_Alphaproteobacteria:o_Rhodobacterales:f_Rhodobacteraceae:g_Rubellimicrobium |
| MID3 | denovo1070 | 1  | k_Bacteria:p_Firmicutes:c_Clostridia:o_Clostridiales:f_[Tissierellaceae]:g_Anaerococcus                   |
| MID3 | denovo1071 | 5  | k_Bacteria:p_Bacteroidetes:c_Cytophagia:o_Cytophagales:f_Cytophagaceae:g_                                 |
| MID3 | denovo1073 | 1  | k_Bacteria:p_Proteobacteria:c_Gammaproteobacteria:o_Xanthomonadales:f_Xanthomonadaceae:g_Stenotrophomonas |
| MID3 | denovo1074 | 1  | k_Bacteria:p_Proteobacteria:c_Alphaproteobacteria:o_Rhodobacterales:f_Rhodobacteraceae:g_Rubellimicrobium |
| MID3 | denovo1076 | 2  | k_Bacteria:p_Bacteroidetes:c_Bacteroidia:o_Bacteroidales:f_[Paraprevotellaceae]:g_CF231                   |
| MID3 | denovo1077 | 1  | k_Bacteria:p_Proteobacteria:c_Alphaproteobacteria:o_Rhizobiales:f_Hyphomicrobiaceae:g_Devosia             |
| MID3 | denovo1082 | 2  | k_Bacteria:p_Firmicutes:c_Clostridia:o_Clostridiales:f_Clostridiaceae:g_Clostridium                       |
| MID3 | denovo1085 | 1  | k_Bacteria:p_Actinobacteria:c_Acidimicrobia:o_Acidimicrobiales:f_C111:g_                                  |
| MID3 | denovo1086 | 6  | k_Bacteria:p_Actinobacteria:c_Actinobacteria:o_Actinomycetales:f_Nocardiodiaceae:g_                       |
| MID3 | denovo1089 | 1  | k_Bacteria:p_Proteobacteria:c_Alphaproteobacteria:o_Rhodospirillales:f_Acetobacteraceae:g_                |
| MID3 | denovo109  | 6  | k_Bacteria:p_Proteobacteria:c_Gammaproteobacteria:o_Enterobacteriales:f_Enterobacteriaceae                |
| MID3 | denovo1090 | 5  | k_Bacteria:p_Proteobacteria:c_Alphaproteobacteria:o_Rhodobacterales:f_Rhodobacteraceae:g_Amaricoccus      |
| MID3 | denovo1094 | 3  | k_Bacteria:p_Firmicutes:c_Bacilli:o_Lactobacillales:f_Aerococcaceae:g_Facklamia                           |
| MID3 | denovo1101 | 1  | k_Bacteria:p_Proteobacteria:c_Alphaproteobacteria:o_Rhodobacterales:f_Rhodobacteraceae:g_Rubellimicrobium |
| MID3 | denovo1108 | 2  | k_Bacteria:p_Proteobacteria:c_Alphaproteobacteria:o_Caulobacterales:f_Caulobacteraceae                    |
| MID3 | denovo1110 | 1  | k_Bacteria:p_Bacteroidetes:c_Flavobacteriia:o_Flavobacteriales:f_Flavobacteriaceae:g_Flavobacterium       |
| MID3 | denovo1114 | 1  | k_Bacteria:p_Proteobacteria:c_Alphaproteobacteria:o_Rhizobiales:f_Bradyrhizobiaceae:g_                    |
| MID3 | denovo1116 | 1  | k_Bacteria:p_Proteobacteria:c_Alphaproteobacteria:o_Rhodospirillales:f_Acetobacteraceae:g_                |
| MID3 | denovo1120 | 1  | k_Bacteria:p_Firmicutes:c_Clostridia:o_Clostridiales:f_[Tissierellaceae]:g_Helcococcus                    |
| MID3 | denovo1123 | 2  | k_Bacteria:p_Proteobacteria:c_Alphaproteobacteria:o_Sphingomonadales:f_Sphingomonadaceae:g_Sphingomonas   |

|      |            |    |                                                                                                           |
|------|------------|----|-----------------------------------------------------------------------------------------------------------|
| MID3 | denovo1125 | 1  | k_Bacteria:p_Acidobacteria:c_[Chloracidobacteria]:o_RB41:f_Ellin6075:g__                                  |
| MID3 | denovo1130 | 1  | k_Bacteria:p_Proteobacteria:c_Alphaproteobacteria:o_Rhodospirillales:f_Rhodospirillaceae:g__              |
| MID3 | denovo1131 | 2  | k_Bacteria:p_Actinobacteria:c_Actinobacteria:o_Actinomycetales:f_Sanguibacteraceae:g_Sanguibacter         |
| MID3 | denovo1132 | 2  | k_Bacteria:p_Firmicutes:c_Bacilli:o_Lactobacillales:f_Enterococcaceae:g_Vagococcus                        |
| MID3 | denovo1137 | 2  | k_Bacteria:p_Proteobacteria:c_Alphaproteobacteria:o_BD7-3:f__g__                                          |
| MID3 | denovo1139 | 1  | k_Bacteria:p_Actinobacteria:c_Thermoleophila:o_Solirubrobacterales:f__g__                                 |
| MID3 | denovo114  | 4  | k_Bacteria:p_Cyanobacteria:c_Chloroplast:o_Chlorophyta:f__g__                                             |
| MID3 | denovo1141 | 1  | k_Bacteria:p_Firmicutes:c_Bacilli:o_Lactobacillales                                                       |
| MID3 | denovo1145 | 4  | k_Bacteria:p_Proteobacteria:c_Alphaproteobacteria:o_Rhodospirillales:f_Rhodospirillaceae:g__              |
| MID3 | denovo1146 | 1  | k_Bacteria:p_Proteobacteria:c_Gammaproteobacteria:o_Legionellales:f_Coxiellaceae:g__                      |
| MID3 | denovo1147 | 1  | k_Bacteria:p_Proteobacteria:c_Deltaproteobacteria:o_Myxococcales:f__g__                                   |
| MID3 | denovo1148 | 3  | k_Bacteria:p_Firmicutes:c_Clostridia:o_Clostridiales:f_Lachnospiraceae:g__                                |
| MID3 | denovo1150 | 1  | k_Bacteria:p_Firmicutes:c_Clostridia:o_Clostridiales:f_Lachnospiraceae:g_Roseburia                        |
| MID3 | denovo1153 | 3  | k_Bacteria:p_Cyanobacteria:c_Nostocophycideae:o_Stigonematales:f_Rivulariaceae:g_Calothrix                |
| MID3 | denovo1155 | 1  | k_Bacteria:p_Firmicutes:c_Bacilli:o_Bacillales:f_Bacillaceae:g_Bacillus                                   |
| MID3 | denovo116  | 1  | k_Bacteria:p_Firmicutes:c_Bacilli:o_Lactobacillales:f_Streptococcaceae:g_Streptococcus                    |
| MID3 | denovo1160 | 1  | k_Bacteria:p_Proteobacteria:c_Deltaproteobacteria:o_Spirobacillales:f__g__                                |
| MID3 | denovo1161 | 2  | k_Bacteria:p_Firmicutes:c_Bacilli:o_Bacillales:f_Staphylococcaceae:g_Salinicoccus                         |
| MID3 | denovo1165 | 7  | k_Bacteria:p_Firmicutes:c_Clostridia:o_Clostridiales:f_[Tissierellaceae]:g_Anaerococcus                   |
| MID3 | denovo1170 | 1  | k_Bacteria:p_Actinobacteria:c_Actinobacteria:o_Actinomycetales:f_Dermacoccaceae:g_Dermacoccus             |
| MID3 | denovo1171 | 2  | k_Bacteria:p_Proteobacteria:c_Gammaproteobacteria:o_Xanthomonadales:f_Xanthomonadaceae:g_Luteimonas       |
| MID3 | denovo1172 | 1  | k_Bacteria:p_Firmicutes:c_Bacilli:o_Bacillales:f_Paenibacillaceae:g_Cohnella                              |
| MID3 | denovo1173 | 6  | k_Bacteria:p_Proteobacteria:c_Alphaproteobacteria:o_Rhodobacterales:f_Rhodobacteraceae:g_Paracoccus       |
| MID3 | denovo1184 | 7  | k_Bacteria:p_Proteobacteria:c_Alphaproteobacteria:o_Rhizobiales:f_Phyllobacteriaceae:g__                  |
| MID3 | denovo119  | 1  | k_Bacteria:p_Proteobacteria:c_Alphaproteobacteria:o_Sphingomonadales:f_Sphingomonadaceae:g_Kaistobacter   |
| MID3 | denovo1191 | 1  | k_Bacteria:p_Plantcomycetes:c_Plantcomycetia:o_Gemmatales:f_Isosphaeraceae:g__                            |
| MID3 | denovo1199 | 1  | k_Bacteria:p_Actinobacteria:c_Acidimicrobia:o_Acidimicrobiales:f_C111:g__                                 |
| MID3 | denovo1200 | 1  | k_Bacteria:p_Chloroflexi:c_Anaerolineae:o_WCHB1-50:f__g__                                                 |
| MID3 | denovo1201 | 2  | k_Bacteria:p_Proteobacteria:c_Alphaproteobacteria:o_Rickettsiales:f_Rickettsiaceae:g_Rickettsia           |
| MID3 | denovo1202 | 29 | k_Bacteria:p_Proteobacteria:c_Alphaproteobacteria:o_Rhizobiales:f_Methylobacteriaceae:g_Methylobacterium  |
| MID3 | denovo1206 | 1  | k_Bacteria:p_Plantcomycetes:c_Plantcomycetia:o_Plantcomycetales:f_Plantcomycetaceae:g_Plantcomyces        |
| MID3 | denovo1207 | 1  | k_Bacteria:p_Proteobacteria:c_Betaproteobacteria:o_SBl14:f__g__                                           |
| MID3 | denovo1210 | 2  | k_Bacteria:p_Plantcomycetes:c_vadinHA49:o_DH61:f__g__                                                     |
| MID3 | denovo1216 | 1  | k_Bacteria:p_Actinobacteria:c_MB-A2-108:o_0319-7L14:f__g__                                                |
| MID3 | denovo1217 | 1  | k_Bacteria:p_Cyanobacteria:c_Chloroplast:o_Chlorophyta:f__g__                                             |
| MID3 | denovo1223 | 1  | k_Bacteria:p_Proteobacteria:c_Gammaproteobacteria:o_Enterobacterales:f_Enterobacteriaceae:g_Dickeya       |
| MID3 | denovo1225 | 1  | k_Bacteria:p_Proteobacteria:c_Alphaproteobacteria:o_Rhizobiales:f_Phyllobacteriaceae:g_Mesorhizobium      |
| MID3 | denovo1227 | 1  | k_Bacteria:p_Proteobacteria:c_Alphaproteobacteria:o_Rhizobiales:f_Rhizobiaceae                            |
| MID3 | denovo1230 | 1  | k_Bacteria:p_Proteobacteria:c_Betaproteobacteria:o_Burkholderiales:f_Comamonadaceae:g_Comamonas           |
| MID3 | denovo1231 | 3  | k_Bacteria:p_Proteobacteria:c_Alphaproteobacteria:o_Rhodobacterales:f_Rhodobacteraceae:g_Rubellimicrobium |
| MID3 | denovo1233 | 1  | k_Bacteria:p_Actinobacteria:c_Actinobacteria:o_Actinomycetales:f_Nocardioideae:g_Nocardioides             |
| MID3 | denovo1235 | 1  | k_Bacteria:p_Firmicutes:c_Clostridia:o_Clostridiales:f_Clostridiaceae:g_Clostridium                       |
| MID3 | denovo1236 | 3  | k_Bacteria:p_Bacteroidetes:c_Cytophagia:o_Cytophagales:f_Cytophagaceae:g_Rhodocytophaga                   |
| MID3 | denovo1237 | 1  | k_Bacteria:p_Firmicutes:c_Clostridia:o_Clostridiales:f_Ruminococcaceae:g__                                |
| MID3 | denovo1238 | 2  | k_Bacteria:p_Proteobacteria:c_Gammaproteobacteria:o_Legionellales:f_Coxiellaceae:g__                      |
| MID3 | denovo124  | 1  | k_Bacteria:p_Firmicutes:c_Clostridia:o_Clostridiales:f_Christensenellaceae:g__                            |
| MID3 | denovo1248 | 4  | k_Bacteria:p_Proteobacteria:c_Alphaproteobacteria:o_Rhodospirillales:f_Rhodospirillaceae:g__              |
| MID3 | denovo1253 | 4  | k_Bacteria:p_Proteobacteria:c_Alphaproteobacteria:o_Rhizobiales:f_Rhizobiaceae:g_Agrobacterium            |
| MID3 | denovo1255 | 1  | k_Bacteria:p_Bacteroidetes:c_Bacteroidia:o_Bacteroidales:f_Prevotellaceae:g_Prevotella                    |
| MID3 | denovo1257 | 7  | k_Bacteria:p_Proteobacteria:c_Alphaproteobacteria:o_Sphingomonadales:f_Sphingomonadaceae                  |
| MID3 | denovo126  | 3  | k_Bacteria:p_Proteobacteria:c_Alphaproteobacteria:o_Rhizobiales:f_Hyphomicrobiaceae:g_Rhodoplanes         |
| MID3 | denovo1260 | 1  | k_Bacteria:p_Plantcomycetes:c_Plantcomycetia:o_Gemmatales:f_Gemmataceae:g_Gemmata                         |
| MID3 | denovo1265 | 2  | k_Bacteria:p_Firmicutes:c_Bacilli:o_Lactobacillales:f_Lactobacillaceae:g_Lactobacillus                    |
| MID3 | denovo1267 | 3  | k_Bacteria:p_Proteobacteria:c_Alphaproteobacteria:o_Rickettsiales:f__g__                                  |
| MID3 | denovo1269 | 1  | k_Bacteria:p_Proteobacteria:c_Gammaproteobacteria:o_Thiotrichales:f_Piscirickettsiaceae:g__               |
| MID3 | denovo127  | 1  | k_Bacteria:p_Proteobacteria:c_Gammaproteobacteria:o_Pseudomonadales:f_Pseudomonadaceae:g__                |
| MID3 | denovo1270 | 1  | k_Bacteria:p_Proteobacteria:c_Alphaproteobacteria:o_Rhizobiales:f_Methylocystaceae:g_Methylophila         |
| MID3 | denovo1271 | 3  | k_Bacteria:p_Cyanobacteria:c_4C0d-2:o_MLE1-12:f__g__                                                      |
| MID3 | denovo1276 | 1  | k_Bacteria:p_Actinobacteria:c_Actinobacteria:o_Actinomycetales:f_Williamsiaceae:g_Williamsia              |
| MID3 | denovo1277 | 6  | k_Bacteria:p_Firmicutes:c_Bacilli:o_Bacillales:f_Paenibacillaceae:g_Paenibacillus                         |
| MID3 | denovo1279 | 4  | k_Bacteria:p_Firmicutes:c_Bacilli:o_Lactobacillales                                                       |
| MID3 | denovo1280 | 1  | k_Bacteria:p_Proteobacteria:c_Gammaproteobacteria:o_Pseudomonadales:f_Pseudomonadaceae:g_Pseudomonas      |
| MID3 | denovo1287 | 2  | k_Bacteria:p_Actinobacteria:c_Actinobacteria:o_Actinomycetales:f_Corynebacteriaceae:g_Corynebacterium     |
| MID3 | denovo1288 | 3  | k_Bacteria:p_Firmicutes:c_Clostridia:o_Clostridiales:f_Lachnospiraceae:g__                                |
| MID3 | denovo1290 | 4  | k_Bacteria:p_Actinobacteria:c_Actinobacteria:o_Actinomycetales:f_Dermabacteraceae:g_Brachybacterium       |
| MID3 | denovo1292 | 3  | k_Bacteria:p_Proteobacteria:c_Alphaproteobacteria:o_Rhodospirillales:f_Acetobacteraceae:g__               |
| MID3 | denovo1293 | 2  | k_Bacteria:p_Firmicutes:c_Clostridia:o_Clostridiales:f__g__                                               |

|      |            |    |                                                                                                                  |
|------|------------|----|------------------------------------------------------------------------------------------------------------------|
| MID3 | denovo13   | 4  | k__Bacteria:p__Actinobacteria:c__Actinobacteria:o__Actinomycetales:f__Corynebacteriaceae:g__Corynebacterium      |
| MID3 | denovo130  | 1  | k__Bacteria:p__Planctomycetes:c__Planctomycetia:o__Gemmatales:f__Gemmataceae:g__                                 |
| MID3 | denovo1300 | 13 | k__Bacteria:p__Actinobacteria:c__Actinobacteria:o__Actinomycetales:f__Nocardioidaceae:g__Friedmannella           |
| MID3 | denovo1301 | 2  | k__Bacteria:p__Actinobacteria:c__Coriobacterii:a__Coriobacteriales:f__Coriobacteriaceae:g__Collinsella           |
| MID3 | denovo1303 | 1  | k__Bacteria:p__Actinobacteria:c__Actinobacteria:o__Actinomycetales:f__Propionibacteriaceae:g__                   |
| MID3 | denovo1308 | 12 | k__Bacteria:p__Firmicutes:c__Bacilli:o__Lactobacillales:f__Streptococcaceae:g__Streptococcus                     |
| MID3 | denovo1309 | 1  | k__Bacteria:p__Proteobacteria:c__Alphaproteobacteria:o__Rhodospirillales:f__Rhodospirillaceae:g__                |
| MID3 | denovo1312 | 1  | k__Bacteria:p__Proteobacteria:c__Betaproteobacteria:o__Burkholderiales:f__Oxalobacteraceae:g__                   |
| MID3 | denovo1317 | 2  | k__Bacteria:p__Firmicutes:c__Bacilli:o__Lactobacillales:f__Aerococcaceae:g__Alloiooccus                          |
| MID3 | denovo1318 | 3  | k__Bacteria:p__Cyanobacteria:c__Chloroplast:o__Chlorophyta:f__Trebouxiophyceae:g__Coccomyxa                      |
| MID3 | denovo1319 | 1  | k__Bacteria:p__Proteobacteria:c__Alphaproteobacteria:o__Sphingomonadales:f__Sphingomonadaceae:g__Kaistobacter    |
| MID3 | denovo1322 | 1  | k__Bacteria:p__Proteobacteria:c__Alphaproteobacteria:o__Rhodospirillales:f__Rhodospirillaceae:g__                |
| MID3 | denovo1323 | 7  | k__Bacteria:p__Proteobacteria:c__Alphaproteobacteria:o__Rhizobiales:f__Methylocystaceae:g__                      |
| MID3 | denovo1324 | 4  | k__Bacteria:p__Proteobacteria:c__Alphaproteobacteria:o__Rhodospirillales:f__Acetobacteraceae:g__                 |
| MID3 | denovo1328 | 3  | k__Bacteria:p__Firmicutes:c__Clostridia:o__Clostridiales:f__Lachnospiraceae:g__Coproccoccus                      |
| MID3 | denovo1329 | 1  | k__Bacteria:p__Acidobacteria:c__[Chloracidobacteria]:o__RB41:f__Ellin6075:g__                                    |
| MID3 | denovo133  | 3  | k__Bacteria:p__Bacteroidetes:c__Bacteroidia:o__Bacteroidales:f__Porphyromonadaceae:g__Candidatus_Azobacteroides  |
| MID3 | denovo1334 | 55 | k__Bacteria:p__Firmicutes:c__Bacilli:o__Lactobacillales:f__Streptococcaceae:g__Streptococcus                     |
| MID3 | denovo1335 | 3  | k__Bacteria:p__Proteobacteria:c__Gammaproteobacteria:o__Legionellales:f__Legionellaceae:g__                      |
| MID3 | denovo1336 | 1  | k__Bacteria:p__Actinobacteria:c__Acidimicrobiia:o__Acidimicrobiales:f__C111:g__                                  |
| MID3 | denovo134  | 47 | k__Bacteria:p__Firmicutes:c__Bacilli:o__Lactobacillales:f__g__                                                   |
| MID3 | denovo1341 | 13 | k__Bacteria:p__Firmicutes:c__Clostridia:o__Clostridiales:f__[Tissierellaceae]:g__Anaerococcus                    |
| MID3 | denovo1342 | 1  | k__Bacteria:p__Actinobacteria:c__Actinobacteria:o__Actinomycetales:f__Intrasporangiaceae                         |
| MID3 | denovo1345 | 3  | k__Bacteria:p__Firmicutes:c__Bacilli:o__Bacillales:f__Alicyclobacillaceae:g__Alicyclobacillus                    |
| MID3 | denovo1346 | 11 | k__Bacteria:p__Firmicutes:c__Bacilli:o__Lactobacillales:f__Streptococcaceae:g__Lactococcus                       |
| MID3 | denovo1347 | 2  | k__Bacteria:p__Proteobacteria:c__Gammaproteobacteria:o__Xanthomonadales:f__Xanthomonadaceae:g__Luteibacter       |
| MID3 | denovo1349 | 9  | k__Bacteria:p__Proteobacteria:c__Deltaproteobacteria:o__Myxococcales:f__Nannocystaceae:g__Nannocystis            |
| MID3 | denovo135  | 1  | k__Bacteria:p__Firmicutes:c__Clostridia:o__Clostridiales:f__Clostridiaceae:g__Clostridium                        |
| MID3 | denovo1357 | 2  | k__Bacteria:p__Proteobacteria:c__Alphaproteobacteria:o__Rhodospirillales:f__Rhodospirillaceae:g__                |
| MID3 | denovo138  | 13 | k__Bacteria:p__Proteobacteria:c__Alphaproteobacteria:o__Rhodospirillales:f__Rhodospirillaceae:g__Skermanella     |
| MID3 | denovo140  | 1  | k__Bacteria:p__Proteobacteria:c__Alphaproteobacteria:o__Caulobacterales:f__Caulobacteraceae:g__                  |
| MID3 | denovo148  | 1  | k__Bacteria:p__Cyanobacteria:c__Synechococcophycideae:o__Pseudanabaenales:f__Pseudanabaenaceae:g__Leptolyngbya   |
| MID3 | denovo149  | 1  | k__Bacteria:p__Actinobacteria:c__Actinobacteria:o__Actinomycetales:f__Cellulomonadaceae:g__Cellulomonas          |
| MID3 | denovo15   | 2  | k__Bacteria:p__[Thermi]:c__Deinococci:o__Deinococcales:f__Trueperaceae:g__Truepera                               |
| MID3 | denovo152  | 1  | k__Bacteria:p__Actinobacteria:c__Thermoleophila:o__Solirubrobacterales:f__g__                                    |
| MID3 | denovo153  | 1  | k__Bacteria:p__Chlorobi:c__SJA-28:o__f__g__                                                                      |
| MID3 | denovo155  | 1  | k__Bacteria:p__Proteobacteria:c__Alphaproteobacteria:o__Rhodobacterales:f__Rhodobacteraceae:g__Rubellimicrobium  |
| MID3 | denovo157  | 1  | k__Bacteria:p__Proteobacteria:c__Alphaproteobacteria:o__Rhodospirillales:f__g__                                  |
| MID3 | denovo160  | 1  | k__Bacteria:p__Gemmatimonadetes:c__Gemm-3:o__f__g__                                                              |
| MID3 | denovo161  | 2  | k__Bacteria:p__Bacteroidetes:c__Bacteroidia:o__Bacteroidales:f__Porphyromonadaceae:g__Candidatus_Azobacteroides  |
| MID3 | denovo162  | 2  | k__Bacteria:p__Bacteroidetes:c__Bacteroidia:o__Bacteroidales:f__Bacteroidaceae:g__Bacteroides                    |
| MID3 | denovo164  | 1  | k__Bacteria:p__Proteobacteria:c__Gammaproteobacteria:o__Pseudomonadales:f__Moraxellaceae:g__Psychrobacter        |
| MID3 | denovo168  | 2  | k__Bacteria:p__Firmicutes:c__Bacilli:o__Lactobacillales:f__Streptococcaceae:g__Streptococcus                     |
| MID3 | denovo169  | 1  | k__Bacteria:p__Actinobacteria:c__Acidimicrobiia:o__Acidimicrobiales:f__g__                                       |
| MID3 | denovo17   | 1  | k__Bacteria:p__Firmicutes:c__Clostridia:o__Clostridiales:f__Veillonellaceae                                      |
| MID3 | denovo170  | 2  | k__Bacteria:p__Firmicutes:c__Clostridia:o__Clostridiales:f__[Tissierellaceae]:g__Anaerococcus                    |
| MID3 | denovo176  | 2  | k__Bacteria:p__Proteobacteria:c__Alphaproteobacteria:o__Sphingomonadales:f__Sphingomonadaceae:g__                |
| MID3 | denovo178  | 4  | k__Bacteria:p__Bacteroidetes:c__[Rhodothermi]:o__[Rhodothermales]:f__Rhodothermaceae:g__Rubricoccus              |
| MID3 | denovo179  | 1  | k__Bacteria:p__Proteobacteria:c__Alphaproteobacteria:o__Sphingomonadales:f__Sphingomonadaceae:g__Sphingomonas    |
| MID3 | denovo18   | 1  | k__Bacteria:p__Proteobacteria:c__Gammaproteobacteria:o__Pseudomonadales:f__Pseudomonadaceae:g__Pseudomonas       |
| MID3 | denovo180  | 1  | k__Bacteria:p__Proteobacteria:c__Alphaproteobacteria:o__Caulobacterales:f__Caulobacteraceae:g__Phenyllobacterium |
| MID3 | denovo182  | 1  | k__Bacteria:p__Proteobacteria:c__Alphaproteobacteria:o__Rhodospirillales:f__Acetobacteraceae:g__                 |
| MID3 | denovo183  | 67 | k__Bacteria:p__Cyanobacteria:c__Oscillatoriophyceae:o__Chroococcales:f__Xenococcaceae                            |
| MID3 | denovo184  | 24 | k__Bacteria:p__Firmicutes:c__Clostridia:o__Clostridiales:f__[Tissierellaceae]:g__Peptoniphilus                   |
| MID3 | denovo185  | 13 | k__Bacteria:p__Proteobacteria:c__Gammaproteobacteria:o__Xanthomonadales:f__Xanthomonadaceae:g__                  |
| MID3 | denovo186  | 2  | k__Bacteria:p__Proteobacteria:c__Alphaproteobacteria:o__Rhizobiales:f__Bradyrhizobiaceae:g__Balneimonas          |
| MID3 | denovo187  | 1  | k__Bacteria:p__Firmicutes:c__Clostridia:o__Clostridiales:f__Clostridiaceae:g__                                   |
| MID3 | denovo189  | 1  | k__Bacteria:p__Actinobacteria:c__Actinobacteria:o__Actinomycetales:f__g__                                        |
| MID3 | denovo192  | 1  | k__Bacteria:p__Proteobacteria:c__Alphaproteobacteria:o__Rhodospirillales:f__Rhodospirillaceae:g__Azospirillum    |
| MID3 | denovo193  | 3  | k__Bacteria:p__Proteobacteria:c__Alphaproteobacteria:o__Caulobacterales:f__Caulobacteraceae:g__Phenyllobacterium |
| MID3 | denovo195  | 2  | k__Bacteria:p__Firmicutes:c__Bacilli:o__Bacillales:f__Paenibacillaceae:g__Saccharibacillus                       |
| MID3 | denovo2    | 1  | k__Bacteria:p__Proteobacteria:c__Betaproteobacteria:o__Burkholderiales:f__Oxalobacteraceae:g__                   |
| MID3 | denovo201  | 2  | k__Bacteria:p__Firmicutes:c__Clostridia:o__Clostridiales:f__Peptostreptococcaceae:g__Peptostreptococcus          |
| MID3 | denovo207  | 2  | k__Bacteria:p__Actinobacteria:c__Acidimicrobiia:o__Acidimicrobiales:f__C111:g__                                  |
| MID3 | denovo208  | 1  | Unassigned                                                                                                       |
| MID3 | denovo210  | 3  | k__Bacteria:p__Proteobacteria:c__Gammaproteobacteria:o__Xanthomonadales:f__Xanthomonadaceae:g__                  |
| MID3 | denovo213  | 2  | k__Bacteria:p__Proteobacteria:c__Gammaproteobacteria:o__Xanthomonadales:f__Xanthomonadaceae:g__Luteimonas        |

|      |           |    |                                                                                                                   |
|------|-----------|----|-------------------------------------------------------------------------------------------------------------------|
| MID3 | denovo214 | 1  | k_Bacteria:p__Proteobacteria:c__Alphaproteobacteria:o__Rhizobiales:f__Methylobacteriaceae:g__                     |
| MID3 | denovo218 | 2  | k_Bacteria:p__Cyanobacteria:c__Oscillatoriophycideae:o__Oscillatoriales:f__Phormidiaceae:g__Phormidium            |
| MID3 | denovo221 | 3  | k_Bacteria:p__Proteobacteria:c__Alphaproteobacteria:o__f__g__                                                     |
| MID3 | denovo225 | 3  | k_Bacteria:p__Proteobacteria:c__Gammaproteobacteria:o__Alteromonadales:f__211ds20:g__                             |
| MID3 | denovo228 | 2  | k_Bacteria:p__Proteobacteria:c__Alphaproteobacteria:o__Sphingomonadales:f__Sphingomonadaceae:g__Sphingomonas      |
| MID3 | denovo229 | 6  | k_Bacteria:p__Proteobacteria:c__Alphaproteobacteria:o__Rhodospirillales:f__Acetobacteraceae:g__                   |
| MID3 | denovo231 | 1  | k_Bacteria:p__Proteobacteria:c__Deltaproteobacteria:o__Myxococcales:f__g__                                        |
| MID3 | denovo232 | 16 | k_Bacteria:p__Firmicutes:c__Clostridia:o__Clostridiales:f__[Tissierellaceae]:g__Anaerococcus                      |
| MID3 | denovo234 | 2  | k_Bacteria:p__Proteobacteria:c__Alphaproteobacteria:o__Rhizobiales:f__Bradyrhizobiaceae:g__                       |
| MID3 | denovo236 | 2  | k_Bacteria:p__Actinobacteria:c__Actinobacteria:o__Actinomycetales:f__Geodermatophilaceae:g__                      |
| MID3 | denovo24  | 1  | k_Bacteria:p__Firmicutes:c__Clostridia:o__Clostridiales:f__[Tissierellaceae]:g__Anaerococcus                      |
| MID3 | denovo248 | 2  | k_Bacteria:p__Proteobacteria:c__Alphaproteobacteria:o__Rhodobacterales:f__Rhodobacteraceae:g__Rubellimicrobium    |
| MID3 | denovo254 | 2  | k_Bacteria:p__Firmicutes:c__Clostridia:o__MBA08:f__g__                                                            |
| MID3 | denovo255 | 3  | k_Bacteria:p__Proteobacteria:c__Alphaproteobacteria:o__Rhizobiales:f__Beijerinckiaceae:g__                        |
| MID3 | denovo264 | 1  | k_Bacteria:p__Proteobacteria:c__Alphaproteobacteria:o__Rhodospirillales:f__Acetobacteraceae:g__                   |
| MID3 | denovo27  | 1  | k_Bacteria:p__Proteobacteria:c__Deltaproteobacteria:o__Myxococcales:f__g__                                        |
| MID3 | denovo270 | 1  | k_Bacteria:p__Proteobacteria:c__Alphaproteobacteria:o__Rhizobiales:f__Methylobacteriaceae:g__                     |
| MID3 | denovo272 | 2  | k_Bacteria:p__Proteobacteria:c__Alphaproteobacteria:o__Rhodobacterales:f__Rhodobacteraceae:g__Rubellimicrobium    |
| MID3 | denovo273 | 2  | k_Bacteria:p__Planctomycetes:c__Planctomycetia:o__Planctomycetales:f__Planctomycetaceae:g__Planctomyces           |
| MID3 | denovo275 | 1  | k_Bacteria:p__Proteobacteria:c__Alphaproteobacteria:o__Rhizobiales:f__g__                                         |
| MID3 | denovo277 | 1  | Unassigned                                                                                                        |
| MID3 | denovo285 | 1  | k_Bacteria:p__Actinobacteria:c__Actinobacteria:o__Actinomycetales:f__Nocardiodiaceae:g__                          |
| MID3 | denovo286 | 2  | k_Bacteria:p__Actinobacteria:c__Actinobacteria:o__Actinomycetales:f__Frankiaceae:g__                              |
| MID3 | denovo288 | 3  | k_Bacteria:p__Proteobacteria:c__Alphaproteobacteria:o__Caulobacterales:f__Caulobacteraceae:g__                    |
| MID3 | denovo290 | 2  | k_Bacteria:p__Proteobacteria:c__Alphaproteobacteria:o__Sphingomonadales:f__Sphingomonadaceae:g__                  |
| MID3 | denovo291 | 1  | k_Bacteria:p__Proteobacteria:c__Betaproteobacteria:o__Burkholderiales:f__Comamonadaceae:g__Delftia                |
| MID3 | denovo292 | 1  | k_Bacteria:p__Firmicutes:c__Clostridia:o__Clostridiales:f__Ruminococcaceae:g__                                    |
| MID3 | denovo295 | 2  | k_Bacteria:p__Proteobacteria:c__Alphaproteobacteria:o__Rhizobiales:f__Rhizobiaceae:g__Kaistia                     |
| MID3 | denovo296 | 3  | k_Bacteria:p__Firmicutes:c__Clostridia:o__Clostridiales:f__[Tissierellaceae]:g__WAL_1855D                         |
| MID3 | denovo298 | 1  | k_Bacteria:p__Cyanobacteria:c__Oscillatoriophycideae:o__Oscillatoriales:f__Phormidiaceae:g__Phormidium            |
| MID3 | denovo299 | 1  | k_Bacteria:p__Firmicutes:c__Clostridia:o__f__g__                                                                  |
| MID3 | denovo303 | 1  | k_Bacteria:p__Bacteroidetes:c__Bacteroidia:o__Bacteroidales:f__[Paraprevotellaceae]:g__[Prevotella]               |
| MID3 | denovo305 | 1  | k_Bacteria:p__Proteobacteria:c__Alphaproteobacteria:o__Rhizobiales:f__Methylocystaceae:g__Methylosinus            |
| MID3 | denovo31  | 1  | k_Bacteria:p__Proteobacteria:c__Alphaproteobacteria:o__Rhodospirillales:f__Rhodospirillaceae:g__Magnetospirillum  |
| MID3 | denovo313 | 2  | k_Bacteria:p__Proteobacteria:c__Gammaproteobacteria:o__Vibrionales:f__Pseudoalteromonadaceae:g__Pseudoalteromonas |
| MID3 | denovo314 | 4  | k_Bacteria:p__Proteobacteria:c__Alphaproteobacteria:o__Rhizobiales:f__Beijerinckiaceae:g__                        |
| MID3 | denovo315 | 7  | k_Bacteria:p__Proteobacteria:c__Alphaproteobacteria:o__Rhizobiales:f__Rhizobiaceae:g__Rhizobium                   |
| MID3 | denovo319 | 1  | k_Bacteria:p__Bacteroidetes:c__Flavobacteriia:o__Flavobacteriales:f__[Weeksellaceae]:g__Chryseobacterium          |
| MID3 | denovo323 | 2  | k_Bacteria:p__Proteobacteria:c__Gammaproteobacteria:o__Pseudomonadales:f__Pseudomonadaceae:g__Pseudomonas         |
| MID3 | denovo324 | 3  | k_Bacteria:p__Proteobacteria:c__Alphaproteobacteria:o__Rhizobiales:f__Hyphomicrobiaceae:g__Devosia                |
| MID3 | denovo325 | 1  | k_Bacteria:p__Firmicutes:c__Clostridia:o__Clostridiales:f__[Tissierellaceae]:g__Anaerococcus                      |
| MID3 | denovo327 | 1  | k_Bacteria:p__Actinobacteria:c__Actinobacteria:o__Actinomycetales:f__Pseudonocardiaceae:g__Pseudonocardia         |
| MID3 | denovo331 | 2  | k_Bacteria:p__Cyanobacteria:c__ML635J-21:o__f__g__                                                                |
| MID3 | denovo332 | 1  | k_Bacteria:p__Chloroflexi:c__Anaerolineae:o__SBR1031:f__A4b:g__                                                   |
| MID3 | denovo333 | 2  | k_Bacteria:p__Firmicutes:c__Bacilli:o__Bacillales:f__Bacillaceae:g__Bacillus                                      |
| MID3 | denovo334 | 1  | k_Bacteria:p__Proteobacteria:c__Alphaproteobacteria:o__Rhodobacterales:f__Rhodobacteraceae                        |
| MID3 | denovo335 | 2  | k_Bacteria:p__Actinobacteria:c__Actinobacteria:o__Actinomycetales:f__Micrococcaceae:g__Arthrobacter               |
| MID3 | denovo337 | 4  | k_Bacteria:p__Proteobacteria:c__Alphaproteobacteria:o__Rhizobiales:f__Aurantimonadaceae:g__                       |
| MID3 | denovo34  | 1  | k_Bacteria:p__Proteobacteria:c__Gammaproteobacteria:o__Xanthomonadales:f__Xanthomonadaceae:g__Dokdonella          |
| MID3 | denovo340 | 3  | k_Bacteria:p__Cyanobacteria:c__Chloroplast:o__Chlorophyta:f__g__                                                  |
| MID3 | denovo348 | 1  | k_Bacteria:p__Proteobacteria:c__Alphaproteobacteria:o__Rhodospirillales:f__Rhodospirillaceae:g__                  |
| MID3 | denovo349 | 2  | k_Bacteria:p__Proteobacteria:c__Alphaproteobacteria:o__Sphingomonadales:f__Erythrobacteraceae:g__                 |
| MID3 | denovo35  | 12 | k_Bacteria:p__Proteobacteria:c__Deltaproteobacteria:o__Myxococcales:f__Hallangiaceae:g__                          |
| MID3 | denovo353 | 9  | k_Bacteria:p__Proteobacteria:c__Alphaproteobacteria:o__Rhodobacterales:f__Rhodobacteraceae:g__Rubellimicrobium    |
| MID3 | denovo357 | 2  | k_Bacteria:p__Actinobacteria:c__Actinobacteria:o__Actinomycetales:f__Corynebacteriaceae:g__Corynebacterium        |
| MID3 | denovo359 | 5  | k_Bacteria:p__Bacteroidetes:c__Sphingobacteriia:o__Sphingobacteriales:f__g__                                      |
| MID3 | denovo360 | 3  | k_Bacteria:p__Bacteroidetes:c__Cytophagia:o__Cytophagales:f__Cytophagaceae:g__Emticicia                           |
| MID3 | denovo361 | 1  | k_Bacteria:p__Firmicutes:c__Bacilli:o__Lactobacillales:f__Lactobacillaceae:g__Lactobacillus                       |
| MID3 | denovo362 | 1  | k_Bacteria:p__Proteobacteria:c__Alphaproteobacteria:o__f__g__                                                     |
| MID3 | denovo367 | 1  | k_Bacteria:p__Firmicutes:c__Clostridia:o__Clostridiales:f__g__                                                    |
| MID3 | denovo37  | 1  | k_Bacteria:p__Cyanobacteria:c__Nostocophycideae:o__Nostocales:f__Nostocaceae:g__                                  |
| MID3 | denovo377 | 3  | k_Bacteria:p__Actinobacteria:c__Actinobacteria:o__Actinomycetales:f__Nocardiodiaceae:g__Propionicimonas           |
| MID3 | denovo378 | 2  | k_Bacteria:p__Proteobacteria:c__Gammaproteobacteria:o__Enterobacteriales:f__Enterobacteriaceae:g__Erwinia         |
| MID3 | denovo379 | 1  | k_Bacteria:p__Proteobacteria:c__Alphaproteobacteria:o__Rickettsiales:f__Rickettsiaceae:g__Wolbachia               |
| MID3 | denovo38  | 9  | k_Bacteria:p__Firmicutes:c__Clostridia:o__Clostridiales:f__Ruminococcaceae:g__                                    |
| MID3 | denovo380 | 1  | k_Bacteria:p__Actinobacteria:c__Thermoleophila:o__Gaiellales:f__Gaiellaceae:g__                                   |
| MID3 | denovo384 | 1  | k_Bacteria:p__Fusobacteria:c__Fusobacteriia:o__Fusobacteriales:f__Fusobacteriaceae:g__Fusobacterium               |

|      |           |    |                                                                                                                 |
|------|-----------|----|-----------------------------------------------------------------------------------------------------------------|
| MID3 | denovo387 | 1  | k_Bacteria:p__Proteobacteria:c__Gammaproteobacteria:o__Aeromonadales:f__Aeromonadaceae:g__                      |
| MID3 | denovo389 | 1  | k_Bacteria:p__Proteobacteria:c__Alphaproteobacteria:o__Rhizobiales:f__Methylocystaceae:g__                      |
| MID3 | denovo390 | 1  | k_Bacteria:p__Actinobacteria:c__Actinobacteria:o__Actinomycetales:f__Microbacteriaceae:g__Frigoribacterium      |
| MID3 | denovo393 | 5  | k_Bacteria:p__Proteobacteria:c__Gammaproteobacteria:o__Xanthomonadales:f__Xanthomonadaceae:g__Lysobacter        |
| MID3 | denovo398 | 1  | k_Bacteria:p__Bacteroidetes:c__Cytophagia:o__Cytophagales:f__Cytophagaceae:g__Rhodocytophaga                    |
| MID3 | denovo400 | 1  | k_Bacteria:p__Proteobacteria:c__Alphaproteobacteria:o__Rhizobiales:f__Methylobacteriaceae:g__Methylobacterium   |
| MID3 | denovo404 | 4  | k_Bacteria:p__Firmicutes:c__Bacilli:o__Lactobacillales:f__Enterococcaceae:g__Enterococcus                       |
| MID3 | denovo407 | 4  | k_Bacteria:p__Proteobacteria:c__Betaproteobacteria:o__f__g__                                                    |
| MID3 | denovo410 | 4  | k_Bacteria:p__Bacteroidetes:c__Sphingobacteria:o__Sphingobacteriales:f__g__                                     |
| MID3 | denovo414 | 1  | k_Bacteria:p__Proteobacteria:c__Alphaproteobacteria:o__Caulobacterales:f__Caulobacteraceae:g__                  |
| MID3 | denovo416 | 2  | k_Bacteria:p__Bacteroidetes:c__Bacteroidia:o__Bacteroidales:f__Porphyromonadaceae:g__Candidatus_Azobacteroides  |
| MID3 | denovo42  | 1  | k_Bacteria:p__Planctomycetes:c__Planctomycetia:o__Gemmatales:f__Isosphaeraceae:g__                              |
| MID3 | denovo420 | 1  | k_Bacteria:p__Proteobacteria:c__Deltaproteobacteria:o__Myxococcales:f__g__                                      |
| MID3 | denovo421 | 5  | k_Bacteria:p__Bacteroidetes:c__Cytophagia:o__Cytophagales:f__Cytophagaceae:g__                                  |
| MID3 | denovo431 | 9  | k_Bacteria:p__Proteobacteria:c__Alphaproteobacteria:o__Rhizobiales:f__Methylobacteriaceae:g__Methylobacterium   |
| MID3 | denovo433 | 1  | k_Bacteria:p__Proteobacteria:c__Alphaproteobacteria:o__Sphingomonadales:f__Sphingomonadaceae:g__                |
| MID3 | denovo434 | 1  | k_Bacteria:p__Actinobacteria:c__Actinobacteria:o__Actinomycetales:f__Microbacteriaceae:g__Microbacterium        |
| MID3 | denovo436 | 1  | k_Bacteria:p__Firmicutes:c__Bacilli:o__Lactobacillales:f__Streptococcaceae:g__Streptococcus                     |
| MID3 | denovo437 | 3  | k_Bacteria:p__Bacteroidetes:c__Bacteroidia:o__Bacteroidales:f__Prevotellaceae:g__Prevotella                     |
| MID3 | denovo438 | 1  | k_Bacteria:p__Firmicutes:c__Clostridia:o__Clostridiales:f__Veillonellaceae:g__Veillonella                       |
| MID3 | denovo443 | 1  | k_Bacteria:p__Proteobacteria:c__Alphaproteobacteria:o__Rhizobiales:f__Bradyrhizobiaceae:g__                     |
| MID3 | denovo445 | 2  | k_Bacteria:p__Proteobacteria:c__Alphaproteobacteria:o__Rhizobiales:f__Bradyrhizobiaceae:g__                     |
| MID3 | denovo446 | 3  | k_Bacteria:p__Proteobacteria:c__Alphaproteobacteria:o__Rhodospirillales:f__Rhodospirillaceae:g__                |
| MID3 | denovo449 | 1  | k_Bacteria:p__Proteobacteria:c__Alphaproteobacteria:o__Rhizobiales:f__Phyllobacteriaceae:g__Aminobacter         |
| MID3 | denovo45  | 1  | k_Bacteria:p__Actinobacteria:c__Actinobacteria:o__Actinomycetales:f__Kineosporiaceae:g__                        |
| MID3 | denovo450 | 5  | k_Bacteria:p__Planctomycetes:c__Planctomycetia:o__Planctomycetales:f__Planctomycetaceae:g__Planctomyces         |
| MID3 | denovo454 | 1  | k_Bacteria:p__Proteobacteria:c__Alphaproteobacteria:o__Sphingomonadales:f__Sphingomonadaceae:g__Kaistobacter    |
| MID3 | denovo457 | 1  | k_Bacteria:p__Actinobacteria:c__Thermoleophilia:o__Solirubrobacteriales:f__g__                                  |
| MID3 | denovo458 | 1  | k_Bacteria:p__Actinobacteria:c__Actinobacteria:o__Actinomycetales:f__g__                                        |
| MID3 | denovo463 | 2  | k_Bacteria:p__Proteobacteria:c__Alphaproteobacteria:o__Rhodospirillales:f__Acetobacteraceae:g__Roseococcus      |
| MID3 | denovo471 | 3  | k_Bacteria:p__Proteobacteria:c__Alphaproteobacteria:o__Rhizobiales:f__Hyphomicrobiaceae:g__Devosia              |
| MID3 | denovo475 | 1  | k_Bacteria:p__Firmicutes:c__Clostridia:o__f__g__                                                                |
| MID3 | denovo48  | 1  | k_Bacteria:p__Cyanobacteria:c__4Codd-2:o__SM1D11:f__g__                                                         |
| MID3 | denovo483 | 1  | k_Bacteria:p__Proteobacteria:c__Alphaproteobacteria:o__Rhodospirillales:f__g__                                  |
| MID3 | denovo485 | 1  | k_Bacteria:p__Firmicutes:c__Clostridia:o__Clostridiales:f__Lachnospiraceae:g__Blautia                           |
| MID3 | denovo488 | 7  | k_Bacteria:p__Proteobacteria:c__Gammaproteobacteria:o__Pseudomonadales:f__Moraxellaceae:g__Moraxella            |
| MID3 | denovo489 | 1  | k_Bacteria:p__Proteobacteria:c__Gammaproteobacteria:o__Pseudomonadales:f__Pseudomonadaceae:g__                  |
| MID3 | denovo490 | 1  | k_Bacteria:p__Proteobacteria:c__Alphaproteobacteria:o__Rhodospirillales:f__Rhodospirillaceae:g__                |
| MID3 | denovo492 | 40 | k_Bacteria:p__Cyanobacteria:c__Oscillatoriophyceae:o__Chroococcales:f__Xenococcaceae:g__Chroococcidiopsis       |
| MID3 | denovo493 | 1  | k_Bacteria:p__Firmicutes:c__Clostridia:o__Clostridiales:f__Clostridiaceae:g__Clostridium                        |
| MID3 | denovo494 | 1  | k_Bacteria:p__Firmicutes:c__Clostridia:o__Clostridiales:f__Lachnospiraceae:g__Coproccoccus                      |
| MID3 | denovo498 | 2  | k_Bacteria:p__Proteobacteria:c__Betaproteobacteria:o__Burkholderiales:f__g__                                    |
| MID3 | denovo501 | 1  | k_Bacteria:p__Actinobacteria:c__Actinobacteria:o__Actinomycetales:f__Nocardioideaceae:g__Propionimonas          |
| MID3 | denovo502 | 3  | k_Bacteria:p__Firmicutes:c__Bacilli:o__Lactobacillales:f__Leuconostocaceae:g__Leuconostoc                       |
| MID3 | denovo508 | 1  | k_Bacteria:p__Bacteroidetes:c__Cytophagia:o__Cytophagales:f__Cytophagaceae:g__Spirosoma                         |
| MID3 | denovo511 | 5  | k_Bacteria:p__Bacteroidetes:c__Flavobacteriia:o__Flavobacteriales:f__[Weeksellaceae]:g__Chryseobacterium        |
| MID3 | denovo515 | 3  | k_Bacteria:p__Actinobacteria:c__Thermoleophilia:o__Gaiellales:f__Gaiellaceae:g__                                |
| MID3 | denovo518 | 1  | k_Bacteria:p__Proteobacteria:c__Alphaproteobacteria:o__Rhizobiales:f__g__                                       |
| MID3 | denovo519 | 1  | k_Bacteria:p__Proteobacteria:c__Betaproteobacteria:o__Ellin6067:f__g__                                          |
| MID3 | denovo521 | 1  | k_Bacteria:p__Proteobacteria:c__Betaproteobacteria:o__f__g__                                                    |
| MID3 | denovo528 | 8  | k_Bacteria:p__Bacteroidetes:c__Cytophagia:o__Cytophagales:f__Cytophagaceae:g__                                  |
| MID3 | denovo530 | 15 | k_Bacteria:p__Firmicutes:c__Bacilli:o__Lactobacillales:f__Lactobacillaceae:g__Lactobacillus                     |
| MID3 | denovo532 | 2  | k_Bacteria:p__Firmicutes:c__Clostridia:o__Clostridiales:f__Veillonellaceae:g__Sporomusa                         |
| MID3 | denovo534 | 2  | k_Bacteria:p__Proteobacteria:c__Betaproteobacteria:o__Burkholderiales:f__Oxalobacteraceae:g__Janthinobacterium  |
| MID3 | denovo538 | 2  | k_Bacteria:p__Proteobacteria:c__Betaproteobacteria:o__SC-I-84:f__g__                                            |
| MID3 | denovo540 | 3  | k_Bacteria:p__Firmicutes:c__Bacilli:o__Bacillales:f__Bacillaceae:g__Bacillus                                    |
| MID3 | denovo541 | 1  | k_Bacteria:p__Bacteroidetes:c__Bacteroidia:o__Bacteroidales:f__Bacteroidaceae:g__Bacteroides                    |
| MID3 | denovo542 | 49 | k_Bacteria:p__Firmicutes:c__Clostridia:o__Clostridiales:f__[Tissierellaceae]:g__Finegoldia                      |
| MID3 | denovo544 | 1  | k_Bacteria:p__Firmicutes:c__Clostridia:o__Clostridiales:f__Ruminococcaceae:g__                                  |
| MID3 | denovo545 | 1  | k_Bacteria:p__Acidobacteria:c__Solibacteres:o__Solibacteriales:f__g__                                           |
| MID3 | denovo548 | 1  | k_Bacteria:p__Firmicutes:c__Clostridia:o__Clostridiales:f__Lachnospiraceae:g__                                  |
| MID3 | denovo555 | 1  | k_Bacteria:p__Cyanobacteria:c__Oscillatoriophyceae:o__Chroococcales:f__Xenococcaceae:g__                        |
| MID3 | denovo557 | 1  | k_Bacteria:p__Proteobacteria:c__Alphaproteobacteria:o__Rhizobiales:f__Hyphomicrobiaceae:g__                     |
| MID3 | denovo56  | 1  | k_Bacteria:p__Proteobacteria:c__Alphaproteobacteria:o__Rhodobacteriales:f__Rhodobacteraceae:g__Rubellimicrobium |
| MID3 | denovo564 | 2  | k_Bacteria:p__Firmicutes:c__Clostridia:o__Clostridiales:f__Christensenellaceae:g__                              |
| MID3 | denovo568 | 2  | k_Bacteria:p__Proteobacteria:c__Alphaproteobacteria:o__Sphingomonadales:f__Sphingomonadaceae:g__Sphingobium     |
| MID3 | denovo575 | 1  | k_Bacteria:p__Actinobacteria:c__Thermoleophilia:o__Gaiellales:f__g__                                            |

|      |           |    |                                                                                                            |
|------|-----------|----|------------------------------------------------------------------------------------------------------------|
| MID3 | denovo577 | 1  | k_Bacteria:p_Firmicutes:c_Clostridia:o_Clostridiales:f_Veillonellaceae:g_Veillonella                       |
| MID3 | denovo578 | 1  | k_Bacteria:p_Actinobacteria:c_Actinobacteria:o_Actinomycetales:f_Microbacteriaceae:g_Mycetocola            |
| MID3 | denovo584 | 1  | k_Bacteria:p_Actinobacteria:c_Acidimicrobia:o_Acidimicrobiales:f_Microthrixaceae:g_                        |
| MID3 | denovo588 | 1  | k_Bacteria:p_Firmicutes:c_Clostridia:o_OPB54:f_g_                                                          |
| MID3 | denovo591 | 1  | k_Bacteria:p_Actinobacteria:c_MB-A2-108:o_0319-7L14:f_g_                                                   |
| MID3 | denovo592 | 3  | k_Bacteria:p_Firmicutes:c_Clostridia:o_Clostridiales:f_Clostridiaceae:g_                                   |
| MID3 | denovo593 | 1  | k_Bacteria:p_Actinobacteria:c_Actinobacteria:o_Actinomycetales:f_g_                                        |
| MID3 | denovo594 | 1  | k_Bacteria:p_Nitrospirae:c_Nitrospira:o_Nitrospirales:f_Nitrospiraceae:g_Nitrospira                        |
| MID3 | denovo595 | 1  | k_Bacteria:p_Proteobacteria:c_Alphaproteobacteria:o_Rhodobacterales:f_Rhodobacteraceae:g_Amaricoccus       |
| MID3 | denovo599 | 1  | k_Bacteria:p_Firmicutes:c_Clostridia:o_Clostridiales:f_Lachnospiraceae:g_Dorea                             |
| MID3 | denovo60  | 5  | k_Bacteria:p_Proteobacteria:c_Alphaproteobacteria:o_Sphingomonadales:f_Sphingomonadaceae:g_                |
| MID3 | denovo600 | 4  | k_Bacteria:p_Cyanobacteria:c_Oscillatorioophycideae:o_Oscillatoriales:f_Phormidiaceae:g_Phormidium         |
| MID3 | denovo601 | 1  | k_Bacteria:p_Actinobacteria:c_Actinobacteria:o_Actinomycetales:f_Geodermatophilaceae:g_Modestobacter       |
| MID3 | denovo602 | 2  | k_Bacteria:p_Firmicutes:c_Clostridia:o_Clostridiales:f_Lachnospiraceae:g_Catonella                         |
| MID3 | denovo605 | 6  | k_Bacteria:p_Firmicutes:c_Bacilli:o_Gemellales:f_Gemellaceae:g_Gemella                                     |
| MID3 | denovo606 | 1  | k_Bacteria:p_Planctomycetes:c_Planctomycetia:o_Gemmatales:f_Gemmataceae:g_                                 |
| MID3 | denovo612 | 1  | k_Bacteria:p_Proteobacteria:c_Alphaproteobacteria:o_Rhizobiales                                            |
| MID3 | denovo616 | 1  | k_Bacteria:p_Proteobacteria:c_Alphaproteobacteria:o_Rhizobiales:f_Phyllobacteriaceae                       |
| MID3 | denovo618 | 1  | k_Bacteria:p_Proteobacteria:c_Alphaproteobacteria:o_Rhizobiales:f_Hyphomicrobiaceae:g_Rhodoplanes          |
| MID3 | denovo622 | 2  | k_Bacteria:p_Firmicutes:c_Clostridia:o_Clostridiales:f_Lachnospiraceae:g_Coproccus                         |
| MID3 | denovo624 | 2  | k_Bacteria:p_Proteobacteria:c_Gammaproteobacteria:o_Xanthomonadales:f_Xanthomonadaceae:g_                  |
| MID3 | denovo628 | 7  | k_Bacteria:p_Proteobacteria:c_Gammaproteobacteria:o_Xanthomonadales:f_Xanthomonadaceae:g_Arenimonas        |
| MID3 | denovo63  | 8  | k_Bacteria:p_Firmicutes:c_Bacilli:o_Lactobacillales:f_Lactobacillaceae:g_Lactobacillus                     |
| MID3 | denovo630 | 1  | k_Bacteria:p_Bacteroidetes:c_Flavobacteriia:o_Flavobacteriales:f_[Weeksellaceae]:g_Chryseobacterium        |
| MID3 | denovo634 | 1  | k_Bacteria:p_Cyanobacteria:c_Chloroplast:o_Chlorophyta:f_Chlamydomonadaceae:g_                             |
| MID3 | denovo636 | 2  | k_Bacteria:p_Actinobacteria:c_Thermoleophila:o_Solirubrobacterales:f_Patulibacteraceae:g_                  |
| MID3 | denovo638 | 2  | k_Bacteria:p_Cyanobacteria:c_Chloroplast:o_Stramenopiles:f_g_                                              |
| MID3 | denovo639 | 1  | k_Bacteria:p_Actinobacteria:c_Actinobacteria:o_Actinomycetales:f_Geodermatophilaceae:g_Modestobacter       |
| MID3 | denovo641 | 2  | k_Bacteria:p_Acidobacteria:c_Solibacteres:o_Solibacterales:f_g_                                            |
| MID3 | denovo644 | 1  | k_Bacteria:p_Proteobacteria:c_Alphaproteobacteria:o_Rhizobiales:f_Methylocystaceae:g_                      |
| MID3 | denovo645 | 1  | k_Bacteria:p_Proteobacteria:c_Alphaproteobacteria:o_Rhodospirillales:f_Acetobacteraceae:g_                 |
| MID3 | denovo646 | 1  | k_Bacteria:p_Proteobacteria:c_Deltaproteobacteria:o_Myxococcales:f_g_                                      |
| MID3 | denovo648 | 1  | k_Bacteria:p_Proteobacteria:c_Alphaproteobacteria:o_Rhizobiales:f_Aurantimonadaceae:g_                     |
| MID3 | denovo65  | 5  | k_Bacteria:p_Firmicutes:c_Bacilli:o_Bacillales:f_[Exiguobacteraceae]:g_Exiguobacterium                     |
| MID3 | denovo650 | 1  | k_Bacteria:p_Proteobacteria:c_Gammaproteobacteria:o_Legionellales:f_Legionellaceae:g_Legionella            |
| MID3 | denovo651 | 1  | k_Bacteria:p_Firmicutes:c_Bacilli:o_Lactobacillales:f_Aerococcaceae:g_Alloiococcus                         |
| MID3 | denovo652 | 1  | k_Bacteria:p_Proteobacteria:c_Gammaproteobacteria:o_Xanthomonadales:f_Sinobacteraceae:g_                   |
| MID3 | denovo655 | 11 | k_Bacteria:p_Firmicutes:c_Clostridia:o_Clostridiales:f_[Tissierellaceae]:g_Anaerococcus                    |
| MID3 | denovo657 | 8  | k_Bacteria:p_Proteobacteria:c_Alphaproteobacteria:o_Rhodospirillales:f_Acetobacteraceae:g_                 |
| MID3 | denovo66  | 6  | k_Bacteria:p_Proteobacteria:c_Alphaproteobacteria:o_Rhodospirillales:f_Rhodospirillaceae:g_                |
| MID3 | denovo660 | 2  | k_Bacteria:p_Firmicutes:c_Erysipelotrichi:o_Erysipelotrichales:f_Erysipelotrichaceae:g_[Eubacterium]       |
| MID3 | denovo661 | 4  | k_Bacteria:p_Actinobacteria:c_Actinobacteria:o_Actinomycetales:f_g_                                        |
| MID3 | denovo662 | 1  | k_Bacteria:p_Bacteroidetes:c_Bacteroidia:o_Bacteroidales:f_Prevotellaceae:g_Prevotella                     |
| MID3 | denovo663 | 4  | k_Bacteria:p_Proteobacteria:c_Alphaproteobacteria:o_Rhizobiales:f_Methylobacteriaceae:g_Methylobacterium   |
| MID3 | denovo665 | 3  | k_Bacteria:p_Firmicutes:c_Bacilli:o_Lactobacillales:f_Lactobacillaceae:g_Lactobacillus                     |
| MID3 | denovo666 | 2  | k_Bacteria:p_Firmicutes:c_Bacilli:o_Lactobacillales:f_Aerococcaceae:g_Aerococcus                           |
| MID3 | denovo667 | 2  | k_Bacteria:p_Actinobacteria:c_Thermoleophila:o_Solirubrobacterales:f_g_                                    |
| MID3 | denovo679 | 1  | k_Bacteria:p_Firmicutes:c_Bacilli:o_Bacillales:f_Bacillaceae:g_Bacillus                                    |
| MID3 | denovo687 | 2  | k_Bacteria:p_Firmicutes:c_Clostridia:o_Clostridiales                                                       |
| MID3 | denovo689 | 4  | k_Bacteria:p_Firmicutes:c_Clostridia:o_Clostridiales:f_Clostridiaceae:g_Clostridium                        |
| MID3 | denovo691 | 2  | k_Bacteria:p_Gemmatimonadetes:c_Gemmatimonadetes:o_Gemmatimonadales:f_Gemmatimonadaceae:g_Gemmatimonas     |
| MID3 | denovo692 | 1  | k_Bacteria:p_Proteobacteria:c_Alphaproteobacteria:o_Rickettsiales:f_g_                                     |
| MID3 | denovo693 | 2  | k_Bacteria:p_Proteobacteria:c_Alphaproteobacteria:o_Caulobacterales:f_Caulobacteraceae:g_                  |
| MID3 | denovo694 | 1  | k_Bacteria:p_Actinobacteria:c_Actinobacteria:o_Actinomycetales:f_Mycobacteriaceae:g_Mycobacterium          |
| MID3 | denovo695 | 2  | k_Bacteria:p_Bacteroidetes:c_[Saprospirae]:o_[Saprospirales]:f_Chitinophagaceae:g_                         |
| MID3 | denovo696 | 3  | k_Bacteria:p_Actinobacteria:c_Actinobacteria:o_Actinomycetales:f_Propionibacteriaceae:g_Propionibacterium  |
| MID3 | denovo699 | 2  | k_Bacteria:p_Proteobacteria:c_Alphaproteobacteria:o_Rhodospirillales:f_Acetobacteraceae:g_                 |
| MID3 | denovo70  | 9  | k_Bacteria:p_Cyanobacteria:c_Nostocophycideae:o_Nostocales:f_Nostocaceae:g_Cylindrospermopsis              |
| MID3 | denovo700 | 1  | k_Bacteria:p_Proteobacteria:c_Gammaproteobacteria:o_Xanthomonadales:f_Xanthomonadaceae:g_Pseudoxanthomonas |
| MID3 | denovo703 | 4  | k_Bacteria:p_Firmicutes:c_Bacilli:o_Bacillales:f_Staphylococcaceae:g_Macrococcus                           |
| MID3 | denovo709 | 11 | k_Bacteria:p_Proteobacteria:c_Gammaproteobacteria:o_Pseudomonadales:f_Moraxellaceae:g_Enhydrobacter        |
| MID3 | denovo71  | 7  | k_Bacteria:p_Proteobacteria:c_Alphaproteobacteria:o_Rhizobiales:f_Hyphomicrobiaceae:g_Devosia              |
| MID3 | denovo722 | 1  | k_Bacteria:p_Firmicutes:c_Clostridia:o_Clostridiales:f_Clostridiaceae                                      |
| MID3 | denovo725 | 1  | k_Bacteria:p_Proteobacteria:c_Gammaproteobacteria:o_Enterobacterales:f_Enterobacteriaceae:g_Erwinia        |
| MID3 | denovo729 | 7  | k_Bacteria:p_Proteobacteria:c_Alphaproteobacteria:o_Rhizobiales:f_Phyllobacteriaceae                       |
| MID3 | denovo731 | 1  | k_Bacteria:p_Firmicutes:c_Clostridia:o_Clostridiales:f_[Tissierellaceae]:g_Finegoldia                      |
| MID3 | denovo734 | 1  | k_Bacteria:p_Proteobacteria:c_Betaproteobacteria:o_Neisseriales:f_Neisseriaceae:g_Neisseria                |

|      |           |    |                                                                                                                 |
|------|-----------|----|-----------------------------------------------------------------------------------------------------------------|
| MID3 | denovo74  | 1  | k__Bacteria:p__Actinobacteria:c__Actinobacteria:o__Actinomycetales:f__Corynebacteriaceae:g__Corynebacterium     |
| MID3 | denovo742 | 1  | k__Bacteria:p__Actinobacteria:c__Actinobacteria:o__Actinomycetales:f__Frankiaceae:g__                           |
| MID3 | denovo748 | 1  | k__Bacteria:p__Proteobacteria:c__Gammaproteobacteria:o__Xanthomonadales:f__Xanthomonadaceae:g__Lysobacter       |
| MID3 | denovo75  | 1  | k__Bacteria:p__Proteobacteria:c__Betaproteobacteria:o__Burkholderiales:f__Comamonadaceae:g__Comamonas           |
| MID3 | denovo754 | 1  | k__Bacteria:p__Proteobacteria:c__Alphaproteobacteria:o__Sphingomonadales:f__Erythrobacteraceae:g__              |
| MID3 | denovo755 | 2  | k__Bacteria:p__Proteobacteria:c__Gammaproteobacteria:o__Xanthomonadales:f__Xanthomonadaceae:g__Dokdonella       |
| MID3 | denovo756 | 2  | k__Bacteria:p__Actinobacteria:c__Thermoleophila:o__Solirubrobacterales:f__Solirubrobacteraceae:g__              |
| MID3 | denovo758 | 2  | k__Bacteria:p__Actinobacteria:c__Actinobacteria:o__Actinomycetales:f__g__                                       |
| MID3 | denovo759 | 1  | k__Bacteria:p__Proteobacteria:c__Alphaproteobacteria:o__Sphingomonadales:f__Sphingomonadaceae:g__Sphingomonas   |
| MID3 | denovo760 | 1  | k__Bacteria:p__Firmicutes:c__Bacilli:o__Bacillales:f__Paenibacillaceae:g__Paenibacillus                         |
| MID3 | denovo761 | 1  | k__Bacteria:p__Proteobacteria:c__Alphaproteobacteria:o__Rhodobacterales:f__Rhodobacteraceae:g__Paracoccus       |
| MID3 | denovo766 | 2  | k__Bacteria:p__Actinobacteria:c__Actinobacteria:o__Actinomycetales:f__Microbacteriaceae:g__Agrococcus           |
| MID3 | denovo767 | 2  | k__Bacteria:p__Proteobacteria:c__Betaproteobacteria:o__Methylophilales:f__Methylophilaceae:g__Methylotenera     |
| MID3 | denovo77  | 1  | k__Bacteria:p__Firmicutes:c__Clostridia:o__Clostridiales:f__Ruminococcaceae:g__                                 |
| MID3 | denovo770 | 52 | k__Bacteria:p__Cyanobacteria:c__Oscillatoriophyceae:o__Chroococcales:f__Xenococcaceae:g__                       |
| MID3 | denovo771 | 3  | k__Bacteria:p__Armatimonadetes:c__Armatimonadia:o__Armatimonadales:f__Armatimonadaceae:g__                      |
| MID3 | denovo773 | 1  | k__Bacteria:p__Acidobacteria:c__Solibacteres:o__Solibacterales:f__g__                                           |
| MID3 | denovo774 | 1  | k__Bacteria:p__Proteobacteria:c__Gammaproteobacteria:o__Xanthomonadales:f__Sinobacteraceae:g__                  |
| MID3 | denovo783 | 3  | k__Bacteria:p__Cyanobacteria:c__Oscillatoriophyceae:o__Oscillatoriales:f__Phormidiaceae:g__Phormidium           |
| MID3 | denovo784 | 3  | k__Bacteria:p__Proteobacteria:c__Gammaproteobacteria:o__Xanthomonadales:f__Xanthomonadaceae:g__                 |
| MID3 | denovo786 | 7  | k__Bacteria:p__Firmicutes:c__Clostridia:o__Clostridiales                                                        |
| MID3 | denovo787 | 2  | k__Bacteria:p__Firmicutes:c__Clostridia:o__Clostridiales:f__[Mogibacteriaceae]:g__Mogibacterium                 |
| MID3 | denovo789 | 2  | k__Bacteria:p__Proteobacteria:c__Betaproteobacteria:o__Burkholderiales:f__Oxalobacteraceae:g__Janthinobacterium |
| MID3 | denovo79  | 25 | k__Bacteria:p__Firmicutes:c__Clostridia:o__Clostridiales:f__[Tissierellaceae]:g__Anaerococcus                   |
| MID3 | denovo790 | 2  | k__Bacteria:p__Cyanobacteria:c__Chloroplast:o__Streptophyta:f__g__                                              |
| MID3 | denovo795 | 1  | k__Bacteria:p__Actinobacteria:c__Actinobacteria:o__Actinomycetales:f__g__                                       |
| MID3 | denovo796 | 4  | k__Bacteria:p__Proteobacteria:c__Alphaproteobacteria:o__Rhodobacterales:f__Rhodobacteraceae:g__Rubellimicrobium |
| MID3 | denovo797 | 1  | k__Bacteria:p__Proteobacteria:c__Alphaproteobacteria:o__Rhizobiales:f__Phyllobacteriaceae:g__                   |
| MID3 | denovo799 | 1  | k__Bacteria:p__Firmicutes:c__Clostridia:o__Clostridiales:f__Lachnospiraceae:g__Coproccoccus                     |
| MID3 | denovo803 | 2  | k__Bacteria:p__Actinobacteria:c__Actinobacteria:o__Actinomycetales:f__Sporichthyaceae:g__                       |
| MID3 | denovo806 | 12 | k__Bacteria:p__Firmicutes:c__Bacilli:o__Bacillales:f__Bacillaceae:g__Bacillus                                   |
| MID3 | denovo807 | 8  | k__Bacteria:p__Firmicutes:c__Clostridia:o__Clostridiales:f__Lachnospiraceae:g__                                 |
| MID3 | denovo81  | 3  | k__Bacteria:p__Acidobacteria:c__Acidobacteria-6:o__iii1-15:f__g__                                               |
| MID3 | denovo811 | 2  | k__Bacteria:p__Proteobacteria:c__Betaproteobacteria:o__Burkholderiales:f__Comamonadaceae                        |
| MID3 | denovo818 | 3  | k__Bacteria:p__Proteobacteria:c__Alphaproteobacteria:o__Rhodobacterales:f__Rhodobacteraceae:g__Rubellimicrobium |
| MID3 | denovo819 | 1  | k__Bacteria:p__Proteobacteria:c__Alphaproteobacteria:o__Rhizobiales:f__Hyphomicrobiaceae:g__Rhodoplanes         |
| MID3 | denovo821 | 1  | k__Bacteria:p__Proteobacteria:c__Alphaproteobacteria:o__Rhizobiales:f__Methylocystaceae:g__                     |
| MID3 | denovo824 | 14 | k__Bacteria:p__Firmicutes:c__Bacilli:o__Bacillales:f__Paenibacillaceae:g__Paenibacillus                         |
| MID3 | denovo829 | 7  | k__Bacteria:p__Firmicutes:c__Bacilli:o__Lactobacillales:f__Carnobacteriaceae:g__Carnobacterium                  |
| MID3 | denovo83  | 3  | k__Bacteria:p__Actinobacteria:c__Actinobacteria:o__Actinomycetales:f__Corynebacteriaceae:g__Corynebacterium     |
| MID3 | denovo831 | 1  | k__Bacteria:p__Actinobacteria:c__Actinobacteria:o__Actinomycetales:f__Propionibacteriaceae:g__                  |
| MID3 | denovo832 | 2  | k__Bacteria:p__Firmicutes:c__Clostridia:o__Clostridiales:f__Clostridiaceae:g__Clostridium                       |
| MID3 | denovo834 | 4  | k__Bacteria:p__Proteobacteria:c__Alphaproteobacteria:o__Sphingomonadales:f__Sphingomonadaceae:g__Sphingomonas   |
| MID3 | denovo836 | 8  | k__Bacteria:p__Cyanobacteria:c__Oscillatoriophyceae:o__Chroococcales:f__Xenococcaceae                           |
| MID3 | denovo844 | 4  | k__Bacteria:p__Proteobacteria:c__Betaproteobacteria:o__Burkholderiales:f__Comamonadaceae:g__                    |
| MID3 | denovo852 | 2  | k__Bacteria:p__Firmicutes:c__Clostridia:o__Clostridiales:f__Lachnospiraceae:g__                                 |
| MID3 | denovo853 | 13 | k__Bacteria:p__Proteobacteria:c__Betaproteobacteria:o__Burkholderiales:f__g__                                   |
| MID3 | denovo861 | 1  | k__Bacteria:p__Actinobacteria:c__Thermoleophila:o__Solirubrobacterales:f__g__                                   |
| MID3 | denovo865 | 2  | k__Bacteria:p__Planctomycetes:c__Planctomycetia:o__Gemmatales:f__Isosphaeraceae:g__                             |
| MID3 | denovo866 | 3  | k__Bacteria:p__Proteobacteria:c__Deltaproteobacteria:o__Spirobacillales:f__g__                                  |
| MID3 | denovo868 | 8  | k__Bacteria:p__Firmicutes:c__Clostridia:o__Clostridiales:f__[Tissierellaceae]:g__Anaerococcus                   |
| MID3 | denovo869 | 1  | k__Bacteria:p__Proteobacteria:c__Alphaproteobacteria:o__Rhizobiales:f__Hyphomicrobiaceae:g__Pedomicrobium       |
| MID3 | denovo871 | 1  | k__Bacteria:p__Firmicutes:c__Bacilli:o__Lactobacillales:f__Streptococcaceae:g__Lactococcus                      |
| MID3 | denovo875 | 2  | k__Bacteria:p__Firmicutes:c__Clostridia:o__Clostridiales:f__Clostridiaceae:g__                                  |
| MID3 | denovo876 | 2  | k__Bacteria:p__Actinobacteria:c__Actinobacteria:o__Actinomycetales:f__Mycobacteriaceae:g__Mycobacterium         |
| MID3 | denovo878 | 18 | k__Bacteria:p__Firmicutes:c__Bacilli:o__Lactobacillales:f__Streptococcaceae:g__Streptococcus                    |
| MID3 | denovo879 | 1  | k__Bacteria:p__Planctomycetes:c__Planctomycetia:o__Pirellulales:f__Pirellulaceae:g__                            |
| MID3 | denovo880 | 3  | k__Bacteria:p__Firmicutes:c__Clostridia:o__Clostridiales:f__Ruminococcaceae:g__Ruminococcus                     |
| MID3 | denovo883 | 4  | k__Bacteria:p__Proteobacteria:c__Alphaproteobacteria:o__Rhizobiales:f__Hyphomicrobiaceae:g__Rhodoplanes         |
| MID3 | denovo885 | 11 | k__Bacteria:p__Firmicutes:c__Clostridia:o__Clostridiales:f__Ruminococcaceae:g__                                 |
| MID3 | denovo886 | 7  | k__Bacteria:p__Firmicutes:c__Clostridia:o__Clostridiales:f__[Tissierellaceae]:g__Peptoniphilus                  |
| MID3 | denovo887 | 2  | k__Bacteria:p__Proteobacteria:c__Alphaproteobacteria:o__Rhizobiales:f__Beijerinckiaceae:g__                     |
| MID3 | denovo891 | 1  | k__Bacteria:p__Acidobacteria:c__Acidobacteria-6:o__iii1-15:f__g__                                               |
| MID3 | denovo892 | 1  | k__Bacteria:p__Firmicutes:c__Clostridia:o__Clostridiales:f__[Tissierellaceae]:g__Peptoniphilus                  |
| MID3 | denovo896 | 1  | k__Bacteria:p__Bacteroidetes:c__Bacteroidia:o__Bacteroidales:f__Prevotellaceae:g__Prevotella                    |
| MID3 | denovo897 | 6  | k__Bacteria:p__Actinobacteria:c__Actinobacteria:o__Actinomycetales:f__Corynebacteriaceae:g__Corynebacterium     |
| MID3 | denovo902 | 2  | k__Bacteria:p__Cyanobacteria:c__Oscillatoriophyceae:o__Chroococcales:f__Xenococcaceae:g__                       |

|      |            |    |                                                                                                                 |
|------|------------|----|-----------------------------------------------------------------------------------------------------------------|
| MID3 | denovo904  | 1  | k__Bacteria:p__Firmicutes:c__Bacilli:o__Bacillales:f__Bacillaceae:g__Bacillus                                   |
| MID3 | denovo905  | 1  | k__Bacteria:p__Acidobacteria:c__Acidobacteria:6:o__iii1-15:f__mb2424:g__                                        |
| MID3 | denovo907  | 2  | k__Bacteria:p__Proteobacteria:c__Gammaproteobacteria:o__Xanthomonadales:f__Sinobacteraceae:g__                  |
| MID3 | denovo908  | 1  | k__Bacteria:p__Firmicutes:c__Clostridia:o__Clostridiales:f__Ruminococcaceae:g__                                 |
| MID3 | denovo909  | 2  | k__Bacteria:p__Actinobacteria:c__Actinobacteria:o__Actinomycetales:f__Propionibacteriaceae:g__                  |
| MID3 | denovo911  | 1  | k__Bacteria:p__Acidobacteria:c__[Chloracidobacteria]:o__RB41:f__Ellin6075:g__                                   |
| MID3 | denovo918  | 2  | k__Bacteria:p__Actinobacteria:c__Actinobacteria:o__Actinomycetales:f__Microbacteriaceae:g__Rathayibacter        |
| MID3 | denovo919  | 3  | k__Bacteria:p__Bacteroidetes:c__Cytophagia:o__Cytophagales:f__Cytophagaceae:g__Hymenobacter                     |
| MID3 | denovo921  | 2  | k__Bacteria:p__Chloroflexi:c__TK10:o__f__g__                                                                    |
| MID3 | denovo922  | 1  | k__Bacteria:p__Proteobacteria:c__Alphaproteobacteria:o__Rhizobiales:f__Bradyrhizobiaceae                        |
| MID3 | denovo923  | 1  | k__Bacteria:p__Firmicutes:c__Clostridia:o__Clostridiales:f__Ruminococcaceae:g__                                 |
| MID3 | denovo927  | 2  | k__Bacteria:p__Planctomycetes:c__Planctomycetia:o__Gemmatales:f__Isosphaeraceae:g__                             |
| MID3 | denovo928  | 9  | k__Bacteria:p__Proteobacteria:c__Alphaproteobacteria:o__Rhodospirillales:f__Acetobacteraceae:g__                |
| MID3 | denovo929  | 1  | k__Bacteria:p__Actinobacteria:c__Actinobacteria:o__Actinomycetales:f__Corynebacteriaceae:g__Corynebacterium     |
| MID3 | denovo93   | 11 | k__Bacteria:p__Bacteroidetes:c__Bacteroidia:o__Bacteroidales:f__Prevotellaceae:g__Prevotella                    |
| MID3 | denovo930  | 1  | k__Bacteria:p__Proteobacteria:c__Alphaproteobacteria:o__Rhodospirillales:f__Acetobacteraceae:g__                |
| MID3 | denovo935  | 2  | k__Bacteria:p__Proteobacteria:c__Gammaproteobacteria:o__Xanthomonadales:f__Xanthomonadaceae:g__Thermomonas      |
| MID3 | denovo938  | 3  | k__Bacteria:p__Actinobacteria:c__Actinobacteria:o__Actinomycetales:f__Brevibacteriaceae:g__Brevibacterium       |
| MID3 | denovo946  | 5  | k__Bacteria:p__Proteobacteria:c__Gammaproteobacteria:o__Xanthomonadales:f__Xanthomonadaceae:g__Lysobacter       |
| MID3 | denovo947  | 1  | k__Bacteria:p__Firmicutes:c__Clostridia:o__Clostridiales:f__Ruminococcaceae:g__                                 |
| MID3 | denovo949  | 5  | k__Bacteria:p__Proteobacteria:c__Alphaproteobacteria:o__Caulobacterales:f__Caulobacteraceae:g__                 |
| MID3 | denovo95   | 1  | k__Bacteria:p__Bacteroidetes:c__Flavobacteriia:o__Flavobacteriales:f__[Weeksellaceae]:g__Chryseobacterium       |
| MID3 | denovo952  | 1  | k__Bacteria:p__Chloroflexi:c__Ellin6529:o__f__g__                                                               |
| MID3 | denovo953  | 2  | k__Bacteria:p__Actinobacteria:c__Actinobacteria:o__Actinomycetales:f__Microbacteriaceae:g__Curtobacterium       |
| MID3 | denovo955  | 3  | k__Bacteria:p__Proteobacteria:c__Alphaproteobacteria:o__Rhizobiales:f__Methylobacteriaceae:g__Methylobacterium  |
| MID3 | denovo956  | 2  | k__Bacteria:p__Cyanobacteria:c__Chloroplast:o__Chlorophyta:f__g__                                               |
| MID3 | denovo957  | 6  | k__Bacteria:p__Actinobacteria:c__MB-A2-108:o__0319-7L14:f__g__                                                  |
| MID3 | denovo96   | 11 | k__Bacteria:p__Firmicutes:c__Clostridia:o__Clostridiales:f__[Tissierellaceae]:g__Anaerococcus                   |
| MID3 | denovo960  | 1  | k__Bacteria:p__Proteobacteria:c__Alphaproteobacteria:o__Rhodospirillales:f__Rhodospirillaceae:g__               |
| MID3 | denovo963  | 1  | k__Bacteria:p__Proteobacteria:c__Alphaproteobacteria:o__Sphingomonadales:f__Sphingomonadaceae:g__               |
| MID3 | denovo964  | 1  | k__Bacteria:p__Proteobacteria:c__Gammaproteobacteria:o__Pseudomonadales:f__Moraxellaceae:g__Acinetobacter       |
| MID3 | denovo973  | 7  | k__Bacteria:p__Firmicutes:c__Bacilli:o__Bacillales:f__Staphylococcaceae:g__Jeotgalicoccus                       |
| MID3 | denovo974  | 1  | k__Bacteria:p__Bacteroidetes:c__Bacteroidia:o__Bacteroidales:f__Porphyromonadaceae:g__                          |
| MID3 | denovo977  | 2  | k__Bacteria:p__Cyanobacteria:c__Nostocophycideae:o__Stigonematales:f__Rivulariaceae:g__Calothrix                |
| MID3 | denovo978  | 1  | k__Bacteria:p__Proteobacteria:c__Alphaproteobacteria:o__BD7-3:f__g__                                            |
| MID3 | denovo979  | 4  | k__Bacteria:p__Proteobacteria:c__Alphaproteobacteria:o__Sphingomonadales:f__Sphingomonadaceae:g__Sphingomonas   |
| MID3 | denovo98   | 3  | k__Bacteria:p__Bacteroidetes:c__Cytophagia:o__Cytophagales:f__Cytophagaceae:g__                                 |
| MID3 | denovo980  | 1  | k__Bacteria:p__Actinobacteria:c__Thermoleophilla:o__Solirubrobacterales:f__Solirubrobacteraceae:g__             |
| MID3 | denovo981  | 7  | k__Bacteria:p__Firmicutes:c__Bacilli:o__Lactobacillales:f__Leuconostocaceae:g__                                 |
| MID3 | denovo99   | 1  | k__Bacteria:p__WPS-2:c__o__f__g__                                                                               |
| MID3 | denovo992  | 2  | k__Bacteria:p__Proteobacteria:c__Betaproteobacteria:o__Neisseriales:f__Neisseriaceae:g__                        |
| MID3 | denovo999  | 2  | k__Bacteria:p__Proteobacteria:c__Alphaproteobacteria:o__Rhizobiales:f__g__                                      |
| MID4 | denovo1000 | 1  | k__Bacteria:p__Bacteroidetes:c__Flavobacteriia:o__Flavobacteriales:f__Flavobacteriaceae:g__Flavobacterium       |
| MID4 | denovo1001 | 1  | k__Bacteria:p__Proteobacteria:c__Alphaproteobacteria:o__Rhodobacterales:f__Rhodobacteraceae:g__Rubellimicrobium |
| MID4 | denovo1005 | 1  | k__Bacteria:p__Proteobacteria:c__Alphaproteobacteria:o__Rhodobacterales:f__Rhodobacteraceae:g__Rubellimicrobium |
| MID4 | denovo1013 | 5  | k__Bacteria:p__Cyanobacteria:c__Nostocophycideae:o__Nostocales:f__Nostocaceae                                   |
| MID4 | denovo1014 | 3  | k__Bacteria:p__Proteobacteria:c__Alphaproteobacteria:o__Rhizobiales:f__Bradyrhizobiaceae:g__Balneimonas         |
| MID4 | denovo1015 | 6  | k__Bacteria:p__Firmicutes:c__Clostridia:o__Clostridiales:f__[Tissierellaceae]:g__1-68                           |
| MID4 | denovo1018 | 12 | k__Bacteria:p__Firmicutes:c__Clostridia:o__Clostridiales:f__[Tissierellaceae]:g__Peptoniphilus                  |
| MID4 | denovo1019 | 1  | k__Bacteria:p__Firmicutes:c__Bacilli:o__Bacillales:f__Bacillaceae:g__Bacillus                                   |
| MID4 | denovo1020 | 1  | k__Bacteria:p__Cyanobacteria:c__Chloroplast:o__Streptophyta:f__g__                                              |
| MID4 | denovo1029 | 1  | k__Bacteria:p__Nitrospirae:c__Nitrospira:o__Nitrospirales:f__g__                                                |
| MID4 | denovo103  | 1  | k__Bacteria:p__Bacteroidetes:c__Bacteroidia:o__Bacteroidales:f__Prevotellaceae:g__Prevotella                    |
| MID4 | denovo1031 | 1  | k__Bacteria:p__Actinobacteria:c__Actinobacteria:o__Actinomycetales                                              |
| MID4 | denovo1034 | 1  | k__Bacteria:p__Firmicutes:c__Clostridia:o__Clostridiales:f__Lachnospiraceae:g__Anaerostipes                     |
| MID4 | denovo1035 | 3  | k__Bacteria:p__Actinobacteria:c__Actinobacteria:o__Actinomycetales:f__Micrococcaceae:g__                        |
| MID4 | denovo1037 | 5  | k__Bacteria:p__Actinobacteria:c__Actinobacteria:o__Actinomycetales:f__Corynebacteriaceae:g__Corynebacterium     |
| MID4 | denovo1040 | 3  | k__Bacteria:p__Proteobacteria:c__Alphaproteobacteria:o__Rickettsiales:f__Rickettsiaceae:g__Rickettsia           |
| MID4 | denovo1044 | 1  | k__Bacteria:p__Firmicutes:c__Clostridia:o__Clostridiales:f__Lachnospiraceae:g__Coprococcus                      |
| MID4 | denovo1045 | 5  | k__Bacteria:p__Actinobacteria:c__Actinobacteria:o__Actinomycetales:f__Micrococcaceae:g__Kocuria                 |
| MID4 | denovo1047 | 1  | k__Bacteria:p__Bacteroidetes:c__Flavobacteriia:o__Flavobacteriales:f__Flavobacteriaceae:g__Flavobacterium       |
| MID4 | denovo1049 | 1  | k__Bacteria:p__Proteobacteria:c__Gammaproteobacteria:o__Legionellales:f__g__                                    |
| MID4 | denovo105  | 4  | k__Bacteria:p__Actinobacteria:c__Actinobacteria:o__Actinomycetales:f__Brevibacteriaceae:g__Brevibacterium       |
| MID4 | denovo1052 | 1  | k__Bacteria:p__Firmicutes:c__Clostridia:o__Clostridiales:f__Veillonellaceae:g__Phascolarctobacterium            |
| MID4 | denovo1053 | 1  | k__Bacteria:p__Proteobacteria:c__Alphaproteobacteria:o__Rhizobiales:f__Beijerinckiaceae:g__                     |
| MID4 | denovo1059 | 3  | k__Bacteria:p__Actinobacteria:c__Actinobacteria:o__Actinomycetales:f__Microbacteriaceae:g__Microbacterium       |
| MID4 | denovo106  | 3  | k__Bacteria:p__Firmicutes:c__Clostridia:o__Clostridiales:f__Lachnospiraceae                                     |

|      |            |    |                                                                                                                |
|------|------------|----|----------------------------------------------------------------------------------------------------------------|
| MID4 | denovo1060 | 3  | k_Bacteria:p__Proteobacteria:c__Alphaproteobacteria:o__Sphingomonadales:f__Sphingomonadaceae:g__               |
| MID4 | denovo1064 | 1  | k_Bacteria:p__Proteobacteria:c__Alphaproteobacteria:o__Rhizobiales:f__Hyphomicrobiaceae:g__                    |
| MID4 | denovo1067 | 1  | k_Bacteria:p__Proteobacteria:c__Alphaproteobacteria:o__Rhizobiales:f__Beijerinckiaceae:g__                     |
| MID4 | denovo1068 | 2  | k_Bacteria:p__Proteobacteria:c__Gammaproteobacteria:o__Xanthomonadales:f__Xanthomonadaceae:g__Stenotrophomonas |
| MID4 | denovo1069 | 1  | k_Bacteria:p__Firmicutes:c__Clostridia:o__Clostridiales:f__Ruminococcaceae:g__Ruminococcus                     |
| MID4 | denovo107  | 1  | k_Bacteria:p__Proteobacteria:c__Alphaproteobacteria:o__Rhodobacterales:f__Rhodobacteraceae:g__Rubellimicrobium |
| MID4 | denovo1073 | 1  | k_Bacteria:p__Proteobacteria:c__Gammaproteobacteria:o__Xanthomonadales:f__Xanthomonadaceae:g__Stenotrophomonas |
| MID4 | denovo1079 | 8  | k_Bacteria:p__Firmicutes:c__Bacilli:o__Lactobacillales:f__Aerococcaceae:g__Facklamia                           |
| MID4 | denovo108  | 1  | k_Bacteria:p__Actinobacteria:c__Actinobacteria:o__Actinomycetales:f__Microbacteriaceae:g__Microbacterium       |
| MID4 | denovo1084 | 4  | k_Bacteria:p__Proteobacteria:c__Alphaproteobacteria:o__Caulobacterales:f__Caulobacteraceae:g__                 |
| MID4 | denovo1086 | 4  | k_Bacteria:p__Actinobacteria:c__Actinobacteria:o__Actinomycetales:f__Nocardioideaceae:g__                      |
| MID4 | denovo1088 | 3  | k_Bacteria:p__Actinobacteria:c__Actinobacteria:o__Actinomycetales:f__Kineosporiaceae:g__                       |
| MID4 | denovo109  | 4  | k_Bacteria:p__Proteobacteria:c__Gammaproteobacteria:o__Enterobacterales:f__Enterobacteriaceae                  |
| MID4 | denovo1090 | 2  | k_Bacteria:p__Proteobacteria:c__Alphaproteobacteria:o__Rhodobacterales:f__Rhodobacteraceae:g__Amaricoccus      |
| MID4 | denovo1093 | 1  | k_Bacteria:p__Firmicutes:c__Bacilli:o__Lactobacillales:f__Lactobacillaceae:g__Lactobacillus                    |
| MID4 | denovo1094 | 51 | k_Bacteria:p__Firmicutes:c__Bacilli:o__Lactobacillales:f__Aerococcaceae:g__Facklamia                           |
| MID4 | denovo1096 | 1  | k_Bacteria:p__Proteobacteria:c__Gammaproteobacteria:o__Legionellales:f__g__                                    |
| MID4 | denovo1099 | 2  | k_Bacteria:p__Firmicutes:c__Clostridia:o__Clostridiales:f__Lachnospiraceae:g__                                 |
| MID4 | denovo1103 | 1  | k_Bacteria:p__Gemmatimonadetes:c__Gemmatimonadetes:o__Gemmatimonadales:f__g__                                  |
| MID4 | denovo1104 | 1  | k_Bacteria:p__Bacteroidetes:c__Bacteroidia:o__Bacteroidales:f__Prevotellaceae:g__Prevotella                    |
| MID4 | denovo1105 | 1  | k_Bacteria:p__Proteobacteria:c__Alphaproteobacteria:o__Rhodobacterales:f__Rhodobacteraceae:g__Rhodobacter      |
| MID4 | denovo1107 | 1  | k_Bacteria:p__Proteobacteria:c__Deltaproteobacteria:o__f__g__                                                  |
| MID4 | denovo1108 | 1  | k_Bacteria:p__Proteobacteria:c__Alphaproteobacteria:o__Caulobacterales:f__Caulobacteraceae                     |
| MID4 | denovo1111 | 1  | k_Bacteria:p__Bacteroidetes:c__Flavobacteriia:o__Flavobacteriales:f__Flavobacteriaceae:g__Flavobacterium       |
| MID4 | denovo1115 | 2  | k_Bacteria:p__Cyanobacteria:c__Synechococcophycideae:o__Pseudanabaenales:f__Pseudanabaenaceae:g__              |
| MID4 | denovo1117 | 1  | k_Bacteria:p__Proteobacteria:c__Alphaproteobacteria:o__Rhodospirillales:f__Acetobacteraceae:g__                |
| MID4 | denovo112  | 1  | k_Bacteria:p__Firmicutes:c__Clostridia:o__Clostridiales:f__Lachnospiraceae:g__                                 |
| MID4 | denovo1121 | 2  | k_Bacteria:p__Bacteroidetes:c__Flavobacteriia:o__Flavobacteriales:f__[Weeksellaceae]:g__Chryseobacterium       |
| MID4 | denovo1122 | 2  | k_Bacteria:p__Proteobacteria:c__Gammaproteobacteria:o__Legionellales:f__Coxiellaceae:g__Rickettsiella          |
| MID4 | denovo1127 | 1  | k_Bacteria:p__Actinobacteria:c__Actinobacteria:o__Actinomycetales:f__Nocardioideaceae                          |
| MID4 | denovo1128 | 1  | k_Bacteria:p__Acidobacteria:c__iii1-8:o__32-20:f__g__                                                          |
| MID4 | denovo1129 | 1  | k_Bacteria:p__Planctomycetes:c__Planctomycetia:o__Gemmatales:f__Isosphaeraceae:g__                             |
| MID4 | denovo114  | 1  | k_Bacteria:p__Cyanobacteria:c__Chloroplast:o__Chlorophyta:f__g__                                               |
| MID4 | denovo1149 | 5  | k_Bacteria:p__Proteobacteria:c__Alphaproteobacteria:o__Rhizobiales:f__Methylobacteriaceae:g__Methylobacterium  |
| MID4 | denovo115  | 2  | k_Bacteria:p__Gemmatimonadetes:c__Gemmatimonadetes:o__Gemmatimonadales:f__g__                                  |
| MID4 | denovo1150 | 5  | k_Bacteria:p__Firmicutes:c__Clostridia:o__Clostridiales:f__Lachnospiraceae:g__Roseburia                        |
| MID4 | denovo1151 | 3  | k_Bacteria:p__Firmicutes:c__Bacilli:o__Bacillales:f__Planococcaceae:g__Solibacillus                            |
| MID4 | denovo1152 | 3  | k_Bacteria:p__Cyanobacteria:c__Synechococcophycideae:o__Pseudanabaenales:f__Pseudanabaenaceae:g__Leptolyngbya  |
| MID4 | denovo1154 | 1  | k_Bacteria:p__Proteobacteria:c__Betaproteobacteria:o__Burkholderiales:f__Alcaligenaceae:g__Pigmentiphaga       |
| MID4 | denovo1156 | 1  | k_Bacteria:p__Proteobacteria:c__Gammaproteobacteria:o__Xanthomonadales:f__Xanthomonadaceae:g__Luteimonas       |
| MID4 | denovo1157 | 1  | k_Bacteria:p__Proteobacteria:c__Alphaproteobacteria:o__Rhodobacterales:f__Rhodobacteraceae:g__Amaricoccus      |
| MID4 | denovo1159 | 2  | k_Bacteria:p__Proteobacteria:c__Alphaproteobacteria:o__Rhizobiales:f__Bradyrhizobiaceae:g__                    |
| MID4 | denovo116  | 2  | k_Bacteria:p__Firmicutes:c__Bacilli:o__Lactobacillales:f__Streptococcaceae:g__Streptococcus                    |
| MID4 | denovo1161 | 2  | k_Bacteria:p__Firmicutes:c__Bacilli:o__Bacillales:f__Staphylococcaceae:g__Salinicoccus                         |
| MID4 | denovo1165 | 4  | k_Bacteria:p__Firmicutes:c__Clostridia:o__Clostridiales:f__[Tissierellaceae]:g__Anaerococcus                   |
| MID4 | denovo1167 | 2  | k_Bacteria:p__Firmicutes:c__Clostridia:o__Clostridiales:f__[Tissierellaceae]:g__Anaerococcus                   |
| MID4 | denovo1173 | 2  | k_Bacteria:p__Proteobacteria:c__Alphaproteobacteria:o__Rhodobacterales:f__Rhodobacteraceae:g__Paracoccus       |
| MID4 | denovo1177 | 1  | k_Bacteria:p__Proteobacteria:c__Gammaproteobacteria:o__Enterobacterales:f__Enterobacteriaceae                  |
| MID4 | denovo1178 | 3  | k_Bacteria:p__Firmicutes:c__Clostridia:o__Clostridiales:f__Lachnospiraceae:g__                                 |
| MID4 | denovo1185 | 1  | k_Bacteria:p__Bacteroidetes:c__Cytophagia:o__Cytophagales:f__Cytophagaceae:g__Emticicia                        |
| MID4 | denovo1186 | 1  | k_Bacteria:p__Firmicutes:c__Clostridia:o__Clostridiales:f__g__                                                 |
| MID4 | denovo1188 | 1  | k_Bacteria:p__Proteobacteria:c__Alphaproteobacteria:o__Rhizobiales:f__Rhodobiaceae:g__Afifella                 |
| MID4 | denovo1192 | 1  | k_Bacteria:p__Gemmatimonadetes:c__Gemmatimonadetes:o__Gemmatimonadales:f__g__                                  |
| MID4 | denovo1195 | 1  | k_Bacteria:p__Proteobacteria:c__Alphaproteobacteria:o__Rhizobiales:f__Phyllobacteriaceae:g__Aminobacter        |
| MID4 | denovo1196 | 1  | k_Bacteria:p__Planctomycetes:c__Planctomycetia:o__Gemmatales:f__Isosphaeraceae:g__                             |
| MID4 | denovo1202 | 7  | k_Bacteria:p__Proteobacteria:c__Alphaproteobacteria:o__Rhizobiales:f__Methylobacteriaceae:g__Methylobacterium  |
| MID4 | denovo1208 | 1  | k_Bacteria:p__Proteobacteria:c__Betaproteobacteria:o__Burkholderiales:f__Comamonadaceae:g__                    |
| MID4 | denovo1217 | 3  | k_Bacteria:p__Cyanobacteria:c__Chloroplast:o__Chlorophyta:f__g__                                               |
| MID4 | denovo122  | 1  | k_Bacteria:p__Firmicutes:c__Clostridia:o__Clostridiales:f__Ruminococcaceae:g__Ruminococcus                     |
| MID4 | denovo1227 | 2  | k_Bacteria:p__Proteobacteria:c__Alphaproteobacteria:o__Rhizobiales:f__Rhizobiaceae                             |
| MID4 | denovo123  | 2  | k_Bacteria:p__Fibrobacteres:c__Fibrobacteria:o__258ds10:f__g__                                                 |
| MID4 | denovo1231 | 4  | k_Bacteria:p__Proteobacteria:c__Alphaproteobacteria:o__Rhodobacterales:f__Rhodobacteraceae:g__Rubellimicrobium |
| MID4 | denovo1235 | 1  | k_Bacteria:p__Firmicutes:c__Clostridia:o__Clostridiales:f__Clostridiaceae:g__Clostridium                       |
| MID4 | denovo1236 | 1  | k_Bacteria:p__Bacteroidetes:c__Cytophagia:o__Cytophagales:f__Cytophagaceae:g__Rhodocytophaga                   |
| MID4 | denovo1239 | 2  | k_Bacteria:p__Firmicutes:c__Bacilli:o__Lactobacillales:f__Aerococcaceae:g__Facklamia                           |
| MID4 | denovo1244 | 3  | k_Bacteria:p__Proteobacteria:c__Alphaproteobacteria:o__Caulobacterales:f__Caulobacteraceae:g__                 |
| MID4 | denovo1245 | 1  | k_Bacteria:p__Armatimonadetes:c__Armatimonadia:o__Armatimonadales:f__Armatimonadaceae:g__                      |

|      |            |    |                                                                                                                  |
|------|------------|----|------------------------------------------------------------------------------------------------------------------|
| MID4 | denovo1246 | 1  | k__Bacteria:p__Acidobacteria:c__Acidobacteria-6:o__iii1-15:f__mb2424:g__                                         |
| MID4 | denovo1247 | 1  | k__Bacteria:p__Proteobacteria:c__Gammaproteobacteria:o__Xanthomonadales:f__Xanthomonadaceae                      |
| MID4 | denovo1252 | 2  | k__Bacteria:p__Proteobacteria:c__Alphaproteobacteria:o__Rhizobiales:f__Methylobacteriaceae:g__Methylobacterium   |
| MID4 | denovo1253 | 7  | k__Bacteria:p__Proteobacteria:c__Alphaproteobacteria:o__Rhizobiales:f__Rhizobiaceae:g__Agrobacterium             |
| MID4 | denovo1255 | 1  | k__Bacteria:p__Bacteroidetes:c__Bacteroidia:o__Bacteroidales:f__Prevotellaceae:g__Prevotella                     |
| MID4 | denovo1257 | 21 | k__Bacteria:p__Proteobacteria:c__Alphaproteobacteria:o__Sphingomonadales:f__Sphingomonadaceae                    |
| MID4 | denovo1258 | 2  | k__Bacteria:p__Proteobacteria:c__Alphaproteobacteria:o__Rhodospirillales:f__Acetobacteraceae:g__                 |
| MID4 | denovo1261 | 2  | k__Bacteria:p__Bacteroidetes:c__Cytophagia:o__Cytophagales:f__Cytophagaceae:g__Rudanella                         |
| MID4 | denovo1273 | 1  | k__Bacteria:p__Armatimonadetes:c__0319-6E2:o__f__g__                                                             |
| MID4 | denovo1277 | 1  | k__Bacteria:p__Firmicutes:c__Bacilli:o__Bacillales:f__Paenibacillaceae:g__Paenibacillus                          |
| MID4 | denovo1278 | 1  | k__Bacteria:p__Proteobacteria:c__Alphaproteobacteria:o__Rhizobiales:f__Methylobacteriaceae:g__Methylobacterium   |
| MID4 | denovo1279 | 2  | k__Bacteria:p__Firmicutes:c__Bacilli:o__Lactobacillales                                                          |
| MID4 | denovo1282 | 1  | k__Bacteria:p__Planctomycetes:c__Planctomycetia:o__Gemmatales:f__Isosphaeraceae:g__                              |
| MID4 | denovo1287 | 4  | k__Bacteria:p__Actinobacteria:c__Actinobacteria:o__Actinomycetales:f__Corynebacteriaceae:g__Corynebacterium      |
| MID4 | denovo1289 | 1  | k__Bacteria:p__Chloroflexi:c__Thermomicrobia:o__JG30-KF-CM45:f__g__                                              |
| MID4 | denovo1290 | 10 | k__Bacteria:p__Actinobacteria:c__Actinobacteria:o__Actinomycetales:f__Dermabacteraceae:g__Brachybacterium        |
| MID4 | denovo1291 | 2  | k__Bacteria:p__Bacteroidetes:c__Flavobacteriia:o__Flavobacteriales:f__Flavobacteriaceae:g__Flavobacterium        |
| MID4 | denovo1295 | 1  | k__Bacteria:p__Bacteroidetes:c__Bacteroidia:o__Bacteroidales:f__Porphyromonadaceae:g__Porphyromonas              |
| MID4 | denovo1300 | 14 | k__Bacteria:p__Actinobacteria:c__Actinobacteria:o__Actinomycetales:f__Nocardiodiaceae:g__Friedmanniella          |
| MID4 | denovo1301 | 2  | k__Bacteria:p__Actinobacteria:c__Coriobacteriia:o__Coriobacteriales:f__Coriobacteriaceae:g__Collinsella          |
| MID4 | denovo1303 | 1  | k__Bacteria:p__Actinobacteria:c__Actinobacteria:o__Actinomycetales:f__Propionibacteriaceae:g__                   |
| MID4 | denovo1306 | 1  | k__Bacteria:p__Proteobacteria:c__Alphaproteobacteria:o__Rhizobiales:f__g__                                       |
| MID4 | denovo1308 | 10 | k__Bacteria:p__Firmicutes:c__Bacilli:o__Lactobacillales:f__Streptococcaceae:g__Streptococcus                     |
| MID4 | denovo131  | 2  | k__Bacteria:p__Actinobacteria:c__Acidimicrobiia:o__Acidimicrobiales:f__g__                                       |
| MID4 | denovo1311 | 3  | k__Bacteria:p__Firmicutes:c__Clostridia:o__Clostridiales:f__Clostridiaceae:g__                                   |
| MID4 | denovo1313 | 1  | k__Bacteria:p__Acidobacteria:c__Solibacteres:o__Solibacterales:f__g__                                            |
| MID4 | denovo1315 | 1  | k__Bacteria:p__Firmicutes:c__Clostridia:o__Clostridiales:f__g__                                                  |
| MID4 | denovo132  | 1  | k__Bacteria:p__Proteobacteria:c__Alphaproteobacteria:o__Sphingomonadales:f__Erythrobacteraceae:g__               |
| MID4 | denovo1321 | 1  | k__Bacteria:p__Actinobacteria:c__Actinobacteria:o__Actinomycetales:f__Pseudonocardiaceae:g__                     |
| MID4 | denovo1324 | 1  | k__Bacteria:p__Proteobacteria:c__Alphaproteobacteria:o__Rhodospirillales:f__Acetobacteraceae:g__                 |
| MID4 | denovo1329 | 1  | k__Bacteria:p__Acidobacteria:c__[Chloracidobacteria]:o__RB41:f__Ellin6075:g__                                    |
| MID4 | denovo1330 | 1  | k__Bacteria:p__Bacteroidetes:c__Bacteroidia:o__Bacteroidales:f__Prevotellaceae:g__Prevotella                     |
| MID4 | denovo1334 | 38 | k__Bacteria:p__Firmicutes:c__Bacilli:o__Lactobacillales:f__Streptococcaceae:g__Streptococcus                     |
| MID4 | denovo1339 | 1  | k__Bacteria:p__Actinobacteria:c__Acidimicrobiia:o__Acidimicrobiales:f__C111:g__                                  |
| MID4 | denovo134  | 15 | k__Bacteria:p__Firmicutes:c__Bacilli:o__Lactobacillales:f__g__                                                   |
| MID4 | denovo1341 | 8  | k__Bacteria:p__Firmicutes:c__Clostridia:o__Clostridiales:f__[Tissierellaceae]:g__Anaerococcus                    |
| MID4 | denovo1343 | 2  | k__Bacteria:p__Proteobacteria:c__Alphaproteobacteria:o__Sphingomonadales:f__Sphingomonadaceae:g__Sphingomonas    |
| MID4 | denovo1345 | 1  | k__Bacteria:p__Firmicutes:c__Bacilli:o__Bacillales:f__Allicyclobacillaceae:g__Allicyclobacillus                  |
| MID4 | denovo1346 | 9  | k__Bacteria:p__Firmicutes:c__Bacilli:o__Lactobacillales:f__Streptococcaceae:g__Lactococcus                       |
| MID4 | denovo1347 | 1  | k__Bacteria:p__Proteobacteria:c__Gammaproteobacteria:o__Xanthomonadales:f__Xanthomonadaceae:g__Luteibacter       |
| MID4 | denovo1350 | 37 | k__Bacteria:p__Firmicutes:c__Clostridia:o__Clostridiales:f__[Tissierellaceae]:g__Anaerococcus                    |
| MID4 | denovo1351 | 1  | k__Bacteria:p__Proteobacteria:c__Alphaproteobacteria:o__Rhizobiales:f__Methylocystaceae:g__                      |
| MID4 | denovo136  | 1  | k__Bacteria:p__Chloroflexi:c__Chloroflexi:o__[Roseiflexales]:f__g__                                              |
| MID4 | denovo137  | 3  | k__Bacteria:p__Cyanobacteria:c__Chloroplast:o__Chlorophyta:f__g__                                                |
| MID4 | denovo138  | 1  | k__Bacteria:p__Proteobacteria:c__Alphaproteobacteria:o__Rhodospirillales:f__Rhodospirillaceae:g__Skermanella     |
| MID4 | denovo145  | 1  | k__Bacteria:p__Bacteroidetes:c__Bacteroidia:o__Bacteroidales:f__Prevotellaceae:g__Prevotella                     |
| MID4 | denovo15   | 1  | k__Bacteria:p__[Thermi]:c__Deinococci:o__Deinococcales:f__Trueperaceae:g__Truepera                               |
| MID4 | denovo152  | 1  | k__Bacteria:p__Actinobacteria:c__Thermoleophilia:o__Solirubrobacterales:f__g__                                   |
| MID4 | denovo155  | 4  | k__Bacteria:p__Proteobacteria:c__Alphaproteobacteria:o__Rhodobacterales:f__Rhodobacteraceae:g__Rubellimicrobium  |
| MID4 | denovo156  | 1  | k__Bacteria:p__Acidobacteria:c__[Chloracidobacteria]:o__RB41:f__g__                                              |
| MID4 | denovo158  | 3  | k__Bacteria:p__Proteobacteria:c__Alphaproteobacteria:o__Sphingomonadales:f__Sphingomonadaceae:g__                |
| MID4 | denovo165  | 1  | k__Bacteria:p__Proteobacteria:c__Deltaproteobacteria:o__Spirobacillales:f__g__                                   |
| MID4 | denovo169  | 1  | k__Bacteria:p__Actinobacteria:c__Acidimicrobiia:o__Acidimicrobiales:f__g__                                       |
| MID4 | denovo170  | 1  | k__Bacteria:p__Firmicutes:c__Clostridia:o__Clostridiales:f__[Tissierellaceae]:g__Anaerococcus                    |
| MID4 | denovo174  | 1  | k__Bacteria:p__Proteobacteria:c__Alphaproteobacteria:o__Sphingomonadales:f__Sphingomonadaceae:g__                |
| MID4 | denovo175  | 1  | k__Bacteria:p__Firmicutes:c__Clostridia:o__Clostridiales:f__g__                                                  |
| MID4 | denovo178  | 2  | k__Bacteria:p__Bacteroidetes:c__[Rhodothermi]:o__[Rhodothermales]:f__Rhodothermaceae:g__Rubricoccus              |
| MID4 | denovo18   | 3  | k__Bacteria:p__Proteobacteria:c__Gammaproteobacteria:o__Pseudomonadales:f__Pseudomonadaceae:g__Pseudomonas       |
| MID4 | denovo180  | 1  | k__Bacteria:p__Proteobacteria:c__Alphaproteobacteria:o__Caulobacterales:f__Caulobacteraceae:g__Phenyllobacterium |
| MID4 | denovo181  | 1  | k__Bacteria:p__Proteobacteria:c__Alphaproteobacteria:o__Rhodospirillales:f__Rhodospirillaceae:g__                |
| MID4 | denovo183  | 86 | k__Bacteria:p__Cyanobacteria:c__Oscillatoriophycideae:o__Chroococcales:f__Xenococcaceae                          |
| MID4 | denovo184  | 12 | k__Bacteria:p__Firmicutes:c__Clostridia:o__Clostridiales:f__[Tissierellaceae]:g__Peptoniphilus                   |
| MID4 | denovo185  | 6  | k__Bacteria:p__Proteobacteria:c__Gammaproteobacteria:o__Xanthomonadales:f__Xanthomonadaceae:g__                  |
| MID4 | denovo186  | 2  | k__Bacteria:p__Proteobacteria:c__Alphaproteobacteria:o__Rhizobiales:f__Bradyrhizobiaceae:g__Balneimonas          |
| MID4 | denovo187  | 8  | k__Bacteria:p__Firmicutes:c__Clostridia:o__Clostridiales:f__Clostridiaceae:g__                                   |
| MID4 | denovo190  | 1  | k__Bacteria:p__Proteobacteria:c__Alphaproteobacteria:o__Sphingomonadales:f__Sphingomonadaceae:g__                |
| MID4 | denovo191  | 2  | k__Bacteria:p__Firmicutes:c__Clostridia:o__Clostridiales:f__[Tissierellaceae]:g__                                |

|      |           |    |                                                                                                                 |
|------|-----------|----|-----------------------------------------------------------------------------------------------------------------|
| MID4 | denovo193 | 2  | k_Bacteria:p__Proteobacteria:c__Alphaproteobacteria:o__Caulobacteriales:f__Caulobacteraceae:g__Phenylobacterium |
| MID4 | denovo194 | 1  | k_Bacteria:p__Firmicutes:c__Bacilli:o__Bacillales:f__Paenibacillaceae:g__                                       |
| MID4 | denovo202 | 3  | k_Bacteria:p__Proteobacteria:c__Alphaproteobacteria:o__Rhizobiales:f__Hyphomicrobiaceae:g__Devosia              |
| MID4 | denovo204 | 1  | k_Bacteria:p__Firmicutes:c__Clostridia:o__Clostridiales:f__g__                                                  |
| MID4 | denovo206 | 1  | k_Bacteria:p__Acidobacteria:c__[Chloracidobacteria]:o__DS-100:f__g__                                            |
| MID4 | denovo207 | 4  | k_Bacteria:p__Actinobacteria:c__Acidimicrobia:o__Acidimicrobiales:f__C111:g__                                   |
| MID4 | denovo21  | 1  | k_Bacteria:p__Firmicutes:c__Bacilli:o__Lactobacillales:f__g__                                                   |
| MID4 | denovo210 | 4  | k_Bacteria:p__Proteobacteria:c__Gammaproteobacteria:o__Xanthomonadales:f__Xanthomonadaceae:g__                  |
| MID4 | denovo213 | 1  | k_Bacteria:p__Proteobacteria:c__Gammaproteobacteria:o__Xanthomonadales:f__Xanthomonadaceae:g__Luteimonas        |
| MID4 | denovo218 | 4  | k_Bacteria:p__Cyanobacteria:c__Oscillatoriophyceidae:o__Oscillatoriales:f__Phormidiaceae:g__Phormidium          |
| MID4 | denovo219 | 3  | k_Bacteria:p__Proteobacteria:c__Alphaproteobacteria:o__Rhodobacterales:f__Rhodobacteraceae:g__Rubellimicrobium  |
| MID4 | denovo228 | 1  | k_Bacteria:p__Proteobacteria:c__Alphaproteobacteria:o__Sphingomonadales:f__Sphingomonadaceae:g__Sphingomonas    |
| MID4 | denovo23  | 1  | k_Bacteria:p__Cyanobacteria:c__Oscillatoriophyceidae:o__Chroococcales:f__Xenococcaceae:g__                      |
| MID4 | denovo232 | 46 | k_Bacteria:p__Firmicutes:c__Clostridia:o__Clostridiales:f__[Tissierellaceae]:g__Anaerococcus                    |
| MID4 | denovo236 | 1  | k_Bacteria:p__Actinobacteria:c__Actinobacteria:o__Actinomycetales:f__Geodermatophilaceae:g__                    |
| MID4 | denovo241 | 1  | k_Bacteria:p__Proteobacteria:c__Alphaproteobacteria:o__Rhodospirillales:f__g__                                  |
| MID4 | denovo246 | 3  | k_Bacteria:p__Acidobacteria:c__Solibacteres:o__Solibacteriales:f__Solibacteraceae:g__                           |
| MID4 | denovo247 | 1  | k_Bacteria:p__Firmicutes:c__Clostridia:o__Clostridiales:f__g__                                                  |
| MID4 | denovo249 | 1  | k_Bacteria:p__Proteobacteria:c__Deltaproteobacteria:o__Myxococcales:f__g__                                      |
| MID4 | denovo25  | 2  | k_Bacteria:p__Firmicutes:c__Clostridia:o__Clostridiales:f__Lachnospiraceae:g__                                  |
| MID4 | denovo252 | 5  | k_Bacteria:p__Actinobacteria:c__Actinobacteria:o__Actinomycetales:f__Intrasporangiaceae:g__Kytococcus           |
| MID4 | denovo261 | 1  | k_Bacteria:p__Actinobacteria:c__Thermoleophila:o__Gaiellales:f__Gaiellaceae:g__                                 |
| MID4 | denovo269 | 1  | k_Bacteria:p__Proteobacteria:c__Betaproteobacteria:o__f__g__                                                    |
| MID4 | denovo272 | 8  | k_Bacteria:p__Proteobacteria:c__Alphaproteobacteria:o__Rhodobacterales:f__Rhodobacteraceae:g__Rubellimicrobium  |
| MID4 | denovo274 | 3  | k_Bacteria:p__Firmicutes:c__Clostridia:o__Clostridiales:f__Ruminococcaceae:g__Ruminococcus                      |
| MID4 | denovo281 | 3  | k_Bacteria:p__Cyanobacteria:c__Oscillatoriophyceidae:o__Chroococcales:f__Xenococcaceae:g__                      |
| MID4 | denovo282 | 1  | k_Bacteria:p__Proteobacteria:c__Gammaproteobacteria:o__Xanthomonadales:f__Xanthomonadaceae:g__Stenotrophomonas  |
| MID4 | denovo284 | 1  | k_Bacteria:p__Firmicutes:c__Bacilli:o__Lactobacillales:f__Streptococcaceae:g__Streptococcus                     |
| MID4 | denovo288 | 4  | k_Bacteria:p__Proteobacteria:c__Alphaproteobacteria:o__Caulobacteriales:f__Caulobacteraceae:g__                 |
| MID4 | denovo29  | 1  | k_Bacteria:p__Firmicutes:c__Clostridia:o__Clostridiales:f__g__                                                  |
| MID4 | denovo294 | 1  | k_Bacteria:p__Firmicutes:c__Clostridia:o__Clostridiales:f__[Tissierellaceae]:g__Peptoniphilus                   |
| MID4 | denovo296 | 9  | k_Bacteria:p__Firmicutes:c__Clostridia:o__Clostridiales:f__[Tissierellaceae]:g__WAL_185D                        |
| MID4 | denovo297 | 1  | k_Bacteria:p__Proteobacteria:c__Alphaproteobacteria:o__Rhodospirillales:f__Acetobacteraceae:g__                 |
| MID4 | denovo310 | 5  | k_Bacteria:p__Cyanobacteria:c__Synechococcophycideae:o__Pseudanabaenales:f__Pseudanabaenaceae:g__Leptolyngbya   |
| MID4 | denovo316 | 1  | k_Bacteria:p__Bacteroidetes:c__Flavobacteriia:o__Flavobacteriales:f__Flavobacteriaceae:g__Flavobacterium        |
| MID4 | denovo321 | 2  | k_Bacteria:p__Actinobacteria:c__Actinobacteria:o__Actinomycetales:f__Micrococcaceae:g__Nesterenkonia            |
| MID4 | denovo325 | 4  | k_Bacteria:p__Firmicutes:c__Clostridia:o__Clostridiales:f__[Tissierellaceae]:g__Anaerococcus                    |
| MID4 | denovo327 | 2  | k_Bacteria:p__Actinobacteria:c__Actinobacteria:o__Actinomycetales:f__Pseudonocardiaceae:g__Pseudonocardia       |
| MID4 | denovo329 | 2  | k_Bacteria:p__Acidobacteria:c__Acidobacteriia:o__Acidobacteriales:f__Acidobacteriaceae:g__                      |
| MID4 | denovo330 | 1  | k_Bacteria:p__Gemmatimonadetes:c__Gemm-5:o__f__g__                                                              |
| MID4 | denovo335 | 1  | k_Bacteria:p__Actinobacteria:c__Actinobacteria:o__Actinomycetales:f__Micrococcaceae:g__Arthrobacter             |
| MID4 | denovo340 | 5  | k_Bacteria:p__Cyanobacteria:c__Chloroplast:o__Chlorophyta:f__g__                                                |
| MID4 | denovo345 | 1  | k_Bacteria:p__Firmicutes:c__Clostridia:o__Clostridiales:f__Clostridiaceae:g__Clostridium                        |
| MID4 | denovo346 | 1  | k_Bacteria:p__Proteobacteria:c__Betaproteobacteria:o__Burkholderiales:f__Oxalobacteraceae:g__                   |
| MID4 | denovo347 | 1  | k_Bacteria:p__Cyanobacteria:c__Oscillatoriophyceidae:o__Chroococcales:f__Xenococcaceae:g__                      |
| MID4 | denovo349 | 2  | k_Bacteria:p__Proteobacteria:c__Alphaproteobacteria:o__Sphingomonadales:f__Erythrobacteraceae:g__               |
| MID4 | denovo350 | 1  | k_Bacteria:p__Firmicutes:c__Clostridia:o__Clostridiales:f__Clostridiaceae:g__Clostridium                        |
| MID4 | denovo353 | 14 | k_Bacteria:p__Proteobacteria:c__Alphaproteobacteria:o__Rhodobacterales:f__Rhodobacteraceae:g__Rubellimicrobium  |
| MID4 | denovo355 | 1  | k_Bacteria:p__Bacteroidetes:c__Bacteroidia:o__Bacteroidales:f__Prevotellaceae:g__Prevotella                     |
| MID4 | denovo357 | 5  | k_Bacteria:p__Actinobacteria:c__Actinobacteria:o__Actinomycetales:f__Corynebacteriaceae:g__Corynebacterium      |
| MID4 | denovo370 | 1  | k_Bacteria:p__Actinobacteria:c__Actinobacteria:o__Actinomycetales:f__Propionibacteriaceae:g__Propionibacterium  |
| MID4 | denovo371 | 1  | k_Bacteria:p__Firmicutes:c__Clostridia:o__Clostridiales:f__g__                                                  |
| MID4 | denovo376 | 1  | k_Bacteria:p__[Thermi]:c__Deinococci:o__Deinococcales:f__Deinococcaceae:g__Deinococcus                          |
| MID4 | denovo377 | 1  | k_Bacteria:p__Actinobacteria:c__Actinobacteria:o__Actinomycetales:f__Nocardioideaceae:g__Propionimicromonas     |
| MID4 | denovo381 | 1  | k_Bacteria:p__Firmicutes:c__Clostridia:o__Clostridiales:f__Clostridiaceae:g__Clostridium                        |
| MID4 | denovo383 | 1  | k_Bacteria:p__Actinobacteria:c__Thermoleophila:o__Gaiellales:f__Gaiellaceae:g__                                 |
| MID4 | denovo385 | 3  | k_Bacteria:p__Bacteroidetes:c__Bacteroidia:o__Bacteroidales:f__Bacteroidaceae:g__Bacteroides                    |
| MID4 | denovo387 | 1  | k_Bacteria:p__Proteobacteria:c__Gammaproteobacteria:o__Aeromonadales:f__Aeromonadaceae:g__                      |
| MID4 | denovo390 | 1  | k_Bacteria:p__Actinobacteria:c__Actinobacteria:o__Actinomycetales:f__Microbacteriaceae:g__Frigoribacterium      |
| MID4 | denovo393 | 18 | k_Bacteria:p__Proteobacteria:c__Gammaproteobacteria:o__Xanthomonadales:f__Xanthomonadaceae:g__Lysobacter        |
| MID4 | denovo402 | 1  | k_Bacteria:p__Bacteroidetes:c__Bacteroidia:o__Bacteroidales:f__\$24-7:g__                                       |
| MID4 | denovo403 | 12 | k_Bacteria:p__Proteobacteria:c__Gammaproteobacteria:o__Enterobacteriales:f__Enterobacteriaceae:g__Buchnera      |
| MID4 | denovo404 | 5  | k_Bacteria:p__Firmicutes:c__Bacilli:o__Lactobacillales:f__Enterococcaceae:g__Enterococcus                       |
| MID4 | denovo408 | 1  | k_Bacteria:p__Proteobacteria:c__Gammaproteobacteria:o__Pseudomonadales:f__Moraxellaceae:g__                     |
| MID4 | denovo409 | 1  | k_Bacteria:p__Actinobacteria:c__Actinobacteria:o__Actinomycetales:f__Nakamurellaceae:g__                        |
| MID4 | denovo414 | 1  | k_Bacteria:p__Proteobacteria:c__Alphaproteobacteria:o__Caulobacteriales:f__Caulobacteraceae:g__                 |
| MID4 | denovo415 | 9  | k_Bacteria:p__Cyanobacteria:c__Synechococcophycideae:o__Pseudanabaenales:f__Pseudanabaenaceae:g__Leptolyngbya   |

|      |           |     |                                                                                                             |
|------|-----------|-----|-------------------------------------------------------------------------------------------------------------|
| MID4 | denovo427 | 4   | k_Bacteria:p_Bacteroidetes:c_Bacteroidia:o_Bacteroidales:f_Prevotellaceae:g_Prevotella                      |
| MID4 | denovo431 | 1   | k_Bacteria:p_Proteobacteria:c_Alphaproteobacteria:o_Rhizobiales:f_Methylobacteriaceae:g_Methylobacterium    |
| MID4 | denovo432 | 2   | k_Bacteria:p_Cyanobacteria:c_Synechococcophycideae:o_Pseudanabaenales:f_Pseudanabaenaceae:g_Leptolyngbya    |
| MID4 | denovo437 | 5   | k_Bacteria:p_Bacteroidetes:c_Bacteroidia:o_Bacteroidales:f_Prevotellaceae:g_Prevotella                      |
| MID4 | denovo440 | 1   | k_Bacteria:p_Firmicutes:c_Clostridia:o_Clostridiales:f_Ruminococcaceae:g_Oscillospira                       |
| MID4 | denovo441 | 1   | k_Bacteria:p_Proteobacteria:c_Alphaproteobacteria:o_Rhizobiales:f_Phyllobacteriaceae:g_Aminobacter          |
| MID4 | denovo446 | 1   | k_Bacteria:p_Proteobacteria:c_Alphaproteobacteria:o_Rhodospirillales:f_Rhodospirillaceae:g__                |
| MID4 | denovo448 | 4   | k_Bacteria:p_Actinobacteria:c_Coriobacterii:o_Coriobacteriales:f_Coriobacteriaceae:g__                      |
| MID4 | denovo45  | 2   | k_Bacteria:p_Actinobacteria:c_Actinobacteria:o_Actinomycetales:f_Kineosporiaceae:g__                        |
| MID4 | denovo458 | 1   | k_Bacteria:p_Actinobacteria:c_Actinobacteria:o_Actinomycetales:f__g__                                       |
| MID4 | denovo470 | 1   | k_Bacteria:p_Actinobacteria:c_Actinobacteria:o_Actinomycetales:f__g__                                       |
| MID4 | denovo471 | 1   | k_Bacteria:p_Proteobacteria:c_Alphaproteobacteria:o_Rhizobiales:f_Hyphomicrobiaceae:g_Devesia               |
| MID4 | denovo472 | 1   | k_Bacteria:p_Bacteroidetes:c_[Rhodothermi]:o_[Rhodothermales]:f_Rhodothermaceae:g_Rubricoccus               |
| MID4 | denovo476 | 1   | k_Bacteria:p_Firmicutes:c_Bacilli:o_Lactobacillales:f_Aerococcaceae:g_Facklamia                             |
| MID4 | denovo478 | 1   | k_Bacteria:p_Actinobacteria:c_Thermoleophilla:o_Solirubrobacterales:f_Conexibacteraceae:g__                 |
| MID4 | denovo480 | 1   | k_Bacteria:p_Firmicutes:c_Bacilli:o_Lactobacillales:f_Aerococcaceae:g__                                     |
| MID4 | denovo481 | 1   | k_Bacteria:p_Bacteroidetes:c_Bacteroidia:o_Bacteroidales:f_[Paraprevotellaceae]:g_[Prevotella]              |
| MID4 | denovo484 | 1   | k_Bacteria:p_Actinobacteria:c_Thermoleophilla:o_Solirubrobacterales:f__g__                                  |
| MID4 | denovo485 | 1   | k_Bacteria:p_Firmicutes:c_Clostridia:o_Clostridiales:f_Lachnospiraceae:g_Blautia                            |
| MID4 | denovo486 | 1   | k_Bacteria:p_Cyanobacteria:c_Chloroplast:o_Streptophyta:f__g__                                              |
| MID4 | denovo487 | 63  | k_Bacteria:p_Actinobacteria:c_Actinobacteria:o_Actinomycetales:f_Dermabacteraceae:g_Dermabacter             |
| MID4 | denovo489 | 1   | k_Bacteria:p_Proteobacteria:c_Gammaproteobacteria:o_Pseudomonadales:f_Pseudomonadaceae:g__                  |
| MID4 | denovo492 | 69  | k_Bacteria:p_Bacteroidetes:c_Oscillatoriohaptophycideae:o_Chroococcales:f_Xenococcaceae:g_Chroococcidiopsis |
| MID4 | denovo494 | 1   | k_Bacteria:p_Firmicutes:c_Clostridia:o_Clostridiales:f_Lachnospiraceae:g_Coproccoccus                       |
| MID4 | denovo495 | 1   | k_Bacteria:p_Actinobacteria:c_Actinobacteria:o_Actinomycetales:f_Streptomyetaceae:g_Streptomyces            |
| MID4 | denovo498 | 3   | k_Bacteria:p_Proteobacteria:c_Betaproteobacteria:o_Burkholderiales:f__g__                                   |
| MID4 | denovo5   | 1   | k_Bacteria:p_Proteobacteria:c_Alphaproteobacteria:o_Rhodobacterales:f_Rhodobacteraceae:g_Rubellimicrobium   |
| MID4 | denovo500 | 7   | k_Bacteria:p_Cyanobacteria:c_Oscillatoriohaptophycideae:o_Chroococcales:f_Xenococcaceae:g__                 |
| MID4 | denovo502 | 1   | k_Bacteria:p_Firmicutes:c_Bacilli:o_Lactobacillales:f_Leuconostocaceae:g_Leuconostoc                        |
| MID4 | denovo504 | 1   | k_Bacteria:p_Proteobacteria:c_Alphaproteobacteria:o_Rhodospirillales:f_Rhodospirillaceae:g__                |
| MID4 | denovo509 | 1   | k_Bacteria:p_Proteobacteria:c_Alphaproteobacteria:o_Rickettsiales:f__g__                                    |
| MID4 | denovo51  | 1   | k_Bacteria:p_Nitrospirae:c_Nitrospira:o_Nitrospirales:f_Nitrospiraceae:g_Nitrospira                         |
| MID4 | denovo511 | 6   | k_Bacteria:p_Bacteroidetes:c_Flavobacterii:o_Flavobacteriales:f_[Weeksellaceae]:g_Chryseobacterium          |
| MID4 | denovo515 | 2   | k_Bacteria:p_Actinobacteria:c_Thermoleophilla:o_Gaiellales:f_Gaiellaceae:g__                                |
| MID4 | denovo517 | 2   | k_Bacteria:p_Proteobacteria:c_Alphaproteobacteria:o_Caulobacterales:f_Caulobacteraceae:g__                  |
| MID4 | denovo520 | 2   | k_Bacteria:p_Acidobacteria:c_[Chloracidobacteria]:o_RB41:f_Ellin6075:g__                                    |
| MID4 | denovo521 | 1   | k_Bacteria:p_Proteobacteria:c_Betaproteobacteria:o__f__g__                                                  |
| MID4 | denovo528 | 1   | k_Bacteria:p_Bacteroidetes:c_Cytophagia:o_Cytophagales:f_Cytophagaceae:g__                                  |
| MID4 | denovo530 | 1   | k_Bacteria:p_Firmicutes:c_Bacilli:o_Lactobacillales:f_Lactobacillaceae:g_Lactobacillus                      |
| MID4 | denovo54  | 1   | k_Bacteria:p_Planctomycetes:c_Planctomycetia:o_Planctomycetales:f_Planctomycetaceae:g_Planctomyces          |
| MID4 | denovo540 | 2   | k_Bacteria:p_Firmicutes:c_Bacilli:o_Bacillales:f_Bacillaceae:g_Bacillus                                     |
| MID4 | denovo542 | 125 | k_Bacteria:p_Firmicutes:c_Clostridia:o_Clostridiales:f_[Tissierellaceae]:g_Finegoldia                       |
| MID4 | denovo550 | 1   | k_Bacteria:p_Firmicutes:c_Clostridia:o_Clostridiales:f__g__                                                 |
| MID4 | denovo553 | 1   | k_Bacteria:p_Chloroflexi:c_TK17:o_mle1-48:f__g__                                                            |
| MID4 | denovo555 | 2   | k_Bacteria:p_Cyanobacteria:c_Oscillatoriohaptophycideae:o_Chroococcales:f_Xenococcaceae:g__                 |
| MID4 | denovo559 | 1   | k_Bacteria:p_Bacteroidetes:c_Bacteroidia:o_Bacteroidales:f_p-2534-18B5:g__                                  |
| MID4 | denovo56  | 2   | k_Bacteria:p_Proteobacteria:c_Alphaproteobacteria:o_Rhodobacterales:f_Rhodobacteraceae:g_Rubellimicrobium   |
| MID4 | denovo561 | 3   | k_Bacteria:p_Firmicutes:c_Clostridia:o_Clostridiales:f_Lachnospiraceae:g_Coproccoccus                       |
| MID4 | denovo565 | 1   | k_Bacteria:p_Acidobacteria:c_[Chloracidobacteria]:o_RB41:f__g__                                             |
| MID4 | denovo566 | 3   | k_Bacteria:p_Gemmatimonadetes:c_Gemmatimonadetes:o_Gemmatimonadales:f__g__                                  |
| MID4 | denovo567 | 1   | k_Bacteria:p_Proteobacteria:c_Gammaproteobacteria:o_Xanthomonadales:f_Xanthomonadaceae:g__                  |
| MID4 | denovo569 | 1   | k_Bacteria:p_[Therml]:c_Deinococci:o_Deinococcales:f_Deinococcaceae:g_Deinococcus                           |
| MID4 | denovo57  | 1   | k_Bacteria:p_Proteobacteria:c_Alphaproteobacteria:o_Sphingomonadales:f_Sphingomonadaceae                    |
| MID4 | denovo570 | 1   | k_Bacteria:p_Proteobacteria:c_Gammaproteobacteria:o_Xanthomonadales:f_Xanthomonadaceae:g_Xanthomonas        |
| MID4 | denovo572 | 1   | k_Bacteria:p_Bacteroidetes:c_Cytophagia:o_Cytophagales:f_Cytophagaceae:g_Hymenobacter                       |
| MID4 | denovo574 | 1   | k_Bacteria:p_Proteobacteria:c_Alphaproteobacteria:o_Rhizobiales:f_Methylocystaceae:g__                      |
| MID4 | denovo586 | 2   | k_Bacteria:p_Planctomycetes:c_Planctomycetia:o_Gemmatales:f_Isosphaeraceae:g__                              |
| MID4 | denovo587 | 1   | k_Bacteria:p_Cyanobacteria:c_Nostocophycideae                                                               |
| MID4 | denovo59  | 2   | k_Bacteria:p_Proteobacteria:c_Alphaproteobacteria:o_Rhodospirillales:f_Acetobacteraceae:g__                 |
| MID4 | denovo592 | 1   | k_Bacteria:p_Firmicutes:c_Clostridia:o_Clostridiales:f_Clostridiaceae:g__                                   |
| MID4 | denovo594 | 1   | k_Bacteria:p_Nitrospirae:c_Nitrospira:o_Nitrospirales:f_Nitrospiraceae:g_Nitrospira                         |
| MID4 | denovo595 | 1   | k_Bacteria:p_Proteobacteria:c_Alphaproteobacteria:o_Rhodobacterales:f_Rhodobacteraceae:g_Amaricoccus        |
| MID4 | denovo600 | 20  | k_Bacteria:p_Cyanobacteria:c_Oscillatoriohaptophycideae:o_Oscillatoriales:f_Phormidiaceae:g_Phormidium      |
| MID4 | denovo601 | 1   | k_Bacteria:p_Actinobacteria:c_Actinobacteria:o_Actinomycetales:f_Geodermatophilaceae:g_Modestobacter        |
| MID4 | denovo603 | 1   | k_Bacteria:p_Actinobacteria:c_Thermoleophilla:o_Gaiellales:f_Gaiellaceae:g__                                |
| MID4 | denovo604 | 1   | k_Bacteria:p_Proteobacteria:c_Alphaproteobacteria:o_Rhizobiales:f__g__                                      |
| MID4 | denovo605 | 4   | k_Bacteria:p_Firmicutes:c_Bacilli:o_Gemellales:f_Gemellaceae:g_Gemella                                      |

|      |           |    |                                                                                                                        |
|------|-----------|----|------------------------------------------------------------------------------------------------------------------------|
| MID4 | denovo607 | 1  | Unassigned                                                                                                             |
| MID4 | denovo608 | 1  | k__Bacteria:p__Proteobacteria:c__Gammaproteobacteria:o__Xanthomonadales:f__Xanthomonadaceae:g__                        |
| MID4 | denovo61  | 1  | k__Bacteria:p__Actinobacteria:c__Actinobacteria:o__Actinomycetales:f__Actinomycetaceae:g__Actinomyces                  |
| MID4 | denovo610 | 3  | k__Bacteria:p__Proteobacteria:c__Alphaproteobacteria:o__Sphingomonadales:f__Sphingomonadaceae:g__Sphingomonas          |
| MID4 | denovo613 | 1  | k__Bacteria:p__Proteobacteria:c__Alphaproteobacteria:o__Sphingomonadales:f__Sphingomonadaceae:g__Sphingomonas          |
| MID4 | denovo616 | 1  | k__Bacteria:p__Proteobacteria:c__Alphaproteobacteria:o__Rhizobiales:f__Phyllobacteriaceae                              |
| MID4 | denovo618 | 4  | k__Bacteria:p__Proteobacteria:c__Alphaproteobacteria:o__Rhizobiales:f__Hyphomicrobiaceae:g__Rhodoplanes                |
| MID4 | denovo620 | 1  | k__Bacteria:p__Actinobacteria:c__Actinobacteria:o__Actinomycetales:f__Dermabacteraceae:g__Dermabacter                  |
| MID4 | denovo621 | 1  | k__Bacteria:p__Proteobacteria:c__Alphaproteobacteria:o__Caulobacteriales:f__Caulobacteraceae:g__                       |
| MID4 | denovo624 | 1  | k__Bacteria:p__Proteobacteria:c__Gammaproteobacteria:o__Xanthomonadales:f__Xanthomonadaceae:g__                        |
| MID4 | denovo63  | 10 | k__Bacteria:p__Firmicutes:c__Bacilli:o__Lactobacillales:f__Lactobacillaceae:g__Lactobacillus                           |
| MID4 | denovo631 | 4  | k__Bacteria:p__Firmicutes:c__Clostridia:o__Clostridiales:f__g__                                                        |
| MID4 | denovo639 | 1  | k__Bacteria:p__Actinobacteria:c__Actinobacteria:o__Actinomycetales:f__Geodermatophilaceae:g__Modestobacter             |
| MID4 | denovo64  | 2  | k__Bacteria:p__Proteobacteria:c__Betaproteobacteria:o__Burkholderiales:f__Comamonadaceae                               |
| MID4 | denovo640 | 1  | k__Bacteria:p__Firmicutes:c__Clostridia:o__Clostridiales:f__Ruminococcaceae:g__                                        |
| MID4 | denovo648 | 2  | k__Bacteria:p__Proteobacteria:c__Alphaproteobacteria:o__Rhizobiales:f__Aurantimonadaceae:g__                           |
| MID4 | denovo651 | 1  | k__Bacteria:p__Firmicutes:c__Bacilli:o__Lactobacillales:f__Aerococcaceae:g__Alloiococcus                               |
| MID4 | denovo654 | 2  | k__Bacteria:p__Proteobacteria:c__Betaproteobacteria:o__Burkholderiales                                                 |
| MID4 | denovo655 | 91 | k__Bacteria:p__Firmicutes:c__Clostridia:o__Clostridiales:f__[Tissierellaceae]:g__Anaerococcus                          |
| MID4 | denovo656 | 1  | k__Bacteria:p__Chlorobi:c__Ignavibacteria:o__Ignavibacteriales:f__Ignavibacteriaceae:g__                               |
| MID4 | denovo657 | 2  | k__Bacteria:p__Proteobacteria:c__Alphaproteobacteria:o__Rhodospirillales:f__Acetobacteraceae:g__                       |
| MID4 | denovo658 | 2  | k__Bacteria:p__Actinobacteria:c__Actinobacteria:o__Actinomycetales:f__Pseudonocardiaceae:g__Pseudonocardia             |
| MID4 | denovo661 | 2  | k__Bacteria:p__Actinobacteria:c__Actinobacteria:o__Actinomycetales:f__g__                                              |
| MID4 | denovo662 | 7  | k__Bacteria:p__Bacteroidetes:c__Bacteroidia:o__Bacteroidales:f__Prevotellaceae:g__Prevotella                           |
| MID4 | denovo664 | 1  | k__Bacteria:p__Cyanobacteria:c__Oscillatoriophyceae:o__Chroococcales:f__Xenococcaceae:g__                              |
| MID4 | denovo666 | 3  | k__Bacteria:p__Firmicutes:c__Bacilli:o__Lactobacillales:f__Aerococcaceae:g__Aerococcus                                 |
| MID4 | denovo667 | 1  | k__Bacteria:p__Actinobacteria:c__Thermoleophila:o__Solirubrobacteriales:f__g__                                         |
| MID4 | denovo668 | 2  | k__Bacteria:p__Proteobacteria:c__Betaproteobacteria:o__Neisseriales:f__Neisseriaceae:g__Neisseria                      |
| MID4 | denovo669 | 1  | k__Bacteria:p__Firmicutes:c__Clostridia:o__Clostridiales:f__Ruminococcaceae:g__Ethanoligenens                          |
| MID4 | denovo67  | 1  | Unassigned                                                                                                             |
| MID4 | denovo673 | 1  | k__Bacteria:p__WPS-2:c__o__f__g__                                                                                      |
| MID4 | denovo675 | 1  | k__Bacteria:p__Bacteroidetes:c__Cytophagia:o__Cytophagales:f__Cytophagaceae:g__Spirosoma                               |
| MID4 | denovo678 | 1  | k__Bacteria:p__Firmicutes:c__Clostridia:o__Clostridiales:f__[Tissierellaceae]:g__Peptoniphilus                         |
| MID4 | denovo679 | 2  | k__Bacteria:p__Firmicutes:c__Bacilli:o__Bacillales:f__Bacillaceae:g__Bacillus                                          |
| MID4 | denovo688 | 1  | k__Bacteria:p__Actinobacteria:c__Thermoleophila:o__Gaiellales:f__Gaiellaceae:g__                                       |
| MID4 | denovo693 | 1  | k__Bacteria:p__Proteobacteria:c__Alphaproteobacteria:o__Caulobacteriales:f__Caulobacteraceae:g__                       |
| MID4 | denovo694 | 1  | k__Bacteria:p__Actinobacteria:c__Actinobacteria:o__Actinomycetales:f__Mycobacteriaceae:g__Mycobacterium                |
| MID4 | denovo696 | 4  | k__Bacteria:p__Actinobacteria:c__Actinobacteria:o__Actinomycetales:f__Propionibacteriaceae:g__Propionibacterium        |
| MID4 | denovo698 | 3  | k__Bacteria:p__Bacteroidetes:c__Bacteroidia:o__Bacteroidales:f__[Paraprevotellaceae]:g__CF231                          |
| MID4 | denovo699 | 16 | k__Bacteria:p__Proteobacteria:c__Alphaproteobacteria:o__Rhodospirillales:f__Acetobacteraceae:g__                       |
| MID4 | denovo70  | 7  | k__Bacteria:p__Cyanobacteria:c__Nostocophycideae:o__Nostocales:f__Nostocaceae:g__Cylindrospermopsis                    |
| MID4 | denovo701 | 2  | k__Bacteria:p__Proteobacteria:c__Alphaproteobacteria:o__Rhodospirillales:f__Acetobacteraceae:g__Roseomonas             |
| MID4 | denovo703 | 1  | k__Bacteria:p__Firmicutes:c__Bacilli:o__Bacillales:f__Staphylococcaceae:g__Macrococcus                                 |
| MID4 | denovo706 | 1  | k__Bacteria:p__Firmicutes:c__Clostridia:o__Clostridiales:f__Clostridiaceae:g__Clostridium                              |
| MID4 | denovo709 | 7  | k__Bacteria:p__Proteobacteria:c__Gammaproteobacteria:o__Pseudomonadales:f__Moraxellaceae:g__Enhydrobacter              |
| MID4 | denovo71  | 1  | k__Bacteria:p__Proteobacteria:c__Alphaproteobacteria:o__Rhizobiales:f__Hyphomicrobiaceae:g__Devosia                    |
| MID4 | denovo713 | 1  | k__Bacteria:p__Bacteroidetes:c__Sphingobacteriia:o__Sphingobacteriales:f__Sphingobacteriaceae:g__Sphingobacterium      |
| MID4 | denovo714 | 1  | k__Bacteria:p__Proteobacteria:c__Alphaproteobacteria:o__Sphingomonadales:f__Erythrobacteraceae:g__                     |
| MID4 | denovo715 | 2  | k__Bacteria:p__Firmicutes:c__Clostridia:o__Clostridiales:f__[Tissierellaceae]:g__Peptoniphilus                         |
| MID4 | denovo716 | 1  | k__Bacteria:p__Bacteroidetes:c__Cytophagia:o__Cytophagales:f__Cytophagaceae:g__Hymenobacter                            |
| MID4 | denovo719 | 1  | k__Bacteria:p__Firmicutes:c__Clostridia:o__Clostridiales:f__g__                                                        |
| MID4 | denovo723 | 1  | k__Bacteria:p__Bacteroidetes:c__Cytophagia:o__Cytophagales:f__Cytophagaceae:g__Hymenobacter                            |
| MID4 | denovo724 | 1  | k__Bacteria:p__Acidobacteria:c__Solibacteres:o__Solibacteriales:f__g__                                                 |
| MID4 | denovo725 | 4  | k__Bacteria:p__Proteobacteria:c__Gammaproteobacteria:o__Enterobacteriales:f__Enterobacteriaceae:g__Erwinia             |
| MID4 | denovo728 | 2  | k__Bacteria:p__Planctomycetes:c__Planctomycetia:o__Gemmatales:f__Isosphaeraceae:g__                                    |
| MID4 | denovo73  | 1  | k__Bacteria:p__FBP:c__o__f__g__                                                                                        |
| MID4 | denovo732 | 1  | k__Bacteria:p__Bacteroidetes:c__Cytophagia:o__Cytophagales:f__Cytophagaceae:g__                                        |
| MID4 | denovo734 | 1  | k__Bacteria:p__Proteobacteria:c__Betaproteobacteria:o__Neisseriales:f__Neisseriaceae:g__Neisseria                      |
| MID4 | denovo736 | 1  | k__Bacteria:p__Firmicutes:c__Clostridia:o__Clostridiales:f__[Tissierellaceae]:g__Parvimonas                            |
| MID4 | denovo739 | 1  | k__Bacteria:p__Cyanobacteria:c__Synechococcophycideae:o__Pseudanabaenales:f__Pseudanabaenaceae:g__Leptolyngbya         |
| MID4 | denovo74  | 11 | k__Bacteria:p__Actinobacteria:c__Actinobacteria:o__Actinomycetales:f__Corynebacteriaceae:g__Corynebacterium            |
| MID4 | denovo740 | 3  | k__Bacteria:p__Firmicutes:c__Clostridia:o__Clostridiales:f__Lachnospiraceae:g__                                        |
| MID4 | denovo742 | 1  | k__Bacteria:p__Actinobacteria:c__Actinobacteria:o__Actinomycetales:f__Frankiaceae:g__                                  |
| MID4 | denovo746 | 19 | k__Bacteria:p__Proteobacteria:c__Gammaproteobacteria:o__Enterobacteriales:f__Enterobacteriaceae:g__Candidatus_Regiella |
| MID4 | denovo747 | 1  | k__Bacteria:p__Proteobacteria:c__Alphaproteobacteria:o__Sphingomonadales:f__Sphingomonadaceae:g__                      |
| MID4 | denovo748 | 4  | k__Bacteria:p__Proteobacteria:c__Gammaproteobacteria:o__Xanthomonadales:f__Xanthomonadaceae:g__Lysobacter              |
| MID4 | denovo749 | 1  | k__Bacteria:p__Firmicutes:c__Clostridia:o__Clostridiales:f__g__                                                        |

|      |           |    |                                                                                                                 |
|------|-----------|----|-----------------------------------------------------------------------------------------------------------------|
| MID4 | denovo750 | 1  | k__Bacteria:p__Bacteroidetes:c__Bacteroidia:o__Bacteroidales:f__Bacteroidaceae:g__Bacteroides                   |
| MID4 | denovo752 | 1  | k__Bacteria:p__Proteobacteria:c__Alphaproteobacteria:o__Sphingomonadales:f__Sphingomonadaceae:g__               |
| MID4 | denovo76  | 1  | k__Bacteria:p__Chloroflexi:c__Ellin6529:o__f__g__                                                               |
| MID4 | denovo763 | 1  | k__Bacteria:p__Actinobacteria:c__Thermoleophilla:o__Gaiellales:f__Gaiellaceae:g__                               |
| MID4 | denovo766 | 2  | k__Bacteria:p__Actinobacteria:c__Actinobacteria:o__Actinomycetales:f__Microbacteriaceae:g__Agrococcus           |
| MID4 | denovo767 | 1  | k__Bacteria:p__Proteobacteria:c__Betaproteobacteria:o__Methylophilales:f__Methylophilaceae:g__Methylothermus    |
| MID4 | denovo769 | 1  | k__Bacteria:p__Acidobacteria:c__Acidobacteria-6:o__iii1-15:f__mb2424:g__                                        |
| MID4 | denovo770 | 50 | k__Bacteria:p__Cyanobacteria:c__Oscillatoriothrix:f__Chroococcales:f__Xenococcaceae:g__                         |
| MID4 | denovo771 | 1  | k__Bacteria:p__Armatimonadetes:c__Armatimonadetes:o__Armatimonadales:f__Armatimonadaceae:g__                    |
| MID4 | denovo776 | 4  | k__Bacteria:p__Firmicutes:c__Clostridia:o__Clostridiales:f__Ruminococcaceae:g__                                 |
| MID4 | denovo777 | 4  | k__Bacteria:p__Firmicutes:c__Clostridia:o__Clostridiales:f__Ruminococcaceae:g__                                 |
| MID4 | denovo783 | 1  | k__Bacteria:p__Cyanobacteria:c__Oscillatoriothrix:f__Oscillatoriales:f__Phormidiaceae:g__Phormidium             |
| MID4 | denovo786 | 3  | k__Bacteria:p__Firmicutes:c__Clostridia:o__Clostridiales                                                        |
| MID4 | denovo79  | 32 | k__Bacteria:p__Firmicutes:c__Clostridia:o__Clostridiales:f__[Tissierellaceae]:g__Anaerococcus                   |
| MID4 | denovo790 | 1  | k__Bacteria:p__Cyanobacteria:c__Chloroplast:o__Streptophyta:f__g__                                              |
| MID4 | denovo796 | 2  | k__Bacteria:p__Proteobacteria:c__Alphaproteobacteria:o__Rhodobacterales:f__Rhodobacteraceae:g__Rubellimicrobium |
| MID4 | denovo799 | 3  | k__Bacteria:p__Firmicutes:c__Clostridia:o__Clostridiales:f__Lachnospiraceae:g__Coprococcus                      |
| MID4 | denovo801 | 2  | k__Bacteria:p__Proteobacteria:c__Alphaproteobacteria:o__Rhodobacterales:f__Rhodobacteraceae:g__Rubellimicrobium |
| MID4 | denovo803 | 2  | k__Bacteria:p__Actinobacteria:c__Actinobacteria:o__Actinomycetales:f__Sporichthyaceae:g__                       |
| MID4 | denovo806 | 1  | k__Bacteria:p__Firmicutes:c__Bacilli:o__Bacillales:f__Bacillaceae:g__Bacillus                                   |
| MID4 | denovo807 | 5  | k__Bacteria:p__Firmicutes:c__Clostridia:o__Clostridiales:f__Lachnospiraceae:g__                                 |
| MID4 | denovo809 | 2  | k__Bacteria:p__Planctomycetes:c__Planctomycetia:o__Planctomycetales:f__Planctomycetaceae:g__Planctomyces        |
| MID4 | denovo81  | 1  | k__Bacteria:p__Acidobacteria:c__Acidobacteria-6:o__iii1-15:f__g__                                               |
| MID4 | denovo816 | 2  | k__Bacteria:p__Firmicutes:c__Bacilli:o__Lactobacillales:f__Carnobacteriaceae:g__Desemzia                        |
| MID4 | denovo818 | 2  | k__Bacteria:p__Proteobacteria:c__Alphaproteobacteria:o__Rhodobacterales:f__Rhodobacteraceae:g__Rubellimicrobium |
| MID4 | denovo820 | 1  | k__Bacteria:p__Proteobacteria:c__Gammaproteobacteria:o__Xanthomonadales:f__Xanthomonadaceae:g__                 |
| MID4 | denovo821 | 6  | k__Bacteria:p__Proteobacteria:c__Alphaproteobacteria:o__Rhizobiales:f__Methylocystaceae:g__                     |
| MID4 | denovo822 | 2  | k__Bacteria:p__Proteobacteria:c__Alphaproteobacteria:o__Rhodobacterales:f__Rhodobacteraceae:g__                 |
| MID4 | denovo823 | 1  | k__Bacteria:p__Firmicutes:c__Clostridia:o__Clostridiales:f__Clostridiaceae:g__Clostridium                       |
| MID4 | denovo825 | 1  | k__Bacteria:p__Planctomycetes:c__Planctomycetia:o__Pirellulales:f__Pirellulaceae:g__                            |
| MID4 | denovo826 | 1  | k__Bacteria:p__Proteobacteria:c__Gammaproteobacteria:o__Pseudomonadales:f__Pseudomonadaceae:g__Pseudomonas      |
| MID4 | denovo829 | 10 | k__Bacteria:p__Firmicutes:c__Bacilli:o__Lactobacillales:f__Carnobacteriaceae:g__Carnobacterium                  |
| MID4 | denovo834 | 3  | k__Bacteria:p__Proteobacteria:c__Alphaproteobacteria:o__Sphingomonadales:f__Sphingomonadaceae:g__Sphingomonas   |
| MID4 | denovo836 | 6  | k__Bacteria:p__Cyanobacteria:c__Oscillatoriothrix:f__Chroococcales:f__Xenococcaceae                             |
| MID4 | denovo839 | 1  | k__Bacteria:p__Firmicutes:c__Clostridia:o__Clostridiales:f__[Tissierellaceae]:g__Peptoniphilus                  |
| MID4 | denovo84  | 2  | k__Bacteria:p__Firmicutes:c__Bacilli:o__Lactobacillales:f__Aerococcaceae:g__Alloiooccus                         |
| MID4 | denovo841 | 1  | k__Bacteria:p__Proteobacteria:c__Alphaproteobacteria:o__Rhizobiales:f__g__                                      |
| MID4 | denovo843 | 1  | k__Bacteria:p__Proteobacteria:c__Alphaproteobacteria:o__Rhizobiales:f__Xanthobacteraceae:g__Labrys              |
| MID4 | denovo844 | 1  | k__Bacteria:p__Proteobacteria:c__Betaproteobacteria:o__Burkholderiales:f__Comamonadaceae:g__                    |
| MID4 | denovo848 | 3  | k__Bacteria:p__Cyanobacteria:c__4C0d-2:o__SM2F09:f__g__                                                         |
| MID4 | denovo850 | 1  | k__Bacteria:p__Cyanobacteria:c__Oscillatoriothrix:f__Oscillatoriales:f__Phormidiaceae:g__Phormidium             |
| MID4 | denovo853 | 12 | k__Bacteria:p__Proteobacteria:c__Betaproteobacteria:o__Burkholderiales:f__g__                                   |
| MID4 | denovo854 | 1  | k__Bacteria:p__Cyanobacteria:c__Oscillatoriothrix:f__Chroococcales:f__Xenococcaceae:g__                         |
| MID4 | denovo856 | 1  | k__Bacteria:p__Firmicutes:c__Clostridia:o__Clostridiales:f__[Tissierellaceae]:g__ph2                            |
| MID4 | denovo857 | 1  | k__Bacteria:p__Proteobacteria:c__Gammaproteobacteria:o__Xanthomonadales:f__Sinobacteraceae:g__                  |
| MID4 | denovo862 | 4  | k__Bacteria:p__FBP:c__o__f__g__                                                                                 |
| MID4 | denovo867 | 1  | k__Bacteria:p__Proteobacteria:c__Alphaproteobacteria:o__Sphingomonadales:f__Sphingomonadaceae:g__               |
| MID4 | denovo868 | 4  | k__Bacteria:p__Firmicutes:c__Clostridia:o__Clostridiales:f__[Tissierellaceae]:g__Anaerococcus                   |
| MID4 | denovo870 | 2  | k__Bacteria:p__Proteobacteria:c__Gammaproteobacteria:o__Pseudomonadales:f__Pseudomonadaceae:g__Pseudomonas      |
| MID4 | denovo872 | 1  | k__Bacteria:p__Acidobacteria:c__iii1-8:o__32-20:f__g__                                                          |
| MID4 | denovo873 | 2  | k__Bacteria:p__Cyanobacteria:c__Synechococcophycideae:o__Pseudanabaenales:f__Pseudanabaenaceae:g__              |
| MID4 | denovo874 | 1  | k__Bacteria:p__Proteobacteria:c__Alphaproteobacteria:o__Rhodobacterales:f__Rhodobacteraceae:g__Amaricoccus      |
| MID4 | denovo878 | 4  | k__Bacteria:p__Firmicutes:c__Bacilli:o__Lactobacillales:f__Streptococcaceae:g__Streptococcus                    |
| MID4 | denovo88  | 2  | k__Bacteria:p__Cyanobacteria:c__Synechococcophycideae:o__Pseudanabaenales:f__Pseudanabaenaceae:g__Leptolyngbya  |
| MID4 | denovo880 | 22 | k__Bacteria:p__Firmicutes:c__Clostridia:o__Clostridiales:f__Ruminococcaceae:g__Ruminococcus                     |
| MID4 | denovo882 | 2  | k__Bacteria:p__Cyanobacteria:c__Synechococcophycideae:o__Pseudanabaenales:f__Pseudanabaenaceae:g__Leptolyngbya  |
| MID4 | denovo885 | 11 | k__Bacteria:p__Firmicutes:c__Clostridia:o__Clostridiales:f__Ruminococcaceae:g__                                 |
| MID4 | denovo886 | 3  | k__Bacteria:p__Firmicutes:c__Clostridia:o__Clostridiales:f__[Tissierellaceae]:g__Peptoniphilus                  |
| MID4 | denovo889 | 5  | k__Bacteria:p__Firmicutes:c__Clostridia:o__Clostridiales:f__Veillonellaceae:g__Megasphaera                      |
| MID4 | denovo89  | 1  | k__Bacteria:p__Firmicutes:c__Clostridia:o__Clostridiales:f__Lachnospiraceae:g__Coprococcus                      |
| MID4 | denovo890 | 1  | k__Bacteria:p__Bacteroidetes:c__[Rhodothermi]:o__[Rhodothermales]:f__Rhodothermaceae:g__                        |
| MID4 | denovo896 | 9  | k__Bacteria:p__Bacteroidetes:c__Bacteroidia:o__Bacteroidales:f__Prevotellaceae:g__Prevotella                    |
| MID4 | denovo897 | 16 | k__Bacteria:p__Actinobacteria:c__Actinobacteria:o__Actinomycetales:f__Corynebacteriaceae:g__Corynebacterium     |
| MID4 | denovo902 | 6  | k__Bacteria:p__Cyanobacteria:c__Oscillatoriothrix:f__Chroococcales:f__Xenococcaceae:g__                         |
| MID4 | denovo905 | 1  | k__Bacteria:p__Acidobacteria:c__Acidobacteria-6:o__iii1-15:f__mb2424:g__                                        |
| MID4 | denovo91  | 1  | k__Bacteria:p__Proteobacteria:c__Alphaproteobacteria:o__Caulobacterales:f__Caulobacteraceae:g__Brevundimonas    |
| MID4 | denovo918 | 3  | k__Bacteria:p__Actinobacteria:c__Actinobacteria:o__Actinomycetales:f__Microbacteriaceae:g__Rathayibacter        |

|      |           |    |                                                                                                                 |
|------|-----------|----|-----------------------------------------------------------------------------------------------------------------|
| MID4 | denovo922 | 1  | k__Bacteria:p__Proteobacteria:c__Alphaproteobacteria:o__Rhizobiales:f__Bradyrhizobiaceae                        |
| MID4 | denovo923 | 1  | k__Bacteria:p__Firmicutes:c__Clostridia:o__Clostridiales:f__Ruminococcaceae:g__                                 |
| MID4 | denovo925 | 1  | k__Bacteria:p__Firmicutes:c__Bacilli:o__Bacillales:f__Paenibacillaceae:g__Paenibacillus                         |
| MID4 | denovo926 | 1  | k__Bacteria:p__Armatimonadetes:c__Chthonomonadetes:o__Chthonomonadales:f__Chthonomonadaceae:g__                 |
| MID4 | denovo928 | 11 | k__Bacteria:p__Proteobacteria:c__Alphaproteobacteria:o__Rhodospirillales:f__Acetobacteraceae:g__                |
| MID4 | denovo930 | 2  | k__Bacteria:p__Proteobacteria:c__Alphaproteobacteria:o__Rhodospirillales:f__Acetobacteraceae:g__                |
| MID4 | denovo933 | 1  | k__Bacteria:p__Firmicutes:c__Bacilli:o__Bacillales:f__Paenibacillaceae:g__Paenibacillus                         |
| MID4 | denovo934 | 1  | k__Bacteria:p__Proteobacteria:c__Alphaproteobacteria:o__Rhodobacterales:f__Rhodobacteraceae:g__Rhodobacter      |
| MID4 | denovo935 | 1  | k__Bacteria:p__Proteobacteria:c__Gammaproteobacteria:o__Xanthomonadales:f__Xanthomonadaceae:g__Thermomonas      |
| MID4 | denovo937 | 2  | k__Bacteria:p__Actinobacteria:c__Actinobacteria:o__Actinomycetales:f__Brevibacteriaceae:g__Brevibacterium       |
| MID4 | denovo938 | 5  | k__Bacteria:p__Actinobacteria:c__Actinobacteria:o__Actinomycetales:f__Brevibacteriaceae:g__Brevibacterium       |
| MID4 | denovo943 | 1  | k__Bacteria:p__Proteobacteria:c__Alphaproteobacteria:o__Rhodospirillales:f__Rhodospirillaceae:g__               |
| MID4 | denovo947 | 3  | k__Bacteria:p__Firmicutes:c__Clostridia:o__Clostridiales:f__Ruminococcaceae:g__                                 |
| MID4 | denovo95  | 2  | k__Bacteria:p__Bacteroidetes:c__Flavobacteriia:o__Flavobacteriales:f__[Weeksellaceae]:g__Chryseobacterium       |
| MID4 | denovo950 | 1  | k__Bacteria:p__Proteobacteria:c__Alphaproteobacteria:o__Rhodobacterales:f__Rhodobacteraceae:g__Rubellimicrobium |
| MID4 | denovo953 | 8  | k__Bacteria:p__Actinobacteria:c__Actinobacteria:o__Actinomycetales:f__Microbacteriaceae:g__Curtobacterium       |
| MID4 | denovo955 | 1  | k__Bacteria:p__Proteobacteria:c__Alphaproteobacteria:o__Rhizobiales:f__Methylobacteriaceae:g__Methylobacterium  |
| MID4 | denovo96  | 12 | k__Bacteria:p__Firmicutes:c__Clostridia:o__Clostridiales:f__[Tissierellaceae]:g__Anaerococcus                   |
| MID4 | denovo963 | 3  | k__Bacteria:p__Proteobacteria:c__Alphaproteobacteria:o__Sphingomonadales:f__Sphingomonadaceae:g__               |
| MID4 | denovo964 | 2  | k__Bacteria:p__Proteobacteria:c__Gammaproteobacteria:o__Pseudomonadales:f__Moraxellaceae:g__Acinetobacter       |
| MID4 | denovo965 | 2  | k__Bacteria:p__Firmicutes:c__Bacilli:o__Lactobacillales:f__Aerococcaceae:g__Facklamia                           |
| MID4 | denovo967 | 1  | k__Bacteria:p__Gemmatimonadetes:c__Gemmatimonadetes:o__Gemmatimonadales:f__g__                                  |
| MID4 | denovo97  | 1  | k__Bacteria:p__Gemmatimonadetes:c__Gemm-3:o__f__g__                                                             |
| MID4 | denovo973 | 7  | k__Bacteria:p__Firmicutes:c__Bacilli:o__Bacillales:f__Staphylococcaceae:g__Jeotgalicoccus                       |
| MID4 | denovo981 | 2  | k__Bacteria:p__Firmicutes:c__Bacilli:o__Lactobacillales:f__Leuconostocaceae:g__                                 |
| MID4 | denovo983 | 1  | k__Bacteria:p__Proteobacteria:c__Betaproteobacteria:o__Burkholderiales:f__Burkholderiaceae:g__Burkholderia      |
| MID4 | denovo991 | 1  | k__Bacteria:p__Proteobacteria:c__Alphaproteobacteria:o__Rhizobiales:f__Phyllobacteriaceae:g__Mesorhizobium      |
| MID4 | denovo997 | 1  | k__Bacteria:p__Proteobacteria:c__Alphaproteobacteria:o__Sphingomonadales:f__Erythrobacteraceae:g__              |

Table S10.1. real node table for rOTU network (based on PhyloChip data) and visualization in Cytoscape

| node_name | degree | weighted_degree | shared    | genus&species            |
|-----------|--------|-----------------|-----------|--------------------------|
| 134       | 1      | 11756           | CR8       | Pseudomonas              |
| 158       | 1      | 12369           | CR8       | Pseudomonas              |
| 160       | 2      | 23826           | CR8,CR5   | Pseudomonas              |
| 182       | 1      | 11718           | CR8       | Pseudomonas              |
| 339       | 1      | 11707           | UR        | Pseudomonas              |
| 421       | 1      | 11633           | UR        | Pseudomonas              |
| 507       | 3      | 35998           | CO,UR,CR5 | Pseudomonas              |
| 508       | 1      | 11912           | CR8       | Pseudomonas              |
| 841       | 1      | 11549           | CR8       | Pseudomonas              |
| 1007      | 1      | 12220           | CR8       | Pseudomonas              |
| 1095      | 3      | 38096           | CO,UR,CR5 | Pseudomonas              |
| 1193      | 1      | 11637           | CR5       | Pseudomonas              |
| 1257      | 1      | 11740           | CR8       | Pseudomonas              |
| 1277      | 1      | 12278           | CR8       | Pseudomonas              |
| 1302      | 1      | 12212           | CR8       | Pseudomonas              |
| 1331      | 1      | 11775           | UR        | Pseudomonas              |
| 1440      | 2      | 23968           | UR,CR5    | Pseudomonas              |
| 1444      | 1      | 11758           | CR8       | Pseudomonas              |
| 1481      | 3      | 35976           | CO,UR,CR8 | Pseudomonas              |
| 1566      | 1      | 11458           | UR        | Pseudomonas              |
| 1567      | 1      | 12909           | CR8       | Pseudomonas              |
| 1638      | 3      | 35114           | CO,UR,CR5 | Pseudomonas              |
| 1650      | 1      | 12284           | UR        | Pseudomonas              |
| 1738      | 1      | 11618           | CR8       | Pseudomonas              |
| 1796      | 1      | 11889           | CR8       | Pseudomonas              |
| 1844      | 1      | 12972           | CR8       | Pseudomonas              |
| 1884      | 1      | 12643           | CR8       | Pseudomonas              |
| 1891      | 1      | 12019           | CR8       | Pseudomonas              |
| 2022      | 1      | 11733           | CR8       |                          |
| 2058      | 1      | 11686           | CR5       | Pseudomonas              |
| 2281      | 2      | 24298           | CR8,CR5   | Pseudomonas stutzeri     |
| 3351      | 1      | 13676           | UR        | Acinetobacter johnsonii  |
| 3360      | 1      | 13234           | UR        | Acinetobacter johnsonii  |
| 3369      | 2      | 26649           | CR8,CR5   | Acinetobacter lwoffii    |
| 3464      | 1      | 13020           | UR        | Acinetobacter johnsonii  |
| 3482      | 1      | 13627           | UR        | Acinetobacter johnsonii  |
| 3494      | 1      | 12242           | CR5       | Acinetobacter lwoffii    |
| 3571      | 1      | 13256           | UR        | Acinetobacter johnsonii  |
| 3624      | 1      | 13699           | UR        | Acinetobacter johnsonii  |
| 3647      | 1      | 11952           | UR        | Acinetobacter schindleri |
| 3672      | 1      | 13279           | UR        | Acinetobacter johnsonii  |
| 3719      | 2      | 23525           | CR8,CR5   | Pseudomonas              |
| 3736      | 2      | 23242           | CR8,CR5   | Pseudomonas              |
| 3746      | 1      | 13481           | UR        | Acinetobacter johnsonii  |
| 3752      | 1      | 12865           | UR        | Acinetobacter            |
| 3771      | 1      | 12595           | UR        | Acinetobacter            |

|      |   |       |                |                          |
|------|---|-------|----------------|--------------------------|
| 3774 | 1 | 11859 | CR5            | Acinetobacter johnsonii  |
| 3796 | 1 | 12346 | UR             | Acinetobacter schindleri |
| 3871 | 1 | 13515 | UR             | Acinetobacter johnsonii  |
| 3925 | 3 | 37477 | CO,UR,CR5      | Pseudomonas mendocina    |
| 4011 | 1 | 11886 | CR5            | Kangiella                |
| 4039 | 1 | 13741 | UR             | Acinetobacter johnsonii  |
| 4055 | 1 | 13401 | UR             | Acinetobacter johnsonii  |
| 4078 | 1 | 12716 | UR             | Acinetobacter johnsonii  |
| 4093 | 2 | 24833 | UR,CR5         | Acinetobacter johnsonii  |
| 4102 | 1 | 13526 | UR             | Acinetobacter johnsonii  |
| 4273 | 1 | 12884 | UR             |                          |
| 4421 | 1 | 11876 | CR5            |                          |
| 4467 | 1 | 11825 | CR5            |                          |
| 4497 | 1 | 11830 | CR5            |                          |
| 4998 | 1 | 11749 | CR5            | Klebsiella               |
| 5272 | 2 | 24197 | CR8,CR5        |                          |
| 5538 | 4 | 52738 | CO,UR,CR8,CR5  |                          |
| 5687 | 1 | 11624 | CR8            | Pantoea                  |
| 6094 | 1 | 11888 | CR8            | Pantoea                  |
| 6129 | 1 | 12462 | CR5            | Pantoea                  |
| 6203 | 1 | 11896 | CR5            | Citrobacter              |
| 6211 | 1 | 12825 | CR5            |                          |
| 7636 | 1 | 12962 | CR8            |                          |
| 7682 | 2 | 25893 | CO_PMA,CR8_PMA |                          |
| 7690 | 1 | 11898 | CR8_PMA        | Diaphorobacter           |
| 7833 | 1 | 12497 | CR8            | Variovorax paradoxus     |
| 7871 | 2 | 25114 | UR,CR8         | Diaphorobacter           |
| 7899 | 1 | 1     | CO_PMA         |                          |
| 7917 | 1 | 12216 | CO             |                          |
| 8038 | 1 | 12896 | CR8            | Diaphorobacter           |
| 8070 | 2 | 25100 | CR8,CR5_PMA    | Diaphorobacter           |
| 8071 | 2 | 27034 | CR8,CR5        | Diaphorobacter           |
| 8086 | 1 | 13833 | CO_PMA         | Diaphorobacter           |
| 8217 | 2 | 25228 | CO_PMA,CR8_PMA | Diaphorobacter           |
| 8247 | 1 | 13453 | CR8            | Diaphorobacter           |
| 8249 | 1 | 12712 | UR             | Diaphorobacter           |
| 8300 | 3 | 39444 | CO,UR,CR5      | Diaphorobacter           |
| 8316 | 1 | 12351 | CR8            | Diaphorobacter           |
| 8368 | 1 | 12049 | UR             |                          |
| 8385 | 1 | 13005 | CO_PMA         | Diaphorobacter           |
| 8437 | 1 | 12023 | CR8            | Diaphorobacter           |
| 8529 | 1 | 12536 | CR8            | Diaphorobacter           |
| 8546 | 2 | 24494 | CR8,CR5_PMA    | Diaphorobacter           |
| 8593 | 1 | 11565 | CR8            | Diaphorobacter           |
| 8663 | 2 | 23753 | CO,CR8         | Diaphorobacter           |
| 8808 | 2 | 23506 | UR,CR8         | Delftia                  |
| 8842 | 1 | 11984 | CR8            | Diaphorobacter           |
| 8845 | 1 | 11981 | CO_PMA         | Diaphorobacter           |
| 8961 | 1 | 1     | CR5_PMA        |                          |
| 8983 | 2 | 24910 | UR,CR8         | Diaphorobacter           |

|       |   |       |                                      |                            |
|-------|---|-------|--------------------------------------|----------------------------|
| 9071  | 2 | 24666 | CO_PMA,CR8_PMA                       |                            |
| 9082  | 2 | 25087 | CO_PMA,CR8_PMA                       |                            |
| 9103  | 3 | 36434 | CO,CO_PMA,CR8                        | Rhodoferax                 |
| 9140  | 1 | 12197 | CO                                   |                            |
| 9176  | 2 | 2     | CO_PMA,CR5_PMA                       |                            |
| 9182  | 1 | 12656 | CR8                                  | Diaphorobacter             |
| 9232  | 3 | 36787 | CO,UR,CR8                            | Rhodoferax                 |
| 9253  | 1 | 11752 | CR8                                  | Diaphorobacter             |
| 9359  | 1 | 12169 | CO                                   | Simplicispira              |
| 9380  | 1 | 12967 | CO                                   | Diaphorobacter             |
| 9418  | 1 | 13016 | CO                                   | Diaphorobacter             |
| 9425  | 1 | 12368 | CR8_PMA                              |                            |
| 9427  | 1 | 12207 | CR8_PMA                              | Verminephrobacter eiseniae |
| 9474  | 1 | 11626 | CR8_PMA                              | Diaphorobacter             |
| 9571  | 1 | 12984 | CR8                                  | Diaphorobacter             |
| 9579  | 1 | 11467 | CO_PMA                               | Diaphorobacter             |
| 9615  | 1 | 12633 | CR8_PMA                              | Diaphorobacter             |
| 9619  | 2 | 23215 | CO_PMA,CR8_PMA                       | Verminephrobacter eiseniae |
| 9623  | 1 | 12772 | CO                                   | Diaphorobacter             |
| 9681  | 1 | 12275 | CO                                   |                            |
| 9742  | 1 | 12943 | CO                                   | Diaphorobacter             |
| 9872  | 2 | 26180 | UR,CR5                               | Diaphorobacter             |
| 9917  | 1 | 11769 | CR8                                  | Polaromonas                |
| 9921  | 1 | 12107 | UR                                   | Rhodoferax                 |
| 9931  | 1 | 12580 | UR                                   | Diaphorobacter             |
| 9938  | 1 | 12942 | CR8                                  | Diaphorobacter             |
| 10116 | 1 | 12142 | CO                                   |                            |
| 10173 | 2 | 25155 | CO,CO_PMA                            | Diaphorobacter             |
| 10344 | 2 | 27350 | CR8,CR5_PMA                          | Variovorax paradoxus       |
| 10362 | 1 | 12653 | CR8_PMA                              |                            |
| 10400 | 2 | 24224 | CR8,CR5_PMA                          | Diaphorobacter             |
| 10409 | 1 | 12246 | CR8                                  | Diaphorobacter             |
| 10464 | 0 | 0     | COURCR8CR5CO_PMAUR_PMACR8_PMACR5_PMA |                            |
| 10596 | 1 | 12310 | CO                                   | Aquabacterium              |
| 10657 | 2 | 25385 | CO,CR8                               | Aquabacterium              |
| 10672 | 4 | 4     | CR8,CR5,CO_PMA,CR8_PMA               |                            |
| 10737 | 1 | 11758 | CO                                   | Methylibium                |
| 10744 | 4 | 52124 | CO,UR,CR8,CR5                        | Aquabacterium              |
| 10760 | 3 | 36920 | CO,UR,CR8                            | Aquabacterium              |
| 10804 | 2 | 24143 | CO_PMA,CR8_PMA                       | Aquabacterium              |
| 10851 | 1 | 12033 | CR8                                  | Aquabacterium              |
| 10870 | 4 | 50992 | CO,UR,CR8,CR5                        | Aquabacterium              |
| 10995 | 2 | 24075 | CO,UR                                | Aquabacterium              |
| 11025 | 1 | 12890 | UR                                   | Aquabacterium              |
| 11137 | 2 | 25142 | CO_PMA,CR8_PMA                       | Aquabacterium              |
| 11150 | 4 | 52387 | CO,UR,CR8,CR5                        | Aquabacterium              |
| 11204 | 2 | 27435 | CO,CR8                               | Aquabacterium              |
| 11208 | 1 | 12047 | CO                                   | Aquabacterium              |
| 11318 | 1 | 13008 | CO                                   | Aquabacterium              |
| 11490 | 1 | 12950 | CO                                   | Aquabacterium              |

|       |   |       |                                   |               |
|-------|---|-------|-----------------------------------|---------------|
| 11543 | 2 | 24445 | UR,CR8                            | Aquabacterium |
| 11612 | 1 | 12635 | CR8                               | Aquabacterium |
| 11636 | 2 | 25817 | CO,CR8                            | Aquabacterium |
| 11657 | 5 | 62261 | CO,CR8,CR5,CO_PMA,CR8_PMA         | Aquabacterium |
| 11724 | 3 | 38550 | CO,UR,CR5                         | Aquabacterium |
| 11745 | 1 | 12263 | CR8_PMA                           | Aquabacterium |
| 11757 | 1 | 13437 | CO_PMA                            | Aquabacterium |
| 11853 | 2 | 25465 | CR8_PMA,CR5_PMA                   | Aquabacterium |
| 11897 | 3 | 35916 | CO,UR,CR8                         | Aquabacterium |
| 11929 | 1 | 11737 | CO                                | Aquabacterium |
| 11964 | 1 | 13913 | CR8                               | Aquabacterium |
| 11980 | 1 | 12000 | CO                                | Aquabacterium |
| 12094 | 4 | 52288 | CO,CO_PMA,CR8_PMA,CR5_PMA         | Aquabacterium |
| 12146 | 1 | 12123 | CR8                               | Aquabacterium |
| 12175 | 2 | 24030 | CO,CR8                            | Aquabacterium |
| 12187 | 2 | 23723 | CO,CR8                            | Aquabacterium |
| 12211 | 2 | 23596 | CO,UR                             | Aquabacterium |
| 12217 | 3 | 39982 | CO,UR,CR5                         | Aquabacterium |
| 12326 | 6 | 6     | UR,CR8,CR5,CO_PMA,CR8_PMA,CR5_PMA |               |
| 12333 | 1 | 11483 | UR                                | Aquabacterium |
| 12392 | 3 | 38325 | CO,UR,CR8                         | Aquabacterium |
| 12476 | 1 | 13037 | CR8                               | Aquabacterium |
| 12529 | 2 | 2     | CO_PMA,CR5_PMA                    |               |
| 12530 | 1 | 12429 | CR8                               | Aquabacterium |
| 12654 | 1 | 12277 | CR8                               | Aquabacterium |
| 12745 | 2 | 24538 | CO,CR8                            | Aquabacterium |
| 12809 | 1 | 12727 | CR8                               | Aquabacterium |
| 12870 | 2 | 24968 | CO,CR8                            | Aquabacterium |
| 12882 | 1 | 12049 | CO                                | Aquabacterium |
| 12912 | 4 | 48528 | CO,UR,CR8,CR5                     | Aquabacterium |
| 12928 | 1 | 11758 | CO                                | Aquabacterium |
| 12934 | 1 | 11996 | CO                                | Methylibium   |
| 13088 | 1 | 11709 | CO_PMA                            | Aquabacterium |
| 13091 | 2 | 24413 | CO,UR                             | Methylibium   |
| 13092 | 2 | 23615 | CO,UR                             | Aquabacterium |
| 13093 | 1 | 11390 | CR8_PMA                           | Aquabacterium |
| 13106 | 2 | 23898 | CO,UR                             | Aquabacterium |
| 13122 | 1 | 12581 | CO                                | Methylibium   |
| 13162 | 1 | 13191 | CR8                               | Aquabacterium |
| 13274 | 3 | 37348 | CO,UR,CR8                         | Aquabacterium |
| 13362 | 1 | 11753 | CO                                | Aquabacterium |
| 13400 | 1 | 12774 | CR8                               | Aquabacterium |
| 13402 | 1 | 13124 | CR8                               | Aquabacterium |
| 13681 | 1 | 11532 | CR8                               | Aquabacterium |
| 13763 | 1 | 12079 | CR8                               | Aquabacterium |
| 13769 | 2 | 22817 | CO_PMA,CR8_PMA                    | Aquabacterium |
| 13882 | 2 | 23790 | CO,CR8                            | Aquabacterium |
| 13991 | 1 | 12708 | CR8                               | Aquabacterium |
| 14055 | 2 | 23036 | CO_PMA,CR8_PMA                    | Aquabacterium |
| 14121 | 1 | 12523 | CR8                               | Aquabacterium |

|       |   |       |                    |                        |
|-------|---|-------|--------------------|------------------------|
| 14137 | 1 | 11444 | CR8_PMA            | Aquabacterium          |
| 14183 | 1 | 12913 | CR8                | Aquabacterium          |
| 14194 | 3 | 37003 | CR8,CO_PMA,CR8_PMA | Aquabacterium          |
| 14199 | 3 | 37881 | CO,UR,CR8          | Aquabacterium          |
| 14292 | 1 | 12474 | CO                 | Aquabacterium          |
| 14477 | 2 | 25145 | UR,CR8             | Pandoraea              |
| 14545 | 4 | 48100 | UR,CR8,CR5,CO_PMA  | Pandoraea              |
| 14597 | 1 | 13266 | CR8                | Massilia timonae       |
| 14599 | 1 | 13755 | UR                 | Massilia timonae       |
| 14622 | 1 | 12390 | CO                 | Burkholderia           |
| 14633 | 1 | 11705 | UR                 | Oxalobacter            |
| 14641 | 1 | 12678 | CR8                | Massilia timonae       |
| 14678 | 1 | 11741 | UR                 | sfA                    |
| 14754 | 1 | 12870 | CR8                | Massilia timonae       |
| 14779 | 1 | 13275 | CR8                | Massilia timonae       |
| 14831 | 1 | 13172 | CO                 |                        |
| 15016 | 2 | 24065 | CO,CR8             |                        |
| 15035 | 2 | 25554 | UR,CR8             | Massilia timonae       |
| 15127 | 1 | 12926 | CO                 |                        |
| 15249 | 1 | 13637 | UR                 | Massilia timonae       |
| 15292 | 2 | 25731 | UR,CR8             | Burkholderia mallei    |
| 15342 | 2 | 26324 | UR,CR8             | Massilia timonae       |
| 15459 | 2 | 25364 | CO,CR8             |                        |
| 15495 | 1 | 12796 | UR_PMA             |                        |
| 15508 | 1 | 12327 | CR8                |                        |
| 15533 | 1 | 12038 | CR8                |                        |
| 15566 | 1 | 12049 | CR8                |                        |
| 15570 | 1 | 11656 | CR8                | Massilia timonae       |
| 15581 | 3 | 38273 | CO,UR,CR5          |                        |
| 15605 | 1 | 12317 | CR8                |                        |
| 15621 | 1 | 12073 | CO                 |                        |
| 15647 | 1 | 11763 | CR8                | Massilia timonae       |
| 15679 | 1 | 11703 | CO                 |                        |
| 15685 | 2 | 27643 | CR8,CR5            | Massilia timonae       |
| 15719 | 1 | 12076 | CO                 | Massilia timonae       |
| 15731 | 2 | 24220 | CO,CR8             |                        |
| 15831 | 2 | 23825 | CO,CR8             |                        |
| 15908 | 1 | 11656 | UR                 | Pseudoxanthomonas      |
| 15917 | 1 | 12449 | CO                 | Thermomonas            |
| 15920 | 1 | 12350 | CO                 | Rhodanobacter          |
| 15941 | 1 | 12165 | UR                 | Stenotrophomonas       |
| 15978 | 1 | 11716 | CO                 |                        |
| 15987 | 1 | 12425 | CO                 | Thermomonas            |
| 16000 | 1 | 12480 | CR8                |                        |
| 16030 | 1 | 11899 | CR5                | Lysobacter             |
| 16065 | 1 | 12179 | CO                 | Succinivibrio          |
| 16096 | 1 | 12437 | UR                 |                        |
| 16161 | 2 | 24748 | CO,UR              | Xanthomonas axonopodis |
| 16221 | 2 | 25326 | CO,CR5             | Lysobacter             |
| 16250 | 1 | 12327 | UR                 | Stenotrophomonas       |

|       |   |       |                                      |                        |
|-------|---|-------|--------------------------------------|------------------------|
| 16340 | 1 | 12229 | CO                                   | Rhodanobacter          |
| 16347 | 0 | 0     | COURCR8CR5CO_PMAUR_PMACR8_PMACR5_PMA |                        |
| 16349 | 1 | 12525 | CO                                   | Luteimonas mephitis    |
| 16376 | 1 | 12836 | CO                                   | Rhodanobacter          |
| 16384 | 4 | 50057 | CO,CO_PMA,CR8,CR5                    |                        |
| 16425 | 2 | 24591 | CO,UR                                | Xanthomonas axonopodis |
| 16495 | 2 | 24530 | CO,CR5                               | Lysobacter             |
| 16520 | 1 | 12313 | UR                                   | Pseudomonas geniculata |
| 16522 | 1 | 12324 | UR                                   | Pseudomonas geniculata |
| 16590 | 1 | 12709 | UR                                   | Pseudomonas geniculata |
| 16687 | 1 | 13050 | CO                                   | Thauera                |
| 16717 | 1 | 11539 | CR8                                  |                        |
| 16734 | 1 | 12643 | CO                                   | Lysobacter             |
| 16819 | 2 | 24195 | CO,CR5                               | Lysobacter             |
| 16847 | 2 | 24013 | CO,UR                                | Lysobacter             |
| 16916 | 2 | 24506 | CO,UR                                | Xanthomonas axonopodis |
| 16937 | 1 | 13983 | CO                                   |                        |
| 16971 | 1 | 12652 | UR                                   | Stenotrophomonas       |
| 17015 | 1 | 12326 | CR8                                  | Dyella                 |
| 17051 | 1 | 12867 | UR                                   | Comamonas              |
| 17229 | 1 | 12324 | CR5                                  | Stenotrophomonas       |
| 17322 | 1 | 12943 | UR                                   | Pseudomonas geniculata |
| 17348 | 1 | 12006 | UR                                   | Xanthomonas axonopodis |
| 17357 | 1 | 12146 | CO                                   | Rhodanobacter          |
| 17392 | 1 | 13006 | CO                                   | Dokdonella             |
| 17427 | 1 | 11815 | CR5                                  | Eubacterium rectale    |
| 17447 | 1 | 12614 | CR5                                  | Eubacterium rectale    |
| 17519 | 2 | 23725 | UR,CR8                               | Eubacterium rectale    |
| 17661 | 1 | 11996 | CR5                                  | Eubacterium rectale    |
| 17677 | 1 | 12227 | CR5                                  | Eubacterium rectale    |
| 17726 | 1 | 12282 | CR5                                  | Eubacterium rectale    |
| 17744 | 1 | 12028 | CR5                                  | Eubacterium rectale    |
| 17765 | 2 | 26914 | CR8,CR5                              | Eubacterium rectale    |
| 17792 | 1 | 11699 | CR5                                  | Eubacterium rectale    |
| 17828 | 1 | 12203 | CR5                                  | Eubacterium rectale    |
| 17852 | 2 | 23864 | CR8,CR5                              | Roseburia              |
| 17893 | 1 | 12779 | CR5                                  | Eubacterium rectale    |
| 17943 | 1 | 11766 | CR5                                  | Eubacterium rectale    |
| 17964 | 1 | 12249 | CR5                                  | Eubacterium rectale    |
| 18113 | 1 | 11847 | CR5                                  | Eubacterium rectale    |
| 18137 | 1 | 11744 | CR8                                  | Eubacterium rectale    |
| 18175 | 1 | 12365 | CR5                                  | Eubacterium rectale    |
| 18222 | 1 | 12241 | CR5                                  | Eubacterium rectale    |
| 18252 | 1 | 12119 | CR5                                  | Eubacterium rectale    |
| 18254 | 1 | 12380 | CR5                                  | Eubacterium rectale    |
| 18281 | 1 | 11633 | CR5                                  | Eubacterium rectale    |
| 18761 | 1 | 11860 | CR8                                  | Ruminococcus           |
| 19470 | 1 | 12693 | CR8                                  |                        |
| 19752 | 1 | 11891 | CO                                   | Lachnospira            |
| 20192 | 1 | 12194 | CO                                   | Coproccoccus           |

|       |   |       |           |                              |
|-------|---|-------|-----------|------------------------------|
| 20652 | 3 | 36748 | CO,UR,CR5 | Blautia                      |
| 20782 | 2 | 23805 | UR,CR8    |                              |
| 21155 | 2 | 23982 | CO,CR5    | Blautia                      |
| 22140 | 1 | 12225 | CR8       |                              |
| 22190 | 1 | 12305 | CO        |                              |
| 22993 | 1 | 12214 | CR8       | Coprococcus                  |
| 23140 | 1 | 11862 | CO        | Butyrivibrio                 |
| 23182 | 1 | 12434 | CO        | Butyrivibrio                 |
| 23349 | 1 | 12089 | CO        |                              |
| 23897 | 1 | 12552 | CO        |                              |
| 24119 | 1 | 12096 | CO        |                              |
| 24363 | 1 | 12731 | CR8       | Coprococcus                  |
| 24427 | 1 | 12205 | CR5       | Faecalibacterium             |
| 24447 | 1 | 13098 | CO        | Faecalibacterium             |
| 24455 | 1 | 11751 | CO        | Faecalibacterium             |
| 24509 | 3 | 38279 | CO,UR,CR5 | Faecalibacterium             |
| 24544 | 1 | 12347 | CR8       | Faecalibacterium             |
| 24600 | 1 | 11860 | CO        | Faecalibacterium             |
| 24602 | 2 | 24576 | CO,CR8    | Faecalibacterium prausnitzii |
| 24608 | 1 | 11753 | CO        | Faecalibacterium             |
| 24612 | 1 | 11763 | CO        |                              |
| 24646 | 1 | 11747 | CO        | Faecalibacterium             |
| 24700 | 3 | 35605 | CO,UR,CR5 | Faecalibacterium prausnitzii |
| 24841 | 2 | 23811 | CO,CR5    | Faecalibacterium prausnitzii |
| 24857 | 2 | 24271 | CO,CR5    | Faecalibacterium             |
| 24978 | 3 | 37212 | CO,UR,CR5 | Faecalibacterium             |
| 24986 | 1 | 12312 | CR8       | Faecalibacterium             |
| 24996 | 2 | 23926 | CO,CR8    | Faecalibacterium             |
| 25077 | 1 | 11714 | CR5       | Faecalibacterium prausnitzii |
| 25078 | 2 | 24021 | CO,CR8    | Faecalibacterium prausnitzii |
| 25126 | 1 | 11802 | CO        | Faecalibacterium             |
| 25139 | 3 | 37088 | CO,UR,CR5 | Faecalibacterium prausnitzii |
| 25221 | 1 | 12482 | CR8       | Faecalibacterium             |
| 25273 | 1 | 11677 | CO        | Faecalibacterium prausnitzii |
| 25288 | 1 | 12453 | CO        | Faecalibacterium prausnitzii |
| 25291 | 1 | 11832 | CO        | Faecalibacterium             |
| 25319 | 1 | 11767 | CO        | Faecalibacterium prausnitzii |
| 25325 | 1 | 11524 | CR8       | Faecalibacterium prausnitzii |
| 25341 | 2 | 26030 | CO,CR8    | Faecalibacterium             |
| 25380 | 1 | 12952 | CO        | Faecalibacterium             |
| 25425 | 2 | 24198 | UR,CR8    | Faecalibacterium prausnitzii |
| 25471 | 1 | 13159 | UR        | Faecalibacterium             |
| 25499 | 1 | 12043 | CO        | Faecalibacterium             |
| 25549 | 1 | 11785 | CO        | Faecalibacterium prausnitzii |
| 25558 | 1 | 12000 | CO        | Faecalibacterium             |
| 25604 | 1 | 11867 | CO        | Faecalibacterium             |
| 25637 | 3 | 35741 | CO,UR,CR5 | Faecalibacterium             |
| 25654 | 1 | 11727 | CR8       | Faecalibacterium             |
| 25719 | 1 | 11818 | CO        | Faecalibacterium             |
| 25759 | 1 | 11729 | CO        | Faecalibacterium prausnitzii |

|       |   |       |                                      |                              |
|-------|---|-------|--------------------------------------|------------------------------|
| 25804 | 1 | 11964 | CO                                   | Faecalibacterium prausnitzii |
| 25901 | 3 | 39502 | CO,UR,CR5                            | Faecalibacterium prausnitzii |
| 25914 | 1 | 12021 | CR5                                  | Faecalibacterium prausnitzii |
| 25950 | 2 | 23955 | CO,CR8                               | Faecalibacterium prausnitzii |
| 25994 | 2 | 24890 | CO,CR8                               | Faecalibacterium             |
| 26041 | 2 | 23567 | CO,CR8                               | Faecalibacterium             |
| 26109 | 2 | 23753 | CO,CR5                               | Faecalibacterium prausnitzii |
| 26129 | 1 | 11990 | CO                                   | Faecalibacterium             |
| 26219 | 1 | 12034 | CO                                   | Faecalibacterium prausnitzii |
| 26227 | 3 | 37286 | CO,UR,CR5                            | Faecalibacterium             |
| 26269 | 1 | 11708 | CR5                                  |                              |
| 26288 | 3 | 39653 | CO,UR,CR5                            | Faecalibacterium prausnitzii |
| 26356 | 1 | 11745 | CO                                   | Faecalibacterium             |
| 26371 | 3 | 36985 | CO,UR,CR5                            | Faecalibacterium prausnitzii |
| 26393 | 1 | 11615 | CR8                                  | Faecalibacterium prausnitzii |
| 26430 | 1 | 11954 | CO                                   | Faecalibacterium prausnitzii |
| 26462 | 2 | 25453 | CO,CR8                               | Faecalibacterium prausnitzii |
| 26514 | 1 | 11555 | CR8                                  | Faecalibacterium prausnitzii |
| 26599 | 2 | 24228 | CO,CR5                               | Faecalibacterium             |
| 26611 | 2 | 23554 | CO,CR5                               | Faecalibacterium             |
| 26613 | 1 | 11866 | CO                                   | Faecalibacterium prausnitzii |
| 26744 | 1 | 11733 | CO                                   |                              |
| 26746 | 1 | 12132 | CO                                   | Ruminococcus bromii          |
| 26768 | 3 | 36254 | CO,UR,CR5                            | Ruminococcus                 |
| 26910 | 1 | 11990 | CO                                   | Ruminococcus bromii          |
| 26984 | 3 | 35344 | CO,UR,CR5                            |                              |
| 27392 | 2 | 24035 | CR8,CR5                              | Ruminococcus                 |
| 27490 | 1 | 12561 | CR8                                  | Clostridium                  |
| 27536 | 1 | 12066 | CR5                                  | Ruminococcus                 |
| 28064 | 1 | 12041 | UR                                   |                              |
| 28113 | 2 | 25545 | CO,CR8                               |                              |
| 28159 | 1 | 12607 | CR5                                  | Ruminococcus                 |
| 28504 | 3 | 38547 | CO_PMA,CR8_PMA,CR5_PMA               | Corynebacterium              |
| 28641 | 1 | 13073 | CO_PMA                               | Corynebacterium              |
| 28655 | 1 | 13034 | CR5                                  | Corynebacterium              |
| 28664 | 2 | 24340 | CO,CR5                               | Corynebacterium              |
| 28691 | 1 | 12293 | CO_PMA                               | Corynebacterium              |
| 28754 | 3 | 40691 | CO,CO_PMA,CR5                        | Corynebacterium              |
| 28768 | 1 | 12409 | CR5                                  | Corynebacterium              |
| 28819 | 1 | 13820 | CR8                                  | Corynebacterium              |
| 28952 | 1 | 13251 | CR8                                  | Corynebacterium              |
| 28961 | 2 | 22447 | CO_PMA,CR5_PMA                       | Corynebacterium              |
| 28989 | 2 | 24320 | CO,CR5                               | Corynebacterium              |
| 29039 | 0 | 0     | COURCR8CR5CO_PMAUR_PMACR8_PMACR5_PMA |                              |
| 29061 | 1 | 12804 | UR                                   | Corynebacterium              |
| 29382 | 2 | 2     | CO_PMA,CR8_PMA                       |                              |
| 29693 | 1 | 11892 | CO_PMA                               | Corynebacterium              |
| 29743 | 1 | 12633 | CO_PMA                               | Corynebacterium              |
| 29861 | 1 | 1     | CO_PMA                               |                              |
| 29901 | 3 | 37510 | CO,UR,CR5                            | Corynebacterium              |

|       |   |       |                                      |                 |
|-------|---|-------|--------------------------------------|-----------------|
| 29909 | 2 | 26071 | CO,CR5                               | Corynebacterium |
| 30016 | 1 | 12156 | CR5                                  | Corynebacterium |
| 30017 | 4 | 53743 | CO,UR,CR8,CR5                        | Corynebacterium |
| 30066 | 0 | 0     | COURCR8CR5CO_PMAUR_PMACR8_PMACR5_PMA |                 |
| 30142 | 1 | 11929 | CO_PMA                               | Corynebacterium |
| 30177 | 1 | 12916 | CO_PMA                               | Corynebacterium |
| 30421 | 1 | 13719 | CR5                                  | Corynebacterium |
| 30430 | 2 | 25588 | CO_PMA,CR8_PMA                       | Corynebacterium |
| 30513 | 3 | 36418 | CO_PMA,CR8_PMA,CR5_PMA               | Corynebacterium |
| 30645 | 1 | 12818 | CR8                                  | Corynebacterium |
| 30652 | 1 | 13013 | CO_PMA                               | Corynebacterium |
| 30734 | 1 | 12555 | CO_PMA                               | Corynebacterium |
| 30787 | 6 | 6     | UR,CR8,CR5,CO_PMA,CR8_PMA,CR5_PMA    |                 |
| 30849 | 2 | 25698 | CO_PMA,CR5_PMA                       | Corynebacterium |
| 30882 | 1 | 12450 | UR                                   | Corynebacterium |
| 30922 | 2 | 25577 | CO,CR5                               | Corynebacterium |
| 30996 | 4 | 53367 | CO,CO_PMA,CR8_PMA,CR5_PMA            | Corynebacterium |
| 31080 | 3 | 38006 | CO,UR,CR5                            | Corynebacterium |
| 31163 | 2 | 24939 | CR8,CR5_PMA                          | Corynebacterium |
| 31205 | 3 | 37317 | CO,UR,CR5                            | Corynebacterium |
| 31218 | 3 | 36560 | CO_PMA,CR8_PMA,CR5_PMA               | Corynebacterium |
| 31307 | 1 | 12838 | CR8_PMA                              | Corynebacterium |
| 31464 | 4 | 4     | CR8,CO_PMA,CR8_PMA,CR5_PMA           |                 |
| 31479 | 1 | 13557 | CR8                                  | Corynebacterium |
| 31616 | 1 | 13126 | UR                                   | Corynebacterium |
| 31655 | 1 | 13168 | CR8                                  | Corynebacterium |
| 31702 | 1 | 12178 | CO_PMA                               | Corynebacterium |
| 31823 | 1 | 13325 | CO_PMA                               | Corynebacterium |
| 32200 | 5 | 62261 | CO,CR8,CR5,CO_PMA,CR8_PMA            | Corynebacterium |
| 32344 | 1 | 13429 | CO_PMA                               | Corynebacterium |
| 32357 | 2 | 27220 | UR,CR5                               | Corynebacterium |
| 32411 | 1 | 12582 | CO_PMA                               | Corynebacterium |
| 32497 | 3 | 3     | CO_PMA,CR8_PMA,CR5_PMA               |                 |
| 32607 | 2 | 26344 | CR8,CR5                              | Corynebacterium |
| 32857 | 1 | 13228 | CR8                                  | Corynebacterium |
| 33058 | 4 | 53650 | CO,UR,CR8,CR5                        | Corynebacterium |
| 33189 | 1 | 11653 | UR                                   | Corynebacterium |
| 33258 | 2 | 24025 | CO_PMA,CR8_PMA                       | Corynebacterium |
| 33300 | 1 | 12993 | CR5                                  | Corynebacterium |
| 33488 | 1 | 14094 | CR5                                  | Corynebacterium |
| 33570 | 1 | 11937 | CR8                                  | Corynebacterium |
| 33576 | 1 | 13463 | CR8                                  | Corynebacterium |
| 33646 | 1 | 12764 | CR8                                  | Corynebacterium |
| 33688 | 1 | 13395 | CR8                                  | Corynebacterium |
| 33700 | 1 | 13858 | CO                                   | Corynebacterium |
| 33847 | 1 | 13074 | CR8                                  | Corynebacterium |
| 33873 | 3 | 38827 | CR8,CO_PMA,CR8_PMA                   | Corynebacterium |
| 33892 | 1 | 13248 | CR5                                  | Corynebacterium |
| 33895 | 1 | 10972 | CR5_PMA                              | Corynebacterium |
| 34124 | 1 | 13744 | CR5                                  | Corynebacterium |

|       |   |       |                        |                 |
|-------|---|-------|------------------------|-----------------|
| 34161 | 3 | 3     | CO_PMA,CR8_PMA,CR5_PMA |                 |
| 34240 | 4 | 51595 | CO,UR,CR8,CR5          | Corynebacterium |
| 34246 | 1 | 13293 | CR8                    | Corynebacterium |
| 34266 | 1 | 11950 | CR8_PMA                | Corynebacterium |
| 34318 | 1 | 11700 | CO_PMA                 | Corynebacterium |
| 34389 | 1 | 12911 | CO_PMA                 | Corynebacterium |
| 34438 | 3 | 39709 | CO,CO_PMA,CR5          | Corynebacterium |
| 34464 | 4 | 54584 | CO,UR,CR8,CR5          | Corynebacterium |
| 34708 | 1 | 12920 | CO_PMA                 | Corynebacterium |
| 34741 | 4 | 49786 | CO,UR,CR8,CR5          | Corynebacterium |
| 34803 | 1 | 13149 | CR8                    | Corynebacterium |
| 35009 | 1 | 12781 | CO_PMA                 | Corynebacterium |
| 35030 | 1 | 13334 | CO_PMA                 | Corynebacterium |
| 35042 | 3 | 3     | CO_PMA,CR8_PMA,CR5_PMA |                 |
| 35066 | 4 | 51697 | CR8,CR5,CO_PMA,CR8_PMA | Corynebacterium |
| 35165 | 1 | 13478 | CO_PMA                 | Corynebacterium |
| 35183 | 2 | 26661 | CR8,CR5                | Corynebacterium |
| 35227 | 2 | 25161 | CO,CR5                 | Corynebacterium |
| 35235 | 2 | 27117 | CO_PMA,CR8_PMA         | Corynebacterium |
| 35240 | 1 | 12368 | CO_PMA                 | Corynebacterium |
| 35254 | 2 | 24972 | CO_PMA,CR8_PMA         | Corynebacterium |
| 35383 | 1 | 1     | CO_PMA                 |                 |
| 35512 | 1 | 11867 | CO_PMA                 | Corynebacterium |
| 35586 | 3 | 39516 | CO,UR,CR5              | Corynebacterium |
| 35629 | 2 | 27435 | UR,CR5                 | Corynebacterium |
| 35716 | 2 | 25344 | CR8,CR5                | Corynebacterium |
| 35819 | 1 | 13134 | CO_PMA                 | Corynebacterium |
| 35860 | 1 | 11402 | CO_PMA                 | Corynebacterium |
| 36035 | 2 | 23560 | CO_PMA,CR8_PMA         | Corynebacterium |
| 36089 | 1 | 13245 | CR8                    | Corynebacterium |
| 36091 | 1 | 12653 | CO_PMA                 | Corynebacterium |
| 36137 | 1 | 13103 | CO_PMA                 | Corynebacterium |
| 36142 | 4 | 52660 | CO,UR,CR8,CR5          | Corynebacterium |
| 36231 | 1 | 12989 | CR8                    | Corynebacterium |
| 36381 | 2 | 26971 | UR,CR8                 | Corynebacterium |
| 36510 | 1 | 12104 | CO_PMA                 | Corynebacterium |
| 36542 | 1 | 13663 | CR5                    | Corynebacterium |
| 36693 | 2 | 22863 | CO_PMA,CR8_PMA         | Corynebacterium |
| 36754 | 1 | 12844 | CR5                    | Corynebacterium |
| 36759 | 1 | 13071 | CO                     | Corynebacterium |
| 36762 | 2 | 26832 | UR,CR8                 | Corynebacterium |
| 36763 | 2 | 26804 | CO,CR5                 | Corynebacterium |
| 36770 | 1 | 13549 | CR5                    | Corynebacterium |
| 36772 | 1 | 13104 | CR8                    | Corynebacterium |
| 36773 | 1 | 12416 | CR8                    | Corynebacterium |
| 36785 | 4 | 53260 | CO,UR,CR8,CR5          | Corynebacterium |
| 36787 | 3 | 36270 | CO,UR,CR5              | Corynebacterium |
| 36803 | 4 | 55215 | CO,UR,CR8,CR5          | Corynebacterium |
| 36804 | 2 | 26351 | CR8,CR5                | Corynebacterium |
| 36823 | 2 | 24424 | CO,CR5                 | Corynebacterium |

|       |   |       |                |                           |
|-------|---|-------|----------------|---------------------------|
| 36834 | 1 | 12612 | CR8            | Corynebacterium           |
| 36837 | 3 | 38192 | CO,UR,CR5      | Corynebacterium           |
| 36867 | 3 | 39604 | CO,UR,CR5      | Corynebacterium           |
| 36869 | 1 | 12469 | CR8            | Corynebacterium           |
| 36880 | 1 | 12178 | CR5            | Corynebacterium           |
| 36895 | 2 | 26601 | CR8,CR5        | Corynebacterium           |
| 36899 | 1 | 12809 | UR             | Corynebacterium flavesens |
| 36900 | 1 | 13361 | CR8            | Corynebacterium           |
| 36906 | 2 | 26445 | CR8,CR5        | Corynebacterium           |
| 36908 | 1 | 13104 | CR5            | Corynebacterium           |
| 36911 | 1 | 13247 | CO             | Corynebacterium           |
| 36930 | 2 | 24790 | CO,CR8         | Corynebacterium           |
| 36931 | 2 | 24103 | CO,CR5         | Corynebacterium           |
| 36933 | 2 | 27085 | CO,CR5         | Corynebacterium           |
| 36937 | 4 | 53580 | CO,UR,CR8,CR5  | Corynebacterium           |
| 36940 | 1 | 12317 | CR5            | Corynebacterium           |
| 36943 | 4 | 53492 | CO,UR,CR8,CR5  | Corynebacterium           |
| 36949 | 1 | 12791 | CR5            | Corynebacterium           |
| 36955 | 1 | 13365 | CR5            | Corynebacterium           |
| 36957 | 1 | 12861 | CR8            | Corynebacterium           |
| 36960 | 1 | 13304 | CR8            | Corynebacterium           |
| 36980 | 1 | 13797 | CR5            | Corynebacterium           |
| 36983 | 2 | 23677 | CO,CR8         | Corynebacterium           |
| 36992 | 1 | 13529 | CR8            | Corynebacterium           |
| 37002 | 1 | 13462 | UR             | Corynebacterium           |
| 37004 | 1 | 13481 | CR5            | Corynebacterium           |
| 37007 | 3 | 37907 | CO,UR,CR5      | Corynebacterium           |
| 37025 | 1 | 12507 | CO             | Corynebacterium           |
| 37029 | 1 | 14079 | CR5            | Corynebacterium           |
| 37036 | 1 | 12285 | CO             | Corynebacterium           |
| 37046 | 2 | 26222 | CR8,CR5        | Corynebacterium           |
| 37061 | 1 | 12684 | CO             | Corynebacterium           |
| 37071 | 3 | 39651 | CO,UR,CR5      | Corynebacterium           |
| 37076 | 2 | 24143 | CO_PMA,CR8_PMA | Corynebacterium           |
| 37086 | 1 | 12254 | CR5            | Corynebacterium           |
| 37089 | 4 | 53932 | CO,UR,CR8,CR5  | Corynebacterium           |
| 37097 | 2 | 25964 | CR8,CR5_PMA    | Corynebacterium           |
| 37107 | 3 | 39220 | CO,UR,CR8      | Corynebacterium           |
| 37124 | 3 | 37532 | CO,UR,CR8      | Corynebacterium           |
| 37125 | 3 | 39444 | CO,UR,CR8      | Corynebacterium           |
| 37129 | 4 | 54442 | CO,UR,CR8,CR5  | Corynebacterium           |
| 37151 | 2 | 27471 | CR8,CR5        | Corynebacterium           |
| 37161 | 2 | 26572 | CO,CR5         | Corynebacterium           |
| 37166 | 3 | 35433 | CO,UR,CR8      | Corynebacterium           |
| 37170 | 2 | 25369 | CR8,CR5        | Corynebacterium           |
| 37172 | 2 | 24267 | CR8,CR5        | Corynebacterium           |
| 37178 | 4 | 51528 | CO,UR,CR8,CR5  | Corynebacterium           |
| 37180 | 1 | 13117 | CR5            | Corynebacterium           |
| 37183 | 2 | 25551 | CO,CR5         | Corynebacterium           |
| 37193 | 3 | 39173 | CO,UR,CR8      | Corynebacterium           |

|       |   |       |                |                             |
|-------|---|-------|----------------|-----------------------------|
| 37198 | 2 | 26366 | UR,CR8         | Corynebacterium             |
| 37199 | 2 | 25129 | CR8,CR5        | Corynebacterium             |
| 37201 | 1 | 12505 | CR8            | Corynebacterium             |
| 37226 | 4 | 49693 | CO,UR,CR8,CR5  | Corynebacterium             |
| 37232 | 1 | 13298 | CR8            | Corynebacterium             |
| 37247 | 2 | 25743 | CR8,CR5        | Corynebacterium jeikeium    |
| 37253 | 2 | 23350 | CO_PMA,CR8_PMA | Corynebacterium             |
| 37255 | 1 | 13203 | CR8            | Corynebacterium             |
| 37259 | 1 | 12811 | CR8            | Corynebacterium             |
| 37264 | 1 | 11960 | CR5            | Corynebacterium             |
| 37268 | 3 | 35839 | CO,UR,CR5      | Corynebacterium             |
| 37280 | 2 | 27077 | CO,CR8         | Corynebacterium riegelii    |
| 37293 | 4 | 49133 | CO,UR,CR8,CR5  | Corynebacterium             |
| 37300 | 2 | 27391 | UR,CR8         | Corynebacterium             |
| 37312 | 2 | 24874 | CO,UR          | Corynebacterium variabile   |
| 37315 | 4 | 53592 | CO,UR,CR8,CR5  | Corynebacterium             |
| 37316 | 1 | 12420 | UR             | Corynebacterium             |
| 37325 | 1 | 13116 | CO             | Corynebacterium             |
| 37329 | 2 | 25406 | UR,CR5         | Corynebacterium             |
| 37358 | 1 | 14085 | CR5            | Corynebacterium             |
| 37364 | 1 | 11905 | CR8            | Corynebacterium             |
| 37365 | 2 | 27939 | CR8,CR5        | Corynebacterium             |
| 37390 | 1 | 11803 | CO             | Rhodococcus                 |
| 37393 | 1 | 12410 | CR8            | Actinokineospora diospyrosa |
| 37394 | 3 | 37327 | CO,UR,CR5      |                             |
| 37398 | 2 | 25361 | CO,CR5         | Rhodococcus                 |
| 37403 | 1 | 12059 | CR8            | Mycobacterium               |
| 37407 | 1 | 12491 | CR8            | Actinokineospora diospyrosa |
| 37429 | 3 | 38776 | CO,UR,CR5      |                             |
| 37449 | 1 | 12985 | CR5            | Gordonia                    |
| 37494 | 1 | 13110 | CR5            |                             |
| 37506 | 1 | 13089 | CO             | Rhodococcus                 |
| 37536 | 3 | 36799 | CO,UR,CR5      |                             |
| 37549 | 1 | 12052 | CO             |                             |
| 37562 | 1 | 12139 | CR8            | Rhodococcus                 |
| 37566 | 2 | 25278 | UR,CO_PMA      |                             |
| 37576 | 3 | 39072 | CO,UR,CR5      |                             |
| 37579 | 1 | 13213 | CR5            |                             |
| 37598 | 1 | 13184 | CO             | Frankia                     |
| 37609 | 1 | 11658 | CR8            |                             |
| 37611 | 1 | 12146 | CR8            | Amycolatopsis               |
| 37619 | 1 | 13158 | CR8            | Actinokineospora diospyrosa |
| 37622 | 1 | 13291 | CR5            | Gordonia                    |
| 37630 | 2 | 23712 | CO,CR8         | Mycobacterium               |
| 37633 | 1 | 12562 | CR5            |                             |
| 37653 | 1 | 12508 | UR             | Gordonia                    |
| 37671 | 2 | 25063 | CO,CR8         | Rhodococcus                 |
| 37679 | 3 | 36481 | CO,UR,CR5      | Rhodococcus                 |
| 37688 | 3 | 38687 | CO,UR,CR5      | Mycobacterium               |
| 37691 | 1 | 12018 | CR8            | Rhodococcus                 |

|       |   |       |               |                           |
|-------|---|-------|---------------|---------------------------|
| 37726 | 3 | 41645 | CO,UR,CR5     | Mycobacterium             |
| 37735 | 3 | 36713 | CO,UR,CR5     |                           |
| 37737 | 2 | 25153 | CR8,CR5       | Mycobacterium             |
| 37746 | 1 | 12487 | CR5           | Pseudonocardia            |
| 37763 | 1 | 12610 | CR5           | Kineococcus               |
| 37768 | 1 | 12698 | CR8           | Amycolatopsis             |
| 37779 | 3 | 36264 | CO,UR,CR5     |                           |
| 37783 | 2 | 26470 | CO,CR5        |                           |
| 37813 | 3 | 38391 | CO,UR,CR5     |                           |
| 37814 | 2 | 24997 | CO,CR5        | Frankia                   |
| 37820 | 2 | 25766 | CO,CR5        |                           |
| 37833 | 1 | 11831 | CR5           |                           |
| 37835 | 3 | 37940 | CO,UR,CR5     |                           |
| 37838 | 2 | 25837 | CO,CR5        | Rhodococcus               |
| 37841 | 1 | 11991 | CR8           | Amycolatopsis             |
| 37860 | 2 | 23818 | CR8,CR5       |                           |
| 37868 | 2 | 24420 | CO,CR8        | Rhodococcus               |
| 37877 | 4 | 54111 | CO,UR,CR8,CR5 |                           |
| 37881 | 1 | 13071 | CR5           | Kineococcus               |
| 37902 | 1 | 12364 | CR8           |                           |
| 37907 | 2 | 24276 | CO,CR8        | Mycobacterium             |
| 37917 | 1 | 12018 | CO            | Kineococcus radiotolerans |
| 37920 | 2 | 24234 | UR,CR5        |                           |
| 37921 | 3 | 37760 | CO,UR,CR5     | Rhodococcus               |
| 37924 | 1 | 11731 | CR8           |                           |
| 37943 | 1 | 12518 | CR8           | Mycobacterium             |
| 37948 | 3 | 37838 | CO,UR,CR5     | Rhodococcus               |
| 37955 | 2 | 23474 | CO,CR8        | Mycobacterium             |
| 37963 | 1 | 12125 | CO            |                           |
| 37984 | 2 | 24574 | CO,CR8        | Mycobacterium             |
| 37996 | 2 | 25583 | CR8,CR5       | Mycobacterium             |
| 38001 | 3 | 38516 | CO,UR,CR8     | Mycobacterium             |
| 38020 | 2 | 26963 | CR8,CR5       |                           |
| 38072 | 1 | 12562 | CO            | Frankia                   |
| 38083 | 1 | 12068 | CO            |                           |
| 38094 | 1 | 12286 | CR8           | Amycolatopsis             |
| 38099 | 2 | 24954 | CO,CR5        | Rhodococcus               |
| 38101 | 2 | 26074 | CO,CR5        | Frankia                   |
| 38103 | 1 | 12303 | CR5           | Gordonia amarae           |
| 38108 | 1 | 12313 | CR5           | Saccharopolyspora         |
| 38115 | 1 | 12462 | CR8           | Mycobacterium             |
| 38137 | 1 | 12146 | CR8           | Pseudonocardia            |
| 38164 | 1 | 13477 | CO            |                           |
| 38165 | 1 | 11737 | CR5           |                           |
| 38168 | 1 | 13445 | CR5           | Mycobacterium             |
| 38210 | 3 | 37662 | CO,UR,CR5     |                           |
| 38238 | 1 | 11728 | CO            | Mycobacterium             |
| 38248 | 1 | 12888 | CO            | Mycobacterium             |
| 38266 | 1 | 13304 | CO            | Frankia                   |
| 38270 | 1 | 12408 | CR5           | Gordonia                  |

|       |   |       |           |                            |
|-------|---|-------|-----------|----------------------------|
| 38272 | 1 | 12169 | CR8       | Rhodococcus                |
| 38281 | 1 | 12718 | CR8       |                            |
| 38303 | 2 | 25371 | UR,CR5    |                            |
| 38331 | 2 | 26322 | UR,CR5    | Nocardia                   |
| 38337 | 1 | 13512 | CR5       | Pseudonocardia             |
| 38349 | 1 | 12678 | CR8       | Pseudonocardia             |
| 38371 | 1 | 12120 | CR8       | Mycobacterium              |
| 38393 | 3 | 38460 | CO,UR,CR5 |                            |
| 38394 | 1 | 12461 | CR5       | Rhodococcus                |
| 38400 | 1 | 12315 | UR        | Tsukamurella paurometabola |
| 38427 | 1 | 12989 | CO        | Mycobacterium              |
| 38432 | 3 | 38938 | CO,UR,CR8 |                            |
| 38433 | 3 | 38391 | CO,UR,CR5 |                            |
| 38438 | 1 | 12208 | CR8       | Mycobacterium              |
| 38444 | 2 | 23277 | CO,CR8    | Mycobacterium              |
| 38449 | 2 | 23808 | UR,CR8    | Rhodococcus                |
| 38463 | 1 | 12218 | UR        | Blastococcus saxobidens    |
| 38499 | 1 | 13084 | CR5       |                            |
| 38506 | 1 | 13262 | CR8       | Streptomyces               |
| 38519 | 1 | 12476 | UR        |                            |
| 38524 | 2 | 25911 | CO,CR8    | Agromyces                  |
| 38628 | 2 | 26194 | CR8,CR5   | Nocardioides               |
| 38640 | 2 | 25942 | CO,CR8    |                            |
| 38646 | 3 | 37645 | CO,UR,CR5 | Nocardioides               |
| 38679 | 1 | 13169 | CR5       | Nocardioides               |
| 38691 | 1 | 12262 | CO        | Streptomyces               |
| 38721 | 1 | 12670 | CO        | Agromyces                  |
| 38726 | 2 | 26070 | CR8,CR5   | Geodermatophilus           |
| 38746 | 1 | 12279 | CR5       | Nocardioides               |
| 38747 | 1 | 12222 | CO        | Streptomyces               |
| 38755 | 1 | 12545 | CO        | Streptomyces               |
| 38770 | 1 | 13104 | UR        | Microlunatus               |
| 38808 | 1 | 12074 | CR8       | Streptomyces               |
| 38813 | 1 | 13115 | UR        | Nocardioides oleivorans    |
| 38823 | 1 | 12702 | CO        | Streptomyces               |
| 38848 | 2 | 25258 | CO,CR8    | Agromyces                  |
| 38907 | 2 | 26981 | CO,CR5    | Friedmanniella             |
| 38920 | 3 | 37554 | CO,UR,CR5 | Nocardioides               |
| 38958 | 3 | 39317 | CO,UR,CR5 | Nocardioides               |
| 38959 | 1 | 11853 | CR8       | Streptomyces               |
| 38996 | 3 | 39904 | CO,UR,CR5 | Nocardioides               |
| 39019 | 1 | 11609 | CR8       |                            |
| 39027 | 2 | 26851 | CR8,CR5   | Nocardioides               |
| 39044 | 1 | 12499 | UR        | Actinopolymorpha           |
| 39054 | 1 | 11943 | CR5       | Geodermatophilus           |
| 39060 | 1 | 11871 | CR8       | Blastococcus aggregatus    |
| 39081 | 1 | 13791 | CO        | Nocardioides               |
| 39084 | 1 | 11970 | CO        | Streptomyces               |
| 39092 | 3 | 36923 | CO,UR,CR5 | Marmoricola                |
| 39094 | 1 | 11718 | CO        | Agromyces                  |

|       |   |       |               |                           |
|-------|---|-------|---------------|---------------------------|
| 39106 | 1 | 12415 | UR            |                           |
| 39109 | 1 | 12597 | CO            | Streptomyces              |
| 39112 | 1 | 12098 | CR8           | Streptomyces              |
| 39124 | 4 | 49834 | CO,UR,CR8,CR5 | Blastococcus aggregatus   |
| 39208 | 2 | 25581 | CR8,CR5       | Geodermatophilus          |
| 39225 | 1 | 12125 | CR8           | Agromyces                 |
| 39242 | 2 | 23991 | CO,CR8        | Agromyces                 |
| 39248 | 1 | 12340 | CR8           | Streptomyces              |
| 39259 | 1 | 12830 | CO            | Agromyces                 |
| 39321 | 1 | 11812 | UR            | Microthricum phosphovorus |
| 39343 | 1 | 13344 | CR5           |                           |
| 39401 | 2 | 24373 | CR8,CR5       | Streptomyces              |
| 39415 | 1 | 12279 | CR8           | Actinomyces               |
| 39424 | 1 | 12729 | CO            | Streptomyces              |
| 39435 | 1 | 12599 | CO            | Streptomyces              |
| 39446 | 1 | 12880 | CR8           | Nocardioides              |
| 39473 | 1 | 12919 | CR5           | Nocardioides lentus       |
| 39484 | 4 | 49692 | CO,UR,CR8,CR5 | Blastococcus aggregatus   |
| 39541 | 1 | 12805 | CO            | Streptomyces              |
| 39549 | 2 | 27637 | CR8,CR5       | Streptomyces              |
| 39558 | 1 | 12953 | CO            |                           |
| 39559 | 2 | 25579 | CR8,CR5       | Nocardioides              |
| 39588 | 2 | 26255 | CR8,CR5       |                           |
| 39602 | 1 | 12378 | CO            |                           |
| 39606 | 1 | 12298 | CR8           | Streptomyces              |
| 39607 | 1 | 12548 | CR8           | Actinomyces               |
| 39644 | 1 | 12232 | CR8           |                           |
| 39646 | 1 | 11672 | CO            | Nocardioides              |
| 39650 | 3 | 40318 | CO,UR,CR5     | Streptomyces              |
| 39654 | 3 | 38645 | CO,UR,CR5     | Marmoricola               |
| 39661 | 2 | 24852 | CO,CR8        |                           |
| 39676 | 1 | 11957 | UR            | Aeromicrobium             |
| 39684 | 1 | 12217 | UR            | Aeromicrobium             |
| 39719 | 2 | 25997 | CO,CR5        | Friedmanniella            |
| 39733 | 3 | 39089 | CO,CO_PMA,CR8 | Agromyces                 |
| 39746 | 2 | 24431 | CO,CR8        | Streptomyces              |
| 39774 | 1 | 13430 | CR5           | Friedmanniella            |
| 39802 | 1 | 12692 | CO            | Streptomyces              |
| 39809 | 1 | 12091 | UR            | Aeromicrobium             |
| 39819 | 1 | 11771 | CO            | Streptomyces              |
| 39833 | 1 | 13070 | CR5           |                           |
| 39857 | 1 | 12714 | CO            |                           |
| 39869 | 1 | 11625 | UR            | Aeromicrobium             |
| 39909 | 1 | 12302 | CR8           | Streptomyces              |
| 39910 | 2 | 26548 | CO,CR8        |                           |
| 39926 | 2 | 25257 | CR8,CR5       | Geodermatophilus          |
| 39936 | 1 | 11742 | UR            |                           |
| 39946 | 1 | 13078 | CO            | Micrococcus luteus        |
| 39968 | 1 | 12773 | CO            | Propionimonas             |
| 39989 | 1 | 12829 | CO            | Friedmanniella            |

|       |   |       |                   |                              |
|-------|---|-------|-------------------|------------------------------|
| 40014 | 2 | 24087 | CO,CR8            | Agromyces                    |
| 40039 | 1 | 12818 | CO                |                              |
| 40042 | 3 | 39855 | CO,UR,CR5         | Nocardioides                 |
| 40049 | 1 | 11972 | CO                | Streptomyces                 |
| 40055 | 2 | 24039 | CR8,CR5           | Geodermatophilus             |
| 40067 | 1 | 12822 | CO                | Agromyces                    |
| 40076 | 2 | 25530 | CR8,CR5           | Geodermatophilus             |
| 40101 | 1 | 12776 | CR5               |                              |
| 40117 | 2 | 24606 | CO,CR5            |                              |
| 40126 | 1 | 12587 | CR8               | Streptomyces                 |
| 40141 | 1 | 12935 | CO                | Kocuria                      |
| 40145 | 1 | 13128 | CR5               | Kocuria marina               |
| 40148 | 3 | 39164 | CO,UR,CR5         |                              |
| 40152 | 2 | 25604 | CO,CR5            | Arthrobacter                 |
| 40156 | 2 | 24935 | CR8,CR5           | Dermabacter hominis          |
| 40158 | 4 | 56685 | UR,CR8,CR5,CO_PMA | Propionibacterium acnes      |
| 40159 | 3 | 40070 | CO,CO_PMA,CR5     | Propionibacterium acnes      |
| 40162 | 1 | 12063 | CO_PMA            | Propionibacterium acnes      |
| 40164 | 1 | 11679 | CR8               | Actinomyces oris             |
| 40170 | 2 | 26993 | CR8,CR5           | Dermabacter hominis          |
| 40171 | 2 | 27486 | CO,CR5            | Propionibacterium            |
| 40172 | 4 | 50140 | CO,UR,CR8,CR5     | Arthrobacter                 |
| 40175 | 1 | 13012 | CO                | Arthrobacter                 |
| 40178 | 2 | 26320 | CO,UR             | Micrococcus luteus           |
| 40182 | 2 | 23170 | CO_PMA,CR5_PMA    | Propionibacterium acnes      |
| 40188 | 1 | 12255 | CO                | Propionibacterium            |
| 40191 | 3 | 39049 | CO,UR,CR5         | Arthrobacter                 |
| 40193 | 3 | 39555 | CO,UR,CR5         | Propionibacterium            |
| 40199 | 3 | 37478 | CO,UR,CR5         | Arthrobacter                 |
| 40202 | 2 | 26265 | CO,UR             | Micrococcus luteus           |
| 40206 | 3 | 36798 | CO,UR,CR5         | Arthrobacter                 |
| 40209 | 1 | 12860 | CR8               | Arthrobacter                 |
| 40210 | 3 | 41037 | CO,UR,CR5         | Propionibacterium            |
| 40216 | 1 | 14071 | CR5               | Arthrobacter                 |
| 40219 | 2 | 26598 | CO,UR             | Micrococcus luteus           |
| 40220 | 2 | 25655 | CR8,CR5           | Dermabacter hominis          |
| 40222 | 2 | 25169 | CO,UR             | Micrococcus luteus           |
| 40224 | 1 | 13064 | CR5               | Arthrobacter                 |
| 40234 | 1 | 12052 | CO                | Arthrobacter                 |
| 40235 | 2 | 27118 | CO,CR5            | Kocuria marina               |
| 40238 | 2 | 25025 | CO,UR             | Micrococcus luteus           |
| 40241 | 4 | 50977 | CO,UR,CR8,CR5     | Propionibacterium granulosum |
| 40245 | 4 | 53449 | CO,UR,CR8,CR5     | Arthrobacter                 |
| 40262 | 3 | 38625 | CO,UR,CR5         | Arthrobacter                 |
| 40263 | 1 | 11933 | UR                | Micrococcus                  |
| 40264 | 3 | 41475 | UR,CO_PMA,CR8     | Propionibacterium acnes      |
| 40278 | 2 | 24397 | CO,CR8            | Kytococcus                   |
| 40286 | 2 | 24093 | UR,CR8            | Actinomyces oris             |
| 40289 | 2 | 26010 | CO,UR             | Micrococcus luteus           |
| 40303 | 3 | 39595 | CO,UR,CR5         | Arthrobacter                 |

|       |   |       |               |                         |
|-------|---|-------|---------------|-------------------------|
| 40304 | 1 | 13035 | CR5           | Arthrobacter            |
| 40314 | 2 | 26363 | CO,UR         | Micrococcus luteus      |
| 40322 | 1 | 11898 | UR            | Micrococcus luteus      |
| 40325 | 2 | 24835 | CO,UR         | Micrococcus luteus      |
| 40333 | 2 | 28129 | CR8,CR5       | Propionibacterium       |
| 40334 | 4 | 49849 | CO,UR,CR8,CR5 | Actinomyces oris        |
| 40335 | 2 | 25315 | CO,CR8        |                         |
| 40337 | 1 | 12401 | CR5           | Arthrobacter            |
| 40340 | 2 | 26273 | CO,CR5        | Arthrobacter            |
| 40347 | 2 | 26608 | CO,UR         | Micrococcus luteus      |
| 40352 | 1 | 13425 | CO            | Tessaracoccus           |
| 40356 | 2 | 27406 | CR8,CR5       | Propionibacterium acnes |
| 40358 | 1 | 12899 | CR8           | Arthrobacter            |
| 40373 | 2 | 26185 | CO,UR         | Micrococcus luteus      |
| 40375 | 1 | 12426 | CO            | Georgenia               |
| 40376 | 1 | 12403 | UR            | Micrococcus             |
| 40378 | 1 | 12596 | CR8           | Dermabacter hominis     |
| 40382 | 3 | 36670 | CO,UR,CR5     | Arthrobacter            |
| 40389 | 2 | 26180 | UR,CR5        | Dermabacter             |
| 40391 | 1 | 12807 | UR            | Dermabacter             |
| 40394 | 2 | 28624 | CR8,CR5       | Arthrobacter            |
| 40399 | 2 | 25372 | CO,UR         | Micrococcus luteus      |
| 40402 | 1 | 13394 | CR5           | Dermabacter             |
| 40407 | 2 | 23852 | UR,CR8        | Actinomyces             |
| 40408 | 3 | 37127 | CO,UR,CR8     | Kytococcus              |
| 40412 | 2 | 24332 | CO,UR         |                         |
| 40413 | 1 | 12134 | CR8           | Arthrobacter            |
| 40415 | 1 | 12432 | CR5           | Arthrobacter            |
| 40416 | 1 | 12230 | CR5           | Arthrobacter            |
| 40419 | 1 | 12157 | CR8           |                         |
| 40425 | 1 | 12900 | CO            | Arthrobacter            |
| 40426 | 3 | 36880 | CO,UR,CR8     | Kytococcus schroeteri   |
| 40427 | 1 | 12620 | CR5           | Arthrobacter            |
| 40436 | 2 | 26586 | CO,UR         | Micrococcus luteus      |
| 40442 | 1 | 12854 | CO            | Actinomyces             |
| 40443 | 2 | 23430 | UR,CR8        | Actinomyces             |
| 40455 | 2 | 25742 | CO,CR5        | Arthrobacter            |
| 40473 | 1 | 13405 | UR            | Micrococcus             |
| 40474 | 2 | 26690 | CO,CR5        | Arthrobacter            |
| 40476 | 1 | 12173 | UR            | Micrococcus luteus      |
| 40479 | 2 | 26501 | CO,UR         | Micrococcus luteus      |
| 40484 | 2 | 25579 | CO,UR         | Micrococcus luteus      |
| 40486 | 1 | 12465 | CO            | Arthrobacter            |
| 40488 | 3 | 37993 | CO,UR,CR5     | Arthrobacter            |
| 40490 | 1 | 12449 | CO            | Micrococcus luteus      |
| 40492 | 2 | 23758 | UR,CR8        | Actinomyces             |
| 40495 | 3 | 37469 | CO,UR,CR5     | Arthrobacter            |
| 40503 | 1 | 11724 | CR8           | Arthrobacter            |
| 40505 | 3 | 39085 | CO,UR,CR5     |                         |
| 40510 | 2 | 26091 | CO,UR         | Micrococcus luteus      |

|       |   |       |               |                         |
|-------|---|-------|---------------|-------------------------|
| 40512 | 3 | 39297 | CO,UR,CR5     | Arthrobacter            |
| 40518 | 2 | 28163 | CR8,CR5       | Propionibacterium       |
| 40522 | 3 | 37398 | CO,UR,CR5     | Arthrobacter            |
| 40526 | 1 | 12725 | CR5           | Arthrobacter            |
| 40529 | 1 | 13716 | CR5           | Dermabacter             |
| 40531 | 1 | 13710 | CR5           | Dermabacter             |
| 40535 | 2 | 25045 | CO,CR5        | Arthrobacter            |
| 40549 | 2 | 23789 | CO,CR8        | Actinomyces             |
| 40550 | 2 | 25572 | UR,CO_PMA     | Propionibacterium acnes |
| 40558 | 2 | 24693 | CO,CR5        | Arthrobacter            |
| 40568 | 1 | 12966 | CO            | Arthrobacter            |
| 40574 | 1 | 12647 | UR            | Micrococcus luteus      |
| 40575 | 2 | 26258 | CO,UR         | Micrococcus luteus      |
| 40577 | 2 | 25445 | UR,CR5        | Arthrobacter            |
| 40578 | 1 | 13781 | CR5           | Knoellia subterranea    |
| 40583 | 1 | 12401 | CR5           | Arthrobacter            |
| 40586 | 2 | 26761 | CO,CR5        | Arthrobacter            |
| 40587 | 1 | 12452 | CR5           | Arthrobacter            |
| 40592 | 1 | 11969 | CR8           |                         |
| 40597 | 2 | 26209 | CO,CR8        | Propionibacterium       |
| 40610 | 2 | 26475 | CO,CR5        | Arthrobacter            |
| 40611 | 1 | 13356 | CO            | Cellulomonas            |
| 40619 | 1 | 12366 | CO            | Cellulomonas            |
| 40620 | 1 | 12702 | CR8           | Arthrobacter            |
| 40621 | 2 | 25604 | CO,UR         | Micrococcus luteus      |
| 40629 | 1 | 13281 | CO            |                         |
| 40639 | 1 | 12950 | CO            | Arthrobacter            |
| 40640 | 2 | 25496 | CO,UR         | Micrococcus luteus      |
| 40651 | 2 | 23457 | UR,CR8        | Actinomyces oris        |
| 40666 | 2 | 25510 | CO,CR5        | Arthrobacter            |
| 40676 | 2 | 25792 | CR8,CR5       | Arthrobacter            |
| 40678 | 2 | 25018 | CO,CR8        | Arthrobacter            |
| 40679 | 1 | 12962 | UR            | Micrococcus             |
| 40685 | 1 | 13214 | CO_PMA        | Propionibacterium       |
| 40686 | 4 | 54588 | CO,UR,CR8,CR5 | Propionibacterium acnes |
| 40696 | 2 | 25301 | CO,UR         | Micrococcus luteus      |
| 40697 | 2 | 25386 | CO,UR         | Micrococcus luteus      |
| 40705 | 1 | 12571 | CR5           | Knoellia subterranea    |
| 40716 | 3 | 39471 | CO,UR,CR5     |                         |
| 40718 | 2 | 26834 | CO,UR         | Micrococcus luteus      |
| 40719 | 1 | 13209 | CR8           | Brevibacterium          |
| 40723 | 1 | 13523 | CR5           | Arthrobacter            |
| 40727 | 2 | 26216 | CO,CR5        | Kocuria marina          |
| 40733 | 2 | 24355 | UR,CR8        | Actinomyces             |
| 40740 | 2 | 26280 | CO,UR         | Micrococcus luteus      |
| 40741 | 2 | 25710 | CO,CR8        | Arthrobacter            |
| 40743 | 1 | 12303 | CO            | Propionibacterium       |
| 40749 | 3 | 39437 | CO,UR,CR5     |                         |
| 40753 | 2 | 24989 | CO,UR         | Micrococcus luteus      |
| 40757 | 1 | 13000 | CO            | Micrococcus luteus      |

|       |   |       |               |                            |
|-------|---|-------|---------------|----------------------------|
| 40766 | 1 | 13966 | CR5           | Propionibacterium          |
| 40774 | 1 | 11831 | CR8           | Actinomyces                |
| 40778 | 2 | 26506 | CO,CR5        | Arthrobacter               |
| 40779 | 2 | 25447 | UR,CR8        | Actinomyces oris           |
| 40792 | 1 | 13220 | CR8           | Brevibacterium             |
| 40797 | 1 | 11801 | CR8           | Arthrobacter               |
| 40805 | 2 | 25163 | CO,CR8        | Arthrobacter               |
| 40819 | 1 | 12356 | UR            | Micrococcus                |
| 40827 | 3 | 35803 | CO,UR,CR5     | Arthrobacter               |
| 40834 | 1 | 12603 | CO            | Micrococcus luteus         |
| 40838 | 1 | 11831 | CR8           | Actinomyces                |
| 40846 | 1 | 12870 | CO            | Kocuria marina             |
| 40853 | 1 | 13538 | CR8           | Propionibacterium          |
| 40856 | 1 | 12192 | UR            | Janibacter                 |
| 40861 | 2 | 25393 | CO,UR         | Micrococcus luteus         |
| 40867 | 1 | 12832 | CR5           | Arthrobacter               |
| 40875 | 3 | 37417 | CO,UR,CR5     | Arthrobacter               |
| 40876 | 1 | 13194 | CR5           | Arthrobacter               |
| 40882 | 2 | 24654 | UR,CR8        | Brevibacterium             |
| 40884 | 2 | 25558 | CO,UR         | Micrococcus luteus         |
| 40889 | 1 | 12775 | UR            | Micrococcus                |
| 40890 | 1 | 12212 | CO            | Georgenia                  |
| 40892 | 2 | 24360 | UR,CR8        | Actinomyces                |
| 40893 | 2 | 27069 | CR8,CR5       | Dermabacter hominis        |
| 40898 | 3 | 39470 | CO,UR,CR5     | Arthrobacter               |
| 40899 | 1 | 12675 | UR            | Dermabacter                |
| 40908 | 1 | 13753 | CR5           | Dermabacter                |
| 40911 | 2 | 25877 | CO,UR         | Micrococcus luteus         |
| 40912 | 3 | 38764 | CO,UR,CR5     | Propionibacterium          |
| 40917 | 1 | 13240 | CO            | Cellulomonas               |
| 40919 | 2 | 24950 | CO,CR8        | Arthrobacter               |
| 40920 | 2 | 23929 | CR8,CR5       | Arthrobacter agilis        |
| 40921 | 1 | 12976 | CO            |                            |
| 40925 | 2 | 25215 | CO,CO_PMA     | Cellulomonas               |
| 40929 | 1 | 12289 | CR8           | Actinomyces                |
| 40930 | 1 | 11866 | UR            | Arthrobacter               |
| 40932 | 4 | 55649 | CO,UR,CR8,CR5 | Propionibacterium acnes    |
| 40943 | 1 | 13117 | UR            | Micrococcus                |
| 40945 | 2 | 24732 | UR,CR5        | Arthrobacter               |
| 40958 | 2 | 23894 | UR,CR8        | Actinomyces                |
| 40960 | 2 | 25144 | CO,UR         | Micrococcus luteus         |
| 40962 | 1 | 13163 | CO            | Arthrobacter               |
| 40968 | 4 | 50870 | CO,UR,CR8,CR5 | Arthrobacter               |
| 40976 | 2 | 27008 | CO,CR5        |                            |
| 40979 | 1 | 12814 | CR5           | Arthrobacter               |
| 40983 | 1 | 12702 | CR8           | Brevibacterium paucivorans |
| 40984 | 3 | 36659 | CO,UR,CR5     |                            |
| 40988 | 1 | 13545 | CO            |                            |
| 40992 | 2 | 25829 | CO,UR         | Micrococcus luteus         |
| 40996 | 1 | 13785 | CR5           | Dermabacter                |

|       |   |       |               |                         |
|-------|---|-------|---------------|-------------------------|
| 41001 | 4 | 48981 | CO,UR,CR8,CR5 |                         |
| 41006 | 4 | 53548 | CO,UR,CR8,CR5 | Propionibacterium acnes |
| 41008 | 4 | 50100 | CO,UR,CR8,CR5 | Arthrobacter            |
| 41012 | 2 | 26611 | CR8,CR5_PMA   | Propionibacterium acnes |
| 41013 | 1 | 12517 | CO            | Arthrobacter            |
| 41015 | 1 | 11989 | CO            |                         |
| 41016 | 3 | 37674 | CO,UR,CR8     | Kytococcus              |
| 41018 | 2 | 26512 | UR,CR5        | Dermabacter             |
| 41022 | 2 | 24052 | CO,CR5        | Arthrobacter            |
| 41035 | 3 | 37897 | CO,UR,CR5     | Arthrobacter            |
| 41048 | 2 | 25593 | CO,CR8        | Arthrobacter            |
| 41049 | 2 | 25759 | CO,CR5        | Arthrobacter            |
| 41050 | 2 | 24937 | CO,CR8        | Arthrobacter            |
| 41054 | 2 | 26693 | CO,UR         | Micrococcus luteus      |
| 41058 | 2 | 25886 | CO,CR8        | Arthrobacter            |
| 41060 | 1 | 13048 | CO            |                         |
| 41061 | 2 | 26828 | CO,UR         | Micrococcus luteus      |
| 41068 | 4 | 53541 | CO,UR,CR8,CR5 | Propionibacterium       |
| 41078 | 1 | 12782 | CO            |                         |
| 41079 | 2 | 25042 | CO,CR8        | Arthrobacter            |
| 41080 | 4 | 52696 | CO,UR,CR8,CR5 | Arthrobacter            |
| 41085 | 1 | 13844 | CR8           | Propionibacterium       |
| 41088 | 4 | 49209 | CO,UR,CR8,CR5 | Microbacterium          |
| 41101 | 2 | 25333 | CO,CR8        | Microbacterium          |
| 41103 | 1 | 11989 | CR8           | Nocardiopsis            |
| 41105 | 2 | 24820 | CO,CR5        | Actinoplanes            |
| 41110 | 1 | 12431 | CO            | Actinoplanes            |
| 41114 | 3 | 37570 | CO,UR,CR5     | sfA                     |
| 41119 | 1 | 11719 | CR8           | sfA                     |
| 41123 | 2 | 26068 | CO,UR         | Microbacterium          |
| 41163 | 1 | 11808 | CO            | Microbacterium          |
| 41171 | 1 | 12264 | CR8           | Microbacterium          |
| 41194 | 1 | 12667 | UR            | Actinomadura            |
| 41199 | 2 | 25127 | CO,CR5        | Actinoplanes            |
| 41204 | 1 | 13300 | CR5           |                         |
| 41209 | 1 | 12613 | CO            |                         |
| 41227 | 4 | 50880 | CO,UR,CR8,CR5 | sfA                     |
| 41235 | 2 | 26350 | CO,CR5        | sfA                     |
| 41237 | 1 | 11907 | CR5           | Actinoplanes            |
| 41250 | 1 | 13077 | CO            |                         |
| 41253 | 1 | 12238 | CR5           |                         |
| 41272 | 1 | 12436 | CR5           |                         |
| 41275 | 2 | 25569 | CO,CR8        | Microbacterium          |
| 41284 | 4 | 49560 | CO,UR,CR8,CR5 | Microbacterium          |
| 41285 | 3 | 39346 | CO,UR,CR5     | sfA                     |
| 41288 | 1 | 12791 | CO            |                         |
| 41293 | 3 | 39728 | CO,UR,CR5     | Microbacterium          |
| 41301 | 1 | 12540 | CO            | sfA                     |
| 41305 | 2 | 25430 | CO,CR8        | sfA                     |
| 41332 | 1 | 11947 | UR            | Actinomadura            |

|       |   |       |               |                        |
|-------|---|-------|---------------|------------------------|
| 41368 | 1 | 12732 | CR5           |                        |
| 41369 | 1 | 12796 | CO            | Agrococcus jenensis    |
| 41371 | 2 | 24593 | CO,CR5        | Actinoplanes           |
| 41373 | 4 | 48943 | CO,UR,CR8,CR5 | Microbacterium         |
| 41399 | 1 | 13271 | CO            | Leucobacter            |
| 41425 | 1 | 12061 | CR8           | sfB                    |
| 41428 | 1 | 11631 | UR            | Actinomadura           |
| 41444 | 1 | 11725 | CO            |                        |
| 41456 | 1 | 12858 | UR            | Microbacterium         |
| 41460 | 1 | 12261 | CR5           | Microbacterium         |
| 41462 | 2 | 24454 | UR,CR8        | Microbacterium         |
| 41474 | 2 | 24409 | CR8,CR5       | Microbacterium         |
| 41480 | 1 | 12687 | CO            |                        |
| 41489 | 1 | 11768 | CR5           | Actinoplanes           |
| 41490 | 1 | 13091 | CR8           | Nocardiopsis           |
| 41491 | 3 | 36280 | CO,UR,CR5     | Microbacterium         |
| 41493 | 2 | 23786 | CR8,CR5       | Microbacterium         |
| 41499 | 2 | 23808 | UR,CR8        | Microbacterium         |
| 41500 | 1 | 13258 | CR8           |                        |
| 41502 | 1 | 12580 | CR8           | Dactylosporangium      |
| 41517 | 1 | 12081 | CR8           | Microbacterium         |
| 41531 | 1 | 13008 | CR8           | Nocardiopsis           |
| 41535 | 2 | 25212 | CO,CR8        | Microbacterium         |
| 41542 | 1 | 11896 | UR            | Actinoallomurus spadix |
| 41546 | 3 | 41784 | CO,UR,CR5     | Microbacterium         |
| 41552 | 1 | 12088 | CO            | Actinocorallia         |
| 41578 | 1 | 12204 | CO            | Microbacterium         |
| 41589 | 1 | 12010 | UR            | Actinomadura           |
| 41601 | 1 | 11778 | CR8           | Microbacterium         |
| 41631 | 4 | 51093 | CO,UR,CR8,CR5 |                        |
| 41636 | 2 | 24319 | CO,CR5        | Actinoplanes           |
| 41637 | 1 | 12381 | CO            | Microbacterium         |
| 41639 | 3 | 36873 | CO,UR,CR5     | sfA                    |
| 41652 | 1 | 12391 | CR8           | Nocardiopsis           |
| 41657 | 3 | 38673 | CO,UR,CR5     | Microbacterium         |
| 41712 | 1 | 12416 | CR8           | Microbacterium         |
| 41721 | 2 | 25540 | CR8,CR5       | Microbacterium         |
| 41730 | 1 | 12500 | CO            |                        |
| 41733 | 1 | 11918 | CR8           | Nocardiopsis           |
| 41745 | 4 | 50943 | CO,UR,CR8,CR5 |                        |
| 41749 | 3 | 35053 | CO,UR,CR5     | Microbacterium         |
| 41753 | 2 | 25842 | CR8,CR5       | Microbacterium         |
| 41755 | 2 | 23945 | CO,CR8        | sfA                    |
| 41760 | 1 | 13196 | CO            | Leucobacter            |
| 41770 | 1 | 12958 | CR5           |                        |
| 41779 | 1 | 12176 | CO            |                        |
| 41840 | 4 | 49763 | CO,UR,CR8,CR5 | Microbacterium         |
| 41851 | 1 | 12798 | CR8           |                        |
| 41853 | 1 | 11612 | CR8           | Microbacterium         |
| 41854 | 4 | 48057 | CO,UR,CR8,CR5 | Microbacterium         |

|       |   |       |               |                        |
|-------|---|-------|---------------|------------------------|
| 41868 | 1 | 12853 | CO            |                        |
| 41881 | 4 | 50219 | CO,UR,CR8,CR5 | Microbacterium         |
| 41886 | 4 | 49183 | CO,UR,CR8,CR5 | sfD                    |
| 41900 | 1 | 12147 | CR5           |                        |
| 41904 | 4 | 52934 | CO,UR,CR8,CR5 | Microbacterium         |
| 41908 | 4 | 51074 | CO,UR,CR8,CR5 | Microbacterium         |
| 41923 | 3 | 40277 | CO,UR,CR5     | Arthrobacter           |
| 41925 | 1 | 12951 | CO            |                        |
| 41931 | 1 | 13177 | CO            |                        |
| 41938 | 3 | 36542 | CO,UR,CR8     | Leucobacter            |
| 41946 | 3 | 37975 | CO,UR,CR5     | Microbacterium         |
| 41964 | 1 | 11688 | UR            | Microbacterium aurum   |
| 41978 | 1 | 12935 | CR8           | Agreia                 |
| 41992 | 1 | 12070 | CO            | sfB                    |
| 42004 | 1 | 13007 | CR5           |                        |
| 42038 | 2 | 26417 | CR8,CR5       | Microbacterium         |
| 42065 | 3 | 36474 | CO,UR,CR8     | Microbacterium         |
| 42075 | 3 | 37179 | CO,UR,CR5     | Dactylosporangium      |
| 42081 | 3 | 37615 | CO,UR,CR5     | Nocardiopsis           |
| 42091 | 1 | 13690 | CO            | Mycetocola reblochoni  |
| 42095 | 1 | 12648 | CO            |                        |
| 42097 | 1 | 12149 | CR8           |                        |
| 42104 | 4 | 48890 | CO,UR,CR8,CR5 | Microbacterium         |
| 42129 | 1 | 12397 | UR            | Actinomadura           |
| 42131 | 3 | 38295 | CO,UR,CR5     |                        |
| 42149 | 3 | 39514 | CO,UR,CR5     | Microbacterium         |
| 42150 | 1 | 11713 | CO            |                        |
| 42173 | 1 | 13075 | CR8           | Microbacterium         |
| 42189 | 2 | 23749 | CO,CR8        | sfD                    |
| 42208 | 1 | 11811 | CR8           | Agreia                 |
| 42218 | 1 | 12273 | CR8           | Nocardiopsis           |
| 42236 | 3 | 37582 | CO,UR,CR5     | Microbacterium         |
| 42247 | 1 | 12505 | CO            | Actinocorallia         |
| 42253 | 1 | 11567 | CR8           | Solirubrobacter        |
| 42285 | 1 | 12062 | UR            | Actinoallomurus spadix |
| 42295 | 3 | 38123 | CO,UR,CR5     | Microbacterium         |
| 42310 | 1 | 11820 | UR            | Microbacterium aurum   |
| 42337 | 1 | 12576 | CR5           | Rathayibacter caricis  |
| 42357 | 1 | 12667 | CR5           |                        |
| 42358 | 1 | 12512 | CO            |                        |
| 42400 | 1 | 12024 | CO            | Nonomuraea             |
| 42417 | 1 | 12245 | CR8           | Microbacterium         |
| 42425 | 1 | 12052 | CO            | Dactylosporangium      |
| 42426 | 1 | 11742 | CR8           | Solirubrobacter        |
| 42432 | 2 | 24563 | CO,CR8        | Microbacterium         |
| 42436 | 1 | 12483 | CO            |                        |
| 42470 | 1 | 12082 | CR8           | Solibacillus           |
| 42472 | 1 | 11877 | CR8           | Bacillus psychrodurans |
| 42479 | 4 | 50708 | CO,UR,CR8,CR5 |                        |
| 42497 | 1 | 11753 | CR8           |                        |

|       |   |       |               |                                |
|-------|---|-------|---------------|--------------------------------|
| 42505 | 2 | 24313 | CO,CR8        |                                |
| 42511 | 1 | 14498 | UR            | Enterococcus                   |
| 42514 | 1 | 11721 | UR            | Bacillus                       |
| 42582 | 1 | 11794 | CR8           |                                |
| 42609 | 1 | 12178 | UR            | Bacillus                       |
| 42616 | 1 | 12325 | UR            | Enterococcus                   |
| 42622 | 1 | 12064 | CR8           |                                |
| 42672 | 1 | 11761 | UR            | Bacillus                       |
| 42676 | 1 | 13089 | CR8           |                                |
| 42684 | 1 | 11540 | UR            | Bacillus                       |
| 42694 | 1 | 13307 | CR5           |                                |
| 42706 | 1 | 11683 | UR            |                                |
| 42743 | 1 | 12203 | CO            | Tetragenococcus                |
| 42748 | 1 | 11914 | UR            | Bacillus                       |
| 42814 | 1 | 12379 | CO            | Lactococcus lactis             |
| 42818 | 2 | 26445 | CR8,CR5       |                                |
| 42889 | 1 | 11841 | UR            | Enterococcus                   |
| 42908 | 1 | 11595 | CR8           | Lactococcus lactis             |
| 42933 | 1 | 12585 | UR            | Bacillus                       |
| 42959 | 4 | 52499 | CO,UR,CR8,CR5 |                                |
| 42997 | 1 | 11648 | CR8           |                                |
| 43095 | 1 | 13271 | CR8           | Jeotgalicoccus                 |
| 43227 | 2 | 25484 | CO,CR8        |                                |
| 43361 | 1 | 11661 | UR            | Bacillus                       |
| 43416 | 1 | 12642 | CR5           |                                |
| 43461 | 1 | 11885 | UR            | Bacillus                       |
| 43496 | 1 | 12012 | UR            | Bacillus                       |
| 43507 | 1 | 11565 | UR            | Enterococcus                   |
| 43571 | 1 | 12476 | UR            | Bacillus                       |
| 43697 | 2 | 23293 | CR8,CR5       | Lactococcus lactis             |
| 43705 | 2 | 23560 | CO,CR8        | Bacillus                       |
| 43709 | 1 | 11820 | UR            | Bacillus anthracis             |
| 43740 | 1 | 11721 | UR            | Bacillus                       |
| 43749 | 1 | 13210 | CR5           | Jeotgalicoccus                 |
| 43752 | 1 | 12456 | CR5           | Solibacillus                   |
| 43755 | 1 | 11959 | UR            | Bacillus                       |
| 43780 | 2 | 25765 | CO,CR8        | Gemella                        |
| 43927 | 1 | 11774 | CR5           |                                |
| 43975 | 1 | 12216 | CO            | Enterococcus                   |
| 43982 | 1 | 12136 | UR            | Enterococcus                   |
| 44033 | 1 | 13139 | CR8           | Jeotgalicoccus                 |
| 44057 | 1 | 11681 | UR            | Enterococcus                   |
| 44069 | 1 | 11658 | UR            | Bacillus                       |
| 44151 | 2 | 24391 | CR8,CR5       |                                |
| 44153 | 2 | 24553 | CO,UR         | Streptococcus pseudopneumoniae |
| 44160 | 3 | 37119 | CO,UR,CR5     | Streptococcus                  |
| 44162 | 1 | 12676 | CR8           | Streptococcus                  |
| 44165 | 1 | 12272 | CR8           | Streptococcus                  |
| 44167 | 2 | 23928 | CO,CR5        | Streptococcus                  |
| 44182 | 2 | 24302 | CO,CR8        | Streptococcus                  |

|       |   |       |               |                                |
|-------|---|-------|---------------|--------------------------------|
| 44212 | 4 | 50994 | CO,UR,CR8,CR5 | Streptococcus                  |
| 44221 | 2 | 24872 | CR8,CR5       | Streptococcus                  |
| 44224 | 2 | 24872 | CO,UR         | Streptococcus pseudopneumoniae |
| 44235 | 1 | 12152 | CO            | Clostridium                    |
| 44243 | 2 | 24568 | CO,UR         | Streptococcus pseudopneumoniae |
| 44257 | 3 | 36687 | CO,UR,CR5     | Streptococcus                  |
| 44277 | 3 | 37127 | CO,UR,CR8     | Streptococcus                  |
| 44280 | 2 | 24134 | CO,CR8        | Streptococcus                  |
| 44288 | 1 | 12547 | CR8           | Streptococcus thermophilus     |
| 44299 | 4 | 50198 | CO,UR,CR8,CR5 | Streptococcus                  |
| 44308 | 2 | 24069 | CO,CR8        | Streptococcus                  |
| 44316 | 2 | 24533 | CO,CR8        | Streptococcus                  |
| 44346 | 4 | 49065 | CO,UR,CR8,CR5 | Streptococcus                  |
| 44363 | 3 | 36625 | CO,UR,CR5     | Streptococcus                  |
| 44371 | 1 | 12325 | UR            | Streptococcus sanguinis        |
| 44380 | 1 | 12471 | UR            | Streptococcus                  |
| 44383 | 1 | 12225 | CO            | Streptococcus pseudopneumoniae |
| 44396 | 1 | 11768 | CR8           | Streptococcus                  |
| 44422 | 2 | 23848 | CO,UR         | Streptococcus pseudopneumoniae |
| 44432 | 2 | 23637 | CO,UR         | Streptococcus oralis           |
| 44452 | 3 | 36406 | CO,UR,CR5     | Streptococcus                  |
| 44460 | 1 | 12592 | CR8           | Streptococcus thermophilus     |
| 44466 | 1 | 12233 | CR8           | Streptococcus                  |
| 44482 | 2 | 23985 | CO,UR         | Streptococcus pseudopneumoniae |
| 44501 | 3 | 36162 | CO,UR,CR5     | Streptococcus                  |
| 44511 | 2 | 24908 | CO,CR8        | Streptococcus                  |
| 44516 | 2 | 23957 | CO,CR8        | Streptococcus                  |
| 44533 | 2 | 23993 | CO,CR8        | Streptococcus                  |
| 44534 | 2 | 24115 | CO,UR         | Streptococcus oralis           |
| 44552 | 2 | 24435 | CO,CR8        | Streptococcus                  |
| 44553 | 1 | 11846 | CO            | Streptococcus                  |
| 44554 | 2 | 24097 | CO,CR5        | Streptococcus                  |
| 44562 | 2 | 24276 | CO,UR         | Streptococcus oralis           |
| 44565 | 4 | 49443 | CO,UR,CR8,CR5 | Streptococcus                  |
| 44574 | 3 | 35490 | CO,UR,CR5     | Streptococcus                  |
| 44590 | 2 | 24516 | CO,CR8        | Streptococcus                  |
| 44602 | 1 | 12314 | CR8           | Streptococcus thermophilus     |
| 44604 | 2 | 24615 | CO,CR8        | Streptococcus                  |
| 44608 | 2 | 24139 | CO,CR8        | Streptococcus                  |
| 44612 | 1 | 12918 | CR8           | Streptococcus thermophilus     |
| 44623 | 2 | 23406 | UR,CR8        | Streptococcus                  |
| 44633 | 3 | 35908 | CO,UR,CR5     | Streptococcus                  |
| 44644 | 1 | 11997 | CO            | Streptococcus                  |
| 44647 | 4 | 48523 | CO,UR,CR8,CR5 | Streptococcus                  |
| 44651 | 2 | 23437 | CO,CR8        | Streptococcus                  |
| 44655 | 1 | 12436 | CR8           | Streptococcus thermophilus     |
| 44666 | 1 | 11943 | CR5           | Streptococcus infantis         |
| 44673 | 4 | 48035 | CO,UR,CR8,CR5 | Streptococcus                  |
| 44677 | 1 | 11600 | UR            | Streptococcus pseudopneumoniae |
| 44680 | 2 | 23990 | UR,CR8        | Streptococcus                  |

|       |   |       |               |                                |
|-------|---|-------|---------------|--------------------------------|
| 44681 | 3 | 36198 | CO,UR,CR8     | Streptococcus                  |
| 44688 | 2 | 23361 | UR,CR8        | Streptococcus                  |
| 44702 | 2 | 23263 | CO,UR         | Clostridium                    |
| 44703 | 3 | 37131 | CO,UR,CR5     | Streptococcus                  |
| 44721 | 1 | 13272 | CR5           | Streptococcus                  |
| 44743 | 2 | 24242 | CO,UR         | Streptococcus pseudopneumoniae |
| 44744 | 3 | 35129 | CO,UR,CR5     | Clostridium                    |
| 44745 | 2 | 24582 | CO,UR         | Streptococcus oralis           |
| 44751 | 4 | 48731 | CO,UR,CR8,CR5 | Streptococcus                  |
| 44757 | 1 | 12376 | CO            | Streptococcus                  |
| 44767 | 2 | 24167 | CO,CR8        | Streptococcus                  |
| 44770 | 4 | 47856 | CO,UR,CR8,CR5 | Streptococcus                  |
| 44778 | 2 | 24178 | CO,CR8        | Streptococcus                  |
| 44789 | 2 | 24606 | CO,UR         | Streptococcus pseudopneumoniae |
| 44792 | 4 | 49537 | CO,UR,CR8,CR5 | Streptococcus                  |
| 44813 | 1 | 12123 | CR8           | Streptococcus                  |
| 44816 | 4 | 49252 | CO,UR,CR8,CR5 | Streptococcus                  |
| 44820 | 2 | 23494 | UR,CR8        | Streptococcus                  |
| 44823 | 4 | 49140 | CO,UR,CR8,CR5 | Streptococcus                  |
| 44826 | 3 | 36054 | CO,UR,CR5     | Streptococcus                  |
| 44829 | 3 | 35381 | CO,UR,CR5     | Streptococcus                  |
| 44837 | 1 | 12122 | CR8           | Streptococcus                  |
| 44852 | 1 | 12245 | CR8           | Streptococcus                  |
| 44860 | 4 | 49499 | CO,UR,CR8,CR5 | Streptococcus                  |
| 44884 | 1 | 12309 | CR5           | Streptococcus infantis         |
| 44896 | 4 | 50288 | CO,UR,CR8,CR5 | Streptococcus                  |
| 44904 | 1 | 11728 | CR5           | Streptococcus                  |
| 44910 | 4 | 48301 | CO,UR,CR8,CR5 | Streptococcus                  |
| 44911 | 3 | 36662 | CO,UR,CR5     | Streptococcus                  |
| 44912 | 2 | 23895 | CO,CR8        | Streptococcus                  |
| 44928 | 1 | 12274 | CO            | Streptococcus pseudopneumoniae |
| 44957 | 2 | 24450 | CR8,CR5       | Streptococcus                  |
| 44958 | 3 | 36063 | CO,UR,CR5     | Streptococcus                  |
| 44969 | 2 | 24790 | CO,CR8        | Streptococcus                  |
| 44976 | 1 | 12207 | UR            | Streptococcus                  |
| 44997 | 1 | 12458 | CO            | Streptococcus pseudopneumoniae |
| 45005 | 3 | 36227 | CO,UR,CR5     | Streptococcus                  |
| 45008 | 2 | 24403 | CO,UR         | Streptococcus pseudopneumoniae |
| 45015 | 1 | 11970 | CO            | Streptococcus                  |
| 45016 | 4 | 47486 | CO,UR,CR8,CR5 | Streptococcus                  |
| 45052 | 2 | 25174 | CO,UR         | Streptococcus pseudopneumoniae |
| 45053 | 2 | 24150 | CO,CR8        | Streptococcus                  |
| 45070 | 1 | 12307 | CR8           | Streptococcus thermophilus     |
| 45084 | 1 | 12529 | CR8           | Streptococcus thermophilus     |
| 45097 | 1 | 11617 | CR8           | Streptococcus                  |
| 45101 | 1 | 12310 | CR8           | Streptococcus thermophilus     |
| 45105 | 3 | 35875 | CO,UR,CR5     | Streptococcus                  |
| 45111 | 2 | 23620 | CR8,CR5       | Streptococcus                  |
| 45118 | 4 | 48403 | CO,UR,CR8,CR5 | Streptococcus                  |
| 45130 | 3 | 37574 | CO,UR,CR5     | Streptococcus                  |

|       |   |       |               |                                |
|-------|---|-------|---------------|--------------------------------|
| 45131 | 4 | 48262 | CO,UR,CR8,CR5 | Streptococcus                  |
| 45151 | 1 | 11828 | UR            | Streptococcus pseudopneumoniae |
| 45158 | 4 | 48893 | CO,UR,CR8,CR5 | Streptococcus                  |
| 45161 | 4 | 51537 | CO,UR,CR8,CR5 | Streptococcus                  |
| 45167 | 2 | 24572 | CO,CR8        | Streptococcus                  |
| 45179 | 1 | 12247 | CR8           | Streptococcus                  |
| 45188 | 2 | 25440 | CR8,CR5       | Streptococcus                  |
| 45210 | 3 | 37018 | CO,UR,CR8     | Streptococcus                  |
| 45221 | 1 | 11687 | CR8           | Streptococcus                  |
| 45225 | 1 | 12400 | CR8           | Streptococcus thermophilus     |
| 45228 | 2 | 24312 | CO,CR8        | Streptococcus                  |
| 45230 | 3 | 36361 | CO,UR,CR8     | Streptococcus                  |
| 45238 | 2 | 23981 | CO,CR8        | Streptococcus                  |
| 45246 | 1 | 11641 | CR8           | Streptococcus                  |
| 45269 | 2 | 24630 | CO,UR         | Streptococcus pseudopneumoniae |
| 45286 | 2 | 24529 | CO,UR         | Streptococcus pseudopneumoniae |
| 45297 | 3 | 36931 | CO,UR,CR5     | Streptococcus                  |
| 45299 | 2 | 24408 | CO,UR         | Streptococcus pseudopneumoniae |
| 45300 | 4 | 48331 | CO,UR,CR8,CR5 | Streptococcus                  |
| 45304 | 2 | 24532 | CO,UR         | Streptococcus pseudopneumoniae |
| 45307 | 1 | 12262 | CR8           | Streptococcus thermophilus     |
| 45308 | 2 | 24357 | CO,CR8        | Streptococcus                  |
| 45311 | 3 | 37678 | CO,UR,CR5     | Streptococcus                  |
| 45320 | 4 | 50073 | CO,UR,CR8,CR5 | Streptococcus                  |
| 45321 | 1 | 12448 | CO            | Streptococcus pseudopneumoniae |
| 45324 | 3 | 37315 | CO,UR,CR8     | Streptococcus                  |
| 45326 | 3 | 36393 | CO,UR,CR5     | Streptococcus                  |
| 45343 | 2 | 24424 | CO,UR         | Streptococcus pseudopneumoniae |
| 45350 | 3 | 35565 | CO,UR,CR5     | Streptococcus                  |
| 45352 | 3 | 36297 | CO,UR,CR5     | Streptococcus                  |
| 45357 | 2 | 25164 | CR8,CR5       | Streptococcus                  |
| 45382 | 1 | 12320 | CR8           | Streptococcus thermophilus     |
| 45385 | 3 | 36808 | CO,UR,CR5     | Streptococcus                  |
| 45389 | 1 | 11967 | CR8           | Streptococcus                  |
| 45402 | 2 | 23560 | UR,CR8        | Streptococcus                  |
| 45404 | 3 | 35601 | CO,UR,CR5     | Streptococcus                  |
| 45405 | 1 | 11595 | UR            | Streptococcus                  |
| 45427 | 3 | 36608 | CO,UR,CR5     | Streptococcus                  |
| 45438 | 4 | 51429 | CO,UR,CR8,CR5 | Streptococcus                  |
| 45440 | 2 | 23924 | CO,UR         | Streptococcus pseudopneumoniae |
| 45474 | 1 | 13273 | CO            | Streptococcus                  |
| 45481 | 4 | 48539 | CO,UR,CR8,CR5 | Streptococcus                  |
| 45483 | 2 | 23509 | CO,CR5        | Streptococcus                  |
| 45484 | 1 | 13316 | CR8           | Streptococcus                  |
| 45487 | 1 | 12578 | UR            | Clostridium                    |
| 45493 | 2 | 24310 | CO,CR5        | Streptococcus                  |
| 45500 | 2 | 24014 | CO,CR8        | Streptococcus                  |
| 45507 | 2 | 23845 | CO,UR         | Streptococcus pseudopneumoniae |
| 45508 | 2 | 24753 | CO,UR         | Streptococcus pseudopneumoniae |
| 45513 | 4 | 51124 | CO,UR,CR8,CR5 | Streptococcus                  |

|       |   |       |               |                                |
|-------|---|-------|---------------|--------------------------------|
| 45523 | 4 | 50635 | CO,UR,CR8,CR5 | Streptococcus                  |
| 45529 | 2 | 23704 | UR,CR8        | Streptococcus                  |
| 45531 | 2 | 25302 | CO,CR5        | Streptococcus                  |
| 45536 | 3 | 35829 | CO,UR,CR5     | Streptococcus                  |
| 45542 | 4 | 54161 | CO,UR,CR8,CR5 | Streptococcus sanguinis        |
| 45543 | 1 | 12490 | CO            | Streptococcus pseudopneumoniae |
| 45549 | 2 | 24659 | CO,CR8        | Streptococcus                  |
| 45556 | 1 | 11967 | CR8           | Streptococcus                  |
| 45563 | 4 | 48614 | CO,UR,CR8,CR5 | Streptococcus                  |
| 45564 | 1 | 11767 | CO            | Streptococcus pseudopneumoniae |
| 45578 | 1 | 12306 | CR8           | Streptococcus                  |
| 45587 | 4 | 49940 | CO,UR,CR8,CR5 | Streptococcus                  |
| 45592 | 1 | 11891 | UR            | Streptococcus pseudopneumoniae |
| 45593 | 1 | 12493 | CR8           | Streptococcus thermophilus     |
| 45595 | 1 | 13056 | UR            | Streptococcus sanguinis        |
| 45601 | 2 | 24510 | CO,CR8        | Streptococcus                  |
| 45626 | 3 | 36653 | CO,UR,CR5     | Streptococcus                  |
| 45628 | 3 | 36463 | CO,UR,CR5     | Streptococcus                  |
| 45636 | 2 | 23831 | CO,UR         | Streptococcus pseudopneumoniae |
| 45679 | 4 | 48090 | CO,UR,CR8,CR5 | Streptococcus                  |
| 45682 | 2 | 24311 | UR,CR8        | Streptococcus                  |
| 45694 | 1 | 12188 | CR8           | Streptococcus                  |
| 45695 | 4 | 47817 | CO,UR,CR8,CR5 | Streptococcus                  |
| 45720 | 4 | 48960 | CO,UR,CR8,CR5 | Streptococcus                  |
| 45725 | 1 | 11469 | UR            | Streptococcus                  |
| 45735 | 1 | 12240 | CO            | Clostridium                    |
| 45744 | 4 | 48722 | CO,UR,CR8,CR5 | Streptococcus                  |
| 45762 | 1 | 11657 | CR8           | Streptococcus cristatus        |
| 45786 | 2 | 25295 | CO,UR         | Streptococcus pseudopneumoniae |
| 45803 | 1 | 12496 | CO            | Streptococcus pseudopneumoniae |
| 45828 | 2 | 24177 | CO,CR8        | Streptococcus                  |
| 45837 | 2 | 24203 | CO,CR8        | Streptococcus                  |
| 45844 | 4 | 48844 | CO,UR,CR8,CR5 | Streptococcus                  |
| 45855 | 1 | 12436 | CR8           | Streptococcus                  |
| 45861 | 2 | 23972 | CO,UR         | Clostridium                    |
| 45870 | 4 | 47237 | CO,UR,CR8,CR5 | Streptococcus                  |
| 45878 | 3 | 37634 | CO,UR,CR5     | Streptococcus                  |
| 45879 | 4 | 48196 | CO,UR,CR8,CR5 | Streptococcus                  |
| 45887 | 2 | 24622 | CO,UR         | Streptococcus pseudopneumoniae |
| 45888 | 1 | 12884 | CR8           | Streptococcus cristatus        |
| 45896 | 1 | 12596 | CR8           | Streptococcus                  |
| 45900 | 1 | 13739 | CR8           | Staphylococcus                 |
| 45914 | 2 | 27025 | UR,CR5        | Staphylococcus epidermidis     |
| 45951 | 3 | 40503 | CO,UR,CR5     | Staphylococcus epidermidis     |
| 45953 | 1 | 13416 | CR8           | Staphylococcus epidermidis     |
| 45955 | 2 | 25974 | UR,CR5        | Bacillus flexus                |
| 45974 | 1 | 13143 | CR8           | Staphylococcus                 |
| 45988 | 2 | 25635 | CO,CR8        | Staphylococcus haemolyticus    |
| 46013 | 1 | 13805 | CR8           | Staphylococcus                 |
| 46025 | 1 | 13711 | CR8           | Staphylococcus epidermidis     |

|       |   |       |                   |                             |
|-------|---|-------|-------------------|-----------------------------|
| 46067 | 2 | 26760 | CO,CR8            | Staphylococcus epidermidis  |
| 46074 | 2 | 26339 | UR,CR8            | Staphylococcus              |
| 46079 | 2 | 26762 | UR,CR8            | Brochothrix thermosphacta   |
| 46081 | 1 | 13588 | CR8               | Staphylococcus              |
| 46095 | 1 | 12366 | CR8               | Brochothrix                 |
| 46119 | 1 | 13485 | CR8               | Staphylococcus pettenkoferi |
| 46138 | 1 | 13575 | UR                | Staphylococcus epidermidis  |
| 46157 | 2 | 26060 | CO,CR8            | Staphylococcus              |
| 46162 | 3 | 40108 | CO,UR,CR5         | Staphylococcus epidermidis  |
| 46163 | 1 | 13920 | CR8               | Staphylococcus epidermidis  |
| 46167 | 2 | 27309 | UR,CR8            | Staphylococcus              |
| 46176 | 1 | 13662 | CR8               | Staphylococcus              |
| 46189 | 4 | 54025 | CO,CO_PMA,CR8,CR5 | Staphylococcus epidermidis  |
| 46190 | 3 | 41023 | CO,UR,CR5         | Staphylococcus              |
| 46215 | 2 | 25793 | CO,CR8            | Staphylococcus epidermidis  |
| 46217 | 1 | 13637 | UR                | Staphylococcus epidermidis  |
| 46226 | 1 | 13401 | UR                | Staphylococcus epidermidis  |
| 46228 | 1 | 13553 | CR8               | Staphylococcus              |
| 46243 | 1 | 13372 | CR8               | Staphylococcus epidermidis  |
| 46244 | 1 | 11713 | CO_PMA            | Staphylococcus epidermidis  |
| 46259 | 4 | 48598 | CO,UR,CR8,CR5     | Staphylococcus              |
| 46260 | 1 | 13941 | CR8               | Staphylococcus epidermidis  |
| 46278 | 1 | 13353 | CR8               | Staphylococcus              |
| 46293 | 1 | 12891 | CO                | Staphylococcus epidermidis  |
| 46329 | 1 | 13387 | CR8               | Staphylococcus              |
| 46342 | 1 | 12407 | CO                | Staphylococcus              |
| 46360 | 1 | 12802 | UR                | Staphylococcus              |
| 46362 | 1 | 12717 | UR                | Staphylococcus              |
| 46367 | 1 | 13335 | UR                | Staphylococcus              |
| 46372 | 3 | 37350 | CO,UR,CR5         | Staphylococcus epidermidis  |
| 46398 | 3 | 38257 | CO,UR,CR5         | Staphylococcus haemolyticus |
| 46405 | 1 | 13493 | CR8               | Staphylococcus epidermidis  |
| 46417 | 1 | 13546 | UR                | Staphylococcus epidermidis  |
| 46420 | 2 | 24661 | CO_PMA,CR8_PMA    | Staphylococcus              |
| 46450 | 3 | 39851 | CO,UR,CR8         | Staphylococcus epidermidis  |
| 46451 | 1 | 13618 | CR8               | Staphylococcus epidermidis  |
| 46463 | 1 | 13109 | CO                | Staphylococcus              |
| 46464 | 3 | 40182 | CO,UR,CR8         | Staphylococcus              |
| 46484 | 1 | 12156 | CR8               | Staphylococcus              |
| 46516 | 1 | 12973 | CO                | Staphylococcus epidermidis  |
| 46520 | 1 | 12617 | UR                | Bacillus cytotoxicus        |
| 46527 | 1 | 11499 | CO_PMA            | Staphylococcus              |
| 46532 | 2 | 27173 | UR,CR5            | Staphylococcus              |
| 46539 | 1 | 13134 | CR8               | Staphylococcus              |
| 46548 | 2 | 23764 | CR8,CR5           | Staphylococcus              |
| 46562 | 3 | 41774 | CO,UR,CR5         | Staphylococcus epidermidis  |
| 46568 | 1 | 12272 | CO                | Staphylococcus epidermidis  |
| 46571 | 1 | 13576 | UR                | Staphylococcus epidermidis  |
| 46607 | 2 | 26323 | CO,CR8            | Staphylococcus epidermidis  |
| 46608 | 2 | 27364 | UR,CR8            | Staphylococcus              |

|       |   |       |                      |                             |
|-------|---|-------|----------------------|-----------------------------|
| 46611 | 1 | 13825 | CR8                  | Staphylococcus epidermidis  |
| 46612 | 2 | 26983 | CO,CR8               | Staphylococcus epidermidis  |
| 46621 | 2 | 27109 | UR,CR8               | Staphylococcus              |
| 46645 | 1 | 13176 | CR8                  | Staphylococcus              |
| 46661 | 3 | 38369 | CO,UR,CR5            | Staphylococcus              |
| 46665 | 1 | 12175 | CR8                  | Staphylococcus              |
| 46667 | 1 | 13378 | CO                   | Staphylococcus epidermidis  |
| 46668 | 1 | 11896 | CR5                  | Staphylococcus              |
| 46682 | 2 | 26392 | CO,CR8               | Staphylococcus epidermidis  |
| 46684 | 2 | 27317 | UR,CR8               | Staphylococcus epidermidis  |
| 46706 | 3 | 38165 | CO,UR,CR5            | Staphylococcus haemolyticus |
| 46712 | 1 | 13623 | UR                   | Staphylococcus epidermidis  |
| 46718 | 1 | 12472 | CO                   | Staphylococcus epidermidis  |
| 46720 | 3 | 39797 | CO,UR,CR5            | Staphylococcus              |
| 46733 | 2 | 27930 | CR8,CR5              | Staphylococcus              |
| 46738 | 3 | 37296 | CO,UR,CR5            | Staphylococcus              |
| 46752 | 1 | 13487 | UR                   | Staphylococcus epidermidis  |
| 46766 | 2 | 26802 | UR,CR8               | Staphylococcus              |
| 46779 | 2 | 25508 | CO,CR8               | Staphylococcus epidermidis  |
| 46793 | 1 | 12676 | CO_PMA               | Staphylococcus              |
| 46794 | 1 | 12816 | CR8                  | Staphylococcus epidermidis  |
| 46809 | 2 | 27082 | UR,CR8               | Staphylococcus              |
| 46819 | 1 | 13308 | CR8                  | Staphylococcus epidermidis  |
| 46826 | 1 | 13571 | UR                   | Staphylococcus epidermidis  |
| 46828 | 1 | 13033 | CR8                  | Staphylococcus              |
| 46868 | 1 | 11845 | CO                   | Geobacillus                 |
| 46886 | 3 | 40593 | CO,UR,CR5            | Staphylococcus epidermidis  |
| 46891 | 2 | 27308 | UR,CR5               | Staphylococcus              |
| 46894 | 1 | 12714 | CR8                  | Staphylococcus              |
| 46905 | 2 | 26977 | UR,CR8               | Staphylococcus              |
| 46913 | 3 | 38786 | CO,UR,CR5            | Staphylococcus epidermidis  |
| 46929 | 1 | 13040 | CR8                  | Staphylococcus              |
| 46947 | 1 | 13760 | CR8                  | Staphylococcus              |
| 46963 | 1 | 13597 | CR8                  | Staphylococcus              |
| 46981 | 5 | 64736 | CO,UR,CR8,CR5,CO_PMA | Staphylococcus              |
| 46998 | 1 | 13277 | UR                   | Staphylococcus epidermidis  |
| 47000 | 1 | 12216 | CR8                  | Staphylococcus sciuri       |
| 47019 | 2 | 26832 | UR,CR8               | Staphylococcus              |
| 47034 | 1 | 13650 | CR5                  | Staphylococcus epidermidis  |
| 47078 | 1 | 12007 | CR8                  | Bacillus                    |
| 47101 | 1 | 12571 | CR8                  | Staphylococcus              |
| 47109 | 2 | 27189 | UR,CR8               | Staphylococcus epidermidis  |
| 47114 | 2 | 26722 | CR8,CR5              | Staphylococcus              |
| 47128 | 1 | 13213 | CO                   | Staphylococcus epidermidis  |
| 47129 | 2 | 27096 | UR,CR8               | Staphylococcus              |
| 47130 | 1 | 12852 | CO                   | Staphylococcus epidermidis  |
| 47135 | 3 | 39204 | CO,UR,CR5            | Staphylococcus              |
| 47137 | 1 | 13114 | CR8                  | Staphylococcus epidermidis  |
| 47152 | 1 | 13632 | CR8                  | Staphylococcus              |
| 47173 | 1 | 12958 | CR8                  | Staphylococcus epidermidis  |

|       |   |       |               |                             |
|-------|---|-------|---------------|-----------------------------|
| 47175 | 1 | 13644 | CR5           | Staphylococcus              |
| 47185 | 1 | 13636 | CR8           | Staphylococcus              |
| 47187 | 2 | 25292 | UR,CR8        | Staphylococcus              |
| 47188 | 2 | 26197 | CR8,CR5       | Staphylococcus              |
| 47200 | 2 | 27025 | UR,CR8        | Staphylococcus epidermidis  |
| 47243 | 1 | 13096 | CO            | Staphylococcus              |
| 47246 | 1 | 12887 | CR8           | Staphylococcus              |
| 47248 | 1 | 13299 | CO            | Staphylococcus              |
| 47276 | 2 | 25940 | CO,CR8        | Staphylococcus epidermidis  |
| 47296 | 2 | 27180 | UR,CR8        | Staphylococcus              |
| 47306 | 1 | 13338 | CR8           | Staphylococcus epidermidis  |
| 47320 | 1 | 12874 | CO            | Staphylococcus epidermidis  |
| 47327 | 1 | 13036 | UR            | Staphylococcus              |
| 47333 | 1 | 13856 | CR8           | Staphylococcus epidermidis  |
| 47338 | 2 | 27235 | UR,CR8        | Staphylococcus              |
| 47341 | 1 | 13891 | CR8           | Staphylococcus epidermidis  |
| 47345 | 1 | 12472 | CO            | Staphylococcus epidermidis  |
| 47357 | 2 | 26304 | UR,CR8        | Staphylococcus              |
| 47361 | 1 | 12795 | CO            | Staphylococcus epidermidis  |
| 47419 | 1 | 12346 | CO            | Staphylococcus epidermidis  |
| 47425 | 1 | 12711 | CO            | Staphylococcus epidermidis  |
| 47434 | 1 | 11657 | CR8           | Geobacillus                 |
| 47445 | 3 | 40440 | CO,UR,CR5     | Staphylococcus epidermidis  |
| 47450 | 1 | 11544 | CR8           | Pontibacillus               |
| 47462 | 1 | 13599 | CR8           | Staphylococcus epidermidis  |
| 47476 | 2 | 26153 | CR8,CR5       | Staphylococcus              |
| 47479 | 1 | 13483 | CR8           | Staphylococcus              |
| 47519 | 1 | 13617 | CR8           | Staphylococcus              |
| 47528 | 1 | 11973 | CO_PMA        | Staphylococcus              |
| 47544 | 2 | 27143 | UR,CR8        | Staphylococcus              |
| 47551 | 1 | 12961 | CO            | Staphylococcus epidermidis  |
| 47552 | 2 | 27790 | UR,CR8        | Staphylococcus epidermidis  |
| 47564 | 1 | 12758 | CO            | Staphylococcus epidermidis  |
| 47616 | 4 | 51552 | CO,UR,CR8,CR5 | Staphylococcus epidermidis  |
| 47626 | 2 | 26030 | CR8,CR5       | Staphylococcus              |
| 47628 | 2 | 24716 | CO,CR5        | Geobacillus                 |
| 47638 | 2 | 25646 | CO,CR8        | Staphylococcus haemolyticus |
| 47663 | 2 | 26725 | UR,CR8        | Staphylococcus              |
| 47666 | 1 | 12519 | CO            | Staphylococcus epidermidis  |
| 47672 | 1 | 13157 | CO            | Staphylococcus epidermidis  |
| 47676 | 1 | 13422 | CR8           | Staphylococcus              |
| 47680 | 1 | 13487 | UR            | Staphylococcus epidermidis  |
| 47715 | 2 | 27383 | UR,CR8        | Staphylococcus epidermidis  |
| 47724 | 2 | 27391 | CO,CR8        | Staphylococcus epidermidis  |
| 47728 | 1 | 13460 | UR            | Staphylococcus              |
| 47738 | 1 | 11825 | CR8           | Staphylococcus sciuri       |
| 47756 | 2 | 26618 | CO,CR5        | Staphylococcus epidermidis  |
| 47761 | 1 | 12800 | CO            | Staphylococcus epidermidis  |
| 47766 | 1 | 13143 | CR8           | Staphylococcus              |
| 47792 | 1 | 13185 | CR8           | Staphylococcus epidermidis  |

|       |   |       |                      |                             |
|-------|---|-------|----------------------|-----------------------------|
| 47806 | 5 | 66097 | CO,UR,CR8,CR5,CO_PMA | Staphylococcus epidermidis  |
| 47819 | 2 | 25013 | UR,CO_PMA            | Staphylococcus epidermidis  |
| 47821 | 1 | 13097 | CO                   | Staphylococcus              |
| 47832 | 3 | 39998 | CO,UR,CR5            | Staphylococcus epidermidis  |
| 47841 | 3 | 37634 | CO,UR,CR8            | Staphylococcus              |
| 47862 | 1 | 13671 | CR8                  | Staphylococcus              |
| 47869 | 1 | 13697 | UR                   | Staphylococcus epidermidis  |
| 47878 | 3 | 40634 | CO,UR,CR5            | Staphylococcus epidermidis  |
| 47947 | 2 | 27067 | UR,CR8               | Staphylococcus              |
| 47960 | 1 | 12506 | CR8                  | Brochothrix thermosphacta   |
| 47963 | 2 | 25929 | CO,CR8               | Staphylococcus haemolyticus |
| 47993 | 1 | 13752 | CR5                  | Staphylococcus epidermidis  |
| 48021 | 2 | 23791 | UR,CR5               | Staphylococcus arlettae     |
| 48027 | 1 | 12973 | CO                   | Staphylococcus epidermidis  |
| 48039 | 2 | 25814 | UR,CR8               | Staphylococcus              |
| 48048 | 1 | 13429 | UR                   | Staphylococcus              |
| 48075 | 4 | 51466 | CO,UR,CR8,CR5        | Staphylococcus epidermidis  |
| 48081 | 1 | 13438 | UR                   | Staphylococcus epidermidis  |
| 48083 | 2 | 26820 | UR,CR8               | Staphylococcus epidermidis  |
| 48089 | 1 | 13370 | CR8                  | Staphylococcus haemolyticus |
| 48099 | 1 | 13229 | CR8                  | Staphylococcus epidermidis  |
| 48122 | 1 | 13846 | CR8                  | Staphylococcus epidermidis  |
| 48138 | 1 | 13155 | CR8                  | Staphylococcus              |
| 48156 | 1 | 13239 | CR8                  | Staphylococcus              |
| 48159 | 1 | 13465 | CR8                  | Staphylococcus epidermidis  |
| 48186 | 1 | 13309 | CR8                  | Staphylococcus epidermidis  |
| 48200 | 2 | 26327 | UR,CR8               | Staphylococcus              |
| 48213 | 2 | 26733 | CO,CO_PMA            | Bacillus                    |
| 48215 | 1 | 13204 | CO_PMA               | Bacillus                    |
| 48279 | 2 | 26844 | CO,CO_PMA            | Bacillus                    |
| 48318 | 1 | 12927 | CO_PMA               | Bacillus                    |
| 48364 | 1 | 13171 | CO_PMA               | Bacillus                    |
| 48388 | 1 | 13471 | CO_PMA               | Bacillus                    |
| 48423 | 2 | 26662 | CO,CO_PMA            | Bacillus                    |
| 48440 | 1 | 13247 | CO_PMA               | Bacillus                    |
| 48497 | 2 | 26338 | CO,CO_PMA            | Bacillus                    |
| 48536 | 2 | 27046 | CO,CO_PMA            | Bacillus                    |
| 48581 | 2 | 26582 | CO,CO_PMA            | Bacillus                    |
| 48645 | 1 | 12513 | CO_PMA               | Bacillus                    |
| 48660 | 1 | 12788 | CO_PMA               | Bacillus                    |
| 48662 | 1 | 13373 | CO_PMA               | Bacillus                    |
| 48675 | 1 | 13193 | CO_PMA               | Bacillus                    |
| 48690 | 1 | 11855 | CO_PMA               | Bacillus                    |
| 48691 | 1 | 13274 | CO_PMA               | Bacillus                    |
| 48710 | 1 | 12836 | CO                   | Bacillus                    |
| 48776 | 1 | 12698 | CR8_PMA              | Bacillus                    |
| 48784 | 1 | 12851 | CO_PMA               | Bacillus                    |
| 48805 | 1 | 13152 | CO_PMA               | Bacillus                    |
| 48819 | 2 | 25698 | CO,CO_PMA            | Bacillus                    |
| 48821 | 2 | 26949 | CO,CO_PMA            | Bacillus                    |

|       |   |       |           |                                       |
|-------|---|-------|-----------|---------------------------------------|
| 48825 | 1 | 11817 | CO_PMA    | Bacillus                              |
| 48830 | 2 | 26537 | UR,CR5    |                                       |
| 48851 | 1 | 13156 | CO_PMA    | Bacillus                              |
| 48861 | 1 | 13016 | CO_PMA    | Bacillus                              |
| 48912 | 1 | 11896 | CR5       | Desulfotomaculum                      |
| 48936 | 2 | 25491 | CO,CO_PMA | Bacillus                              |
| 48975 | 1 | 12973 | CO_PMA    | Bacillus                              |
| 48981 | 1 | 12819 | CO_PMA    | Bacillus                              |
| 49022 | 1 | 13029 | CO_PMA    | Bacillus                              |
| 49050 | 1 | 12530 | CO_PMA    | Bacillus                              |
| 49052 | 2 | 26593 | CO,CO_PMA | Bacillus                              |
| 49101 | 1 | 12163 | CO        | Thermoanaerobacterium saccharolyticum |
| 49107 | 1 | 12819 | CO_PMA    | Bacillus                              |
| 49129 | 1 | 13591 | CO_PMA    | Bacillus                              |
| 49160 | 1 | 13405 | CO_PMA    | Bacillus                              |
| 49167 | 2 | 26746 | CO,CO_PMA | Bacillus                              |
| 49168 | 1 | 13148 | CO_PMA    | Bacillus                              |
| 49172 | 1 | 13538 | CO_PMA    | Bacillus                              |
| 49178 | 2 | 27334 | CO,CO_PMA | Bacillus                              |
| 49187 | 2 | 26831 | CO,CO_PMA | Bacillus                              |
| 49213 | 1 | 11725 | CO        | Desulfotomaculum                      |
| 49214 | 1 | 13583 | CO_PMA    | Bacillus                              |
| 49265 | 1 | 13419 | CO_PMA    | Bacillus                              |
| 49268 | 2 | 26440 | CO,CO_PMA | Bacillus                              |
| 49305 | 1 | 12680 | CO_PMA    | Bacillus                              |
| 49312 | 1 | 11787 | CO        | Bacillus                              |
| 49322 | 1 | 12183 | CR8_PMA   | Bacillus                              |
| 49325 | 2 | 26619 | CO,CO_PMA | Bacillus                              |
| 49357 | 1 | 13373 | CO_PMA    | Bacillus                              |
| 49365 | 1 | 13631 | CO_PMA    | Bacillus                              |
| 49366 | 1 | 13371 | CO_PMA    | Bacillus                              |
| 49395 | 2 | 26565 | CO,CO_PMA | Bacillus                              |
| 49397 | 1 | 12999 | CR5       | Thermicanus                           |
| 49446 | 2 | 27046 | CO,CO_PMA | Bacillus                              |
| 49493 | 2 | 26856 | CO,CO_PMA | Bacillus                              |
| 49495 | 1 | 13413 | CO_PMA    | Bacillus                              |
| 49516 | 1 | 12712 | CR8       | Bacillus acidicola                    |
| 49532 | 2 | 25412 | CO,CO_PMA | Bacillus                              |
| 49591 | 1 | 13709 | CO_PMA    | Bacillus                              |
| 49623 | 1 | 13216 | CO_PMA    | Bacillus                              |
| 49637 | 2 | 27233 | CO,CO_PMA | Bacillus                              |
| 49665 | 1 | 11806 | CR8       | Bacillus acidicola                    |
| 49669 | 1 | 13062 | CO_PMA    | Bacillus                              |
| 49688 | 1 | 12845 | CO_PMA    | Bacillus                              |
| 49766 | 1 | 13421 | CO        | Bacillus                              |
| 49864 | 1 | 12941 | CO_PMA    | Bacillus                              |
| 49874 | 1 | 12003 | CO_PMA    | Bacillus                              |
| 49912 | 1 | 13176 | CO_PMA    | Bacillus                              |
| 49937 | 1 | 13563 | CO_PMA    | Bacillus                              |
| 49990 | 2 | 24741 | CO,CR8    | Veillonella                           |

|       |   |       |                                      |                             |
|-------|---|-------|--------------------------------------|-----------------------------|
| 50031 | 2 | 24974 | CR8,CR5                              | Paenibacillus               |
| 50043 | 1 | 11723 | CO                                   | Veillonella                 |
| 50073 | 1 | 11880 | CO                                   | Veillonella                 |
| 50100 | 1 | 11643 | CR8                                  | Paenibacillus               |
| 50102 | 2 | 24220 | CO,CR8                               | Paenibacillus               |
| 50179 | 1 | 13058 | CR8                                  | Paenibacillus               |
| 50184 | 1 | 12641 | CR5                                  | Collinsella aerofaciens     |
| 50382 | 1 | 12298 | CR8                                  | Paenibacillus               |
| 50392 | 1 | 12794 | CR8                                  | Paenibacillus               |
| 50464 | 2 | 24918 | CO,CR8                               | Veillonella                 |
| 50477 | 1 | 12420 | CR5                                  | Collinsella aerofaciens     |
| 50564 | 1 | 12894 | CO                                   |                             |
| 50569 | 2 | 24271 | CO,CR8                               | Veillonella                 |
| 50574 | 1 | 11930 | CO                                   | Veillonella dispar          |
| 50648 | 1 | 12225 | CR8                                  | Paenibacillus               |
| 50707 | 2 | 24821 | CO,CR8                               | Veillonella                 |
| 50725 | 2 | 23280 | CO,CR8                               | Veillonella                 |
| 50779 | 1 | 11394 | CR8_PMA                              | Paenibacillus               |
| 50847 | 2 | 23884 | CO,CR5                               | Collinsella aerofaciens     |
| 50857 | 1 | 12428 | CR8                                  | Paenibacillus               |
| 50864 | 1 | 13552 | CR5                                  | Adlercreutzia               |
| 50911 | 1 | 12707 | CR5                                  | Paenibacillus               |
| 51048 | 1 | 11946 | CR8                                  |                             |
| 51431 | 1 | 12040 | CO                                   | sfF                         |
| 51571 | 1 | 12088 | CO                                   | sfA                         |
| 51676 | 1 | 12945 | CR5                                  |                             |
| 51836 | 3 | 39653 | CO,UR,CR5                            | sfF                         |
| 51890 | 1 | 13778 | CR8                                  |                             |
| 51929 | 1 | 11941 | CO                                   |                             |
| 51982 | 1 | 13397 | CR8                                  |                             |
| 52142 | 1 | 12072 | CR8                                  |                             |
| 52201 | 1 | 13386 | CR8                                  | HN1-15                      |
| 52294 | 1 | 11877 | CR8                                  | sfC                         |
| 52305 | 1 | 11998 | UR                                   | Roseiflexus                 |
| 52341 | 1 | 12251 | CR8                                  | sfAT                        |
| 52380 | 1 | 11769 | CR8                                  | Syntrophus                  |
| 52401 | 2 | 24890 | CO,CR8                               |                             |
| 52457 | 1 | 12155 | CO                                   | sfC                         |
| 52703 | 1 | 11523 | CR8                                  | Desulfobacterium            |
| 52737 | 1 | 11812 | CO                                   | sfE                         |
| 52805 | 1 | 11813 | CR5                                  | HN1-15                      |
| 52824 | 0 | 0     | COURCR8CR5CO_PMAUR_PMACR8_PMACR5_PMA |                             |
| 52843 | 1 | 12482 | CR8                                  | sfD                         |
| 52935 | 1 | 13210 | CR5                                  | Chroococcidiopsis           |
| 53292 | 1 | 12412 | CO                                   | Anabaena                    |
| 53368 | 2 | 24003 | CO,CR8                               | Fischerella muscicola       |
| 53583 | 1 | 12029 | CO                                   | Aphanizomenon issatschenkoi |
| 53672 | 1 | 12785 | CO                                   | Halomicronema               |
| 53678 | 2 | 25875 | CR8,CR5                              | Phormidium animale          |
| 53679 | 1 | 12312 | CR5                                  | Deinococcus                 |

|       |   |       |                |                              |
|-------|---|-------|----------------|------------------------------|
| 53690 | 1 | 11973 | CR5_PMA        | A4b                          |
| 53704 | 1 | 12016 | CO             |                              |
| 53750 | 1 | 12521 | CR8            | Deinococcus                  |
| 53818 | 1 | 11986 | CO             | Symploca                     |
| 53827 | 1 | 13152 | CO             | Deinococcus                  |
| 53955 | 2 | 25889 | UR,CR8         | sfB                          |
| 53967 | 2 | 25335 | CR8,CR5        | sfB                          |
| 54147 | 1 | 12150 | CR5            |                              |
| 54344 | 1 | 12186 | CO_PMA         | SHAG537                      |
| 54684 | 1 | 13169 | CR5            |                              |
| 54850 | 1 | 12133 | CO             |                              |
| 54955 | 2 | 24180 | CO,CR8         | HA73                         |
| 55241 | 1 | 11704 | CR8            |                              |
| 55347 | 2 | 25426 | CO,CR8         |                              |
| 55518 | 1 | 13217 | CO             |                              |
| 55774 | 1 | 12582 | CO             |                              |
| 55906 | 1 | 11537 | CR8            |                              |
| 56113 | 1 | 13119 | CO             |                              |
| 56168 | 1 | 12366 | CO             | sfB                          |
| 56623 | 1 | 12435 | CO             |                              |
| 56900 | 1 | 12992 | CO_PMA         |                              |
| 57019 | 1 | 11877 | CO             |                              |
| 57308 | 1 | 12503 | CR8            | Isosphaera                   |
| 57341 | 1 | 12354 | CR8            | Desulfovibrio putealis       |
| 57357 | 4 | 52622 | CO,UR,CR8,CR5  | Planctomyces                 |
| 57583 | 3 | 36177 | CO,UR,CR5      |                              |
| 57616 | 1 | 12717 | CO             |                              |
| 57707 | 1 | 12209 | CO             |                              |
| 57878 | 1 | 12297 | CR5            | Gemmatimonas                 |
| 57982 | 2 | 26638 | CR8,CR5_PMA    | sfM                          |
| 58114 | 1 | 11983 | CO             | Cystobacter minus            |
| 58123 | 1 | 13022 | CR5            |                              |
| 58316 | 1 | 12342 | CR5            | sfA                          |
| 58369 | 2 | 24095 | CO,CR5         |                              |
| 58422 | 1 | 12126 | CO             | sfA                          |
| 58435 | 2 | 27111 | CO_PMA,CR8_PMA |                              |
| 58446 | 2 | 23922 | CO,CR8         | Cystobacter minus            |
| 58484 | 1 | 12626 | CR5            | sfF                          |
| 58534 | 2 | 24108 | CO,CR8         | sfG                          |
| 58535 | 1 | 12502 | CO             |                              |
| 58556 | 1 | 11866 | CO             | Anaeromyxobacter sp. Fw109-5 |
| 58567 | 3 | 38739 | CO,UR,CR5      |                              |
| 58579 | 1 | 12807 | CO             | sfC                          |
| 58588 | 1 | 12352 | CR5            |                              |
| 58597 | 1 | 12406 | CO             | sfC                          |
| 58619 | 1 | 13227 | CO             |                              |
| 58625 | 2 | 24658 | CO,CR8         |                              |
| 58646 | 1 | 12482 | CO             | sfD                          |
| 58667 | 1 | 11886 | CO             | sfA                          |
| 58691 | 1 | 11751 | CO             | Archangium                   |

|       |   |       |                 |                             |
|-------|---|-------|-----------------|-----------------------------|
| 58706 | 1 | 11611 | CR8             | Myxococcus                  |
| 58728 | 1 | 11944 | CR5             | sfF                         |
| 58818 | 1 | 12184 | CR5             | sfA                         |
| 58886 | 2 | 24655 | CO,CR8          | Methylobacterium            |
| 58889 | 1 | 12244 | CR8             | Bosea                       |
| 58959 | 2 | 23319 | UR,CR8          | Mycoplana                   |
| 58971 | 3 | 38453 | CO,UR,CR8       | Brevundimonas diminuta      |
| 58976 | 1 | 12983 | CR8             | Bradyrhizobium canariense   |
| 58982 | 2 | 23362 | CO,CR8          | Brevundimonas               |
| 58987 | 1 | 12954 | UR              | Brevundimonas diminuta      |
| 58993 | 1 | 13402 | CR5_PMA         | Bradyrhizobium elkanii      |
| 59027 | 1 | 12273 | CO              |                             |
| 59047 | 1 | 12124 | CR5             | Rhodoplanes                 |
| 59053 | 1 | 12959 | CR8             |                             |
| 59062 | 2 | 26033 | UR,CR8          | Brevundimonas               |
| 59070 | 1 | 12526 | CO              | sfA                         |
| 59071 | 1 | 11912 | CO              | Brevundimonas diminuta      |
| 59087 | 1 | 11892 | CR8             | Methylobacterium adhaesivum |
| 59105 | 1 | 11768 | CO              |                             |
| 59127 | 2 | 25820 | CO,CR8          |                             |
| 59143 | 2 | 24564 | CR8_PMA,CR5_PMA | Bradyrhizobium              |
| 59158 | 1 | 12009 | CR8             | Brevundimonas diminuta      |
| 59178 | 2 | 25607 | UR,CR8          | Brevundimonas               |
| 59195 | 1 | 12148 | CO              | Brevundimonas diminuta      |
| 59196 | 1 | 12827 | CR8             | Brevundimonas diminuta      |
| 59198 | 2 | 25628 | CO,CR8          |                             |
| 59212 | 1 | 11672 | CO              | Methylobacterium zatmanii   |
| 59224 | 1 | 12589 | CR5             | Rhodoplanes                 |
| 59247 | 3 | 35332 | CO,UR,CR5       | Methylobacterium            |
| 59259 | 2 | 24035 | CO,CR8          | Methylobacterium komagatae  |
| 59279 | 2 | 25967 | CO,CR8          |                             |
| 59284 | 1 | 12274 | CO              | Brevundimonas diminuta      |
| 59299 | 1 | 12394 | CO              |                             |
| 59317 | 1 | 12156 | CO              | Brevundimonas diminuta      |
| 59318 | 2 | 24177 | CR8,CR5         | Mycoplana                   |
| 59321 | 1 | 11750 | CO              | Caulobacter                 |
| 59322 | 1 | 12164 | CR8             | Bosea                       |
| 59373 | 1 | 12802 | CR8             |                             |
| 59396 | 1 | 11675 | CO              | sfA                         |
| 59404 | 3 | 35104 | CO,UR,CR5       | Methylobacterium            |
| 59410 | 1 | 11848 | CR8             | Methylobacterium            |
| 59417 | 1 | 11655 | CR8             | Methylobacterium            |
| 59420 | 2 | 24816 | CO,CR8          | Methylobacterium komagatae  |
| 59421 | 2 | 25782 | CO,CR5          |                             |
| 59454 | 2 | 27106 | CO,CR8          |                             |
| 59463 | 2 | 25845 | CO,UR           | Brevundimonas diminuta      |
| 59486 | 1 | 11956 | CO              | Bradyrhizobium              |
| 59524 | 1 | 13190 | CR8_PMA         |                             |
| 59547 | 1 | 12773 | CR5             | Methylobacterium            |
| 59549 | 1 | 11726 | CR8             | Methylobacterium            |

|       |   |       |                   |                                |
|-------|---|-------|-------------------|--------------------------------|
| 59551 | 1 | 12493 | CR8               | Methylobacterium               |
| 59560 | 4 | 50130 | CO,CO_PMA,CR8,CR5 | Methylobacterium               |
| 59566 | 2 | 26231 | CO,CR8            |                                |
| 59571 | 3 | 35818 | CO,UR,CR5         | Methylobacterium               |
| 59578 | 1 | 11535 | CR8               |                                |
| 59636 | 1 | 12410 | CO                | Bradyrhizobium                 |
| 59710 | 1 | 11816 | CO                | Methylobacterium               |
| 59718 | 1 | 12001 | CO                | Methylobacterium zatmanii      |
| 59725 | 3 | 38254 | CO,UR,CR5         | Methylobacterium               |
| 59740 | 3 | 35692 | CO,UR,CR8         | Brevundimonas                  |
| 59754 | 1 | 11767 | CO                | Methylobacterium               |
| 59755 | 1 | 11993 | CR8               |                                |
| 59760 | 3 | 37187 | CO,UR,CR8         |                                |
| 59786 | 2 | 24758 | CO,CR8            | Methylobacterium fujisawaense  |
| 59791 | 1 | 12253 | CO                | Methylobacterium               |
| 59792 | 1 | 12367 | CO_PMA            |                                |
| 59796 | 1 | 11722 | CR5               | Methylobacterium radiotolerans |
| 59826 | 1 | 11904 | CO                | Methylosinus sporium           |
| 59837 | 3 | 37433 | CO,UR,CR5         | Skermanella                    |
| 59875 | 4 | 51131 | CO,UR,CR8,CR5     | Brevundimonas                  |
| 59890 | 1 | 11804 | CO                | Methylobacterium fujisawaense  |
| 59903 | 2 | 24822 | CO,CR8            | Methylobacterium komagatae     |
| 59904 | 2 | 25073 | CO,CR8            | Methylobacterium               |
| 59915 | 4 | 52135 | CO,CO_PMA,CR8,CR5 | Methylobacterium               |
| 59935 | 2 | 24399 | UR,CR8            | Bosea                          |
| 59959 | 1 | 12717 | CO                | Caulobacter                    |
| 59960 | 1 | 12494 | CO                | Brevundimonas diminuta         |
| 59983 | 1 | 12022 | CO                | Bradyrhizobium                 |
| 59989 | 2 | 28391 | CO_PMA,CR8_PMA    | Afipia broomeae                |
| 60010 | 1 | 12948 | UR                |                                |
| 60031 | 2 | 24437 | CO,CR8            |                                |
| 60042 | 1 | 14106 | CO_PMA            | Afipia                         |
| 60050 | 2 | 24451 | CO,CR8            |                                |
| 60065 | 1 | 12116 | CO                | Brevundimonas diminuta         |
| 60071 | 2 | 25773 | CO,CR8            |                                |
| 60072 | 2 | 24008 | UR,CR8            | Brevundimonas                  |
| 60100 | 2 | 23760 | CO,CR8            | Brevundimonas                  |
| 60105 | 1 | 11583 | CR8               | Skermanella                    |
| 60119 | 4 | 49392 | CO,UR,CR8,CR5     | Brevundimonas                  |
| 60205 | 3 | 36959 | CO,UR,CR5         | Sphingomonas wittichii         |
| 60211 | 2 | 23123 | CO_PMA,CR8_PMA    | Rhodoplanes                    |
| 60231 | 1 | 11830 | CR8               | Roseomonas                     |
| 60246 | 2 | 24965 | CR8,CR5           | Novosphingobium                |
| 60278 | 1 | 12120 | CO                | Sphingomonas wittichii         |
| 60279 | 1 | 12071 | UR                |                                |
| 60281 | 4 | 51370 | CO,UR,CR8,CR5     | Sphingomonas                   |
| 60291 | 1 | 12132 | CR8               | Sphingobium                    |
| 60301 | 1 | 11764 | CO                | Sphingobium                    |
| 60307 | 1 | 11854 | CR5               | Sphingomonas asaccharolytica   |
| 60315 | 5 | 61826 |                   | Sphingomonas                   |

|       |   |       |                        |                             |
|-------|---|-------|------------------------|-----------------------------|
| 60328 | 1 | 12051 | CR8                    | Devosia                     |
| 60332 | 1 | 12147 | CO_PMA                 | Sphingobium                 |
| 60346 | 1 | 11607 | CR8                    | Novosphingobium             |
| 60348 | 3 | 40032 | CR5,CO_PMA,CR8_PMA     | Sphingomonas                |
| 60351 | 2 | 23315 | CO,CR8                 | Sphingomonas                |
| 60374 | 2 | 25385 | CR8,CR5                | Sphingobium herbicidovorans |
| 60378 | 3 | 38603 | CO,UR,CR5              |                             |
| 60395 | 3 | 38305 | CR8,CO_PMA,CR8_PMA     | Sphingobium                 |
| 60398 | 2 | 24228 | CO_PMA,CR8_PMA         | Sphingomonas                |
| 60405 | 3 | 36320 | CO,UR,CR5              |                             |
| 60421 | 1 | 12227 | CR8_PMA                | Sphingobium                 |
| 60425 | 1 | 1     | CR5_PMA                |                             |
| 60430 | 1 | 11969 | CR8                    | Sphingomonas wittichii      |
| 60447 | 1 | 11765 | CR8                    | Novosphingobium             |
| 60449 | 1 | 11943 | CO                     | Sphingomonas                |
| 60467 | 3 | 39592 | CO,UR,CR5              | Roseomonas                  |
| 60472 | 1 | 12846 | CR8                    | Devosia                     |
| 60475 | 3 | 38465 | CO,UR,CR5              | Roseomonas                  |
| 60492 | 1 | 11714 | CO                     |                             |
| 60523 | 3 | 40082 | CO,UR,CR5              |                             |
| 60538 | 1 | 12421 | UR                     | Sphingobium                 |
| 60557 | 1 | 12421 | UR                     | Sphingobium                 |
| 60560 | 2 | 23727 | CO,CR8                 | Oceanicaulis                |
| 60564 | 1 | 11733 | CR5                    | Sphingomonas                |
| 60565 | 1 | 11528 | UR                     | Erythrobacter               |
| 60568 | 1 | 12338 | CO_PMA                 | Sphingomonas                |
| 60579 | 2 | 23772 | CO_PMA,CR8_PMA         | Sphingobium                 |
| 60608 | 1 | 12403 | CR8                    | Novosphingobium             |
| 60638 | 1 | 12556 | CR8                    | Novosphingobium             |
| 60672 | 2 | 24258 | CO,CR8                 | Sphingomonas                |
| 60697 | 1 | 11763 | UR                     | Sphingopyxis                |
| 60732 | 4 | 50432 | CR8,CR5,CO_PMA,CR8_PMA | Sphingobium                 |
| 60741 | 2 | 24161 | CO,UR                  | sfZ                         |
| 60758 | 1 | 12008 | CR8                    | Sphingomonas                |
| 60769 | 1 | 11805 | CO                     | Novosphingobium             |
| 60770 | 1 | 11769 | CO_PMA                 | Sphingomonas                |
| 60808 | 2 | 25997 | CO,CR5                 | Novosphingobium             |
| 60822 | 1 | 12438 | UR                     | Sphingobium                 |
| 60826 | 1 | 12131 | CO_PMA                 | Sphingomonas                |
| 60827 | 4 | 50477 |                        | Sphingomonas                |
| 60837 | 3 | 36293 | CO,UR,CR5              | Novosphingobium             |
| 60840 | 1 | 11828 | CO                     |                             |
| 60851 | 1 | 11892 | CO                     | Roseomonas                  |
| 60858 | 1 | 11623 | CR5                    | Sphingomonas                |
| 60902 | 1 | 11444 | CO_PMA                 | Sphingobium                 |
| 60910 | 1 | 12369 | CO                     |                             |
| 60916 | 2 | 25481 | CO,CR5                 | Kaistobacter                |
| 60926 | 1 | 12743 | CO                     |                             |
| 60931 | 1 | 12597 | CO_PMA                 | Sphingomonas                |
| 60961 | 1 | 12280 | CO                     | Novosphingobium             |

|       |   |       |                              |                                   |
|-------|---|-------|------------------------------|-----------------------------------|
| 60966 | 1 | 12317 | CR8                          | Sphingomonas                      |
| 60970 | 1 | 11765 | CO_PMA                       | Sphingobium                       |
| 61013 | 3 | 38693 | CO,UR,CR5                    | Sphingobium                       |
| 61046 | 1 | 12048 | CR8                          | Novosphingobium                   |
| 61060 | 3 | 37640 | CO_PMA,CR8_PMA,CR5_PMA       | Caulobacter leidyia               |
| 61062 | 2 | 24005 | CO,CR8                       | Sphingomonas                      |
| 61082 | 2 | 24146 | CO,CR5                       | Acidisphaera                      |
| 61087 | 1 | 13145 | CO                           | Sphingomonas                      |
| 61094 | 2 | 26626 | CO,UR                        |                                   |
| 61101 | 1 | 12289 | UR                           | Sphingobium                       |
| 61102 | 1 | 11774 | CO_PMA                       | Novosphingobium resinovorum       |
| 61105 | 3 | 36764 | CO,UR,CR8                    |                                   |
| 61106 | 1 | 12469 | CR8                          | Sphingomonas yabuuchiae           |
| 61127 | 1 | 12292 | CO_PMA                       | Sphingobium                       |
| 61133 | 3 | 35731 | CO,UR,CR5                    | Novosphingobium                   |
| 61158 | 5 | 62564 | UR,CR8,CO_PMA,UR_PMA,CR8_PMA | Sphingomonas                      |
| 61191 | 3 | 36925 | CO,UR,CR5                    | Sphingomonas                      |
| 61277 | 1 | 11944 | CR8                          |                                   |
| 61285 | 1 | 12006 | CR8                          | Devosia                           |
| 61290 | 1 | 11746 | CO                           | Sphingobium                       |
| 61302 | 3 | 36253 | CR8,CO_PMA,CR8_PMA           | Sphingobium                       |
| 61317 | 1 | 12861 | UR                           |                                   |
| 61325 | 1 | 12813 | CR5                          |                                   |
| 61327 | 2 | 23884 | CO_PMA,CR8_PMA               | Sphingobium                       |
| 61333 | 1 | 11811 | CO_PMA                       |                                   |
| 61336 | 1 | 12017 | CO                           | Sphingomonas                      |
| 61355 | 3 | 38669 | CO,UR,CR5                    | Novosphingobium                   |
| 61385 | 1 | 12087 | CO                           | Rhizobium                         |
| 61473 | 3 | 38711 | CO,UR,CR5                    | Rubellimicrobium                  |
| 61538 | 1 | 11845 | CO                           | sfA                               |
| 61557 | 1 | 11866 | CO                           | Nordella                          |
| 61612 | 1 | 13008 | CO                           |                                   |
| 61677 | 1 | 13251 | CR8                          | Rubellimicrobium                  |
| 61693 | 1 | 12427 | CO                           | Agrobacterium rubi                |
| 61699 | 1 | 13320 | CO                           |                                   |
| 61764 | 1 | 12832 | CO                           | Rhizobium                         |
| 61774 | 1 | 12049 | CO                           | Rhizobium                         |
| 61785 | 1 | 12201 | UR                           | Agrobacterium                     |
| 61810 | 1 | 12886 | CO                           | Rhizobium                         |
| 61835 | 1 | 13260 | CR5                          | Rubellimicrobium                  |
| 61909 | 4 | 51899 | CO,UR,CR8,CR5                | Paracoccus aminovorans            |
| 61913 | 1 | 12070 | CO                           | Rhizobium                         |
| 61935 | 1 | 11484 | UR                           | Shinella                          |
| 61965 | 3 | 39310 | CO,CO_PMA,CR8                | Paracoccus                        |
| 61966 | 1 | 13120 | CO                           |                                   |
| 61984 | 1 | 11708 | CR8                          | Paracoccus                        |
| 62019 | 1 | 12797 | CO                           |                                   |
| 62086 | 1 | 11861 | CR8                          | Candidatus Liberibacter africanus |
| 62194 | 1 | 12427 | CO_PMA                       |                                   |
| 62220 | 1 | 11663 | CO_PMA                       | Paracoccus                        |

|       |   |       |                 |                        |
|-------|---|-------|-----------------|------------------------|
| 62280 | 1 | 13206 | CO              | Paracoccus             |
| 62320 | 1 | 12087 | CO              | Rhizobium              |
| 62348 | 1 | 13252 | CO              | Paracoccus             |
| 62371 | 1 | 12227 | CO_PMA          | Paracoccus             |
| 62391 | 1 | 12725 | CO              | Nautella italica       |
| 62417 | 1 | 12631 | CO              |                        |
| 62419 | 1 | 11975 | CO              | Rhizobium              |
| 62424 | 1 | 12691 | CO              | Rhizobium              |
| 62439 | 2 | 24266 | CO,CR5          | Rhizobium              |
| 62450 | 1 | 13108 | CO              | Rhizobium              |
| 62476 | 2 | 27058 | CO,CR8          | Paracoccus             |
| 62483 | 2 | 2     | CR8_PMA,CR5_PMA |                        |
| 62496 | 2 | 25254 | CO,CO_PMA       |                        |
| 62512 | 1 | 12153 | CO              | Agrobacterium rubi     |
| 62521 | 1 | 11849 | CR8             | Paracoccus aminovorans |
| 62538 | 1 | 12500 | CO              |                        |
| 62578 | 1 | 11694 | CO_PMA          |                        |
| 62585 | 1 | 13139 | CR8             | Paracoccus yeei        |
| 62664 | 2 | 26935 | CO,UR           | sfA                    |
| 62669 | 1 | 12090 | CO              | Rhizobium              |
| 62719 | 1 | 12276 | CR8             | Paracoccus             |
| 62724 | 1 | 11676 | CO              |                        |
| 62734 | 1 | 13415 | CR8             | Paracoccus             |
| 62760 | 1 | 12302 | CO              | Rhizobium              |
| 62769 | 1 | 12723 | CR5             | Paracoccus aminovorans |
| 62790 | 1 | 12321 | CO              |                        |
| 62812 | 1 | 11918 | CO              | Rhizobium              |
| 62819 | 1 | 12130 | CO              |                        |
| 62825 | 2 | 24549 | CO,CR8          | Rubellimicrobium       |
| 62853 | 1 | 12806 | CR8             |                        |
| 62890 | 1 | 12316 | CR8             | Paracoccus             |
| 62927 | 1 | 11664 | CR8             |                        |
| 63093 | 1 | 13161 | CR8             |                        |
| 63161 | 1 | 11766 | UR              | Chryseobacterium       |
| 63182 | 1 | 12518 | UR              |                        |
| 63187 | 1 | 11933 | CO              | Chryseobacterium       |
| 63286 | 1 | 12329 | CR8             | Chryseobacterium       |
| 63336 | 1 | 12522 | CR8             |                        |
| 63400 | 1 | 11835 | CR5             | Chryseobacterium       |
| 63573 | 3 | 39301 | CO,UR,CR5       | Chryseobacterium       |
| 63711 | 1 | 12149 | UR              | Chryseobacterium       |
| 63864 | 2 | 25030 | CR8,CR5         | Chryseobacterium       |
| 64220 | 2 | 25144 | CR8,CR5         | Chryseobacterium       |
| 64568 | 2 | 24912 | CO,CR8          |                        |
| 64623 | 1 | 11875 | CR5             | Chryseobacterium       |
| 64654 | 1 | 11751 | CO              | Chryseobacterium       |
| 64734 | 1 | 12371 | CR5             | Chryseobacterium       |
| 64986 | 1 | 12015 | CR8             | Chryseobacterium       |
| 65050 | 1 | 11923 | CR8             | Chryseobacterium       |
| 65435 | 1 | 12410 | CR8             | Chryseobacterium       |

|       |   |       |           |                          |
|-------|---|-------|-----------|--------------------------|
| 65635 | 1 | 12926 | CR8       | Chryseobacterium         |
| 65807 | 1 | 12724 | CR8       | Chryseobacterium         |
| 65875 | 2 | 25512 | CR8,CR5   |                          |
| 65912 | 1 | 11894 | CO        | Flavobacterium           |
| 66457 | 1 | 12322 | UR        | Wautersiella             |
| 66513 | 1 | 12685 | UR        | Wautersiella             |
| 66605 | 2 | 24064 | CO,CR8    | Flavobacterium columnare |
| 66715 | 2 | 24424 | CR8,CR5   | Flavobacterium           |
| 66896 | 1 | 12297 | UR        | Sphingobacterium         |
| 67028 | 1 | 11625 | CR8       | Prevotella               |
| 67542 | 1 | 11698 | CR5       | Prevotella               |
| 67664 | 1 | 11728 | CR8       | Prevotella               |
| 68290 | 1 | 11782 | CR8       |                          |
| 68573 | 1 | 12789 | CR5       |                          |
| 69046 | 1 | 12758 | CO        |                          |
| 69286 | 1 | 11760 | CR5       |                          |
| 69319 | 1 | 12649 | CO        |                          |
| 69417 | 1 | 12463 | CO        |                          |
| 69519 | 1 | 12266 | CO        |                          |
| 69633 | 1 | 11732 | CO        |                          |
| 69681 | 2 | 23705 | CO,CR5    |                          |
| 69770 | 2 | 27711 | CO,CR5    |                          |
| 69931 | 3 | 38502 | CO,UR,CR5 |                          |
| 69992 | 3 | 36059 | CO,UR,CR8 | Finegoldia               |
| 70043 | 1 | 12593 | CR5       |                          |
| 70051 | 3 | 36427 | CO,UR,CR8 | Finegoldia magna         |
| 70082 | 2 | 26512 | CO,CR8    | Eubacterium              |
| 70118 | 2 | 24434 | CO,CR8    | Eubacterium              |
| 70179 | 2 | 25779 | CR8,CR5   |                          |
| 70180 | 1 | 12690 | CR5       | Peptoniphilus            |
| 70289 | 1 | 12934 | CO        | Peptoniphilus            |
| 70417 | 1 | 12026 | CR5       |                          |
| 70425 | 1 | 12662 | CO        |                          |
| 70485 | 1 | 12711 | CO        |                          |
| 70579 | 1 | 12663 | CO        |                          |
| 70606 | 2 | 25566 | CO,CR5    |                          |
| 70627 | 1 | 12484 | CR8       | Helcococcus              |
| 70639 | 2 | 24646 | CO,CR8    |                          |
| 70669 | 2 | 25006 | CO,CR8    | Anaerococcus             |
| 70706 | 1 | 12182 | CR8       | Anaerococcus             |
| 70712 | 1 | 13083 | CR5       | Anaerococcus             |
| 70729 | 1 | 11956 | CR8       |                          |
| 70775 | 1 | 11768 | CR8       |                          |
| 70828 | 1 | 11793 | CO_PMA    | Spiroplasma              |
| 70838 | 1 | 12020 | CO        |                          |
| 70850 | 3 | 38593 | CO,UR,CR5 | Anaerococcus             |
| 70892 | 1 | 12258 | CO        |                          |
| 70902 | 1 | 11777 | CO        |                          |
| 70911 | 3 | 39312 | CO,UR,CR5 |                          |
| 70956 | 1 | 12007 | CO        |                          |

|       |   |       |               |                           |
|-------|---|-------|---------------|---------------------------|
| 70959 | 1 | 13196 | CR5           | Anaerococcus              |
| 70970 | 2 | 25024 | CO,CR8        |                           |
| 71020 | 2 | 26145 | CR8,CR5       | Anaerococcus              |
| 71056 | 3 | 38021 | CO,UR,CR5     |                           |
| 71075 | 2 | 26288 | CR8,CR5       | Anaerococcus              |
| 71089 | 1 | 11855 | CR8           | Anaerococcus hydrogenalis |
| 71091 | 1 | 12535 | CR8           | Anaerococcus              |
| 71105 | 1 | 12160 | CO            |                           |
| 71113 | 1 | 11714 | CR8           | Anaerococcus              |
| 71159 | 1 | 11871 | CO            |                           |
| 71178 | 1 | 11819 | CO            |                           |
| 71190 | 1 | 13010 | CO            |                           |
| 71191 | 1 | 12668 | CR8           | Anaerococcus              |
| 71202 | 4 | 53724 | CO,UR,CR8,CR5 | Anaerococcus              |
| 71224 | 1 | 11898 | CR8           | Anaerococcus prevotii     |
| 71226 | 1 | 13106 | CR8           | Anaerococcus              |
| 71261 | 3 | 36617 | CO,UR,CR8     |                           |
| 71274 | 3 | 36646 | CO,UR,CR5     |                           |
| 71411 | 1 | 12388 | CR8           | sfA                       |
| 71526 | 1 | 11881 | CO            | Zplanct13                 |
| 71601 | 3 | 36162 | CO,UR,CR5     | sfA                       |
| 71623 | 1 | 11738 | CO            | PSB-M-3                   |
| 71820 | 2 | 25564 | CR8,CR5       | Lactobacillus crispatus   |
| 71863 | 1 | 12258 | CR8           | Leuconostoc citreum       |
| 71907 | 1 | 12044 | CR8           | Leuconostoc               |
| 71916 | 1 | 12106 | CR8           | Leuconostoc citreum       |
| 71919 | 3 | 35960 | CO,UR,CR5     | Leptotrichia              |
| 71936 | 1 | 11780 | UR            | Lactobacillus             |
| 71954 | 1 | 12580 | UR            | Lactobacillus             |
| 71968 | 1 | 11613 | UR            | Lactobacillus             |
| 72006 | 1 | 11728 | CR5           | Lactobacillus             |
| 72019 | 1 | 12021 | UR            | Lactobacillus panis       |
| 72042 | 1 | 12984 | UR            | Lactobacillus             |
| 72061 | 3 | 37244 | CO,UR,CR5     | Rickettsia australis      |
| 72132 | 1 | 13585 | CR5           | Lactobacillus             |
| 72147 | 2 | 25068 | UR,CR8        | Leuconostoc citreum       |
| 72160 | 1 | 13004 | UR            | Lactobacillus             |
| 72197 | 1 | 12573 | CR5           | Lactobacillus             |
| 72200 | 1 | 12776 | CR8           | Leuconostoc citreum       |
| 72201 | 2 | 25688 | CO,CR5        | Lactobacillus             |
| 72285 | 2 | 25839 | CO,CR5        | Lactobacillus             |
| 72329 | 1 | 12322 | CO            | Rickettsia                |
| 72453 | 1 | 12038 | CR8           | Leuconostoc citreum       |
| 72531 | 1 | 12811 | CR8           | Carnobacterium divergens  |
| 72563 | 2 | 24717 | CR8,CR5       | Lactobacillus             |
| 72582 | 1 | 12221 | CR8           |                           |
| 72587 | 1 | 12305 | CO            | Clostridium perfringens   |
| 72592 | 1 | 13179 | CR5           | Rickettsia akari          |
| 72597 | 1 | 13251 | UR            | Lactobacillus             |
| 72610 | 1 | 12113 | CR8           | Leuconostoc citreum       |

|         |      |          |               |                         |
|---------|------|----------|---------------|-------------------------|
| 72629   | 1    | 12301    | CR8           | Leuconostoc             |
| 72637   | 1    | 11639    | CR8           | Lactobacillus           |
| 72646   | 1    | 12113    | CR8           | Leuconostoc             |
| 72729   | 1    | 12371    | CR8           | Lactobacillus           |
| 72761   | 2    | 25742    | CO,CR8        | Lactobacillus           |
| 72795   | 1    | 11772    | CR8           |                         |
| 72839   | 2    | 26649    | CO,CR8        | Lactobacillus           |
| 72855   | 1    | 12698    | UR            | Lactobacillus           |
| 72859   | 1    | 12055    | UR            | Lactobacillus crispatus |
| 72884   | 2    | 25168    | CR8,CR5       | Lactobacillus           |
| 72916   | 1    | 12320    | CR8           | Lactobacillus           |
| 72927   | 1    | 12177    | CR8           | Leuconostoc             |
| 72956   | 1    | 12587    | CR5           | Rickettsia akari        |
| 72987   | 1    | 11823    | CR8           | Leuconostoc             |
| 73168   | 1    | 12009    | CR5           | Dyadobacter             |
| 73491   | 1    | 12616    | CR5           | Runella                 |
| 73514   | 2    | 27198    | CR8,CR5       | Hymenobacter            |
| 73689   | 2    | 25281    | UR,CR8        | Cytophaga               |
| 73726   | 1    | 11764    | CR8           | Candidatus Odysella     |
| 73871   | 1    | 12733    | CR8           |                         |
| 73923   | 1    | 12801    | CO            | Fulvivirga              |
| 74031   | 4    | 49322    | CO,UR,CR8,CR5 | Hymenobacter            |
| 74065   | 2    | 24333    | CR8,CR5       | Hymenobacter            |
| 74285   | 2    | 25557    | CO,CR5        | Hymenobacter            |
| 74655   | 1    | 11981    | CO            |                         |
| 74689   | 2    | 24092    | CO,CR5        | sfJ                     |
| 74948   | 1    | 12550    | CO            |                         |
| 75099   | 3    | 36716    | CO,UR,CR5     | sfA                     |
| 75605   | 1    | 12253    | CO            |                         |
| 75644   | 3    | 37266    | CO,UR,CR5     | sfA                     |
| 75661   | 1    | 12101    | CR8           | sfJ                     |
| 75676   | 1    | 11654    | CR8           |                         |
| 75878   | 1    | 13002    | CO            | sfA                     |
| 76572   | 1    | 12997    | CO            | Spirochaeta             |
| CO      | 945  | 11918756 |               |                         |
| CO_PMA  | 203  | 2404656  |               |                         |
| CR5     | 639  | 8097025  |               |                         |
| CR5_PMA | 23   | 143800   |               |                         |
| CR8     | 1011 | 12613814 |               |                         |
| CR8_PMA | 69   | 732870   |               |                         |
| UR      | 513  | 6383769  |               |                         |
| UR_PMA  | 2    | 25634    |               |                         |

Table S10.2. real edge table for rOTU network  
(based on PhyloChip data) and visualization in  
Cytoscape

| from | to    | eweight |
|------|-------|---------|
| CO   | 10116 | 12142   |
| CO   | 10173 | 13212   |
| CO   | 10596 | 12310   |
| CO   | 10657 | 12765   |
| CO   | 10737 | 11758   |
| CO   | 10744 | 12389   |
| CO   | 10760 | 12733   |
| CO   | 10870 | 12572   |
| CO   | 1095  | 12846   |
| CO   | 10995 | 12305   |
| CO   | 11150 | 13235   |
| CO   | 11204 | 13581   |
| CO   | 11208 | 12047   |
| CO   | 11318 | 13008   |
| CO   | 11490 | 12950   |
| CO   | 11636 | 13283   |
| CO   | 11657 | 13021   |
| CO   | 11724 | 12904   |
| CO   | 11897 | 11821   |
| CO   | 11929 | 11737   |
| CO   | 11980 | 12000   |
| CO   | 12094 | 13336   |
| CO   | 12175 | 12449   |
| CO   | 12187 | 12139   |
| CO   | 12211 | 11876   |
| CO   | 12392 | 13042   |
| CO   | 12745 | 12717   |
| CO   | 12870 | 12851   |
| CO   | 12882 | 12049   |
| CO   | 12912 | 12554   |
| CO   | 12928 | 11758   |
| CO   | 12934 | 11996   |
| CO   | 13091 | 12582   |
| CO   | 13092 | 12017   |
| CO   | 13106 | 12186   |
| CO   | 13122 | 12581   |
| CO   | 13274 | 12808   |
| CO   | 13362 | 11753   |
| CO   | 13882 | 12174   |
| CO   | 14199 | 12840   |
| CO   | 14292 | 12474   |
| CO   | 14622 | 12390   |
| CO   | 1481  | 12449   |
| CO   | 14831 | 13172   |
| CO   | 15016 | 12224   |
| CO   | 15127 | 12926   |
| CO   | 15459 | 12157   |
| CO   | 15581 | 12883   |
| CO   | 15621 | 12073   |
| CO   | 15679 | 11703   |
| CO   | 15719 | 12076   |
| CO   | 15731 | 12129   |
| CO   | 15831 | 12183   |
| CO   | 15917 | 12449   |
| CO   | 15920 | 12350   |
| CO   | 15978 | 11716   |
| CO   | 15987 | 12425   |
| CO   | 16065 | 12179   |
| CO   | 16161 | 12379   |
| CO   | 16221 | 12675   |
| CO   | 16340 | 12229   |
| CO   | 16349 | 12525   |
| CO   | 16376 | 12836   |

|    |       |       |
|----|-------|-------|
| CO | 16384 | 12538 |
| CO | 16425 | 12382 |
| CO | 16495 | 12702 |
| CO | 16687 | 13050 |
| CO | 16734 | 12643 |
| CO | 16819 | 12434 |
| CO | 16847 | 12169 |
| CO | 16916 | 12113 |
| CO | 16937 | 13983 |
| CO | 17357 | 12146 |
| CO | 17392 | 13006 |
| CO | 19752 | 11891 |
| CO | 20192 | 12194 |
| CO | 21155 | 11997 |
| CO | 22190 | 12305 |
| CO | 23140 | 11862 |
| CO | 23182 | 12434 |
| CO | 23349 | 12089 |
| CO | 23897 | 12552 |
| CO | 24119 | 12096 |
| CO | 24447 | 13098 |
| CO | 24455 | 11751 |
| CO | 24600 | 11860 |
| CO | 24602 | 12434 |
| CO | 24608 | 11753 |
| CO | 24612 | 11763 |
| CO | 24646 | 11747 |
| CO | 24700 | 11938 |
| CO | 24841 | 12027 |
| CO | 24857 | 12123 |
| CO | 24978 | 12300 |
| CO | 24996 | 12177 |
| CO | 25078 | 12295 |
| CO | 25126 | 11802 |
| CO | 25139 | 12505 |
| CO | 25273 | 11677 |
| CO | 25288 | 12453 |
| CO | 25291 | 11832 |
| CO | 25319 | 11767 |
| CO | 25341 | 13178 |
| CO | 25380 | 12952 |
| CO | 25499 | 12043 |
| CO | 25549 | 11785 |
| CO | 25558 | 12000 |
| CO | 25604 | 11867 |
| CO | 25719 | 11818 |
| CO | 25759 | 11729 |
| CO | 25804 | 11964 |
| CO | 25901 | 13219 |
| CO | 25950 | 12251 |
| CO | 25994 | 12652 |
| CO | 26041 | 12013 |
| CO | 26109 | 12075 |
| CO | 26129 | 11990 |
| CO | 26219 | 12034 |
| CO | 26227 | 12453 |
| CO | 26356 | 11745 |
| CO | 26371 | 12602 |
| CO | 26430 | 11954 |
| CO | 26462 | 12772 |
| CO | 26599 | 12082 |
| CO | 26611 | 11793 |
| CO | 26613 | 11866 |
| CO | 26744 | 11733 |
| CO | 26746 | 12132 |
| CO | 26768 | 12505 |
| CO | 26910 | 11990 |

|    |       |       |
|----|-------|-------|
| CO | 26984 | 11803 |
| CO | 28113 | 12974 |
| CO | 28664 | 12106 |
| CO | 28989 | 12163 |
| CO | 29901 | 12451 |
| CO | 29909 | 12436 |
| CO | 30017 | 13291 |
| CO | 30922 | 12691 |
| CO | 30996 | 14191 |
| CO | 31205 | 12816 |
| CO | 32200 | 13021 |
| CO | 33058 | 13426 |
| CO | 33700 | 13858 |
| CO | 34240 | 12813 |
| CO | 34464 | 13545 |
| CO | 34741 | 12471 |
| CO | 35227 | 12622 |
| CO | 35586 | 12847 |
| CO | 36142 | 13059 |
| CO | 36759 | 13071 |
| CO | 36763 | 13265 |
| CO | 36785 | 13243 |
| CO | 36787 | 12068 |
| CO | 36803 | 13635 |
| CO | 36823 | 12201 |
| CO | 36837 | 12727 |
| CO | 36911 | 13247 |
| CO | 36930 | 12302 |
| CO | 36931 | 11937 |
| CO | 36933 | 13277 |
| CO | 36937 | 13155 |
| CO | 36943 | 13112 |
| CO | 36983 | 12006 |
| CO | 37007 | 12430 |
| CO | 37025 | 12507 |
| CO | 37036 | 12285 |
| CO | 37061 | 12684 |
| CO | 37089 | 13166 |
| CO | 37107 | 13147 |
| CO | 37124 | 12637 |
| CO | 37125 | 13217 |
| CO | 37129 | 13302 |
| CO | 37161 | 12825 |
| CO | 37166 | 11848 |
| CO | 37178 | 13148 |
| CO | 37183 | 12620 |
| CO | 37193 | 13201 |
| CO | 37226 | 12388 |
| CO | 37268 | 12095 |
| CO | 37280 | 13406 |
| CO | 37293 | 12361 |
| CO | 37312 | 12668 |
| CO | 37315 | 13290 |
| CO | 37325 | 13116 |
| CO | 37390 | 11803 |
| CO | 37394 | 12674 |
| CO | 37398 | 12794 |
| CO | 37429 | 12905 |
| CO | 37506 | 13089 |
| CO | 37536 | 12604 |
| CO | 37549 | 12052 |
| CO | 37576 | 13109 |
| CO | 37598 | 13184 |
| CO | 37630 | 12109 |
| CO | 37671 | 12795 |
| CO | 37679 | 12538 |
| CO | 37688 | 12943 |

|    |       |       |
|----|-------|-------|
| CO | 37779 | 12834 |
| CO | 37783 | 13074 |
| CO | 37813 | 12917 |
| CO | 37814 | 12756 |
| CO | 37820 | 12910 |
| CO | 37835 | 13181 |
| CO | 37838 | 13036 |
| CO | 37868 | 12011 |
| CO | 37877 | 13600 |
| CO | 37907 | 12241 |
| CO | 37917 | 12018 |
| CO | 37921 | 12868 |
| CO | 37948 | 13049 |
| CO | 37955 | 11882 |
| CO | 37963 | 12125 |
| CO | 37984 | 12725 |
| CO | 38001 | 12709 |
| CO | 38072 | 12562 |
| CO | 38083 | 12068 |
| CO | 38099 | 12716 |
| CO | 38101 | 13302 |
| CO | 38164 | 13477 |
| CO | 38210 | 12716 |
| CO | 38238 | 11728 |
| CO | 38248 | 12888 |
| CO | 38266 | 13304 |
| CO | 38393 | 12895 |
| CO | 38427 | 12989 |
| CO | 38432 | 12969 |
| CO | 38433 | 12917 |
| CO | 38444 | 11712 |
| CO | 38524 | 13162 |
| CO | 38640 | 13368 |
| CO | 38646 | 13082 |
| CO | 38691 | 12262 |
| CO | 38721 | 12670 |
| CO | 38747 | 12222 |
| CO | 38755 | 12545 |
| CO | 38823 | 12702 |
| CO | 38848 | 12958 |
| CO | 38907 | 13685 |
| CO | 38920 | 12946 |
| CO | 38958 | 13215 |
| CO | 38996 | 13656 |
| CO | 39081 | 13791 |
| CO | 39084 | 11970 |
| CO | 39092 | 12732 |
| CO | 39094 | 11718 |
| CO | 39109 | 12597 |
| CO | 39124 | 13012 |
| CO | 39242 | 12308 |
| CO | 39259 | 12830 |
| CO | 39424 | 12729 |
| CO | 39435 | 12599 |
| CO | 39484 | 12949 |
| CO | 39541 | 12805 |
| CO | 39558 | 12953 |
| CO | 39602 | 12378 |
| CO | 39646 | 11672 |
| CO | 39650 | 13530 |
| CO | 39654 | 13181 |
| CO | 39661 | 13087 |
| CO | 39719 | 13211 |
| CO | 39733 | 13728 |
| CO | 39746 | 12532 |
| CO | 39802 | 12692 |
| CO | 39819 | 11771 |

|    |       |       |
|----|-------|-------|
| CO | 39857 | 12714 |
| CO | 39910 | 13699 |
| CO | 39946 | 13078 |
| CO | 39968 | 12773 |
| CO | 39989 | 12829 |
| CO | 40014 | 12335 |
| CO | 40039 | 12818 |
| CO | 40042 | 13654 |
| CO | 40049 | 11972 |
| CO | 40067 | 12822 |
| CO | 40117 | 12507 |
| CO | 40141 | 12935 |
| CO | 40148 | 13758 |
| CO | 40152 | 12855 |
| CO | 40171 | 13555 |
| CO | 40172 | 12583 |
| CO | 40175 | 13012 |
| CO | 40178 | 13205 |
| CO | 40188 | 12255 |
| CO | 40191 | 13438 |
| CO | 40193 | 12993 |
| CO | 40199 | 12662 |
| CO | 40202 | 13331 |
| CO | 40206 | 13049 |
| CO | 40210 | 13485 |
| CO | 40219 | 13412 |
| CO | 40222 | 12642 |
| CO | 40234 | 12052 |
| CO | 40235 | 13375 |
| CO | 40238 | 12554 |
| CO | 40241 | 12617 |
| CO | 40245 | 13658 |
| CO | 40262 | 12919 |
| CO | 40278 | 11781 |
| CO | 40289 | 13205 |
| CO | 40303 | 13136 |
| CO | 40314 | 13401 |
| CO | 40325 | 12579 |
| CO | 40334 | 12535 |
| CO | 40335 | 12774 |
| CO | 40340 | 13154 |
| CO | 40347 | 13413 |
| CO | 40352 | 13425 |
| CO | 40373 | 13286 |
| CO | 40375 | 12426 |
| CO | 40382 | 12976 |
| CO | 40399 | 12816 |
| CO | 40408 | 12026 |
| CO | 40412 | 12619 |
| CO | 40425 | 12900 |
| CO | 40426 | 11882 |
| CO | 40436 | 13343 |
| CO | 40442 | 12854 |
| CO | 40455 | 13034 |
| CO | 40474 | 13264 |
| CO | 40479 | 13337 |
| CO | 40484 | 13006 |
| CO | 40486 | 12465 |
| CO | 40488 | 13223 |
| CO | 40490 | 12449 |
| CO | 40495 | 13011 |
| CO | 40505 | 13513 |
| CO | 40510 | 13234 |
| CO | 40512 | 13181 |
| CO | 40522 | 12893 |
| CO | 40535 | 12662 |
| CO | 40549 | 12071 |

|    |       |       |
|----|-------|-------|
| CO | 40558 | 12871 |
| CO | 40568 | 12966 |
| CO | 40575 | 13213 |
| CO | 40586 | 13512 |
| CO | 40597 | 12877 |
| CO | 40610 | 13336 |
| CO | 40611 | 13356 |
| CO | 40619 | 12366 |
| CO | 40621 | 12827 |
| CO | 40629 | 13281 |
| CO | 40639 | 12950 |
| CO | 40640 | 12805 |
| CO | 40666 | 12936 |
| CO | 40678 | 13037 |
| CO | 40686 | 13526 |
| CO | 40696 | 12743 |
| CO | 40697 | 12803 |
| CO | 40718 | 13498 |
| CO | 40727 | 13070 |
| CO | 40740 | 13356 |
| CO | 40741 | 13149 |
| CO | 40743 | 12303 |
| CO | 40749 | 13506 |
| CO | 40753 | 12860 |
| CO | 40757 | 13000 |
| CO | 40778 | 13421 |
| CO | 40805 | 12721 |
| CO | 40827 | 12095 |
| CO | 40834 | 12603 |
| CO | 40846 | 12870 |
| CO | 40861 | 12831 |
| CO | 40875 | 13121 |
| CO | 40884 | 12838 |
| CO | 40890 | 12212 |
| CO | 40911 | 13182 |
| CO | 40912 | 12639 |
| CO | 40917 | 13240 |
| CO | 40919 | 12679 |
| CO | 40921 | 12976 |
| CO | 40925 | 13649 |
| CO | 40932 | 13690 |
| CO | 40960 | 12685 |
| CO | 40962 | 13163 |
| CO | 40968 | 13106 |
| CO | 40976 | 13653 |
| CO | 40984 | 12650 |
| CO | 40988 | 13545 |
| CO | 40992 | 13047 |
| CO | 41001 | 12814 |
| CO | 41006 | 13236 |
| CO | 41008 | 13095 |
| CO | 41013 | 12517 |
| CO | 41015 | 11989 |
| CO | 41016 | 12275 |
| CO | 41022 | 12304 |
| CO | 41035 | 13380 |
| CO | 41048 | 13162 |
| CO | 41049 | 12817 |
| CO | 41050 | 12547 |
| CO | 41054 | 13427 |
| CO | 41058 | 13221 |
| CO | 41060 | 13048 |
| CO | 41061 | 13512 |
| CO | 41068 | 13210 |
| CO | 41078 | 12782 |
| CO | 41079 | 12569 |
| CO | 41080 | 13477 |

|    |       |       |
|----|-------|-------|
| CO | 41088 | 12693 |
| CO | 41101 | 12812 |
| CO | 41105 | 12675 |
| CO | 41110 | 12431 |
| CO | 41114 | 12886 |
| CO | 41123 | 13359 |
| CO | 41163 | 11808 |
| CO | 41199 | 12681 |
| CO | 41209 | 12613 |
| CO | 41227 | 13035 |
| CO | 41235 | 13329 |
| CO | 41250 | 13077 |
| CO | 41275 | 13107 |
| CO | 41284 | 12914 |
| CO | 41285 | 13280 |
| CO | 41288 | 12791 |
| CO | 41293 | 13671 |
| CO | 41301 | 12540 |
| CO | 41305 | 13139 |
| CO | 41369 | 12796 |
| CO | 41371 | 12494 |
| CO | 41373 | 12499 |
| CO | 41399 | 13271 |
| CO | 41444 | 11725 |
| CO | 41480 | 12687 |
| CO | 41535 | 13018 |
| CO | 41546 | 14116 |
| CO | 41552 | 12088 |
| CO | 41578 | 12204 |
| CO | 41631 | 13200 |
| CO | 41636 | 12480 |
| CO | 41637 | 12381 |
| CO | 41639 | 12642 |
| CO | 41657 | 13326 |
| CO | 41730 | 12500 |
| CO | 41745 | 13357 |
| CO | 41755 | 12192 |
| CO | 41760 | 13196 |
| CO | 41779 | 12176 |
| CO | 41840 | 12732 |
| CO | 41854 | 12592 |
| CO | 41868 | 12853 |
| CO | 41881 | 12917 |
| CO | 41886 | 12640 |
| CO | 41904 | 13676 |
| CO | 41908 | 13243 |
| CO | 41923 | 13474 |
| CO | 41925 | 12951 |
| CO | 41931 | 13177 |
| CO | 41938 | 12899 |
| CO | 41946 | 13070 |
| CO | 41992 | 12070 |
| CO | 42065 | 12681 |
| CO | 42075 | 12617 |
| CO | 42081 | 12552 |
| CO | 42091 | 13690 |
| CO | 42095 | 12648 |
| CO | 42104 | 13062 |
| CO | 42131 | 13007 |
| CO | 42149 | 13535 |
| CO | 42150 | 11713 |
| CO | 42189 | 12147 |
| CO | 42236 | 12870 |
| CO | 42247 | 12505 |
| CO | 42358 | 12512 |
| CO | 42400 | 12024 |
| CO | 42425 | 12052 |

|    |       |       |
|----|-------|-------|
| CO | 42432 | 12851 |
| CO | 42436 | 12483 |
| CO | 42479 | 13126 |
| CO | 42505 | 12750 |
| CO | 42743 | 12203 |
| CO | 42814 | 12379 |
| CO | 42959 | 13637 |
| CO | 43227 | 12790 |
| CO | 43705 | 11875 |
| CO | 43780 | 12773 |
| CO | 43975 | 12216 |
| CO | 44153 | 12567 |
| CO | 44160 | 12502 |
| CO | 44167 | 12047 |
| CO | 44182 | 12198 |
| CO | 44212 | 12939 |
| CO | 44224 | 12760 |
| CO | 44235 | 12152 |
| CO | 44243 | 12453 |
| CO | 44257 | 12301 |
| CO | 44277 | 12482 |
| CO | 44280 | 12173 |
| CO | 44299 | 12763 |
| CO | 44308 | 12099 |
| CO | 44316 | 12298 |
| CO | 44346 | 12628 |
| CO | 44363 | 12314 |
| CO | 44383 | 12225 |
| CO | 44422 | 12217 |
| CO | 44432 | 12182 |
| CO | 44452 | 12258 |
| CO | 44482 | 12374 |
| CO | 44501 | 12226 |
| CO | 44511 | 12517 |
| CO | 44516 | 12020 |
| CO | 44533 | 12046 |
| CO | 44534 | 12433 |
| CO | 44552 | 12284 |
| CO | 44553 | 11846 |
| CO | 44554 | 12245 |
| CO | 44562 | 12470 |
| CO | 44565 | 12629 |
| CO | 44574 | 12023 |
| CO | 44590 | 12363 |
| CO | 44604 | 12248 |
| CO | 44608 | 12141 |
| CO | 44633 | 12070 |
| CO | 44644 | 11997 |
| CO | 44647 | 12387 |
| CO | 44651 | 11832 |
| CO | 44673 | 12244 |
| CO | 44681 | 12256 |
| CO | 44702 | 11721 |
| CO | 44703 | 12516 |
| CO | 44743 | 12437 |
| CO | 44744 | 11926 |
| CO | 44745 | 12663 |
| CO | 44751 | 12451 |
| CO | 44757 | 12376 |
| CO | 44767 | 12145 |
| CO | 44770 | 12280 |
| CO | 44778 | 12161 |
| CO | 44789 | 12610 |
| CO | 44792 | 12652 |
| CO | 44816 | 12506 |
| CO | 44823 | 12546 |
| CO | 44826 | 12119 |

|    |       |       |
|----|-------|-------|
| CO | 44829 | 11921 |
| CO | 44860 | 12672 |
| CO | 44896 | 12817 |
| CO | 44910 | 12287 |
| CO | 44911 | 12319 |
| CO | 44912 | 12006 |
| CO | 44928 | 12274 |
| CO | 44958 | 12234 |
| CO | 44969 | 12489 |
| CO | 44997 | 12458 |
| CO | 45005 | 12482 |
| CO | 45008 | 12481 |
| CO | 45015 | 11970 |
| CO | 45016 | 12162 |
| CO | 45052 | 12902 |
| CO | 45053 | 12157 |
| CO | 45105 | 12111 |
| CO | 45118 | 12389 |
| CO | 45130 | 12622 |
| CO | 45131 | 12324 |
| CO | 45158 | 12605 |
| CO | 45161 | 13211 |
| CO | 45167 | 12318 |
| CO | 45210 | 12518 |
| CO | 45228 | 12223 |
| CO | 45230 | 12363 |
| CO | 45238 | 12054 |
| CO | 45269 | 12645 |
| CO | 45286 | 12572 |
| CO | 45299 | 12570 |
| CO | 45300 | 12440 |
| CO | 45304 | 12425 |
| CO | 45308 | 12213 |
| CO | 45311 | 12826 |
| CO | 45320 | 12771 |
| CO | 45321 | 12448 |
| CO | 45324 | 12648 |
| CO | 45326 | 12284 |
| CO | 45343 | 12492 |
| CO | 45350 | 12091 |
| CO | 45352 | 12200 |
| CO | 45385 | 12428 |
| CO | 45404 | 12068 |
| CO | 45427 | 12385 |
| CO | 45438 | 13086 |
| CO | 45440 | 12290 |
| CO | 45474 | 13273 |
| CO | 45481 | 12407 |
| CO | 45483 | 11885 |
| CO | 45493 | 12348 |
| CO | 45500 | 12119 |
| CO | 45507 | 12387 |
| CO | 45508 | 12706 |
| CO | 45513 | 13096 |
| CO | 45523 | 12855 |
| CO | 45531 | 12753 |
| CO | 45536 | 12074 |
| CO | 45542 | 13549 |
| CO | 45543 | 12490 |
| CO | 45549 | 12360 |
| CO | 45563 | 12413 |
| CO | 45564 | 11767 |
| CO | 45587 | 12739 |
| CO | 45601 | 12312 |
| CO | 45626 | 12348 |
| CO | 45628 | 12270 |
| CO | 45636 | 12174 |

|    |       |       |
|----|-------|-------|
| CO | 45679 | 12330 |
| CO | 45695 | 12271 |
| CO | 45720 | 12515 |
| CO | 45735 | 12240 |
| CO | 45744 | 12485 |
| CO | 45786 | 12925 |
| CO | 45803 | 12496 |
| CO | 45828 | 12101 |
| CO | 45837 | 12155 |
| CO | 45844 | 12500 |
| CO | 45861 | 12172 |
| CO | 45870 | 12151 |
| CO | 45878 | 12671 |
| CO | 45879 | 12304 |
| CO | 45887 | 12563 |
| CO | 45988 | 12266 |
| CO | 46067 | 13288 |
| CO | 46157 | 12726 |
| CO | 46162 | 12962 |
| CO | 46189 | 13545 |
| CO | 46190 | 13167 |
| CO | 46215 | 12904 |
| CO | 46259 | 11886 |
| CO | 46293 | 12891 |
| CO | 46342 | 12407 |
| CO | 46372 | 12559 |
| CO | 46398 | 12435 |
| CO | 46450 | 12769 |
| CO | 46463 | 13109 |
| CO | 46464 | 12885 |
| CO | 46516 | 12973 |
| CO | 46562 | 13416 |
| CO | 46568 | 12272 |
| CO | 46607 | 12667 |
| CO | 46612 | 13407 |
| CO | 46667 | 13378 |
| CO | 46682 | 12682 |
| CO | 46706 | 12021 |
| CO | 46718 | 12472 |
| CO | 46720 | 12455 |
| CO | 46779 | 12462 |
| CO | 46868 | 11845 |
| CO | 46981 | 13048 |
| CO | 47128 | 13213 |
| CO | 47130 | 12852 |
| CO | 47243 | 13096 |
| CO | 47248 | 13299 |
| CO | 47276 | 12842 |
| CO | 47320 | 12874 |
| CO | 47345 | 12472 |
| CO | 47361 | 12795 |
| CO | 47419 | 12346 |
| CO | 47425 | 12711 |
| CO | 47551 | 12961 |
| CO | 47564 | 12758 |
| CO | 47616 | 12618 |
| CO | 47628 | 12487 |
| CO | 47638 | 12328 |
| CO | 47666 | 12519 |
| CO | 47672 | 13157 |
| CO | 47724 | 13431 |
| CO | 47756 | 13155 |
| CO | 47761 | 12800 |
| CO | 47806 | 13319 |
| CO | 47821 | 13097 |
| CO | 47832 | 12895 |
| CO | 47841 | 12035 |

|    |       |       |
|----|-------|-------|
| CO | 47878 | 13236 |
| CO | 47963 | 12490 |
| CO | 48027 | 12973 |
| CO | 48075 | 12919 |
| CO | 48213 | 13320 |
| CO | 48279 | 13411 |
| CO | 48423 | 13454 |
| CO | 48497 | 13147 |
| CO | 48536 | 13435 |
| CO | 48581 | 13218 |
| CO | 48710 | 12836 |
| CO | 48819 | 12711 |
| CO | 48821 | 13514 |
| CO | 48936 | 12800 |
| CO | 49052 | 13283 |
| CO | 49101 | 12163 |
| CO | 49167 | 13319 |
| CO | 49178 | 13574 |
| CO | 49187 | 13388 |
| CO | 49213 | 11725 |
| CO | 49268 | 13450 |
| CO | 49312 | 11787 |
| CO | 49325 | 13183 |
| CO | 49395 | 13255 |
| CO | 49446 | 13435 |
| CO | 49493 | 13309 |
| CO | 49532 | 12695 |
| CO | 49637 | 13541 |
| CO | 49766 | 13421 |
| CO | 49990 | 12485 |
| CO | 50043 | 11723 |
| CO | 50073 | 11880 |
| CO | 50102 | 11970 |
| CO | 50464 | 12720 |
| CO | 50564 | 12894 |
| CO | 50569 | 12351 |
| CO | 50574 | 11930 |
| CO | 507   | 12269 |
| CO | 50707 | 12704 |
| CO | 50725 | 11744 |
| CO | 50847 | 11787 |
| CO | 51431 | 12040 |
| CO | 51571 | 12088 |
| CO | 51836 | 13386 |
| CO | 51929 | 11941 |
| CO | 52401 | 12497 |
| CO | 52457 | 12155 |
| CO | 52737 | 11812 |
| CO | 53292 | 12412 |
| CO | 53368 | 12108 |
| CO | 53583 | 12029 |
| CO | 53672 | 12785 |
| CO | 53704 | 12016 |
| CO | 53818 | 11986 |
| CO | 53827 | 13152 |
| CO | 54850 | 12133 |
| CO | 54955 | 12330 |
| CO | 55347 | 13077 |
| CO | 5538  | 13273 |
| CO | 55518 | 13217 |
| CO | 55774 | 12582 |
| CO | 56113 | 13119 |
| CO | 56168 | 12366 |
| CO | 56623 | 12435 |
| CO | 57019 | 11877 |
| CO | 57357 | 13622 |
| CO | 57583 | 12210 |

|    |       |       |
|----|-------|-------|
| CO | 57616 | 12717 |
| CO | 57707 | 12209 |
| CO | 58114 | 11983 |
| CO | 58369 | 12294 |
| CO | 58422 | 12126 |
| CO | 58446 | 12192 |
| CO | 58534 | 12322 |
| CO | 58535 | 12502 |
| CO | 58556 | 11866 |
| CO | 58567 | 13345 |
| CO | 58579 | 12807 |
| CO | 58597 | 12406 |
| CO | 58619 | 13227 |
| CO | 58625 | 12922 |
| CO | 58646 | 12482 |
| CO | 58667 | 11886 |
| CO | 58691 | 11751 |
| CO | 58886 | 12494 |
| CO | 58971 | 12959 |
| CO | 58982 | 11777 |
| CO | 59027 | 12273 |
| CO | 59070 | 12526 |
| CO | 59071 | 11912 |
| CO | 59105 | 11768 |
| CO | 59127 | 13272 |
| CO | 59195 | 12148 |
| CO | 59198 | 13108 |
| CO | 59212 | 11672 |
| CO | 59247 | 11972 |
| CO | 59259 | 12141 |
| CO | 59279 | 13197 |
| CO | 59284 | 12274 |
| CO | 59299 | 12394 |
| CO | 59317 | 12156 |
| CO | 59321 | 11750 |
| CO | 59396 | 11675 |
| CO | 59404 | 11687 |
| CO | 59420 | 12488 |
| CO | 59421 | 13018 |
| CO | 59454 | 13467 |
| CO | 59463 | 13044 |
| CO | 59486 | 11956 |
| CO | 59560 | 12935 |
| CO | 59566 | 13225 |
| CO | 59571 | 12051 |
| CO | 59636 | 12410 |
| CO | 59710 | 11816 |
| CO | 59718 | 12001 |
| CO | 59725 | 12736 |
| CO | 59740 | 11984 |
| CO | 59754 | 11767 |
| CO | 59760 | 12537 |
| CO | 59786 | 12577 |
| CO | 59791 | 12253 |
| CO | 59826 | 11904 |
| CO | 59837 | 12457 |
| CO | 59875 | 12761 |
| CO | 59890 | 11804 |
| CO | 59903 | 12504 |
| CO | 59904 | 12822 |
| CO | 59915 | 13304 |
| CO | 59959 | 12717 |
| CO | 59960 | 12494 |
| CO | 59983 | 12022 |
| CO | 60031 | 12257 |
| CO | 60050 | 12359 |
| CO | 60065 | 12116 |

|    |       |       |
|----|-------|-------|
| CO | 60071 | 13263 |
| CO | 60100 | 12029 |
| CO | 60119 | 12429 |
| CO | 60205 | 12649 |
| CO | 60278 | 12120 |
| CO | 60281 | 12735 |
| CO | 60301 | 11764 |
| CO | 60315 | 12300 |
| CO | 60351 | 11741 |
| CO | 60378 | 13265 |
| CO | 60405 | 12440 |
| CO | 60449 | 11943 |
| CO | 60475 | 13166 |
| CO | 60492 | 11714 |
| CO | 60523 | 13594 |
| CO | 60560 | 12119 |
| CO | 60672 | 12229 |
| CO | 60741 | 12505 |
| CO | 60769 | 11805 |
| CO | 60808 | 12968 |
| CO | 60837 | 12344 |
| CO | 60840 | 11828 |
| CO | 60851 | 11892 |
| CO | 60910 | 12369 |
| CO | 60916 | 12827 |
| CO | 60926 | 12743 |
| CO | 60961 | 12280 |
| CO | 61013 | 12640 |
| CO | 61062 | 12162 |
| CO | 61082 | 12415 |
| CO | 61087 | 13145 |
| CO | 61094 | 13558 |
| CO | 61105 | 12622 |
| CO | 61133 | 12171 |
| CO | 61191 | 12449 |
| CO | 61290 | 11746 |
| CO | 61336 | 12017 |
| CO | 61355 | 13031 |
| CO | 61385 | 12087 |
| CO | 61473 | 13260 |
| CO | 61538 | 11845 |
| CO | 61557 | 11866 |
| CO | 61612 | 13008 |
| CO | 61693 | 12427 |
| CO | 61699 | 13320 |
| CO | 61764 | 12832 |
| CO | 61774 | 12049 |
| CO | 61810 | 12886 |
| CO | 61909 | 13285 |
| CO | 61913 | 12070 |
| CO | 61965 | 13793 |
| CO | 61966 | 13120 |
| CO | 62019 | 12797 |
| CO | 62280 | 13206 |
| CO | 62320 | 12087 |
| CO | 62348 | 13252 |
| CO | 62391 | 12725 |
| CO | 62417 | 12631 |
| CO | 62419 | 11975 |
| CO | 62424 | 12691 |
| CO | 62439 | 12604 |
| CO | 62450 | 13108 |
| CO | 62476 | 13629 |
| CO | 62496 | 13498 |
| CO | 62512 | 12153 |
| CO | 62538 | 12500 |
| CO | 62664 | 13797 |

|    |       |       |
|----|-------|-------|
| CO | 62669 | 12090 |
| CO | 62724 | 11676 |
| CO | 62760 | 12302 |
| CO | 62790 | 12321 |
| CO | 62812 | 11918 |
| CO | 62819 | 12130 |
| CO | 62825 | 12560 |
| CO | 63187 | 11933 |
| CO | 63573 | 13008 |
| CO | 64568 | 12633 |
| CO | 64654 | 11751 |
| CO | 65912 | 11894 |
| CO | 66605 | 12308 |
| CO | 69046 | 12758 |
| CO | 69319 | 12649 |
| CO | 69417 | 12463 |
| CO | 69519 | 12266 |
| CO | 69633 | 11732 |
| CO | 69681 | 11884 |
| CO | 69770 | 13752 |
| CO | 69992 | 11924 |
| CO | 70051 | 11899 |
| CO | 70082 | 13367 |
| CO | 70118 | 12482 |
| CO | 70289 | 12934 |
| CO | 70425 | 12662 |
| CO | 70485 | 12711 |
| CO | 70579 | 12663 |
| CO | 70606 | 12701 |
| CO | 70639 | 12613 |
| CO | 70669 | 12620 |
| CO | 70838 | 12020 |
| CO | 70892 | 12258 |
| CO | 70902 | 11777 |
| CO | 70911 | 13374 |
| CO | 70956 | 12007 |
| CO | 70970 | 12710 |
| CO | 71056 | 12838 |
| CO | 71105 | 12160 |
| CO | 71159 | 11871 |
| CO | 71178 | 11819 |
| CO | 71190 | 13010 |
| CO | 71202 | 13205 |
| CO | 71261 | 12419 |
| CO | 71526 | 11881 |
| CO | 71601 | 12271 |
| CO | 71623 | 11738 |
| CO | 71919 | 12018 |
| CO | 72061 | 12726 |
| CO | 72201 | 12664 |
| CO | 72285 | 12878 |
| CO | 72329 | 12322 |
| CO | 72587 | 12305 |
| CO | 72761 | 12711 |
| CO | 72839 | 13416 |
| CO | 73923 | 12801 |
| CO | 74031 | 12838 |
| CO | 74285 | 12986 |
| CO | 74655 | 11981 |
| CO | 74689 | 12095 |
| CO | 74948 | 12550 |
| CO | 75099 | 12674 |
| CO | 75605 | 12253 |
| CO | 75644 | 12807 |
| CO | 75878 | 13002 |
| CO | 76572 | 12997 |
| CO | 7917  | 12216 |

|        |       |       |
|--------|-------|-------|
| CO     | 8300  | 13253 |
| CO     | 8663  | 12180 |
| CO     | 9103  | 12759 |
| CO     | 9140  | 12197 |
| CO     | 9232  | 12743 |
| CO     | 9359  | 12169 |
| CO     | 9380  | 12967 |
| CO     | 9418  | 13016 |
| CO     | 9623  | 12772 |
| CO     | 9681  | 12275 |
| CO     | 9742  | 12943 |
| CO_PMA | 10173 | 11943 |
| CO_PMA | 10344 | 14123 |
| CO_PMA | 10400 | 11498 |
| CO_PMA | 10672 | 1     |
| CO_PMA | 10804 | 12146 |
| CO_PMA | 11137 | 12670 |
| CO_PMA | 11657 | 11894 |
| CO_PMA | 11757 | 13437 |
| CO_PMA | 12094 | 13115 |
| CO_PMA | 12326 | 1     |
| CO_PMA | 12529 | 1     |
| CO_PMA | 13088 | 11709 |
| CO_PMA | 13769 | 11523 |
| CO_PMA | 14055 | 11532 |
| CO_PMA | 14194 | 12055 |
| CO_PMA | 14545 | 11529 |
| CO_PMA | 16384 | 12412 |
| CO_PMA | 28504 | 13345 |
| CO_PMA | 28641 | 13073 |
| CO_PMA | 28691 | 12293 |
| CO_PMA | 28754 | 12589 |
| CO_PMA | 28961 | 11590 |
| CO_PMA | 29382 | 1     |
| CO_PMA | 29693 | 11892 |
| CO_PMA | 29743 | 12633 |
| CO_PMA | 29861 | 1     |
| CO_PMA | 30142 | 11929 |
| CO_PMA | 30177 | 12916 |
| CO_PMA | 30430 | 13197 |
| CO_PMA | 30513 | 12573 |
| CO_PMA | 30652 | 13013 |
| CO_PMA | 30734 | 12555 |
| CO_PMA | 30787 | 1     |
| CO_PMA | 30849 | 13287 |
| CO_PMA | 30996 | 12760 |
| CO_PMA | 31163 | 11612 |
| CO_PMA | 31218 | 12448 |
| CO_PMA | 31464 | 1     |
| CO_PMA | 31702 | 12178 |
| CO_PMA | 31823 | 13325 |
| CO_PMA | 32200 | 11894 |
| CO_PMA | 32344 | 13429 |
| CO_PMA | 32411 | 12582 |
| CO_PMA | 32497 | 1     |
| CO_PMA | 33258 | 12806 |
| CO_PMA | 33873 | 12643 |
| CO_PMA | 34161 | 1     |
| CO_PMA | 34318 | 11700 |
| CO_PMA | 34389 | 12911 |
| CO_PMA | 34438 | 12071 |
| CO_PMA | 34708 | 12920 |
| CO_PMA | 35009 | 12781 |
| CO_PMA | 35030 | 13334 |
| CO_PMA | 35042 | 1     |
| CO_PMA | 35066 | 12390 |
| CO_PMA | 35165 | 13478 |

|        |       |       |
|--------|-------|-------|
| CO_PMA | 35235 | 13848 |
| CO_PMA | 35240 | 12368 |
| CO_PMA | 35254 | 12667 |
| CO_PMA | 35383 | 1     |
| CO_PMA | 35512 | 11867 |
| CO_PMA | 35819 | 13134 |
| CO_PMA | 35860 | 11402 |
| CO_PMA | 36035 | 11878 |
| CO_PMA | 36091 | 12653 |
| CO_PMA | 36137 | 13103 |
| CO_PMA | 36510 | 12104 |
| CO_PMA | 36693 | 11661 |
| CO_PMA | 37076 | 12146 |
| CO_PMA | 37097 | 11769 |
| CO_PMA | 37253 | 11950 |
| CO_PMA | 37566 | 12054 |
| CO_PMA | 39733 | 12133 |
| CO_PMA | 40158 | 13425 |
| CO_PMA | 40159 | 12610 |
| CO_PMA | 40162 | 12063 |
| CO_PMA | 40182 | 11464 |
| CO_PMA | 40264 | 13159 |
| CO_PMA | 40550 | 11425 |
| CO_PMA | 40685 | 13214 |
| CO_PMA | 40925 | 11566 |
| CO_PMA | 41012 | 12734 |
| CO_PMA | 46189 | 12280 |
| CO_PMA | 46244 | 11713 |
| CO_PMA | 46420 | 12849 |
| CO_PMA | 46527 | 11499 |
| CO_PMA | 46793 | 12676 |
| CO_PMA | 46981 | 11418 |
| CO_PMA | 47528 | 11973 |
| CO_PMA | 47806 | 12167 |
| CO_PMA | 47819 | 11462 |
| CO_PMA | 48213 | 13413 |
| CO_PMA | 48215 | 13204 |
| CO_PMA | 48279 | 13433 |
| CO_PMA | 48318 | 12927 |
| CO_PMA | 48364 | 13171 |
| CO_PMA | 48388 | 13471 |
| CO_PMA | 48423 | 13208 |
| CO_PMA | 48440 | 13247 |
| CO_PMA | 48497 | 13191 |
| CO_PMA | 48536 | 13611 |
| CO_PMA | 48581 | 13364 |
| CO_PMA | 48645 | 12513 |
| CO_PMA | 48660 | 12788 |
| CO_PMA | 48662 | 13373 |
| CO_PMA | 48675 | 13193 |
| CO_PMA | 48690 | 11855 |
| CO_PMA | 48691 | 13274 |
| CO_PMA | 48784 | 12851 |
| CO_PMA | 48805 | 13152 |
| CO_PMA | 48819 | 12987 |
| CO_PMA | 48821 | 13435 |
| CO_PMA | 48825 | 11817 |
| CO_PMA | 48851 | 13156 |
| CO_PMA | 48861 | 13016 |
| CO_PMA | 48936 | 12691 |
| CO_PMA | 48975 | 12973 |
| CO_PMA | 48981 | 12819 |
| CO_PMA | 49022 | 13029 |
| CO_PMA | 49050 | 12530 |
| CO_PMA | 49052 | 13310 |
| CO_PMA | 49107 | 12819 |
| CO_PMA | 49129 | 13591 |

|        |       |       |
|--------|-------|-------|
| CO_PMA | 49160 | 13405 |
| CO_PMA | 49167 | 13427 |
| CO_PMA | 49168 | 13148 |
| CO_PMA | 49172 | 13538 |
| CO_PMA | 49178 | 13760 |
| CO_PMA | 49187 | 13443 |
| CO_PMA | 49214 | 13583 |
| CO_PMA | 49265 | 13419 |
| CO_PMA | 49268 | 12990 |
| CO_PMA | 49305 | 12680 |
| CO_PMA | 49325 | 13436 |
| CO_PMA | 49357 | 13373 |
| CO_PMA | 49365 | 13631 |
| CO_PMA | 49366 | 13371 |
| CO_PMA | 49395 | 13310 |
| CO_PMA | 49446 | 13611 |
| CO_PMA | 49493 | 13547 |
| CO_PMA | 49495 | 13413 |
| CO_PMA | 49532 | 12717 |
| CO_PMA | 49591 | 13709 |
| CO_PMA | 49623 | 13216 |
| CO_PMA | 49637 | 13692 |
| CO_PMA | 49669 | 13062 |
| CO_PMA | 49688 | 12845 |
| CO_PMA | 49864 | 12941 |
| CO_PMA | 49874 | 12003 |
| CO_PMA | 49912 | 13176 |
| CO_PMA | 49937 | 13563 |
| CO_PMA | 54344 | 12186 |
| CO_PMA | 56900 | 12992 |
| CO_PMA | 57982 | 12964 |
| CO_PMA | 58435 | 13602 |
| CO_PMA | 59560 | 11753 |
| CO_PMA | 59792 | 12367 |
| CO_PMA | 59915 | 12362 |
| CO_PMA | 59989 | 14218 |
| CO_PMA | 60042 | 14106 |
| CO_PMA | 60211 | 11809 |
| CO_PMA | 60315 | 12921 |
| CO_PMA | 60332 | 12147 |
| CO_PMA | 60348 | 13629 |
| CO_PMA | 60395 | 13261 |
| CO_PMA | 60398 | 12292 |
| CO_PMA | 60568 | 12338 |
| CO_PMA | 60579 | 12306 |
| CO_PMA | 60732 | 13065 |
| CO_PMA | 60770 | 11769 |
| CO_PMA | 60826 | 12131 |
| CO_PMA | 60827 | 13239 |
| CO_PMA | 60902 | 11444 |
| CO_PMA | 60931 | 12597 |
| CO_PMA | 60970 | 11765 |
| CO_PMA | 61060 | 13070 |
| CO_PMA | 61102 | 11774 |
| CO_PMA | 61127 | 12292 |
| CO_PMA | 61158 | 13249 |
| CO_PMA | 61302 | 12837 |
| CO_PMA | 61327 | 12426 |
| CO_PMA | 61333 | 11811 |
| CO_PMA | 61965 | 11843 |
| CO_PMA | 62194 | 12427 |
| CO_PMA | 62220 | 11663 |
| CO_PMA | 62371 | 12227 |
| CO_PMA | 62496 | 11756 |
| CO_PMA | 62578 | 11694 |
| CO_PMA | 70828 | 11793 |
| CO_PMA | 7682  | 13023 |

|        |       |       |
|--------|-------|-------|
| CO_PMA | 7899  | 1     |
| CO_PMA | 8070  | 12447 |
| CO_PMA | 8086  | 13833 |
| CO_PMA | 8217  | 12738 |
| CO_PMA | 8385  | 13005 |
| CO_PMA | 8546  | 11761 |
| CO_PMA | 8845  | 11981 |
| CO_PMA | 9071  | 12533 |
| CO_PMA | 9082  | 12746 |
| CO_PMA | 9103  | 11818 |
| CO_PMA | 9176  | 1     |
| CO_PMA | 9579  | 11467 |
| CO_PMA | 9619  | 11578 |
| CR5    | 10672 | 1     |
| CR5    | 10744 | 12433 |
| CR5    | 10870 | 12339 |
| CR5    | 1095  | 12607 |
| CR5    | 11150 | 13311 |
| CR5    | 11657 | 13230 |
| CR5    | 11724 | 12715 |
| CR5    | 1193  | 11637 |
| CR5    | 12217 | 13228 |
| CR5    | 12326 | 1     |
| CR5    | 12912 | 11779 |
| CR5    | 1440  | 12117 |
| CR5    | 14545 | 12214 |
| CR5    | 15581 | 12476 |
| CR5    | 15685 | 13705 |
| CR5    | 160   | 11889 |
| CR5    | 16030 | 11899 |
| CR5    | 16221 | 12651 |
| CR5    | 1638  | 11837 |
| CR5    | 16384 | 12506 |
| CR5    | 16495 | 11828 |
| CR5    | 16819 | 11761 |
| CR5    | 17229 | 12324 |
| CR5    | 17427 | 11815 |
| CR5    | 17447 | 12614 |
| CR5    | 17661 | 11996 |
| CR5    | 17677 | 12227 |
| CR5    | 17726 | 12282 |
| CR5    | 17744 | 12028 |
| CR5    | 17765 | 13759 |
| CR5    | 17792 | 11699 |
| CR5    | 17828 | 12203 |
| CR5    | 17852 | 12307 |
| CR5    | 17893 | 12779 |
| CR5    | 17943 | 11766 |
| CR5    | 17964 | 12249 |
| CR5    | 18113 | 11847 |
| CR5    | 18175 | 12365 |
| CR5    | 18222 | 12241 |
| CR5    | 18252 | 12119 |
| CR5    | 18254 | 12380 |
| CR5    | 18281 | 11633 |
| CR5    | 2058  | 11686 |
| CR5    | 20652 | 12783 |
| CR5    | 21155 | 11985 |
| CR5    | 2281  | 12341 |
| CR5    | 24427 | 12205 |
| CR5    | 24509 | 13296 |
| CR5    | 24700 | 12035 |
| CR5    | 24841 | 11784 |
| CR5    | 24857 | 12148 |
| CR5    | 24978 | 12593 |
| CR5    | 25077 | 11714 |
| CR5    | 25139 | 12653 |

|     |       |       |
|-----|-------|-------|
| CR5 | 25637 | 12284 |
| CR5 | 25901 | 13295 |
| CR5 | 25914 | 12021 |
| CR5 | 26109 | 11678 |
| CR5 | 26227 | 12765 |
| CR5 | 26269 | 11708 |
| CR5 | 26288 | 13720 |
| CR5 | 26371 | 12470 |
| CR5 | 26599 | 12146 |
| CR5 | 26611 | 11761 |
| CR5 | 26768 | 11934 |
| CR5 | 26984 | 12000 |
| CR5 | 27392 | 12183 |
| CR5 | 27536 | 12066 |
| CR5 | 28159 | 12607 |
| CR5 | 28655 | 13034 |
| CR5 | 28664 | 12234 |
| CR5 | 28754 | 14249 |
| CR5 | 28768 | 12409 |
| CR5 | 28989 | 12157 |
| CR5 | 29901 | 13055 |
| CR5 | 29909 | 13635 |
| CR5 | 30016 | 12156 |
| CR5 | 30017 | 13905 |
| CR5 | 30421 | 13719 |
| CR5 | 30787 | 1     |
| CR5 | 30922 | 12886 |
| CR5 | 31080 | 13365 |
| CR5 | 31205 | 12316 |
| CR5 | 32200 | 13230 |
| CR5 | 32357 | 14157 |
| CR5 | 32607 | 13698 |
| CR5 | 33058 | 13828 |
| CR5 | 33300 | 12993 |
| CR5 | 33488 | 14094 |
| CR5 | 3369  | 13326 |
| CR5 | 33892 | 13248 |
| CR5 | 34124 | 13744 |
| CR5 | 34240 | 13491 |
| CR5 | 34438 | 13979 |
| CR5 | 34464 | 13993 |
| CR5 | 34741 | 12656 |
| CR5 | 3494  | 12242 |
| CR5 | 35066 | 13975 |
| CR5 | 35183 | 13995 |
| CR5 | 35227 | 12539 |
| CR5 | 35586 | 13729 |
| CR5 | 35629 | 14189 |
| CR5 | 35716 | 13095 |
| CR5 | 36142 | 13725 |
| CR5 | 36542 | 13663 |
| CR5 | 36754 | 12844 |
| CR5 | 36763 | 13539 |
| CR5 | 36770 | 13549 |
| CR5 | 36785 | 13892 |
| CR5 | 36787 | 12524 |
| CR5 | 36803 | 14195 |
| CR5 | 36804 | 13711 |
| CR5 | 36823 | 12223 |
| CR5 | 36837 | 13007 |
| CR5 | 36867 | 13843 |
| CR5 | 36880 | 12178 |
| CR5 | 36895 | 13758 |
| CR5 | 36906 | 13474 |
| CR5 | 36908 | 13104 |
| CR5 | 36931 | 12166 |
| CR5 | 36933 | 13808 |

|     |       |       |
|-----|-------|-------|
| CR5 | 36937 | 14042 |
| CR5 | 36940 | 12317 |
| CR5 | 36943 | 13956 |
| CR5 | 36949 | 12791 |
| CR5 | 36955 | 13365 |
| CR5 | 36980 | 13797 |
| CR5 | 37004 | 13481 |
| CR5 | 37007 | 13113 |
| CR5 | 37029 | 14079 |
| CR5 | 37046 | 13568 |
| CR5 | 37071 | 13709 |
| CR5 | 37086 | 12254 |
| CR5 | 37089 | 14041 |
| CR5 | 37129 | 14166 |
| CR5 | 37151 | 14019 |
| CR5 | 37161 | 13747 |
| CR5 | 37170 | 12791 |
| CR5 | 37172 | 12043 |
| CR5 | 37178 | 12966 |
| CR5 | 37180 | 13117 |
| CR5 | 37183 | 12931 |
| CR5 | 3719  | 11769 |
| CR5 | 37199 | 13051 |
| CR5 | 37226 | 12884 |
| CR5 | 37247 | 13381 |
| CR5 | 37264 | 11960 |
| CR5 | 37268 | 12108 |
| CR5 | 37293 | 12607 |
| CR5 | 37315 | 13958 |
| CR5 | 37329 | 13165 |
| CR5 | 37358 | 14085 |
| CR5 | 3736  | 11651 |
| CR5 | 37365 | 14230 |
| CR5 | 37394 | 12630 |
| CR5 | 37398 | 12567 |
| CR5 | 37429 | 13296 |
| CR5 | 37449 | 12985 |
| CR5 | 37494 | 13110 |
| CR5 | 37536 | 12357 |
| CR5 | 37576 | 13205 |
| CR5 | 37579 | 13213 |
| CR5 | 37622 | 13291 |
| CR5 | 37633 | 12562 |
| CR5 | 37679 | 12116 |
| CR5 | 37688 | 13196 |
| CR5 | 37726 | 14145 |
| CR5 | 37735 | 12476 |
| CR5 | 37737 | 12680 |
| CR5 | 3774  | 11859 |
| CR5 | 37746 | 12487 |
| CR5 | 37763 | 12610 |
| CR5 | 37779 | 11821 |
| CR5 | 37783 | 13396 |
| CR5 | 37813 | 13058 |
| CR5 | 37814 | 12241 |
| CR5 | 37820 | 12856 |
| CR5 | 37833 | 11831 |
| CR5 | 37835 | 12522 |
| CR5 | 37838 | 12801 |
| CR5 | 37860 | 12184 |
| CR5 | 37877 | 13816 |
| CR5 | 37881 | 13071 |
| CR5 | 37920 | 12410 |
| CR5 | 37921 | 12530 |
| CR5 | 37948 | 12689 |
| CR5 | 37996 | 12979 |
| CR5 | 38020 | 13720 |

|     |       |       |
|-----|-------|-------|
| CR5 | 38099 | 12238 |
| CR5 | 38101 | 12772 |
| CR5 | 38103 | 12303 |
| CR5 | 38108 | 12313 |
| CR5 | 38165 | 11737 |
| CR5 | 38168 | 13445 |
| CR5 | 38210 | 12774 |
| CR5 | 38270 | 12408 |
| CR5 | 38303 | 12851 |
| CR5 | 38331 | 13622 |
| CR5 | 38337 | 13512 |
| CR5 | 38393 | 13134 |
| CR5 | 38394 | 12461 |
| CR5 | 38433 | 13058 |
| CR5 | 38499 | 13084 |
| CR5 | 38628 | 13179 |
| CR5 | 38646 | 12389 |
| CR5 | 38679 | 13169 |
| CR5 | 38726 | 13190 |
| CR5 | 38746 | 12279 |
| CR5 | 38907 | 13296 |
| CR5 | 38920 | 12216 |
| CR5 | 38958 | 13267 |
| CR5 | 38996 | 13100 |
| CR5 | 39027 | 13571 |
| CR5 | 39054 | 11943 |
| CR5 | 39092 | 12347 |
| CR5 | 39124 | 12676 |
| CR5 | 39208 | 12921 |
| CR5 | 3925  | 12673 |
| CR5 | 39343 | 13344 |
| CR5 | 39401 | 12215 |
| CR5 | 39473 | 12919 |
| CR5 | 39484 | 12664 |
| CR5 | 39549 | 14089 |
| CR5 | 39559 | 13023 |
| CR5 | 39588 | 13429 |
| CR5 | 39650 | 13622 |
| CR5 | 39654 | 12855 |
| CR5 | 39719 | 12786 |
| CR5 | 39774 | 13430 |
| CR5 | 39833 | 13070 |
| CR5 | 39926 | 12904 |
| CR5 | 40042 | 13083 |
| CR5 | 40055 | 11890 |
| CR5 | 40076 | 13114 |
| CR5 | 40101 | 12776 |
| CR5 | 4011  | 11886 |
| CR5 | 40117 | 12099 |
| CR5 | 40145 | 13128 |
| CR5 | 40148 | 12805 |
| CR5 | 40152 | 12749 |
| CR5 | 40156 | 12898 |
| CR5 | 40158 | 14650 |
| CR5 | 40159 | 13918 |
| CR5 | 40170 | 13964 |
| CR5 | 40171 | 13931 |
| CR5 | 40172 | 12651 |
| CR5 | 40191 | 12843 |
| CR5 | 40193 | 13193 |
| CR5 | 40199 | 12352 |
| CR5 | 40206 | 12170 |
| CR5 | 40210 | 13829 |
| CR5 | 40216 | 14071 |
| CR5 | 40220 | 13517 |
| CR5 | 40224 | 13064 |
| CR5 | 40235 | 13743 |

|     |       |       |
|-----|-------|-------|
| CR5 | 40241 | 13214 |
| CR5 | 40245 | 13293 |
| CR5 | 40262 | 12837 |
| CR5 | 40303 | 13255 |
| CR5 | 40304 | 13035 |
| CR5 | 40333 | 13988 |
| CR5 | 40334 | 12826 |
| CR5 | 40337 | 12401 |
| CR5 | 40340 | 13119 |
| CR5 | 40356 | 13734 |
| CR5 | 40382 | 12136 |
| CR5 | 40389 | 13564 |
| CR5 | 40394 | 14376 |
| CR5 | 40402 | 13394 |
| CR5 | 40415 | 12432 |
| CR5 | 40416 | 12230 |
| CR5 | 40427 | 12620 |
| CR5 | 40455 | 12708 |
| CR5 | 40474 | 13426 |
| CR5 | 40488 | 12444 |
| CR5 | 40495 | 12244 |
| CR5 | 40505 | 12998 |
| CR5 | 40512 | 13124 |
| CR5 | 40518 | 13980 |
| CR5 | 40522 | 12516 |
| CR5 | 40526 | 12725 |
| CR5 | 40529 | 13716 |
| CR5 | 40531 | 13710 |
| CR5 | 40535 | 12383 |
| CR5 | 40558 | 11822 |
| CR5 | 40577 | 12978 |
| CR5 | 40578 | 13781 |
| CR5 | 40583 | 12401 |
| CR5 | 40586 | 13249 |
| CR5 | 40587 | 12452 |
| CR5 | 40610 | 13139 |
| CR5 | 40666 | 12574 |
| CR5 | 40676 | 13104 |
| CR5 | 40686 | 13744 |
| CR5 | 40705 | 12571 |
| CR5 | 40716 | 13168 |
| CR5 | 40723 | 13523 |
| CR5 | 40727 | 13146 |
| CR5 | 40749 | 13192 |
| CR5 | 40766 | 13966 |
| CR5 | 40778 | 13085 |
| CR5 | 40827 | 11876 |
| CR5 | 40867 | 12832 |
| CR5 | 40875 | 12361 |
| CR5 | 40876 | 13194 |
| CR5 | 40893 | 13890 |
| CR5 | 40898 | 13254 |
| CR5 | 40908 | 13753 |
| CR5 | 40912 | 12952 |
| CR5 | 40920 | 12006 |
| CR5 | 4093  | 11784 |
| CR5 | 40932 | 14061 |
| CR5 | 40945 | 12822 |
| CR5 | 40968 | 12546 |
| CR5 | 40976 | 13355 |
| CR5 | 40979 | 12814 |
| CR5 | 40984 | 12263 |
| CR5 | 40996 | 13785 |
| CR5 | 41001 | 12151 |
| CR5 | 41006 | 13460 |
| CR5 | 41008 | 12225 |
| CR5 | 41018 | 13583 |

|     |       |       |
|-----|-------|-------|
| CR5 | 41022 | 11748 |
| CR5 | 41035 | 12591 |
| CR5 | 41049 | 12942 |
| CR5 | 41068 | 13589 |
| CR5 | 41080 | 13145 |
| CR5 | 41088 | 12480 |
| CR5 | 41105 | 12145 |
| CR5 | 41114 | 12443 |
| CR5 | 41199 | 12446 |
| CR5 | 41204 | 13300 |
| CR5 | 41227 | 12928 |
| CR5 | 41235 | 13021 |
| CR5 | 41237 | 11907 |
| CR5 | 41253 | 12238 |
| CR5 | 41272 | 12436 |
| CR5 | 41284 | 12408 |
| CR5 | 41285 | 13001 |
| CR5 | 41293 | 13291 |
| CR5 | 41368 | 12732 |
| CR5 | 41371 | 12099 |
| CR5 | 41373 | 12255 |
| CR5 | 41460 | 12261 |
| CR5 | 41474 | 12364 |
| CR5 | 41489 | 11768 |
| CR5 | 41491 | 12087 |
| CR5 | 41493 | 11925 |
| CR5 | 41546 | 13948 |
| CR5 | 41631 | 12681 |
| CR5 | 41636 | 11839 |
| CR5 | 41639 | 12484 |
| CR5 | 41657 | 12799 |
| CR5 | 41721 | 12864 |
| CR5 | 41745 | 12836 |
| CR5 | 41749 | 11768 |
| CR5 | 41753 | 12956 |
| CR5 | 41770 | 12958 |
| CR5 | 41840 | 12559 |
| CR5 | 41854 | 11918 |
| CR5 | 41881 | 12818 |
| CR5 | 41886 | 12388 |
| CR5 | 41900 | 12147 |
| CR5 | 41904 | 13376 |
| CR5 | 41908 | 12603 |
| CR5 | 41923 | 13423 |
| CR5 | 41946 | 12568 |
| CR5 | 42004 | 13007 |
| CR5 | 42038 | 13551 |
| CR5 | 42075 | 12780 |
| CR5 | 42081 | 12759 |
| CR5 | 42104 | 12091 |
| CR5 | 42131 | 12597 |
| CR5 | 42149 | 13014 |
| CR5 | 42236 | 12409 |
| CR5 | 42295 | 12879 |
| CR5 | 42337 | 12576 |
| CR5 | 42357 | 12667 |
| CR5 | 42479 | 12754 |
| CR5 | 42694 | 13307 |
| CR5 | 42818 | 13240 |
| CR5 | 42959 | 13063 |
| CR5 | 43416 | 12642 |
| CR5 | 43697 | 11613 |
| CR5 | 43749 | 13210 |
| CR5 | 43752 | 12456 |
| CR5 | 43927 | 11774 |
| CR5 | 44151 | 12162 |
| CR5 | 44160 | 12269 |

|     |       |       |
|-----|-------|-------|
| CR5 | 44167 | 11881 |
| CR5 | 4421  | 11876 |
| CR5 | 44212 | 12770 |
| CR5 | 44221 | 12409 |
| CR5 | 44257 | 12212 |
| CR5 | 44299 | 12630 |
| CR5 | 44346 | 12334 |
| CR5 | 44363 | 12153 |
| CR5 | 44452 | 11930 |
| CR5 | 44501 | 11829 |
| CR5 | 44554 | 11852 |
| CR5 | 44565 | 12397 |
| CR5 | 44574 | 11729 |
| CR5 | 44633 | 11745 |
| CR5 | 44647 | 12130 |
| CR5 | 44666 | 11943 |
| CR5 | 4467  | 11825 |
| CR5 | 44673 | 11954 |
| CR5 | 44703 | 12216 |
| CR5 | 44721 | 13272 |
| CR5 | 44744 | 11634 |
| CR5 | 44751 | 12203 |
| CR5 | 44770 | 11953 |
| CR5 | 44792 | 12450 |
| CR5 | 44816 | 12337 |
| CR5 | 44823 | 12273 |
| CR5 | 44826 | 11970 |
| CR5 | 44829 | 11745 |
| CR5 | 44860 | 12392 |
| CR5 | 44884 | 12309 |
| CR5 | 44896 | 12636 |
| CR5 | 44904 | 11728 |
| CR5 | 44910 | 12302 |
| CR5 | 44911 | 12080 |
| CR5 | 44957 | 12102 |
| CR5 | 44958 | 11786 |
| CR5 | 4497  | 11830 |
| CR5 | 45005 | 12244 |
| CR5 | 45016 | 11837 |
| CR5 | 45105 | 11727 |
| CR5 | 45111 | 11740 |
| CR5 | 45118 | 12280 |
| CR5 | 45130 | 12468 |
| CR5 | 45131 | 12061 |
| CR5 | 45158 | 12366 |
| CR5 | 45161 | 12849 |
| CR5 | 45188 | 12749 |
| CR5 | 45297 | 12070 |
| CR5 | 45300 | 12198 |
| CR5 | 45311 | 12256 |
| CR5 | 45320 | 12542 |
| CR5 | 45326 | 11931 |
| CR5 | 45350 | 11699 |
| CR5 | 45352 | 12018 |
| CR5 | 45357 | 12550 |
| CR5 | 45385 | 12376 |
| CR5 | 45404 | 11762 |
| CR5 | 45427 | 11966 |
| CR5 | 45438 | 12892 |
| CR5 | 45481 | 12110 |
| CR5 | 45483 | 11624 |
| CR5 | 45493 | 11962 |
| CR5 | 45513 | 12814 |
| CR5 | 45523 | 12683 |
| CR5 | 45531 | 12549 |
| CR5 | 45536 | 11840 |
| CR5 | 45542 | 13683 |

|     |       |       |
|-----|-------|-------|
| CR5 | 45563 | 12258 |
| CR5 | 45587 | 12528 |
| CR5 | 45626 | 12067 |
| CR5 | 45628 | 12060 |
| CR5 | 45679 | 12008 |
| CR5 | 45695 | 11951 |
| CR5 | 45720 | 12217 |
| CR5 | 45744 | 12149 |
| CR5 | 45844 | 12235 |
| CR5 | 45870 | 11856 |
| CR5 | 45878 | 12446 |
| CR5 | 45879 | 11974 |
| CR5 | 45914 | 13629 |
| CR5 | 45951 | 13456 |
| CR5 | 45955 | 12891 |
| CR5 | 46162 | 13683 |
| CR5 | 46189 | 14186 |
| CR5 | 46190 | 13862 |
| CR5 | 46259 | 12316 |
| CR5 | 46372 | 12106 |
| CR5 | 46398 | 12696 |
| CR5 | 46532 | 13722 |
| CR5 | 46548 | 11770 |
| CR5 | 46562 | 14152 |
| CR5 | 46661 | 12840 |
| CR5 | 46668 | 11896 |
| CR5 | 46706 | 12987 |
| CR5 | 46720 | 13629 |
| CR5 | 46733 | 13839 |
| CR5 | 46738 | 12586 |
| CR5 | 46886 | 13635 |
| CR5 | 46891 | 13753 |
| CR5 | 46913 | 12994 |
| CR5 | 46981 | 13494 |
| CR5 | 47034 | 13650 |
| CR5 | 47114 | 13306 |
| CR5 | 47135 | 13068 |
| CR5 | 47175 | 13644 |
| CR5 | 47188 | 13025 |
| CR5 | 47445 | 13431 |
| CR5 | 47476 | 13066 |
| CR5 | 47616 | 13128 |
| CR5 | 47626 | 12778 |
| CR5 | 47628 | 12229 |
| CR5 | 47756 | 13463 |
| CR5 | 47806 | 13596 |
| CR5 | 47832 | 13596 |
| CR5 | 47878 | 13680 |
| CR5 | 47993 | 13752 |
| CR5 | 48021 | 12225 |
| CR5 | 48075 | 12811 |
| CR5 | 48830 | 13302 |
| CR5 | 48912 | 11896 |
| CR5 | 49397 | 12999 |
| CR5 | 4998  | 11749 |
| CR5 | 50031 | 12286 |
| CR5 | 50184 | 12641 |
| CR5 | 50477 | 12420 |
| CR5 | 507   | 11881 |
| CR5 | 50847 | 12097 |
| CR5 | 50864 | 13552 |
| CR5 | 50911 | 12707 |
| CR5 | 51676 | 12945 |
| CR5 | 51836 | 13333 |
| CR5 | 5272  | 12323 |
| CR5 | 52805 | 11813 |
| CR5 | 52935 | 13210 |

|     |       |       |
|-----|-------|-------|
| CR5 | 53678 | 13049 |
| CR5 | 53679 | 12312 |
| CR5 | 53967 | 12775 |
| CR5 | 54147 | 12150 |
| CR5 | 54684 | 13169 |
| CR5 | 5538  | 13377 |
| CR5 | 57357 | 13077 |
| CR5 | 57583 | 11718 |
| CR5 | 57878 | 12297 |
| CR5 | 58123 | 13022 |
| CR5 | 58316 | 12342 |
| CR5 | 58369 | 11801 |
| CR5 | 58484 | 12626 |
| CR5 | 58567 | 13021 |
| CR5 | 58588 | 12352 |
| CR5 | 58728 | 11944 |
| CR5 | 58818 | 12184 |
| CR5 | 59047 | 12124 |
| CR5 | 59224 | 12589 |
| CR5 | 59247 | 11771 |
| CR5 | 59318 | 11684 |
| CR5 | 59404 | 11613 |
| CR5 | 59421 | 12764 |
| CR5 | 59547 | 12773 |
| CR5 | 59560 | 12718 |
| CR5 | 59571 | 11790 |
| CR5 | 59725 | 12867 |
| CR5 | 59796 | 11722 |
| CR5 | 59837 | 12133 |
| CR5 | 59875 | 12693 |
| CR5 | 59915 | 13172 |
| CR5 | 60119 | 12403 |
| CR5 | 60205 | 12112 |
| CR5 | 60246 | 12613 |
| CR5 | 60281 | 12924 |
| CR5 | 60307 | 11854 |
| CR5 | 60348 | 13233 |
| CR5 | 60374 | 12750 |
| CR5 | 60378 | 12990 |
| CR5 | 60405 | 11861 |
| CR5 | 60467 | 13529 |
| CR5 | 60475 | 12906 |
| CR5 | 60523 | 13498 |
| CR5 | 60564 | 11733 |
| CR5 | 60732 | 12601 |
| CR5 | 60808 | 13029 |
| CR5 | 60837 | 12397 |
| CR5 | 60858 | 11623 |
| CR5 | 60916 | 12654 |
| CR5 | 61013 | 12707 |
| CR5 | 61082 | 11731 |
| CR5 | 61133 | 11858 |
| CR5 | 61191 | 12206 |
| CR5 | 6129  | 12462 |
| CR5 | 61325 | 12813 |
| CR5 | 61355 | 12932 |
| CR5 | 61473 | 12978 |
| CR5 | 61835 | 13260 |
| CR5 | 61909 | 12986 |
| CR5 | 6203  | 11896 |
| CR5 | 6211  | 12825 |
| CR5 | 62439 | 11662 |
| CR5 | 62769 | 12723 |
| CR5 | 63400 | 11835 |
| CR5 | 63573 | 13245 |
| CR5 | 63864 | 12770 |
| CR5 | 64220 | 12776 |

|         |       |       |
|---------|-------|-------|
| CR5     | 64623 | 11875 |
| CR5     | 64734 | 12371 |
| CR5     | 65875 | 12717 |
| CR5     | 66715 | 12265 |
| CR5     | 67542 | 11698 |
| CR5     | 68573 | 12789 |
| CR5     | 69286 | 11760 |
| CR5     | 69681 | 11821 |
| CR5     | 69770 | 13959 |
| CR5     | 69931 | 12920 |
| CR5     | 70043 | 12593 |
| CR5     | 70179 | 13197 |
| CR5     | 70180 | 12690 |
| CR5     | 70417 | 12026 |
| CR5     | 70606 | 12865 |
| CR5     | 70712 | 13083 |
| CR5     | 70850 | 13243 |
| CR5     | 70911 | 13164 |
| CR5     | 70959 | 13196 |
| CR5     | 71020 | 13282 |
| CR5     | 71056 | 12726 |
| CR5     | 71075 | 13319 |
| CR5     | 71202 | 13981 |
| CR5     | 71274 | 12528 |
| CR5     | 71601 | 12122 |
| CR5     | 71820 | 12977 |
| CR5     | 71919 | 12123 |
| CR5     | 72006 | 11728 |
| CR5     | 72061 | 12242 |
| CR5     | 72132 | 13585 |
| CR5     | 72197 | 12573 |
| CR5     | 72201 | 13024 |
| CR5     | 72285 | 12961 |
| CR5     | 72563 | 12172 |
| CR5     | 72592 | 13179 |
| CR5     | 72884 | 12476 |
| CR5     | 72956 | 12587 |
| CR5     | 73168 | 12009 |
| CR5     | 73491 | 12616 |
| CR5     | 73514 | 13876 |
| CR5     | 74031 | 12802 |
| CR5     | 74065 | 12255 |
| CR5     | 74285 | 12571 |
| CR5     | 74689 | 11997 |
| CR5     | 75099 | 12184 |
| CR5     | 75644 | 12611 |
| CR5     | 8071  | 13711 |
| CR5     | 8300  | 13013 |
| CR5     | 9872  | 13193 |
| CR5_PMA | 11853 | 12309 |
| CR5_PMA | 12326 | 1     |
| CR5_PMA | 12529 | 1     |
| CR5_PMA | 28504 | 12431 |
| CR5_PMA | 28961 | 10857 |
| CR5_PMA | 30513 | 11870 |
| CR5_PMA | 30787 | 1     |
| CR5_PMA | 30849 | 12411 |
| CR5_PMA | 31218 | 12087 |
| CR5_PMA | 31464 | 1     |
| CR5_PMA | 32497 | 1     |
| CR5_PMA | 33895 | 10972 |
| CR5_PMA | 34161 | 1     |
| CR5_PMA | 35042 | 1     |
| CR5_PMA | 40182 | 11706 |
| CR5_PMA | 53690 | 11973 |
| CR5_PMA | 58993 | 13402 |
| CR5_PMA | 59143 | 11905 |

|         |       |       |
|---------|-------|-------|
| CR5_PMA | 60425 | 1     |
| CR5_PMA | 61060 | 11866 |
| CR5_PMA | 62483 | 1     |
| CR5_PMA | 8961  | 1     |
| CR5_PMA | 9176  | 1     |
| CR8     | 1007  | 12220 |
| CR8     | 10344 | 13227 |
| CR8     | 10400 | 12726 |
| CR8     | 10409 | 12246 |
| CR8     | 10657 | 12620 |
| CR8     | 10672 | 1     |
| CR8     | 10744 | 13124 |
| CR8     | 10760 | 11845 |
| CR8     | 10851 | 12033 |
| CR8     | 10870 | 12642 |
| CR8     | 1095  | 12643 |
| CR8     | 11150 | 12923 |
| CR8     | 11204 | 13854 |
| CR8     | 11543 | 12126 |
| CR8     | 11612 | 12635 |
| CR8     | 11636 | 12534 |
| CR8     | 11657 | 12706 |
| CR8     | 11724 | 12931 |
| CR8     | 11897 | 11565 |
| CR8     | 11964 | 13913 |
| CR8     | 12094 | 12822 |
| CR8     | 12146 | 12123 |
| CR8     | 12175 | 11581 |
| CR8     | 12187 | 11584 |
| CR8     | 12217 | 13125 |
| CR8     | 12326 | 1     |
| CR8     | 12392 | 12634 |
| CR8     | 12476 | 13037 |
| CR8     | 12530 | 12429 |
| CR8     | 1257  | 11740 |
| CR8     | 12654 | 12277 |
| CR8     | 12745 | 11821 |
| CR8     | 1277  | 12278 |
| CR8     | 12809 | 12727 |
| CR8     | 12870 | 12117 |
| CR8     | 12912 | 11870 |
| CR8     | 1302  | 12212 |
| CR8     | 13162 | 13191 |
| CR8     | 13274 | 12256 |
| CR8     | 134   | 11756 |
| CR8     | 13400 | 12774 |
| CR8     | 13402 | 13124 |
| CR8     | 13681 | 11532 |
| CR8     | 13763 | 12079 |
| CR8     | 13882 | 11616 |
| CR8     | 13991 | 12708 |
| CR8     | 14121 | 12523 |
| CR8     | 14183 | 12913 |
| CR8     | 14194 | 12634 |
| CR8     | 14199 | 12391 |
| CR8     | 1444  | 11758 |
| CR8     | 14477 | 12274 |
| CR8     | 14545 | 12124 |
| CR8     | 14597 | 13266 |
| CR8     | 14641 | 12678 |
| CR8     | 14754 | 12870 |
| CR8     | 14779 | 13275 |
| CR8     | 1481  | 11749 |
| CR8     | 15016 | 11841 |
| CR8     | 15035 | 12532 |
| CR8     | 15292 | 12519 |
| CR8     | 15342 | 12373 |

|     |       |       |
|-----|-------|-------|
| CR8 | 15459 | 13207 |
| CR8 | 15508 | 12327 |
| CR8 | 15533 | 12038 |
| CR8 | 15566 | 12049 |
| CR8 | 15570 | 11656 |
| CR8 | 15581 | 12914 |
| CR8 | 15605 | 12317 |
| CR8 | 15647 | 11763 |
| CR8 | 1567  | 12909 |
| CR8 | 15685 | 13938 |
| CR8 | 15731 | 12091 |
| CR8 | 158   | 12369 |
| CR8 | 15831 | 11642 |
| CR8 | 160   | 11937 |
| CR8 | 16000 | 12480 |
| CR8 | 1638  | 11662 |
| CR8 | 16384 | 12601 |
| CR8 | 16717 | 11539 |
| CR8 | 17015 | 12326 |
| CR8 | 1738  | 11618 |
| CR8 | 17519 | 11988 |
| CR8 | 17765 | 13155 |
| CR8 | 17852 | 11557 |
| CR8 | 1796  | 11889 |
| CR8 | 18137 | 11744 |
| CR8 | 182   | 11718 |
| CR8 | 1844  | 12972 |
| CR8 | 18761 | 11860 |
| CR8 | 1884  | 12643 |
| CR8 | 1891  | 12019 |
| CR8 | 19470 | 12693 |
| CR8 | 2022  | 11733 |
| CR8 | 20652 | 12065 |
| CR8 | 20782 | 12016 |
| CR8 | 22140 | 12225 |
| CR8 | 2281  | 11957 |
| CR8 | 22993 | 12214 |
| CR8 | 24363 | 12731 |
| CR8 | 24509 | 12508 |
| CR8 | 24544 | 12347 |
| CR8 | 24602 | 12142 |
| CR8 | 24700 | 11632 |
| CR8 | 24978 | 12319 |
| CR8 | 24986 | 12312 |
| CR8 | 24996 | 11749 |
| CR8 | 25078 | 11726 |
| CR8 | 25221 | 12482 |
| CR8 | 25325 | 11524 |
| CR8 | 25341 | 12852 |
| CR8 | 25425 | 12205 |
| CR8 | 25637 | 11676 |
| CR8 | 25654 | 11727 |
| CR8 | 25901 | 12988 |
| CR8 | 25950 | 11704 |
| CR8 | 25994 | 12238 |
| CR8 | 26041 | 11554 |
| CR8 | 26288 | 12988 |
| CR8 | 26371 | 11913 |
| CR8 | 26393 | 11615 |
| CR8 | 26462 | 12681 |
| CR8 | 26514 | 11555 |
| CR8 | 26768 | 11815 |
| CR8 | 26984 | 11541 |
| CR8 | 27392 | 11852 |
| CR8 | 27490 | 12561 |
| CR8 | 28113 | 12571 |
| CR8 | 28754 | 13853 |

|     |       |       |
|-----|-------|-------|
| CR8 | 28819 | 13820 |
| CR8 | 28952 | 13251 |
| CR8 | 29901 | 12004 |
| CR8 | 30017 | 13344 |
| CR8 | 30645 | 12818 |
| CR8 | 30787 | 1     |
| CR8 | 30996 | 14124 |
| CR8 | 31080 | 12367 |
| CR8 | 31163 | 13327 |
| CR8 | 31205 | 12185 |
| CR8 | 31464 | 1     |
| CR8 | 31479 | 13557 |
| CR8 | 31655 | 13168 |
| CR8 | 32200 | 12706 |
| CR8 | 32607 | 12646 |
| CR8 | 32857 | 13228 |
| CR8 | 33058 | 13207 |
| CR8 | 33570 | 11937 |
| CR8 | 33576 | 13463 |
| CR8 | 33646 | 12764 |
| CR8 | 33688 | 13395 |
| CR8 | 3369  | 13323 |
| CR8 | 33847 | 13074 |
| CR8 | 33873 | 13846 |
| CR8 | 34240 | 12536 |
| CR8 | 34246 | 13293 |
| CR8 | 34438 | 13659 |
| CR8 | 34464 | 13516 |
| CR8 | 34741 | 12312 |
| CR8 | 34803 | 13149 |
| CR8 | 35066 | 13649 |
| CR8 | 35183 | 12666 |
| CR8 | 35716 | 12249 |
| CR8 | 36089 | 13245 |
| CR8 | 36142 | 12886 |
| CR8 | 36231 | 12989 |
| CR8 | 36381 | 13495 |
| CR8 | 36762 | 13526 |
| CR8 | 36772 | 13104 |
| CR8 | 36773 | 12416 |
| CR8 | 36785 | 13192 |
| CR8 | 36787 | 11678 |
| CR8 | 36803 | 13699 |
| CR8 | 36804 | 12640 |
| CR8 | 36834 | 12612 |
| CR8 | 36837 | 12458 |
| CR8 | 36867 | 12947 |
| CR8 | 36869 | 12469 |
| CR8 | 36895 | 12843 |
| CR8 | 36900 | 13361 |
| CR8 | 36906 | 12971 |
| CR8 | 36930 | 12488 |
| CR8 | 36937 | 13317 |
| CR8 | 36943 | 13278 |
| CR8 | 36957 | 12861 |
| CR8 | 36960 | 13304 |
| CR8 | 36983 | 11671 |
| CR8 | 36992 | 13529 |
| CR8 | 37046 | 12654 |
| CR8 | 37071 | 13181 |
| CR8 | 37089 | 13393 |
| CR8 | 37097 | 14195 |
| CR8 | 37107 | 13190 |
| CR8 | 37124 | 12411 |
| CR8 | 37125 | 13196 |
| CR8 | 37129 | 13518 |
| CR8 | 37151 | 13452 |

|     |       |       |
|-----|-------|-------|
| CR8 | 37166 | 11678 |
| CR8 | 37170 | 12578 |
| CR8 | 37172 | 12224 |
| CR8 | 37178 | 12877 |
| CR8 | 3719  | 11756 |
| CR8 | 37193 | 13088 |
| CR8 | 37198 | 13283 |
| CR8 | 37199 | 12078 |
| CR8 | 37201 | 12505 |
| CR8 | 37226 | 12323 |
| CR8 | 37232 | 13298 |
| CR8 | 37247 | 12362 |
| CR8 | 37255 | 13203 |
| CR8 | 37259 | 12811 |
| CR8 | 37268 | 11636 |
| CR8 | 37280 | 13671 |
| CR8 | 37293 | 12128 |
| CR8 | 37300 | 13734 |
| CR8 | 37315 | 13320 |
| CR8 | 3736  | 11591 |
| CR8 | 37364 | 11905 |
| CR8 | 37365 | 13709 |
| CR8 | 37393 | 12410 |
| CR8 | 37394 | 12023 |
| CR8 | 37403 | 12059 |
| CR8 | 37407 | 12491 |
| CR8 | 37429 | 12575 |
| CR8 | 37536 | 11838 |
| CR8 | 37562 | 12139 |
| CR8 | 37576 | 12758 |
| CR8 | 37609 | 11658 |
| CR8 | 37611 | 12146 |
| CR8 | 37619 | 13158 |
| CR8 | 37630 | 11603 |
| CR8 | 37671 | 12268 |
| CR8 | 37679 | 11827 |
| CR8 | 37688 | 12548 |
| CR8 | 37691 | 12018 |
| CR8 | 37726 | 13741 |
| CR8 | 37735 | 12191 |
| CR8 | 37737 | 12473 |
| CR8 | 37768 | 12698 |
| CR8 | 37779 | 11609 |
| CR8 | 37813 | 12416 |
| CR8 | 37835 | 12237 |
| CR8 | 37841 | 11991 |
| CR8 | 37860 | 11634 |
| CR8 | 37868 | 12409 |
| CR8 | 37877 | 13386 |
| CR8 | 37902 | 12364 |
| CR8 | 37907 | 12035 |
| CR8 | 37921 | 12362 |
| CR8 | 37924 | 11731 |
| CR8 | 37943 | 12518 |
| CR8 | 37955 | 11592 |
| CR8 | 37984 | 11849 |
| CR8 | 37996 | 12604 |
| CR8 | 38001 | 13109 |
| CR8 | 38020 | 13243 |
| CR8 | 38094 | 12286 |
| CR8 | 38115 | 12462 |
| CR8 | 38137 | 12146 |
| CR8 | 38210 | 12172 |
| CR8 | 38272 | 12169 |
| CR8 | 38281 | 12718 |
| CR8 | 38349 | 12678 |
| CR8 | 38371 | 12120 |

|     |       |       |
|-----|-------|-------|
| CR8 | 38393 | 12431 |
| CR8 | 38432 | 13021 |
| CR8 | 38433 | 12416 |
| CR8 | 38438 | 12208 |
| CR8 | 38444 | 11565 |
| CR8 | 38449 | 12037 |
| CR8 | 38506 | 13262 |
| CR8 | 38524 | 12749 |
| CR8 | 38628 | 13015 |
| CR8 | 38640 | 12574 |
| CR8 | 38646 | 12174 |
| CR8 | 38726 | 12880 |
| CR8 | 38808 | 12074 |
| CR8 | 38848 | 12300 |
| CR8 | 38920 | 12392 |
| CR8 | 38958 | 12835 |
| CR8 | 38959 | 11853 |
| CR8 | 38996 | 13148 |
| CR8 | 39019 | 11609 |
| CR8 | 39027 | 13280 |
| CR8 | 39060 | 11871 |
| CR8 | 39092 | 11844 |
| CR8 | 39112 | 12098 |
| CR8 | 39124 | 12350 |
| CR8 | 39208 | 12660 |
| CR8 | 39225 | 12125 |
| CR8 | 39242 | 11683 |
| CR8 | 39248 | 12340 |
| CR8 | 3925  | 12473 |
| CR8 | 39401 | 12158 |
| CR8 | 39415 | 12279 |
| CR8 | 39446 | 12880 |
| CR8 | 39484 | 12317 |
| CR8 | 39549 | 13548 |
| CR8 | 39559 | 12556 |
| CR8 | 39588 | 12826 |
| CR8 | 39606 | 12298 |
| CR8 | 39607 | 12548 |
| CR8 | 39644 | 12232 |
| CR8 | 39650 | 13166 |
| CR8 | 39654 | 12609 |
| CR8 | 39661 | 11765 |
| CR8 | 39733 | 13228 |
| CR8 | 39746 | 11899 |
| CR8 | 39909 | 12302 |
| CR8 | 39910 | 12849 |
| CR8 | 39926 | 12353 |
| CR8 | 40014 | 11752 |
| CR8 | 40042 | 13118 |
| CR8 | 40055 | 12149 |
| CR8 | 40076 | 12416 |
| CR8 | 40126 | 12587 |
| CR8 | 40148 | 12601 |
| CR8 | 40156 | 12037 |
| CR8 | 40158 | 14307 |
| CR8 | 40159 | 13542 |
| CR8 | 40164 | 11679 |
| CR8 | 40170 | 13029 |
| CR8 | 40172 | 12588 |
| CR8 | 40191 | 12768 |
| CR8 | 40193 | 13369 |
| CR8 | 40199 | 12464 |
| CR8 | 40206 | 11579 |
| CR8 | 40209 | 12860 |
| CR8 | 40210 | 13723 |
| CR8 | 40220 | 12138 |
| CR8 | 40241 | 12710 |

|     |       |       |
|-----|-------|-------|
| CR8 | 40245 | 13239 |
| CR8 | 40262 | 12869 |
| CR8 | 40264 | 14135 |
| CR8 | 40278 | 12616 |
| CR8 | 40286 | 12091 |
| CR8 | 40303 | 13204 |
| CR8 | 40333 | 14141 |
| CR8 | 40334 | 12362 |
| CR8 | 40335 | 12541 |
| CR8 | 40356 | 13672 |
| CR8 | 40358 | 12899 |
| CR8 | 40378 | 12596 |
| CR8 | 40382 | 11558 |
| CR8 | 40394 | 14248 |
| CR8 | 40407 | 12035 |
| CR8 | 40408 | 12537 |
| CR8 | 40413 | 12134 |
| CR8 | 40419 | 12157 |
| CR8 | 40426 | 12666 |
| CR8 | 40443 | 11844 |
| CR8 | 40488 | 12326 |
| CR8 | 40492 | 12089 |
| CR8 | 40495 | 12214 |
| CR8 | 40503 | 11724 |
| CR8 | 40505 | 12574 |
| CR8 | 40512 | 12992 |
| CR8 | 40518 | 14183 |
| CR8 | 40522 | 11989 |
| CR8 | 40549 | 11718 |
| CR8 | 40592 | 11969 |
| CR8 | 40597 | 13332 |
| CR8 | 40620 | 12702 |
| CR8 | 40651 | 11917 |
| CR8 | 40676 | 12688 |
| CR8 | 40678 | 11981 |
| CR8 | 40686 | 13691 |
| CR8 | 40716 | 13088 |
| CR8 | 40719 | 13209 |
| CR8 | 40733 | 12296 |
| CR8 | 40741 | 12561 |
| CR8 | 40749 | 12739 |
| CR8 | 40774 | 11831 |
| CR8 | 40779 | 12727 |
| CR8 | 40792 | 13220 |
| CR8 | 40797 | 11801 |
| CR8 | 40805 | 12442 |
| CR8 | 40827 | 11832 |
| CR8 | 40838 | 11831 |
| CR8 | 40853 | 13538 |
| CR8 | 40875 | 11935 |
| CR8 | 40882 | 12325 |
| CR8 | 40892 | 12370 |
| CR8 | 40893 | 13179 |
| CR8 | 40898 | 13189 |
| CR8 | 40912 | 13173 |
| CR8 | 40919 | 12271 |
| CR8 | 40920 | 11923 |
| CR8 | 40929 | 12289 |
| CR8 | 40932 | 13959 |
| CR8 | 40958 | 12130 |
| CR8 | 40968 | 12604 |
| CR8 | 40983 | 12702 |
| CR8 | 40984 | 11746 |
| CR8 | 41001 | 11913 |
| CR8 | 41006 | 13525 |
| CR8 | 41008 | 12271 |
| CR8 | 41012 | 13877 |

|     |       |       |
|-----|-------|-------|
| CR8 | 41016 | 12891 |
| CR8 | 41048 | 12431 |
| CR8 | 41050 | 12390 |
| CR8 | 41058 | 12665 |
| CR8 | 41068 | 13543 |
| CR8 | 41079 | 12473 |
| CR8 | 41080 | 13117 |
| CR8 | 41085 | 13844 |
| CR8 | 41088 | 12149 |
| CR8 | 41101 | 12521 |
| CR8 | 41103 | 11989 |
| CR8 | 41114 | 12241 |
| CR8 | 41119 | 11719 |
| CR8 | 41171 | 12264 |
| CR8 | 41227 | 12478 |
| CR8 | 41275 | 12462 |
| CR8 | 41284 | 12197 |
| CR8 | 41285 | 13065 |
| CR8 | 41293 | 12766 |
| CR8 | 41305 | 12291 |
| CR8 | 41373 | 12181 |
| CR8 | 41425 | 12061 |
| CR8 | 41462 | 12209 |
| CR8 | 41474 | 12045 |
| CR8 | 41490 | 13091 |
| CR8 | 41491 | 12175 |
| CR8 | 41493 | 11861 |
| CR8 | 41499 | 11922 |
| CR8 | 41500 | 13258 |
| CR8 | 41502 | 12580 |
| CR8 | 41517 | 12081 |
| CR8 | 41531 | 13008 |
| CR8 | 41535 | 12194 |
| CR8 | 41546 | 13720 |
| CR8 | 41601 | 11778 |
| CR8 | 41631 | 12658 |
| CR8 | 41652 | 12391 |
| CR8 | 41657 | 12548 |
| CR8 | 41712 | 12416 |
| CR8 | 41721 | 12676 |
| CR8 | 41733 | 11918 |
| CR8 | 41745 | 12294 |
| CR8 | 41749 | 11686 |
| CR8 | 41753 | 12886 |
| CR8 | 41755 | 11753 |
| CR8 | 41840 | 12293 |
| CR8 | 41851 | 12798 |
| CR8 | 41853 | 11612 |
| CR8 | 41854 | 11835 |
| CR8 | 41881 | 12287 |
| CR8 | 41886 | 11908 |
| CR8 | 41904 | 12976 |
| CR8 | 41908 | 12781 |
| CR8 | 41923 | 13380 |
| CR8 | 41938 | 11906 |
| CR8 | 41946 | 12337 |
| CR8 | 41978 | 12935 |
| CR8 | 42038 | 12866 |
| CR8 | 42065 | 11805 |
| CR8 | 42075 | 11782 |
| CR8 | 42081 | 12304 |
| CR8 | 42097 | 12149 |
| CR8 | 42104 | 11931 |
| CR8 | 42131 | 12691 |
| CR8 | 42149 | 12965 |
| CR8 | 42173 | 13075 |
| CR8 | 42189 | 11602 |

|     |       |       |
|-----|-------|-------|
| CR8 | 42208 | 11811 |
| CR8 | 42218 | 12273 |
| CR8 | 42236 | 12303 |
| CR8 | 42253 | 11567 |
| CR8 | 42295 | 12584 |
| CR8 | 42417 | 12245 |
| CR8 | 42426 | 11742 |
| CR8 | 42432 | 11712 |
| CR8 | 42470 | 12082 |
| CR8 | 42472 | 11877 |
| CR8 | 42479 | 12218 |
| CR8 | 42497 | 11753 |
| CR8 | 42505 | 11563 |
| CR8 | 42582 | 11794 |
| CR8 | 42622 | 12064 |
| CR8 | 42676 | 13089 |
| CR8 | 42818 | 13205 |
| CR8 | 42908 | 11595 |
| CR8 | 42959 | 13052 |
| CR8 | 42997 | 11648 |
| CR8 | 43095 | 13271 |
| CR8 | 43227 | 12694 |
| CR8 | 43697 | 11680 |
| CR8 | 43705 | 11685 |
| CR8 | 43780 | 12992 |
| CR8 | 44033 | 13139 |
| CR8 | 44151 | 12229 |
| CR8 | 44160 | 12348 |
| CR8 | 44162 | 12676 |
| CR8 | 44165 | 12272 |
| CR8 | 44182 | 12104 |
| CR8 | 44212 | 12828 |
| CR8 | 44221 | 12463 |
| CR8 | 44257 | 12174 |
| CR8 | 44277 | 12535 |
| CR8 | 44280 | 11961 |
| CR8 | 44288 | 12547 |
| CR8 | 44299 | 12579 |
| CR8 | 44308 | 11970 |
| CR8 | 44316 | 12235 |
| CR8 | 44346 | 12443 |
| CR8 | 44363 | 12158 |
| CR8 | 44396 | 11768 |
| CR8 | 44452 | 12218 |
| CR8 | 44460 | 12592 |
| CR8 | 44466 | 12233 |
| CR8 | 44501 | 12107 |
| CR8 | 44511 | 12391 |
| CR8 | 44516 | 11937 |
| CR8 | 44533 | 11947 |
| CR8 | 44552 | 12151 |
| CR8 | 44565 | 12494 |
| CR8 | 44574 | 11738 |
| CR8 | 44590 | 12153 |
| CR8 | 44602 | 12314 |
| CR8 | 44604 | 12367 |
| CR8 | 44608 | 11998 |
| CR8 | 44612 | 12918 |
| CR8 | 44623 | 11846 |
| CR8 | 44633 | 12093 |
| CR8 | 44647 | 12313 |
| CR8 | 44651 | 11605 |
| CR8 | 44655 | 12436 |
| CR8 | 44673 | 12043 |
| CR8 | 44680 | 12296 |
| CR8 | 44681 | 12195 |
| CR8 | 44688 | 11709 |

|     |       |       |
|-----|-------|-------|
| CR8 | 44703 | 12399 |
| CR8 | 44751 | 12329 |
| CR8 | 44767 | 12022 |
| CR8 | 44770 | 12078 |
| CR8 | 44778 | 12017 |
| CR8 | 44792 | 12560 |
| CR8 | 44813 | 12123 |
| CR8 | 44816 | 12384 |
| CR8 | 44820 | 11825 |
| CR8 | 44823 | 12384 |
| CR8 | 44826 | 11965 |
| CR8 | 44829 | 11715 |
| CR8 | 44837 | 12122 |
| CR8 | 44852 | 12245 |
| CR8 | 44860 | 12470 |
| CR8 | 44896 | 12672 |
| CR8 | 44910 | 12208 |
| CR8 | 44911 | 12263 |
| CR8 | 44912 | 11889 |
| CR8 | 44957 | 12348 |
| CR8 | 44958 | 12043 |
| CR8 | 44969 | 12301 |
| CR8 | 45016 | 11916 |
| CR8 | 45053 | 11993 |
| CR8 | 45070 | 12307 |
| CR8 | 45084 | 12529 |
| CR8 | 45097 | 11617 |
| CR8 | 45101 | 12310 |
| CR8 | 45105 | 12037 |
| CR8 | 45111 | 11880 |
| CR8 | 45118 | 12232 |
| CR8 | 45130 | 12484 |
| CR8 | 45131 | 12214 |
| CR8 | 45158 | 12423 |
| CR8 | 45161 | 13102 |
| CR8 | 45167 | 12254 |
| CR8 | 45179 | 12247 |
| CR8 | 45188 | 12691 |
| CR8 | 45210 | 12447 |
| CR8 | 45221 | 11687 |
| CR8 | 45225 | 12400 |
| CR8 | 45228 | 12089 |
| CR8 | 45230 | 12198 |
| CR8 | 45238 | 11927 |
| CR8 | 45246 | 11641 |
| CR8 | 45297 | 12765 |
| CR8 | 45300 | 12195 |
| CR8 | 45307 | 12262 |
| CR8 | 45308 | 12144 |
| CR8 | 45311 | 12596 |
| CR8 | 45320 | 12654 |
| CR8 | 45324 | 12474 |
| CR8 | 45326 | 12178 |
| CR8 | 45350 | 11775 |
| CR8 | 45352 | 12079 |
| CR8 | 45357 | 12614 |
| CR8 | 45382 | 12320 |
| CR8 | 45385 | 12004 |
| CR8 | 45389 | 11967 |
| CR8 | 45402 | 11974 |
| CR8 | 45404 | 11771 |
| CR8 | 45427 | 12257 |
| CR8 | 45438 | 12978 |
| CR8 | 45481 | 12205 |
| CR8 | 45484 | 13316 |
| CR8 | 45500 | 11895 |
| CR8 | 45513 | 12657 |

|     |       |       |
|-----|-------|-------|
| CR8 | 45523 | 12747 |
| CR8 | 45529 | 12110 |
| CR8 | 45536 | 11915 |
| CR8 | 45542 | 13482 |
| CR8 | 45549 | 12299 |
| CR8 | 45556 | 11967 |
| CR8 | 45563 | 12296 |
| CR8 | 45578 | 12306 |
| CR8 | 45587 | 12619 |
| CR8 | 45593 | 12493 |
| CR8 | 45601 | 12198 |
| CR8 | 45626 | 12238 |
| CR8 | 45628 | 12133 |
| CR8 | 45679 | 12147 |
| CR8 | 45682 | 12399 |
| CR8 | 45694 | 12188 |
| CR8 | 45695 | 12086 |
| CR8 | 45720 | 12340 |
| CR8 | 45744 | 12243 |
| CR8 | 45762 | 11657 |
| CR8 | 45828 | 12076 |
| CR8 | 45837 | 12048 |
| CR8 | 45844 | 12295 |
| CR8 | 45855 | 12436 |
| CR8 | 45870 | 11744 |
| CR8 | 45878 | 12517 |
| CR8 | 45879 | 11955 |
| CR8 | 45888 | 12884 |
| CR8 | 45896 | 12596 |
| CR8 | 45900 | 13739 |
| CR8 | 45951 | 13727 |
| CR8 | 45953 | 13416 |
| CR8 | 45974 | 13143 |
| CR8 | 45988 | 13369 |
| CR8 | 46013 | 13805 |
| CR8 | 46025 | 13711 |
| CR8 | 46067 | 13472 |
| CR8 | 46074 | 13404 |
| CR8 | 46079 | 13186 |
| CR8 | 46081 | 13588 |
| CR8 | 46095 | 12366 |
| CR8 | 46119 | 13485 |
| CR8 | 46157 | 13334 |
| CR8 | 46163 | 13920 |
| CR8 | 46167 | 13814 |
| CR8 | 46176 | 13662 |
| CR8 | 46189 | 14014 |
| CR8 | 46190 | 13994 |
| CR8 | 46215 | 12889 |
| CR8 | 46228 | 13553 |
| CR8 | 46243 | 13372 |
| CR8 | 46259 | 12416 |
| CR8 | 46260 | 13941 |
| CR8 | 46278 | 13353 |
| CR8 | 46329 | 13387 |
| CR8 | 46372 | 12685 |
| CR8 | 46398 | 13126 |
| CR8 | 46405 | 13493 |
| CR8 | 46450 | 13714 |
| CR8 | 46451 | 13618 |
| CR8 | 46464 | 13817 |
| CR8 | 46484 | 12156 |
| CR8 | 46539 | 13134 |
| CR8 | 46548 | 11994 |
| CR8 | 46562 | 14206 |
| CR8 | 46607 | 13656 |
| CR8 | 46608 | 13833 |

|     |       |       |
|-----|-------|-------|
| CR8 | 46611 | 13825 |
| CR8 | 46612 | 13576 |
| CR8 | 46621 | 13711 |
| CR8 | 46645 | 13176 |
| CR8 | 46661 | 13044 |
| CR8 | 46665 | 12175 |
| CR8 | 46682 | 13710 |
| CR8 | 46684 | 13821 |
| CR8 | 46706 | 13157 |
| CR8 | 46720 | 13713 |
| CR8 | 46733 | 14091 |
| CR8 | 46738 | 12751 |
| CR8 | 46766 | 13567 |
| CR8 | 46779 | 13046 |
| CR8 | 46794 | 12816 |
| CR8 | 46809 | 13550 |
| CR8 | 46819 | 13308 |
| CR8 | 46828 | 13033 |
| CR8 | 46886 | 13629 |
| CR8 | 46894 | 12714 |
| CR8 | 46905 | 13607 |
| CR8 | 46913 | 13032 |
| CR8 | 46929 | 13040 |
| CR8 | 46947 | 13760 |
| CR8 | 46963 | 13597 |
| CR8 | 46981 | 13452 |
| CR8 | 47000 | 12216 |
| CR8 | 47019 | 13380 |
| CR8 | 47078 | 12007 |
| CR8 | 47101 | 12571 |
| CR8 | 47109 | 13778 |
| CR8 | 47114 | 13416 |
| CR8 | 47129 | 13741 |
| CR8 | 47135 | 13419 |
| CR8 | 47137 | 13114 |
| CR8 | 47152 | 13632 |
| CR8 | 47173 | 12958 |
| CR8 | 47185 | 13636 |
| CR8 | 47187 | 12921 |
| CR8 | 47188 | 13172 |
| CR8 | 47200 | 13714 |
| CR8 | 47246 | 12887 |
| CR8 | 47276 | 13098 |
| CR8 | 47296 | 13781 |
| CR8 | 47306 | 13338 |
| CR8 | 47333 | 13856 |
| CR8 | 47338 | 13774 |
| CR8 | 47341 | 13891 |
| CR8 | 47357 | 13439 |
| CR8 | 47434 | 11657 |
| CR8 | 47445 | 13698 |
| CR8 | 47450 | 11544 |
| CR8 | 47462 | 13599 |
| CR8 | 47476 | 13087 |
| CR8 | 47479 | 13483 |
| CR8 | 47519 | 13617 |
| CR8 | 47544 | 13728 |
| CR8 | 47552 | 14030 |
| CR8 | 47616 | 13182 |
| CR8 | 47626 | 13252 |
| CR8 | 47638 | 13318 |
| CR8 | 47663 | 13561 |
| CR8 | 47676 | 13422 |
| CR8 | 47715 | 13848 |
| CR8 | 47724 | 13960 |
| CR8 | 47738 | 11825 |
| CR8 | 47766 | 13143 |

|     |       |       |
|-----|-------|-------|
| CR8 | 47792 | 13185 |
| CR8 | 47806 | 13635 |
| CR8 | 47841 | 13178 |
| CR8 | 47862 | 13671 |
| CR8 | 47878 | 13718 |
| CR8 | 47947 | 13725 |
| CR8 | 47960 | 12506 |
| CR8 | 47963 | 13439 |
| CR8 | 48039 | 13063 |
| CR8 | 48075 | 13235 |
| CR8 | 48083 | 13627 |
| CR8 | 48089 | 13370 |
| CR8 | 48099 | 13229 |
| CR8 | 48122 | 13846 |
| CR8 | 48138 | 13155 |
| CR8 | 48156 | 13239 |
| CR8 | 48159 | 13465 |
| CR8 | 48186 | 13309 |
| CR8 | 48200 | 13448 |
| CR8 | 49516 | 12712 |
| CR8 | 49665 | 11806 |
| CR8 | 49990 | 12256 |
| CR8 | 50031 | 12688 |
| CR8 | 50100 | 11643 |
| CR8 | 50102 | 12250 |
| CR8 | 50179 | 13058 |
| CR8 | 50382 | 12298 |
| CR8 | 50392 | 12794 |
| CR8 | 50464 | 12198 |
| CR8 | 50569 | 11920 |
| CR8 | 50648 | 12225 |
| CR8 | 507   | 11848 |
| CR8 | 50707 | 12117 |
| CR8 | 50725 | 11536 |
| CR8 | 508   | 11912 |
| CR8 | 50857 | 12428 |
| CR8 | 51048 | 11946 |
| CR8 | 51836 | 12934 |
| CR8 | 51890 | 13778 |
| CR8 | 51982 | 13397 |
| CR8 | 52142 | 12072 |
| CR8 | 52201 | 13386 |
| CR8 | 52294 | 11877 |
| CR8 | 52341 | 12251 |
| CR8 | 52380 | 11769 |
| CR8 | 52401 | 12393 |
| CR8 | 52703 | 11523 |
| CR8 | 5272  | 11874 |
| CR8 | 52843 | 12482 |
| CR8 | 53368 | 11895 |
| CR8 | 53678 | 12826 |
| CR8 | 53750 | 12521 |
| CR8 | 53955 | 12873 |
| CR8 | 53967 | 12560 |
| CR8 | 54955 | 11850 |
| CR8 | 55241 | 11704 |
| CR8 | 55347 | 12349 |
| CR8 | 5538  | 13290 |
| CR8 | 55906 | 11537 |
| CR8 | 5687  | 11624 |
| CR8 | 57308 | 12503 |
| CR8 | 57341 | 12354 |
| CR8 | 57357 | 13211 |
| CR8 | 57583 | 12249 |
| CR8 | 57982 | 13674 |
| CR8 | 58446 | 11730 |
| CR8 | 58534 | 11786 |

|     |       |       |
|-----|-------|-------|
| CR8 | 58567 | 12373 |
| CR8 | 58625 | 11736 |
| CR8 | 58706 | 11611 |
| CR8 | 58886 | 12161 |
| CR8 | 58889 | 12244 |
| CR8 | 58959 | 11758 |
| CR8 | 58971 | 12540 |
| CR8 | 58976 | 12983 |
| CR8 | 58982 | 11585 |
| CR8 | 59053 | 12959 |
| CR8 | 59062 | 12758 |
| CR8 | 59087 | 11892 |
| CR8 | 59127 | 12548 |
| CR8 | 59158 | 12009 |
| CR8 | 59178 | 12344 |
| CR8 | 59196 | 12827 |
| CR8 | 59198 | 12520 |
| CR8 | 59247 | 11589 |
| CR8 | 59259 | 11894 |
| CR8 | 59279 | 12770 |
| CR8 | 59318 | 12493 |
| CR8 | 59322 | 12164 |
| CR8 | 59373 | 12802 |
| CR8 | 59404 | 11804 |
| CR8 | 59410 | 11848 |
| CR8 | 59417 | 11655 |
| CR8 | 59420 | 12328 |
| CR8 | 59454 | 13639 |
| CR8 | 59549 | 11726 |
| CR8 | 59551 | 12493 |
| CR8 | 59560 | 12724 |
| CR8 | 59566 | 13006 |
| CR8 | 59571 | 11977 |
| CR8 | 59578 | 11535 |
| CR8 | 59725 | 12651 |
| CR8 | 59740 | 11666 |
| CR8 | 59755 | 11993 |
| CR8 | 59760 | 12389 |
| CR8 | 59786 | 12181 |
| CR8 | 59837 | 12843 |
| CR8 | 59875 | 12695 |
| CR8 | 59903 | 12318 |
| CR8 | 59904 | 12251 |
| CR8 | 59915 | 13297 |
| CR8 | 59935 | 12171 |
| CR8 | 60031 | 12180 |
| CR8 | 60050 | 12092 |
| CR8 | 60071 | 12510 |
| CR8 | 60072 | 11656 |
| CR8 | 60100 | 11731 |
| CR8 | 60105 | 11583 |
| CR8 | 60119 | 12119 |
| CR8 | 60205 | 12198 |
| CR8 | 60231 | 11830 |
| CR8 | 60246 | 12352 |
| CR8 | 60281 | 12911 |
| CR8 | 60291 | 12132 |
| CR8 | 60315 | 12144 |
| CR8 | 60328 | 12051 |
| CR8 | 60346 | 11607 |
| CR8 | 60351 | 11574 |
| CR8 | 60374 | 12635 |
| CR8 | 60378 | 12348 |
| CR8 | 60395 | 12515 |
| CR8 | 60430 | 11969 |
| CR8 | 60447 | 11765 |
| CR8 | 60467 | 13189 |

|     |       |       |
|-----|-------|-------|
| CR8 | 60472 | 12846 |
| CR8 | 60475 | 12393 |
| CR8 | 60523 | 12990 |
| CR8 | 60560 | 11608 |
| CR8 | 60608 | 12403 |
| CR8 | 60638 | 12556 |
| CR8 | 60672 | 12029 |
| CR8 | 60732 | 12350 |
| CR8 | 60758 | 12008 |
| CR8 | 60827 | 12350 |
| CR8 | 60837 | 11552 |
| CR8 | 6094  | 11888 |
| CR8 | 60966 | 12317 |
| CR8 | 61046 | 12048 |
| CR8 | 61062 | 11843 |
| CR8 | 61105 | 12121 |
| CR8 | 61106 | 12469 |
| CR8 | 61133 | 11702 |
| CR8 | 61158 | 12066 |
| CR8 | 61191 | 12270 |
| CR8 | 61277 | 11944 |
| CR8 | 61285 | 12006 |
| CR8 | 61302 | 11634 |
| CR8 | 61355 | 12706 |
| CR8 | 61473 | 12473 |
| CR8 | 61677 | 13251 |
| CR8 | 61909 | 13123 |
| CR8 | 61965 | 13674 |
| CR8 | 61984 | 11708 |
| CR8 | 62086 | 11861 |
| CR8 | 62476 | 13429 |
| CR8 | 62521 | 11849 |
| CR8 | 62585 | 13139 |
| CR8 | 62719 | 12276 |
| CR8 | 62734 | 13415 |
| CR8 | 62825 | 11989 |
| CR8 | 62853 | 12806 |
| CR8 | 62890 | 12316 |
| CR8 | 62927 | 11664 |
| CR8 | 63093 | 13161 |
| CR8 | 63286 | 12329 |
| CR8 | 63336 | 12522 |
| CR8 | 63573 | 13048 |
| CR8 | 63864 | 12260 |
| CR8 | 64220 | 12368 |
| CR8 | 64568 | 12279 |
| CR8 | 64986 | 12015 |
| CR8 | 65050 | 11923 |
| CR8 | 65435 | 12410 |
| CR8 | 65635 | 12926 |
| CR8 | 65807 | 12724 |
| CR8 | 65875 | 12795 |
| CR8 | 66605 | 11756 |
| CR8 | 66715 | 12159 |
| CR8 | 67028 | 11625 |
| CR8 | 67664 | 11728 |
| CR8 | 68290 | 11782 |
| CR8 | 69931 | 12608 |
| CR8 | 69992 | 12487 |
| CR8 | 70051 | 12750 |
| CR8 | 70082 | 13145 |
| CR8 | 70118 | 11952 |
| CR8 | 70179 | 12582 |
| CR8 | 70627 | 12484 |
| CR8 | 70639 | 12033 |
| CR8 | 70669 | 12386 |
| CR8 | 70706 | 12182 |

|     |       |       |
|-----|-------|-------|
| CR8 | 70729 | 11956 |
| CR8 | 70775 | 11768 |
| CR8 | 70850 | 12876 |
| CR8 | 70911 | 12774 |
| CR8 | 70970 | 12314 |
| CR8 | 71020 | 12863 |
| CR8 | 71056 | 12457 |
| CR8 | 71075 | 12969 |
| CR8 | 71089 | 11855 |
| CR8 | 71091 | 12535 |
| CR8 | 71113 | 11714 |
| CR8 | 71191 | 12668 |
| CR8 | 71202 | 13255 |
| CR8 | 71224 | 11898 |
| CR8 | 71226 | 13106 |
| CR8 | 71261 | 12054 |
| CR8 | 71274 | 12198 |
| CR8 | 71411 | 12388 |
| CR8 | 71601 | 11769 |
| CR8 | 71820 | 12587 |
| CR8 | 71863 | 12258 |
| CR8 | 71907 | 12044 |
| CR8 | 71916 | 12106 |
| CR8 | 71919 | 11819 |
| CR8 | 72061 | 12276 |
| CR8 | 72147 | 12368 |
| CR8 | 72200 | 12776 |
| CR8 | 72453 | 12038 |
| CR8 | 72531 | 12811 |
| CR8 | 72563 | 12545 |
| CR8 | 72582 | 12221 |
| CR8 | 72610 | 12113 |
| CR8 | 72629 | 12301 |
| CR8 | 72637 | 11639 |
| CR8 | 72646 | 12113 |
| CR8 | 72729 | 12371 |
| CR8 | 72761 | 13031 |
| CR8 | 72795 | 11772 |
| CR8 | 72839 | 13233 |
| CR8 | 72884 | 12692 |
| CR8 | 72916 | 12320 |
| CR8 | 72927 | 12177 |
| CR8 | 72987 | 11823 |
| CR8 | 73514 | 13322 |
| CR8 | 73689 | 12866 |
| CR8 | 73726 | 11764 |
| CR8 | 73871 | 12733 |
| CR8 | 74031 | 12097 |
| CR8 | 74065 | 12078 |
| CR8 | 75099 | 11858 |
| CR8 | 75644 | 11848 |
| CR8 | 75661 | 12101 |
| CR8 | 75676 | 11654 |
| CR8 | 7636  | 12962 |
| CR8 | 7833  | 12497 |
| CR8 | 7871  | 12339 |
| CR8 | 8038  | 12896 |
| CR8 | 8070  | 12653 |
| CR8 | 8071  | 13323 |
| CR8 | 8247  | 13453 |
| CR8 | 8300  | 13178 |
| CR8 | 8316  | 12351 |
| CR8 | 841   | 11549 |
| CR8 | 8437  | 12023 |
| CR8 | 8529  | 12536 |
| CR8 | 8546  | 12733 |
| CR8 | 8593  | 11565 |

|         |       |       |
|---------|-------|-------|
| CR8     | 8663  | 11573 |
| CR8     | 8808  | 11601 |
| CR8     | 8842  | 11984 |
| CR8     | 8983  | 11840 |
| CR8     | 9103  | 11857 |
| CR8     | 9182  | 12656 |
| CR8     | 9232  | 12212 |
| CR8     | 9253  | 11752 |
| CR8     | 9571  | 12984 |
| CR8     | 9917  | 11769 |
| CR8     | 9938  | 12942 |
| CR8_PMA | 10362 | 12653 |
| CR8_PMA | 10672 | 1     |
| CR8_PMA | 10804 | 11997 |
| CR8_PMA | 11137 | 12472 |
| CR8_PMA | 11657 | 11410 |
| CR8_PMA | 11745 | 12263 |
| CR8_PMA | 11853 | 13156 |
| CR8_PMA | 12094 | 13015 |
| CR8_PMA | 12326 | 1     |
| CR8_PMA | 13093 | 11390 |
| CR8_PMA | 13769 | 11294 |
| CR8_PMA | 14055 | 11504 |
| CR8_PMA | 14137 | 11444 |
| CR8_PMA | 14194 | 12314 |
| CR8_PMA | 28504 | 12771 |
| CR8_PMA | 29382 | 1     |
| CR8_PMA | 30430 | 12391 |
| CR8_PMA | 30513 | 11975 |
| CR8_PMA | 30787 | 1     |
| CR8_PMA | 30996 | 12292 |
| CR8_PMA | 31218 | 12025 |
| CR8_PMA | 31307 | 12838 |
| CR8_PMA | 31464 | 1     |
| CR8_PMA | 32200 | 11410 |
| CR8_PMA | 32497 | 1     |
| CR8_PMA | 33258 | 11219 |
| CR8_PMA | 33873 | 12338 |
| CR8_PMA | 34161 | 1     |
| CR8_PMA | 34266 | 11950 |
| CR8_PMA | 35042 | 1     |
| CR8_PMA | 35066 | 11683 |
| CR8_PMA | 35235 | 13269 |
| CR8_PMA | 35254 | 12305 |
| CR8_PMA | 36035 | 11682 |
| CR8_PMA | 36693 | 11202 |
| CR8_PMA | 37076 | 11997 |
| CR8_PMA | 37253 | 11400 |
| CR8_PMA | 46420 | 11812 |
| CR8_PMA | 48776 | 12698 |
| CR8_PMA | 49322 | 12183 |
| CR8_PMA | 50779 | 11394 |
| CR8_PMA | 58435 | 13509 |
| CR8_PMA | 59143 | 12659 |
| CR8_PMA | 59524 | 13190 |
| CR8_PMA | 59989 | 14173 |
| CR8_PMA | 60211 | 11314 |
| CR8_PMA | 60315 | 12605 |
| CR8_PMA | 60348 | 13170 |
| CR8_PMA | 60395 | 12529 |
| CR8_PMA | 60398 | 11936 |
| CR8_PMA | 60421 | 12227 |
| CR8_PMA | 60579 | 11466 |
| CR8_PMA | 60732 | 12416 |
| CR8_PMA | 60827 | 12876 |
| CR8_PMA | 61060 | 12704 |
| CR8_PMA | 61158 | 12898 |

|         |       |       |
|---------|-------|-------|
| CR8_PMA | 61302 | 11782 |
| CR8_PMA | 61327 | 11458 |
| CR8_PMA | 62483 | 1     |
| CR8_PMA | 7682  | 12870 |
| CR8_PMA | 7690  | 11898 |
| CR8_PMA | 8217  | 12490 |
| CR8_PMA | 9071  | 12133 |
| CR8_PMA | 9082  | 12341 |
| CR8_PMA | 9425  | 12368 |
| CR8_PMA | 9427  | 12207 |
| CR8_PMA | 9474  | 11626 |
| CR8_PMA | 9615  | 12633 |
| CR8_PMA | 9619  | 11637 |
| UR      | 10744 | 14178 |
| UR      | 10760 | 12342 |
| UR      | 10870 | 13439 |
| UR      | 10995 | 11770 |
| UR      | 11025 | 12890 |
| UR      | 11150 | 12918 |
| UR      | 11543 | 12319 |
| UR      | 11897 | 12530 |
| UR      | 12211 | 11720 |
| UR      | 12217 | 13629 |
| UR      | 12326 | 1     |
| UR      | 12333 | 11483 |
| UR      | 12392 | 12649 |
| UR      | 12912 | 12325 |
| UR      | 13091 | 11831 |
| UR      | 13092 | 11598 |
| UR      | 13106 | 11712 |
| UR      | 13274 | 12284 |
| UR      | 1331  | 11775 |
| UR      | 14199 | 12650 |
| UR      | 1440  | 11851 |
| UR      | 14477 | 12871 |
| UR      | 14545 | 12233 |
| UR      | 14599 | 13755 |
| UR      | 14633 | 11705 |
| UR      | 14678 | 11741 |
| UR      | 1481  | 11778 |
| UR      | 15035 | 13022 |
| UR      | 15249 | 13637 |
| UR      | 15292 | 13212 |
| UR      | 15342 | 13951 |
| UR      | 1566  | 11458 |
| UR      | 15908 | 11656 |
| UR      | 15941 | 12165 |
| UR      | 16096 | 12437 |
| UR      | 16161 | 12369 |
| UR      | 16250 | 12327 |
| UR      | 1638  | 11615 |
| UR      | 16425 | 12209 |
| UR      | 1650  | 12284 |
| UR      | 16520 | 12313 |
| UR      | 16522 | 12324 |
| UR      | 16590 | 12709 |
| UR      | 16847 | 11844 |
| UR      | 16916 | 12393 |
| UR      | 16971 | 12652 |
| UR      | 17051 | 12867 |
| UR      | 17322 | 12943 |
| UR      | 17348 | 12006 |
| UR      | 17519 | 11737 |
| UR      | 20652 | 11900 |
| UR      | 20782 | 11789 |
| UR      | 24509 | 12475 |
| UR      | 25139 | 11930 |

|    |       |       |
|----|-------|-------|
| UR | 25425 | 11993 |
| UR | 25471 | 13159 |
| UR | 25637 | 11781 |
| UR | 26227 | 12068 |
| UR | 26288 | 12945 |
| UR | 28064 | 12041 |
| UR | 29061 | 12804 |
| UR | 30017 | 13203 |
| UR | 30787 | 1     |
| UR | 30882 | 12450 |
| UR | 31080 | 12274 |
| UR | 31616 | 13126 |
| UR | 32357 | 13063 |
| UR | 33058 | 13189 |
| UR | 33189 | 11653 |
| UR | 3351  | 13676 |
| UR | 3360  | 13234 |
| UR | 339   | 11707 |
| UR | 34240 | 12755 |
| UR | 34464 | 13530 |
| UR | 3464  | 13020 |
| UR | 34741 | 12347 |
| UR | 3482  | 13627 |
| UR | 35586 | 12940 |
| UR | 35629 | 13246 |
| UR | 3571  | 13256 |
| UR | 36142 | 12990 |
| UR | 3624  | 13699 |
| UR | 36381 | 13476 |
| UR | 3647  | 11952 |
| UR | 3672  | 13279 |
| UR | 36762 | 13306 |
| UR | 36785 | 12933 |
| UR | 36803 | 13686 |
| UR | 36867 | 12814 |
| UR | 36899 | 12809 |
| UR | 36937 | 13066 |
| UR | 36943 | 13146 |
| UR | 37002 | 13462 |
| UR | 37007 | 12364 |
| UR | 37071 | 12761 |
| UR | 37089 | 13332 |
| UR | 37107 | 12883 |
| UR | 37124 | 12484 |
| UR | 37125 | 13031 |
| UR | 37129 | 13456 |
| UR | 37166 | 11907 |
| UR | 37178 | 12537 |
| UR | 37193 | 12884 |
| UR | 37198 | 13083 |
| UR | 37226 | 12098 |
| UR | 37293 | 12037 |
| UR | 37300 | 13657 |
| UR | 37312 | 12206 |
| UR | 37315 | 13024 |
| UR | 37316 | 12420 |
| UR | 37329 | 12241 |
| UR | 3746  | 13481 |
| UR | 3752  | 12865 |
| UR | 37566 | 13224 |
| UR | 37653 | 12508 |
| UR | 3771  | 12595 |
| UR | 37726 | 13759 |
| UR | 37735 | 12046 |
| UR | 37877 | 13309 |
| UR | 37920 | 11824 |
| UR | 37948 | 12100 |

|    |       |       |
|----|-------|-------|
| UR | 3796  | 12346 |
| UR | 38001 | 12698 |
| UR | 38303 | 12520 |
| UR | 38331 | 12700 |
| UR | 38400 | 12315 |
| UR | 38432 | 12948 |
| UR | 38449 | 11771 |
| UR | 38463 | 12218 |
| UR | 38519 | 12476 |
| UR | 3871  | 13515 |
| UR | 38770 | 13104 |
| UR | 38813 | 13115 |
| UR | 39044 | 12499 |
| UR | 39106 | 12415 |
| UR | 39124 | 11796 |
| UR | 3925  | 12331 |
| UR | 39321 | 11812 |
| UR | 39484 | 11762 |
| UR | 39676 | 11957 |
| UR | 39684 | 12217 |
| UR | 39809 | 12091 |
| UR | 39869 | 11625 |
| UR | 39936 | 11742 |
| UR | 40158 | 14303 |
| UR | 40172 | 12318 |
| UR | 40178 | 13115 |
| UR | 40202 | 12934 |
| UR | 40219 | 13186 |
| UR | 40222 | 12527 |
| UR | 40238 | 12471 |
| UR | 40241 | 12436 |
| UR | 40245 | 13259 |
| UR | 40263 | 11933 |
| UR | 40264 | 14181 |
| UR | 40286 | 12002 |
| UR | 40289 | 12805 |
| UR | 40314 | 12962 |
| UR | 40322 | 11898 |
| UR | 40325 | 12256 |
| UR | 40334 | 12126 |
| UR | 40347 | 13195 |
| UR | 40373 | 12899 |
| UR | 40376 | 12403 |
| UR | 40389 | 12616 |
| UR | 4039  | 13741 |
| UR | 40391 | 12807 |
| UR | 40399 | 12556 |
| UR | 40407 | 11817 |
| UR | 40408 | 12564 |
| UR | 40412 | 11713 |
| UR | 40426 | 12332 |
| UR | 40436 | 13243 |
| UR | 40443 | 11586 |
| UR | 40473 | 13405 |
| UR | 40476 | 12173 |
| UR | 40479 | 13164 |
| UR | 40484 | 12573 |
| UR | 40492 | 11669 |
| UR | 40510 | 12857 |
| UR | 4055  | 13401 |
| UR | 40550 | 14147 |
| UR | 40574 | 12647 |
| UR | 40575 | 13045 |
| UR | 40577 | 12467 |
| UR | 40621 | 12777 |
| UR | 40640 | 12691 |
| UR | 40651 | 11540 |

|    |       |       |
|----|-------|-------|
| UR | 40679 | 12962 |
| UR | 40686 | 13627 |
| UR | 40696 | 12558 |
| UR | 40697 | 12583 |
| UR | 40716 | 13215 |
| UR | 40718 | 13336 |
| UR | 40733 | 12059 |
| UR | 40740 | 12924 |
| UR | 40753 | 12129 |
| UR | 40779 | 12720 |
| UR | 4078  | 12716 |
| UR | 40819 | 12356 |
| UR | 40856 | 12192 |
| UR | 40861 | 12562 |
| UR | 40882 | 12329 |
| UR | 40884 | 12720 |
| UR | 40889 | 12775 |
| UR | 40892 | 11990 |
| UR | 40898 | 13027 |
| UR | 40899 | 12675 |
| UR | 40911 | 12695 |
| UR | 4093  | 13049 |
| UR | 40930 | 11866 |
| UR | 40932 | 13939 |
| UR | 40943 | 13117 |
| UR | 40945 | 11910 |
| UR | 40958 | 11764 |
| UR | 40960 | 12459 |
| UR | 40968 | 12614 |
| UR | 40992 | 12782 |
| UR | 41001 | 12103 |
| UR | 41006 | 13327 |
| UR | 41008 | 12509 |
| UR | 41016 | 12508 |
| UR | 41018 | 12929 |
| UR | 4102  | 13526 |
| UR | 41035 | 11926 |
| UR | 41054 | 13266 |
| UR | 41061 | 13316 |
| UR | 41068 | 13199 |
| UR | 41080 | 12957 |
| UR | 41088 | 11887 |
| UR | 41123 | 12709 |
| UR | 41194 | 12667 |
| UR | 41227 | 12439 |
| UR | 41284 | 12041 |
| UR | 41332 | 11947 |
| UR | 41373 | 12008 |
| UR | 41428 | 11631 |
| UR | 41456 | 12858 |
| UR | 41462 | 12245 |
| UR | 41491 | 12018 |
| UR | 41499 | 11886 |
| UR | 41542 | 11896 |
| UR | 41589 | 12010 |
| UR | 41631 | 12554 |
| UR | 41639 | 11747 |
| UR | 41745 | 12456 |
| UR | 41749 | 11599 |
| UR | 41840 | 12179 |
| UR | 41854 | 11712 |
| UR | 41881 | 12197 |
| UR | 41886 | 12247 |
| UR | 41904 | 12906 |
| UR | 41908 | 12447 |
| UR | 41938 | 11737 |
| UR | 41964 | 11688 |

|    |       |       |
|----|-------|-------|
| UR | 42065 | 11988 |
| UR | 421   | 11633 |
| UR | 42104 | 11806 |
| UR | 42129 | 12397 |
| UR | 42285 | 12062 |
| UR | 42295 | 12660 |
| UR | 42310 | 11820 |
| UR | 42479 | 12610 |
| UR | 42511 | 14498 |
| UR | 42514 | 11721 |
| UR | 42609 | 12178 |
| UR | 42616 | 12325 |
| UR | 42672 | 11761 |
| UR | 42684 | 11540 |
| UR | 42706 | 11683 |
| UR | 4273  | 12884 |
| UR | 42748 | 11914 |
| UR | 42889 | 11841 |
| UR | 42933 | 12585 |
| UR | 42959 | 12747 |
| UR | 43361 | 11661 |
| UR | 43461 | 11885 |
| UR | 43496 | 12012 |
| UR | 43507 | 11565 |
| UR | 43571 | 12476 |
| UR | 43709 | 11820 |
| UR | 43740 | 11721 |
| UR | 43755 | 11959 |
| UR | 43982 | 12136 |
| UR | 44057 | 11681 |
| UR | 44069 | 11658 |
| UR | 44153 | 11986 |
| UR | 44212 | 12457 |
| UR | 44224 | 12112 |
| UR | 44243 | 12115 |
| UR | 44277 | 12110 |
| UR | 44299 | 12226 |
| UR | 44346 | 11660 |
| UR | 44371 | 12325 |
| UR | 44380 | 12471 |
| UR | 44422 | 11631 |
| UR | 44432 | 11455 |
| UR | 44482 | 11611 |
| UR | 44534 | 11682 |
| UR | 44562 | 11806 |
| UR | 44565 | 11923 |
| UR | 44623 | 11560 |
| UR | 44647 | 11693 |
| UR | 44673 | 11794 |
| UR | 44677 | 11600 |
| UR | 44680 | 11694 |
| UR | 44681 | 11747 |
| UR | 44688 | 11652 |
| UR | 44702 | 11542 |
| UR | 44743 | 11805 |
| UR | 44744 | 11569 |
| UR | 44745 | 11919 |
| UR | 44751 | 11748 |
| UR | 44770 | 11545 |
| UR | 44789 | 11996 |
| UR | 44792 | 11875 |
| UR | 44816 | 12025 |
| UR | 44820 | 11669 |
| UR | 44823 | 11937 |
| UR | 44860 | 11965 |
| UR | 44896 | 12163 |
| UR | 44910 | 11504 |

|    |       |       |
|----|-------|-------|
| UR | 44976 | 12207 |
| UR | 45005 | 11501 |
| UR | 45008 | 11922 |
| UR | 45016 | 11571 |
| UR | 45052 | 12272 |
| UR | 45118 | 11502 |
| UR | 45131 | 11663 |
| UR | 45151 | 11828 |
| UR | 45158 | 11499 |
| UR | 45161 | 12375 |
| UR | 45210 | 12053 |
| UR | 45230 | 11800 |
| UR | 45269 | 11985 |
| UR | 45286 | 11957 |
| UR | 45297 | 12096 |
| UR | 45299 | 11838 |
| UR | 45300 | 11498 |
| UR | 45304 | 12107 |
| UR | 45320 | 12106 |
| UR | 45324 | 12193 |
| UR | 45343 | 11932 |
| UR | 45402 | 11586 |
| UR | 45405 | 11595 |
| UR | 45438 | 12473 |
| UR | 45440 | 11634 |
| UR | 45481 | 11817 |
| UR | 45487 | 12578 |
| UR | 45507 | 11458 |
| UR | 45508 | 12047 |
| UR | 45513 | 12557 |
| UR | 45523 | 12350 |
| UR | 45529 | 11594 |
| UR | 45542 | 13447 |
| UR | 45563 | 11647 |
| UR | 45587 | 12054 |
| UR | 45592 | 11891 |
| UR | 45595 | 13056 |
| UR | 45636 | 11657 |
| UR | 45679 | 11605 |
| UR | 45682 | 11912 |
| UR | 45695 | 11509 |
| UR | 45720 | 11888 |
| UR | 45725 | 11469 |
| UR | 45744 | 11845 |
| UR | 45786 | 12370 |
| UR | 45844 | 11814 |
| UR | 45861 | 11800 |
| UR | 45870 | 11486 |
| UR | 45879 | 11963 |
| UR | 45887 | 12059 |
| UR | 45914 | 13396 |
| UR | 45951 | 13320 |
| UR | 45955 | 13083 |
| UR | 46074 | 12935 |
| UR | 46079 | 13576 |
| UR | 46138 | 13575 |
| UR | 46162 | 13463 |
| UR | 46167 | 13495 |
| UR | 46217 | 13637 |
| UR | 46226 | 13401 |
| UR | 46259 | 11980 |
| UR | 46360 | 12802 |
| UR | 46362 | 12717 |
| UR | 46367 | 13335 |
| UR | 46417 | 13546 |
| UR | 46450 | 13368 |
| UR | 46464 | 13480 |

|    |       |       |
|----|-------|-------|
| UR | 46520 | 12617 |
| UR | 46532 | 13451 |
| UR | 46571 | 13576 |
| UR | 46608 | 13531 |
| UR | 46621 | 13398 |
| UR | 46661 | 12485 |
| UR | 46684 | 13496 |
| UR | 46712 | 13623 |
| UR | 46738 | 11959 |
| UR | 46752 | 13487 |
| UR | 46766 | 13235 |
| UR | 46809 | 13532 |
| UR | 46826 | 13571 |
| UR | 46886 | 13329 |
| UR | 46891 | 13555 |
| UR | 46905 | 13370 |
| UR | 46913 | 12760 |
| UR | 46981 | 13324 |
| UR | 46998 | 13277 |
| UR | 47019 | 13452 |
| UR | 47109 | 13411 |
| UR | 47129 | 13355 |
| UR | 47135 | 12717 |
| UR | 47187 | 12371 |
| UR | 47200 | 13311 |
| UR | 47296 | 13399 |
| UR | 47327 | 13036 |
| UR | 47338 | 13461 |
| UR | 47357 | 12865 |
| UR | 47445 | 13311 |
| UR | 47544 | 13415 |
| UR | 47552 | 13760 |
| UR | 47616 | 12624 |
| UR | 47663 | 13164 |
| UR | 47680 | 13487 |
| UR | 47715 | 13535 |
| UR | 47728 | 13460 |
| UR | 47806 | 13380 |
| UR | 47819 | 13551 |
| UR | 47832 | 13507 |
| UR | 47841 | 12421 |
| UR | 47869 | 13697 |
| UR | 47947 | 13342 |
| UR | 48021 | 11566 |
| UR | 48039 | 12751 |
| UR | 48048 | 13429 |
| UR | 48075 | 12501 |
| UR | 48081 | 13438 |
| UR | 48083 | 13193 |
| UR | 48200 | 12879 |
| UR | 48830 | 13235 |
| UR | 52305 | 11998 |
| UR | 53955 | 13016 |
| UR | 5538  | 12798 |
| UR | 57357 | 12712 |
| UR | 58959 | 11561 |
| UR | 58971 | 12954 |
| UR | 58987 | 12954 |
| UR | 59062 | 13275 |
| UR | 59178 | 13263 |
| UR | 59463 | 12801 |
| UR | 59740 | 12042 |
| UR | 59760 | 12261 |
| UR | 59875 | 12982 |
| UR | 59935 | 12228 |
| UR | 60010 | 12948 |
| UR | 60072 | 12352 |

|        |       |       |
|--------|-------|-------|
| UR     | 60119 | 12441 |
| UR     | 60279 | 12071 |
| UR     | 60281 | 12800 |
| UR     | 60315 | 11856 |
| UR     | 60405 | 12019 |
| UR     | 60467 | 12874 |
| UR     | 60538 | 12421 |
| UR     | 60557 | 12421 |
| UR     | 60565 | 11528 |
| UR     | 60697 | 11763 |
| UR     | 60741 | 11656 |
| UR     | 60822 | 12438 |
| UR     | 60827 | 12012 |
| UR     | 61013 | 13346 |
| UR     | 61094 | 13068 |
| UR     | 61101 | 12289 |
| UR     | 61105 | 12021 |
| UR     | 61158 | 11513 |
| UR     | 61317 | 12861 |
| UR     | 61785 | 12201 |
| UR     | 61909 | 12505 |
| UR     | 61935 | 11484 |
| UR     | 62664 | 13138 |
| UR     | 63161 | 11766 |
| UR     | 63182 | 12518 |
| UR     | 63711 | 12149 |
| UR     | 66457 | 12322 |
| UR     | 66513 | 12685 |
| UR     | 66896 | 12297 |
| UR     | 69931 | 12974 |
| UR     | 69992 | 11648 |
| UR     | 70051 | 11778 |
| UR     | 70850 | 12474 |
| UR     | 71202 | 13283 |
| UR     | 71261 | 12144 |
| UR     | 71274 | 11920 |
| UR     | 71936 | 11780 |
| UR     | 71954 | 12580 |
| UR     | 71968 | 11613 |
| UR     | 72019 | 12021 |
| UR     | 72042 | 12984 |
| UR     | 72147 | 12700 |
| UR     | 72160 | 13004 |
| UR     | 72597 | 13251 |
| UR     | 72855 | 12698 |
| UR     | 72859 | 12055 |
| UR     | 73689 | 12415 |
| UR     | 74031 | 11585 |
| UR     | 7871  | 12775 |
| UR     | 8249  | 12712 |
| UR     | 8368  | 12049 |
| UR     | 8808  | 11905 |
| UR     | 8983  | 13070 |
| UR     | 9232  | 11832 |
| UR     | 9872  | 12987 |
| UR     | 9921  | 12107 |
| UR     | 9931  | 12580 |
| UR_PMA | 15495 | 12796 |
| UR_PMA | 61158 | 12838 |
